# Supplementary material for: Transcriptome Profiling Reveals Differential Gene Expression of Secreted Proteases and Highly Specific Gene Repertoires Involved in Lactarius–Pinus Symbioses
Source: Front Plant Sci. 2021 Aug 19;12:714393. doi: 10.3389/fpls.2021.714393 (PMC8417538; doi:10.3389/fpls.2021.714393)
Supplement: Supplementary Table 1 — Details of the fungal samples used for RNA sequencing and quality of reads. Wpi, weeks post inoculation; FLM, free-living mycelia. [file Table_1.xlsx]

## Sheet: Sheet1
Table S1. Details of the fungal samples used for RNA sequencing and quality of reads. wpi: Weeks post inoculation. FLM: Free- living mycelia
Fungal x Pine combinaison used	Developmental stage	Replicat	RNASeq LibraryID	Clean reads number	Q20 (%)	Mapping to fungal genome
						Uniquely mapped (%)	Multi-mapped (%)	Total mapped (%)
L.deliciosius 48 x P. taeda	Ectomycorrhiza: 2 wpi	Rep. 1	co48pt_2w1	41948700	95.36	58.75	7.65	66.4
		Rep. 2	co48pt_2w2	42251876	95.24	64.03	8.16	72.19
		Rep. 3	co48pt_2w3	42014842	95.34	63.3	7.71	71.01
	Ectomycorrhiza: 4 wpi	Rep. 1	myc48pt_4w1	43350574	95.41	55.73	7.05	62.78
		Rep. 2	myc48pt_4w2	42530296	95.49	56.84	7.43	64.27
		Rep. 3	myc48pt_4w3	43088884	95.48	55.74	7.22	62.96
	Ectomycorrhiza: 6 wpi	Rep. 1	myc48pt_6w1	39056394	96.2	55.5	7.08	62.58
		Rep. 2	myc48pt_6w2	42393158	95.66	58.5	7.07	65.57
		Rep. 3	myc48pt_6w3	39147968	95.72	54.22	6.96	61.18
	FLM	Rep. 1	Ld48_2w_ct1	42751322	95.81	79.27	9.88	89.15
		Rep. 2	Ld48_2w_ct2	41974178	95.63	79.82	9.9	89.72
		Rep. 3	Ld48_2w_ct3	42998490	95.23	75.53	9.27	84.8
L.sanguifluus B21 x P.sylvestris	Ectomycorrhiza	Rep. 1	B21ps1	41561064	97.19	60.61	7.34	67.95
		Rep. 2	B21ps2	41538994	97.05	59.78	6.91	66.69
		Rep. 3	B21ps3	41557458	97.07	56.81	7.23	64.04
	FLM	Rep. 1	B21ct1	41438526	96.75	85.57	9.9	95.47
		Rep. 2	B21ct2	41355546	96.76	85.56	9.92	95.48
		Rep. 3	B21ct3	41336892	97.06	85.36	10.22	95.58
L.akahatsu QP x P.tabuliformis	Ectomycorrhiza	Rep. 1	QPtab1	41377956	97.11	64.05	6.96	71.01
		Rep. 2	QPtab2	41411598	97.05	60.65	6.83	67.48
		Rep. 3	QPtab3	41596028	97.27	62.78	7.31	70.09
	FLM	Rep. 1	QPct1	41210802	96.71	87.43	8.24	95.67
		Rep. 2	QPct2	41296482	96.97	87.58	8.36	95.94
		Rep. 3	QPct3	41268858	96.74	87.41	8.39	95.8
L vividus 141 x P.taeda	Ectomycorrhiza	Rep. 1	141pt1	41355936	96.95	73.03	3.33	76.36
		Rep. 2	141pt2	41372424	97.03	67.75	3.34	71.09
		Rep. 3	141pt3	40074708	97.58	57.77	2.62	60.39
	FLM	Rep. 1	141ct1	40150130	97.18	92.35	4.1	96.45
		Rep. 2	141ct2	40128142	97.42	92.55	4.09	96.64
		Rep. 3	141ct3	41499372	97.22	91.98	4.14	96.12
