# Supplementary material for: Transcriptome Profiling Reveals Differential Gene Expression of Secreted Proteases and Highly Specific Gene Repertoires Involved in Lactarius–Pinus Symbioses
Source: Front Plant Sci. 2021 Aug 19;12:714393. doi: 10.3389/fpls.2021.714393 (PMC8417538; doi:10.3389/fpls.2021.714393)
Supplement: Supplementary Table 2 — Newly predicted Lactarius genes and their functionnal annotations. [file Table_2.XLSX]

## Sheet: Table S2
Table S2. Newly predicted Lactarius genes and their functionnal annotation.
Species	Newly predicted gene ID	Length of gene (nt)	Length of the putative protein (aa)	putative protein sequence	BLASTp best hit ID of the putative protein against NCBI Nr database (NA: no hit )	Evalue of the best hit	Description of the best hit	Gene regulation during mycorrhization (LFC > 2 or <-2 and p.value adjusted < 0.05)	Secretion annotation	Lipase annotation	Peptidase (MEROPS) annotation	PFAM domain annotation_ID	PFAM domain annotation_short description
Lactarius akahatsu	Lacaka1|MSTRG.7914	1635	106	MRSVFFLAVIAAPLIALADPEGSPFAELVRRPPDPNLLARSSIDPSSVSKECQSTCTPIIKTLGVRTALFSPSPKHRCSFFLGRRLAIASLRANAHKGTTMPLGPA	NA	NA	NA	No differential expression	SSP	NA	NA	NA	NA
Lactarius akahatsu	Lacaka1|MSTRG.4320	1734	116	MHYYHCISVLSVLATSLLGGFAKRLSPPWDDMHIKHSWNAVPKNWVAMGPPPPGTTIDLYVAVKPQRENALVDTLIVLALPPTCHMTSRDHQSKNSEPQINFDSKIMLLITNINMT	NA	NA	NA	No differential expression	SSP	NA	NA	NA	NA
Lactarius akahatsu	Lacaka1|MSTRG.11986	2894	118	LVLAQPANLMPFILLASSQASLPDVTLNPTKTFYPLPFHPLRAQPGHCPGKSAGHVVLAFQVTLVTICLPGNSLQPNACQEGLEAACNTALCKLCALSFRDCATAQVNDDVTPNAWYQ	NA	NA	NA	No differential expression	SSP	NA	NA	NA	NA
Lactarius akahatsu	Lacaka1|MSTRG.3653	1182	119	MVRLSLCAFMSMYVAVLVAVPLRSSPLIILSPSLNSRDHLRETLDNPEGAAVVVTLTQTSRRGPQPGAGAAACETPPSKDTPTGQPSRSVLHQFRFPSTRRSEKTASYLLTETNSTRGM	NA	NA	NA	No differential expression	SSP	NA	NA	NA	NA
Lactarius akahatsu	Lacaka1|MSTRG.5154	1892	122	MRYKHMSPWFFLFWFVLFILKESWNDLLDFIEALFLCTVLIGDGHLNRNDELIGDNDGIGGGEIFGFRQETKWGFIPPIHIFLCQNAVPVEKSRLFLSTRRNFEFSLVSSDAAKRLRIRASV	NA	NA	NA	No differential expression	SSP	NA	NA	NA	NA
Lactarius akahatsu	Lacaka1|MSTRG.2961	3830	128	MVSFRRPLVRIILLCLFIVFLFTARLPHTDSSRFFDLAPPQDRLLPIPHRPIGSPRHRIKVQRPLADPMAANDGPWAERADAVRGAFLHAYQGYLTHAAPHDELKPISKLPVDKCVCPLPRAAAALVD	OCH87824.1	6.1e-07	seven-hairpin glycosidase [Obba rivulosa]	No differential expression	SSP	NA	NA	NA	NA
Lactarius akahatsu	Lacaka1|MSTRG.5187	3560	131	MVALVKLTFFWLEARLQMFQEAIRVARSERGGNDIFTGRTLFVGCPLGAKPSARFDDASTFAFLVVVFDLTGFSPSESDSAFRLLELAARFGGIDKAVAWVAQDFNREQRGRERALTKLRIKDITRRDKRV	NA	NA	NA	No differential expression	SSP	NA	NA	NA	NA
Lactarius akahatsu	Lacaka1|MSTRG.1353	5894	133	MSLSVLIIASKCTRALQWSRSPALVCLSSELGILPDGVTGDFVPNLFSSGGDGRSSSSSFMYCALIERTLVWVSGLGGNTCTVGSPGFVPLRRDEDPGVPTPCGTISSFATTAGLLPQLPIGEDGKERGDDVG	NA	NA	NA	No differential expression	SSP	NA	NA	NA	NA
Lactarius akahatsu	Lacaka1|MSTRG.4758	1839	137	MKFTSTLISLAALFSVASADTVRFNTFYDNASTSMNNVACSNGDNGLVNKFPTFGSLPSFPNIGGVSAVKGWNSPECGSCWQLTYGGKTIYVTAIDTISDGFDISLGAMNTLTNGKAQQLDVIDAQATQVDKWHCGL	XP_007269801.1	6e-37	SnodProt1 [Fomitiporia mediterranea MF3/22]	No differential expression	SSP	NA	NA	PF07249.13	Cerato-platanin
Lactarius akahatsu	Lacaka1|MSTRG.5809	1009	140	MWNFLIAFFTPFITSDIHYKYGFIFACTSRRNNKPLNSNNGHTACNLFASVFVFLFLYESSNLSLEAVDQMYNDPNCKPWNSSTWAPPGYDNRRDLIEKTRAEQAHRDDREEAPIEKAARRSSATGSATFDEPAAPNEKV	XP_003030823.1	1.5e-27	uncharacterized protein SCHCODRAFT_68300 [Schizophyllum commune H4-8]	No differential expression	SSP	NA	NA	NA	NA
Lactarius akahatsu	Lacaka1|MSTRG.8434	1856	157	MHITRFLHSGLMPALLGRGLLATAASDPCVQVAGLQFVDSADAIACQKSFPFNETLRQNVLSVISRVFDFYTFEDFYLNSPPPFQESTTNIRAEITRINSTHYAVSTLSSLCTDYWFMICHDVKTDFDFNRDLWDFTTQLNDGHTRTSSIFGHVGHA	OSC99693.1	3.3e-39	hypothetical protein PYCCODRAFT_1438060 [Trametes coccinea BRFM310]	No differential expression	SSP	NA	NA	NA	NA
Lactarius akahatsu	Lacaka1|MSTRG.7046	1401	158	MTPRSFLGRLITIPLLLFGLLLIALPSFVLGREFSMIWNDMTSGQILRTPFMQSELVRSSPLDPALALPVSRDGQFTQSPGLLSRRRPRQHASEEHLHAAVATESSAIDPTCEHDQTYRQLVQSQTALEAQLAELRAAMDVQGTLLRRIMERVDAKGS	RDX50375.1	4.7e-17	voltage-gated potassium channel [Polyporus brumalis]	No differential expression	SSP	NA	NA	NA	NA
Lactarius akahatsu	Lacaka1|MSTRG.1267	686	160	PTLPSPHHLVSLLVTLLLRPNMITFPSPVGTHEHPLFLKNDFPRDVVKGPASENLSTILHSTHPSPLLPSSPRDLGACLHPRPLNGPERRSLPRAKSALSTPPAPPLRPPSFNQLDSLSPFSFLVTILILCFTPPFHLDACLSTVHAVDATSARDRKTSP	NA	NA	NA	No differential expression	SSP	NA	NA	NA	NA
Lactarius akahatsu	Lacaka1|MSTRG.6249	716	163	LVSPTLPSPHHLVSLLVTLLLRPNMITFPSPVGTHEHPLFLKNDFPRDVVKGPASENLSTILHSTHPSPLLPSSPRDLGACLHPRPLNGPERRSLPRAKSASSTPPAPPLRPPSFNQLDSLSPFSFLVTILILCFTPPFHLDACPSTVHAVDATSARDRKTSP	NA	NA	NA	No differential expression	SSP	NA	NA	NA	NA
Lactarius akahatsu	Lacaka1|MSTRG.11339	4998	165	MTLCVVLALPFRIQLILLLHSEDRVDGSLPAQQYHQPHGLASHQMIYAHTAALANSRVACTVDEAAQYLAAYKQSEHCERVFKTPGVVLRMAFTTLEMLRMSLTRSDPPAPHRPPTPCSLSSSPKLRAPSDSTEKRPDAFDQAALPRKAGEALRSHHSPCCYHVG	NA	NA	NA	No differential expression	SSP	NA	NA	NA	NA
Lactarius akahatsu	Lacaka1|MSTRG.7137	7903	188	MSGFGLSAFFFSSISHALFPGNASDFLLVLGLGTALPMVLGFFFVRPIPLPLTTGEAGSSVNYQSLSTDPGVFQDHGSSSTHLVFQSDEDEEADSHESVPLHAPRPHALSDSVEASSSPGVLNRRHVNMPPPTREPPSKKVAEGRGVDLHRWSLWKTIDFWIVCSIHILCKKHFLYSRDVELHSDAFQ	KZV69069.1	1.3e-26	MFS general substrate transporter [Peniophora sp. CONT]	No differential expression	SSP	NA	NA	NA	NA
Lactarius akahatsu	Lacaka1|MSTRG.5502	2337	195	MRFHPLSVLSVLAFGPLSGLPTSFASHWDDLLPKHAWNSVPENWENLGHPPADTTIDLHIALKAQNENALIDALIEVKQSRPPKVRPLHHSSACVVLRCPAALGRQGAHLSREEVAQLVAPPSDVLELANAWLDHYGVHPSTISTKHGGSWLTLTGVPVPRANELLSCVVPTVPTHWDERDSSPHAQLRAPGGAG	XP_009548822.1	4.4e-25	serine protease S53 [Heterobasidion irregulare TC 32-1]	No differential expression	SSP	NA	NA	PF09286.12	Pro-kuma_activ
Lactarius akahatsu	Lacaka1|MSTRG.9826	6274	199	MPFLFVCFEFLVFFLPFLFPTFSLPLANPPVLDTYFRTFMNGAETELRAVVELLPTAVSAEETLLTYAAPTPASPDSPILFLPQDPSSEGFVLAKPGTAAHSSLGSEPIPANNTSDQPPAGAVLTPLMMAYYPGWVAEDFPPESIDFSRFDWIDFAFAEPDESFTLAQGESDTLLRLVGVAHQKSKKVKLSVGGWDGSK	RDX55533.1	6.7e-21	glycoside hydrolase [Polyporus brumalis]	No differential expression	SSP	NA	NA	NA	NA
Lactarius akahatsu	Lacaka1|MSTRG.7287	1290	203	LAQRQLNESQPQWCVILILLLRAEMNGTTPGMVSYALPTALYAQVQAIAPTMCFSYPHTLQQIAHTQSARRADFIGANNDNTVLGTIRELCTPRVAANTTANCHADDVLRFSTLTTAGSTNALWQLSSGFCEDGIGTTPSSRDSYVYRRPLVGCTRRRVPLWQIDSCSGLQANSAAVPDPGGPIDVYRIDEADVTTNHESNVT	NA	NA	NA	No differential expression	SSP	NA	NA	NA	NA
Lactarius akahatsu	Lacaka1|MSTRG.7238	4869	212	MVRPKLLLIFILLLISLLFVKPSANVQSEGRLGGWPLKQDKVDYIKGAASFVSPNTISMQLNDGGESTVEAKTIIIATGSEVAPFPGGAIKIDDQQIVSSTGVLSLQKVPEKAIVIGSGIIGLEMGVWSRQGADVTVVEFLNGTSGVASMRRFHASSRRRLLRAGSRTQCVILNFPCRREDSRGMTRLEADVVLVAVGHTFTASASKCRRQS	GAW08386.1	2.4e-40	dihydrolipoyl dehydrogenase [Lentinula edodes]	No differential expression	SSP	NA	NA	PF07992.15	Pyr_redox_2
Lactarius akahatsu	Lacaka1|MSTRG.3994	672	223	GKSIVWLVIFQLSSPVTVLMLTTSSAIIQHIMTLRDAGKATLAYFYFDFRDEEKQNVRNLVTSLMVQLSAYSKPCCDIIYRLYSIHGKGTQQPSNVILIDRLKEMLFVAAQHPIFVIMDALDECPEYGMPTPREAVLNLVKDLVHLQLPNLHIGVTSRQEVDIQTKLRPLTVNAISLHDETRQRVVIADYVSSVVSLDEHMREWRDEDKRLVVKELSERADGM	EMD36623.1	1.3e-36	hypothetical protein CERSUDRAFT_124368 [Gelatoporia subvermispora B]	No differential expression	SSP	NA	NA	NA	NA
Lactarius akahatsu	Lacaka1|MSTRG.5181	4449	234	MYLSATLMITTLSFFLSSALASVIASAPTSNLDEHNANATLAKLFSANAQWAGAVNAADPDFFKQSAKGPQTPKVRFWFLGPNSCSSSSYPHLCFRTRRCSGSDVLTRASPKVLSLPRARATSSSIATLPSKLCIPSFIYPPTVILDSLLTFMRFAYSQVHLNDDSALSAITYAVAHVHVEHSTPSPLPFSLFGLTGRSFACVSRKSSSSATLSAAAPMQLSRPPSPGRRRPNR	NA	NA	NA	No differential expression	SSP	NA	NA	NA	NA
Lactarius akahatsu	Lacaka1|MSTRG.11950	1999	255	MEQPTLPLIILPFPLVLLPGARATFPIPANLADALLRLIESSPSNPVLAAVPLVQNEGNTIVHKWAVTARITRFVRPRPNSDEPHLLTLTGLARVRLTDPPQVVNDPLPLPRLDVSYPPQDADSPPATDVVQDFKAAAIRLLERFSQDTSQSARKRESWTRIAHLVEESESHKAAALADAIISAVGAEHADKLGGSDALFRSSLMLLRHHISFVESARAGFSPLRGSSWHPPLSRDRRPPTLPLATPWEMADISP	XP_009548439.1	9.5e-28	LON domain serine protease S16 [Heterobasidion irregulare TC 32-1]	No differential expression	SSP	NA	NA	PF02190.17	LON_substr_bdg
Lactarius akahatsu	Lacaka1|MSTRG.8552	8841	262	MMVRLMLPIWLVSWAVLLPLTSVNTNVPGDSGLDMFIFGNIGTTDQDRYSAHLLLTWIFTSKLQGRYPSSESLTSLTSIVWIWWNIKSEMAHYVRVRQHYLVSSSHSSTAQACSVLVTGIPPRYLSESALTRLFSHLPGGVRKVWINRDLGDMPDLHNQRLKACQMLESAETSLLNMAIKRNSKMLKNGAESGDGGRDGSGHWDHQTRKRSGDSTNPHRGAGAQGQAPIAQTTPFLLGTFLHSLFWERKSIQLNGRANEFTN	KDQ58423.1	4.7e-54	hypothetical protein JAAARDRAFT_667498 [Jaapia argillacea MUCL 33604]	No differential expression	SSP	NA	NA	PF14703.7,PF13967.7	PHM7_cyt,RSN1_TM
Lactarius akahatsu	Lacaka1|MSTRG.3614	11649	326	MSHLSHLLVAAPLVGLVSWFIVPLAKRAFRYLPPGPKGLPFIGDVKHASDQGWLASPQRKDDYGDTVDLQLNLFRNVLTHLSGELMYLSVFGQGSILVVNSQRVAVDLLEKRSNIYSDRPRYISFNEFLTENLTFAFTGYGDLYATRYSVFFLRLFPIDGAGSGVLQWKASRNLSYQTSTPSRVVKAIMLALSLMKSSLMKKHFQRHAWSIILSINYHLPPVESEDDPVIVGVVNHVERAARELRPGARLVEYFPWMRYVPSRCVYRITDHGPPLTVARRFAKWKRDAQYWFIQDSLRHERLLSKVADDLVHTRCGGPPMKWIINL	XP_009549684.1	3.7e-32	cytochrome P450 monooxygenase 25 [Heterobasidion irregulare TC 32-1]	Induced during mycorrhization	Secreted	NA	NA	NA	NA
Lactarius akahatsu	Lacaka1|MSTRG.6436	21524	327	MALQSVFLLPFLPLLTESRAHDLCGSSIHLCGLSAAPSQHRARCAQRRRRPLRLPRPYSLAGYRAPRRDAPSCRRLQRRRDVRIPRCHSRKPTASRGAISLRPWRGPLREHAMGDRMCGLTSPHLQTPHLLVPKTAPFFLGYEILDPAQFAAFLYPDSAAQAPAAQSTPTYHARDSATPGLPSNPRMPLARLWMQLGTYLDYWTGLHTPSLSDTLRTLLPAGEEHAEIDARLAAALPPADRAIFPQLLVTPDWPPVLHIHGSEDSAVPADSSRAIHARLLAAKVETVLRIVDGSEHAFDHKEDNAEATFGELFDEAVGFLRAALVDA	KIM54622.1	1.5e-41	hypothetical protein SCLCIDRAFT_1221837 [Scleroderma citrinum Foug A]	No differential expression	Secreted	NA	NA	NA	NA
Lactarius akahatsu	Lacaka1|MSTRG.6030	2150	351	MRCHALSVLATLSTSLLCGFATSVTSRWDGMKVKHAWGAVPKNWKSLGHPSNETTIDLHLALKSHREDALVEALYEVSDPEHSRYAPTPPICARIYPPVPLSHGRYGAHLSKEQVAEVIAPHPDTLNLVSSWLRHYDIPSSSITMILGGNWLRVAGVSVSQANRILGASYQLYRHVETNDTVLRTISYSLPEVLHAYIQTIVPTTYFSSPLTEGMRPRMHLSTAVEARGKAGSVLSKRDEDSVTPSYLRWLYKTLGYAPKATDRNALGIAGFGGQFPSPQDLALFMNEYRTDGEDATFTVTQINGGGYDPANPGLEANLDIQYAEAMAYPTRHIFYSTALDGKYTFTIDKI	XP_009548822.1	8.1e-78	serine protease S53 [Heterobasidion irregulare TC 32-1]	No differential expression	Secreted	NA	NA	PF09286.12	Pro-kuma_activ
Lactarius akahatsu	Lacaka1|MSTRG.9007	9974	365	MFLSHVRLIVAFLVAFHSTFGQSTSHPTRLDGPDLTFRTPVRIMVPPEPPILRGDTFSGLIHVESYPSPTAQAVDDIEAVAETPLSPRAAPQSSSPSNAVVWETNPVAPPQSVEMSVQTAIAYDVSHVTQLGAGDLPRKEKILSYSSPIWGTFGAQEQNNTRAPSRPQILIETRPPPSSNPSPEQDGRDCPSPSSTVLGSDIIRGTPTHRGKDRTRILHSAPHSALSPTSPIPSLLQLATHQSWASSISVHPPNNENKQQSGPILPKETTQWLRPTTSRSSKSGQGSKSSRSSRRSKSSIRSAKAAVVTTGEGNFLRSTVFRAVSSRMSRGFPVRTQHTRPMGVVRGPRPSPSASRKIGEGHSEG	NA	NA	NA	No differential expression	Secreted	NA	NA	NA	NA
Lactarius akahatsu	Lacaka1|MSTRG.9467	8918	376	MPHPHSLELVKSWLIFHGVLPSSISVSHGGNWLTLTGVSVSKANDLLGASYQLYRHAETNETIVRTIGYSLPAALHKHVQTVAPTTYFASPRMSWQTPRKRPGGAAAEQVNATSGDFVTALLGRADHDATPPFLRWLYNSVTYVPAATDRNVLGIAGYAEEYPNPVDLTTFMDRFHSPGTGATYTVVQVDQGGYDPNNPGTEANLNVQYASGMAYPTPIVYYSVGDGTDGEDDQYLAWVDYMLNLDEIPQTISTSYANYETDFPLDYARSLCDLFMQLGARGVSVLFASGDDGVGEGDCVTDGNVRFRPTFPASCTCDGILCLKAVHKRSSFTTQPRFRRSLGHHRRWNDALQAGDSIRPQRRRLLGLLQAPRLPG	XP_009548822.1	3.3e-77	serine protease S53 [Heterobasidion irregulare TC 32-1]	No differential expression	Secreted	NA	NA	PF09286.12	Pro-kuma_activ
Lactarius akahatsu	Lacaka1|MSTRG.9360	4136	434	MPGLTLTFAVAAAVAHVIAVGSCLCGGNDDDHPHNSYYSRSSLNGGTTRIRTQPSYRPPPLPPSYTHRPPATNAQTTPKPSAPPDYGHGIYHPSTVSSHTRTPSQTQPSSTRTQPSATLTQPSISQSASTGARTLSSVPTERDRLLPAVSSGVYHSSVVSPYTRTPSQTQPSSTRTQPSIAQSASHVPSCVPTERGLLPPISNGVYHPSVVSPFTQTPSQTQQSLIAQSASTSSRVLSCVPTERDTLPTVSSGLSPYNQTPSLARASSTLTQPSSTLTRLSSTLTQSSSTHAQLSYTLPQPSPTRAQASSQHSSLLNAVHEYFRTSSHVPSRVLSTERDPLLPPIIQVVESDLRSDEPAGVEGLDFAKKLREQARRKGREMSEARSRAKSAQKKGYRGA…	NA	NA	NA	No differential expression	Secreted	NA	NA	PF08590.11	DUF1771
Lactarius akahatsu	Lacaka1|MSTRG.9443	19913	438	MHYNWLSVLSVLTGSLFILATPLSPLWDDMKVKHAWHTVPANWEILGHPPVGTTINLYLALKPHREDALIDALYEVSDPRHPKHVLSATFCAPMYSFVLLLRCRYGLHLSKDQVAELVAPHSDTLELVYSWLEHHGVPSSSVSMTHGGSWLTLTGIPVIQANDLLGASYRVYQHAETKDRILRTVGYALPAVLHGHVRTVAPTTYFGSPRTPQQTPRNHASRAAAALAESASGEVVKSLSSRMILSTPSYLRHLYNMMEYVPAATLQNTLGVAGYFGDYPRQEDLTTFMENYRSDGATATFSLIQVGDEALPNEPNHEASSNIQYTAALTYPTPQTFYSTPNGEESYLVWANYVLAQQDIPQTISTSYGGDEQDFNEAYAIEVCRLFAMLGARGASVLY…	XP_009548822.1	3.7e-104	serine protease S53 [Heterobasidion irregulare TC 32-1]	No differential expression	Secreted	NA	NA	PF09286.12	Pro-kuma_activ
Lactarius akahatsu	Lacaka1|MSTRG.5166	4089	463	MRFHPLSVLSVLTFGLPDSLATPLASHWDDLREKHTWNSVPENWQNLGHPPADTTIDLHIALKAKNENALIDALIEVSSPGHPKCVLFNHSSTRVVLTRPVAPGRQGAHLSREEVAELVAPPSDVLELANAWLEHHGVHPSTISTKHGGSWLTLSGVPVSRANKLLSASYQLYQHIGTNNTVLRTLSYALPAALVEHVQSVAPTTHFGFPRTPRQEPLMRRGGATTEQTKVPEGDPGMVLSSRDQAVTPSSLRSFYKTSRYVPLAASWNVLGVAGYNGDWPSLDDLRQFMNQYRFDATDATYRVVQINGGGYDPSNPATEANLNMQYTSAIAYPTTHIFYSTGSSDTLGDPFLNWLDYVLGLWSVPQTVSTPYGVPEYTVPPDYATRVCGLFAQLGLRG…	XP_009548822.1	9.9e-108	serine protease S53 [Heterobasidion irregulare TC 32-1]	Induced during mycorrhization	Secreted	NA	NA	PF09286.12	Pro-kuma_activ
Lactarius akahatsu	Lacaka1|MSTRG.889	5255	480	MSYHQLFVLSVLAAATFPDFVTPLAPSWDDLRVKHTWDAVPANWETLGNPPSGTTIDLHVALKSHNESALIEALYEVSDPRSPKHVLYNTPPLTMYSPVRLLCCRYGAHLSREQVAQLVAPHTHPLDLINSWLAHHGVPTSSISTSHGGGWLTLAGVPVSQANKLLGASYQLYRHTGTNDTTILRTVGYALPAVLHTHVQTIVPTTHFASTQTMRQTPRRRSVGATADMASREPVTVLSGRDGAVMPSDLRWLYRTVTYVPTATDQNLLGMAGYLGDHPGPQDLRKFMTQCRADAVDATFTVELLNGSEYDPNNPSSEANQNMQYAQAMAYPTPHLFYSIGGEIAVLPGSNLPAPGDPFLVWLNFVLSGQRVPPTISTSYGVQETTTPPEYAMALCNLF…	XP_009548822.1	3.4e-103	serine protease S53 [Heterobasidion irregulare TC 32-1]	No differential expression	Secreted	NA	NA	PF09286.12	Pro-kuma_activ
Lactarius akahatsu	Lacaka1|MSTRG.11242	6817	515	MLYRWIPVLLFLSTVTLSGIATSRWDDMRPKHSWKTIPENWECLGLSTPGTMIDLYIALKPYRENALVDALNEVSDPGHPRHVSSTMPSLRMFSRVPLLRYRYGAHLSREQVADIVAPHPDTVQLVHSWLEHHRVTSSSVSVTHGGSFLTVTGVSVSKANDLLGASYQLYTHTKTNETIIRTLGYSLPVVLHGHVQTVAPTTFFSSPVTQWLTPLKRSDVAAVRPGKSPSGRPVTMPLNRRTTDVTPAFLRWLYSTFAYVPSAMDRNVVGVTGYSGEYPSPADLNSYMRKYRPDGTDATFTLALVGGGFDPNNPGREANVNLQLTEGMTYPTPHIFYSTPSSNGDSYLAWLGYVLSQEYLPQTISTSYGAIERLYPMEYASQLCLLFAQLGARGASVLF…	XP_009548822.1	9e-102	serine protease S53 [Heterobasidion irregulare TC 32-1]	No differential expression	Secreted	NA	NA	PF09286.12	Pro-kuma_activ
Lactarius akahatsu	Lacaka1|MSTRG.9984	5557	522	MHYHRLSVLCALAVIARPIDSVATPFPPNWNHMHTKHRWNTIPGKWESIGRPPVGSTIDLSIALKPHREHALTDTIHEVSNPKHPKHALFFIPPPTQVTLLRSRYGAYLSKDQVAKLVAPHPYTLKLVETWLRHHGVSPSNVSTSHGGNWLTVTGVAVSTANELLGASYQLYRYAETNETILRTVGYALPTALHAHVQTVAPTTYFGSPLTSQERAHGHRGRAVAALSTRDVRVTPAALRSRYNSVTYQPAATEQNRIGITGFHGQYVGDKDLKRFMRRFRSDANDPTFLVIDINNSGYDPKKPGFEANLDMQYTQGIAWPTPHVFYSIGGKAEEFIPDSFTPVNDNEPFLGWLDTMIRSEDIPQTISTSYGGNEQTFPPDYAKSVCQLFGQLGARGIS…	XP_009548822.1	2e-125	serine protease S53 [Heterobasidion irregulare TC 32-1]	No differential expression	Secreted	NA	NA	PF09286.12	Pro-kuma_activ
Lactarius akahatsu	Lacaka1|MSTRG.2748	5865	524	MQYLRLSVLCALTVITTPLDSTATPFPPNWNHMHTKHRWNAIPGKWESIGQPPVGTTIDLSIALRPHREHALADAIHEVSNPKHPKHALCFILPPTHVTLLRSRYGAYLSKEQVAKLVAPHPYTLKLVETWLRHHGVSPSNVSTSHGGNWLTVTGVPVSTANELLGASYQLYRYAGTNETILRTVGYALPVALHVHVQTVAPTTYFGSPLTPRERPRGHRGRAVAALSTRGGLVTPSFLRRLYNSATYQPVATHQNTIGVTGFQGQYVGDEDLEKFMRLFRSDARNPTFLVIDINDSGYDPKMPGSEANLDMQYTQGIAWPTPHVFYSIGGLAEEFIPDSFTPVNTNEPYLRWLDTMIRQEDIPQTISTSYGGNEQTFPPDYAKSVCELFGQLGARGVS…	XP_009548822.1	3.7e-127	serine protease S53 [Heterobasidion irregulare TC 32-1]	No differential expression	Secreted	NA	NA	PF09286.12	Pro-kuma_activ
Lactarius akahatsu	Lacaka1|MSTRG.7047	20272	578	MHYLWLSVLCALVVITRPLDSAATPFAPNWNNMHTKHRWNAIPGKWESIGQPPVGITIDLRIALKPHREHALTDAIYEVSNPNHPKHVLFFVPPPTQVTLLRCRYGAYLSKEQVAKLVAPHPYTLEVVEAWLRHHGVSPSNVSTTHGGNWLTVTGVPVSKANELLGASYQLYRYAGTNETILRTVGYALPVALHTHVQTVAPTTYFGSPLTPRERPRGHRVSALSTRDDHVTPAVLRSLYNSVTYQPAATEQNMIGVTGFSGQYVSDEDLELFMALFRSDANDPTFLVIDVNDSGYDPSKPGSEANLDMQYTQGMAWPTPHVFYSMGGVAEEFIPDSFIPVNTNEPFLGWLEVMTRLEDLPQTISTSYGGDEQTFPRDYATSVCELFGQLGARGISVLF…	XP_009548822.1	5.2e-114	serine protease S53 [Heterobasidion irregulare TC 32-1]	No differential expression	Secreted	NA	NA	PF09286.12	Pro-kuma_activ
Lactarius akahatsu	Lacaka1|MSTRG.8697	3670	95	MAETIQPNTTLYINNLNDKINKDEIRSQLFALFTTYGKLVDVVATKTPKMRGQAFLVFTDLASATAALRACDGMAFYDKPMVRFLFYFVVSCHLH	KIK98736.1	6.9e-32	hypothetical protein PAXRUDRAFT_823518 [Paxillus rubicundulus Ve08.2h10]	No differential expression	Not secreted	NA	NA	PF00076.23	RRM_1
Lactarius akahatsu	Lacaka1|MSTRG.10504	1501	99	MLWRADDGIAITETNETGHVASYSYRELRELVRKIATALRLHGLQPGDRVAGSFFGLVFVTFTCRVVITHRSHYRKQNNIYRYRSSYGESWRHLHEYRN	KZV69340.1	1.6e-10	acetoacetate-CoA ligase [Peniophora sp. CONT]	No differential expression	Not secreted	NA	NA	PF00501.29	AMP-binding
Lactarius akahatsu	Lacaka1|MSTRG.1142	1977	99	MPVDISFPALPTLTCEGAEIYMAFNTIYNVCGFRKPYCNDRVAHHPPPTPAMTQPSPSPRSSSFHFPPPHLTTHTNTVTHAHLQQHPQQYPRQHTHSNT	NA	NA	NA	No differential expression	Not secreted	NA	NA	NA	NA
Lactarius akahatsu	Lacaka1|MSTRG.11620	1640	99	PLPHVQTPRRYGRIVPADQEGSLAADEDFVGALQDMASVESSYQKAINGEPDSDGGEEDGEEEDEDGKGGEDPQEDGDAGSTGDLAAADDNMAWVDTFI	NA	NA	NA	No differential expression	Not secreted	NA	NA	NA	NA
Lactarius akahatsu	Lacaka1|MSTRG.2435	2577	99	HTYIRIDESTLNDYTLKVKVICTFIMTNAIDLYGAPRSTCTRRVALIAKERNIPYNLTPVDLMKGEHTHASYREHQPFGQVPYITVRLSPTSPLPYLIS	XP_007313901.1	1.3e-12	hypothetical protein SERLADRAFT_457720 [Serpula lacrymans var. lacrymans S7.9]	No differential expression	Not secreted	NA	NA	PF13417.7,PF13409.7	GST_N_3,GST_N_2
Lactarius akahatsu	Lacaka1|MSTRG.5111	1496	99	MTSLDGVSPSGPLARILAYNMAVYSTHRLRGLPSVGNFLLWAQIVRGRGAEWYLMGKRTRWEEFIADRYSSHINPDVCCFLTALSDYGKDDDKDGDVLM	NA	NA	NA	No differential expression	Not secreted	NA	NA	NA	NA
Lactarius akahatsu	Lacaka1|MSTRG.7027	3995	99	MIQQGVSDSETPLSIGRVMDWVEARLEAVRAREEEELEEDEENSSKKEGQASKLKASSTLARASSAPAVPQQQSPREQPVSFFLPFPLLLLLLSHRPRG	NA	NA	NA	No differential expression	Not secreted	NA	NA	NA	NA
Lactarius akahatsu	Lacaka1|MSTRG.7039	3373	99	MPVDISFPALPTLTCEGAEIYTAFNTIYNVCGFRKPYCNDRVAHHPPPTPAMTQPSPSPRSSSFHFPPPHLTTHTNTVTHAHLQQHPQQYPQQHTHSNT	NA	NA	NA	No differential expression	Not secreted	NA	NA	NA	NA
Lactarius akahatsu	Lacaka1|MSTRG.7142	2081	99	MVQSRVLIDVRSKLEARPPIDLFRPWLYSCRFRYSTYLSQEQVAGLVVPHPGPRTLGFVNSWLEHRAVLRINDTLWRLLDDHRSVNVHLRTDSTCLVRN	NA	NA	NA	No differential expression	Not secreted	NA	NA	NA	NA
Lactarius akahatsu	Lacaka1|MSTRG.8585	2328	99	MWLHSDSIMTTTGNFHTQYSSADDFCQAFDLTQRIPGPFLDQATKSSQLVLLNASRDSKGLIDVIAESLGASSQDVVPIRICIPLLGSQVGEIYNPRYG	OJA11727.1	5.2e-06	hypothetical protein AZE42_02937 [Rhizopogon vesiculosus]	No differential expression	Not secreted	NA	NA	NA	NA
Lactarius akahatsu	Lacaka1|MSTRG.8885	7882	99	MSLFSPQVSGYLVALAAILLVSLFVWRIVYNIYFHPLSHFPGPKLAACSRLWLAYRELIQGESLSDLRAQLHRQYGVQNILLSISSIYLFSRRDYSLGT	BAL05164.1	2.9e-09	cytochrome P450 [Phanerochaete chrysosporium]	No differential expression	Not secreted	NA	NA	NA	NA
Lactarius akahatsu	Lacaka1|MSTRG.9580	4301	99	METSRMFLPLMFPDRTGSVFGSEFPELYDRMYLCVCRTRRDSDGAAQYGIYDAPVTPFSSPVATLDYGAGGALGTVMFVGPGGSPRTHEMSSFLTVVGG	XP_009547869.1	2.8e-07	hypothetical protein HETIRDRAFT_419117 [Heterobasidion irregulare TC 32-1]	No differential expression	Not secreted	NA	NA	NA	NA
Lactarius akahatsu	Lacaka1|MSTRG.2031	2154	100	MDRRRPYSLSQDALQPLVDRPRVPAPRAVFVLNTSSPSHRPNLAFSLSKCQDHSSSVLNHLQDAVGDRAGHRAVVGELLSCVTMSRPSLIENFVSSLPLT	NA	NA	NA	No differential expression	Not secreted	NA	NA	NA	NA
Lactarius akahatsu	Lacaka1|MSTRG.2992	2367	100	MTIDGDLRIAAVCMVLHTLPTPFCGVAIDQEYNLTESPLSGTRILAERRNPPRQSPDFTKRDSHSSTYLDLVLSITVRPHLKIGSDDQLFQSSIDRQWGT	NA	NA	NA	No differential expression	Not secreted	NA	NA	NA	NA
Lactarius akahatsu	Lacaka1|MSTRG.6016	4665	100	MVMFRFLTLDTGASLLGVQGKRKRESDMVRRWGSPSKHRPNILLRALDLQRGDNRPDPNRKEHTPTGGVIPLLWSPRQIPKTTSETNPDCPTFLASYCLF	NA	NA	NA	No differential expression	Not secreted	NA	NA	NA	NA
Lactarius akahatsu	Lacaka1|MSTRG.6852	957	100	MTEESLARSSQSARDQDLCKADLRAAEEVNRRLEAENLQLIEYVRKKAIVVAQKRALLERMQQQYAENERLIASLGIPVRRDSQGHPVCECERCSTIQYT	NA	NA	NA	No differential expression	Not secreted	NA	NA	NA	NA
Lactarius akahatsu	Lacaka1|MSTRG.6976	1639	100	MFVHRPTTGGFKHIGGCDRPKDQPDVVGIRHELHYLHCKSAVSAGASDKRGKGDAMRTVAGSRVRSSRLPRCQFRVSLCSPTRRIKLVPLPLSARIRERH	NA	NA	NA	No differential expression	Not secreted	NA	NA	NA	NA
Lactarius akahatsu	Lacaka1|MSTRG.8924	1478	100	MSAEYYLQFYSVATETAIYAELWLRARAGNHEASPALTLHEIIFPYRLPDSSPPLYRNEEDTAVDTNMLPFANTTLTPTVTHRSTAPQNHPGGDWIFNHP	NA	NA	NA	No differential expression	Not secreted	NA	NA	NA	NA
Lactarius akahatsu	Lacaka1|MSTRG.9340	983	100	MHRRTNSCPSQLHLFEEGAEVLEEEAQTKTPDLQYPDEEPPIVLRYSLPATKVPASTNHASRPSLELGWNNGASRSSGGATKGHWMENTVLPLTKFRHSQ	NA	NA	NA	No differential expression	Not secreted	NA	NA	NA	NA
Lactarius akahatsu	Lacaka1|MSTRG.1096	2274	101	LIQVRIGALVSLQIQSHIGSLMPLTHPINCLDLESDSSFVSPDSPGKSGNDLREENASHSHLSSACSSLEIITFAYIGVLRGEVHPSRLSSGFCTLVGDFP	NA	NA	NA	No differential expression	Not secreted	NA	NA	NA	NA
Lactarius akahatsu	Lacaka1|MSTRG.11844	3611	101	QNQALSKDEPIDTDAIMQDNQPTQATVAAAAAPKKRPRLDLTVEPRERKRGKSMFGLLVGTLNKAKTEDEARNASEAVRIRASAPLHLIVSDVVPRPKSDS	XP_007310173.1	5.3e-14	hypothetical protein STEHIDRAFT_162476 [Stereum hirsutum FP-91666 SS1]	No differential expression	Not secreted	NA	NA	PF04696.14	Pinin_SDK_memA
Lactarius akahatsu	Lacaka1|MSTRG.3249	2304	101	MMWRASSPLTEDAHLLRVACQYGCGTRSLLNWEETYCYPHFLLIGSSLDDFHEKVPDYATMLSWNELESADITSQLIVSGSPKVARRDATIPYDSLDQVLF	NA	NA	NA	Induced during mycorrhization	Not secreted	NA	NA	NA	NA
Lactarius akahatsu	Lacaka1|MSTRG.4223	3193	101	HIQTFSPGTKHLVLLCLGADIAFLSLPSNPNVKLNGKPRRECLRVTMVHGDIVVLSGSQFKASAVCTCCVRTHTDTPWQFSTIRTGMCMCKWHYYRNIISP	NA	NA	NA	No differential expression	Not secreted	NA	NA	NA	NA
Lactarius akahatsu	Lacaka1|MSTRG.4313	1564	101	MFSVDLNNDDSDRTITTTTTTATTTGDYVLGPSLGNGNHDNGNEVTAMTATTTMSTEIPRPGEPRWLRGDHTMGDGDGNEVPRGNDDESFGSMIASEYIVI	NA	NA	NA	No differential expression	Not secreted	NA	NA	NA	NA
Lactarius akahatsu	Lacaka1|MSTRG.4349	1514	101	MFSVDLNNDDSDRTITTTTTTATTTGDYVLGPSLGNGNHDNGNEVTAMTATTTMSTEIPRPGELRWLRGDHTMGDGDGNEVPRGNDDESFGSMIASEYIVI	NA	NA	NA	No differential expression	Not secreted	NA	NA	NA	NA
Lactarius akahatsu	Lacaka1|MSTRG.6252	1371	101	MKFPFFFLAPECPLIKFSASVGKRCNHSQARLKIMQVGKVAQATPIYLYLLVLSLSHHSAAAHRYIITATQQMHSDSSFLQLIVDEASRITAARGSKKVEA	NA	NA	NA	No differential expression	Not secreted	NA	NA	NA	NA
Lactarius akahatsu	Lacaka1|MSTRG.6263	1128	101	MADLIRQDPRMPDSRIFHAPDGLQYRWRSSTNSHDIVLQDPNNNVIAFVRPTRPTRYQLGDVYAELHFVRSAGAGIVMHPPFMDMVTVTAMLYRFVSAFNL	XP_009543988.1	4.9e-36	hypothetical protein HETIRDRAFT_449818 [Heterobasidion irregulare TC 32-1]	No differential expression	Not secreted	NA	NA	NA	NA
Lactarius akahatsu	Lacaka1|MSTRG.6275	383	101	SSIIQDAIALREAGLASVAYFYFDFRDTDKQSRRDLLLSLVYQLSARSDPCCEILFRLYVIHDNGAEKPGDGVLVGCLKEMLAVTPPLALVRLGHERAFTT	XP_007304284.1	2.8e-07	hypothetical protein STEHIDRAFT_97305, partial [Stereum hirsutum FP-91666 SS1]	No differential expression	Not secreted	NA	NA	NA	NA
Lactarius akahatsu	Lacaka1|MSTRG.7096	930	101	MEVYPNQGANHLVSSPKRSVVGIPVKPVFPPRSVPDGQWRRTFILHPLRPTSDSDSEQTPLLSQVHEDAPPKRIRLPTFQLLIFLSIRLTDDMTSHPTSTR	NA	NA	NA	No differential expression	Not secreted	NA	NA	NA	NA
Lactarius akahatsu	Lacaka1|MSTRG.7144	305	101	NRHAATIDILPDDILREIFAIRLSKPYKHPARHMRVWQGLVHVCQRWRKIIYASPRYFDLHLYCSNAYGLPFRKDLSLWLEFPLIIQYYIECDEDDLIAAL	NA	NA	NA	No differential expression	Not secreted	NA	NA	NA	NA
Lactarius akahatsu	Lacaka1|MSTRG.7926	655	101	LARISYKAPYKNACCSCPCSLKSSLYGAGLSSTVCNLSDGTPPKPPPPIDDSTSALDYKTSHKVRPPPLPKMDLPRSRSAEEAVTNILYNTPPPSLQPYKK	XP_009547642.1	2.3e-25	hypothetical protein HETIRDRAFT_385602 [Heterobasidion irregulare TC 32-1]	No differential expression	Not secreted	NA	NA	NA	NA
Lactarius akahatsu	Lacaka1|MSTRG.10463	2970	102	MFKPRVVYPPYIPCISCQNLRGDNGSIGVGTITVEMNAEWQWNPAHTARRRLLVTTQLYKPFSTFFTPLSITITIISPSSRFYASSHVSNKEGSQLGLHEKS	NA	NA	NA	No differential expression	Not secreted	NA	NA	NA	NA
Lactarius akahatsu	Lacaka1|MSTRG.11496	1418	102	MVTKVLPSAPLLLCLDDDDDNDDRDRDDYDNIKPVVPTERFLPLRQLFGLPVTIAKTQDEFIERLLSHQTLSARQIRVTGLRQRVTGVPSVNCIATCTVIHI	NA	NA	NA	No differential expression	Not secreted	NA	NA	NA	NA
Lactarius akahatsu	Lacaka1|MSTRG.11859	1314	102	MRGAGHRHWIAVDELDGVDENHPFVAVSLRRRRARKQSENVLLRQDGAFLPYIAKPAGILASKMPSSGKPASDETWPRRTASSHPARASPPQPFQGVQRCLG	NA	NA	NA	No differential expression	Not secreted	NA	NA	NA	NA
Lactarius akahatsu	Lacaka1|MSTRG.1751	2734	102	MFKPRVVYPPYIPCISCQNLRGDNGSIGVGTITVEMNAEWQWNPAHTARRRLLVTTQLYKPFSTFFTPLSITITIISPSSRFYASSHVSNKEGSQLGLHEKS	NA	NA	NA	No differential expression	Not secreted	NA	NA	NA	NA
Lactarius akahatsu	Lacaka1|MSTRG.3183	1795	102	QDFGDPISWGRFFQLFPNVKVVRLQRGLECEVARFLRQDKEEPVDLLPVLEEIDLMWFPQSTALKGTEAASKLKAFEPFLAARQRSGRPVRLSWSKVLMGYF	NA	NA	NA	No differential expression	Not secreted	NA	NA	NA	NA
Lactarius akahatsu	Lacaka1|MSTRG.3262	4465	102	MSTVLRPRLMSHALQPRLVIFLAFLHRVHAYRRTSSSSAHANLLSLSPRPYMPSPDPFVLSVSSLLPLLSLSHAHSFIFLLRFGLLLILASTIMHGPLQKKH	NA	NA	NA	No differential expression	Not secreted	NA	NA	NA	NA
Lactarius akahatsu	Lacaka1|MSTRG.3978	2522	102	SLILSQNASDHVPSPPDQHATIAASLPRQRAAPVPQPDKQKYNAKPAKHWFVICHPCALYTDTSHDRRDSIASCFLINQDIAIPITAPRYSRRKSGSSTVQV	KIO10626.1	1e-09	hypothetical protein M404DRAFT_969265 [Pisolithus tinctorius Marx 270]	No differential expression	Not secreted	NA	NA	NA	NA
Lactarius akahatsu	Lacaka1|MSTRG.6433	1504	102	MFYRCRRFRRVAVEGFSKSAVQRFHPIQGREALMLALALMKNSSSTLGKHLQRHAGSVMLSVNYHFPPTDSEDDPVVVRIAKQAERLLHEIQPGARLVEFFT	EMD35209.1	2.5e-11	hypothetical protein CERSUDRAFT_116679 [Gelatoporia subvermispora B]	No differential expression	Not secreted	NA	NA	NA	NA
Lactarius akahatsu	Lacaka1|MSTRG.6481	2549	102	ALQFRSTLQTIPLTPSSSLTSTGLTSIVVSLSLRPPRLALEFTLPTLLLGNLGHNFPPSLPPSRPFLLSRARSTRTVRALRVSSDTSRSTFRVRMHWCTQVP	NA	NA	NA	No differential expression	Not secreted	NA	NA	NA	NA
Lactarius akahatsu	Lacaka1|MSTRG.6789	777	102	MSSTCPVTAISPASNFQLIFSTALKAYEKRTKTDLLAHPLASQLQACSSPGSILALLQDQADDLAQARRSDERLTKWLNPTVNVLLAFSATLGEGVSLVGLK	OCH87563.1	2.3e-09	hypothetical protein OBBRIDRAFT_151110 [Obba rivulosa]	No differential expression	Not secreted	NA	NA	NA	NA
Lactarius akahatsu	Lacaka1|MSTRG.7896	495	102	MGHKVTDPACAIGDLWIGESDADVGRQRHRVPELIERSSKIPQTLQARSPTAFAYLFCKRSRLHARIEEVKEAGYEDAFKCPVGTVDYSDWLIKPDFGVLLG	NA	NA	NA	No differential expression	Not secreted	NA	NA	NA	NA
Lactarius akahatsu	Lacaka1|MSTRG.8105	1700	102	HLGGIKPGETTKDGKFTVIEVECQGACSNAPMIVVNDDFYVRHNHVARLATLMLCTGGSYAHDYKGRLRCILEGHKTKPGPQSGRYTSENSAGLTALTSKVS	XP_007321290.1	3e-25	NdufV2, NADH dehydrogenase 24 kd subunit [Serpula lacrymans var. lacrymans S7.9]	No differential expression	Not secreted	NA	NA	PF01257.20	2Fe-2S_thioredx
Lactarius akahatsu	Lacaka1|MSTRG.8786	1318	102	MKRCLIMIHHTLLRELPTLLFMRAFALVASGLGCRSLHTCGRVSSFLAYTGLTSKTHASGGDPSHYYRSDVATSQLGPVCFCTCQGLHFFWTRRRLPLSYPE	NA	NA	NA	No differential expression	Not secreted	NA	NA	NA	NA
Lactarius akahatsu	Lacaka1|MSTRG.9450	309	102	GNNVFAAKGSTATSQSSATLNFIYTQNAAQAPTVAVNVAAAVVNAFYIVNSVHDVTYRYGFTESTFNFQTNNFGKGGLGNDRVTVSVQDPAGTDNADFSTPP	XP_009551928.1	9.7e-32	Metallo peptidase M36 [Heterobasidion irregulare TC 32-1]	No differential expression	Not secreted	NA	M36	PF02128.16	Peptidase_M36
Lactarius akahatsu	Lacaka1|MSTRG.10032	660	103	HEGMVHADVRFALDDVPTSAPDPLFAQRERERVRVDERADARCSRARRASSSCAESPHRRRGTSRRRRARARTATSLSRASSSSSTRRTDRSAWRAASAASSS	NA	NA	NA	No differential expression	Not secreted	NA	NA	NA	NA
Lactarius akahatsu	Lacaka1|MSTRG.12710	3808	103	MVYKSVCDRFRPPLTTRPSWALHTGHPLNEMVRGKPIPVHGFPRVMYIVVVRRFSPHHLVHTLSRSFPPSPRRTPPSNQTVGIEPGTLPERTTRGQTNQLCNC	NA	NA	NA	No differential expression	Not secreted	NA	NA	NA	NA
Lactarius akahatsu	Lacaka1|MSTRG.2644	4252	103	MTSESFIPRLGHMRYDFPSLNSAPLTLPVGLIVGIVVVLVVRYAKSPWRRVPPGPSGFPILGNASKLRDMAWLLGQNCKKQFSMSASPTGHDICFIGGIPQMR	KZV64301.1	8.1e-10	cytochrome P450 [Peniophora sp. CONT]	No differential expression	Not secreted	NA	NA	NA	NA
Lactarius akahatsu	Lacaka1|MSTRG.328	691	103	PDDVIPERSPMLPPIIPETPGSLLSISPISGSSQVDIFDRNIFDAFPDVPSDVPQRPTSYMFPVPPTANGLGNQDFRRSSTTGVPKSERGLNKPDWLRAHQGS	NA	NA	NA	No differential expression	Not secreted	NA	NA	NA	NA
Lactarius akahatsu	Lacaka1|MSTRG.4585	1490	103	VRTLRIEAFFQSLALGNNENIAQWLDLFRVFNCVEQLLIVGDASASFACALQRVSVEMAAGLLPTLREIYLNRATSESRKAVTSFIEKRNLAGLPDITFTSRV	NA	NA	NA	No differential expression	Not secreted	NA	NA	NA	NA
Lactarius akahatsu	Lacaka1|MSTRG.5813	1496	103	MTSQQSRGGGVSTQPPQYICSKTESANSFGSCCTRRGAGYVHPQAMRFSTTFSQQPCPHLSYILRFPTSSSACPAAQWRPQATCRLAVPDGSPDLAAHACSRP	NA	NA	NA	No differential expression	Not secreted	NA	NA	NA	NA
Lactarius akahatsu	Lacaka1|MSTRG.6668	3416	103	MLPVSSPECAAFPYDAAEGGILEVHSGPSSTSTLAFNGKKVGSLAVPEEAITIPLPPTNRPPAKKKVSRWVLWQLWFNTYRYVKITSAQAIQSFRFRVSKPIC	KZV70485.1	4.9e-07	hypothetical protein PENSPDRAFT_442735 [Peniophora sp. CONT]	No differential expression	Not secreted	NA	NA	NA	NA
Lactarius akahatsu	Lacaka1|MSTRG.6790	2428	103	QKPCIIRYMHYGHMCYELFNCTTNANGVYAGVRLALGWEVRRLSAACRMAVLTISSARVRQRGMTLRGGDDRARSAAIISFCEMRMTSTQRIYFVDHNPRTTT	NA	NA	NA	No differential expression	Not secreted	NA	NA	NA	NA
Lactarius akahatsu	Lacaka1|MSTRG.6896	2111	103	MSSALFQPLRVGNTDLQHRVVMAPLTRFRANKDHVHGELAKTYYAQRSSVPGTLIISEATFIAPQAAGYANAPGIWSDAQIAGWKKVCVSPRPPTTVCTEFTT	XP_009550380.1	1.6e-29	hypothetical protein HETIRDRAFT_446181 [Heterobasidion irregulare TC 32-1]	No differential expression	Not secreted	NA	NA	PF00724.21	Oxidored_FMN
Lactarius akahatsu	Lacaka1|MSTRG.6944	3072	103	PSLNSRNYLRKTLNGPRGVVSFTQLKVRTGTTVPWSAQDTTAAGASTDVPKSLPPAFVSSDTSFSDGVIAFDREKYPVPPVAQLGSTSRVEKSDTVYERTGEL	NA	NA	NA	No differential expression	Not secreted	NA	NA	NA	NA
Lactarius akahatsu	Lacaka1|MSTRG.8484	3206	103	MSEWCWMGSTLFNFPNFLCSSLAQRISGFRQHSLVLEKIHSNFDQFGHTHGGHLTRSIAFSFLHLTRTVRYPRWTHGPYARSNFRCFITRVFSASVPVWASPG	NA	NA	NA	No differential expression	Not secreted	NA	NA	NA	NA
Lactarius akahatsu	Lacaka1|MSTRG.9571	680	103	MDSARSRSMSAGRSPTDTLRDLLFKLPGGSGTEITRDMEGIERIRDAPAQGGKPPDQMSPQELHAVLWQVLSFRDSGVFSVCHQIISNQPSNVSGKEDRDDDW	XP_009549683.1	6.6e-28	Het-C [Heterobasidion irregulare TC 32-1]	No differential expression	Not secreted	NA	NA	NA	NA
Lactarius akahatsu	Lacaka1|MSTRG.9577	2615	103	MGAAQTTTTPAATTTTTATSIGYIDPDPAAIEFLLIHICNGAIGFVFRRKCYESETTGTTGVTVTHYVCLEGEDRVKKRSHYYALFMQSKPRTSRTCPNSPKA	NA	NA	NA	No differential expression	Not secreted	NA	NA	NA	NA
Lactarius akahatsu	Lacaka1|MSTRG.9638	4185	103	MGCPQFLVCFRVHESISRENQRVGQLCGKYGESGASGARIKERHPPCICRGRTLYPDATFPPLPMIPVTPLTVGGVPEFPHCNNNSIVIRSYSRLLLPSTSET	NA	NA	NA	No differential expression	Not secreted	NA	NA	NA	NA
Lactarius akahatsu	Lacaka1|MSTRG.9711	1095	103	MFDSTLDAVTPSALSTIASSLSPGARQRGSSSCAKSMKARRWPAAPRPAKWKIMDASMGVKSECREVDAAWFRNSVWSMRPSLDFAVASCNTRSIMSISAWLW	NA	NA	NA	No differential expression	Not secreted	NA	NA	NA	NA
Lactarius akahatsu	Lacaka1|MSTRG.1692	7243	104	MHQHKTDIQGAMNWVDDRHKELEAKFMDLYENKIPKFGEPVDTELARYVDGIGNWVRANDQWNFETERYFGKEAPEVGSTRWVTLLPKEQPESIDTMLVDGPSS	XP_009550159.1	8.9e-33	hypothetical protein HETIRDRAFT_446121 [Heterobasidion irregulare TC 32-1]	No differential expression	Not secreted	NA	NA	NA	NA
Lactarius akahatsu	Lacaka1|MSTRG.2973	985	104	PFSFSANMTSAQSDPGGKTPTPSLNPGRWPSASSVSEIPSFLVVFLPRRFGGGTEAEATEGERRPGVSGPVGTPPPAASSSSASTLTSSSRSTSMFQSVSYSMT	NA	NA	NA	No differential expression	Not secreted	NA	NA	NA	NA
Lactarius akahatsu	Lacaka1|MSTRG.4295	2565	104	MGWHELVRCSDTRRTQFYPMQQEGYGTGAPTSLSALTVQTPYDTPSIPANKMAVFAFQFDGRVHQPPVVEQICDGCNQLVFFQRTCWRPHFFRIGISSTTTLDK	NA	NA	NA	No differential expression	Not secreted	NA	NA	NA	NA
Lactarius akahatsu	Lacaka1|MSTRG.5733	8024	104	MDATRIHDGKRVMLKKVLLEEGPHELRISQMFSSGAVATNSRNHCVPLLDVIELPNSGHQLMVMPFLRPFDNPHFQTFGEFVAFFAQVCEVCSFFFSRISYDRC	OCH84104.1	4.8e-18	hypothetical protein OBBRIDRAFT_742165, partial [Obba rivulosa]	No differential expression	Not secreted	NA	NA	NA	NA
Lactarius akahatsu	Lacaka1|MSTRG.6057	1245	104	MSWAHSKGGRRLTTGWLGYLSSLFFHSLVPHQRPYTPFSRDIPQSIAIMRSISFLAILLTLAFSAAASPTINQDKREPAGGGASVVSPPSFLSLLAVLLSSLTP	NA	NA	NA	No differential expression	Not secreted	NA	NA	NA	NA
Lactarius akahatsu	Lacaka1|MSTRG.7245	672	104	AATRLLIKFLLPGATDADKDELLTLYPQDVTQGSPYDTGTQNVFTPQFKRIASILGDFTFQAPRRFFLNNLSTKQKTWSFRTLRIPRLYAQVIVSPTHTSTSTQ	KIP02704.1	1.9e-19	hypothetical protein PHLGIDRAFT_32096 [Phlebiopsis gigantea 11061_1 CR5-6]	No differential expression	Not secreted	NA	NA	NA	NA
Lactarius akahatsu	Lacaka1|MSTRG.8458	7391	104	MGMPDPIPTFAELVTRIRDSYPDFAYLHVIDITDIVITSGGTVTRKSTKFLRDIWGDRPYITNGSYERDTAIEVVEKEGGLVSFGRYFISNVGVDHSLSRRSAH	XP_009546839.1	4.6e-21	hypothetical protein HETIRDRAFT_427371 [Heterobasidion irregulare TC 32-1]	No differential expression	Not secreted	NA	NA	PF00724.21	Oxidored_FMN
Lactarius akahatsu	Lacaka1|MSTRG.9449	3145	104	MLCKEEAKSAAAATGPTARWVETTVCERPFRAPRDRLCGAAEETNMNTEPSKNTVDANPQSGLTEQLNPMSETDIATSCSTISGHTTLAVPESRASMFSNGNRA	NA	NA	NA	No differential expression	Not secreted	NA	NA	NA	NA
Lactarius akahatsu	Lacaka1|MSTRG.951	5736	104	MSNYSSTVSFCSLVIHHFSRSGHGSSLVPFSLYTARFYVPPLRLVLRSQNMGMLRPEKSWRPIITLEVDGQHKHEVMLGVDGQNPNQRDIMLLYVPPSCSWLVI	XP_007307379.1	6.2e-10	hypothetical protein STEHIDRAFT_170556 [Stereum hirsutum FP-91666 SS1]	No differential expression	Not secreted	NA	NA	NA	NA
Lactarius akahatsu	Lacaka1|MSTRG.10566	1455	105	MALAIDAADALLATGTQLHPTSLGPHAANVVAHLSSLPQHVCAAAVFSRFSSRTILPDLYFQHIRTSVSHAATDLTRFVGRPFADKALNILRALEPAYAEPPVAR	NA	NA	NA	No differential expression	Not secreted	NA	NA	NA	NA
Lactarius akahatsu	Lacaka1|MSTRG.11957	5883	105	MTGMAEYTYGGPPYSTVSRPYSPPLSVYPSALEMASSGTSRSSGSGSYSSDLTSVPRSMRYNPIGVAPSVVRSGRGRNGRPKKHGDPTNVRDPIPAHDHAASHSL	NA	NA	NA	No differential expression	Not secreted	NA	NA	NA	NA
Lactarius akahatsu	Lacaka1|MSTRG.2378	843	105	VAQASSDNDDRLVRIETRPSSIERQREGLGAIQLAQQERKRMLVGMRRHQGFASSLRSGFSAASSTRPLVPSPLAYSASTKYAWRGNPYLVCTSPIPFSQELMDC	NA	NA	NA	No differential expression	Not secreted	NA	NA	NA	NA
Lactarius akahatsu	Lacaka1|MSTRG.3672	318	105	STPPTLHIHPVSSVPTTPLSAVQTMMSSLPLPVASQCAPSLPAPHLRVSPGAHMPASMPAPATQIAANHTTYAPASVSSYGGLAPAPPPARYSSPTLPERLHRPP	NA	NA	NA	No differential expression	Not secreted	NA	NA	NA	NA
Lactarius akahatsu	Lacaka1|MSTRG.5598	2823	105	MQFQLFESDPISPSYEAKRILLPDQVDQSSISDGQFSWPFVFSPPPALSSPESSPAASGRADSSLEQQSTHDHRGKPNVQLIVTICCRGRLTRDILFVLSIPHFQ	NA	NA	NA	No differential expression	Not secreted	NA	NA	NA	NA
Lactarius akahatsu	Lacaka1|MSTRG.5812	1518	105	MLILTMRTSSSFSPSESYERALFSVGVAATIGVRVFINIDPANREDRLADTIDVFQEITFISSLLTNILGTGIISLKAWYVWGFWICTALLTLGLAALGGIEDGL	NA	NA	NA	No differential expression	Not secreted	NA	NA	NA	NA
Lactarius akahatsu	Lacaka1|MSTRG.6908	3516	105	MPSVRWIPLTEPQLLIHYFLFLVALGRIVLRPFTLSNGVTVPAGTLVVVPSAAVHMDEEFYPNPEEFDGFRFAKLRERDGVTVAGHQATSTSTEYLAFGHGRHAW	XP_007261412.1	5.9e-16	cytochrome P450, partial [Fomitiporia mediterranea MF3/22]	No differential expression	Not secreted	NA	NA	PF00067.23	p450
Lactarius akahatsu	Lacaka1|MSTRG.7265	2398	105	MRRHNTSRAGVFSSCMSLLSPLRPVPTILASSLLWAALSSIAEIPALFAQRPIVVKHAKAAMYHPFIEAAALTIVDVPITFVTIIVFSLILYFMVGLQASASQFL	XP_007303466.1	3.6e-21	hypothetical protein STEHIDRAFT_146669 [Stereum hirsutum FP-91666 SS1]	No differential expression	Not secreted	NA	NA	PF01061.25	ABC2_membrane
Lactarius akahatsu	Lacaka1|MSTRG.7285	2886	105	MQFQLFESDPISPSYEAKRILLPDQVDQSSISDGQFSWPFVFSPPPALSSPESSPAASGRADSSLEQQSTHDHRGKPNVQLIVTICCRGRLTRDILFVLSIPHFQ	NA	NA	NA	No differential expression	Not secreted	NA	NA	NA	NA
Lactarius akahatsu	Lacaka1|MSTRG.954	2744	106	MKTNGVLGFERAVLTALSDHRLLNGPITKPSGTTSTPSLQKYIPEPWGPSRAEFLGGSPSTRAQDKEVGDGPFRLTFNYPVHVNDPLTKWIRLRRTLRHLSSFTSL	NA	NA	NA	No differential expression	Not secreted	NA	NA	NA	NA
Lactarius akahatsu	Lacaka1|MSTRG.10640	906	107	MFCDALYSLYSAHKKGSEQPTNDSLSQCLKYMLTTAGPVPIYLILDALDECPYGSGLPSPREKLLDLLDELVKLRLPTLRLCITSRPEFDICTVLEPLAAQQVSLHN	EMD36623.1	9.5e-22	hypothetical protein CERSUDRAFT_124368 [Gelatoporia subvermispora B]	No differential expression	Not secreted	NA	NA	NA	NA
Lactarius akahatsu	Lacaka1|MSTRG.11893	8441	107	MTTDTDGIVESHEEGDEMPATLMGTTRDQRTKFHVKFKFIALKLLGGWCRLYSLREWPKRRQTVWTKDPMHLECRTDPRISFGTSEVQLVRLTELFLINLVDSIANV	NA	NA	NA	No differential expression	Not secreted	NA	NA	NA	NA
Lactarius akahatsu	Lacaka1|MSTRG.1987	5166	107	MRRIVRFRRRSPMSFATARFYALHVRCSLLVRCLPRGDFAFLDRLRTIISYDRICVLDNGKIAEFGVPEDLYAQDGIFRGMCEHSSITLDDIRRARKEREAGDEIAL	KZV72596.1	1.4e-17	ABC transporter [Peniophora sp. CONT]	No differential expression	Not secreted	NA	NA	NA	NA
Lactarius akahatsu	Lacaka1|MSTRG.2725	9552	107	MEKTSARLPKMATNHIWNATLYCSEGTPVKIYLSCWPALPIAMRYRVPDGEDDVLTLLKHSNRVHVVKLAVSSQRGNVVTAMQELFSVLTHLELNLLRGRGCTSLSL	NA	NA	NA	No differential expression	Not secreted	NA	NA	NA	NA
Lactarius akahatsu	Lacaka1|MSTRG.5355	1899	107	MSLCIFPPHWQAKKPYSRSPFICSIVHLPLSRRNFILSFRTRILNSDLWARPKMLLQRTAACRHSVSEEKEAPCRRLPPLDRHIDASGMNKGATQASSENPQFSELA	NA	NA	NA	No differential expression	Not secreted	NA	NA	NA	NA
Lactarius akahatsu	Lacaka1|MSTRG.6709	511	107	THNVAMAYPIADYVVSLGLDGRITSHGSVSDAFTKDKTFAKGLAESSCAIKGDGTKIVVEEPDKTTGRVDGKLILAEESAYGHVGWDPSERAIPLFPFCLKFIDASY	XP_007298897.1	5.8e-19	hypothetical protein STEHIDRAFT_127305 [Stereum hirsutum FP-91666 SS1]	No differential expression	Not secreted	NA	NA	NA	NA
Lactarius akahatsu	Lacaka1|MSTRG.6906	3287	107	MVLVSGPELVEDVRKAPEDVLSVKASTAEVGILPGMLTWMLDSYSSRLCQLFQLEYTLGLFKTNRDYHIDVIRSKLTRNVAATFKELRDELIRSFDASIPVHGDGAW	EGO05195.1	6.4e-10	hypothetical protein SERLA73DRAFT_157811 [Serpula lacrymans var. lacrymans S7.3]	No differential expression	Not secreted	NA	NA	NA	NA
Lactarius akahatsu	Lacaka1|MSTRG.7271	5012	107	MLTYLCPGCFDILSNAVDSKFLRDTEALGAVRKLDQGPPCATLLDRLMAFVFWFIAAREKYSTASGLKACGEAGHLTGGSIDQMALLKVLKSEMQLSRASIKTEYVP	NA	NA	NA	No differential expression	Not secreted	NA	NA	NA	NA
Lactarius akahatsu	Lacaka1|MSTRG.9439	4763	107	MKRYCFYRIACVQRIDTVTVTAPVIIFDLYWQLCLLSSFPWLEDRRGDSASRLPFLRSLIPHSSLIRYLDLRRCPSDKPSPRSRLTRLCLGSGAALSNTPSLALGSR	NA	NA	NA	No differential expression	Not secreted	NA	NA	NA	NA
Lactarius akahatsu	Lacaka1|MSTRG.9703	811	107	MVPFSSDRKSMGCVVRLPDGSHRLYIKGASEVLARKCTRHVVAYRDSADKALGSNQVETVPIGEMEEDNISRTITFYASQALRTIALCYRDFPHWPPPGTRLLDKNE	XP_009544711.1	1.1e-30	P-type ATPase [Heterobasidion irregulare TC 32-1]	No differential expression	Not secreted	NA	NA	PF13246.7	Cation_ATPase
Lactarius akahatsu	Lacaka1|MSTRG.9858	2778	107	MKYCTVKENTKLSGTQWFAYRLDVPLAPAFALRRLAILPIRLGIHLVAARTSLLRGPLHRRGPPFRYIYPKQRHDTRESNENGQDWERLPVVSILVDDHLDHIRSNN	NA	NA	NA	Induced during mycorrhization	Not secreted	NA	NA	NA	NA
Lactarius akahatsu	Lacaka1|MSTRG.10505	1201	108	MQGKTLGVAVGIFDEEGKDISETGVAGELVCTRPHPSVPIRFWGDDARGTKFLNAYYDTYPGIWRHGDFMAMNPRTKGYMILGRRFVSSSLLRLSLVEVLMLVPVTVC	KZV69340.1	1.6e-29	acetoacetate-CoA ligase [Peniophora sp. CONT]	No differential expression	Not secreted	NA	NA	NA	NA
Lactarius akahatsu	Lacaka1|MSTRG.11632	1299	108	MNKWPLPNSVLVVDNASIHKVAGIRELVEEHGARLLYLPAYSPDFNPIELAFSTIKAWLRTNRDRMNRELELVDGMVYKVFWEAVHTVTVEHAKGWYKHCGYTDDDDN	OJT10703.1	1.1e-25	hypothetical protein TRAPUB_12796 [Trametes pubescens]	No differential expression	Not secreted	NA	NA	PF13358.7	DDE_3
Lactarius akahatsu	Lacaka1|MSTRG.3697	1279	108	FLFPPFPFHPSFPFPPFHFSTLPSHSSTLLLPLHANFEDANIRATFFLFLFSRSSLTGAGRRIGAASSQRPPSLHTSRHASTRPASLPLPPLNLPLTRAIPLSPSRDP	NA	NA	NA	No differential expression	Not secreted	NA	NA	NA	NA
Lactarius akahatsu	Lacaka1|MSTRG.5201	325	108	LFLLMNAFPLNPNSNTLTSFQSTMSNFQLILDAVDKYADQTGINLKENPFAAKINACDSPDAVLLLLQENLKAFKDYRDKNRKFIDCLGPVVQFVHFFSGILAEAAGL	NA	NA	NA	No differential expression	Not secreted	NA	NA	PF17109.6	Goodbye
Lactarius akahatsu	Lacaka1|MSTRG.6264	2295	108	MAHYDIFRHHLAIKYPAYGHALWEPSPGGRYPAVAVGDVGFIREGQFHRLFNVLLSPRDPSHRLGIPEENEQLRPRVEDHIIPGTLSPNHFCSAGVALESEPEVFATG	KZT19859.1	1.4e-12	hypothetical protein NEOLEDRAFT_1077003 [Neolentinus lepideus HHB14362 ss-1]	No differential expression	Not secreted	NA	NA	NA	NA
Lactarius akahatsu	Lacaka1|MSTRG.7254	953	108	MGQVGGVLVPISLFWLAFTTYRGIYWIVPVLASVPFGTGTYFIFTSSFTYIVVAHRSIASFALTCNTTMRTTFAAAFPLFAGQMYDTLGTVGATALLAGMTTAMAPLP	EPT01658.1	9e-36	hypothetical protein FOMPIDRAFT_1036148 [Fomitopsis pinicola FP-58527 SS1]	No differential expression	Not secreted	NA	NA	NA	NA
Lactarius akahatsu	Lacaka1|MSTRG.10714	327	109	VLLSVNWHTEQFVAGIINILKHPECVLSPVTYYASLPLHTKSFSSCLQFHAAYIHAAVHIRLWCCHMPARRLASRPITRGSRVISCKAIRCQPHLVRSFFFFLDKLSAM	NA	NA	NA	No differential expression	Not secreted	NA	NA	NA	NA
Lactarius akahatsu	Lacaka1|MSTRG.1483	3916	109	MGEGLHLAHGERASLVRSARNALDAEGFLDVPIIVGTGGGSTRETVIFCEEAATAGADAVIVITPGYFAGVLANHRRALKAFYVEVAEKSALPVLIYNCLFAITHRFMD	OCH85422.1	3e-31	dihydrodipicolinate synthetase [Obba rivulosa]	No differential expression	Not secreted	NA	NA	PF00701.23	DHDPS
Lactarius akahatsu	Lacaka1|MSTRG.5115	4288	109	MNAKVTLLAALGLLLLNHVRFMLVVNEVDNRRPRVPVVDIVTKAGGVDDCKLDLELLLLELGLDDLDFSEFVELLMVATAIVFGRGQLGREKGIDESGLSQTRFACTGT	KUI52641.1	6.8e-07	hypothetical protein VP1G_10488 [Valsa mali var. pyri]	No differential expression	Not secreted	NA	NA	NA	NA
Lactarius akahatsu	Lacaka1|MSTRG.7260	1280	109	MSDLQEVAQRDQSVSSLPPAPEDAQVTDPPLIAPPVTGPHGGSSGSHVPVGYFDEEGVGQLRRTLTHLSESALGPGTPGTVLSESCETLSVPATGPFDFEKTLRTIMKR	RDX52640.1	7.5e-06	pleiotropic drug resistance ABC transporter [Polyporus brumalis]	No differential expression	Not secreted	NA	NA	NA	NA
Lactarius akahatsu	Lacaka1|MSTRG.7276	7333	109	ALRHSKVKLTWDQDDPERDRVTRRTLSLKDIDGDDFRAYIASSSDEEYEGEAKTMKKSIDRDKLRALLLEGSNHDLPEGWAGSKPNDLGDDGDVDMEVTFRPALTGGKG	XP_007297944.1	4.8e-29	hypothetical protein STEHIDRAFT_45902 [Stereum hirsutum FP-91666 SS1]	No differential expression	Not secreted	NA	NA	NA	NA
Lactarius akahatsu	Lacaka1|MSTRG.8454	5973	109	MKDPFACTASVIYRNSLNRYQRRSVSANQFPRCDLLVGPDAGDVGVSACLRGNDRSFGDGESAGDAGALLVVFEAELTEDVSLVGAGSLHGSQDDSVLQVGVADLDGLE	NA	NA	NA	No differential expression	Not secreted	NA	NA	NA	NA
Lactarius akahatsu	Lacaka1|MSTRG.10668	1148	110	MHKFEDTQAVRSTCDVSRLQAYYLWKSQLPRPCPPRHTRFPATALVQTTGECPSPIEPFVLSDLENTHSVTPLFLCLILTLFDSRSLFLANINKYCANFSCFPSKNGQGQ	NA	NA	NA	No differential expression	Not secreted	NA	NA	NA	NA
Lactarius akahatsu	Lacaka1|MSTRG.2729	1901	110	MDVSAGDPRDAEIFRAKAPRHLATTSYLVHAVLQELRLNPTIFGDDTGDHWSGHLVYEKPDSLVLFFFLPSSGSVLAFVSTCRESLPVFVRGGALNAQPPKTVNWETSAY	NA	NA	NA	No differential expression	Not secreted	NA	NA	NA	NA
Lactarius akahatsu	Lacaka1|MSTRG.3130	2759	110	MNVYDTTGQDPRSRRASLGTQAASSSRSIFHALVARTLLCPHSCSISVIVDVDVTIAFSAAFFVNFMVCGARPAAESPTSPSLRSRTMIINNAARAFSLAAPSCAAAPVR	NA	NA	NA	No differential expression	Not secreted	NA	NA	NA	NA
Lactarius akahatsu	Lacaka1|MSTRG.4754	767	110	MAYDIYFFSSPVIIWSLVLHTLIFRAHLTSLQALILIFKHATFLRLDGLSSESALTRAELDYREANIDLKIRQHLTGSSQDSVEVSASFLMATDIGSFTLASVKLISSCF	NA	NA	NA	No differential expression	Not secreted	NA	NA	NA	NA
Lactarius akahatsu	Lacaka1|MSTRG.542	330	110	DVPVVISNGDGEAGKSTQPVTLYLTIAVSSDATSPIFSNTPEKLTKGDNFTDEEPTKPTPVQAEMSSAEEALIALHRADDTKKLIDRRDIWKGAVTRIKWVMDTVSPIAE	NA	NA	NA	No differential expression	Not secreted	NA	NA	NA	NA
Lactarius akahatsu	Lacaka1|MSTRG.5810	334	110	CISIGTRHMSGSGSWRMVVGLGFIWPAILAIGIQFMPESPRWLASRGDLEKAQRALAVARGIKASEADANYHLRREAEGIRASIEHERNVRGGWLDCFRVENKTLYRTLL	XP_009551184.1	3.5e-35	MFS sugar transporter [Heterobasidion irregulare TC 32-1]	No differential expression	Not secreted	NA	NA	PF00083.25	Sugar_tr
Lactarius akahatsu	Lacaka1|MSTRG.7284	1873	110	MAHYDTFRDLLGIKYPAFGHALWEPNPERLYSPVEVGDVGYIREGKFHRLFNALLPADHPSHQRFRVPEHYEPLRPSVADHIDGGTLSPTDFCSYGVTVASGGLDVFARE	KZT19859.1	2e-14	hypothetical protein NEOLEDRAFT_1077003 [Neolentinus lepideus HHB14362 ss-1]	No differential expression	Not secreted	NA	NA	NA	NA
Lactarius akahatsu	Lacaka1|MSTRG.8754	887	110	LDLPDKPHIFPVFHTSEVRPFMENDSVLFPQRALVPPDPITIDGHDEFFIDKIVDQHRCGRGTQYRVRWRGEGPEGDKWLPAKELEDCEALDNWLQHQNHEEFSSAELLP	XP_001887224.1	7e-28	reverse transcriptase-RNase H-integrase [Laccaria bicolor S238N-H82]	No differential expression	Not secreted	NA	NA	PF00385.25	Chromo
Lactarius akahatsu	Lacaka1|MSTRG.8968	854	110	EHLMALTFPEFMKQFRACWLPLNWEQAVRTQMLNSRLDPSQCFDEWSDQILSYNVSLRNTTSHMSDAQLRIQLEAALDEELRTMATDEKLDEVIDFHEWMNKVTRIDNRP	KIJ90275.1	2.5e-09	hypothetical protein K443DRAFT_135691 [Laccaria amethystina LaAM-08-1]	No differential expression	Not secreted	NA	NA	NA	NA
Lactarius akahatsu	Lacaka1|MSTRG.9355	652	110	MASYNHFCFLQHIRNSAFPRVNSSAVLPSAEGSLRDALAETCYFYAQNLPTVVTLLPRAGLALALLLSFFSPEHLPGGLSLSDVDQSIARRDGTFFNKSTGSLSGYAKVC	XP_007306042.1	4.4e-38	hypothetical protein STEHIDRAFT_122829 [Stereum hirsutum FP-91666 SS1]	No differential expression	Not secreted	NA	NA	NA	NA
Lactarius akahatsu	Lacaka1|MSTRG.9632	1309	110	MTHYNTFREQLAIAHPAFGYALWEPDPGDLYPPVEVGDVGFIRQGKFHRLFNALLPANHESHQRFGVPERFEPLRLSVPNHIDRGALYPNNFCSYGVSVESGGSDVFAVA	KZT19859.1	1.5e-14	hypothetical protein NEOLEDRAFT_1077003 [Neolentinus lepideus HHB14362 ss-1]	No differential expression	Not secreted	NA	NA	NA	NA
Lactarius akahatsu	Lacaka1|MSTRG.3128	3445	111	MRSSLSHTVARGLSARVYAVRAPPTMIFLCHGARALGAELPTTGSESHRHALSYLVSIYLFISFVLQLGCAGTDGKCLPVGRQALALSLSKYCLLQEARGGAFPPCLAWPA	NA	NA	NA	No differential expression	Not secreted	NA	NA	NA	NA
Lactarius akahatsu	Lacaka1|MSTRG.5446	738	111	MCPSRSFNLLRCFSRRRPPIGTTALRSSAPPPSMRNVSQGGIYLVNSEGFGRSLQTCVLIVGLPAEVDRLKHEGDAASQTEVESHSFKSHNHFLELLQVDLIIRGIVCGTV	NA	NA	NA	No differential expression	Not secreted	NA	NA	NA	NA
Lactarius akahatsu	Lacaka1|MSTRG.6970	2079	111	MSYDLDLPVCRCVPMPFPRVSLSVKPREQSQLSVAPEYDGLPHVREYISSLRFHHHRVTCRLAHRPATTRTLPRQFHSPASAGGRCVEDVELSVGILFTFSGRSLLATSQA	NA	NA	NA	No differential expression	Not secreted	NA	NA	NA	NA
Lactarius akahatsu	Lacaka1|MSTRG.8590	1924	111	MSGAAHPTHELHRGDVPYEAPFVRSASPNDSLTTAYGADETSLSDVELSEDLFSAKVLGELRIHEKREEEERAETRPLLMPRPRRGAASNGDEKGVDDPSRSCAMSHDSYN	XP_009551052.1	2.4e-12	hypothetical protein HETIRDRAFT_242588, partial [Heterobasidion irregulare TC 32-1]	No differential expression	Not secreted	NA	NA	NA	NA
Lactarius akahatsu	Lacaka1|MSTRG.8698	2693	111	MVSRQFSKDDEESKRFLNDDPAVKSLLENAKPLSTVNFSDYLAIFYVGGHGPVIDLAIDEVNIELANKVRLNRIRRSSAAEIAFSSTAPGRLSVPYVMALRECQSVTLLRA	XP_009543568.1	2.2e-13	hypothetical protein HETIRDRAFT_472133 [Heterobasidion irregulare TC 32-1]	No differential expression	Not secreted	NA	NA	NA	NA
Lactarius akahatsu	Lacaka1|MSTRG.8984	1077	111	GFLRQWPSLPTFGVFLTTRVLPVPHVDDVDRYVVSRVEVLPGFYGVAQFLGFRDEAALRMDEIVARIGALEERYAEADENKHAAVHRRVAQLQELARHPTHMCVPPTLLCW	XP_024341367.1	4e-15	hypothetical protein POSPLADRAFT_1073955 [Postia placenta MAD-698-R-SB12]	No differential expression	Not secreted	NA	NA	NA	NA
Lactarius akahatsu	Lacaka1|MSTRG.9859	4232	111	MANREEFARTFDEVTKDQTESEGEKAVDVEDANENIKKRRAAKRSAQFMQAEERNTGAVNVQVYKQYILSGNGMVQVRVMSVVARTVRLFTMPNSALAHCHNSLFGPEVSP	NA	NA	NA	No differential expression	Not secreted	NA	NA	NA	NA
Lactarius akahatsu	Lacaka1|MSTRG.1921	1736	112	MNKRLTAQPHTCRSDASMSHQITLSILDAYFPRVYTLQDYLNRVLIPPEDTDINDVLLLPSDPPSYSQFLARSYVTFGANTTSPLAQFDATTSFDPMRVVRVLSMSCLNQWY	NA	NA	NA	No differential expression	Not secreted	NA	NA	NA	NA
Lactarius akahatsu	Lacaka1|MSTRG.1971	3223	112	MAFCLRDQRSDSMTQRLKCSTLKALNVNAHSSSNLTNKYDLLQSGKNPKENLHLNLTWPKAQSNLKGTNVLGSRSCEPRNMLTSPSPRTTAVFFALFLDLTLASIFPPFAVC	NA	NA	NA	No differential expression	Not secreted	NA	NA	NA	NA
Lactarius akahatsu	Lacaka1|MSTRG.2021	1783	112	MHVQVRRTPFFLLSPSFSSAFEEEVGSTTGHTMPPRLSKPSIPVYISRQHRLGRRVCCLACCVPVLSTTAARGGCELENKIYAASGCRLPPSFLPSHPGVAHLPHDRCALRV	NA	NA	NA	No differential expression	Not secreted	NA	NA	NA	NA
Lactarius akahatsu	Lacaka1|MSTRG.2672	1274	112	RLRRGIADTMARIKNSVWRMSQGNIYQRVQMVIQREDDHTLWVSNADLRAEMQYALDLPHTPPQYNTTCRWCLLNTHDAAHCLTFTQCPIARSLDIAGKTAYTLTASAGSNA	NA	NA	NA	No differential expression	Not secreted	NA	NA	NA	NA
Lactarius akahatsu	Lacaka1|MSTRG.4757	1615	112	MTFQYSVQGKLEHHNRQSPTRSVPPALFFFWSTYFPAVFGFFARHPPQLEQLLWTRKRSHDDAVRANGDTAICFSTRQQIPMTVEERHRLGSSCCRLQHTALPMAPPLQRVS	NA	NA	NA	No differential expression	Not secreted	NA	NA	NA	NA
Lactarius akahatsu	Lacaka1|MSTRG.9451	6240	112	MEVYPNQGANHLVSSPKRSVVGIPVKPVFPPRSVPDGQWRRTFILHPLRPTSDSDSEQTPLLSQVHEDAPPKRIRLPTFQLLIFLSIRLTDDMTSHPTSTRHDTMLYHVVFR	NA	NA	NA	No differential expression	Not secreted	NA	NA	NA	NA
Lactarius akahatsu	Lacaka1|MSTRG.9831	880	112	RPWHEMVQDFSDCEYRGVRDRQMKELEEEDDLLSKVPVRNLRAKLYKESKEFVRQQRIHCLLQGAWFLNAVPISAPAPRRPARPWRFMRLVRPFPLLTFTRSPVLKNGGRCV	KIM90497.1	4.6e-35	hypothetical protein PILCRDRAFT_84480 [Piloderma croceum F 1598]	No differential expression	Not secreted	NA	NA	PF16457.6	PH_12
Lactarius akahatsu	Lacaka1|MSTRG.11299	895	113	MPEQSYPKRIKELDELNSMKVNKLIQGSYEGPVQLRVVDSGNEWEGGSLLQKAPVVLLCELGKHVLTTTSLSLGAFSAAISNRLSALDGSIEGGMITTTFRLEYRKLCDQKVA	NA	NA	NA	No differential expression	Not secreted	NA	NA	NA	NA
Lactarius akahatsu	Lacaka1|MSTRG.12457	3529	113	MSLKGIADIPVALCESPSITDSRFSTPFLHPPIGLDSRIDVNNAFDWLRREEEQNGINDIGVSLRATGDAHHGCQVPDVVAKVVAWDLVMWVTRNSGSDLERTLLIILVVISV	NA	NA	NA	No differential expression	Not secreted	NA	NA	NA	NA
Lactarius akahatsu	Lacaka1|MSTRG.1698	543	113	MLKSLWRFARAYIELGNSISLPSYFYIVFTYPVITRRILDEDDITVDVIRRCIGALVVNKLVTDINARALPVNDEELACLSSILGTDGQDVTRLLSHPGAIQFVNMIFLVFSS	NA	NA	NA	No differential expression	Not secreted	NA	NA	NA	NA
Lactarius akahatsu	Lacaka1|MSTRG.4183	2279	113	MRHEIRTPAAPNTWSTVVVVIKNCACNAEEDKIEVHPSHQGTQSTVKNVTAWESARREAPKSTSKSRHERARGPELLEARLLDDLPPAPSGNSPAPWTDSRPPGRHFLACSCL	NA	NA	NA	No differential expression	Not secreted	NA	NA	NA	NA
Lactarius akahatsu	Lacaka1|MSTRG.4466	7251	113	MSLRLQTLSPVTSSRLLLFLLAPPSSTLRYYLLFARKADVQPLTWGYKFMREIARRMPHFRGEPPVLHPSFTPSGPAAIVAHAEGPVSFDAPRIVYSEEDERALEVFVRARGA	KZV59433.1	2.4e-15	GMC oxidoreductase [Peniophora sp. CONT]	No differential expression	Not secreted	NA	NA	NA	NA
Lactarius akahatsu	Lacaka1|MSTRG.5335	2504	113	MIGISIVKCPPAFTRESYGIFYSCMLDPISHVIHESRPRWQTLIVLDHIGEYSRAGTCVGKFHARLAELIRRCEKEEARSNNQEKEDVGSTGKMEHDNAEKGGRRRYVLVIEQ	NA	NA	NA	No differential expression	Not secreted	NA	NA	NA	NA
Lactarius akahatsu	Lacaka1|MSTRG.9582	1653	113	MDVVFFSFLIVSALSVLINWNVFFFWFLHNKKKVFYQEHVAKRVKNSLLLTRHGAGDRVSTAPVNTTSPTAAHVFIRRPFEIGWFTNQVETCVIPSLSLAVPGTYLFPSVWIF	NA	NA	NA	Induced during mycorrhization	Not secreted	NA	NA	NA	NA
Lactarius akahatsu	Lacaka1|MSTRG.10568	989	114	MESPAQSNESQNAPLPPATTTMRVVILGGTGPSGILLIEEALAARHTIVVYARNPQKLPVHLSKHPEITVVKGELQDAAALATALAGARAVLSALGPTFGNPAGEPIAHGYAVV	KII86386.1	1.3e-21	hypothetical protein PLICRDRAFT_700446 [Plicaturopsis crispa FD-325 SS-3]	No differential expression	Not secreted	NA	NA	PF13460.7,PF05368.14	NAD_binding_10,NmrA
Lactarius akahatsu	Lacaka1|MSTRG.10753	1951	114	VRYMIVVNTNFFLVSGTSCSAPVRLTTPLATLRHLSPNIQLTTRMQTAAGIISLLNDFLISEGKNPLGFLNPWLYGRDGGLRGLNDITSGSNPGCNTDGFSAITGWDPVRPARL	XP_018173596.1	3.3e-20	tripeptidyl peptidase SED3 [Purpureocillium lilacinum]	No differential expression	Not secreted	NA	NA	NA	NA
Lactarius akahatsu	Lacaka1|MSTRG.1418	2625	114	MEIAQARRHIFIVTPSQPRTPLYTRDTCQEKYRRPRSPSRSYSLSRFFEGSDEEPLEHPDRVRVFKFRVSCSLSKNMVTVTQWQGLCLALTRLSLGSRPSFLAHSWVEAFHVHS	NA	NA	NA	No differential expression	Not secreted	NA	NA	NA	NA
Lactarius akahatsu	Lacaka1|MSTRG.1919	344	114	DEHPHFLRYATELAAALRHTIFVDRVVYHFTSRAEVLELLEEHITENIVKVQHLPFGAWVMLTAPPDWPRLLSPSNRDTARLGVIVVALLHLLRRPRANPSEVHSRPNERRCMY	XP_012182352.1	3e-13	predicted protein [Fibroporia radiculosa]	No differential expression	Not secreted	NA	NA	NA	NA
Lactarius akahatsu	Lacaka1|MSTRG.4387	3574	114	MTTQEHVIPRTGGTQVVETLLNSSPPEAVSLPPTPATEWWLPHLGLHQHPETLTIPQSRPESVLSNISDFSFSASSLTSGPTEFPLSPATSFLSSTTEFPPSPSASFLSSIWDS	NA	NA	NA	No differential expression	Not secreted	NA	NA	NA	NA
Lactarius akahatsu	Lacaka1|MSTRG.5465	3502	114	MVNNLTSQAATMVTNGIPNDVINNLDPLALIIFIPIFDLFFYPGLRKIGINFSPIKRITAGFILGSLSMVWAAVVQHYVYQVCLEIFFNGVTMLADSSCLHFRPTHVGTKCLLA	XP_008041388.1	1.2e-27	oligopeptide transporter [Trametes versicolor FP-101664 SS1]	No differential expression	Not secreted	NA	NA	PF00854.22	PTR2
Lactarius akahatsu	Lacaka1|MSTRG.6636	1633	114	MDKVTTSSHLMKMAQTGARMPNMERHHIFVVTASQSGTPLYKWDTCQTKSRISLPIVIRFPSSFKDGDEGNILATLEHPDRVRAIVLCVPSSQSDNLLRWHSLSCRTNPPFLNL	NA	NA	NA	No differential expression	Not secreted	NA	NA	NA	NA
Lactarius akahatsu	Lacaka1|MSTRG.7661	990	114	TLPSPHHLVSLLVTLLLRPNMITFPSPVGTHEHPLFLKNDFPRDVVKGPASENLSTILHSTHPSPLLPSSPRDLGACLHPRPLNGPERRSLPRAKARPDFHFILLPFSHPRSST	NA	NA	NA	No differential expression	Not secreted	NA	NA	NA	NA
Lactarius akahatsu	Lacaka1|MSTRG.10493	9297	115	MRVIANSRTRFGAARNFAEMAAGVGVASGSSREGRVRVWRAGEHEGRATPSSEVQKLKGKVYYLKLGCRVSCIPHIPPHVYGHWQHKAKTGGPESSHIFREIVAQLSEIFCLDLA	NA	NA	NA	No differential expression	Not secreted	NA	NA	NA	NA
Lactarius akahatsu	Lacaka1|MSTRG.2950	4019	115	MKDEVKGALLLDVVVRECTSVLELLPAKMRHCWSGKNGSPPEAKNEVKGALLLDVVVRERMSVLKLLPAKTRCCWSGLRKEWLTSTETKNKVKGALLLNVVVGEHPPSSCLCRQK	NA	NA	NA	No differential expression	Not secreted	NA	NA	NA	NA
Lactarius akahatsu	Lacaka1|MSTRG.5718	2286	115	MQTPATNLVVPSPSPPPPLSVPDNMFLSSPQLSSDPPANLSNHTPLPEPRHDMLASVPPCPSTAPDPYDIAESASSAKVDTLIPQRIWLPRTVYLNRRRCHRLRAPRLGIYHGAH	NA	NA	NA	No differential expression	Not secreted	NA	NA	NA	NA
Lactarius akahatsu	Lacaka1|MSTRG.6791	346	115	KQSSSERPIKSLLDVPIHRLMDELSVTTAQRLVQPDTGQSPSSGPSSRTEETLWVDRYRPKRFTDLLGDERVHREVLAWVKQWDQCVFGKGKGKKRARDEERFANLEDESGRPQE	PSS31059.1	1.9e-28	hypothetical protein PHLCEN_2v2391 [Phlebia centrifuga]	No differential expression	Not secreted	NA	NA	NA	NA
Lactarius akahatsu	Lacaka1|MSTRG.10326	1378	116	MHNEQFGARSFPQVRPDARRHPSKHLRRDAHRLSRHEHGLIPKRRDAPNLLPAAAHLLRKLIRDLRVRARLDANRRCLASAASRVACACASASSRVRSATALAAATVEYASASASA	NA	NA	NA	No differential expression	Not secreted	NA	NA	NA	NA
Lactarius akahatsu	Lacaka1|MSTRG.12471	1377	116	MFQRFNGPFSGKHASHRNPEDRLSVHLNLVVVIGDERTTAYVDVQHVLELKPDGAYGANSNLEASNLAPNLLNDRIDDQNRINHVLCGRQTYRHLRADSLPEKRGDPSNLSIVLSG	NA	NA	NA	No differential expression	Not secreted	NA	NA	NA	NA
Lactarius akahatsu	Lacaka1|MSTRG.4886	2789	116	QWGVIGPQRLFSHGQLYYGLVFFFLIGAILPVIQWILHRKFKIAFLRYLNFPLIFIGMSNMPPATPMNYVPWVVVCFIFNYVIRRRHFSWWAKYNCASIIFYLTPLAIPGFLTHLA	XP_009551263.1	8.7e-37	oligopeptide transporter [Heterobasidion irregulare TC 32-1]	No differential expression	Not secreted	NA	NA	PF03169.16	OPT
Lactarius akahatsu	Lacaka1|MSTRG.5150	7871	116	MYYIGGPGLTAHEFARELLSSTSLALLTAAQALTFLLFFVRLASGLVKQRNIEDRAATEQEGVLFRGQGWLVVGMKLSMCETALGWVAPSFGLLFTRRGIRLIGRACIVIGVVKGF	KZV72562.1	9.7e-20	hypothetical protein PENSPDRAFT_683632 [Peniophora sp. CONT]	No differential expression	Not secreted	NA	NA	NA	NA
Lactarius akahatsu	Lacaka1|MSTRG.5171	1491	116	MRSLSTSLRAQALPGSAGHATCASSCHCGRRMPLESHTSLLVIDMASSHSPLFPRLCMLASLGKLAHLLQEEIPPSNIVVGSDLAGRDLMPYSFACWSGLSGAGGQKGMDPLQGTS	NA	NA	NA	No differential expression	Not secreted	NA	NA	NA	NA
Lactarius akahatsu	Lacaka1|MSTRG.5690	523	116	EQQGAFLSIPLNGVREDAIRTKAFGSYIRRHCDSWLEFASVNEIDVRLEDIIFVTGCDLTASWAMAVFVNSLDPEISLNARISEAGSARFQWAPTNQPHHNEPNQVRQSSLCFLPH	XP_007310902.1	2e-09	hypothetical protein STEHIDRAFT_172904 [Stereum hirsutum FP-91666 SS1]	No differential expression	Not secreted	NA	NA	NA	NA
Lactarius akahatsu	Lacaka1|MSTRG.8446	623	116	MADGRITEHGSFDEMMANGDDFARTFDEFVTKDQTESKGKTGVDIEDVDADEDVKKRRAAKRGAQLMQVEERNTGVVSFQVYKQYIQSGNGAALVPIMLVTLVLTQVSIVLSSYWC	XP_009544627.1	9.7e-20	ABC transporter [Heterobasidion irregulare TC 32-1]	No differential expression	Not secreted	NA	NA	NA	NA
Lactarius akahatsu	Lacaka1|MSTRG.8874	906	116	NIIDQDVKTLSGGELQRVAIVLALGKPNVNVYLIDEPSSYVFRRARFAPSERFCSLLFSFLDSEQRIITAKVIKRFILHAKKTAFIIEHDFIMATYLADRVIVFEGSPAIAATATP	KIP04509.1	2.5e-36	hypothetical protein PHLGIDRAFT_129467 [Phlebiopsis gigantea 11061_1 CR5-6]	No differential expression	Not secreted	NA	NA	NA	NA
Lactarius akahatsu	Lacaka1|MSTRG.9937	1304	116	MEDFAKAEKKRLVLLNSPSDEHPQVLRTRKPSQATAGWEVGLSGTASLNRTDFRLPAPRTMQEHKLSQSNAMPRRYSGPRRWDYSNGYLAHHLHGHVRMHQIHAYLSYCTSLSSLV	NA	NA	NA	No differential expression	Not secreted	NA	NA	NA	NA
Lactarius akahatsu	Lacaka1|MSTRG.5156	536	117	MFKPHAGVWPHRPPAGQEGSLAADEDFVGALQDMASVESSYQKAINREPDSDGGEEDGEEEDEDRKGGEDPQEDGDAGSTADLAAAENNMAWVDTFIFNTRREGGRQTETSVLKTYK	NA	NA	NA	No differential expression	Not secreted	NA	NA	NA	NA
Lactarius akahatsu	Lacaka1|MSTRG.8456	523	117	DRLDHRVRNFQYEAQTVLERAAVLVRPRVGDWLDELVQEVAAGRLDLHSVEPRFQHRVLCGGHIKLHVFFDLRKRSARAESRGPPVRLRSARRPRSRPLYEGRRPLQHARGPRVGDK	NA	NA	NA	No differential expression	Not secreted	NA	NA	NA	NA
Lactarius akahatsu	Lacaka1|MSTRG.9486	7332	117	MWTSDYISSPPIITFPRTTFLSIDMSTPSTRSTLASGSHSNFQTIFHSSLRAYQKQTKKDLLSHPLAARLDSCDSPAAILAVLLDQVQEFEQSRSVDERLTKWLDPTSGNTYFANLR	NA	NA	NA	No differential expression	Not secreted	NA	NA	NA	NA
Lactarius akahatsu	Lacaka1|MSTRG.12468	1782	118	MSGLVAISRDRPNRLISLSQTAKINRLVEQYHQNDAHPTDTPMVAGLQLHRPDKKLPTPPEISEWVERTPYRSLVGSLMYLAIATRPDIAYAVGRLSSFLDCYRPEHWAAAIRVLRYL	GAT58061.1	4.9e-27	gag-pol polyprotein [Mycena chlorophos]	No differential expression	Not secreted	NA	NA	NA	NA
Lactarius akahatsu	Lacaka1|MSTRG.659	9958	118	MTSMLYSFLSANNLRAPTVVPTHTGDSKCPEPAHANDHQGHPEETTTLATVTIPFAGRAVPTKVTVSLVPLHLGTGQARPRPLVYPAIFFIDMAHIASTLPQTITTTVPETTWSVPSK	NA	NA	NA	No differential expression	Not secreted	NA	NA	NA	NA
Lactarius akahatsu	Lacaka1|MSTRG.6600	1584	118	MNRPPASGSMSQTPLLAAIPPSLNIESIFDTALKSYKKKTKQDLKKHDLFKQLEKCDSPGAILAAFQADQFGPSRTGGDDDRLKQWFVPTVNVLYAFSATLGEGVGLVISTDLSAISF	NA	NA	NA	No differential expression	Not secreted	NA	NA	NA	NA
Lactarius akahatsu	Lacaka1|MSTRG.6905	5293	118	MPLTPSVTAVARVAHLSSDAVIDSPSVFSSYWKSLSRESTNVTILPHGSDPTPTLLRHNATSLLSHTTTSSPSLIRLLPHVSELSSLPIVFHIAAQGDLADALVLREVVPYFIHSLSA	XP_007310636.1	3.3e-23	sulfite reductase subunit beta [Stereum hirsutum FP-91666 SS1]	No differential expression	Not secreted	NA	NA	NA	NA
Lactarius akahatsu	Lacaka1|MSTRG.9344	1281	118	LSHSRVLSSVNPEIEPGSFISTPASGSVSPSSSSSPSQASPSSSTSPSKASPTSSASQFEYSPSSSSGSGSNTGAIAGGIAGGGRGPRSHQRLLIIHHVEENSARRRRPLRSTVGRHP	NA	NA	NA	No differential expression	Not secreted	NA	NA	NA	NA
Lactarius akahatsu	Lacaka1|MSTRG.9349	9354	118	MWTDRSESGEIRHAKSSLPTLLPVQPKPQLEPMNPVEYRSVSVVAFLWALLRFVQVTHLDTLIINLIGAWARLSYSLASQVLVYLLMNYFDVEILTALNSWVCARVSTGYSSPGSKQV	NA	NA	NA	No differential expression	Not secreted	NA	NA	NA	NA
Lactarius akahatsu	Lacaka1|MSTRG.2022	569	119	MPRSLLWYTSTSLRPPNFLTSLPFFLKRSSDVFPALRHALTLRFAKKSSEHHSDQTPASHMSSPALTSTVLDHNTRETRRLSFWKSQRKANRLEDGKERRLGSSILLALYIRRGHARVA	NA	NA	NA	No differential expression	Not secreted	NA	NA	NA	NA
Lactarius akahatsu	Lacaka1|MSTRG.3066	2894	119	MKAPTTHTTPFSLSPGYPECHLHSIHGLKSLLQAMSRAYISIAVAILALSAQVQQHVVPRRKSSTYSCASCFRRLQQRTCETSIISAHENQAFPMTSFALRLPKQPTYFLPYLLTYDPS	NA	NA	NA	No differential expression	Not secreted	NA	NA	NA	NA
Lactarius akahatsu	Lacaka1|MSTRG.4463	3672	119	MWRTSPSTSAFEFTTFFSPLEILYNVCSENRATGVAYALNPLLHPDGPRTTRTVRGTKLVLVSAGSFGSPGILERSGIGAKDVLERVGVKQRVDLPGVGEDYQGTTTIFDVSFFTNVCV	PSR75149.1	1.5e-20	hypothetical protein PHLCEN_2v9292 [Phlebia centrifuga]	No differential expression	Not secreted	NA	NA	PF00732.20	GMC_oxred_N
Lactarius akahatsu	Lacaka1|MSTRG.5814	2173	119	MLHLYFGLEPTRCQGMYPVIVVILVSRETSMDKTVFNQTLPVVITDLRQASSHFTVDQTTARRAKSTHMASLRFADAQGSHFTRGSLDPSLSRDSLASGSGPGSVVYPEIQSDHRDSVE	NA	NA	NA	No differential expression	Not secreted	NA	NA	NA	NA
Lactarius akahatsu	Lacaka1|MSTRG.5816	1941	119	RCGQLSVALCNNFIVQINYKPDPRGSSMYLPDLALLQVGIIVNARTIAFAVEFCLRIIILRLGRFSTLVSKQLLRVLRREIPLTEDLQYASMARCFPALSPGRTPYPWGPDIPPSPRCR	NA	NA	NA	No differential expression	Not secreted	NA	NA	NA	NA
Lactarius akahatsu	Lacaka1|MSTRG.6065	1098	119	MPRSLLWYTSTSLRPSNFLTLLPFFLKRSSDVFSALHHALTLRFAKKSPENHSDQTPASHMSSPALTSTVLDQNTRERRRFSFWKYQRKANRLEDGKERRLGSSILLALYIRRGHARVA	NA	NA	NA	No differential expression	Not secreted	NA	NA	NA	NA
Lactarius akahatsu	Lacaka1|MSTRG.6894	2170	119	MSSEILWNFSRYTDDRRIALRQNPHFYLHLPTFGDDAYGTRFPMVAMKDFLLKPNDTVYVLVDKPDLGRVFLEVDSEAKIRKRTFGNVWMPNNVLIFKGEPNISPSVPLSNIWQISVGH	NA	NA	NA	No differential expression	Not secreted	NA	NA	NA	NA
Lactarius akahatsu	Lacaka1|MSTRG.10049	1011	120	MASTSSQARADRTIRVWNATTGETVAGPFTGHTSSIRSVAFSPDGQRIVSSSSDRTIRVWNATTGETAAGPFTGHTDSVETVAFLPDGQCIVSGSTDRTIRVWNATTGEVVARSIYWTHG	KIM22562.1	8.8e-08	hypothetical protein M408DRAFT_322823, partial [Serendipita vermifera MAFF 305830]	No differential expression	Not secreted	NA	NA	PF00400.33,PF12894.8	WD40,ANAPC4_WD40
Lactarius akahatsu	Lacaka1|MSTRG.2724	2852	120	MSRVELNTIEADGVKVFYRSAGPPTAPVLLLLHGFPSSSFQFRELIPLLASKFRILAPDLPGFGFTEVPAERKYQYTFDNLSLTIEGFLNALKVDKFAVYIFDYGVRISLSLQRRTAERR	SFF53516.1	1.1e-37	Pimeloyl-ACP methyl ester carboxylesterase [Duganella sp. CF458]	No differential expression	Not secreted	NA	NA	PF00561.21,PF12697.8	Abhydrolase_1,Abhydrolase_6
Lactarius akahatsu	Lacaka1|MSTRG.6553	360	120	YVASPTQNLIPSTGMTSCSSSRLSMHRGGTPFNHPSKFQRTASGAKCASSSSTDSGFTEERQKQFEDMLMRLTASAGFSLNWVSNPEFLTFCREFIPEAKIPSQKSLTNRILPRLLNNIH	SJL01174.1	3.5e-12	uncharacterized protein ARMOST_04492 [Armillaria ostoyae]	No differential expression	Not secreted	NA	NA	NA	NA
Lactarius akahatsu	Lacaka1|MSTRG.9866	1629	120	MLFAAAQQPIYIVIDGLDECPDISGFPTPRAVVLNFLEDLVELHVPNLHICVTSRPEFDIKIVLEPLAYISVSLHDESGQKKDISDYVSNVVYSDRKMRKWRDGDKKLVVEVLSEKADGM	OCH90532.1	9.4e-26	hypothetical protein OBBRIDRAFT_592935 [Obba rivulosa]	No differential expression	Not secreted	NA	NA	NA	NA
Lactarius akahatsu	Lacaka1|MSTRG.4288	1579	121	MDVDWLFPLTRLGKYWHEGRKLLDRSFRPGAAALDRRLIEEKTRVLLGQLPATPKVFREHLYLLVPLPRHLITVDSRCSFQGRIVMHLTYGYDLKENDDMLALPKRIADVIKPFFYLEQHW	NA	NA	NA	No differential expression	Not secreted	NA	NA	NA	NA
Lactarius akahatsu	Lacaka1|MSTRG.6806	418	121	LNTKERVAYDDVSSDSRFSSEARQSPYQSVVCLPIFSNRGQTFGALYLASKYAFSQNTVTLLTLLCQQANISVANALLFRSVQAGTKENLRMISTQREALEDARQSREDALKATRVLYISF	KDR85277.1	2e-44	hypothetical protein GALMADRAFT_218372 [Galerina marginata CBS 339.88]	No differential expression	Not secreted	NA	NA	PF13185.7,PF01590.27	GAF_2,GAF
Lactarius akahatsu	Lacaka1|MSTRG.9358	2310	121	MGTFPGSTFRGLKLVDFSSKPTARPFIHSLRPICETIFSLLLLTFIASVKAFRDRFASQQKSLDGWDRALKFAEEALEMSQTAEELRQENSTDTADAMAGAAIKALKLRYVYFSELTFLTS	KIL59239.1	4.5e-28	hypothetical protein M378DRAFT_1068410 [Amanita muscaria Koide BX008]	No differential expression	Not secreted	NA	NA	NA	NA
Lactarius akahatsu	Lacaka1|MSTRG.9394	1512	121	RTRLWHSHSGGIPKYSRKNRVSNCVLGRQRRRKAYHGSEPEPYYTAQYYPHRMRVTLKQGQRAAKSLSLCDVATSLPTTVLNASMPNLVESPTLLPTPKDRSLHSLGTPPSQSLATCLVAS	NA	NA	NA	No differential expression	Not secreted	NA	NA	NA	NA
Lactarius akahatsu	Lacaka1|MSTRG.3692	510	122	MFLVCVRRASGKAALATQLPVLSPILRYAIRGTTPGGRFLRPASQRAIQVEIFAWLVALSTFTVGTMRAQTSDSVKRVSSKDELCSEHGTPTSCVTGVLPHGPEMRVCELAVQWSREVEATN	NA	NA	NA	No differential expression	Not secreted	NA	NA	NA	NA
Lactarius akahatsu	Lacaka1|MSTRG.4465	10470	122	MVFVNLLDAVKYDSRALARGALSLMQRVQLDIDDDIRLMVCGRLFDYTAGRSTALIGVGWGGAENAGIWQEGEHRNTAGERTRWYGREVRRETRGIWGRREYEDARNGMGTQMRNGSVRVVY	NA	NA	NA	No differential expression	Not secreted	NA	NA	NA	NA
Lactarius akahatsu	Lacaka1|MSTRG.5790	368	122	RAFKSAELNYPVHEKELLAIVRALGKWRTDLLGFTFEVWTDHKTLEHFGTQRDLSRRQARWMEFLSQYDATIHYLPGEQNTVADALSRLPDPDTTVIATIFSQTHNRKIRSRFELEDAILDE	XP_001878170.1	3.1e-32	reverse transcriptase-RNase H-integrase [Laccaria bicolor S238N-H82]	No differential expression	Not secreted	NA	NA	PF17917.2,PF17919.2	RT_RNaseH,RT_RNaseH_2
Lactarius akahatsu	Lacaka1|MSTRG.6669	2722	122	MLSCQAPPLHIRLGISFFNANPKSSKWFNRDRFVLSNGYDFFHFDTSHGCLIIPLSYLQSRVGLLIARARIRRLIMNSCALLYIVLHLSGYKLSLDDLKAFRQIDSLTPGHPEARHTDGQEH	KIK91435.1	3.2e-21	hypothetical protein PAXRUDRAFT_797644 [Paxillus rubicundulus Ve08.2h10]	No differential expression	Not secreted	NA	NA	PF00456.22	Transketolase_N
Lactarius akahatsu	Lacaka1|MSTRG.8364	10513	122	MRADLLQALEVVAQLRVHAVRQDLQVLAVDNVALTVQEPQGDLELRRVLDDRHEPLQLVRVELARPTSFQVVPFEELERGNVPLVEVHVCLLADDVGISPAHTLDLCQGVHDLPLAIHVRVK	ODP69016.1	2.4e-08	hypothetical protein BGC29_19500 [Acinetobacter baumannii]	No differential expression	Not secreted	NA	NA	NA	NA
Lactarius akahatsu	Lacaka1|MSTRG.8892	3555	122	MRAQIANARFNPREADQAFLNVYFGADAVRLPYVYNGNLAIRERSPALWDALRDELRIVHYTLPKPYPKEGKEIVEGAHLERAIERARKDRGGVHVEAIEWWFTAYKEFRMQNRVALRQCDV	RDX49329.1	2.6e-23	nucleotide-diphospho-sugar transferase [Polyporus brumalis]	No differential expression	Not secreted	NA	NA	NA	NA
Lactarius akahatsu	Lacaka1|MSTRG.10628	1989	123	MAVGLHLTSNIFGGCLWDVVSNDKFVVTHVIAPHPWQPHSQCRIRWRLDSNELRAYNIQLKWLSRSLVEFFNQNQLLPVPPVMHVMRHFHETTDRTFATDDDSYKLPHCLNFAQNPEVGQEAC	KIL59303.1	1.9e-10	hypothetical protein M378DRAFT_169471 [Amanita muscaria Koide BX008]	No differential expression	Not secreted	NA	NA	NA	NA
Lactarius akahatsu	Lacaka1|MSTRG.118	371	123	DVPFILSNGDVSQSARPVTLCLAITVSANVPQDVPPSVIANDLPAEMTNTAEEATQPSMSPDSRGPIQPPFLPSSNPLSIGDAQIALHRVDEVKKPIQVDRANMWNEAINRIKWVMDTLSPLV	NA	NA	NA	No differential expression	Not secreted	NA	NA	NA	NA
Lactarius akahatsu	Lacaka1|MSTRG.3169	3794	123	MLNKPTGFPICTIANTPRLPEHCIEWASVLEWPKVKGGTHIAYRNGRIKFPFADTKLDTDDPEHIQWLYNVALGRAREFKIEGVTWSLTQGVIKNIIPAIASTNAIIAGMSPLSPRTRVLTAN	XP_007300464.1	1.8e-40	hypothetical protein STEHIDRAFT_51350 [Stereum hirsutum FP-91666 SS1]	No differential expression	Not secreted	NA	NA	NA	NA
Lactarius akahatsu	Lacaka1|MSTRG.5282	1155	123	MTDMIVKIMVEVLNIFAIATKEMKQGRASVLLPRDTWMRTNLSLEKFFKKLMGKKDIEDALARLDRLTQEEARMAAAQILRLTHSVNDKVKVVDDKVTVVGNQMKNVDNKVNDMGSKMDIVLN	KIJ33579.1	3.4e-07	hypothetical protein M422DRAFT_264520 [Sphaerobolus stellatus SS14]	No differential expression	Not secreted	NA	NA	NA	NA
Lactarius akahatsu	Lacaka1|MSTRG.6602	1515	123	MRPNAPPFSPNYVHVADVARAHVAALRVGPLDPPRRRKRVLLVAGYVLWPEVVAHLSEAMPEIRERLPSLAGGPGPRQVSSFARFETRNAREILGIEEYKGWKEAVEDAVKDVLRVESRMTDL	KZT26830.1	3.2e-13	NAD-P-binding protein [Neolentinus lepideus HHB14362 ss-1]	No differential expression	Not secreted	NA	NA	NA	NA
Lactarius akahatsu	Lacaka1|MSTRG.6667	3400	123	MQRRGLGRRCGVPSFPRKHGLRREAVVPVVALETHGSACFYHSVAANRTPADDAPTGVTLRTDDTHGVRVAHVTELKSKATSLGASEPSAGVVRAALDRAGGTKCVTVPDEVTMQLAGAFAGE	XP_009542401.1	7.9e-20	hypothetical protein HETIRDRAFT_438326 [Heterobasidion irregulare TC 32-1]	No differential expression	Not secreted	NA	NA	NA	NA
Lactarius akahatsu	Lacaka1|MSTRG.8405	5977	123	MITPTAVCAKSHPDCHDPSLVHSGYYCSPLKQAKIKRGGLDGLDDDNDPKPSMTHSRHSPSTMTPTNHHPHPTPSGRQQVQPRSQKTPPPRQPSMATCRATAMSLDPVALSVHDSWMRRRAVQ	NA	NA	NA	No differential expression	Not secreted	NA	NA	NA	NA
Lactarius akahatsu	Lacaka1|MSTRG.10464	1332	124	MRTPASRRTHDCILDEPECAEVQSSSHTRTFRPQAVPIALPSDIASKERRADALRARGLLPPRSQALSAIEAEEDRSIDALQVNGSSFPGPDRNITMHNNASIIAQLSLIHDDETRRLTEVAFM	NA	NA	NA	No differential expression	Not secreted	NA	NA	NA	NA
Lactarius akahatsu	Lacaka1|MSTRG.11895	1528	124	MITDTDGITESHEESRRGKRRGRRTPATPMGTTCDQHTKSYVQFKFIDAELLGGPLMRGTKRRIPTEGKRGGDAIQGKSSVTLVTKSDISAVTVDSTHGTIKTPRILSDGDSDHHSRAPVISQK	NA	NA	NA	No differential expression	Not secreted	NA	NA	NA	NA
Lactarius akahatsu	Lacaka1|MSTRG.1577	639	124	MFRSITLRDPSEPIDGFPTTPPSLIAPLDDPILRTLTPLVQSTLNTTTATITALEAPAAEILEPEELYACYVRGSEMCYICVTHTLVDAPDVRLKEEEVVLGRHQQKTEKISALAGTRNCFHEL	XP_009541730.1	5.9e-07	hypothetical protein HETIRDRAFT_31769 [Heterobasidion irregulare TC 32-1]	No differential expression	Not secreted	NA	NA	NA	NA
Lactarius akahatsu	Lacaka1|MSTRG.5466	1284	124	TIDYQGRQLFIDFTLTPYSGTTPLSFAAAQQTLQLSYSDTLFYFDRGSAATTGLDSVGVRAAQSGYPTSQLADPPMPIPSSSFNHLSLDLEGLALAPDGTCDFVFRCSFLFFLFLITEVAQVLG	XP_007382452.1	7.9e-28	hypothetical protein PUNSTDRAFT_133002 [Punctularia strigosozonata HHB-11173 SS5]	No differential expression	Not secreted	NA	NA	NA	NA
Lactarius akahatsu	Lacaka1|MSTRG.800	3935	124	MLDNTAESLDIGDLPIVPGTMRATYLFRSVRSTLSTIRLRQFLLWDIPPGSGWELAYRLARVNRKAVALQMTLASIGAILFYAPPFFLQQLVKYLETDPERHDRSWGWFYSFGIFVGTASIYLG	XP_009549923.1	8.4e-38	ABC transporter [Heterobasidion irregulare TC 32-1]	No differential expression	Not secreted	NA	NA	NA	NA
Lactarius akahatsu	Lacaka1|MSTRG.9351	2033	124	MSVPRVPSSTEVGQHVCEPLVSAECDPRYHTVKVMTYGDSVLLRLNWRAFLAFNMLRSFAQLVGLPGVTSSRTSLPLRVPTYEISYITSSRDNWLEKFPAEESDLDTFIRLSEREYSSIISLNL	NA	NA	NA	No differential expression	Not secreted	NA	NA	NA	NA
Lactarius akahatsu	Lacaka1|MSTRG.9441	6133	124	MLLQALLYLIQAAWGRVERAPALKELFQRGPTPPGQRCHDPGLTQSFSDPRLYFSHLVRPSQRETGRQETHGVLIANFIHTGPFSRRPQIMQSWVRQVFENPFQPWRFVFPCGQVVPVPERETA	NA	NA	NA	No differential expression	Not secreted	NA	NA	NA	NA
Lactarius akahatsu	Lacaka1|MSTRG.9823	376	124	RKSGYPGVDPHNDRPSCTKIFYASRTHSQLSQVVPELRKLRREACRNLDSSRPSHPSTQIPMKDEARKRKYEPVGSEADSSNGLPETRLVSLGSRRQLCLNEELKAKGGDLDERCRELLQGISL	KIJ59456.1	4.2e-21	hypothetical protein HYDPIDRAFT_118436 [Hydnomerulius pinastri MD-312]	No differential expression	Not secreted	NA	NA	PF06733.16	DEAD_2
Lactarius akahatsu	Lacaka1|MSTRG.10457	443	125	EERAAEQAETLRHLTEANAVLSARALQLAEDAGGGAGGAARGQHRVGARADAAACITRGDQPRADGKWEPAPAAARAGQAIAIPVASGEGTWRHVRIAFLFFYSFGKPGTLPCRAFCLSCFTTSV	NA	NA	NA	No differential expression	Not secreted	NA	NA	NA	NA
Lactarius akahatsu	Lacaka1|MSTRG.10529	1260	125	MIRVWNCTTGQTVVGGFTGPESRLEFVAFSPDGQPIVSGSSDGTICVRNATTGEIEAGPFIGHMSQIRIVWHSRQMASASSQARTTDQSVRGALRQERQQDKLIQSSPWHPRQMVSALSHQEFIY	NA	NA	NA	No differential expression	Not secreted	NA	NA	NA	NA
Lactarius akahatsu	Lacaka1|MSTRG.11243	3196	125	MIRVCKFFPPFLGMRDLGIITSPLSSDQVTVDGKKWRRLLRPFSGAERFLVAGGYATNIIRALQRADGELVTVLPALRKLSVAMEPELVCAPLQAAVASFSTSCQLSGYPIEVEYSGTRFGTWQK	NA	NA	NA	No differential expression	Not secreted	NA	NA	NA	NA
Lactarius akahatsu	Lacaka1|MSTRG.4311	375	125	DAPFVFTNNGDKPAGQSVQLVTLYLTVALSPNTISYPISPINAPDLQSTKISDSPSREAQQPSLPQDPTNPTCSTIATGSETLSPAESALHGAGEALGTINLSNTWEDALERIKWVMDTVSQVAE	NA	NA	NA	No differential expression	Not secreted	NA	NA	NA	NA
Lactarius akahatsu	Lacaka1|MSTRG.5672	2128	125	MQNRIEINIYLTAKIKDDDMTNIFVQDVGAEKDAITSLRAPTHFGRPNWDRVFSSIAEKHTDTDVGVFFCGPAVLSRQLHQMSNKYSTPGGTRFFFGKGAYEFSPPDPLLTFFFRSQRTSKSSSF	KDR77163.1	2.7e-44	hypothetical protein GALMADRAFT_155811 [Galerina marginata CBS 339.88]	No differential expression	Not secreted	NA	NA	PF08030.13	NAD_binding_6
Lactarius akahatsu	Lacaka1|MSTRG.6693	1283	125	MHHLDTPPPSTLAPLTHLSHLDAGHPASRQAHHRCPSRRRTELKIFSFSFFLFLYFSYSIADHPTHRPNLVATSPRLPHLATPTASFSPQRRHLDRITPDPAAPPRRRHPNHATPTTPPPQPSPP	NA	NA	NA	No differential expression	Not secreted	NA	NA	NA	NA
Lactarius akahatsu	Lacaka1|MSTRG.923	712	125	QVAPFTMPLYSPGLIPRLSMLCACSGCVMFHLAVLSCAALARLVKDDGLLLNRSRRGPGQAAPELHPPELRPRRPLATPASSSSLDPHPFESKHYFAHLALPSMHVIKTSINMSCFSSPLGMASF	NA	NA	NA	No differential expression	Not secreted	NA	NA	NA	NA
Lactarius akahatsu	Lacaka1|MSTRG.1008	1087	126	RKKIQLGRPPPPPIRSARSGRTVRVPRRFADYFPHGDMTLDHVPPRAPTPPEGNDRSVISETVEEPPSDPRPHPFQTHVNKLGIFRRYTHTPTWLPKHDERFDLVCDSPSLDAPPPPPPRHYRRDT	KIK35594.1	1.7e-06	hypothetical protein CY34DRAFT_16927 [Suillus luteus UH-Slu-Lm8-n1]	No differential expression	Not secreted	NA	NA	NA	NA
Lactarius akahatsu	Lacaka1|MSTRG.12615	2292	126	FKQGFKELYFASPATPRTRLRNVNPSHPRLRSTSWAMPLPSFYGAHAICQLVHLQQYLFSHVPVPFPPGATPNLKWRARQWLQGFQHFGLAAHEVARITSPSLPPLHVAMDTGADHLANGFYPTRS	NA	NA	NA	No differential expression	Not secreted	NA	NA	NA	NA
Lactarius akahatsu	Lacaka1|MSTRG.12629	987	126	PELCDRNASSNNQESPMDETSNSETVHTHDLATLSQKKKKAFICAHLHRTPSWLYSALFFFLAFHFLLSVYHSVWSQLGHLLPTVITRVVIQSDVRCDWHRSAFSHIIPFDTTLLRHKPALWLLQN	NA	NA	NA	No differential expression	Not secreted	NA	NA	NA	NA
Lactarius akahatsu	Lacaka1|MSTRG.5313	2368	126	MLPPRRTSGSWSKISGVFLEIWERLEKHGDIADDHVSPVLICTLTSSLAITDCPTALIPLVLSQRPIFRSFRRISYLCHPSCQQSIPIGDASAPSPSIPSPARTSSSSPPSPHQMRQQYQLTTTQN	NA	NA	NA	No differential expression	Not secreted	NA	NA	NA	NA
Lactarius akahatsu	Lacaka1|MSTRG.6795	4100	126	MDGTEGLVRGQKVVDTGSPIQIPVGRDTLGRIMNVIGEPIDERGPIKGVARKPIHAEPPAFVEQSTTAEVLETGIKVVDLLAPYARGGKIGLFGGAGVGKTVLIQELINNVAKAHGGFSIFCGKSM	XP_007301304.1	9.4e-61	ATP synthase F1 beta subunit [Stereum hirsutum FP-91666 SS1]	No differential expression	Not secreted	NA	NA	PF00006.26	ATP-synt_ab
Lactarius akahatsu	Lacaka1|MSTRG.8254	3715	126	MTSLPPSLLVCLLFMMTLYRCLSLCIGCAVSWDGYFNQQTEHDSFSSVLDLVLNCACFVYIGAWLPFDKFHISEIGVTPWRLMVLVLIILALRRIPSLLLLYKLLPEVANWREALFCGHFGPVSVF	KII92097.1	1.1e-37	hypothetical protein PLICRDRAFT_36884 [Plicaturopsis crispa FD-325 SS-3]	No differential expression	Not secreted	NA	NA	PF00999.22	Na_H_Exchanger
Lactarius akahatsu	Lacaka1|MSTRG.8708	1489	126	MRYCLERGALCVGVVNTVGSTISRDSHCGVQHQRWSRGRWWHLRRLYTSQYIALLMMALQLSEDRISLTERRNQIISGLHALPGQIRSVLAGDTALKEMAEGVLAKSTSFCSWAVVTSACLIDLAH	XP_007313830.1	2e-31	hypothetical protein SERLADRAFT_457537 [Serpula lacrymans var. lacrymans S7.9]	No differential expression	Not secreted	NA	NA	NA	NA
Lactarius akahatsu	Lacaka1|MSTRG.9457	1531	126	MHHVQLLGVGAPSVRIMTLHNTLAGADFLHTALSSPVHGSPPPAVRIRSCSLFLQPAPPSRPKEDVQFELLLLWCQSSMEFLLKFPSRRSPLLFINGNGGDLPYPKEISARHFWRNSKLHRCELLS	NA	NA	NA	No differential expression	Not secreted	NA	NA	NA	NA
Lactarius akahatsu	Lacaka1|MSTRG.9650	6405	126	MFFSRPPKDKTYEHCRISFVRQHIPVSVVYTVCRTLEKGDTARMGIYGPDERLSHAVQGPSATRVLSPERRPVKSLLRPISMESLNLNALAGSLPTSNLANAEKELLNNFRGNIPNIFLSPHHPGD	NA	NA	NA	No differential expression	Not secreted	NA	NA	NA	NA
Lactarius akahatsu	Lacaka1|MSTRG.9828	1235	126	MAPDYENLILLQKIEVFEYALENTTGQDLYRVLWLKSINSEHWLERRATFTRSLAVNSMVGHILGLGDRHPSNIMLERKTGKVVHVDFGDCFEVAMHREKFPEKIPFRLTRMLTHAMEVGWVFLRP	XP_007363197.1	1.5e-61	atypical/PIKK/FRAP protein kinase [Dichomitus squalens LYAD-421 SS1]	No differential expression	Not secreted	NA	NA	PF00454.28	PI3_PI4_kinase
Lactarius akahatsu	Lacaka1|MSTRG.9983	6458	126	MIGRADIEGSKSNVAMNAWLPQASYPCGNFSGTSSLELRGTKGSIGHTFMVCIHTENQNQGDFYPFVLLEISVLDESPLGHLRYLLTDVPPQPNSPPDNVFNPDRPAKDLEAKRWDFHPSSASSNK	OXB39224.1	1.7e-62	hypothetical protein J007_00982 [Cryptococcus neoformans var. grubii]	No differential expression	Not secreted	NA	NA	NA	NA
Lactarius akahatsu	Lacaka1|MSTRG.12709	426	127	MAQSSPLSAFPRVPHSRAPVLATQEKRILCRGDRASKVSRRAEMCAIPCVTSYQYKRLLSRGGSPLTFPSAPHLYAALELQERHVPDLCGRLYDVARHAKARVIICNASQVRNPRQTFGEQFPGPTT	NA	NA	NA	No differential expression	Not secreted	NA	NA	NA	NA
Lactarius akahatsu	Lacaka1|MSTRG.2145	1066	127	GRHRTPLHLASSKGSPEIVQLLIGHGANVNAQDRSSLTPSYLASFSKNTDTVRLLIKHGADVNAQAQDGSHSTPLHLALSSWSLKTMRLLIKHGADVNARDGSHKTPLHLASYQVNAKPAQLWIQQG	NA	NA	NA	No differential expression	Not secreted	NA	I32	PF00023.31,PF13637.7,PF12796.8,PF13857.7,PF13606.7	Ank,Ank_4,Ank_2,Ank_5,Ank_3
Lactarius akahatsu	Lacaka1|MSTRG.3121	3510	127	MVREILKTRCHILFDKAALELWGIPIAMIKQAEHARTPDSGQQTPAMPATPDIYAVPLAPGAGTDVSIPDGDDLTPPPSAEESLDALDAAEKISDQLKKSVFWWVLEILPTYSVWQNEKDEWVGRWR	XP_007304721.1	1.6e-07	hypothetical protein STEHIDRAFT_121799 [Stereum hirsutum FP-91666 SS1]	No differential expression	Not secreted	NA	NA	NA	NA
Lactarius akahatsu	Lacaka1|MSTRG.3555	1351	127	MSHCHPLGPLRPSEASPSIGPTFAIRSAAHTFSLLLSHPAFVVPRALPPSVALQRQWAPPKIPSPSAYSWPRPVLHATQDPHGLAVLRVDRFCQATGLSHRSAVSVSYLNLFNSLLLTARAIVPASD	NA	NA	NA	No differential expression	Not secreted	NA	NA	NA	NA
Lactarius akahatsu	Lacaka1|MSTRG.6603	6925	127	MNRTLTPADLSRRLGERRRESKASNGQYSQNTGHKMFGSSKYVRLVPLFFSFPTFNCFHTNSGSTLLTIFGGRLHDIHTFLTEERLPEGWESRVRDQMGLTLFAFNRTVIRVELGIEEEVNQPLHLM	XP_009550944.1	1.6e-23	chloroperoxidase 4, partial [Heterobasidion irregulare TC 32-1]	No differential expression	Not secreted	NA	NA	NA	NA
Lactarius akahatsu	Lacaka1|MSTRG.10498	4029	128	MPSAGAMIVRAATSTSSSSPKGALPPISIVFICAGFIAITMFSLCMWRKLLSGEAFQPVLVHIPIARGRKNDGDSANDRPEMFDTWTERCTSKNLKWEEYVVSTTLSSLGWAITAAYGPPPPLSSLSP	NA	NA	NA	No differential expression	Not secreted	NA	NA	NA	NA
Lactarius akahatsu	Lacaka1|MSTRG.11360	1425	128	MTIQQLFPVPVVAVFTKFDQFRRNIQIHLEDFGSPDDNVFDVADKRFQEYYLRPLGDDVRWVRLESESRSKYQSFVLMFSAEMNRPNMRCDELIETTAAALNDDIVGLMLLAVQRGNLELSVKTALNR	KDR68943.1	1.5e-21	hypothetical protein GALMADRAFT_160725 [Galerina marginata CBS 339.88]	No differential expression	Not secreted	NA	NA	NA	NA
Lactarius akahatsu	Lacaka1|MSTRG.2074	2052	128	MLELVDWNTDKAFPRRQERCIGVSLRSNPLHVCSQPPPPRAASIATLWERPRIGHHFAVTSKALEPLEEERTGTVIRPRSPWALKRVIFAFSTYFLRSLALTHTHPRFLYAFPRFAAFLRASSLSRVL	NA	NA	NA	No differential expression	Not secreted	NA	NA	NA	NA
Lactarius akahatsu	Lacaka1|MSTRG.5271	6560	128	MESLAYILIYFLRGYLPWQGLPRGSQDVVEYKQRTPRDLCHGLPVEFCTFLEHCRSLSFKEKPDYRYISGLFNDLSSREGFQNDLAFDWDGTNNEQPCPVSDSPAKGTVRGQCGQPLKRREGYVTFLS	SCZ98494.1	8.2e-20	BZ3501_MvSof-1269-A2-R1_Chr7-1g08883 [Microbotryum saponariae]	No differential expression	Not secreted	NA	NA	NA	NA
Lactarius akahatsu	Lacaka1|MSTRG.5743	7304	128	MTPVDWRQPTTRSITSPAAATVPTSRGPLRLAQGFSTIPSISTCVSKSREGTHDKCDVALGEECHPVKYLKCKRTDNSTTTVQPSATRLGDDEDPAYELTRFRAPQQCAQKMQPSARLQYHHARQTAP	NA	NA	NA	No differential expression	Not secreted	NA	NA	NA	NA
Lactarius akahatsu	Lacaka1|MSTRG.5791	2727	128	MTPVDWRQPTTRSITSPAAATVPTSRGPLRLAQGFSTIPSISTCVSKSREGTHDKCDVALGEECHPVKYLKCKRTDNSTTTVQPSATRLGDDEDPAYELIRFRAPQQCAQQMQPSARLQYHHARQTAP	NA	NA	NA	No differential expression	Not secreted	NA	NA	NA	NA
Lactarius akahatsu	Lacaka1|MSTRG.5853	5866	128	MDPFKCGFLDESDLEDGNFPIPTIRLLFSLSSTKGSPPSVTVTPPKDTASRRGNKPNSNFTSYDFVCTGADENILQPVAESPDVWASLVNSSNPWSSFYSVPVPDVLRSQLPGCGTNEGHWMNWVEGL	NA	NA	NA	No differential expression	Not secreted	NA	NA	NA	NA
Lactarius akahatsu	Lacaka1|MSTRG.6595	2883	128	MASIALAPLVWSTSIELGGLGLSPSSIGLWMSGYGCMNGIVQYALSPRLISRFGPRAVFLTSVSICALIYALFPFENLALRYAFGGSGVAERLLITLQISLFCVAQMGFSKLIPYPPSCAGTDGAQIH	KIP10447.1	9.7e-13	hypothetical protein PHLGIDRAFT_230128 [Phlebiopsis gigantea 11061_1 CR5-6]	Repressed during mycorrhization	Not secreted	NA	NA	NA	NA
Lactarius akahatsu	Lacaka1|MSTRG.826	1436	128	MTIQQLFPVPVVAVFTKFDQFRRNIQIHLEDFGSPDDNVFDVADKRFQEYYLRPLGDDVRWVRLESESRSKYQSFVLMFSAEMNRPNMRCDELIETTAAALNDDIVGLMLLAVQRGNLELSVKTALNR	KDR68943.1	1.5e-21	hypothetical protein GALMADRAFT_160725 [Galerina marginata CBS 339.88]	No differential expression	Not secreted	NA	NA	NA	NA
Lactarius akahatsu	Lacaka1|MSTRG.8592	1751	128	FGAQTNDPRTDAFNRYKTATGGVPDAATGLLKITSTQFNNLQSLFFTTGGRAFELTANAQIWPRALNTFIGGTSGSIYLVVNDIGSPTGSGLDFINGYTFLERFYSVFDTTNNRVGFATTAFTTATTN	BAL02925.1	8.1e-44	aspartic protease [Pholiota nameko]	Induced during mycorrhization	Not secreted	NA	A01A	PF00026.24	Asp
Lactarius akahatsu	Lacaka1|MSTRG.8973	3440	128	MWAERWALYATQEFVQVSRLVKPVKTEVAFTGPYAKRFRPPDSPFSITCPCGSGFRNLQHLIVSCPRSSTHQLGGHKTILSPPPPPNTRLFSTTNTRLLNFLQESRASEQGPAPLDNPPDPHVPPELD	NA	NA	NA	No differential expression	Not secreted	NA	NA	NA	NA
Lactarius akahatsu	Lacaka1|MSTRG.10325	2854	129	MPAQSEFGDAATMIDGPVASSSGYASAYKHAHAHVASGRAKGAESASGTALTTFARTPDYFSEERPFVVHIGKKGVLGALEELDGHLRTVSYSVRRHNAEKTDAPHRRLDTARFFPIRCAHCVGLLQAD	NA	NA	NA	No differential expression	Not secreted	NA	NA	NA	NA
Lactarius akahatsu	Lacaka1|MSTRG.10633	3324	129	MSRPIPHLGEHAVIFAGAQKNLGPAGLTVLIVRHDCLVDVDAAAKLGAAPVPLSLSYKTLADSKSLYNTPSMLPIYITGLVLERMQELGGLTYFEALNKKRRKKCTRPYGPARNAECSKERFKTAQAVG	XP_007301008.1	5.5e-40	phosphoserine aminotransferase [Stereum hirsutum FP-91666 SS1]	No differential expression	Not secreted	NA	NA	PF00266.20	Aminotran_5
Lactarius akahatsu	Lacaka1|MSTRG.6708	1367	129	MQANASHFDQDVIGFKNASFTWSNDDAADGALTPSRLRFTLRVHDELLFKRGCFNLIIGPTGSGKTSLLMALLGEMHFVPMSPASWYHLPRAGGVSYAAQESWVQNETIRVTPIGFLALALFGAERETG	KZV76920.1	5.5e-40	multidrug resistance-associated ABC transporter [Peniophora sp. CONT]	No differential expression	Not secreted	NA	NA	NA	NA
Lactarius akahatsu	Lacaka1|MSTRG.6920	1057	129	MPLRNSSREICRSHSTITHTDNLPATMVFPDPYPTPPETYAFSPSPDAPKEDDSIAQWDQLAGYAQPEPVEGINFDFEGLDALLAWELGDTLPEPTPASQLGGGLVSIFIPTMEELTNICHRISTGAPK	NA	NA	NA	No differential expression	Not secreted	NA	NA	NA	NA
Lactarius akahatsu	Lacaka1|MSTRG.9003	2070	129	MEGYFCVHSVPPHIPTRFPNLPDRWLLDRGIVNSGTVVPQTMWSPRTAADKRQHVEEAELQMPIFFEAKDGRLGLSLGASIGGKCHGLRDAGVPAPLGQKTTTHIRIVVSIAIVGLWPHADFGHIDYCH	KZV67890.1	6.1e-07	hypothetical protein PENSPDRAFT_754594 [Peniophora sp. CONT]	No differential expression	Not secreted	NA	NA	NA	NA
Lactarius akahatsu	Lacaka1|MSTRG.9584	2878	129	MPDLEVAEPYLGVEDREREDVVDEGFGSPSLRRHTENLFPPETEYLYLSSIRVICETLTWVNNSFVSRPHSVSSNAASKLNNPRLPLRQLPVILSSSIVWTFCTCNLMLGPFGVFAAQRYRSSCRRASK	NA	NA	NA	No differential expression	Not secreted	NA	NA	NA	NA
Lactarius akahatsu	Lacaka1|MSTRG.4718	2972	130	MADIKIWCLVIDHDHHPIFGEAFPVTVLHDDTVHDLKIKIMGTQHSPNLHRVVSTNSIEIWQCDSSKTTSTLSAKNCFHQTGMQIYELDFSESDEEPRDVWHLGAAQKVMDLELADNEILLALVPSSKSG	NA	NA	NA	No differential expression	Not secreted	NA	NA	NA	NA
Lactarius akahatsu	Lacaka1|MSTRG.8241	8980	130	MGGVWGLASSTALENLPVEARGLGSGVLQQGYACGYLFAAVMNLRLVPHTSTTWRSLFWAAAGISAFAAFIRAIVPESEVFLRARAEERAKGATTGKKTKVFIHQAGAMLKKHWLLCVYAVLLMTGTSNS	XP_007309222.1	8.2e-52	MFS general substrate transporter [Stereum hirsutum FP-91666 SS1]	No differential expression	Not secreted	NA	NA	PF00083.25,PF07690.17	Sugar_tr,MFS_1
Lactarius akahatsu	Lacaka1|MSTRG.9578	1458	130	MWDLIARLQVTNVSLKDFRQLDQNVKVGTYRKGSDVYENLTDAITNWAEKALLLADRTPDDHVLPLARDKEIAEPVGPRCTLPSLVAALDALDVWWDHGGRFHQESRGGAGWWGWWDVWSGIEGQFNVGL	NA	NA	NA	No differential expression	Not secreted	NA	NA	NA	NA
Lactarius akahatsu	Lacaka1|MSTRG.12479	994	131	MIIESLEDKLDFPGMTGAYLLELWRYHQRVRSDLQSNIFELKKSGLLHDVNALRCRSGRRSSSILPRWLDVFIGSLAEAPHLFDIIELENARARHIREETGYSCPCTDIPSQVIRALCEALTAVVRGTIEK	NA	NA	NA	No differential expression	Not secreted	NA	NA	NA	NA
Lactarius akahatsu	Lacaka1|MSTRG.12539	2966	131	MPYDANAQSSPSVAIDTPKSSVVGHLPLRFSEILESLFFFCPRPPHRAVQFYRPRLCRRWVRPLRCTLKKYLCRLGMCWQIVQGTAIPTSAGLMIVTVAHQPSDDAPRRPFSVPRAVNSPTQDQGCSPPHA	NA	NA	NA	No differential expression	Not secreted	NA	NA	NA	NA
Lactarius akahatsu	Lacaka1|MSTRG.2075	658	131	MGLLDCTFSSDLLPLPVKHRRTIICAKAIDPAQIPGAIVILNFLLSQDQYRGPLSAEVLQIVRGWGNNSGENTSLIAQATATYILVRAQMRDDTWFTLASNELGVPETILRDHAANGDSVSLAILIHIFRP	NA	NA	NA	No differential expression	Not secreted	NA	NA	NA	NA
Lactarius akahatsu	Lacaka1|MSTRG.2968	2377	131	MSDRKAPPPTSPRPRPPPPTSKPVIQPRRPGSTSGTAGSSSTTAVVPSSLFTTLTKPTTEGYPATEVIKYLIEVVGRDVVSFRRNAQVSYMLVDRARDICDAINTHIKKTESGIDWSSFEMFTDAIDPVEE	KIK09042.1	1.6e-07	hypothetical protein K443DRAFT_672081 [Laccaria amethystina LaAM-08-1]	No differential expression	Not secreted	NA	NA	NA	NA
Lactarius akahatsu	Lacaka1|MSTRG.5148	5819	131	MSDAIFSNALAWAINGSSVYSANVANWINTWFLAPDTYMSPNLNYAQVVRGPGANTGTHTGVLDLKCMTKVVNAVLVLRAGKAPEWTDTIDTGLVNWTTTYIGWLTSNKIALEEAASAKCVASSRIARTSS	RDX42880.1	9.5e-40	chondroitin AC/alginate lyase [Polyporus brumalis]	No differential expression	Not secreted	NA	NA	PF05426.13	Alginate_lyase
Lactarius akahatsu	Lacaka1|MSTRG.6698	1765	131	MEHCSIRAGTFNVNGKLPFQDLSTWFGAMQQFSDTQSDKQRHLTPPSGEPSVGRSSVLPLEEQNDKASTTSEPDLLVVAFQEVDHSTEALFYTTGPAREDAWTAAILAALGEKAEKYEKVISRQGASTIDR	KIL66111.1	7.1e-19	hypothetical protein M378DRAFT_192118 [Amanita muscaria Koide BX008]	No differential expression	Not secreted	NA	NA	NA	NA
Lactarius akahatsu	Lacaka1|MSTRG.1355	397	132	PRFFRNRSLAPRDLVWLLIWLHGVSAGSGSFSGPSCAWAAPSVVGVCNSPDGKYTKTTNFSREQWEEISNVHTRDIWSVEPEKLRVIQADIDTAVNRIRSCKPTKHVKRETSRSVKKSRGDGHEYRIASSDS	NA	NA	NA	No differential expression	Not secreted	NA	NA	NA	NA
Lactarius akahatsu	Lacaka1|MSTRG.5145	1572	132	MLHVTASSRSFPALKCHHRVSSLSLRTLLLDLITSLASHWPHSGPHLTLGMLFFLIRVSPLQPAFLALHDRSGVVPCRWSCLRKVGDMYVVSLFTRRTHCMAMQLATLHYHHSISHQTTSPRPTSQSRPLPM	NA	NA	NA	No differential expression	Not secreted	NA	NA	NA	NA
Lactarius akahatsu	Lacaka1|MSTRG.6048	1530	132	ETISLEEPNAFFPLLDALTSPDAFPAKDKLSPEAQQQLALETALSAGYLSKPGAVEVVQAQLALHAANPKIVAFYEHYSDNAKKTQNNAVADAESCGSWVDWYGEVVCDVERLVHLTGPETLDPAGTSSLFL	XP_009549633.1	2.1e-34	glycosyltransferase family 24 protein [Heterobasidion irregulare TC 32-1]	No differential expression	Not secreted	NA	NA	PF18400.2	Thioredoxin_12
Lactarius akahatsu	Lacaka1|MSTRG.6255	2943	132	MILLYRHFLIQFKEPRSSVSSARRIRNSIFNHQGIDNEVLDLRSPARSWRSHPSRPRLGQKNLSIEIREALCASAQSLLAHTHLITHYLVIYPFPHWPIEQRFMFSLSPCQAFPLFAGFCRTAPYGNTFPER	NA	NA	NA	No differential expression	Not secreted	NA	NA	NA	NA
Lactarius akahatsu	Lacaka1|MSTRG.6700	4458	132	MHDDHRLTVTDWISILTVSTRLIFPKVRERAIKELTSRLEDIDPFDLIGLAVKYDVQQWLKPTYRRIVTRVELITYAEAQKIPFPMAVMLMRSHERYSRLTKDGNHRSSSVIIQSEVTIMEKDLPVDNKKAT	XP_007303530.1	2.4e-14	hypothetical protein STEHIDRAFT_120943 [Stereum hirsutum FP-91666 SS1]	No differential expression	Not secreted	NA	NA	NA	NA
Lactarius akahatsu	Lacaka1|MSTRG.6794	1857	132	MTVVKIPKSGGVRTPGAVTVVLSTDIPVQVVELDVQYRQRIHAQQIYTYMYGQVVSPPRGLSASVIGDADFDGRLAPSSSVIPFGELTFLRIGESEFCCLLPSPLQEGPLTCLSTQNRWHRRLHFRSARRAL	KIK44847.1	5e-12	hypothetical protein CY34DRAFT_802313 [Suillus luteus UH-Slu-Lm8-n1]	No differential expression	Not secreted	NA	NA	NA	NA
Lactarius akahatsu	Lacaka1|MSTRG.7173	2480	132	MMSFVSSNNRSPSYGARPSPSLAPQQLELDYHEAIAAHDVPFPDDFLVGEEFAADPFLNGSSQAFPPAGFRNLRPFVRSHIGEPQRAGRSSPHGAQQPASFGSFPTIHPAVAPQSPFDGTYSLQTHPSSVVP	NA	NA	NA	No differential expression	Not secreted	NA	NA	NA	NA
Lactarius akahatsu	Lacaka1|MSTRG.11572	3426	133	SLSKVLFIFPSRYLFAIGLSPIFSFRWSSPPILSCIPKQLDSSRAHHRSTGIRAKDGILTLYDAPFQETCARSGAEDASLNYNSDGQRPPDFKFELFPLHSQLLGESLLVSFPPLIDMLKFRGSLTRFEVKGS	OBZ63473.1	7.6e-53	hypothetical protein A0H81_15005 [Grifola frondosa]	Induced during mycorrhization	Not secreted	NA	NA	NA	NA
Lactarius akahatsu	Lacaka1|MSTRG.1543	1643	133	MRIVDGYWLPLSSLALAIEHVGIVAYSLSVKRLFDELLRDQSQIALFACPPEHVEQNFSKAFDQAFLRPLCLLDFLRTRLPLNPLGSLAMTPCYTSWFLLDKFIFDVKRLGFNLISVELTNTMASPNASLFGA	NA	NA	NA	No differential expression	Not secreted	NA	NA	NA	NA
Lactarius akahatsu	Lacaka1|MSTRG.4472	1578	133	MLHVTASSRRSFPALKCHHRVSSLSLRTLLLDLITSLASHWPHSGPHLTLGMLFFLIRVSPLQPAFLALHDRSGVVPCRWSCLRKVGDMYVVSLFTRRTHCMAMQLATLHYHHSISHQTTSPRPTSQSRPLPM	NA	NA	NA	No differential expression	Not secreted	NA	NA	NA	NA
Lactarius akahatsu	Lacaka1|MSTRG.4498	854	133	MARTKQPSRPQPSRPRPRRQLAMMSCGGGCVKPEKVVDLSAEIRDLERDTALHPHPESTRSRQEPAMTRYHGVPRAPPAPKQKKRAPRSRRKKVKAPAQTVAEALPLTRPETPPLTRSEAPSPPVVIDLTEDD	NA	NA	NA	No differential expression	Not secreted	NA	NA	NA	NA
Lactarius akahatsu	Lacaka1|MSTRG.6535	4292	133	MSDISSSMLSLTPQYTGTQDSSSPLTKQKNLALRLHSIQMQTFVEKDGNEDGGDSNDEISGVDDDDLPQWARRSVFPDDPLMRTHVLLVAFLPTSLLHHLPGSQYRAEFLNAFSSGQSLCLACNTGVRKSRMP	KIM87846.1	1.8e-14	hypothetical protein PILCRDRAFT_814556 [Piloderma croceum F 1598]	No differential expression	Not secreted	NA	NA	NA	NA
Lactarius akahatsu	Lacaka1|MSTRG.6924	844	133	MRTPVHGPPFVSFFAVFFRLQSLVLLFLIPQTIRTPYSFVLDIAVLLFAPPDPLPWSCARHRGLGRRSLIRASFSTLVLERYIALCLFPSLDFILSLLVLICRPSRSLRAAAFLLRLSFPMTASLRCRSRFPS	NA	NA	NA	No differential expression	Not secreted	NA	NA	NA	NA
Lactarius akahatsu	Lacaka1|MSTRG.8912	1202	133	MLTTPTTSAANLTGRPTHPQLPESGMPSQPLSTVPLPSTAPPDHRPNWEDYTYPTELLRRPRNAPDPEAAPSPQRIPVLEYQWHDELVSHLLEIPPRSNFGGKFAIIADPDVDNGMRAQIFADQLRAQGVPIS	NA	NA	NA	No differential expression	Not secreted	NA	NA	NA	NA
Lactarius akahatsu	Lacaka1|MSTRG.8979	4824	133	MTPDLTGYLFMRCRKRIPSNRRVFIFVQFPDFMKKVAEALTANKVRFLEIKDRAAPKGKNMEKLQDETEERVVLLNVIDESASGTNLTSANRPIFRRCSRRHWRSTRRTRRGPSVASSVTGRRKPCSSDDSQA	EGN96836.1	2.2e-23	hypothetical protein SERLA73DRAFT_93465 [Serpula lacrymans var. lacrymans S7.3]	No differential expression	Not secreted	NA	NA	NA	NA
Lactarius akahatsu	Lacaka1|MSTRG.9570	3209	133	MVLSLVMQDFLGKGMHPTSSMVFREWRKLRGCITSSAAGLVLDVIHLARPWAPCQCLEQPRLQPHSRQDLVGGQAASFFGDAPTPFASQSYMSPPSYPGGPPVPQSQSPRPPPHLGSTSWARARARISFSHSA	NA	NA	NA	No differential expression	Not secreted	NA	NA	NA	NA
Lactarius akahatsu	Lacaka1|MSTRG.10659	1956	134	GLIDEHRPSSGTPALFAYTGQSNITNSKPPLAVLAHASMRGFTTLLDAAALAPTTPIDLTNTPVDAVAVSFYKMFGFPTGIGALVLAPGVGAWLREKRPWFAGGTVDVVQVPGLAVGRTAAIDEAFEVSVASLY	XP_009553088.1	6.3e-39	hypothetical protein HETIRDRAFT_68211 [Heterobasidion irregulare TC 32-1]	No differential expression	Not secreted	NA	NA	PF00266.20	Aminotran_5
Lactarius akahatsu	Lacaka1|MSTRG.6047	564	134	DTGSARSRFTFLHNPASPNSDPGRHTHVSSLFSHLVYKDLLSKATASQLLQALGPRGDSGSRQDGQTVLSVASPLDEIAGGVALADIDQDDYQRYVHTGKLVAKMAGLAPGASGLFINGRVMSIRMSVCLYLLT	KZT07030.1	1.7e-12	glycosyltransferase family 24 protein [Laetiporus sulphureus 93-53]	No differential expression	Not secreted	NA	NA	PF18403.2	Thioredoxin_15
Lactarius akahatsu	Lacaka1|MSTRG.6079	1426	134	EGIDWQVSHMAHVLSQFSATLSNVVHLKLKAELEDHQLKDTDDVEWLHLLRQFSTVQTLHVSRKLAVHVALALEDTTAEMATELMPSLDLICVAGQPASSIEKFVTTRRLSGRPVTVINTGTEFDRRLESYVGK	NA	NA	NA	No differential expression	Not secreted	NA	NA	NA	NA
Lactarius akahatsu	Lacaka1|MSTRG.6295	919	134	MQVPGVAHVLCQLVPSFSNVGHLYAHGGHVSRQMNIADWLPFFHLFLAAETLHLSGGVAAYITSALEDGANSEEMTTNVFPALHLIWLGETTDFYEDSNCDEPVGPIERFLSSRQLSDRPATVINTEADFNRRY	NA	NA	NA	No differential expression	Not secreted	NA	NA	NA	NA
Lactarius akahatsu	Lacaka1|MSTRG.7005	505	134	IALGSEDGTGDRGDPLLLDTRIRSVGFFSPNGLHLVTERTTSGNLSLLSSRLLCFHLVPLFVTSQETTLQAIHIGDRRGLGGPHVRRSVQTRTRVHHAPPRSSLYCSSSFPALRTVIPRLAQSWCSPSCITFLC	NA	NA	NA	No differential expression	Not secreted	NA	NA	NA	NA
Lactarius akahatsu	Lacaka1|MSTRG.7109	802	134	DPSMDVSNSGTSLRLPLKRSQRGEHRIDDELVFSNHRGYVFHDSRGIEAGSAGELDILREFIQSKCGKGRLRDRLHAIWLDSRVFAITTTDRHILRYCVPMDNQRPQLDLKYFKDICPEGNGASLRRFVTEFNK	PPQ80101.1	2.5e-27	hypothetical protein CVT25_001469, partial [Psilocybe cyanescens]	No differential expression	Not secreted	NA	NA	NA	NA
Lactarius akahatsu	Lacaka1|MSTRG.7280	6114	134	MRLLREHRSGELKKMQREMRSIISGAVSRNFDPSSVIADETPSAEVVALVGRAKQVTNWRVAEPSSAQLQDALALREVRVMTTYRPLLLRAGTAAARIRSDMFRMLAQTRQPTEGGPIGEREIFWDGIVLPSSL	NA	NA	NA	No differential expression	Not secreted	NA	NA	NA	NA
Lactarius akahatsu	Lacaka1|MSTRG.8252	1978	134	EHSSPSAYGAIIRKTEVTPACNTYALAQLQRKSWCCSMHDGPENKPMNVNEDGNEDEGRGRWDWYRLSSIFQISQSSGFAKSTPRYSRYLTALDSQRIHPAIATSVLNSVVISTVIITGQPGIGERFTVRSYPY	NA	NA	NA	No differential expression	Not secreted	NA	NA	NA	NA
Lactarius akahatsu	Lacaka1|MSTRG.10476	5317	135	MEAEELKSKYPSYQIEMVRFKRAIETLERGRALLLSEMRGLRITQDQLRAARPKLGFESVTMSVKRLVVSLPRRDFWTLIGLISHIQCFPGFGDFLKLPSRFDTAVAHGPVIIINQSKWRSDINVHHHPTQIEPD	XP_007270439.1	1.5e-08	TPR-like protein [Fomitiporia mediterranea MF3/22]	No differential expression	Not secreted	NA	NA	NA	NA
Lactarius akahatsu	Lacaka1|MSTRG.1750	1816	135	MTTAASSPSLVRIQATPARQLPHHSQHPVAHAMTLLPPSPSTTTARRWQCKVTKMVTTMCRGSGLPEIKPEIFRDFHSFSVITLCFTLCADVRESARVTIPIGSIPGHAVSLNSHKLMHKYRPIQTVDANLNIPY	NA	NA	NA	No differential expression	Not secreted	NA	NA	NA	NA
Lactarius akahatsu	Lacaka1|MSTRG.2975	3001	135	MNTGRNEGVKRGGYQDAEGWTRPCPDSHSARSPPRALDQNAARAHAPAPAGCHRATSPTWQRAPQGAAGKASRGVDEDANARAASRGRAAGVCGAAAQDRGCEHAPGTGRRVRGVTPAAKGWWRRRRQRRFTARW	NA	NA	NA	No differential expression	Not secreted	NA	NA	NA	NA
Lactarius akahatsu	Lacaka1|MSTRG.5245	862	135	MITKPPPTRVQHAFPPRLVSPTLPSPHHLVSLLVTLLLRPNMITFPSPVGTHEHPLFLKNDFPRDVVKGPASENLSTILHSTHPSPLLPSSPRDLGACLHPRPLNGPERRSLPRAKARPDFHFILLPFSHPRSST	NA	NA	NA	No differential expression	Not secreted	NA	NA	NA	NA
Lactarius akahatsu	Lacaka1|MSTRG.5276	1051	135	MITKPPPTRVQRAFPPRLVSPTLPSPHHLVSLLVTLLLRPNMITFPSPVGTHEHPLFLKNDFPRDVVKGPASENLSTILHSTHPSPLLPSSPRDLGACLHPRPLNGPERRSLPRAKARPDFHFILLPFSHPRSST	NA	NA	NA	No differential expression	Not secreted	NA	NA	NA	NA
Lactarius akahatsu	Lacaka1|MSTRG.6661	521	135	VSGNFVQIPDWGNLLLDAGEGTWGQMARYFGTDPAQPSNVWQALRDLKCIFISHGHADHHAGLAKILAMRKQVLPLAYTLLSTLTGIGARPSAPGTSLPHLDTNGAPVPARTCRLGKPWVIGFDGHAKWRHTHPE	KIJ09075.1	2.4e-22	hypothetical protein PAXINDRAFT_172647 [Paxillus involutus ATCC 200175]	No differential expression	Not secreted	NA	NA	PF12706.8	Lactamase_B_2
Lactarius akahatsu	Lacaka1|MSTRG.6662	4930	135	MHSRRRARNGRFHPLPTIDLSVFSRIDEVISGRSEGEKILFRSPDSDPFGFLILPDMKWDLTSTASLYLVALMLLPDIKCLRDLTCLHLPLLRSIRREATNAVKTRWGLEATELRLFVHYQPSYCGSKFLSLSRN	XP_009552117.1	5.1e-28	hypothetical protein HETIRDRAFT_329514 [Heterobasidion irregulare TC 32-1]	No differential expression	Not secreted	NA	NA	PF11969.9	DcpS_C
Lactarius akahatsu	Lacaka1|MSTRG.7279	1006	135	MITKPPPTRVQRAFPPRLVSPTLPSPHHLVSLLVTLLLRPNMITFPSPVGTHEHPLFLKNDFPRDVVKGPASENLSTILHSTHPSPLLPSSPRDLGACLHPRPLNGPERRSLPRAKARPDFHFILLPFSHPRSST	NA	NA	NA	No differential expression	Not secreted	NA	NA	NA	NA
Lactarius akahatsu	Lacaka1|MSTRG.8589	1074	135	MLTPLRHKENVSARKQRSPKGQEQVNAVVQQGPTLRKQPTSRSITRKPSALGDRTVQMRNAENSRVGPLDKSVNETDRSTGSVRNRMREWELERARLREMERVGESDNQQEEERPVPVRKPSRLRDNASPVTESP	NA	NA	NA	No differential expression	Not secreted	NA	NA	NA	NA
Lactarius akahatsu	Lacaka1|MSTRG.8700	1832	135	MTTTPVLLLLSRLSSVQALQQLAPLIVIIVVPLFVLSGRNYLRSIPPFVSRMLAVASSALPWNWSSFYEHRSTPDPRKILPIRTRAEQLAARTDGCPGACRQVAYVLSSTHDRQMSRRVAHSIPGSLTSPAHIAS	XP_009543912.1	4.4e-08	hypothetical protein HETIRDRAFT_444128 [Heterobasidion irregulare TC 32-1]	No differential expression	Not secreted	NA	NA	NA	NA
Lactarius akahatsu	Lacaka1|MSTRG.9839	899	135	MITKPPPTRVQRAFPPRLVSPTLPSPHHLVSLLVTLLLRPNMITFPSPVGTHEHPLFLKNDFPRDIVKGPASENLSTILHSTHLSPLLPSSPRDLGACLHPRPLNGPERRSLPRAKARPDFHFILLPFSHPRSST	NA	NA	NA	No differential expression	Not secreted	NA	NA	NA	NA
Lactarius akahatsu	Lacaka1|MSTRG.10048	1572	136	MLYLTVIVSPNSTSSPAFAANLRPTEVDDLPSGEATRPSMAQVSTNTTRSTVTTGSETLSPPTVHLPGDTNILPPAADRRAGMSPAENALHDADEAITTINLSNTLEGALERIKWVMDAVSSVAEVRAMSFLSILH	KIM45626.1	1.9e-06	hypothetical protein M413DRAFT_344802 [Hebeloma cylindrosporum h7]	No differential expression	Not secreted	NA	NA	NA	NA
Lactarius akahatsu	Lacaka1|MSTRG.112	3102	136	YIASGSDDRTIRVWDSTTGETVAGPFTGHTDSVRSVAFSPDGRCIASGSHDGAIRLWSVTTRRAETIGDADFTDDSVINDEGWICGGAGELIVWIPPIHRAHLHRPSSIWVAGENETRVDFSASAHGHSWTTCINT	OCH83642.1	2.8e-18	hypothetical protein OBBRIDRAFT_528426 [Obba rivulosa]	No differential expression	Not secreted	NA	NA	PF00400.33,PF12894.8	WD40,ANAPC4_WD40
Lactarius akahatsu	Lacaka1|MSTRG.11222	657	136	QRLGHKPFIIYSPSPHCRTRGRVDDVSNVVEDVRFLSTFIMQGNRMKRQWFEDSSDVDLWATGRANVKSLQVEVDEFLHELEDLITRRWNPGRIWTFIERSRTMKIGPCPGTLSISFRLPFKMSSLGCRVPFSCVL	NA	NA	NA	No differential expression	Not secreted	NA	NA	NA	NA
Lactarius akahatsu	Lacaka1|MSTRG.8428	2906	136	MSESREIMDDTHRDAHDPLIVNEYFVVPVPLLARRFAVRKRRDNIVQKLIALLDLARLRDHLQPSLARRRALWFRARARRTRSGWKSRMTIGFPAPTSIMHREDALREPPGRQGARPCSQSVQRVTEGPQASHGCS	NA	NA	NA	No differential expression	Not secreted	NA	NA	NA	NA
Lactarius akahatsu	Lacaka1|MSTRG.11207	531	137	MTPIIRNPSLPLLPSRKTSRQNLMFGALLLIATTNLPSGEPFPVVVDQNTTIHELKISVVPLARNPRLFRTLPSDIGIWRCKGLSAKYPLNRMKKLLSDFKFSDDEPEDSDIQQLGVAQKVKELNLNDDEILLALLL	NA	NA	NA	No differential expression	Not secreted	NA	NA	NA	NA
Lactarius akahatsu	Lacaka1|MSTRG.12049	529	137	MTDKMVQITVEILDILATTTKEMEQSRASEFDHCLTLLGANINSENFLKKVAGRTDLEDGLKKLDKLTNEEVVMASVQVLKVTHKIDNKVTGVGEDVRNVDEKVQVVKGEVQVVKSEVQLVNDNVKSVDDKVQAITD	NA	NA	NA	No differential expression	Not secreted	NA	NA	NA	NA
Lactarius akahatsu	Lacaka1|MSTRG.12185	2150	137	MTDIIVKIMVEVLSILGIVTKEVGQGRTSMSFPFDQFPEIDRHVEAYLKKLVGRKDVEDALQRLDALTQEEARMAAAEALTITRGIDDKVKDMHEKVEGVDERVRAIDIKVDGIDDKVRTVDSKVQGVDHKVSSVIQ	NA	NA	NA	No differential expression	Not secreted	NA	NA	NA	NA
Lactarius akahatsu	Lacaka1|MSTRG.4839	659	137	MENGTCATIVSLFQANVEDLKAIELERRFGSAPELKVSDIMLTEDEYTLHRKCLIHTILRIVVQYGGPRLQVFRKDLQAMEPHSDFRIDMHKSEIHPLPAMNINEASTMGNAEVIDAVMVLRYARNGLLLYRYDPLV	KIJ59407.1	5.5e-30	hypothetical protein HYDPIDRAFT_162408 [Hydnomerulius pinastri MD-312]	No differential expression	Not secreted	NA	NA	NA	NA
Lactarius akahatsu	Lacaka1|MSTRG.5175	1481	137	MMENELTFVAPEGVYSVTEDHKPFPVTHNAPAPIFPTRLSTITVRFPAPKQPATPGLGQLLGGGKDFWKEKGLTPGPAREDGVSVSSGETPEDATPARCREFTGCRSPNLDGQSRSEPRAVQPARGRQAQGVITSET	XP_009542877.1	5.3e-25	hypothetical protein HETIRDRAFT_309667 [Heterobasidion irregulare TC 32-1]	No differential expression	Not secreted	NA	NA	NA	NA
Lactarius akahatsu	Lacaka1|MSTRG.5177	1596	137	MSSLSQCFPTQSPRGIDAGGTHSLRRESARFSVFVQLFFGTMHFFLCAIKTKPSLEKLGSTHSSFSTDLHISSRPRTISDLLKDNHRLPRPGAKEGTYAWGQALVAPVSDIQLLATRTVQERQWPPGRLIQLFSPLS	NA	NA	NA	No differential expression	Not secreted	NA	NA	NA	NA
Lactarius akahatsu	Lacaka1|MSTRG.626	3742	137	SASTADQLPRVTENSNKRTTVMYACTLALTIRRPNISGALSTRYRFSKLVFARPALSRHFQLIHLIAHPFSSPVSLVALSPLARVVNVSSLRPLSSSVAVGSHHDNIMQRAALLLSTPSRCSSSHPGLHPSGSAVLR	NA	NA	NA	No differential expression	Not secreted	NA	NA	NA	NA
Lactarius akahatsu	Lacaka1|MSTRG.6676	4540	137	MFQHKGRVRIALDKQSAESGGVDRLLEETLAAGAEDFDQNPGSGEDVEVEVRRLCPLHLHNNLDVRRQILCAPNALGKITNAVTQSGLAQGLLSCELIYAPTEDPVEDDELSSTVKGLVSDLEENEDTLRVWTTLDL	XP_007862877.1	2.8e-18	YebC-like protein [Gloeophyllum trabeum ATCC 11539]	No differential expression	Not secreted	NA	NA	PF01709.21	Transcrip_reg
Lactarius akahatsu	Lacaka1|MSTRG.6792	1147	137	MKEADTNYLNVLTDLFCPMSKKRIKERGMGEVEESKYVERLSQALEATGTLDRVALGCFEHYANLHQHDATFARYIKANEWLVAYDVLSGSMRAEREYGVLQYLSYALVPFFPLFQERGGSRVERPKADWEVGPLSP	XP_009542898.1	9.9e-48	hypothetical protein HETIRDRAFT_308576, partial [Heterobasidion irregulare TC 32-1]	No differential expression	Not secreted	NA	NA	NA	NA
Lactarius akahatsu	Lacaka1|MSTRG.6827	439	137	THRSPSTTEMCSMPPTPVSSESLTSDPSLNQGTPPPFPQSTESLHTLTQKYITMLEENVQTDMGNVVVGADNEIDSTEKRKIVDCFDFSSDTWTAFFQRSATGSLEDKMELYDLLDLDAEGDLDYDLDDCVESVFTS	KJA13706.1	3.7e-10	hypothetical protein HYPSUDRAFT_151286 [Hypholoma sublateritium FD-334 SS-4]	No differential expression	Not secreted	NA	NA	NA	NA
Lactarius akahatsu	Lacaka1|MSTRG.7138	5417	137	MKIEDVSDSQVWLSGRHSLALLPNLVSSACDCPQVCLLHAFNTLAPICGVHPSERAQLGDAGRPSSRARVCGHVASAGSKDDQVSGRQGSTEHLCEVQEYLRLHVLSKGEYYRQGYIPIPGDRVLRFRVLRFDQFFL	NA	NA	NA	No differential expression	Not secreted	NA	NA	NA	NA
Lactarius akahatsu	Lacaka1|MSTRG.7275	3454	137	MLMPCSDETITELELRPDTVTGESSVTPIGDNRCTIPDPRSVTYIDYEDPFSLVNQSLGTSPHIAQLSRNAWVSCGDDIYVLECLGKGHIRIEPVPGGERVLHKASPSPFDFAFPQTTNDISTRIIPQQFILKRPPL	XP_009540850.1	7.2e-22	hypothetical protein HETIRDRAFT_456722 [Heterobasidion irregulare TC 32-1]	No differential expression	Not secreted	NA	NA	NA	NA
Lactarius akahatsu	Lacaka1|MSTRG.742	3497	137	MLELVDRNTDKAFPRRQERCIGVSLRSNPLHVCSQPPPPPPPPPRAASIATLWERPRIGIRVGHHFAVTSKALEPLEEERTGTVIRPRSPWALKRVIFAFSTYFLRSLALTHTHPRFLYAFPRFAAFPRASSLSRVL	NA	NA	NA	No differential expression	Not secreted	NA	NA	NA	NA
Lactarius akahatsu	Lacaka1|MSTRG.7918	5791	137	MASLLERMNVDTAPSVGPVRSKTRRADSAPYSRPPKGDINSPWKHDMYQQGSESGKSLSDRLGAPQKDTPPKMNFGGAVRALKEATGSATDKELSIRGASTRGNVVEVTGLVKGTTAEDVEVSDYITCGTDLAIRWQ	XP_009553415.1	1.7e-31	hypothetical protein HETIRDRAFT_482766 [Heterobasidion irregulare TC 32-1]	No differential expression	Not secreted	NA	NA	NA	NA
Lactarius akahatsu	Lacaka1|MSTRG.7922	1050	137	MRDIIVKIMVEVLEIFGIVTKEMKQGRASESIRNDALLVADINSEKYLKKLIGRRDIEDALGRLDKLTQQEFQMAVVQMLKVAHHVKDGVTTVGEQVQGVDDKVKDVNDNVKGVDDRVKGVDDRVQDVDDKVNVAIE	NA	NA	NA	No differential expression	Not secreted	NA	NA	NA	NA
Lactarius akahatsu	Lacaka1|MSTRG.10191	1859	138	MILTEAAEPEHPGAGWKCTHRDEPYAFEIPLKDGMRGVAPYIRFAINQRKQAVTLGTEGRGKPQYYKPLYAIPMPPRPLAVIAPGHSLSLFTDEHPARHEIDHALTIAADPGLLADVSRFHVSVRKCGPSIISGATGS	NA	NA	NA	No differential expression	Not secreted	NA	NA	NA	NA
Lactarius akahatsu	Lacaka1|MSTRG.3120	4855	138	KIANPIYVVNWVDLSWTSSDQIEDEVYYISEADSNQAGFDSFMMANRTLPHLSILCGNHPDIIKKGKKGHLTPFFSHHSLLLRANRHFVFVVPTRYWSEISYPQPRNTVAKELAGIQYRHWARPGPSIFFITSAPQTP	NA	NA	NA	No differential expression	Not secreted	NA	NA	NA	NA
Lactarius akahatsu	Lacaka1|MSTRG.5372	924	138	MVSSLVPFVVGLRTPLHGFLTHLCAAPSPLGVIPLTLGLRMSHNMDAPRFLDPRCTLCFLHFSPFSAECLPTCSTLPHRSCTPLSLNSRARNIQHTTEPALLARDRMELGGKTHAGSRLRTMMKVTKGRLRERCDLQA	NA	NA	NA	No differential expression	Not secreted	NA	NA	NA	NA
Lactarius akahatsu	Lacaka1|MSTRG.11619	1512	139	MQGPTPFIPRYFPGTVPLAPPPYIGPPSIDGPAPLFYHIPPHRAPPAAALDAAHDTEPLDIPPSFSVAVSSSEPPILANPMHQTIRRIPPPRLVEDGQIGTARRCSPPPHRPYCPSATIPTIDSLGYPSFLTHSLGSRQ	XP_009548248.1	5.4e-09	hypothetical protein HETIRDRAFT_435056 [Heterobasidion irregulare TC 32-1]	No differential expression	Not secreted	NA	NA	NA	NA
Lactarius akahatsu	Lacaka1|MSTRG.2901	2453	139	NNTYTVHNFSEYPEASVMGSDSNTAFQIPLLHGFSVTLSVHTGAHPLPPPGVFNWHYLQCVVNRFGMYSGFPDICFFIYRFRTSSDSSDVGDFDADPPYPSYPIESALAHQMESHQAMEREKEILQWASGVPCASGVSE	KIM41748.1	3.3e-22	hypothetical protein M413DRAFT_27333 [Hebeloma cylindrosporum h7]	No differential expression	Not secreted	NA	NA	NA	NA
Lactarius akahatsu	Lacaka1|MSTRG.2967	4416	139	MSMRTRRKSKAAAAAAAELDAESVAPSEAGTAGQTRVEFSVPIPEDLDFDYLSRVLPDVSFDTPSPDSVLSLYRLVVTQAVGLENAHHDLEESRAENERKDVELDQALQDRESSVSSLETQVKGLQEELTKVKQDRDAL	KZP18619.1	2.9e-18	hypothetical protein FIBSPDRAFT_590527 [Fibularhizoctonia sp. CBS 109695]	Repressed during mycorrhization	Not secreted	NA	NA	NA	NA
Lactarius akahatsu	Lacaka1|MSTRG.5369	3555	139	MHSSVWSTASTLWDSPLFTGLPTRHGRSLTKGQLMSLKISQSSPLSPLNDEKLHYHNHLQTILTMLFYKPLVSLVTAIALTSTVTASATPVRGTDSRQCDTQTHYLYCCKGGVVWLVGLDCVLNWEIWYFLDFRIQLVS	NA	NA	NA	No differential expression	Not secreted	NA	NA	NA	NA
Lactarius akahatsu	Lacaka1|MSTRG.6475	1763	139	MPHNARAAAMLLECMPTLQHAEWRHLDPEMLSTDALLLALRTLHVREVSDSSDGPGCALLSAVLLSALEALMLVRRGAALHRGSVIREHPDARAHRAVVLACAYPRSIVGTTRNTRPPRPRQSTGTHSDVLKISGANGT	NA	NA	NA	No differential expression	Not secreted	NA	NA	NA	NA
Lactarius akahatsu	Lacaka1|MSTRG.7923	1810	139	MTELEFSLGTFVSEGKGKRSGGLDAAGAEYRALRALRPLLFLETARLAERSATAGLPPLVVLHHILVRAPIPLPHMLHGWQAPEYVRWVEEHSEAEALTLVEGGLAHWEKTNEMEDADGDPVAEYLALARSVLASARKT	KIK67031.1	2.6e-43	hypothetical protein GYMLUDRAFT_156005 [Gymnopus luxurians FD-317 M1]	No differential expression	Not secreted	NA	NA	NA	NA
Lactarius akahatsu	Lacaka1|MSTRG.9635	1752	139	MPGLKLAFTLAVAAYVIGKYFLSGKDDDDALPPPRDSYYPSYPYNSGTTTLTQAQQSHRPPPPPSYTQPPPTTNNFTARLQPRLPHLLTTVVASSTQVYPTLERLVSHSRRSIRSILTIRAQPGLPRLMTTVMASITRV	NA	NA	NA	No differential expression	Not secreted	NA	NA	NA	NA
Lactarius akahatsu	Lacaka1|MSTRG.12461	1474	140	METETAPLEASLPQCHPNPDTPPKLSLFDDPDADIVIQSCDLQEFRVLKLDVIRNSPVLGDLIQSATIDSSGSSTSTHAEGLPCVRLPENRGILSSLLSFILPVPPILPPTAEKIMKLLSVAQKHQMTRALAHIRGAVAS	KIM90357.1	1.1e-06	hypothetical protein PILCRDRAFT_812095 [Piloderma croceum F 1598]	No differential expression	Not secreted	NA	NA	NA	NA
Lactarius akahatsu	Lacaka1|MSTRG.2726	23049	140	MVTVTETNTDSDAISNDTLSLGTTTPAGAFTAASLASSAPIRGPTLQVALAHVRPLPSFGLLTPPDYQFPQEHAAPYNEIALVSTTVVKETRPSVNPVIIVSPLPTPPLTPETPAKPSPANSTHVVSPAGAPNFPEAYRP	NA	NA	NA	No differential expression	Not secreted	NA	NA	NA	NA
Lactarius akahatsu	Lacaka1|MSTRG.2971	1981	140	MSDPRATDSNPKSRPGPGPGLGPGPRSNPQVSSPPGSIRSTSGPSQGPSSVTAVQSPSLFDTLTKPTTEGYPATEVIKYLIEVVGRDVVSFRRNAQVAYLLVDRARDICDAINIHVKKTESGTDWSSFEKFSDAIDPVEE	KIK09042.1	1.3e-07	hypothetical protein K443DRAFT_672081 [Laccaria amethystina LaAM-08-1]	No differential expression	Not secreted	NA	NA	NA	NA
Lactarius akahatsu	Lacaka1|MSTRG.6803	541	140	MLSRLFLQVRANAYHINAHSGVVRLVHYGNRSVSLEMFGGPSSLVIQADGLGEENKSKVKEALCYLSPEQTGSMETTSDDHRTDLYSLGIMFWSLLVGRGMLPFEGGPLEILHSIAQKRPMPVHEVRRDVPQVLAQIIEK	KDQ54896.1	7.3e-54	hypothetical protein JAAARDRAFT_196280 [Jaapia argillacea MUCL 33604]	No differential expression	Not secreted	NA	NA	NA	NA
Lactarius akahatsu	Lacaka1|MSTRG.7894	6852	140	MIASANAAVLCDSLSSTRWAMRVQLSRLRADCEVSCEKRSSRRMASRHRVASERRQGGVGYGVVDDLWGIGEMDAGDTGESEEVGFIRVGTGTDKAGDAGGDSPLVDGGVSLVLDEGYGGEDGVAGGGLDEAKEGVCELQ	NA	NA	NA	No differential expression	Not secreted	NA	NA	NA	NA
Lactarius akahatsu	Lacaka1|MSTRG.10338	1903	141	MLDFEPSTPAYPPHVQDNDSFFRLQQMQADPLAYSPYSPPYSPAVGGFTLKPPLTPPVPAFAPHPGPQSFNFDPFADEDSSTSSGASERERELEVQRLRRIEFLRRREWMRRVVAWVDGISHGMVSKPLISIFVPRICPLH	NA	NA	NA	No differential expression	Not secreted	NA	NA	NA	NA
Lactarius akahatsu	Lacaka1|MSTRG.2933	5801	141	MSSLFLALVLYPEVQKRAQAELDSVISRDRLPTYDDKSRLPYIEAMSRELLRWHMVTPLGADSPFRSTATCTNTYMEVFATRQLMITSIRATLFQKVCNHLSMLAEVVIKVLSAVGAVVIANAWCATIIRHSCSTDSSETD	ESK86760.1	6.7e-15	hypothetical protein Moror_15178 [Moniliophthora roreri MCA 2997]	Induced during mycorrhization	Not secreted	NA	NA	PF00067.23	p450
Lactarius akahatsu	Lacaka1|MSTRG.9525	5143	141	MGMIPIGLWNTLIVISFSVRPLHQHKYFCLKLKRIGTELLGGHLPDFASAIAGQTILRSLTGTVFPLFTTQMFVNVGINWASTLLGAIAVLLVPMPFLFYKYGSHIRTRNSFTPCTDLKVAKFLEQEKEGAVKRCVQQMAY	RDB16604.1	7.9e-24	hypothetical protein Hypma_002799 [Hypsizygus marmoreus]	No differential expression	Not secreted	NA	NA	NA	NA
Lactarius akahatsu	Lacaka1|MSTRG.9985	6409	141	MPADGDVRSTPEVEKAKVDDDDDGEGGGVGVEGEGEVEVGIEDDGDDESGDEAAEADAMPTTASPEIEERPLVLVVQKIDTLKVGGRLAVVFSAVGCVPGDFHPLQTQLTAPSAQCDGLVLVCVASRPCGGVGRPTRRACV	NA	NA	NA	No differential expression	Not secreted	NA	NA	NA	NA
Lactarius akahatsu	Lacaka1|MSTRG.10652	1209	142	MHPAQTTDIPNIPVWQSRELTLVDRVPQLPNKMVYKLSYQTDGRPSEGTLLSRFFGQFGIVDIIGHHVCTAEESFGSTAHHLLNAQFWKVVDDSPVRSPEIKQLHCTAMSLEGLPLLDTSDEAAGIPTPAGLVETILHSMIG	NA	NA	NA	No differential expression	Not secreted	NA	NA	NA	NA
Lactarius akahatsu	Lacaka1|MSTRG.11495	427	142	QSLVHVCQRWRQITFASPCYLDLHLYCSYRTSFRENLSHWPEFPLTVHYFIPDDEGDLIAALKHPDRVRCIEIISSSAGREVFAAMQVPFPTLTRLELTGSANHVPYLPDRFLGGSTPCLQHLRLEFISFPELPTLLMSARD	NA	NA	NA	No differential expression	Not secreted	NA	NA	NA	NA
Lactarius akahatsu	Lacaka1|MSTRG.5477	1849	142	MVRGVLHTVQILQQQSASLSKVVELNVVGPAAPSNEPPFGRSLYGGSMFGETLFGKPLLELPGVPDRIDRFDWVEFLCPFIAVNEMVLRVEVSENIIHAKREMDTHVLPVLHTHTFIDQPLPSVEEFVSACQNAGRPDEFSE	NA	NA	NA	No differential expression	Not secreted	NA	NA	NA	NA
Lactarius akahatsu	Lacaka1|MSTRG.5479	7379	142	MNVEGTKFVSRSPPLSTGMSVSHEVQSDVACVFGPFSPYYVTRHPPPRPVNPSIHLHGRESRRAFVLSTWLIDARICGSRGLIHHVYAFLTEFDTPYHKDDKQPITIITISPIGDAFLVRLSSLHLACGQLDAYQIWRLRMI	NA	NA	NA	No differential expression	Not secreted	NA	NA	NA	NA
Lactarius akahatsu	Lacaka1|MSTRG.6801	1306	142	MSFPVQQECIPQAVLGMDVLCQAKSGHGKTAVFVLATLQQLEPVNGEVSVIVLCHTRELAYQIKNEYSRFAKYMPDVRVGTFFGGTPVSKDAELLKDKSKCPHIVVATPGRLNALVRDKVLDAKNVKHFVLDECDKMLEQLG	XP_009541563.1	2.1e-69	hypothetical protein HETIRDRAFT_438078 [Heterobasidion irregulare TC 32-1]	No differential expression	Not secreted	NA	NA	PF00270.30,PF04851.16	DEAD,ResIII
Lactarius akahatsu	Lacaka1|MSTRG.7261	724	142	LGSPGSGCSTLLKMLTNQRAEYHHVEGEVYYDSFTPEYVAKHYRGDVVYSPEDDIHFPTLTVDETLRFAAKMRAPQNRLEGRLRSEFVTRITDITQTVLGLRHVKNTPVGDAVIHGVSGGEKKRVSISEALALRSRITAWDK	KZV67900.1	3.7e-53	hypothetical protein PENSPDRAFT_583245 [Peniophora sp. CONT]	No differential expression	Not secreted	NA	NA	PF00005.28	ABC_tran
Lactarius akahatsu	Lacaka1|MSTRG.8090	575	142	MLRTLSLRFTLKNITASGMHRPVHRYSFFSTTPRWQANYINTIDTAMFPKLADKPNALKAVSDFNSLTYEIGTEMGAYFRPVFLCGTYSQVADTNSEGLDTTSTAPPSEYEISMLATDKRIVRAAERMIEELNAVGLDVDPD	NA	NA	NA	No differential expression	Not secreted	NA	NA	NA	NA
Lactarius akahatsu	Lacaka1|MSTRG.8094	6917	142	MELKGRLMPNHLAHVLDVMVSKDLAVYEPAKQTRAVLLYWRSPDEWADVLHEWVCVLLLLRISLLTSSPSFPRSCLKATNTGQLNTILTFYEISDPPVPSALSGIPESLLRGAIAVLAKSGRAQLISISDGDGVRFFPPRTK	XP_007865063.1	6.9e-36	ESCRT-II complex, vps25 subunit [Gloeophyllum trabeum ATCC 11539]	No differential expression	Not secreted	NA	NA	PF05871.13	ESCRT-II
Lactarius akahatsu	Lacaka1|MSTRG.8457	1315	142	MPTYHLDLTPFIPILVNGQPHSITLDVASTEPDHQINQNWFLSGLLQVNLDSSTLPTTGNITLYQADDYATSIASESSGDNSGINVIVNASRSIRIEAEIIAGSGEKTKVVFTQNLEYGSVQKYLQNEPPAFPQVCLCETKL	XP_007383418.1	2e-35	hypothetical protein PUNSTDRAFT_102182 [Punctularia strigosozonata HHB-11173 SS5]	No differential expression	Not secreted	NA	NA	PF12222.9	PNGaseA
Lactarius akahatsu	Lacaka1|MSTRG.9642	428	142	INGTRVQKGHTRILRDGNEIAFGSPMPQQNPLDDYRYIYRHLAPHELTGIHAHYDMAHELGKGSFATVMKAMARETGEWWAVKIIHGNKVRGNNNNHNHNQNGGGNQYLQSFAREIGILETLDHPNICRLRETFPPEEGHDF	KZV72852.1	4.5e-35	Pkinase-domain-containing protein [Peniophora sp. CONT]	No differential expression	Not secreted	NA	NA	PF00069.26	Pkinase
Lactarius akahatsu	Lacaka1|MSTRG.10337	1291	143	MAPSNTNTTHAHHTPYLDALLDAVPDDAIPLDLKTASTSHSVPKFVDAALRLASGGSSRQDDEARLRDAWPQIQASLQHALHAPRLSTRARKTQALPPPPPPRKRPPRTKSPKHEEEDDGEEDPPHLTLHALSATAPVRHKVD	NA	NA	NA	No differential expression	Not secreted	NA	NA	NA	NA
Lactarius akahatsu	Lacaka1|MSTRG.6589	2077	143	MNSFPYGNKMYARQVNSSLPPLQRGTVGSRREGPQAITWRLHGWFLCWLLQHRRLEGRCVLIATTPPYRARRRSAGWTPSTFVSSRADRAKQKASRPEDYMDEEDLAELRENQIMAGVKQQQEQQQGVFGVTQPELAQGDPEQ	XP_007304310.1	1.7e-10	hypothetical protein STEHIDRAFT_131245 [Stereum hirsutum FP-91666 SS1]	No differential expression	Not secreted	NA	NA	PF07713.14	DUF1604
Lactarius akahatsu	Lacaka1|MSTRG.6823	5052	143	MWKHTQDGDVLVRTTEYSLPAHLDKHIELIQPTTAFNRAKGQHTTFRFSSVPDVAPSSLSDDKISVEGSGVTVDPSCNTTITVSCLKQLYNAVGYVPKATNKNAIALTGYLEEFANFADLQQFYADQVPAAVGSSFDVVLING	KZV63258.1	1.1e-38	tripeptidyl peptidase A [Peniophora sp. CONT]	No differential expression	Not secreted	NA	NA	NA	NA
Lactarius akahatsu	Lacaka1|MSTRG.896	444	143	LALGLRLSGPSIIYHSPTVPVFIIITCLHTSIIPCLCPVAYCKLVLRVYNASDLMSRDLFTFFGSRLNADPYIAPRQFSSHSLVHSLNRLRATVRPQRSYSISPPFLSTSSLRVGTTKLPNAVIDFDFLPNYLHLRQLASEAE	NA	NA	NA	No differential expression	Not secreted	NA	NA	NA	NA
Lactarius akahatsu	Lacaka1|MSTRG.3654	2060	144	MSAEGQLYNPALFVPSPSSPSGGLHPRHADLALEYLDIVSRHKTPTPPSGIKGHLFKLLRPALAREIDLRDALGRLRGPDLAPYYDVVREMKRRMDRDAEAEETATEGGFLHWVAQPYVRPLPVENETHVEGGSANWLSGLLAC	KIM77104.1	1.5e-30	hypothetical protein PILCRDRAFT_825640 [Piloderma croceum F 1598]	No differential expression	Not secreted	NA	NA	NA	NA
Lactarius akahatsu	Lacaka1|MSTRG.9980	1764	144	RRTSVVQVNIVLNVEVGTPMANFGSALQRRNLHDRVFKVVMHDDVLLVFLDERSRRRWRDITERAIGDRGARLCRNIVGRKRVQTLRGGVRDNAGRRRTALTLHNGREGVYDQHVPHFDPLSRGPIWTENEQVSLVLERLFIFL	NA	NA	NA	No differential expression	Not secreted	NA	NA	NA	NA
Lactarius akahatsu	Lacaka1|MSTRG.11851	5445	145	MGFFDIFGFCVSVLGMYGAVVYLSCLLPRHIIPNVSTMLHDAQDTLARAVAAGAILVNLGQTSRGMAFSLSLPREWCSQPFTQFRERTCAYAYTQPSFSRAIPADPACCSTSAHLQALFPLFANQRCQAEGRGTLDHPSITFPGP	NA	NA	NA	No differential expression	Not secreted	NA	NA	NA	NA
Lactarius akahatsu	Lacaka1|MSTRG.5320	6838	145	MNNGWPWDNHNPLTQLSKAVALFERASRLAAAWRPGALPLLINVQSTNGLEEIPNVDSYYSDFVAVDQRIDEFKSRLTPIERVALCLSNGATIQLHATFCLQNTASRAKCLSAALAIVRASQAAPAHERVYTSPILGVSVPASFI	XP_009547875.1	2.3e-26	hypothetical protein HETIRDRAFT_434963 [Heterobasidion irregulare TC 32-1]	No differential expression	Not secreted	NA	NA	NA	NA
Lactarius akahatsu	Lacaka1|MSTRG.827	3158	145	MRASPYVARKWSPGRRTRLSYPSARARWATHSQPPPLCRVCICVNPCDRFDLCNPFTRAACRRRRHEQTDGHWHKRSLRLRTDLHTFLILKLRAAVPIIQARTREEGLPLDIELNRGAAMPAEDEISDNTDGDIALVLPAKRCRR	NA	NA	NA	No differential expression	Not secreted	NA	NA	NA	NA
Lactarius akahatsu	Lacaka1|MSTRG.9548	1247	145	MLLLSHNPILATSSSSLCSSFSVSSSFPSALIVVADLPRPPDTYAKATQWPCLGSRACSGFIASPILTSITIKLFRPVKLFHCTPPSCLATHHLLGYLQTPARHRRSTRLTVRRRWIRRRIPIVVRHGVLPPPIVCYPHMLTSFT	NA	NA	NA	No differential expression	Not secreted	NA	NA	NA	NA
Lactarius akahatsu	Lacaka1|MSTRG.2941	987	146	MRPLPFVHCFFFWLTTHGYRNLTRLALLAQRVREDPDAAYRGNVHERITQFVAKFEDIALRLKVRIEYLLSSDVAYLSALLQLAHHIRIEQKYRVRVRHTARRAVASPEQVAAHEYNKGRLVKVRGEIEEIKRTLLALCDPRPYRL	NA	NA	NA	No differential expression	Not secreted	NA	NA	NA	NA
Lactarius akahatsu	Lacaka1|MSTRG.6930	7315	146	MTSASDPVNLPSPRPTRSRRPPNRAPATTTKAKVLALQTNLHPEPDKCPPAAVKKEKPKSETYKQAWSISEQHLLERLLTEIPDGEKNRYETPFLPVREGNVNIKIHRWSKISKAMGGRRTPRQVASRVQKYFEKLKLFGVNVERA	KIK48493.1	4.1e-23	hypothetical protein CY34DRAFT_71692 [Suillus luteus UH-Slu-Lm8-n1]	No differential expression	Not secreted	NA	NA	PF00249.32	Myb_DNA-binding
Lactarius akahatsu	Lacaka1|MSTRG.8903	6522	146	MKYVYIRQIFNANSPLVRPHTQRIFLGSRAILPLSSTPLGSPQTDTLPSADERSEQFVAEIAKYSDTYALHSPSVSSQPLPSTILRSLSLMDSAYKWHLHLTLRPLFTALRPPGLFVPFLEPNANEAWARDGRHDSERVRGPKTLP	NA	NA	NA	No differential expression	Not secreted	NA	NA	NA	NA
Lactarius akahatsu	Lacaka1|MSTRG.9818	1922	146	RFCCVFRSDFNRIVRNKCSADHFETRSPILFDQSAFAMEVDPGMATPVGLVVQGASSGPCLRVDKERRRAVSILNVCTCSAICYSTLVQIHVMLRALLSVQKNVPDARTVLFVYAYRTIDAIPSELHPNARLLDEAFPTITVEFVS	KZV64688.1	6.9e-15	hypothetical protein PENSPDRAFT_656347 [Peniophora sp. CONT]	No differential expression	Not secreted	NA	NA	NA	NA
Lactarius akahatsu	Lacaka1|MSTRG.10502	3033	147	RYDRDASRYHQGVYKRKRADLTGTLDSTLLPLFVGQLKNLHKVALVSFKAEVVAGLKVDGYNFADVVGKARAAAEARFSDGAREAVVTEGDAAWQWEEELRLLREEVRSVADILRKDETKKMINTIEVCGESGFCVSDHADSCLAQL	XP_009547662.1	1.4e-47	hypothetical protein HETIRDRAFT_410153 [Heterobasidion irregulare TC 32-1]	No differential expression	Not secreted	NA	NA	PF05879.13	RHD3
Lactarius akahatsu	Lacaka1|MSTRG.12032	982	147	KVVPFPELPTLLLSAHDLVILRLGRIPLAGYISPEAMVACLAALPKLDDFFIGFHDVVSLPARMGPPPMTRTVVPALRSFEFYGISNYLEDLVARIDCPQIKRTEIKYSHEYVDFQVHQSIRRLRAPTIQPGRCFLCLRQHRLQILS	NA	NA	NA	No differential expression	Not secreted	NA	NA	NA	NA
Lactarius akahatsu	Lacaka1|MSTRG.3609	1378	147	MVKEALRWSPATPLGVPHASSADDWYEGMFIPKGTIVLPNMGLINSDPTVFGSDSASFNPARYLDEKGQVKALMEGREEGHVSFGYGRRVCPGRFVAEGTLAIDFATLLWAMRFERPEGAEGELDMHAFAPSGIACVILLASSMCSP	KZT29047.1	1.5e-33	cytochrome P450 [Neolentinus lepideus HHB14362 ss-1]	No differential expression	Not secreted	NA	NA	PF00067.23	p450
Lactarius akahatsu	Lacaka1|MSTRG.4052	4529	147	YEPVPAKIRGARTNYLLVSKKGVAIKGQYFIDLSILPPPPSVSGVAAGAKNLSLSTTSGAVTADVWVTGNNKVRQFSMKLCSDKGHVCAKIVRLPVWVVQNFSLSKTSHSTTSSLMMGANAALPSTSIFGPPRETSPSRYPAFSAGQ	NA	NA	NA	No differential expression	Not secreted	NA	NA	NA	NA
Lactarius akahatsu	Lacaka1|MSTRG.4460	4888	147	MSAPTVINEEYDIVIAGGKRPRPHTLLACLPSVNGTMTGGTAACVVAGRLAAADANLRILLLEAGPTTYNEPAHTQPLNFLSHLAPGSRTSRAYVTQPSTALGGRTTIVPTGQCLGGGGSINCASHVSSPLLTRFGRLIDLDPCGPG	OSC99997.1	7e-23	GMC oxidoreductase [Trametes coccinea BRFM310]	No differential expression	Not secreted	NA	NA	PF00732.20	GMC_oxred_N
Lactarius akahatsu	Lacaka1|MSTRG.5198	5440	147	MSAVLTTSRRVFTLNCLLKLPYIPHLRAAHNGTTASRTVAALASSPTPPATLTSPEPITHFRVTLRRSAISLGKRVQGTLAALGLRRRMQTVYHLHTPEAAGMILAVKELVEVENVPASAVRTAGQQRAERKAPRGFVVVGSRLGLR	KNZ80591.1	5.9e-30	putative 60S ribosomal protein L33, mitochondrial [Termitomyces sp. J132]	No differential expression	Not secreted	NA	NA	PF00327.21	Ribosomal_L30
Lactarius akahatsu	Lacaka1|MSTRG.8976	4528	147	MSLGTPLLGADLPHPRRRSVLCLTFCSNRLIAHTSVRYCTLDAVRAHPFFKGAPWDNLRGSLAPFVPALDSDEDTGYYDDFTSPDDMAKYAEVREKQRNVDRVREKDEPFARGVWVGFTFGKNGPGVKALNSMVDGGNDRSALATIF	XP_012185764.1	8.4e-45	predicted protein [Fibroporia radiculosa]	No differential expression	Not secreted	NA	NA	NA	NA
Lactarius akahatsu	Lacaka1|MSTRG.9713	3351	147	MKMSEATPQLVQGALDELIECLGPRQTGGNAKFPDVFAVFDGAAALTEVRTSSNRSYFIELCSVLHDLGNVSFFALFLSTTSTISQFAMPKGINNSHKVELRKLKSSLPFSDLGFDHLMHNRKIFDKFKTIDDVTSTECIMYMGRPL	KZT12589.1	7.5e-09	hypothetical protein LAESUDRAFT_689269 [Laetiporus sulphureus 93-53]	No differential expression	Not secreted	NA	NA	NA	NA
Lactarius akahatsu	Lacaka1|MSTRG.3611	1653	148	MVKETLRWSPAIPFSVPHASSADDWYEGMFIPKGTVVLPNVNLINSDSTVFGSDSASFNPARYLDEKGQVKALMEGREEGHVSFGYGRRVCPGKYVAEGTLGIDFATLLWALRFERPEGAEGELDVRTLVHTGIGACVFLLASSMLSP	KZV64297.1	5.7e-33	cytochrome P450 [Peniophora sp. CONT]	No differential expression	Not secreted	NA	NA	PF00067.23	p450
Lactarius akahatsu	Lacaka1|MSTRG.3640	5706	148	MRKLVVDLCLCMENEARQQVKRGEAEDVLLPFFGKPERRRQSVLISDGVNPPPSTSAWDTCSTCSSSFVPTKSRNALLIGRRRADLLWKVRRALMDEQLGISRGHNSEVETHAVLDASLMADFAVEDVTIGKISESLFYFWRIDWPQF	NA	NA	NA	No differential expression	Not secreted	NA	NA	NA	NA
Lactarius akahatsu	Lacaka1|MSTRG.4461	2146	148	MDGHKFGVRSPTIRLSKRSSPRSSSSPSRFVGDPTVVPPRKYYTMGIYTVRNLCPLPCSHTRSTHKADTRRNTPSRMDACTSRTPTTSLHPQTLSPITSSRPSLSLAALPIQSSYERFFVYQAGGRAAPDVGLQVHERDRSSNAALPR	NA	NA	NA	No differential expression	Not secreted	NA	NA	NA	NA
Lactarius akahatsu	Lacaka1|MSTRG.6530	3785	148	MAQQSNRPRDFPKRRRASPSSLSSRTAPMLESAPDEGTPAFALPPHIPHPMAAMGDLPGLEFSEADLARYAELYEQGSERWSKAPTEEWVAGADDVLAKFGEMIDMVSFSLLAHLDFNLASLSLHLSDQGPHEVRFSSDVLPSLSFLC	NA	NA	NA	No differential expression	Not secreted	NA	NA	NA	NA
Lactarius akahatsu	Lacaka1|MSTRG.7105	12639	148	MSLTRSSTTFSPHLCVRVSRITHCPTSSAFRPPARLASRLRSLLAVRSTARRYALPTRCTTAFALRHAEGARTLGLAASAAQAGRLTVFERAGASHTPPVGHAGDRGCQDRRRLVASCAVEVTSAEIGITLRGFPFGGALGTRMGGVN	NA	NA	NA	No differential expression	Not secreted	NA	NA	NA	NA
Lactarius akahatsu	Lacaka1|MSTRG.8876	4277	148	MDFVKAFKRFEMKSKGEHEHLMPSFDFQPTYGRVRSLRDRYYLLGIHLAESSGLLDSHIPTKQFRHSINDLRDDIKAILQDTMVITILFPDARPIESLASVNNRIWHGPNQAGCFRELNGENARRLSICLPNWVGNRTTGLVDHTKFW	NA	NA	NA	No differential expression	Not secreted	NA	NA	NA	NA
Lactarius akahatsu	Lacaka1|MSTRG.9829	1084	148	MLPPSFAHVLGDLSRFYAFITKFNRRDILRCRRFAYVPHEGNLSLIPSSNAQYTSHWQCVLAFPRHSASTHCTIDHFVFPVAVPGTHTRTHTLSPSLRAPLSPVSAFMLHYPCAFVSRRCVSTVSASRRVSYATHLPHIFYLVPFCSS	NA	NA	NA	No differential expression	Not secreted	NA	NA	NA	NA
Lactarius akahatsu	Lacaka1|MSTRG.5811	4920	149	MASRMTAPSLMSNSRVGAAYAQTWSYVPRYFSLSRCSPRPKIRATGHTPVFPSLRMLAPECITSDGFISVRPTLQLANTAFPNVFAIGDVADTKNQKAARRAVQHAHVVAENITRLATGISDATLSEYSQVPWMICISLGLVSCRPVVF	XP_007306092.1	3.7e-16	FAD/NAD-P-binding domain-containing protein [Stereum hirsutum FP-91666 SS1]	No differential expression	Not secreted	NA	NA	NA	NA
Lactarius akahatsu	Lacaka1|MSTRG.5822	1188	149	MFASGGMCSGCSGPVRTTTSTTVKQEMSGVQRTRLLKGEVENVRIISATLACGRTTARGKPGPSVMLMAEATHPSHCGVQLLYTPLPSSKNEHEAGGGSYSYDTTCDAACDGIHVRPLSEEVEWCFLTVEVYGGHCHVLVTCVTQHKVS	NA	NA	NA	No differential expression	Not secreted	NA	NA	NA	NA
Lactarius akahatsu	Lacaka1|MSTRG.10029	2941	150	MLFMLAANAGMWNASTGEPFVSNSPLGSLPESNILSALLPSSFAMYTTMLALSHAFIPPSNKDSQRTLTAVMLFTVGAVLGWPFALALAIPFVFEELFVFGDDTVSAKNRFDWQLNRGIRLLLCGAAAVLIPVGIQLFCFLLSLKAHRYL	XP_009540275.1	8.7e-29	glycosyltransferase family 22 protein [Heterobasidion irregulare TC 32-1]	No differential expression	Not secreted	NA	NA	PF03901.18	Glyco_transf_22
Lactarius akahatsu	Lacaka1|MSTRG.10749	4106	150	KPLEDNTVSSREPRSEDPGCCPIPLVPSASTYENIERGREVMAHKPPSILHIRNSVVDTKRTIHHYIIQGKHNLNGHIPIVALSASVALKIPVAKLFARLVRPAKSVERQARSADKECTIERFAALQSVFASAGEIACGAAAPTRGEYRE	NA	NA	NA	No differential expression	Not secreted	NA	NA	NA	NA
Lactarius akahatsu	Lacaka1|MSTRG.3190	5917	150	MTSSESNKPLPLRSVLTKPVVVTTANYAMLALLYSVAGSYIPLVWSTPVEYGGLNLNPASIGLWLSVYGGMGGFFQLVFFSHFVSRFGLRRVFVFSIASCAVIYALFPFENLAVAGGGPNFVVWLLIILQVSSLCIFDMGYGEVFKPHTL	RDX57347.1	5.4e-23	MFS general substrate transporter [Polyporus brumalis]	No differential expression	Not secreted	NA	NA	PF07690.17	MFS_1
Lactarius akahatsu	Lacaka1|MSTRG.32	4791	150	MRVLGPGYVSDYSIIHPASLQTVIISSISDLTNHSGSKITNFAHTPSVCRRLFFHIATFGATPTLSLKQVRSLPHFTVSMLHTSFHAPIAPIVAILCLNLDDTRRLHRHLGRQTHLPHFIPLLLLPRASTRERASLFEYTQSSRFALGPI	NA	NA	NA	No differential expression	Not secreted	NA	NA	NA	NA
Lactarius akahatsu	Lacaka1|MSTRG.3515	4865	150	MPMIALADIGFFARYTYDHRAETSGKNLEVASEWVGWEHLVETFTKVTGRKAVYNRETVEEWISHMEGADKPVAVEGAPGSTSWGENFTGWWNGYRDDLDKRDMDWIRKINPNGYTLERWMTENKYDGTLHKDPVLKVLADGKSVRKRRA	OBZ67001.1	5.6e-44	Glutathione S-transferase 3 [Grifola frondosa]	No differential expression	Not secreted	NA	NA	NA	NA
Lactarius akahatsu	Lacaka1|MSTRG.6691	6119	150	MSPDESEKPLPLRSVFTRPVIITVANYAMLALLDSMVGAYIPLVWSTPVEFGGLNLNPASIGSWLSLYGVMDGIFQFSFFSRFISRFGLRRVFVSSIVSCAVIYTIFPFENLAAVAGGGSNLVVWLLIILQLSLLCIFDMAYGTFLPCLM	RDX57347.1	2e-25	MFS general substrate transporter [Polyporus brumalis]	No differential expression	Not secreted	NA	NA	NA	NA
Lactarius akahatsu	Lacaka1|MSTRG.6697	6777	150	MSQGQGYSIKVLIFQTNPHQNEFFRVVEKTVWNYANGGTWSETDGCDILRMGGSGTSGALRLLSNKGEGCIITLGVHNYKRWGDIITNLKNDQTACVINPQYYSKDFPDREKQRERQLTSYEVADLQGRKFSFEYVVTDGNELTVRVVIA	KZS95393.1	4e-42	fungal fruit body lectin [Sistotremastrum niveocremeum HHB9708]	No differential expression	Not secreted	NA	NA	PF07367.12	FB_lectin
Lactarius akahatsu	Lacaka1|MSTRG.9644	490	150	ISLTLSDGDGQAGRSTPPVTLDLTITVSANGTSPSDPQIIPTEGNDTAAEDVPKPTMAPNSSGPDRPSTLGHLSHPPDRPSVESSTPMPLDQGEASLVEKRRIVLVSADEVEKSIDHSNRLEGVVGRIKWVMDTLNPVAEVRVVFVLPID	NA	NA	NA	No differential expression	Not secreted	NA	NA	NA	NA
Lactarius akahatsu	Lacaka1|MSTRG.1935	3240	151	KETRGSGENLVTRAARHSPGPATLGQGTVDPATESGEEDTNTLSPPIQRGNGKGTLRPTTAAAARGKSTSRADSHASLPRSRTPAKVTRSAIPSKVRPSDSDSDSPSRQNKRPRADTGKGSDNDDDSDDGPKGGTRWRGTKQPIKRVGRQF	NA	NA	NA	No differential expression	Not secreted	NA	NA	NA	NA
Lactarius akahatsu	Lacaka1|MSTRG.4806	6077	151	MALARTSADKFVLLAGAAAHHGGEIRPTPLTPLPDTISPSPFEPPTSASSCPSSLFQSIHPSPESFRTTPFYEASAHHIDDPVTRIATLDAVKAFDASPDVLVILSHDASLLEVLEFFPKADLAGWEKQPSRKDMGRWRFLKDFRKGVLKE	KIM91771.1	1.6e-35	hypothetical protein PILCRDRAFT_811046 [Piloderma croceum F 1598]	No differential expression	Not secreted	NA	NA	NA	NA
Lactarius akahatsu	Lacaka1|MSTRG.7282	817	151	GSADVNPSISVDDVTATAEKALKGTYNGHKTTLEFVVQPSGYAALSHVIQIQNDTAGTWYEAFIDAHDNTLLSVTDFVARASVSSAKRLHSSNSNGLFLLRFSFLVMQYRVLPIHELDPTQGFQTIIDPQDMTASPNGWHQEFSTTTNLTA	KII83791.1	5.1e-29	hypothetical protein PLICRDRAFT_58243 [Plicaturopsis crispa FD-325 SS-3]	No differential expression	Not secreted	NA	NA	NA	NA
Lactarius akahatsu	Lacaka1|MSTRG.8598	5210	151	MRSAVPRRRNPRKIRLSPLVYSVFKTIMKTLACVAPWRAFSSSMTTVTHISSCSKLPTRFSSCMRSSYFFFTLVLIFPSPGDYLKPGEDELEGLKRRLDERLAPPSDSRQFNASHGIDNDWEIGDCLAQWWRPNFETFMVSDVRLDSRRLS	KLO11974.1	6.7e-29	cleavage and polyadenylation specific factor 5 [Schizopora paradoxa]	No differential expression	Not secreted	NA	NA	PF13869.7	NUDIX_2
Lactarius akahatsu	Lacaka1|MSTRG.10495	6774	152	MACSIWDCPYCVVKARQYESTDADVKLKTALQDWRRNQYLSTVGCEDLYGPQLIMTDDILERFVELAHFEEVSDLASIHAQVSWQYIDRWGPQILDIIKTHIPPGPPSLQSAENQPGPSAVRQPSDAQLTSYSSDPKPPCAGDIVGAAAARI	KIJ09267.1	3.5e-09	hypothetical protein PAXINDRAFT_17634 [Paxillus involutus ATCC 200175]	No differential expression	Not secreted	NA	NA	NA	NA
Lactarius akahatsu	Lacaka1|MSTRG.11308	1703	152	WREIIFASPLRLDLQLLCTHGKPQAVWEYLQRWPPTFPVAVDYGYTSGKNPTPEDEDNIFTTLELREIRERIRPFRLSITDGVLAEVIALMRKPFPELRHLAISSYPGRDTRGQGRARPSSYFLGRICPIFTRNLVQRNSLSSITDPPFLHK	NA	NA	NA	No differential expression	Not secreted	NA	NA	NA	NA
Lactarius akahatsu	Lacaka1|MSTRG.11951	606	152	MMTLVLRLIQSAGKTSTILEDAFLVVGSLSAAIEAKFAPYIPAFLPFLYPALKAYEDTQLCTVAVGIIGDITRALGDQTEQYAQAFVTVLLENLSSEVLNRNVKISILACFGDIALAIGPKFEPYLETAMTVLRQAAALQANPVRVSQGLPL	XP_007310728.1	4.9e-48	karyopherin Kap95 [Stereum hirsutum FP-91666 SS1]	No differential expression	Not secreted	NA	NA	NA	NA
Lactarius akahatsu	Lacaka1|MSTRG.3616	2305	152	MRRVTSSSGTKMARPTDCPPLGRKMARFLVSSFSSPLRPHSAQHQPCPPTHLRTSARRSRQIYRASSLHVRPQGTLFHETLHLTRARTARAESPQQPLPPPHKQWYDKLADVLLGDDEQPVSVAASRYALICQKCFAHNGLVKEDMWEDART	XP_009549757.1	1.8e-21	hypothetical protein HETIRDRAFT_441366 [Heterobasidion irregulare TC 32-1]	No differential expression	Not secreted	NA	NA	PF10058.10	zinc_ribbon_10
Lactarius akahatsu	Lacaka1|MSTRG.4571	3680	152	MLPLLTSASLKNFEGQYAYQGSPNVGYAPPRNAQHYLAAPPLEYHIPPAHVRAHTPLSCPRSICVASDRVRTQGIPNGSQVPPAAMPDVADPFSQNVPNPDPSRTSAREDLKRLANRYLHNPDARVDTLRMGLSPSGGRFMVMILLEVDDII	NA	NA	NA	No differential expression	Not secreted	NA	NA	NA	NA
Lactarius akahatsu	Lacaka1|MSTRG.5149	4287	152	MPTSLLSLPVDVLLSIRDVISSAPFTSADPGLGLLAHLSLSQTCRRLRGIYVLSTPESEDLFWKRACIMAGYGRPMRREYPQSLPGFTPPDTPPPEVLSWKQIALLVTAHKRICEIRSCRNASCWPGEFRLHSIPGSFPGRVWHDMLASLCV	KZV59146.1	7.7e-25	hypothetical protein PENSPDRAFT_645015 [Peniophora sp. CONT]	No differential expression	Not secreted	NA	NA	NA	NA
Lactarius akahatsu	Lacaka1|MSTRG.6893	7658	152	MQLRLTKALVGMDEGLSALPEDVQNKIRRILKDTPGIPSARATLRNLLTSISEAEQARSRARTPGLLREYCELEGGKSSMQFSPVKPEEGSTRLLALRWTAASALPNVEDAKRARRSGSFYKPTNNKGIELQKTTTKISEGNGEVNLKLVLA	NA	NA	NA	No differential expression	Not secreted	NA	NA	NA	NA
Lactarius akahatsu	Lacaka1|MSTRG.7037	5087	152	MQSRGRGGGRGGPGGRGGGGRGGFGRGGARGGSKVIIEPHKHEGIFIAKGKESMLVTKNLVPGESVYGEKRISIETGEDGGKIEYRVWNPFRSKLAAGVLGGMDKIFIVPGAKVLYLGAASGTSVSHVADIVGPVRLLRLTYAFRSHLFFRL	KIK79888.1	1.3e-45	hypothetical protein PAXRUDRAFT_160073, partial [Paxillus rubicundulus Ve08.2h10]	No differential expression	Not secreted	NA	NA	PF01269.18	Fibrillarin
Lactarius akahatsu	Lacaka1|MSTRG.7132	3144	152	MLPHGLLRGVSAALTLNGCRAILWRLLLGPIPAAMVVVMLGAARPVPLGWALRGRGRCIVRIALAVAGATQAEQRERAAAPARSFMCPLTVVRTDSARLLHLATATLAFPFVSDEGPSPHAEPAMDGRCFATTPVAIIFLYIRTNEFLIIIF	NA	NA	NA	No differential expression	Not secreted	NA	NA	NA	NA
Lactarius akahatsu	Lacaka1|MSTRG.1259	1182	153	MSTPQPNASTPPTVHTPPVISVPTIPLGAVQTMMSSLPLPVASQGAPSPHSAPASHPEVSPGVHVPASMPTPATQIAANHTAYAPASVSSYGGHAPAPPLARYSSPTLPERSHHPSPPRSDPPPGVGCFGRAITHYTGNETVRHNRDERAYVL	NA	NA	NA	No differential expression	Not secreted	NA	NA	NA	NA
Lactarius akahatsu	Lacaka1|MSTRG.6449	3205	153	MHRDPFTLRVALDESLTAHGELYLDDGVTYAHKEGHLAWRGFSVNNAGAQLRLSNVDLAAATPRSAVEGGAIATFDRQNAFQRGIESVRVERVVVLGLPDRPKRVAVESGHDLEWEYAPGVAAGAKKDGVASVLTIKNPRLGVASDWAIQITL	KJA28803.1	5e-40	glycoside hydrolase family 31 protein [Hypholoma sublateritium FD-334 SS-4]	No differential expression	Not secreted	NA	NA	PF17137.5	DUF5110
Lactarius akahatsu	Lacaka1|MSTRG.8257	966	153	PWRASRYTPSLRPTRRPLPRSGSGAAARPRLRPPHLPAASPAAPCALLVAISLPHWGGYGGVGIRSRTRYGLGQALEHPDRTADDARPPVAQLRGYGDGLHLEKGRERDDRQRLVVHAWEPAIRIYGYEPAVKEHARSTGRCAAIRASAAPGL	NA	NA	NA	No differential expression	Not secreted	NA	NA	NA	NA
Lactarius akahatsu	Lacaka1|MSTRG.4037	4566	154	MHFHADHPSSDWVASTIIRCEGIDWQVSHMAQVLSHFSATLSTVVHLKVEVKLGNSRQLKDTDDVEWLHLLRQFPAIQTLYLSQELAGHVALALEATTEEMVAKTSPSLDLICLAGQPASSIEKFIAARLSDYPVTVVDTETEFDEKLKSYVSK	NA	NA	NA	No differential expression	Not secreted	NA	NA	NA	NA
Lactarius akahatsu	Lacaka1|MSTRG.8339	4917	154	MPATSTATSAPTASPAGTSNVSSAIPVQLPVSSLPTLHALGIVPVPTQSVSADAPTPPAVLRGTSANGAMLNLEINVSLLQAAQMSGLALMLNSIMLGSSNSGTTEVPPHAQVGAPYTYPYAAAQPLAPATIATTSVNAGHNKANQPQEQEKLE	XP_009547451.1	1.4e-21	hypothetical protein HETIRDRAFT_445251 [Heterobasidion irregulare TC 32-1]	No differential expression	Not secreted	NA	NA	NA	NA
Lactarius akahatsu	Lacaka1|MSTRG.10636	3875	155	MRVLVMVAGSAMKKIKAAICRSNTRRPSRKSGAMRFKFPPSQRDLPVIPKYPPASSTSTMSQVLSTATSSTDFGTIFGAALEAYKKQTKKDIAFHPLAVQLQSCDSPNAILSVLQAQVQAFDQSQIADEKLTKWLDPTVNVLYAFSATLGEGVGL	OCH87563.1	1.9e-07	hypothetical protein OBBRIDRAFT_151110 [Obba rivulosa]	No differential expression	Not secreted	NA	NA	NA	NA
Lactarius akahatsu	Lacaka1|MSTRG.6686	10136	155	MTPLADDSDKPPPLRSVLTKPVVITVANYGTTALLNAVAMSYIPLVWSTPVEYGGLDLSPASIGLGLAVYGGIGGFFQFVFFSRFVSRFGLRRVFVFSIASCAMIYTLFPFENLVMARGGPNPVVWLLIILQMSSLCVFDMGYSKFSPSYTFAQM	XP_007393775.1	1.3e-22	uncharacterized protein PHACADRAFT_89967 [Phanerochaete carnosa HHB-10118-sp]	No differential expression	Not secreted	NA	NA	PF07690.17	MFS_1
Lactarius akahatsu	Lacaka1|MSTRG.8336	3058	155	MAQNTFSSIVPSPLENLETRLSKLGSGTKLAKLHTKFWSTNLPDEPISAGGDGDEDMGQEEDESEGEGEDGDGSEDGGEDGDEDEDENEDEDDDETDCYTLDLSTTCIGVKLWVRKEYIKIYDVCDEYLKSATTSDGPLSVVITGQPGIGGHLTL	NA	NA	NA	No differential expression	Not secreted	NA	NA	NA	NA
Lactarius akahatsu	Lacaka1|MSTRG.8980	3748	155	MVSSSMIKTPLTGVDRSTCFTLNFPELAAQAQLSCNINVPSQSISATLRFRNGNILIPEPLYRPKSFTVQYFDRPSSGKVQREETTHFEVLGGGWHFQADEVARCVRDGKPESSVWGHDKTLLEMEIFDEVNVRVRYDITPAFLTVPTGPPPGWV	XP_009549379.1	2.1e-46	hypothetical protein HETIRDRAFT_478485 [Heterobasidion irregulare TC 32-1]	No differential expression	Not secreted	NA	NA	NA	NA
Lactarius akahatsu	Lacaka1|MSTRG.4467	942	156	NHYATNTVSQCVAQKHNFKFWHSVQWYKDTIAINYSGLPELDFRDFVVQNENITGQLDSSRLIPWLDDTFDAELLRDNRGSLLPDDERGPIRVRANIARWDGQVGNFEPAHAVHVQPRIDDAALLSRLHRARAELMRKGKGKVHIKRTPSTTSLTN	NA	NA	NA	No differential expression	Not secreted	NA	NA	NA	NA
Lactarius akahatsu	Lacaka1|MSTRG.6914	6694	156	MPKLRLSQIASGIMYNSWEAHYRQVTVLRFTPDGEALLSGSEDSGISVWSVFRFVGICITSQSSTHLNQRSSRLVSDRLLDDGVQNENPQVYAHLSDHTLPITDIACGFGPFPSCRVLSASTDHSVKARPTLFGRHPYLTAIDFPNRYGTSPQSRS	XP_007304362.1	2.1e-33	WD40 repeat-like protein [Stereum hirsutum FP-91666 SS1]	No differential expression	Not secreted	NA	NA	PF00400.33	WD40
Lactarius akahatsu	Lacaka1|MSTRG.8459	3170	156	MTLKTKKDSLHDGDGPQRRTQRVPLPHNSLFVMGLQTNARWMHSVHTDKRPEGTKDPAERGARISLTFRRIGTFLTPAQRIYGQGATEKTRAEARPVVHGGAEAERLLAAFGAENHQSEFDWDEVYGEGFDVLHFAAHAAPGEPAEDGGEVVSAQT	OSC99632.1	2.4e-45	hypothetical protein PYCCODRAFT_1372773 [Trametes coccinea BRFM310]	No differential expression	Not secreted	NA	NA	PF13532.7	2OG-FeII_Oxy_2
Lactarius akahatsu	Lacaka1|MSTRG.3123	1455	157	MMFFRVPAVLLFLAFGATAAPVVVPQQVAVVQQGKREVWSPPVINPHKGTIWHIGSTVTVSWYVCLFCFLLLHAKRHCGMEKLTFLAFTCRNTTTRPAQVTNPTGTLLLGYLQPDGEGGENLDVGQSRRVFFCRLMILRHHVGLFQIIPLRRASLWT	KIY45186.1	7.5e-07	hypothetical protein FISHEDRAFT_5943, partial [Fistulina hepatica ATCC 64428]	No differential expression	Not secreted	NA	NA	NA	NA
Lactarius akahatsu	Lacaka1|MSTRG.3674	5179	157	MLLYQFLRELHPCDLNDRREVGHAHRGLGPGLEDSLDNPATSVTEAEEVPPGHPARRRRVWGTCGARRWDLGTAIGIRLGDGNGCRLWRCCPEMDLVSVSGRQRNSTKRARGIMYHECSGQLWVPSDWPLAMAIRTVAPQRQGVFGGAFDRLLRLEE	NA	NA	NA	No differential expression	Not secreted	NA	NA	NA	NA
Lactarius akahatsu	Lacaka1|MSTRG.3705	1260	157	MFTHTHTIFCCQIYVVRKAPYIVPQESLFKPLQDSNEWEPGSSMQIKRCKAQALGPKLGVFGGLLAISVISSCTLAIDLHTFLLFLLARHLLRPHSPLPLVANINRSPAPRRQAAHPTETGYQETKARLSPYRLRRIAYRLSLSKCQDVSSPTLAAP	NA	NA	NA	No differential expression	Not secreted	NA	NA	NA	NA
Lactarius akahatsu	Lacaka1|MSTRG.4355	2222	157	MGRSRTIRPGTTSAVQIEFIPEFEGQFEATIQLIFSQSQQLGHFAVSRRLRAIAGSIDDHVRLESFNQEGHIPRSGSGQQIPPEKVIHLPGTARSSRNIQYKLPPLVQKAVDDATFKHPFNKQAPDLIAALKPTELTTYTYAKYFTALLNVEEGHQQ	NA	NA	NA	No differential expression	Not secreted	NA	NA	NA	NA
Lactarius akahatsu	Lacaka1|MSTRG.9004	1372	157	MRTAIHQDTGRYVSIDDIWEKLRSCYNVDALESLVRLFVFYPTTRRLTPPVSQDAEGFESPGSAHSTPSVVDSPSPSDNLSLHPYFRKEFALPYDEALDTIISNRRMRDSASSTSLSPSPPPPPVKGRRGRRRGRGGGGGGSSARPPATYTRATAAR	XP_009546323.1	7.2e-26	hypothetical protein HETIRDRAFT_318963 [Heterobasidion irregulare TC 32-1]	No differential expression	Not secreted	NA	NA	NA	NA
Lactarius akahatsu	Lacaka1|MSTRG.11991	1720	158	MAPTSPTTTPMADTKRDVRNPILFECAWEVANKVGGIYTVIKSKVPVTVSEFGDRYTLIGPLSYKSAPMEVEAEEPSDPHIAGTLESMRVKGVKCLYGRWLIDGNPHVLLFDTGSQYHRIDEWKGDLWNLAGIPTPPSDHETNESIVFGYVVAWFLGE	XP_009551199.1	4.2e-74	glycosyltransferase family 3 protein [Heterobasidion irregulare TC 32-1]	No differential expression	Not secreted	NA	NA	PF05693.14	Glycogen_syn
Lactarius akahatsu	Lacaka1|MSTRG.6932	2769	158	MTNIITEIMVEVLTIFGIATKELRRGSASELPVVCLSILIEARVEKFLKKLAGRADLEDAIKKLDRLTQEEARMALAEVLKITHIVRDDVKVVDGKMEGIDGKVEDMGGKVDDVGNKVDDVGDKVDDIGDKVDDVDGKVEDISDRVQSVDEKVQVAID	NA	NA	NA	No differential expression	Not secreted	NA	NA	PF05531.13,PF06009.13	NPV_P10,Laminin_II
Lactarius akahatsu	Lacaka1|MSTRG.9469	5382	158	MSARPPHTINPSAKLTAADNTPEPEPSSYRRPVASVRSATLSATPPDPAAPEPGPSKLAARTPPKRSRTFHDTVNASPSAQTPNDDHDGTPNSKKAKTNGLHPDPDISGMHSSDVETMGIDGESLNKTDPTADIKTFFRALPQVPGQAKKRMSCILCA	NA	NA	NA	No differential expression	Not secreted	NA	NA	NA	NA
Lactarius akahatsu	Lacaka1|MSTRG.5761	553	159	LFGALAENPATRFSNAVSFGAAHRSPSTTEMCSMPPTPVSSESLTSDLSLNQGTPPPPFPQSTESLHTLTQKYITMLEENVQTDMENVVVGADNEIDSTEKRTIVDCFDFSSDTWTAFFQRSATGSLEDEMELYDLLDLDAEGDLDYDLDDCVESVFTS	KJA13706.1	1.5e-10	hypothetical protein HYPSUDRAFT_151286 [Hypholoma sublateritium FD-334 SS-4]	No differential expression	Not secreted	NA	NA	NA	NA
Lactarius akahatsu	Lacaka1|MSTRG.5831	2991	159	MGSHRSADELIGRYEQVGVPPSSSYEDNTQPVNPTDKRFTDRLIDRDEDESIGANSPTSQHGPPWPGSKRLTDRPIDRDEGEEDGTPAYLLHGRVEALPPPISGPPPQPVHERFTDELIGRDGESVDQDGPSGPGWRRMDKRFTDKLFGRDKAITARDD	NA	NA	NA	No differential expression	Not secreted	NA	NA	NA	NA
Lactarius akahatsu	Lacaka1|MSTRG.2932	2450	160	MRGYMPAISRRTIREPRFKFSYNMLLYMSAHVSPYYGFALTSPHHHGVHLHRSGRYYHGIPFSPPPNHLPRLQKKKGTPLSTWSKTMANNREFTRLSETIAVDRVHRNVQEIRFVRRHCEMRVHPSLKLALTLTRRHPVPSSFWTVCRGALFSVRGQRPL	NA	NA	NA	No differential expression	Not secreted	NA	NA	NA	NA
Lactarius akahatsu	Lacaka1|MSTRG.2382	3653	161	MVAQATLYPEDLVEDLLEEVLDLEHMVSLDPSTMGLGPSGIKQNLARTKQYLAEMEQNLAKMKQDLAALELDLHNIKLMTRALCSHHGITFPHHLDPSLDHGDHNPKTKIEDYFSEISRTLRDVNVLLRAVCDHQGITIPLRSDFNRHRRIHLHPPWPLRQ	NA	NA	NA	No differential expression	Not secreted	NA	NA	NA	NA
Lactarius akahatsu	Lacaka1|MSTRG.5786	1541	161	MSRRGDCSWCVQILTLSSHLQQPIMCPPINRMTDKFSRNKKACNQTPACRRATAFSVSELGRPFDTSSKLDGGDHLTLLHMARSRVSRRQTRLPLRWPYSADDGSEHRRRCAPPQCRDAVLPIPKRDWDDVGNSGHERTGPHKVLLQACVSTRRVMHRLLY	NA	NA	NA	No differential expression	Not secreted	NA	NA	NA	NA
Lactarius akahatsu	Lacaka1|MSTRG.6549	1013	161	MATPSSDHHRDTVIAWLDRLQSSVRSPPVRSGPAKNPFQLDTHAGESEESDDEQTQQQQQQHVPPRRGSSGSDDSPVSPNTLVEADIDAYADDAVPIGLLANLAISTSKDRPAASAEKKGRDNADDDDDDVVRSHFCCLHGRFLREWRIRLTRLLLTGCRQ	KZV66992.1	8.7e-11	hypothetical protein PENSPDRAFT_66932 [Peniophora sp. CONT]	No differential expression	Not secreted	NA	NA	NA	NA
Lactarius akahatsu	Lacaka1|MSTRG.11513	3231	162	MRVLVMVAGSAMKKIKAAICRSNTRRPSRKSGAMRFKFPPSQRDLPVIPKYPPASSTSTMSQVLSTATSSTDFGTIFGAALEAYKKQTKKDIAFHPLAVQLQSCDSPNAILSVLQAQVQAFDQSQIADEKLTKWLDPTVNVLYAFSATLGEGVGLVNAEILA	OCH87563.1	2e-07	hypothetical protein OBBRIDRAFT_151110 [Obba rivulosa]	No differential expression	Not secreted	NA	NA	NA	NA
Lactarius akahatsu	Lacaka1|MSTRG.329	2229	162	MLTRAESRRQVSSVSFSSYVYPILILVLQAVDEFVGELKLREADTEKQRKLAALALDEEEWTRVRLLCNILQVHTVAVNHSIPLTPRPQHADDALHTFSTGSRPTLHSVLPALEKLIAEWQKASGKPRYETFVPALTAGVEELDEYYKRSGPSDAHLVVMGE	PPQ81719.1	7.4e-26	hypothetical protein CVT26_007781 [Gymnopilus dilepis]	No differential expression	Not secreted	NA	NA	NA	NA
Lactarius akahatsu	Lacaka1|MSTRG.5182	7428	162	MYLALSSPFNKRSIFNVQRLTFNVHRQRYDVSHLLSYNYVKSKPFPYRFPPLFISLPFGGFCSCLLPFSASISSSSSFLPNAIDYGAVNKNVPDSCYWVASMTFIRYVLLASMKDDTEPPFGQCQLGRNLFEQFNTWCLPSLFRCSRGSLLCIALKSSPVPS	NA	NA	NA	No differential expression	Not secreted	NA	NA	NA	NA
Lactarius akahatsu	Lacaka1|MSTRG.8682	5655	162	MSKRIRIFTASDVLQHDSVSSCWITYRGKVLDVTNFLADHPGGEEFILKHAGRDVEDAMGDVTEHEHSESAYDMLDEFVIGRLGAGENIVNDGWVATDDFTPEDTDRAADYEKNQFLDLRKPLLRQMWDCNFRHVFFCVVLRTNALTFALQQSVLSPTSSPT	XP_009552192.1	4.3e-50	fatty acid-2 hydroxylase 1 [Heterobasidion irregulare TC 32-1]	No differential expression	Not secreted	NA	NA	PF00173.29	Cyt-b5
Lactarius akahatsu	Lacaka1|MSTRG.9569	1965	162	MIQSTRKPGPLFLVFHDNHEDLKYLRSPEIEAPLEDLSFFLPESCAEAEASDTKKYTSSTSELFAALEGDSGGQKRSLERVCRLLQIKSEFTQHLHNAGNDARVGLFFFTTLTLPSSSLLTDVVVHAFGSQGNGQWGPAGHATDGTMAAAHKHQRWPSRQVF	XP_009543710.1	1.4e-21	hypothetical protein HETIRDRAFT_312712 [Heterobasidion irregulare TC 32-1]	No differential expression	Not secreted	NA	NA	NA	NA
Lactarius akahatsu	Lacaka1|MSTRG.1291	2585	163	MLDQPELATRRRPRCSPRPLFLPRLVLTRSHLPSHPPFSITPAPFSMPISSDFKCLPSATEDQSEPEPTPTLFASVPTPPSAPPHVHSATDNDPIFASTSPSLSPTSSTFLLSPTQPAIDDQPEHVSLSAPTHPSLPSAPYLHAYPLKIDSKSCQIQSVRPPQ	NA	NA	NA	No differential expression	Not secreted	NA	NA	NA	NA
Lactarius akahatsu	Lacaka1|MSTRG.3109	4079	163	MRIRVQHYLAFAARLRANVLAPDYRGFADSTGTPSEAGVVLDARAAWDWLRVRGAAPASVLIVGSSLGTGVAVQFASALEEEADAGDRKTKSGVAGWVHPAPLAVRERPRGVVLLSPFSKLETLLDTYYILGLVPLFAPLRTIPYLASERLLSQIAVTRAKKN	KZT19963.1	1.7e-30	alpha/beta-hydrolase [Neolentinus lepideus HHB14362 ss-1]	No differential expression	Not secreted	NA	NA	PF12697.8	Abhydrolase_6
Lactarius akahatsu	Lacaka1|MSTRG.6688	1827	163	MSSNELDKPLPLRSVLTKPVVVTTANYALFAMLSAVAAVYIPLVWSTPVEYGGLNLDPASIGLGLSVYGGMGGFFQFVFFSHFVSRCGLRRVFILSIASCAVIYTLFPFENVVVACGGPNFIVWLLIILQMSSLCVFNMGYGKFLPRAHYLTRRYSWRVWGYS	RDX57347.1	2.7e-20	MFS general substrate transporter [Polyporus brumalis]	No differential expression	Not secreted	NA	NA	NA	NA
Lactarius akahatsu	Lacaka1|MSTRG.7274	2137	163	MPVLLRTVTRKFSSSVRTAKSLPLSLVSARERGIPIDVHPEVEQALLENKPLVALETALVTHGLPYPINLETAASVERHVRSAGAIPATIGVIEGRVKIGLDSTQLAHLADVHNNCGSVKLSRRDIAAAVALKKDGGTTCSATLIFAALAGIKVSTNIHQYSD	XP_009540849.1	4.5e-47	hypothetical protein HETIRDRAFT_377513 [Heterobasidion irregulare TC 32-1]	No differential expression	Not secreted	NA	NA	PF04227.13	Indigoidine_A
Lactarius akahatsu	Lacaka1|MSTRG.8781	3262	163	MTSSSTCSMTKKGAESSRTSRVKGMYANPKRVEEYIALQNYLFLLLVELFPLGTEQFADFACTISSAHVIGLFKKRDIPKLASGFSALILSRQSWLKNMYAESARLGAFGSFLRAPPLGVFSDFSVALRVCEQLGINIDERLQKGEMYPTDLRLGCFLGHLWG	NA	NA	NA	No differential expression	Not secreted	NA	NA	NA	NA
Lactarius akahatsu	Lacaka1|MSTRG.1037	3704	164	MLSRAQSNALAVKKDGHDDAGTISGVGASQHYFEKSTCTGPPCRIYGRICAVLQKFQLSGISFPALPTLLMSASNLVLLFLQKIPPTGDISPEAMVGCLAALHRLKTFVIKFQSATPHPHRIHSLPTTRTLLPALIQFVFAGASEYLEDLVVQINSPQLDQGRH	NA	NA	NA	No differential expression	Not secreted	NA	NA	NA	NA
Lactarius akahatsu	Lacaka1|MSTRG.11488	2166	164	MLREAAAFDTSVFGEPPLPSSIKETNMEPRLHTLSTPKFLRGYDTDTFMGTHDEKRREVNVREGYVEPLGDDITKKIAAGEISELVVVAEGEERTTWFVWSLVFCSSISGLLFGQSYLFLFSTTMSYSVTQGMTPASYLVLSSALAQTLVLRAFPISRRFKPAI	XP_009550512.1	1.1e-11	MFS sugar transporter [Heterobasidion irregulare TC 32-1]	No differential expression	Not secreted	NA	NA	NA	NA
Lactarius akahatsu	Lacaka1|MSTRG.1357	2452	164	MHYYHCISVLSVLATSLLGGFAKRLSPPWDDMHIKHSWNAVPKNWVAMGPPPPGTTIDLYVAVKPQRENALVDTLIVHCVQSRVFQPIKPLENPKKTLDKWLCLTHHRVFYGFYWSENPALHAVVLALPPTCHMTSRDHQSKNSEPQINFDSKIMLLITNINMT	NA	NA	NA	No differential expression	Not secreted	NA	NA	NA	NA
Lactarius akahatsu	Lacaka1|MSTRG.2960	5070	164	MISKLGEIMDEFPGAANQMRCFAHTINISAKAVLRQFDIPKKRDGEELDEVGRALADLAEGLDLEEHMEQETQEMANGNEDDKPLEAWDDFHGGLTREEVRQLDVSVQPMRSMLVKVRWLILTLTLLQLTCPSCASSRLPSRTRLPNSFRPGTILSPPSDYLIE	PPQ81292.1	9.8e-26	hypothetical protein CVT26_015194 [Gymnopilus dilepis]	No differential expression	Not secreted	NA	NA	NA	NA
Lactarius akahatsu	Lacaka1|MSTRG.3110	4316	164	MASMDARPSLSDWLCALDEMSQLTTLGLHSASPIAPPGALLPSGVERTVTLTSLARLNISASVRDCGLALAHLLLPALTQLCFSSSSCSRDGSDVQEILPYVARHAHGPQDTQPLQSVLVSNDKTYTSMRVWTEPNIDVVSHNPINFSKVMPSARVTFSVANKD	NA	NA	NA	No differential expression	Not secreted	NA	NA	NA	NA
Lactarius akahatsu	Lacaka1|MSTRG.5596	3109	164	MHDPAAERPPPQTHAARLLRTQQECDPADRDDGPCVPRAQKAETATTIAATAAAAQLAEEAQSREEERKAEYERRRKERKENGMGRRGASGEDNRERRPLKLIGARCVYCCCCFFKFTSIKSVLQAVLVDTGAIYKKLVRFGSVLVDTGAIISIIIASELTLQI	NA	NA	NA	No differential expression	Not secreted	NA	NA	NA	NA
Lactarius akahatsu	Lacaka1|MSTRG.6895	2760	164	MSTLILTMPPSVVRPLSYEHRTLRAHDAFKASGPSFTLKETSWLRGQSIMRGTLSSSRGTFDVVAKLGTSTNTIDALKKELSFYQKLRHLQGECIPKCFGYFFSPSEDQTFGCLVLGYSGKPVRSIYDTQGDVPLALRCDLFACDPLVVSLMASSLQGEHHQCS	XP_007307968.1	5.4e-08	hypothetical protein STEHIDRAFT_160389 [Stereum hirsutum FP-91666 SS1]	No differential expression	Not secreted	NA	NA	NA	NA
Lactarius akahatsu	Lacaka1|MSTRG.9347	2012	164	MCCPADGGGVVPSTTNAADGACGRGRLRRKKNKRPTTAATATTPPATPPAMAPVFDLLPEDEVGEEDGEEEVEEEEVDPDREAVEVVEISFPEAEAEAAVPVLINEPGCISGVSEENWSDGNKVRKVQLRTTDYERRGGIPEVLILQKMGVHLFSWVSGWCGQG	NA	NA	NA	Repressed during mycorrhization	Not secreted	NA	NA	NA	NA
Lactarius akahatsu	Lacaka1|MSTRG.10570	4422	165	MVADHIQLSSPDVFLSHDWPSGVEQHGNVDDLLRRKPFFRSDIESNQLGSPPLMSLLRNLKPSWWFAAHLHTRFEARVQHDPPGPPVVAASNPDEIAIGDEDDDFEVPKDTTTPQNQDEIVLDNDTETVALPPPPPRETKFLALDKCLPRRQFLEVDYSSFTGCR	XP_007264289.1	7.5e-42	DBR1-domain-containing protein, partial [Fomitiporia mediterranea MF3/22]	No differential expression	Not secreted	NA	I01	PF05011.14	DBR1
Lactarius akahatsu	Lacaka1|MSTRG.3198	6896	165	MPEHSRVAPALSKNMGECGRGRQRATHQSTPHLLLDQLAAGSPGRVARIEREQHNVGLVGDHSQRANVVSFRLAVPNRGLLRHSGREVAHGNGRCKPRKRRKRQLRHLRAVGRTASTGRNGRVAGRRVSWTGMGVQRIGATDFVTRHVRRAWMLLSTGSARAGRG	NA	NA	NA	No differential expression	Not secreted	NA	NA	NA	NA
Lactarius akahatsu	Lacaka1|MSTRG.6655	13700	165	MPEHSRVAPALSKNMGECGRGRQRATHQSTPHLLLDQLAAGSPGRVARIEREQHNVGLVGDHSQRANVVSFRLAVPDRGLLRHSGREVAHGNGRCKPRKRRKRQLRRLRAVGRTASTGRNGRVAGRRVSWTGMGVQRIGATDFVTRHVRRAWMLLSTGSARAGRG	NA	NA	NA	No differential expression	Not secreted	NA	NA	NA	NA
Lactarius akahatsu	Lacaka1|MSTRG.7453	3085	165	MSKVSILDRSPSAETFVAGMELGTAVDGISGDMPASAVDPATITSQQVVDDKTGTQYSLRLIENLRELDVSEAFSANAAITFAGGDVEAGVNTAFDFSHSRTSTGHSILIALRCEKRGPSMRIGNGAKLTEAAKSLIKDPREFREQYGDYYVHGISREARFIAVW	PVF91491.1	6e-23	hypothetical protein CPB86DRAFT_878495 [Serendipita vermifera 'subsp. bescii']	Induced during mycorrhization	Not secreted	NA	NA	NA	NA
Lactarius akahatsu	Lacaka1|MSTRG.9369	5174	165	MNSFSRELSHELNSLSKGQSLTKSGHVFGPSHIFVPGAPAPAAMPSPSLPTFTTIPPTPTFRDDEYPYGNTFAGQENADACNLMLPDASWIAVVCGVADSREWQTKRHDAGSANTSSGEEDGELPDGFYIAPRDVYMPDLMAVGDVLLGKLVCLPSTRRSPDALY	XP_009545581.1	3e-22	hypothetical protein HETIRDRAFT_383387 [Heterobasidion irregulare TC 32-1]	No differential expression	Not secreted	NA	NA	NA	NA
Lactarius akahatsu	Lacaka1|MSTRG.2201	2939	166	MAYGGRVRVDSNVGNACGVIDSYMMSKRHIGLGSPIPLITLFGLTVRLLHLSSSCSYHHHSVPSALMSTESQPQQGVSSPTRRFTAPPNYSFPHHRLNLLQRHSERQPIVLVACGSFSPVTYLHLRMFEMAVDYARQNTDFEVMGGYVSPVSDQYKKPGLLSAPHR	XP_007310169.1	1.2e-36	Nucleotidylyl transferase [Stereum hirsutum FP-91666 SS1]	No differential expression	Not secreted	NA	NA	PF01467.27	CTP_transf_like
Lactarius akahatsu	Lacaka1|MSTRG.499	4770	166	VCALIMSSPLASIVAFYDYALQPVSALAWVGDPISILDIAAAFRLALILRQVRELFHNEHIAKTSSKNGQNVDLPEQRSRVRDLVTNFIMVFGGEAVVGASKPWSKLSYPFEPCICTVYSTLPRLATVFFPLRELPFPFPGHRCTRRFTAYRSRVVIIYRVAVGDP	XP_007301247.1	1.6e-15	hypothetical protein STEHIDRAFT_108814 [Stereum hirsutum FP-91666 SS1]	No differential expression	Not secreted	NA	NA	NA	NA
Lactarius akahatsu	Lacaka1|MSTRG.8880	540	166	ESITATPPFRPSQFGASYHRAAQAHQQSISRTLDTLRCQQSALQIASTALDLNVLNVADVFDGVTAGARRELDKQANLLASVDADLEMASRVHVHREFMSVAMQRAIDSGGRARTLGDYVSNEKMHQVADACRRTHGISLLHSGVRIFMILVKPTFRNAFVASKRL	KII87895.1	2.7e-39	hypothetical protein PLICRDRAFT_112259 [Plicaturopsis crispa FD-325 SS-3]	No differential expression	Not secreted	NA	NA	NA	NA
Lactarius akahatsu	Lacaka1|MSTRG.3465	1801	168	MVSTSFKLVLNAALAEYTNQVGIDLATYPLADTLRSCDSPDDVLKLLEDNANKFKDFRDGNRKLLNWLSPLVHVVHTLSAVLGASIALVSRNIYYFHVPIHKSCSQVPFEPAKAVFSGVDVLIAVRILLHSPIIPPRHIWVRRQPVASARAMMRSLTCLNASQISSNA	NA	NA	NA	Induced during mycorrhization	Not secreted	NA	NA	PF17109.6	Goodbye
Lactarius akahatsu	Lacaka1|MSTRG.6266	2499	168	MLLLKTPPSQRFMGYYGIVYYQGAWYITRNVNMVQGTSPGIPFCATPLLDYNIGATHGTVIPQRRWSPADEVDVRRHVEGAMLQLPIFFINRDGGIGFGLPDILRGCDRDVHNGNNFAPLGGRTMTHIRINVSLSHGQYIRRNNDLACSTALFVVAWLYVLEAPGCHP	KZV62479.1	1e-09	hypothetical protein PENSPDRAFT_247579 [Peniophora sp. CONT]	No differential expression	Not secreted	NA	NA	NA	NA
Lactarius akahatsu	Lacaka1|MSTRG.1179	1872	169	ELLKRQKTSTADNSSSPPVQAPPPRVPSVVDSFSPTDPLFNPAFDAPPFPFGSEAANLEYSILSAILGNPSPEGNPPSDSHSSSTPPPSTLPFTAPSEYATSWSSGPNGSLLPSEPSNFLTSPFTGVRNAPTMYEDTPLVLPNADRPQTGSSSSPFHRLSQPIIFLPRS	KIM91920.1	2e-13	hypothetical protein PILCRDRAFT_94123 [Piloderma croceum F 1598]	No differential expression	Not secreted	NA	NA	NA	NA
Lactarius akahatsu	Lacaka1|MSTRG.2719	6222	169	MSAPDLCTFPHPIPGGRPSPMRWRIDCARIVLVPGPLRDHLSRRPLGPPFGVSCLYAVSRSSRKHIPRDRELGPYLWLVAQGPSHQVCFPFRCLFVNPGYGLADLAEESTGEDEDVVGNEGTPYNMVDWEDIILGLTPEGSMLGDNPAGTSFGVECEPVPAVGGSVVVP	NA	NA	NA	No differential expression	Not secreted	NA	NA	NA	NA
Lactarius akahatsu	Lacaka1|MSTRG.6550	3676	169	MLYSRFLASLLAKHRRDGAARGRLHQQGPPTQQPHVSSSAPVYQHQRQTTQQAPPSHSANPSSFATGGNPTTVQDVPSHSAPTTPNGKPTATQSANNEPMHQLETPPYMFGATTGQPGQPGDANAMDFTFDISIDELLGPMKAIENPLWMQTMMLPGCVVLSPSLVPLN	KDQ22862.1	6.6e-09	hypothetical protein PLEOSDRAFT_1069066 [Pleurotus ostreatus PC15]	No differential expression	Not secreted	NA	NA	NA	NA
Lactarius akahatsu	Lacaka1|MSTRG.8691	2343	169	GFPVLIKAVHGGGGKGMRTVHSASAFLDALESAQREALKGFGNADVLVEKFIERPRHVEVQVFADTAGSTVSLWERDCSVQRRNQKIIEEAPAPGLSPELRADLGGKAVAAAKAVNYVGAGTVEFIFDKDTDKFYFMEMYGLFSRQFCSGLSTRLVGTPDCRLSIRSRR	XP_009540586.1	3.3e-61	hypothetical protein HETIRDRAFT_305347 [Heterobasidion irregulare TC 32-1]	No differential expression	Not secreted	NA	NA	PF02786.18,PF07478.14,PF02222.23	CPSase_L_D2,Dala_Dala_lig_C,ATP-grasp
Lactarius akahatsu	Lacaka1|MSTRG.8594	5852	170	MHSDVRLRVPHVHLMAGLKPPRGLLLHGPPGTGKTHLARAISASTGSSVLTVNGPELTSAYHGETEASLRRVFAAARAREPCIIILDEVDAICPRRGDDAGGEVEKRTVATLLTEMDGVDGADGVRVVVVATTNRPNAIDPALRRPGRFDREIEIGPFYSLVRGVNDGVC	XP_009546780.1	1.5e-61	AAA ATPase [Heterobasidion irregulare TC 32-1]	No differential expression	Not secreted	NA	N10	PF00004.30,PF07728.15,PF13191.7,PF13401.7	AAA,AAA_5,AAA_16,AAA_22
Lactarius akahatsu	Lacaka1|MSTRG.9008	1869	170	MSLAKDVISLYASPATVPSALRDDPTSVPALPHDILASSSIAKPPSIPSVQSFNARLVAGGKDETLRKASDLFKSAAIAVERGHDVGARYWMDALKIRRRNWGLTPAPLPLGVPTGRGADRTTKDFLISFGLPECLCFCTHSLADAHSHSISIASLSTESNWPTCYIQFQ	KIM90854.1	4.9e-36	hypothetical protein PILCRDRAFT_811341 [Piloderma croceum F 1598]	No differential expression	Not secreted	NA	NA	NA	NA
Lactarius akahatsu	Lacaka1|MSTRG.10717	1094	171	MPLHQVLQRSWEIDLELVRMLVDAGAKVNVKDHEGQTPLHTMFDSGCDHEDIFCAVLQLLMERGADVNAQDNDHKTPLHLASHYLWVEKWLEVVWMLLGHGADPSMENKEGKTPFQLVREAIMRRDETTAIGILCHASTASTERGNDESTLRLLVSGRHQYVLPLSCVNMY	NA	NA	NA	No differential expression	Not secreted	NA	I32	PF13637.7,PF00023.31,PF13857.7,PF12796.8,PF13606.7	Ank_4,Ank,Ank_5,Ank_2,Ank_3
Lactarius akahatsu	Lacaka1|MSTRG.7134	3383	171	MVASLLELPSEVIILIVYHLPLRDIIACKQSCHRVRTLIKDSQLLQRHFQTMSCGVEDLFVPGICSSELLESLEQWEVAWRKVDIGERFARHRYHDILWTVEYVVQSGHVAAMRMGDSDWHAPPGWSYADISRVLIEGDEGPQDSELGWTNIQLGNAIIPKGMCWTSARIW	NA	NA	NA	No differential expression	Not secreted	NA	NA	PF00646.34	F-box
Lactarius akahatsu	Lacaka1|MSTRG.9698	1645	171	MHGHRAARIDPLDLLHREDVGALNAKRYGLIDGSKSYDVNGILWTKRVGEAPETPEHWTLRDITNHLHSVYVGRIAYEYMHSSSKTERLWFSHILEARTPPLLDIRQKKRIHELLVHSETFDQFLQLKFPNLKRYGLEGGESMVPALDALFSVAARGPKPFIFSVRTSSLS	EPT02178.1	6.3e-60	hypothetical protein FOMPIDRAFT_1029469 [Fomitopsis pinicola FP-58527 SS1]	No differential expression	Not secreted	NA	NA	NA	NA
Lactarius akahatsu	Lacaka1|MSTRG.10653	3433	172	GTLPFMSTRLLDEWRLNNLVLHTAIDDLESFLWVLVWSLVCVFKKFANITNQNSRIHDLGRSLSSRSFLEIQSREASAKKWKDKVFRDLIRDWLRISETSRTVVNDLQETLIELVNDGDTGDAQTRIFAELDKHCGMAYKEFIQSGYEHLQTIRAFSNWRDVVDFDGELLNK	KIJ41908.1	4.8e-07	hypothetical protein M422DRAFT_171633 [Sphaerobolus stellatus SS14]	No differential expression	Not secreted	NA	NA	PF17667.2	Pkinase_fungal
Lactarius akahatsu	Lacaka1|MSTRG.2681	970	172	MSMLLDLDNGVLAAPCQNSDFRGDWCTARRMFFSSLSHTMERSNIYGSQATGHVSASNDALCSLFESMEYLLRPLDICTETPPTTATTTILMKILVELLSILALGAQQLEQGLLLVQYDTIDLGNKLFGIKGVEVVRQRLGRLNQEEARATVVQILEVVYGLFKNMKVVMKG	NA	NA	NA	No differential expression	Not secreted	NA	NA	NA	NA
Lactarius akahatsu	Lacaka1|MSTRG.4761	6270	172	MTPPSPSPLEITPVGPISPSRSPTKRTHFTPLAAFALTKTTTWAHANRLASLHPSRKLSICPLDATGPPNVHSSRFTIYPPSKFPPSVHPCYCFSALVLLTSTSRFHSSFPPSSFRISSRPFPPTCTSFGVSMKTSPAVGATPPGHATPSRIGPSAGSICPAPQASSLTPED	NA	NA	NA	No differential expression	Not secreted	NA	NA	NA	NA
Lactarius akahatsu	Lacaka1|MSTRG.6800	4803	172	MWTFDSLDEDHELERFFSGLPGIRSSKVVDDPLPRLTEEAKKKLSETLMGFFDRTFSSDLLPVPVKNHRAIICAKALDPAQFPYAFWDIFRRVISEDQHKGLQTAEFVRAMGGWRSGGDRETALLGEAMFTCLIARAQGRDDSWLISAPNRLGIPEADLRHYATDGDLSLTN	NA	NA	NA	No differential expression	Not secreted	NA	NA	NA	NA
Lactarius akahatsu	Lacaka1|MSTRG.8819	2704	172	MLASHPYKLHLTTTIGFPFPFLMDPPQKRQFINAHTGGQSRPEQHSWFAVHGSGPERYSRPSNTSSLQSYYTSPQQSDISSQSYYSARESPSNSTTNSASTPSSDMSFPYSVTSINSRKSRKNVLYPRREHPPPVAAASEHSSISLDVHFFSSSLFVIPPIEYRCSFSPRRP	NA	NA	NA	No differential expression	Not secreted	NA	NA	NA	NA
Lactarius akahatsu	Lacaka1|MSTRG.2641	5666	173	MVAFPEAQRRAQAELDIVVGRDRFPTFSDSPHLPYIHALVKETLRWRPAAPFGVPHVATREDWYEGMYIPKGTACMANIWQCNHDPAVFGDDADEFRPERFLDERGELDPNQEGHYTYGFGRRNCVGKLLANDSLFLYVARTLWAVNLERVRDESGNEVMPDTDTLVGPGPFM	KDQ22589.1	1.4e-51	hypothetical protein PLEOSDRAFT_1050622 [Pleurotus ostreatus PC15]	No differential expression	Not secreted	NA	NA	PF00067.23	p450
Lactarius akahatsu	Lacaka1|MSTRG.3610	974	173	MVKEVLRWSPTVPFGIPHTSSADDWYEGMFIPKGTLILPNMRVVNFDTAVFGADSARFNPARYLDEKGQVKVVMDGREEGHASFGYGRRVCPGRFVAEGTLGIDFATLLWALRFERPEGAKGELDVNTPVHSGLVACVFLLLRPMVLLNPQATATLCLSSSRQSLGLRRPKLY	KZV64297.1	6e-34	cytochrome P450 [Peniophora sp. CONT]	No differential expression	Not secreted	NA	NA	PF00067.23	p450
Lactarius akahatsu	Lacaka1|MSTRG.4296	8540	173	MAWQAAAAFLACARIGAVHSVVFAGFSAESLRDRINDCKSRVVLTSDEGRRGGKTIATKAIVDSALKQCPHVEHVLVLRRTGNDVAWTQGRDKWWHEETARVPSYCPPVIMSAEDPLFILYVRYPHDLAFQCEPELFPDVRLDWKAQGCRAHDRWIPAWCGLDREIRLRPPPG	XP_007394971.1	1.1e-54	uncharacterized protein PHACADRAFT_254725 [Phanerochaete carnosa HHB-10118-sp]	No differential expression	Not secreted	NA	NA	PF00501.29	AMP-binding
Lactarius akahatsu	Lacaka1|MSTRG.4314	3387	173	MVANQTVAYVPPTGYESEAELVRDRMYNHVTDTRSRRAIRELHHNPSKDRACVSHDPTRRVPTLHLVGYLLFVCCICCAAYNSLCTPLKPGMTVSNGTGSSCLTPKFTERAEPGYYAEEECGIRIENVVNVREAQTPNNFGDKGISSFEHVTVLWFVSPCLLPVYGRRTDMDS	OJT08305.1	9.1e-14	hypothetical protein TRAPUB_844 [Trametes pubescens]	No differential expression	Not secreted	NA	NA	NA	NA
Lactarius akahatsu	Lacaka1|MSTRG.4751	1583	173	QIGTTTFIEPSGDATSPSKWTSPAFFSDLSAFKVTHFSSGKHNLEVVAGVTPDAENTALADDPSTWTNASTMLQVFYPEGSINPARKPQGGSQFYAAPLDLRNARSVTFAYSVFFPSDFDWVKGGKLPGLYGGRTGCSGGDAADDCFSTRLMWRSRGAGELYLVRSQSFFPGL	KZT11137.1	5.8e-45	polysaccharide lyase family 14 protein [Laetiporus sulphureus 93-53]	No differential expression	Not secreted	NA	NA	NA	NA
Lactarius akahatsu	Lacaka1|MSTRG.6705	3288	173	MAQSLQSSVTLGATPPLAVPGPTSPPISSILPLLSSAFTTGLSTISYISGFFRTISYSLFSPLLIIIPVGYYLLSPIIISAQLLFDTFVGMPYRAAVYVLQAVYPIYAFLGVACLSGIIIGLGARQIVSLIGWGLLGGEAPSTQRSGSPPRPRPPRKSSISRGKRRVTVKAED	XP_007308476.1	3.2e-19	hypothetical protein STEHIDRAFT_124496 [Stereum hirsutum FP-91666 SS1]	No differential expression	Not secreted	NA	NA	NA	NA
Lactarius akahatsu	Lacaka1|MSTRG.8097	11662	173	MNYDVWGSWSNSVGPNAPLDDSCAPSSDQDGSAISAVKAWSSAGFPANQIILGVASYGHSFHVSNDSAVDASGNIELYAPFDKSQQPAGDKWDGTADGVDECGNPNVVGGIFDFWGLIDGGFLTTNGTAASGMDYTFDNCSQTVCALQRLQQLLIEQLMPLQLSLLCTIPHRR	XP_009551845.1	8.4e-52	glycoside hydrolase family 18 protein [Heterobasidion irregulare TC 32-1]	No differential expression	Not secreted	NA	NA	PF00704.29	Glyco_hydro_18
Lactarius akahatsu	Lacaka1|MSTRG.7277	524	174	ENKVAVDSRFSSHSRNSQSSVRTIYIFVRSLLKRPNTGRTRGQIGRRLSDVQDNESLRRFYRIDPEIPVDLSAGPDYARGEVLLESSDEEDGSSKDARPSDEENEDIVVLGRDTDRLSPVSDEEDAEVNLDEDDTVDSIPQATPYYPKIASEDEQESLRRTRRIAVVDLDWDHV	KDQ63530.1	1.1e-22	hypothetical protein JAAARDRAFT_381668 [Jaapia argillacea MUCL 33604]	No differential expression	Not secreted	NA	NA	NA	NA
Lactarius akahatsu	Lacaka1|MSTRG.8582	4270	174	MGPGSSPPVADFDALICFSNPDSGPFKLSSNSSTTVTSSTHTTSKTSSLPHSSPPPNLNGDVHEPTTEFSTSSPSHLHPQHLRQPLRIANHLPPLLRPHPLPLRPPRAVLAPFRLTTSPPTSRLITPSVPNMGPTLSPGATNCLPKRNNGPTDATLCTLAALSGDLAVSACPQK	NA	NA	NA	No differential expression	Not secreted	NA	NA	NA	NA
Lactarius akahatsu	Lacaka1|MSTRG.8770	2914	174	MRKPPRKKDEPIISRRILSRVAFSASIIVVGTLFVYYFALSDDQRMSRRDQTMVRVVCSRLYPPCSLTQLPRQTFSCFVFLDLISAIQNRGLGCGLTQNRMLVVTVAISFLSQLGLIYIPFMQAIFQTSALPLDDLLLLFALAATSFMVHEGRRRYERALNQSETYAAATEELA	XP_009553045.1	2.1e-50	P-type ATPase [Heterobasidion irregulare TC 32-1]	No differential expression	Not secreted	NA	NA	PF00689.22	Cation_ATPase_C
Lactarius akahatsu	Lacaka1|MSTRG.9710	5148	174	MLIILAPSPSPIEGAKKEGRTLIHMASFYPLACGPGPNRRLFPHHRWKTGANFFRAAPWRIRSIPTVVKLQGVRVFIHLGTSGMLTPPPPTASPGPRWVHDFGCWSQAKEAGRLVEGQIASDLPTFVGSAATTSPTKDEPPAKDEPPIKDETPIKNEPPTKDKSPKDEAPPKDS	NA	NA	NA	No differential expression	Not secreted	NA	NA	NA	NA
Lactarius akahatsu	Lacaka1|MSTRG.2944	4741	175	FTLLHLHSIRQDGRAVYGHQREAQGIPFPFFGEDKSADTSFQVYKSHLIPKFHVKSPTLRTKRLATQATSSDSSFNFAHDHHIFPSKRQHLDVAACYLTIAYTGCWPAEVADGGQNILLDDVCWKSSLAPELPSRWGHLLKTCLQMRSPSRSQSCWNSRRSTVAGPRPSATRISS	NA	NA	NA	No differential expression	Not secreted	NA	NA	NA	NA
Lactarius akahatsu	Lacaka1|MSTRG.4859	2958	175	MQIIFSLDFVYAYGTGCIRSGITLTVLTMYDDSGMRRFFQSSRNPLRATLVIGVQMFSTAVFTVWLLCVWAQNSHFGSQPDCNHLVKFVFFFASVHATAAWLRTLFIVGIVFAACSLLFKFCTIVFVKPEHFEQHLSHVRDAKPNGAGGKSVYKSCCKYFTAGCVSPTKSVSSCF	NA	NA	NA	No differential expression	Not secreted	NA	NA	NA	NA
Lactarius akahatsu	Lacaka1|MSTRG.5304	4231	175	MSQSTPFLQFILSLLLLLLCTNYALCDPLVNFQVAQPPPFILDSESLQCTTTIIQSVSLTRSSQCVRTHIDWLSGAHLDPPLESMRLALGTFTVYMYADAREFQSRDRQVHVRDLLVYLPVVPVDASISDHQPVAVPPTCGLVSPLTLPSQATERSSPVSHFLPSRMSKVCLFLM	NA	NA	NA	No differential expression	Not secreted	NA	NA	NA	NA
Lactarius akahatsu	Lacaka1|MSTRG.10405	9918	176	MSSLPSLFHSPSSRVAPSSGSANNTCICESNPFLVAFSACINESCSSDDIQQALTFYSIACAGEGPGKHSLVDICALSASEYPSSPLGFSIPATESSTTVSGSSSSGIPTLSSSVSTTSTTSSSKPTSSKTTTGTSTTSTPSSSSSPTNAAASLSGHAHAAVLMAGGIGALVAVAM	NA	NA	NA	No differential expression	Not secreted	NA	NA	NA	NA
Lactarius akahatsu	Lacaka1|MSTRG.4789	4838	176	MAVGTGFVQLFRGLGAYQLFSRIRPSNCSAGQVSGVGVASALFQHTLSAELRKRIHGPGADQVRRASVLLRGSGCADTAIQLINRIRHSATLIASLPLETQRAARDSYAIALRAVFIMAAFSTAVAFIVRLPVSLSIFLLCSDAYRARCFRSPRNPSIISRPKSRCPLQRSHGGRR	KIK93560.1	8.3e-23	hypothetical protein PAXRUDRAFT_144798 [Paxillus rubicundulus Ve08.2h10]	No differential expression	Not secreted	NA	NA	NA	NA
Lactarius akahatsu	Lacaka1|MSTRG.4885	530	176	QWLLVMSTQLIGFSIGGICKRFLVDPPSMIWPSSLVITALFNTMHSLETTGTYGLSGISRVRFFTYVFIGYFCYSQCVSRFFGLPSGLTFPLDFVPSYLFTGLSSFSWVCWIAPNNAKVNQLFGVTHGLAMGVLTFDWGQITAFSGSPLPTPWWAAAHTGIAIISFAWILAPILYV	XP_009551263.1	2.8e-55	oligopeptide transporter [Heterobasidion irregulare TC 32-1]	No differential expression	Not secreted	NA	NA	PF03169.16	OPT
Lactarius akahatsu	Lacaka1|MSTRG.5302	4015	176	MLPPRACESYLSHFFVRLIQFTCLLDVFLGLNGVRVLSIIACLLVFSSSIVTMVHDVEAVNDFVAAGKSNSTNADSLLVCDYIAYVFILISSHTHELILCLVIAPCPINLLAPFGPSSTDSSSYSKSSCSFSPKSGGPCRFSTDFSPCLVLILVSVPLVSCSACTSVSASFPPFSR	KII90114.1	1.7e-12	hypothetical protein PLICRDRAFT_40314 [Plicaturopsis crispa FD-325 SS-3]	No differential expression	Not secreted	NA	NA	NA	NA
Lactarius akahatsu	Lacaka1|MSTRG.8982	2769	176	MATSPLVVACTSALLIHQSRTDPLLSLDTETGIKDRVEIYKISSALYTSNIALTKTLLDVIGCAEFNGDFKHNHPQLIRNNIEEIEQFARVCHLPRLAEPSFISNHIKLLHSEVLDPLHTLLAIALELPEDFFRNTHKHEVKSEDHLRYMKYTKFTPEENAAIGNNWIHGHTGTHM	KZV87659.1	5.6e-35	Clavaminate synthase-like protein [Exidia glandulosa HHB12029]	No differential expression	Not secreted	NA	NA	NA	NA
Lactarius akahatsu	Lacaka1|MSTRG.10610	5173	177	MTGGNTGRQPREEFVALGNMGYTNAVKAMMHTIGYLLYSIDAWNNALVRLGELVEGEDEETTERRRQYEELVANATKKIKEVNTLHDEVTKRRTTPDQRVIGFALHSERIEVSVKLHGFTKDWGLIELYEEKIDWFTFQGNKVYIGTSFSISFSISSPSLILSSVLADYYFSFLCRW	KIY44819.1	4.3e-51	hypothetical protein FISHEDRAFT_77229 [Fistulina hepatica ATCC 64428]	No differential expression	Not secreted	NA	NA	NA	NA
Lactarius akahatsu	Lacaka1|MSTRG.9579	2886	177	MKSLTGFISTAFYRRRAPGQWEKESHAHRRNDRVFYGLAVLAGTHWHETTSRSEGARTRTLMTPLGHPLAPPCDEVTQCAVHALIVGVIEYGHSGALTVLMSCRTLGQTGRLPVPGARVCIRILCHIAARGSSQFWFASLAPALLAALPLPISRFSPPFDKKWLVHFRVTAQYTCGR	NA	NA	NA	No differential expression	Not secreted	NA	NA	NA	NA
Lactarius akahatsu	Lacaka1|MSTRG.4860	1031	178	VVAGGWVPPDHGEDLLSGLPEVSGRGSTSATARRPSISSSSSMEGNAWENSTGVRKEVRGDEDVEDVGDGGPKAEGETNEWTGGGGLETLDEEDVLWLLVGDDNPRDCKELRMVRVLSEDVDVGERGIDKVDGISLETRLVVVLRTSLRPATTAFYLRWFLRIPFAPRFPEVVRGGVH	NA	NA	NA	No differential expression	Not secreted	NA	NA	NA	NA
Lactarius akahatsu	Lacaka1|MSTRG.8769	534	178	PRNRAQPLGPFLSLVKPEKLSLITILEVMHLQGTGGVANGMKAARGLVGVGKAIELEYKAQMCKKNNISMPSTARVGESGFFSRYSYNNLHARRVTARKYMEDAEEWTGDWTQSLRVRVGSFLVDRLMDVAKVIRTGLNKRTGDTVEEEQPAFTHSYEYLRGYKLGIIKLNPVVAERL	PSR76793.1	4.7e-66	hypothetical protein PHLCEN_2v8174 [Phlebia centrifuga]	No differential expression	Not secreted	NA	NA	PF14700.7	RPOL_N
Lactarius akahatsu	Lacaka1|MSTRG.9946	2965	178	MTSRSNPHEILAFYLTQVRKFFGGSSGGATTAIALPATSFSKPLVTCAVMLTCVLWLASLTVGLACVVFSTLLRQWIPRYADVDRPRYGLRSPEIVIAFAMQQGSVRNVEAVFRILREWLLVAVFLFLWGLDIRLLHSANSPPPLVVLGLSVTFFTGLCLILAACPRFPSSGVETIPV	NA	NA	NA	No differential expression	Not secreted	NA	NA	NA	NA
Lactarius akahatsu	Lacaka1|MSTRG.2936	3651	179	MRVTRTATPSYTWLLPTATPVSLVFVQNVPRLKSITADARLGRAFAELLDVLLPIVPSTLLSAQNHAGSTALHWAALNAQLGTARALIGFPAGPGADLIDIKNSAGRSPLGEAEAAGWDEGAKWMVEVMRLDDAGAAVGEEEEDAEAQKEVRDADGRVAHASLPAAFDMPDGGREPTSS	ESK95673.1	7.9e-29	cytoplasmic protein [Moniliophthora roreri MCA 2997]	No differential expression	Not secreted	NA	NA	NA	NA
Lactarius akahatsu	Lacaka1|MSTRG.8320	6168	179	MQALNLTNTLLHDLAWRYGHHQRSVIQMPDCELSASKRHQKVNLDVGDEVVVVAFEPLVRLFFDDDDDITRNHPRSLITLTREGDRLPSLHAFVDVYLEHLLLRNHLTRVAGLAFIAMVDDLAGSRAFVTWLLQLLNHGAHLTQCNAHSTALTGAALPHSTVLPTFAVALWTDNVTRQG	NA	NA	NA	No differential expression	Not secreted	NA	NA	NA	NA
Lactarius akahatsu	Lacaka1|MSTRG.9930	2691	179	MILKGIPDELASFTSFLLSSARLIHPLTTVDTETLIDHICKEADRLKYRRAKSQAGDEALTSESRKRRRKGKCHNCGKPGHWARECRSHKKEKSSNNSETMPVGTESNVVTAHDEDVDECWVADLAPGAPDSGDVALIGESNLLYERYENDVAAAAIAPASNDRGASSYYEPCIRTDVK	NA	NA	NA	No differential expression	Not secreted	NA	NA	PF00098.24	zf-CCHC
Lactarius akahatsu	Lacaka1|MSTRG.1399	11494	180	SSSISSRVPQNFSRHRALLGTPITSAFVCLITIERLTWHSPLIFIQTCNDDQLSPRRCLYIFNLYRMDEVTTSSHLMKMAQTGACMPNMERHHIFVVTASQSGTPLYKWDTCQTKSRISLPIVIRFPSSFKDGDEGNILATLEHPDRVRAIVLCVPSSQSDNLLRWHSLSCRTNPPFLNL	NA	NA	NA	No differential expression	Not secreted	NA	NA	NA	NA
Lactarius akahatsu	Lacaka1|MSTRG.4756	3362	180	GAGKTTLIEILATKNKTGYTSGSVRFPGDPSREARTPRVGFVPQQDVLPAMLTVSEALLFAARLRLPEYVTDAEKRQRVVDVLEQLGLTHVRDSRIGGRTSHARGISGGEMRRVSIGLELVASPDVLILDEPTSGAIVSFSLADIEITLFFVFKVWIRSPLLKSPRSCMQSRTTRTARPP	XP_007308576.1	1.8e-44	hypothetical protein STEHIDRAFT_102953 [Stereum hirsutum FP-91666 SS1]	No differential expression	Not secreted	NA	NA	PF00005.28	ABC_tran
Lactarius akahatsu	Lacaka1|MSTRG.6288	2764	180	MQASNLTATWRCCPARRSSLFYGQRITSPPEVPQSEADLFEIREHTFVKTTFGKRASPAISGRELDVSTDRNVAVNCRVCMEPAKKGAVLCSHCSLIAHSKCAGRAALTCDLRSKLLMHAHFAERGNSPAEFFTRLPNHHPASASSSRGSLDRDRDQRERERTNSPQLSPIIVPTSTDSV	XP_007304296.1	2.3e-20	kinase-like protein [Stereum hirsutum FP-91666 SS1]	No differential expression	Not secreted	NA	NA	NA	NA
Lactarius akahatsu	Lacaka1|MSTRG.6586	541	180	ISYEEMPVLDWACAFLSKFSGRRQRVQPHDLERLSTEDLKLLKSTLKGVRVTVTVPAGGRRPARPIKDLHADAGNYAFMKGDEETTIKVCHVIGLNKLLTTPFQDYYHEKYGFRLRFPRLFGIVVNVQQKTIVPVEICTIVGGQMYKKVLFPEQMSEVLQHATRSPRERIEAIERGVQGD	XP_007301197.1	9.7e-19	Piwi-domain-containing protein [Stereum hirsutum FP-91666 SS1]	No differential expression	Not secreted	NA	NA	PF02170.23	PAZ
Lactarius akahatsu	Lacaka1|MSTRG.9643	9412	180	MGPRSSSIRIKRAFFQFPRLASLHPNSRSHYYVCKMRTLIAMTLLLLFLSVTASPLKQAKIKRGGLDGRDKGRDPRPTSTMTASKHWHHPHPTPSETPCSSNAHSKHHPTPTKHHHHKHHPTSTPSKHHPTSNKHHPTSNKHHPTSNKHHPTSSKHHPTPSISKHHPEHPTQTANNYGDV	NA	NA	NA	No differential expression	Not secreted	NA	NA	NA	NA
Lactarius akahatsu	Lacaka1|MSTRG.11985	2166	181	MVVARPLIETFGAQRPFSVPYTIPLAPFGDAGCPCDDPTDRPSPIFDVPAVRHFLEVHPVHPCRADANFFGLCAPVLMTSRGFKPPTSINPLVFQVFQATVHATYRSYPACTGRVHCATDVECIWSRTPPFLTVPANVAGADAIWSAPGEPSKTPVFFFFFPIPVLGRSFISSKSGFPENL	NA	NA	NA	No differential expression	Not secreted	NA	NA	NA	NA
Lactarius akahatsu	Lacaka1|MSTRG.8111	4368	181	MRDWESSRPQGSRQNYRLGTPFPSYVAPRGRESAPRKFSSPETTSGDDAFDSGNDDDDDDVLILSDETSSEVRAASPGAVSPPKKRARSLGEMDLDSPQAAHSILPELSHTVASSSTSSLLSLSPSVILPPSTREEKAIAALTLALANGAAGINDYSAVREALGASAALAEGASEVGEMWR	NA	NA	NA	No differential expression	Not secreted	NA	NA	NA	NA
Lactarius akahatsu	Lacaka1|MSTRG.958	1515	181	MKRDPVMKRNPGGDSDRPQVDAGEILDEPAKDTEKPVPLRALLTRPVVVSVANYGMTGMLDMTAGTFIPLVWSTSVEFGGLSMNPASIGSWMAGYGLMNGVFQFVAFPRIVRRFGPRSVYIASIILFSLVYILLPFENLALRHSGHDLNPTARLLIILQLSAFTFSGMGFGTLPRTLHFAW	KIP10447.1	2.9e-23	hypothetical protein PHLGIDRAFT_230128 [Phlebiopsis gigantea 11061_1 CR5-6]	No differential expression	Not secreted	NA	NA	PF07690.17	MFS_1
Lactarius akahatsu	Lacaka1|MSTRG.4444	3584	182	MTRNQARNGLCKSARFGILVHAFVLSGDQSRNFVTRPRERWSIKAVLSSHPLQRPTRAPRIQTNMTDSSEPRFVDTTLEYFTPPADGSKPWININADLTTGVRASNWKYTTHNVKVENLRGRAEATLDKNGFQFFHHPAKHTSFANDEEILREYYPESTELLKQLTGASRVVLFDHSEFVRP	KZV75233.1	1.3e-31	hypothetical protein PENSPDRAFT_748617 [Peniophora sp. CONT]	No differential expression	Not secreted	NA	NA	NA	NA
Lactarius akahatsu	Lacaka1|MSTRG.10660	3546	183	MGNSHSHSQPAATEVHRPRLLKHYKSSPLSLRPSRTRDSPPISISSSSSLNSFSEKDIERERENRRPNRITSSHARLSPPSRATSVHPPPVPAYSPHILLPSPAAGFLSPAPSRGLVSDYDAAYARFLHDYPQYASSWHVDALRRSEYSRLGPDETYVDYMGGAIYPTSLISVHAEFLQSAVL	XP_009553088.1	3.1e-20	hypothetical protein HETIRDRAFT_68211 [Heterobasidion irregulare TC 32-1]	No differential expression	Not secreted	NA	NA	NA	NA
Lactarius akahatsu	Lacaka1|MSTRG.2935	10725	183	MTSLIPSLFLTRRRRLQSETINRLLKKKSGTRNRRNALATAEDRTPATQTGNGTPVEGEPEEEESGEVAAVPIVEVVPTCYRWISTSRPAPDAPSGEEKMTLSFSVPASLLPTSHQAAVEGDGDGDVKMKAQEEPRKPPAPAVCNVDGCTATRKYRLVRDLERGACGMGHLHLLETQSRAVAT	RDX55993.1	4.4e-27	hypothetical protein OH76DRAFT_1460659 [Polyporus brumalis]	No differential expression	Not secreted	NA	NA	NA	NA
Lactarius akahatsu	Lacaka1|MSTRG.9583	2603	183	MMFSKSSAMVGYDLCRFAACVSIHGRFSIGCVEVAMLLGPEVVFLLLFEQAHFTDARLFTALTSCIVSHLPGALLDIIISIPYTLLSVHRALSQNRTPAIASEPELPAPPYTRPSPPEAPADVGKESTDSPQTSSERDGSENGSEADVESNDGAGVGESWISLKPDSTRISESSEGTAEGTAA	EPT04109.1	3.3e-06	hypothetical protein FOMPIDRAFT_1158213 [Fomitopsis pinicola FP-58527 SS1]	No differential expression	Not secreted	NA	NA	NA	NA
Lactarius akahatsu	Lacaka1|MSTRG.3514	936	184	MSSDNDNHDHDRHHSEHGLTLDLQGALASHDYDTDTASQHSISFTSPAASTSTSPHHSPQLPTFSTVDTARRQSHPYTTSTESSDDPDDISLSTGHTSSVTSPGGSVLDHDEDAKPVPPTPLPAALERNAYPPAQPWSPGRSSVASFATSTSSFSRKVRPESLLIDPPKGPLILGIALVDFNHQ	XP_009546056.1	1e-18	hypothetical protein HETIRDRAFT_173094 [Heterobasidion irregulare TC 32-1]	No differential expression	Not secreted	NA	NA	NA	NA
Lactarius akahatsu	Lacaka1|MSTRG.6528	1264	184	MFSRVLLLRCRYRAHLTKEQVADLVAPRSQTLKLVNSWLEHHSISSSSVSMTHGGNTLKLKGMSVTQANTLLGASYQVYRHVERGETIVRTVGYSLPRALHWHVLTVVPTTSFVSPRTQWQTPRHRSSGETVGLVKSASGEPATTLSGREVVNYVTPPFLRWLYDTVAYTPNAMGENVLGVVGF	KZV60531.1	9.9e-27	subtilisin-like protein [Peniophora sp. CONT]	No differential expression	Not secreted	NA	NA	PF09286.12	Pro-kuma_activ
Lactarius akahatsu	Lacaka1|MSTRG.6961	2405	184	MREPKVKIRGFLDALDLLGGQRNVQRGDILIELFDLSATDDREHVGQLLQVVRDRDCSSVFVSPCPNFWRSKDVVPPLTRCDALRTHFLPNLLEHVAHLFLLRGALPIGAEDHTTFFAALLAAGFFSVGANLPTAKNPPRSKRKTLRARHGDDVPLEGPIENRPVTLVDAEGCLAVVLGVLVRL	NA	NA	NA	No differential expression	Not secreted	NA	NA	NA	NA
Lactarius akahatsu	Lacaka1|MSTRG.8253	11599	184	MFLSEQTSDGERSDFSDGEFSEVDSDDDEDSARAARQDALEKLVPGIEPSEYGRMPLSFYNRSQRVARVAPENEDTAAEATTSDAGLPHSLPKPSRAPLLSRDRYEGVDSDDDTDESDEPADEDEDEQPELVGEVEVDMAEEEEEFLEFSRQALGISDEHWQQILQERRDRGGQPFMLHAHIFC	KZT23749.1	8.1e-37	SGT1-domain-containing protein, partial [Neolentinus lepideus HHB14362 ss-1]	No differential expression	Not secreted	NA	NA	NA	NA
Lactarius akahatsu	Lacaka1|MSTRG.8313	1082	184	STAPKILSYVQQTLSAHGASSVTVVGHSLGAALALLDGVYLRLHLNATVKVRVIGYGMPRVGNQAFADWVDNHLSGQVTRINNREDAVPIVPDRLLGYRHASGEVHITDSGLWENCPGELFSSLSGVLVWRSADESARRVAFQVRTILPLCAALAMSRPSWRATRTITTGPTVASLCTADILEA	PFH50220.1	2.4e-36	hypothetical protein AMATHDRAFT_193502 [Amanita thiersii Skay4041]	No differential expression	Not secreted	NA	NA	PF01764.26	Lipase_3
Lactarius akahatsu	Lacaka1|MSTRG.3460	6016	185	MHPLLSYTRLHHAPISYDISFTPSARTVVDRTIHAPVPAVTLAQPATEPPIPASSRLVLRSPKLPWTVAVGPIGSPPSFFIGKSGHQRKATTSAALTNLDVLYAVHTTLMTRVTPEEWAALGEGSRAQRRVAEAYKQRCTRMGGGWEGGIRRVDWLGSKTHLVGVEIDKSNEAGENVGRLVFGRA	KZV74316.1	3.7e-74	hypothetical protein PENSPDRAFT_216293 [Peniophora sp. CONT]	No differential expression	Not secreted	NA	NA	NA	NA
Lactarius akahatsu	Lacaka1|MSTRG.8444	7423	185	MTDMFDEAAHPRLRDPTSSKDLYGVSRSILRILSAAHLQEGDLASKLACLLFIRLVSLSLDVGPVTPLRIETRGDALLTMLHIWYVTFSSQPCKASARAIICATLERTTACELRGFPNAFLCEIHLRHSSMIMRCARVDAQIMTQRSWLKLLRMTKIPPSSGPSVFSTGTRTLSKVTKAVPAVGE	PSR72963.1	3.8e-10	hypothetical protein PHLCEN_2v11200 [Phlebia centrifuga]	No differential expression	Not secreted	NA	NA	NA	NA
Lactarius akahatsu	Lacaka1|MSTRG.3513	4345	186	MRTILSACDFSRRRIVRMRASEVYLYVSVTGLDNTLTIKDLPVCQKVIASITPQYLIIASLESSSTFSSLPGTPTSADLSLDLSTMTPSHCGSTIELWITYHQASRKHKQVTAQLIDVGEQSQLFDLEDVLDHIFQQDFVDPKWRSVVWWEDCTGARLKASDTVHGLLARGAGGTPGTALRLIIGE	KDQ62702.1	2e-19	hypothetical protein JAAARDRAFT_54605 [Jaapia argillacea MUCL 33604]	No differential expression	Not secreted	NA	NA	NA	NA
Lactarius akahatsu	Lacaka1|MSTRG.4459	9238	186	MESRDGRDLLGNRPRKKLGEIGGPETWWVERQQALEHAGYMLRPRYRPDWTPSWAGTDKLPLNFEDGHRQLVRQLYLHLDDRAYDVSSQRRLCMDATRISDGKPVMLKRLLEKEGPHELQINKLFSAGPLASDPRNHCAPLLDIIELPNDPPIMVHALLRSFYDPKFQTFGEFVTFVAQICEVSYV	EMD36447.1	7.2e-33	hypothetical protein CERSUDRAFT_115467 [Gelatoporia subvermispora B]	No differential expression	Not secreted	NA	NA	NA	NA
Lactarius akahatsu	Lacaka1|MSTRG.7272	2708	186	MDLQRIQTGRAGESNISCSIGFFSGDQKNLSHDNTLTLLKNIAKVDFDPLQCLTLGFVHAECPRENEWYLTNVSNTNSGIMLTYLCPGCFDISQSAINGKFLRDTEVLSVIHELDQGPPCGGLLDSIKTFIFWCLTTGEIHSTASSLKVCEETDHFSSGPIDQMALHKVLKSGLQPWVGIRIEDVP	NA	NA	NA	No differential expression	Not secreted	NA	NA	NA	NA
Lactarius akahatsu	Lacaka1|MSTRG.8687	1845	186	MLTLSMLAERHAADYISSRRLLLSLADAGGRLMYAYKDILELAGLTTRLYALLSSLHNLPPLPAYSPADGGPSRVTLDNVDVSIPASGAQEAPLVKDLSLSLSAGDHLMITGSNGVGKTAVARVLAGLWGAGNQGECKMHRPGRGELFVVPQRAYMVTGSLLDQYVSCVGEICLAADIWGCFGFKG	XP_009551832.1	4.2e-49	ABC transporter, partial [Heterobasidion irregulare TC 32-1]	No differential expression	Not secreted	NA	NA	PF00005.28	ABC_tran
Lactarius akahatsu	Lacaka1|MSTRG.4318	3722	187	RLRPGTGKSTTVVESIMQLLHRDDGAKVLACTPSNAAADVLVELLARAGLTVDQLLRLNARSRVMESIPVGVLAFSASPERAKIRTYRVVVSTCSSAGRLLMQKIPTGHFSHIIIDEAAQAEEPLSLIPIAAFSSTSTNVILAGDPRQLGPVIKSNPASKAGLGKSYLERLMDISEMYGLDTQVATT	KZT37876.1	1.5e-38	P-loop containing nucleoside triphosphate hydrolase protein [Sistotremastrum suecicum HHB10207 ss-3]	No differential expression	Not secreted	NA	I01	PF13086.7,PF13604.7,PF13245.7	AAA_11,AAA_30,AAA_19
Lactarius akahatsu	Lacaka1|MSTRG.5114	4975	187	MSTQLIGFSIGGICKRFLVDPPSMIWPSSLVITALFNTMHSLETTGTYGLSGISRVRFFTYVFIGYFCYSQCVSRFFGLPSGLTFPLDFVPSYLFTGLSSFSWVCWIAPNNAKVNQLFGVTHGLAMGVLTFDWGQITAFSGSPLPTPWWAAAHTGIAIISFAWILAPILYVSSMCRLFVSFYMTICP	XP_009551263.1	3.1e-52	oligopeptide transporter [Heterobasidion irregulare TC 32-1]	Induced during mycorrhization	Not secreted	NA	NA	PF03169.16	OPT
Lactarius akahatsu	Lacaka1|MSTRG.7123	10688	187	MDCFRPSDNRICFRTLTGIFIQAWQQLTGVNFIFYFGTTFFTNAGIHSPFLISIATSTVNVGMTLPGIWGVERFGRRSLLLVGAVGMTICEFAIAIIGSTTKTTNQAAQSAEVALVCFYIAFFASTWGPVTWAVTGEIFPLKIRAKAMSLSVASNWLWNFGIAYASTFFVISEFYHVLIPFDSPLLG	PFH51820.1	3.3e-70	hypothetical protein AMATHDRAFT_141714 [Amanita thiersii Skay4041]	No differential expression	Not secreted	NA	NA	PF00083.25	Sugar_tr
Lactarius akahatsu	Lacaka1|MSTRG.9342	2570	187	GLSCLPPIRLKSEAELENQKNPEASHLINDRPTEPDDENVPPVDARPPPIIVSPDSETRILVESPVAAEGVTSIASATLGHANQPGYHDSPPVQATTPPTAMRSRSSSPTPVSGDIILPLMIFAVVKANPSHFVSHLLYTQRFRNQRIGGEESYCLVNLMAVADFLENVDLKALGLGESEKKVMRFA	XP_009549422.1	1.9e-41	hypothetical protein HETIRDRAFT_420333 [Heterobasidion irregulare TC 32-1]	No differential expression	Not secreted	NA	NA	PF02204.19	VPS9
Lactarius akahatsu	Lacaka1|MSTRG.9773	1272	187	DLIRNAHNLFDERPSPSPPVPSPDLAETSSIHTCGSFLNPDLLRLPEVQAMGPTIRHHPGLVDGNPTSTESRFTPSPGPLLSPLLGLSSSQTLTEGAEMTTQEQAVSEVRGTKAVETLLNGTPVGVVSVPPTSVTEWQLRQSRLSPPPHSEAATIPQSPSESLLSSTSDFPLSSATSLQTRMGRFSP	NA	NA	NA	No differential expression	Not secreted	NA	NA	NA	NA
Lactarius akahatsu	Lacaka1|MSTRG.11514	2465	188	MSQYGRLAAAKWLLDRGADVNSQTKTGWTPLHLAAAFGHLEVARILLEYNAEVNTRNVDGDTPLILASANGKPDVVRLFLDHNVGAYDHDNYGNTALHRAARFGSLEATRILLERREVEVNPQNKYGSTPLHLASGGLVEGNPDVVQLLLDHGADAQLRDLSGKTPSEVADGPRKQTIVRLLSQHAAQ	NA	NA	NA	No differential expression	Not secreted	NA	NA	PF13857.7,PF12796.8,PF13637.7,PF00023.31,PF13606.7	Ank_5,Ank_2,Ank_4,Ank,Ank_3
Lactarius akahatsu	Lacaka1|MSTRG.4760	1251	188	MLRYMSRVSLSFKSTLLLTDYLEIIVNFNPLTTDTMSRVIKFFIAFNSRTFQVVLSAGAMRSAGLKKHPREAPCPPASQSLSVIIVLILYVCEMFWWHLSRKQAVMLVELDKLKHGHQEHQNEIRAKLVAIVGDRFLAHVKNLNAIGWDSCLTNFPVWWPRNTQWGVISHLVSFVEALRLLRIRTRLL	XP_009543053.1	3.1e-36	hypothetical protein HETIRDRAFT_457715 [Heterobasidion irregulare TC 32-1]	No differential expression	Not secreted	NA	NA	PF07928.13	Vps54
Lactarius akahatsu	Lacaka1|MSTRG.6596	2228	188	MQRRPAFGSVFLLNNTAYLCAKLLEPRAPVRQILSRPTLDAINSNFRTAKAGYFDSNFSPLVQVLAEDKEKSGGAGKTAAKEKFTRFFDLLDEIKERHQLARVLEDDEEQRALLEDEVVKLVVPSLQRFTQKMREKEFSKSELRGSNFSPMRRAERATLQIRLSVSFDCFAKGARARSLSLYRYQDDS	XP_009551938.1	1.3e-50	hypothetical protein HETIRDRAFT_390036 [Heterobasidion irregulare TC 32-1]	No differential expression	Not secreted	NA	NA	PF03081.16	Exo70
Lactarius akahatsu	Lacaka1|MSTRG.6814	3508	188	MDSEVARWFCRPSHSPTFHPWSVYPSPPFLSRFLAHPRSCFYSYAVFPLSGNPGLLDVYIPFLDAIYSVANSSVAIFAHAHLGLSSYIGGDRSFPDTSSVTLPAQIQAHVEFLDELLAAYGPETSVLLVGHSIGAWFIQEMMKARATDLRSRERVGAFMLTPTLSEIGGSPNGKTLSVRTFTVAIPDI	KIL71764.1	1.2e-19	hypothetical protein M378DRAFT_20035 [Amanita muscaria Koide BX008]	No differential expression	Not secreted	NA	NA	PF10230.10	LIDHydrolase
Lactarius akahatsu	Lacaka1|MSTRG.11241	2258	189	MSHPPSTSTSSVPSNFQSIFNAALKAYKKKTKNDLLAHPLTAQLQACNSPADILAILQDKVEEFDQSRSADERSSRWLNPTINILCALSATLGEGIGLVSPIKPTCPLHRLYQFQVFSPAKVISAGVGVLLSVSIFLDPCPEAIPTLASVSGGQGCSKRAKTTLSISSGALRTSSSASSLIPQCNRQTQ	OCH87062.1	1.2e-11	hypothetical protein OBBRIDRAFT_182826 [Obba rivulosa]	No differential expression	Not secreted	NA	NA	NA	NA
Lactarius akahatsu	Lacaka1|MSTRG.4293	570	189	SNVTFKIAEDIVSRPYFALNGFLDDQTETFSRAIALDFAVFAISRDLGTIQATEDPVVWTVGLTMDQVINYTDPLGAAPRQRSLFYKTRYSDDTSLVSVNIHGGISSHVISQIVDFLGDFANASSRAQKLDQKILQGAAPVSDLLGDLVSLATAQVYGSTHLTIGTDANGNYNESDVMMFMKNIGGLKT	XP_009550955.1	2.1e-32	hypothetical protein HETIRDRAFT_173902 [Heterobasidion irregulare TC 32-1]	No differential expression	Not secreted	NA	NA	PF17168.5	DUF5127
Lactarius akahatsu	Lacaka1|MSTRG.4716	11667	189	MATVRKALKNIASGKGPQKLRPPTNFESDDSAEIELASLLPNAIPTQYPPLVLVHVLLLSAALVLLPQTPLPDLPLPPPARGLDKPQHPFLVPITARPVLTLAWACLGATLLVPWWAGSLRRWLHDGTLGSRNIQLRLRGDPHKRRVRLVYFYTLLRTHFFPTTTFLSAYRTSGTRLSSQGTPPLCCMQ	XP_009551046.1	1.4e-15	hypothetical protein HETIRDRAFT_240833, partial [Heterobasidion irregulare TC 32-1]	No differential expression	Not secreted	NA	NA	NA	NA
Lactarius akahatsu	Lacaka1|MSTRG.5176	2511	189	MAQLFRNPRSGNDWTANELSAYNITVVPQSKEVFFGTIDFPDPTDPSLAGFMATESRQHVADTDKRTKQLLHHLDLAMEPKIGQEAAVDNFAAELLKCLGYDDENRIVFIRHAIPFLICGENLVAQTDVCVMDDNEILLLLQEDKRLSNMIDPEPQVIAEAIAAFALNNRKRERQLNLPHHGWHHADLL	KIK06384.1	9.1e-60	hypothetical protein K443DRAFT_674367 [Laccaria amethystina LaAM-08-1]	No differential expression	Not secreted	NA	NA	NA	NA
Lactarius akahatsu	Lacaka1|MSTRG.11389	4362	190	ESSRRSAGVVDPSGPSQLVFVLPARLTVNSIAIVHSRNMTLDADGTAVGEPRRCVSRLPPPQVSYLSRLSRRALEEAEAKDDDDDDDDDEEEEDSEEESSDEEGGDGGPSSVPDGPELSRAERRELKKKQAEQAAAKIAEEEGEDDLTANPNRLTKKLNISDLSTPRELTRRERCVISFPNAHPLTIMYI	RDB23881.1	8.7e-10	heat- and acid-stable phosphoprotein [Hypsizygus marmoreus]	No differential expression	Not secreted	NA	NA	NA	NA
Lactarius akahatsu	Lacaka1|MSTRG.3668	4072	190	MADIPASSSSQTAPPTSPLPEIHRDSDPDPTPTVTVVAPSEIVAETKPDESTTSLPPAPPPQSPEQPPGIVDRPATVESHPPDPAPALRARPRSESERPLPAVPANADVTLSPRAQASLRAHVVSDPGHGSTRRPPPVQPLDLPGSGIFRQRPAIHPGEFEFPDEWTAARVMSPSQVRPLAPAWFGHHVI	NA	NA	NA	No differential expression	Not secreted	NA	NA	NA	NA
Lactarius akahatsu	Lacaka1|MSTRG.5845	4488	190	MPHSRFCTFHTHSGAAQSSCCTTSGVTPSSVRGRGSFSPSPGALATTSALTGNPSVIGNYKPTYSVFRRLSHQARSAPLSFTSRDDKPKLLSTRVVRHPISPLARIWSAFIRNTAAANAVLLDAENDRIHVDFEDVYVAEDLQTITDSYAEIPAGIRSQLLGRVMHRVMTQAAIWTKRESWLRRTPIPGI	XP_007301032.1	3.1e-07	hypothetical protein STEHIDRAFT_153795 [Stereum hirsutum FP-91666 SS1]	No differential expression	Not secreted	NA	NA	NA	NA
Lactarius akahatsu	Lacaka1|MSTRG.8884	668	190	ALSNPFDVSSDREKASPARDDNISSASSNPKLHHARASTNGLEWQIAEGMFETTLSIANVYFRRGSVREAEYFIRESERFARSMNAPAMLGRALALQVELQLQLRQLDTALTTLRAATDVLNDMTSPDAARLHKLRGEYNELLLQDKDARLQYAEALKMLEELDKTFSGFRPLPRQRFSSSEGRPELTIL	XP_012185658.1	1.2e-27	predicted protein [Fibroporia radiculosa]	No differential expression	Not secreted	NA	NA	NA	NA
Lactarius akahatsu	Lacaka1|MSTRG.9346	2427	190	MISYWVDIASARSILTLHHLAVLHINGLEVLPSGTESHTPIVAVLVSSPIRSQWPTVIGPVRAPIYGRPTDVNRAAETRPFTIVTYKPFFSHCTMALSAVDLSTLSPLLPQSHLRSQECEVSLRSPPSSFSSSPVTSQLLRSTLRTVACPGNGYSLAFCLCGRWVDGRNVDVQLPWPKCMYGRSVYDGNM	NA	NA	NA	No differential expression	Not secreted	NA	NA	NA	NA
Lactarius akahatsu	Lacaka1|MSTRG.10497	9581	191	MTPELPARSGRSSPLSAPDLPARTLRNAPVPSPLTVASTPPPLPRTLSSASHPSTSTSSLSLSLDSSPSPTFATPITRRTRSPRPPPSASVKTSSRSATPTPAPATPPRGSAPTPSRAGMSIPARVPTPTPSSIRSSSPAPVPLAAPAPRGGTFPRGINPAPPPRSRDRPGSAAGRERPPPVSVPKREGYF	NA	NA	NA	No differential expression	Not secreted	NA	NA	NA	NA
Lactarius akahatsu	Lacaka1|MSTRG.2718	5005	191	MVFGLFLNLAFGTYVRECSLCLLTFYSVAGTVSNVSYVFPFFTAIIGKKSPLLRLRALCKERALERLRMGANRKDLFYYLVSSLARSLTSSSHRTRSQSGEELPESERPSPADIAQDGQLAIIAGSDTTSSVLTATLYYLLRNPVVYERLQAEVDSAFPSGEEPLDVAKLSQMEWLNGCMWVCGALKRTRN	XP_009543489.1	1.4e-23	hypothetical protein HETIRDRAFT_472015 [Heterobasidion irregulare TC 32-1]	No differential expression	Not secreted	NA	NA	PF00067.23	p450
Lactarius akahatsu	Lacaka1|MSTRG.6031	710	191	SSAGGAPTSLTDDPYIHWLNYLLDQDNVNIPQTISTSYGGYEHTMQLEYVVSVCALFGQLGLRGVSVLFSSGDYGVGVGDCLVPHNSGESVQFLPVFPATCTWYFSFFSLFAVYRRKYSRSPGRAFVGPWVTSVGGTTGHDPEVAASLSSGGFSIYFARQTYQADAISTFLQNLGDKYNGLYKSVHDPDLT	XP_007864796.1	2e-38	subtilisin-like protein [Gloeophyllum trabeum ATCC 11539]	No differential expression	Not secreted	NA	NA	NA	NA
Lactarius akahatsu	Lacaka1|MSTRG.9696	1036	191	MHVTFPTTPAQYFHLLRRQIKRNFRKPLIVGAPKGLLRLPVCFFGSRVRGLIDPVLQAASSSLSDLEESRTFQPVLRDPLVEAQHAERVVLVSGKLYYDLVKEREARGLQERVALVRLEELCPFPFDALREVLRGAGEVRWVQEEPRNQGAWTHVASRAAQVLGRPLVYHGRREDAVPAPGVGKLYRTQQE	XP_009549795.1	8.7e-58	hypothetical protein HETIRDRAFT_157309 [Heterobasidion irregulare TC 32-1]	No differential expression	Not secreted	NA	NA	PF16870.6,PF02779.25	OxoGdeHyase_C,Transket_pyr
Lactarius akahatsu	Lacaka1|MSTRG.8243	3405	192	MAYPTPIVFYSTGGIAQTLDSGEPAPGDMFLESLKYSLKKADIPQTISISYGTYGLFRRNIRRPCVPCLHSSAPVALASSSLQATAASARTARTSRESSVSSLNSLLHVRVAFYRPLKVLHKPAVVSQVPISLPSAALHTTTPRLRLPSPEAAFRITFHARATRTSPCPHSSSAKAPSMLASTSAIVAQAVT	NA	NA	NA	Induced during mycorrhization	Not secreted	NA	NA	NA	NA
Lactarius akahatsu	Lacaka1|MSTRG.10953	3510	193	MGIGKRGNQVNVIDFGLAKKYRDPKTHLHIPYRENKNLTGTARYTSINTHLGVEQARRDDLESLAYVLMYFLRGALPWQGLKAATKKQKYDRIMEKKMTTPTDLLCRGFPNEFGIFLNYTRALRFDDKPDYSYLRKLFRDLFTREGYQYDYVFDWSVQRGAQDEVASASSKAAGGRRKVVQEDEGEPRTSDRQ	XP_007265358.1	1.5e-97	kinase-like protein [Fomitiporia mediterranea MF3/22]	No differential expression	Not secreted	NA	NA	NA	NA
Lactarius akahatsu	Lacaka1|MSTRG.5353	1200	193	MALITAHFRPEQLVFADESHFNRLTLRRPYARSMRGERACRFEFFLRGTKYTMLYAISLDGILHLEVVENAITGNIFRQFVEGLLPRMNKWPLPNSVLVVDNAAIHKVAGIRELVEGHGARLLYLPTYSPDLNPIELAFSSIKAWLRANRARINADLESGNGNVYNAFWAAVYSVTADNAKGWYKHCGYQVPP	OJT10703.1	5.1e-50	hypothetical protein TRAPUB_12796 [Trametes pubescens]	No differential expression	Not secreted	NA	NA	PF13358.7	DDE_3
Lactarius akahatsu	Lacaka1|MSTRG.5934	2037	193	MALITAHFRPEQLVFADESHFNRLTLRRPYARSMRGERACRFDFFLRGTKYTMLPAISLDGILHLEVVENAITGNIFRQFVEGLLPRMNKWPLPNSVLVVDNAAIHKVAGIRELVEGHGARLLYLPTYSPDLNPIELAFSSIKAWLRANRARINADLESGNGNVYNAFWAAVYSVTADNAKGWYKHCGYQVPP	OJT10703.1	7.2e-52	hypothetical protein TRAPUB_12796 [Trametes pubescens]	No differential expression	Not secreted	NA	NA	PF13358.7	DDE_3
Lactarius akahatsu	Lacaka1|MSTRG.6915	5700	193	MHLALVGSLSTMQTLQVHVPAAFVGTFIPAAAQLNPPDGGATGLGGSGTAEGAELFGSSQEAHLTRAASLSTMQTLHDHVPGAFVGIFIPAAAQSKPPFVAGAAAAATPFVVESGRGSSHAAHLALEPSLLTMQTPHVHEPVAFAGGFTPAASQLKAPGAADLAPRTNENVGREDGPAAEAALRSLSCCFDAV	NA	NA	NA	No differential expression	Not secreted	NA	NA	NA	NA
Lactarius akahatsu	Lacaka1|MSTRG.7340	1699	193	MALITAHFRPEQLVFADESHFNRLTLRRPYARSMRGERACRFDFFLRGTKYTMLPAISLDRILHLEVVENTITGNIFRQFVEGLLPRMNKWPLPNSVLVVDNAAIHKVAGIRELVEGHGARLLYLPTYSPDLNPIELAFSSIKAWLRANRARINADLESGNGNVYNAFWAAVYSVTADNAKGWYKHCGYQVPP	OJT10703.1	1e-50	hypothetical protein TRAPUB_12796 [Trametes pubescens]	No differential expression	Not secreted	NA	NA	PF13358.7	DDE_3
Lactarius akahatsu	Lacaka1|MSTRG.783	3526	193	MALITAHFRPEQLVFADESHFNRLTLRRPYARSMRGERACRFDFFLRGTKYTMLPAISLDGILHLEVVENAITGNIFRQFVEGLLPRMNKWPLPNSVLVVDNAAIHKVAGIRELVEGHGARLLYLPTYSPDLNPIELAFSSIKAWLRANRARINADLESGNGNVYNAFWAAVYSVTADNAKGWYKHCGYQVPP	OJT10703.1	7.2e-52	hypothetical protein TRAPUB_12796 [Trametes pubescens]	No differential expression	Not secreted	NA	NA	PF13358.7	DDE_3
Lactarius akahatsu	Lacaka1|MSTRG.8588	1672	193	MSRVRLPSVRLENQLMLTAAEVVSDARQNFASSNISLLPPLPVAPGPQTRRPSRDRSYENSCNSTRPSRKAPAANQIFHLEEDSSADQSGLSLATSAHNDSALSDAPPAFQPGGPSRSAFSFDSPRPTRRATVLGRSPETSRSLDIDVDMTPSKRREKSKSANDLKRLIRPISKVQFELDKRECNYDTLFPLQ	XP_009545987.1	1.2e-14	hypothetical protein HETIRDRAFT_451140 [Heterobasidion irregulare TC 32-1]	No differential expression	Not secreted	NA	NA	NA	NA
Lactarius akahatsu	Lacaka1|MSTRG.3489	7560	194	MCSRHLPPSLPLSNVTAISNFVEHSAFSPFFFLFFESVPTSDFVNISRIRPLSNPQHVLCGSAAEFGVLPTLLRTRFPGGDVRMGAAAPVQILMWPTTTLGGAAHSPRNPAPCVFATARLQGIGITHVLSSRNGGVTTPHPQGAPCAIHAWRFSFYVCDTLPLLFLFRLLRPRPAPPQRQTAHPRGSAPHHLII	NA	NA	NA	No differential expression	Not secreted	NA	NA	NA	NA
Lactarius akahatsu	Lacaka1|MSTRG.6590	7220	194	MPVPDVTSPSVGVYGQPWNASPSGRSYTSNGAQPPGGTPQRQPSYRPPGASAPRIPGHAAGLDSRDDSSSASPSADHHSSVNNPSNSNSYFSPDTNYSSALFNVSNIPPPPPLNPLSHAQPSSRLKTHDHESSDDILAPGALGFARPLSHSESSHFFFLDIRRAKRTVVIRLQFPAASIRCDQPAPFRPPLVRT	NA	NA	NA	No differential expression	Not secreted	NA	NA	NA	NA
Lactarius akahatsu	Lacaka1|MSTRG.8235	1822	194	MVSITSHTPDTTPRSNTVSVYSTPLTAPQSPTPLPAWKAVPPTPPAFYPLSPPSNPPVRRRTHPRPASAILSGTDAAAAQRRMSLPARVIRTAVAMTPPSAFRTHERRSSLGSAARKLFHIESDDALSDDDDDIPLPPSPRGQSSVEDELIPKRGLSQRQHALLELLVSERTYLTDLRVLVNVRICVVTAVALY	NA	NA	NA	No differential expression	Not secreted	NA	NA	NA	NA
Lactarius akahatsu	Lacaka1|MSTRG.9108	658	194	LMYVEFFHRLQSWIITHSSRSAIIQEVDRMRKAGLAMMAYFFFDFRDTQKQHRRGLISSLLLQLSARSDACYHIFSRFYLDHDEGAQQPSDEALSQCLIDMLKVPGQPATYIIIDALDESPNISGMPTARENVLQFLESLVVSEVPIHICVSSRPEVDILSTLEPLALFRVSLHEESGEMADISGYIKTVVRPD	OCH92518.1	3.7e-32	hypothetical protein OBBRIDRAFT_426819 [Obba rivulosa]	No differential expression	Not secreted	NA	NA	NA	NA
Lactarius akahatsu	Lacaka1|MSTRG.11984	5073	195	MHQDHHPPRPYVGTPATYGSTYAFQATPNATMTHGTSRAPTQVQASGAYYASQITPQQPAVTTASGRSPALSPPAYPSPSPNSRPPPPSTPPSNPPYYRPSDNNRDRTDSRGFQSYAGGSQQSQGTNGGRQGNHAPVFAGPRVGAGTPTAVDADRGGRYRVGPERLAQGQPMARKYLDAAWGVTPGTKESLGLTD	NA	NA	NA	No differential expression	Not secreted	NA	NA	NA	NA
Lactarius akahatsu	Lacaka1|MSTRG.5152	1251	195	MAPDYENLMLLQKIEVFEYALENTTGQDLYRVLWLKSINSEHWLERRATFTRSLAVNSMVGHILGLGDRHPSNLMLERKTGKVVHIDFGDCFEVAMHREKFPEKIPFRLTRMLTHAMEVGWVSLRLSAARNLLPSPQVSGIEGSYRNTCEITMRVLRDNKESLMAVLEAFVYDPLINWRLMPTKGDSRRPPGELF	XP_007304503.1	2.9e-85	atypical/PIKK/FRAP protein kinase [Stereum hirsutum FP-91666 SS1]	No differential expression	Not secreted	NA	NA	PF00454.28	PI3_PI4_kinase
Lactarius akahatsu	Lacaka1|MSTRG.6607	9658	195	MAVCEAGLAILAYFYFDFKDLSKQTCHDLLLSLVSQLSTRSSPCCDILHHVYKAHENGTRQPSDDTLKACLKEMLRLPGKGPIFIVLDALDKCPDSSGIPSPRDEVLQLVKELVDLRLRGLHICVTSRPEVDIRAILEPLAFRSVSLHDESGQKIDIADYVRNIVNSSPSTAMRRWRADDKTLVIETLTERADGM	OCH90532.1	1.7e-45	hypothetical protein OBBRIDRAFT_592935 [Obba rivulosa]	No differential expression	Not secreted	NA	NA	NA	NA
Lactarius akahatsu	Lacaka1|MSTRG.6694	9558	195	MLPAAGDQSIRGEGMSSMGKLVDVFKSSVGARSLDRYKGYCSCSGGCNDLRFVNLITTMTSRLKDSNKDWCGMEARCENNYGTHRSAHFCTMTGGSEVLPLPTPFHQLSSLLEAQPDSFISGNKEIQDAALRATEHVFNIGSPRLSSVAEPDADQARAAAALAASYTSIQLSSLLSFPQSCYDFTVLVVSYLAPP	NA	NA	NA	No differential expression	Not secreted	NA	NA	NA	NA
Lactarius akahatsu	Lacaka1|MSTRG.9371	2079	195	MEESFKRDVIQEVRSGNGRILLHDEVEERPNVFSIVPLWENVSEEDIMTPGDVFELMEKEGYKVSIFTSAIRGMTVNMFRRLITAVLLLCVRNVVLVASKSDSLQTDEQAPLPGALSQLLERVTSTYDSTGDFIFNCQMGRGRTTTGMITACLIASSMNLERDECVPDVGLEGIVEAYDTIDGPSEEEAYLQGTL	XP_009545553.1	3.6e-51	hypothetical protein HETIRDRAFT_157046 [Heterobasidion irregulare TC 32-1]	No differential expression	Not secreted	NA	NA	PF14566.7	PTPlike_phytase
Lactarius akahatsu	Lacaka1|MSTRG.9704	4932	195	MLLLSHNPILATSSSSLCSSFSVSSSFPSALIVVADLPRPPDTYAKATQWPCLGSRACSGFHCITHPHVDHYQTLSSCQTLSLHSTLLSRNPPSSWLPSNTCKTPSEHALDSAPPLDSEKDSHCRASWCLAPPHCLLSSYAHFLLLRSGKVLSHGRAACAHIPLSVRACATSQFISLRLYHFPHRSLPIALSLYV	NA	NA	NA	No differential expression	Not secreted	NA	NA	NA	NA
Lactarius akahatsu	Lacaka1|MSTRG.9836	3569	195	MFFCSRSLLCYVLQGTLPFVSMRLINAWARNRPALHTAVDDLESFMWVLVWSLVRIFKKAEKITDDSATINLLARAFSSCDSFVILGKGVIVEFWRERVFGDLIQEWLRISSGSHRFLAQVEKSLSASESRNDADLQKRAWDGLEKYCGEVYIKFIRAGYAHLENIRGYGDWGAVIDEYSRFKAVLNNDRVRLVL	XP_007324550.1	9.9e-09	hypothetical protein SERLADRAFT_480600 [Serpula lacrymans var. lacrymans S7.9]	No differential expression	Not secreted	NA	NA	NA	NA
Lactarius akahatsu	Lacaka1|MSTRG.9944	1937	195	MPPKVAPPEAGRGGGDRGDRGGGRGSGRGGGDRGGGRGGGRGGGDRGGGRGGGRGGGRGGGRGGGRGGDRGDFRGGSGDRGGGGGRGRGERGGGRGGGGGGFGNRGRGGVLPAGGPSLSVGHAGPPPLPAAQVEAIGARRPGYGNAGDPIRLYSNHVAVELAQGMIYHYDGTSNLSSILESFSLTLPRPPSRFSW	EJD53575.1	3.2e-07	eukaryotic translation initiation factor 2C [Auricularia subglabra TFB-10046 SS5]	No differential expression	Not secreted	NA	NA	NA	NA
Lactarius akahatsu	Lacaka1|MSTRG.10506	6081	196	MTRSIGNAQSAQAFLNFWKGSRHIRRSRLSRRPHHLVPSTWSHFGPLSVTKKSSLLRITTSKFQFASYIRLISYSTYPLCSIYSVIDPKEAFANRTYRGKVVLITGASRGIGQETAVTYAKAGANVTIVGRSQETLDKTAALIHAAVSGAQVLAVPTDVRDPTATEAAVQATLERFGRLDVLIANAGALSNCNQST	XP_009550138.1	9.9e-25	hypothetical protein HETIRDRAFT_144458 [Heterobasidion irregulare TC 32-1]	No differential expression	Not secreted	NA	NA	PF00106.26,PF13561.7,PF08659.11	adh_short,adh_short_C2,KR
Lactarius akahatsu	Lacaka1|MSTRG.12015	590	196	ACTPVTQDTPPRSRWLTLPDGVTKLPEKMVYKLSYQTKGHSPEGDLLSGSLGQFGIVDIVGSYICTPEDATAEPFVSTAHHVRNSTFWPLSNQSVESSPDNKYLHCTAMALEGLPLLHTSDIEAGVPSPAELLETILHAMIDEKDSSLCLFDFSPFPIAGHYNLFLGGVLHRDVSDGNILRLREPIERPHSRSTSL	NA	NA	NA	No differential expression	Not secreted	NA	NA	NA	NA
Lactarius akahatsu	Lacaka1|MSTRG.12732	590	196	SSAIIQHILSLSDGGRASVAYFYFDFRNENKKHRHNLLPSLLLQFAAHSIPCCNIITHIYSTYGNGMQQPSDEVMINCLTKMLAAMTQHPIYVIVDALDECPNTTGVRSPRERVLSLINDLVNLRLPNLHLCVTSRPEVDIRNRLESLTSHRVSLHDQTGHTEDIAKYIRSEVDFIASDNSWPDDDKELVIETLSE	EMD37971.1	5.4e-39	hypothetical protein CERSUDRAFT_72606 [Gelatoporia subvermispora B]	No differential expression	Not secreted	NA	NA	NA	NA
Lactarius akahatsu	Lacaka1|MSTRG.4283	4392	196	MSEQFLRSSAEVRLRDTTTSSVRLAMCFLRPWFQKHALKDFQGAVDNVAELAYIIARWPGQWWVREHTEIWDLIQSMVHVIGEEVRDAQRVHALNEVTRLQGVVSELQLLTDEYMSVHSRSGSEDSADEAEPPASSSAPVPAPAPLVPPEDPQALPGQAPSTVETASCVLTSFLFGAFAALFVVNSQRRDLALHFT	XP_009550949.1	3.4e-73	hypothetical protein HETIRDRAFT_480101 [Heterobasidion irregulare TC 32-1]	No differential expression	Not secreted	NA	NA	NA	NA
Lactarius akahatsu	Lacaka1|MSTRG.5147	10398	196	MGLFPLKYPLYDPTAGTFTFGVEVGTCSGSRGYVLGLSGSYSHRNQYHRQTRDERTEHKTLGRGGQRTYNVIRDPCVWPYDVAGVTLLIDDADGGGDMSLTKNAADGACARCCLRRKTNKRPAMAAMATTPPATPPAMAPTLDPFPEEVDTGEVDAGADEEVLEVGLTLDEEDVPMSSPGRISGVSEERRSVRRKP	NA	NA	NA	No differential expression	Not secreted	NA	NA	NA	NA
Lactarius akahatsu	Lacaka1|MSTRG.5273	2114	196	MEGGWEGKRARFASKRIWSALISTFTDPTTQHARRSVMQFFQEQLPMRRGHKHKAQQQRHVRADVRSTPEEQLSQEQHQGQQGAQVQALSAALPACGHPRRFHSLATALSTHGDGYRTRSDVHDTSGLVATYNEEHYKSGSSDGADVTQTFAARARVQYYSEHQYLRFQVPRRHARLISIIATLHVIYRIWFNLPT	NA	NA	NA	No differential expression	Not secreted	NA	NA	NA	NA
Lactarius akahatsu	Lacaka1|MSTRG.5300	591	196	GDVNAEGDKGANSLHAVIYGKQETREDGARVAQLLVERGVDVNARRKGRGTPLLLASYYRKPEIVQLLLDHGVEANTEVGDGEKPLHAVSRGKYKTREDGARVARLLLERGVDVNARRKDHCTPLFLASSCGKLEIVQLLLDHGAEAHAEADNGENPLHAASHARYETSEDGVRIVELLLWHGVDVNARHKDRCTS	XP_002152301.1	8.1e-11	ankyrin repeat-containing protein, putative [Talaromyces marneffei ATCC 18224]	No differential expression	Not secreted	NA	NA	PF00023.31,PF12796.8,PF13606.7,PF13637.7,PF13857.7	Ank,Ank_2,Ank_3,Ank_4,Ank_5
Lactarius akahatsu	Lacaka1|MSTRG.7246	4222	196	MFWSHVKGGIDELFDTDKPHFAAWLRLHDVDPSFTHGINPERLEASPLYCVVRIGYCALVDHVLSKRPQDLNAKGGYYRTPLHAAISENDVGTVWLLLENGADVNIRGSENQTPLHDASERGLPDIVRWLLDHSADVEAPENIGSTPLHLSAYSGNSRLPRYFLSTMPRSMQAIKMTESRCMMQPSADILNLCDYC	OCH87556.1	3.3e-12	hypothetical protein OBBRIDRAFT_735932, partial [Obba rivulosa]	No differential expression	Not secreted	NA	NA	PF12796.8,PF13857.7,PF13637.7,PF13606.7,PF00023.31	Ank_2,Ank_5,Ank_4,Ank_3,Ank
Lactarius akahatsu	Lacaka1|MSTRG.8597	2267	196	MHKVTDKYGLRKHCRFHTSLDKAEWDAAANVWRIETRDVRTGETQVTRATAIVSAIGVLVVPKFPKLQGIESFKGEVFHSARWRHDVNLHGKRVGVLGNGSSAYVVLPFEPRKCVTPLLRSQFIPIISKDPTVSVINFARTKMWFIPGVSSLFPQALTSSNLHNTKPLIPYREFTKWIFAHIPLVQRIHRYVIAAQ	KZP31892.1	3.8e-32	FAD/NAD(P)-binding domain-containing protein [Fibularhizoctonia sp. CBS 109695]	No differential expression	Not secreted	NA	NA	PF00743.20,PF13434.7	FMO-like,K_oxygenase
Lactarius akahatsu	Lacaka1|MSTRG.12336	2217	197	MSATRKSIVVVGGGAAGATITRILSSKINASTTSLTLITARPFALHLPACIRLTTTAEGKLEDDVLIPYDNLLVNGNGTIKVGRVTSIEQNKENSGSVILSTGERVHYDILVLAPGSEWDGPLAFPDDRAAVLEHIKSWRRKFENASGIILAWWWCRRMWYVDLPHSVLSLSFMPNFRIRRRDQGRVPTKEGHHCPL	XP_009540286.1	4.8e-43	hypothetical protein HETIRDRAFT_30822 [Heterobasidion irregulare TC 32-1]	No differential expression	Not secreted	NA	NA	NA	NA
Lactarius akahatsu	Lacaka1|MSTRG.9951	2695	197	MELGPSYYNNNQSSVSAFNPNPSDSDIPLQPYDPERDAYGGPSNQHQQWDETGRAIGYSPDPRLHAPRPRPPSFSPSALYASPAAAAAATASQDPEDEWTNARTPKTAPPPDPAPGTYTPHASSPDPASSFPPPPQSPRSARRRTRSPGLSTEAQYVTYHPEHFTGNSAAAAAAQRQDPHSSGPTPPRAFSPPPSYR	XP_007388710.1	8.2e-11	hypothetical protein PUNSTDRAFT_128506 [Punctularia strigosozonata HHB-11173 SS5]	No differential expression	Not secreted	NA	NA	NA	NA
Lactarius akahatsu	Lacaka1|MSTRG.8978	4064	198	MCMALHPDVELSILHFGRLTNMLSCGYLGQTFGPSETKRYLCHILLRFVEDEDDLVISHELLRPEYSYVGLPGSFSIPYSLYSHIRCNSVAEDGTFRIILDYNILHNALRVVPQTLFAPYAGLPRSQAELQNASLAPPIFFIRLDNSVGLPLETAKSADADGPLLRYSDWYPMAGKASIKLRLSVRLLLLVAENIRQL	NA	NA	NA	No differential expression	Not secreted	NA	NA	NA	NA
Lactarius akahatsu	Lacaka1|MSTRG.11992	9930	199	MIKSKSTHSSSRKRKSDENDTPNLMKKAKVSTQVHGVSQPKVTIRLKLGPRPPELEPYPCCLCVSTSRDGLLPIHDKPLVQHPAHADIKVWMAHESCARVLPETWLDEVETGPMLADGTRKREKMVFGVDAIVKDRWNLVSNVRPRGLCQFANQILVQRNVHPVPRIAQRCMARRFNAPEANAPRHFMYPVRAREQNTE	XP_009551312.1	8.2e-35	hypothetical protein HETIRDRAFT_105882 [Heterobasidion irregulare TC 32-1]	No differential expression	Not secreted	NA	NA	NA	NA
Lactarius akahatsu	Lacaka1|MSTRG.1553	3677	199	MLSQSLSRRSNALARPKIARPLRRTFANQLPRPPPKALPPPETFSATARPRQYYSRPHPRDLPPYRVSPAPPISPPPFSLADARPHLQRAWPGLLAACVCGVGAWAAFLAYAANQERLSSSATRRVLSELRDSADVRAVLGDAVRPEPAWYLNGSPWVHGSVRRAPFPLHPHIVCVCVRGKRGTKWGRHGELQKSLWQC	XP_009543094.1	7e-34	hypothetical protein HETIRDRAFT_311446 [Heterobasidion irregulare TC 32-1]	No differential expression	Not secreted	NA	NA	PF08695.11	Coa1
Lactarius akahatsu	Lacaka1|MSTRG.6018	4762	199	MSNRIPPSFPQPFAPAGTPYPARDVAGTPEQRPIDPAQASTYPPDSMFARNTLGTSFDTPYWSQPPYPVQSHGSTPHLMPILNPPPQHPSPHLAPHNPPYQLVQGPIRTPPAFPMPQVQDARVPGSTISSYPPLPTVQTTHVPEYLHNNQVTPGHYSSYPSQVPIMSHSPLQHGSGVFGVAHVTPFVQRNRACVPYSLI	NA	NA	NA	No differential expression	Not secreted	NA	NA	NA	NA
Lactarius akahatsu	Lacaka1|MSTRG.8255	3598	199	MAARACLTIILQLDGSVNKDTIKELPLAFYAARYWVDHAKFGDVSLHTRDAMQRVFDPTEPYFSAWDWLSDHDKSRESISATPPTPRILPLHRAAQYDLGDVAEWLITSRSQDPDELDGRMTPLCHASFSGSPKVVQVLIEHGADVNARHTLDFGPLHIASGNGNLEICVYSLRAVQTSTRALTIGPQSFWPPAKDIWR	OCH92518.1	5.9e-17	hypothetical protein OBBRIDRAFT_426819 [Obba rivulosa]	No differential expression	Not secreted	NA	NA	PF00023.31,PF13637.7,PF13606.7,PF12796.8,PF13857.7	Ank,Ank_4,Ank_3,Ank_2,Ank_5
Lactarius akahatsu	Lacaka1|MSTRG.8728	706	199	GSGRSILLYIVVRRLHPIALTLSASSAILRDIEETRVSGLASMAYYYFDLRDTEKQHLHGLLSPLLSQLGSGSDSRYEILLRLYSTHASGTRKPSARELTHYLKDMLTLPRQSLTYLIVDALDECPNTTGMPSPREKVLGVIEELVNLHLPNLHVCVSGRPEIDIRNILEPSTSLRVSLHDETCQKETFKIFRQKFLHC	OCH90532.1	2.6e-33	hypothetical protein OBBRIDRAFT_592935 [Obba rivulosa]	No differential expression	Not secreted	NA	NA	NA	NA
Lactarius akahatsu	Lacaka1|MSTRG.9639	2089	199	MAKVRGLPRRIKRTASPLERRQPCHPSTSHQRDTGHILIILLLPVTSHLQMATLMAMGNRPINLLIIQFIPGIPPWLSILPIQGRTDPSPPPPGQAHPPPSAEQAIGNQTATLDEENPPAERGKRKKRLVVGDDTSKPVKRAKKTKHIANPVSEVVVATASASPAPLSIDSHDDRGSPVVHNVPISADAEPLPPVIAAA	NA	NA	NA	No differential expression	Not secreted	NA	NA	NA	NA
Lactarius akahatsu	Lacaka1|MSTRG.9949	1258	199	RPSLFILLFSSSIIYELMFLREAGLALVAYFFFDFRDLNKQRRHEFLSSLLCQLSASSYLCSEVLFNLYSSHDEGARLPSDDSLTRCLLDMLQVQGQPEIYIIVDALDECPNDSGMLTPRNSMLDFLKALVDLRLPNVHICVASRPEVDIQDVLEHLVTFSVSLHDQSGQKKDILSYINAFVCAASDSGTAIEKMEGPG	EMD33427.1	1.4e-31	hypothetical protein CERSUDRAFT_142402, partial [Gelatoporia subvermispora B]	No differential expression	Not secreted	NA	NA	NA	NA
Lactarius akahatsu	Lacaka1|MSTRG.6441	5499	200	MRTLSLPRRLLRRAVASLALRTACVVPTLPTPSSLSHEGRLLPLLSPSHLTCRRPTLPSHFLLLDRSPSPLLFFPLSPTSHPSTSLAVLSPPYAFFLFLLPSQCHSLPLLASVSLLTCHLTAPHLHNHSPLSLNTLPLPLPLLPSTLSDISVSLTLSTSPYLHALAFSFPSSQDPQHSLAAPLALSAPSSSPSRPLATHS	NA	NA	NA	No differential expression	Not secreted	NA	NA	NA	NA
Lactarius akahatsu	Lacaka1|MSTRG.10033	4134	201	MSLSWRPLTRSTCCFSGGPLRLRAPSNFRPLSTAASGGSSAQGSAASSTRTALTLALGGAFLGLGGYYIGARSNGVNMEGATSRALVSPSPLPAKPIYGTPGDFVRAIDELRASLAGEAVTTARDQLEAHGFSTNSHHHGTPALLFFSSRVRPAVSGLPHSVVVYPTSTEDVVKIVNVAQKYRIPVVPYSGGTSLEGHFTG	PPQ85493.1	1.4e-21	hypothetical protein CVT25_006573 [Psilocybe cyanescens]	No differential expression	Not secreted	NA	NA	PF01565.24	FAD_binding_4
Lactarius akahatsu	Lacaka1|MSTRG.10238	604	201	LIPATASLPLKALEQRLSQRPRRDRTSGRNNRPTYKNGMATQHRSKNTVGPKSPPSTAAREYKQPLERSPARANIAQNLSHDNPIPASIPLNPTSARPTKKPVGNIPPNPKTQACAVPVVAVPVAVPATAVERDPSVVAAQLDSGSSPFLAQPVTSQQMTARSSPVPLQNTPLSQPSPPRALYDQLSHPRHLYSPSDELVV	NA	NA	NA	No differential expression	Not secreted	NA	NA	NA	NA
Lactarius akahatsu	Lacaka1|MSTRG.10637	605	201	STVIIRDIKSLADAGSAFLAYFYFDFKDKAKQDTRALLSSLLVQLSDQSDIFCDALFSLYSAHKRGSEQPTNDSLSQCLKYMLTTSGPVPVYLILDALDECPYGSGLPSPREKLLDLLNDLVKLRHQALRLCVTSRPEFDIRTALQPLATQQVSLHDESGQALDIKIYVTDIVLSDRRMRRWRDEEKDMVIENLAEKADGM	OCH92518.1	2.3e-40	hypothetical protein OBBRIDRAFT_426819 [Obba rivulosa]	No differential expression	Not secreted	NA	NA	NA	NA
Lactarius akahatsu	Lacaka1|MSTRG.12148	4226	201	MQQLFDPSKPHFTTWVRLHDVEHPVWRSDPITEHMATPLYYAALCGFHRLVEHLLIADPQHVNAYGGCRGAALHTASARNHVEVAQVLLERGGDVDVRGAFQRSPLHFAAIERCLDMGRLLLDHGAGVDSPQVDLRTPLHHATWNGYADVSQMLLEHKANINSQGNDGRVPLHRVSENSNEKGDYSGVVTGARRRCGRKGQ	OCH94796.1	3.9e-16	hypothetical protein OBBRIDRAFT_746651, partial [Obba rivulosa]	No differential expression	Not secreted	NA	NA	PF12796.8,PF13857.7,PF13637.7,PF00023.31,PF13606.7	Ank_2,Ank_5,Ank_4,Ank,Ank_3
Lactarius akahatsu	Lacaka1|MSTRG.3254	606	201	SAVLKHAMSLCDAGKASLAFFYFDFLDKEKKQDLRNFVASLLVQLSAYSTPCCKIISRIYSTHGKGTRQPSDDTLTDCLRKMLLVAVQQSIYIIVDALDECPNASGIPTPREAVLDLLEDLVRMGLPELHICITSRPEFDIKRVLELLPHDAVSLHDEDGQKKDISNYVTGVVYADRNMRSWRDEDKMLVVNELSNRADGM	OCH90532.1	2.4e-42	hypothetical protein OBBRIDRAFT_592935 [Obba rivulosa]	No differential expression	Not secreted	NA	NA	PF05729.13	NACHT
Lactarius akahatsu	Lacaka1|MSTRG.3652	1307	201	LCSTRRLMHFNDNMPAVLDSLSVGALWLGKLSGASGAAAPRYKGLLRDARIDSTVLSRCSQRIHPGTGKLSPYNTLRPGRESQHRFQRRAPLLALELRGDGQQTCGGTDSVVDIKGHKPSSRWLVPSQFDSCCFQDTFWDRARARRARRHGHHVSLLRHLDSSTIPSVSASDILFPIHMTRRYVSIATEVRQAKPGRFTAA	NA	NA	NA	No differential expression	Not secreted	NA	NA	NA	NA
Lactarius akahatsu	Lacaka1|MSTRG.6472	3952	201	MQQLFDPSKPHFTTWVRLHDVEHPVWRSDPITEHMATPLYYAALCGFHRLVEHLLITDPQHVNAYGGCRGAALHTASARNHVEVAQVLLERGGDVDVRGAFQRSPLHFAAIERCLDMGRLLLDHGAGVDSPQVDLRTPLHHATWNGYADVSQMLLEHKANINSQGNDGRVPLHRVSENSNEKGDYSGVVTGARRRCGRKGQ	OCH94796.1	7.8e-17	hypothetical protein OBBRIDRAFT_746651, partial [Obba rivulosa]	No differential expression	Not secreted	NA	NA	PF12796.8,PF13857.7,PF13637.7,PF00023.31,PF13606.7	Ank_2,Ank_5,Ank_4,Ank,Ank_3
Lactarius akahatsu	Lacaka1|MSTRG.7243	4364	201	MAGVASVMCSYNLVNGLYACENNSTLNSLLKSEFGFKGFVMSDWYATHSTTSALYGLDMTMPGDITQASGTTYFGANLVAAVKNGTIPEARVDDMATRILASWFFVGQTNFTQPNFNANEPLDAATNQHVNVQADHGTLVRKIAAASMILLKNADNTLPLKKPRRLVLIGSDAAPAHIAGPNGFTDQGGVDGVLAMGWGSG	KLO18715.1	5.1e-69	beta-glucosidase [Schizopora paradoxa]	Induced during mycorrhization	Not secreted	NA	NA	PF00933.22	Glyco_hydro_3
Lactarius akahatsu	Lacaka1|MSTRG.10649	4028	202	MGTTFASTTPRALAGVGRSSSGTYPDVLKVRAPPRLPQTSSLNPTCTTPRRVSREDDPHPHGGGRRSRGERRAPAPTRVRNSDHPQRSHFGKPAQAHSDEALAWLKEQVHGQRIKCQLFQRDQYGRIVALPLLPLLPRRWWWPRLGGTRNLPLEMVRAGWGVVYTGKGAQYGGWGQDVYLAAQAEAQYVFVICSCLLSLTGF	KLO18158.1	1.2e-20	nuclease [Schizopora paradoxa]	No differential expression	Not secreted	NA	NA	PF00565.18	SNase
Lactarius akahatsu	Lacaka1|MSTRG.2152	1950	202	AVIKDIKNLHKAGLAHMAYFYFDFRDVAKQSRRDLLRSLLTQLSARSDPFCDILSRLYKEHDDGTRQPTDSALMRCLKEMLTLPNQSPVYLIMDALDECPDTSGIPSSRGQVLDLVKELVDLPISSLRICVTSRPEVDIRFAIERLPLCSVSLHNESGQEKDITDYIKYVVYSPSNTIMGRRWRVEQKDMVVQTLSERADGM	OCH90532.1	9.8e-44	hypothetical protein OBBRIDRAFT_592935 [Obba rivulosa]	No differential expression	Not secreted	NA	NA	NA	NA
Lactarius akahatsu	Lacaka1|MSTRG.8251	5650	202	MEEIYLFSLPVKEYQIVDFFLPSLKDEVMKIMPVQKQTRAGQRTRFKAFVAIGDSDGHVGLGVKCAKEVATAIRGAIILAKLSVVPVRRGYWGANLGAPHTVPSKVSGKVGSVMCRLIPAPRGTGIVAAPASKRLLQLAGVSDCYTQSKGSTATMGNFLKATFAAVCAITHRLECLLTITNRTDNKDIRLPYTRSLARDPPI	XP_007366828.1	1.3e-83	40S ribosomal protein S2 [Dichomitus squalens LYAD-421 SS1]	No differential expression	Not secreted	NA	NA	PF00333.21,PF03719.16	Ribosomal_S5,Ribosomal_S5_C
Lactarius akahatsu	Lacaka1|MSTRG.9352	5330	202	MIRVWNCTTGQTVVGGFTGPESRLESVAFSPDGQPTIVSGSSDGTICVRNATTGEIEAGPFIGHMSQIRIVAFSPDGQRVVSGSDDGSIRAWSVTTGETAGQIDSVESVAPSPDGQCVVSSGIHILNATTGNTRQVVFTDQAVIDEEGWIRGSEGKLIMWIPQPHRANLHRLSNIWVGGQNDTRLDLSAFVHGPSWTSCIDS	KIM45626.1	5.1e-16	hypothetical protein M413DRAFT_344802 [Hebeloma cylindrosporum h7]	No differential expression	Not secreted	NA	NA	PF00400.33,PF12894.8	WD40,ANAPC4_WD40
Lactarius akahatsu	Lacaka1|MSTRG.1002	609	203	LSGEDQDGLLPPSSPPIIQPSSPLTVLDRSEDDPPTMRASSGSPLSSPPESPTPAPHSLVFSLAPGLVLNNRCLEAGGSEDSFIPSSPIRSRDDMRRKAQKKRDEERDARAKQAREQEQQSRTIAFKECLDILSANKLTFAELTEYVFFHENQTPDWRYENFFINRGLVTRLLDFFVSSKVNKTCQEDVRDWAESMVLQTIKK	OJT13438.1	3e-08	hypothetical protein TRAPUB_10009 [Trametes pubescens]	No differential expression	Not secreted	NA	NA	NA	NA
Lactarius akahatsu	Lacaka1|MSTRG.10702	612	203	SSAIVQHLITLRDAGSASVAYFYFDFRDVDKKNCRNLVSSLLVQLSSRSGPCLDVLSRVYSTYNDGKERPSERSLVKCLKDMLMALSAPQLPTYIILDALDECPNTSGIPTPRGHVLGLVTDLVDLRLPNLHICITSRPESDIWTALKPLTSGHFSLHDQAGQKKDICEYVSSVVQSDPQMKRWRENDRKLVIDKLSEKADGM	OCH90532.1	7.1e-50	hypothetical protein OBBRIDRAFT_592935 [Obba rivulosa]	No differential expression	Not secreted	NA	NA	NA	NA
Lactarius akahatsu	Lacaka1|MSTRG.2945	11656	203	MSKSDSVPVAIDTALLVPTSAVRSFPSSCSPTLTHCLSSPPSSSLPSRLYTSSCYCTQGKGDYMPGTVPQNVPDAVVKDGTLSADVLNAGAKVGTGLDDQEANDRDQIKSFRVLADFSKDRQQDIWQIHFAMDVRCEASTPLLVATAVPTRSRSFSATSRVRASHPRSPPVTASFSSSPPREFPSQATSTSKSVIVRSPPFQS	NA	NA	NA	No differential expression	Not secreted	NA	NA	NA	NA
Lactarius akahatsu	Lacaka1|MSTRG.3517	2864	203	MENIDWKSSLQAIIRARTVLKDPSKCRPGERETILRTLIAMLRGAAPAPSCEKTLSENLVWLVVKLRDGTLLNDGSLPLSQTEAQLRAYLLVHLGLTPSDARSIDKAAARAFVYDLRNYCFEGSFGPYFPDGSGSVNWVHLHAIHRVVAMHLIDLRETELFVFPLIPMNMPYCQSIIPPGLDFKKTHDWAGHRGSVALFVLLY	KZT19986.1	8.6e-48	hypothetical protein NEOLEDRAFT_1182915 [Neolentinus lepideus HHB14362 ss-1]	No differential expression	Not secreted	NA	NA	NA	NA
Lactarius akahatsu	Lacaka1|MSTRG.5161	609	203	RGGATTEQTKVPGGDPGTVLSSRDQVVTPSFLRTFYKTSRYVPLAADRNVLGVAGYLGDQPSPDDLRHFMNQYRFDATSAAYSVMQIVDGVYDPSNPTIEADLNIQYTSAIAYPTPRIFYSTGKSDSQGDEFINWLNYVLGLWSVPQTISTPYGVPEYEVSPDYATYVCNLFAQLGARGVSVLFSSGNDGVGSGNCLLQDSSG	XP_007864796.1	1.4e-45	subtilisin-like protein [Gloeophyllum trabeum ATCC 11539]	No differential expression	Not secreted	NA	NA	NA	NA
Lactarius akahatsu	Lacaka1|MSTRG.7146	676	204	MLFLQPERIQGAQYTVKSDVWSLGISLIELALGRFPFSESASDDDSDLSDFEGTLSPARPVPLEKKKDKNKESKRNRRKSRGVSLQGGGMTMSILELLQHIVNEPAPKLISDGRFPKMAEDFVNSCLLKDPDQRQTPKDLLVRVTPPALNELALARVNAARALILFLFLHFPRITNGSYTRRRQTLISRRGQAHFDRTDADRYQ	XP_009546503.1	4.3e-55	MAPKK-like protein [Heterobasidion irregulare TC 32-1]	No differential expression	Not secreted	NA	NA	PF00069.26,PF07714.18	Pkinase,PK_Tyr_Ser-Thr
Lactarius akahatsu	Lacaka1|MSTRG.10052	3234	205	MNGSDVNARDASHKTPLHLVSESLSESKEDVAQTLIRNGADVNTRDASRSTPLHLAAMSSNVDIVKTLIKNGADVNARDASHKTPLHLAASSSFSSQGYVTQTLILNGSDVNARDASRSTPLHLASMSSNGDIVMTLIQHGADVNAWDASHSTPLHLASLFSSKVDVVQTLILNGRMSTHGTGATTRLCTWRRRRFPRKLMSCRH	NA	NA	NA	No differential expression	Not secreted	NA	NA	PF12796.8,PF13637.7,PF00023.31,PF13606.7,PF13857.7	Ank_2,Ank_4,Ank,Ank_3,Ank_5
Lactarius akahatsu	Lacaka1|MSTRG.6445	924	205	MLGKVTRAMALIAGVTASRARQPAPFSRILLLDMLPEHWVSHAQVGSVSSHVMGRMKTLFNSDKPHFAAWVQIHDIDRSLYRYSSSKTAKPLYYSALCGFCDLIEHLAKKHSQHVNDFGGELGYPLVAAMNGGHIRAARLLFQLGANVDVRGTEETDSTAHFTSIFLPFGSRCGAVSPSTRCGCKCTAGGPLHSTTSGSRLGGFR	OCH94796.1	1.2e-20	hypothetical protein OBBRIDRAFT_746651, partial [Obba rivulosa]	No differential expression	Not secreted	NA	NA	NA	NA
Lactarius akahatsu	Lacaka1|MSTRG.8453	3286	205	MGPHVLLLREPSPPPETDRYEAALSRASFRPHSLPVLETVLENLESLSRIFRGSDDQCTVDGVIVTSARAVDACARAGVDIDWGKVRFYAVGPATAAQLARLPHPPRDVRGTESGTAERLAHYIVQDAKRGEKLLYLTGDKNRDTLPRVVQGGLGGEEVLQELRVYATRGVENIEHKLACALEDAAGKFVRCLATNVNDARVDLR	XP_009548356.1	1.1e-31	hypothetical protein HETIRDRAFT_322098 [Heterobasidion irregulare TC 32-1]	No differential expression	Not secreted	NA	NA	PF02602.16	HEM4
Lactarius akahatsu	Lacaka1|MSTRG.8763	3791	205	ARVQLRHPWNDRSVVMHCILFFGTHPHLCRVQQGTLPFMSTRLLDAWDLGEPALHTAVDDLESFLWVLIWSLVYIFKKFATMTNLDSIIHRLGHALSSRKFLEIIRKESIADRWTDKVFGDLIRDWLRIPVTSRTDVRELQETSLGLVNDGDTSDAQKRIFDELDERCGKAYKEFIQSGYNHLQTIGRFSNWRDVVDCNGELLNK	XP_009549208.1	2.3e-08	hypothetical protein HETIRDRAFT_323672 [Heterobasidion irregulare TC 32-1]	No differential expression	Not secreted	NA	NA	PF17667.2	Pkinase_fungal
Lactarius akahatsu	Lacaka1|MSTRG.9574	3164	205	MNVFFNFRQPAPIVTPVVLLLIAHPLGKFLAYSLPITIYRLPRVLGGGQFSLNPCPWNIKEHALVFIMTNVSVGPAYALNAIVVAEVYYQLHLGFWFSLVLLLATQLTGFGLAGLCRRFLVWPASMVWPQNLMTCTLLNTFMPKRTRTQGSVAFVTLCLSLPAPSFSSSSPVTSSRPSPCFPGFVGLPRTTSHSIKFSASPRAWA	XP_009553277.1	9.9e-60	oligopeptide transporter [Heterobasidion irregulare TC 32-1]	No differential expression	Not secreted	NA	NA	PF03169.16	OPT
Lactarius akahatsu	Lacaka1|MSTRG.4300	2574	206	MMLGRSAGFAGQMFDISSLFPGSEFSQIQNDAHTDWVNQPGPSTDPFDSTFAQQVQDKYKIPLSGQHYFAESSGGAIRPVFDFRNSGPTGNPDAIVVADVTGHITAPTGHPDSDWQAMKGVSGKFASTIFRVSTKGGEQILTSAVSTFRPIYKDGATECGPSSASPTLPVIRPSLLHSFVSVQSLVQKWTLTSLHVNLSPLRRFLW	KDQ31883.1	8.3e-14	hypothetical protein PLEOSDRAFT_1100408 [Pleurotus ostreatus PC15]	No differential expression	Not secreted	NA	NA	NA	NA
Lactarius akahatsu	Lacaka1|MSTRG.5169	1645	206	RIVASLRDLRFLVQDTDYKSELDHFLAEDFWADVIGPRVLLPAANLESLSMSCNLEFGSLFRLNLRSITFPCLTSLSLSNFVWDDVRCDPQVVVPEAEDFIVRHGKTLKKLELHNCAICVPQDRPRPVRSWAAVWNRFANELSELVDLVVEFNFSQQYVYFFPLCGFDSDEAFFLLRGTEQDSPALQGLFTVVEGRKGLTSRDDAQ	XP_009551656.1	1.9e-10	hypothetical protein HETIRDRAFT_328021 [Heterobasidion irregulare TC 32-1]	No differential expression	Not secreted	NA	NA	NA	NA
Lactarius akahatsu	Lacaka1|MSTRG.10656	3400	207	MPTSSRSTRVPLEVLSDAVLEEIKTRCSFVGESLDGALGPGIVSPSDEDPMDLDLPPSDTAPSESEFSRVSADRDSNAGPTSSDFSVVSQAQILPGRSSRDEHQLQALANLYMRHSTATNLHLKVTPPASQQAGTGQGTLIIPGWIRERGSELLFEGGDVDEGSIAETILDCLLKAPLFSLPRRPKLTSSSRRYQLTFVKHLPLPFL	XP_009545654.1	4.8e-54	hypothetical protein HETIRDRAFT_127391 [Heterobasidion irregulare TC 32-1]	No differential expression	Not secreted	NA	NA	NA	NA
Lactarius akahatsu	Lacaka1|MSTRG.11475	2033	207	RFYYISPSSASPLPTFGADYYISHFSEFLRSGRYSTVTQAVRRSGQRWEAADPQLLFDVAREMSFWRNAGWGPNSPEDIGRRRTQQRGPMNVVSVLRHRVISGISGLGNMPNYRVIFYYYYADVDLAPRINAWTANVQIRPLMDGFGIFRLSFFFFSSLRRLAYVPAASLTADKVSYDTYNEDYRNASYKYRHRTNLSRPSGSIART	NA	NA	NA	No differential expression	Not secreted	NA	NA	NA	NA
Lactarius akahatsu	Lacaka1|MSTRG.5146	1011	207	LRAPIVQITTNFTTTGTSSKSHTGAVVAGVTGGVAALLAIGTIALVVWRRRSRWRQSHKRESAGGASLGSVTNPSPQITVTPFSLMGQTLTGVAPLDAGSQTEQQVDGPSPTEGSPLLLPRGLPVPVGLSSKELARLRSRSPPTDGRSPNLSQVIITHRGAATPPSSGEDQGLHWQSEVASLRGEMQQLRTEIFEAPPSYSSEVRPS	NA	NA	NA	No differential expression	Not secreted	NA	NA	NA	NA
Lactarius akahatsu	Lacaka1|MSTRG.9955	2080	207	MPTSKHFVSFSDEVAEVSSNAPALRLVSPPASSKHGSPPDYYAPNAAFKNRQQNTSVAARRLPEEIYTSTLPSWRAAVRRQCLAVVERESEIIAQWQVRSPFHPSYFALKEEITVPGTDPMARHVLFAHVDARHTYLLSRVSPCIFLLRTRRPRERVRIWSQLTRVFTVLIPFGRLCYALAFGVYMSSYLKDLVCSPRPYAPPVVRL	RDB18722.1	2e-15	Dihydrosphingosine 1-phosphate phosphatase YSR3 [Hypsizygus marmoreus]	No differential expression	Not secreted	NA	NA	NA	NA
Lactarius akahatsu	Lacaka1|MSTRG.3118	2686	208	MGYPFPDGYYFPLNDPPISQEKEVFPSWVTGHYADGDTLETLSLRNALDEPSPTITRMSHEDLASTFHEPPTLLDGSDTVIQKSGVDRGVFSRLREAALFAPQHSEIAWPNVEFRYVCCDRSVWLMPWGIWSFGAEIDQVRKDGKRIRKHSVVRMKGANHCVSITFTFAILISLKYHFKAHWDEPERTLRLLLSDAPSDINVQDVAKL	XP_007309410.1	9.2e-37	alpha/beta-hydrolase [Stereum hirsutum FP-91666 SS1]	No differential expression	Not secreted	NA	NA	NA	NA
Lactarius akahatsu	Lacaka1|MSTRG.50	2567	208	MHLLFTPGTSSRANMLSHLPSFPIWIDYRAASWTKREENLALTAISHRSRVRGIALQRPYKDMAKLLTALSHPFPKLEGLEICPTHSCFGQKLILPTAFLAGSAPCLRQLTLRGVVPRCLSPLLSSATGLVELALTLKVAFGALPEASFMRVCSTCLACVAPTYIWPIPCITSLAHRLLLIQEMFHCRNSRTSPLGAIDYTGRRSWFG	NA	NA	NA	No differential expression	Not secreted	NA	NA	NA	NA
Lactarius akahatsu	Lacaka1|MSTRG.5165	626	208	FSAAVASLISVSIQDIRPNPQDTSNFYLANIYQTLTNPASNTSASLPASPPPFSPPNYAMWVNALLFLSLVISINCALLATLLQQWARRYLKVTQLRYSLHKRAMFRAFFAEGVGGCFLPVEALPTLLHVSLFLFFAGISVFLRNVDLTIFKSVVSWIGIFTALYGCITIFPIFRHDSPYHTPLSLPAWHIVTAVSFVTFRVLQWFTL	RDB28602.1	3.3e-26	hypothetical protein Hypma_015969 [Hypsizygus marmoreus]	No differential expression	Not secreted	NA	NA	NA	NA
Lactarius akahatsu	Lacaka1|MSTRG.7143	4174	208	MPFVLVTNFRVLTSKIVAAFGAELEFGRVLLARLAVALKGYPLAEAPVRADSAHYVPNRSALLIGLGRLEHQAFPLRQVGRDFSENFPVFGILHTSKRHRDSRIVPRFYLLSLLDPRRLFLHKGSHRPLRDTKSRQRSMVNSLRCRGREHLRSASRRLGFTVEICSGPRGLPLFFGVPASFSSLCLSSASRITIAVGFVPLATPLSEG	NA	NA	NA	No differential expression	Not secreted	NA	NA	NA	NA
Lactarius akahatsu	Lacaka1|MSTRG.2395	759	209	SEPCKRKTIACSVKFLSFSAVSIGMSSHDSPAMRCCCPPPRSSSLLPPPVALNLAAHTHSLFLSLPVALFPPSPYATHSVPSYLTGSLRICVNPSVFKTHSCSLIDGIQLPLFPPVRLGSQTQRTLLHFSSYRAFGLSVRVARVHRVLSKEAWEPSELKASHWLMFVAELPSCTGVNSRVRVNVELPTRLRPHRLAATLPPNLTCGVHS	NA	NA	NA	No differential expression	Not secreted	NA	NA	NA	NA
Lactarius akahatsu	Lacaka1|MSTRG.3265	1051	209	MTETHNDLSSAIIKHVMSLRDAGQVSLAFFYFDFRDKDKKQDFRNFITSLLAQLSAYSSPCCKIISQIYSTHGKGAREPSKDALTICLREMLLATAGRPIYIIIDALDECPDSSGMPTSREVVLNLLEEIIRLDLPNLHICVTSRPEIDIKNVLGPLASAVSLHDEIGQMKDISDYVSNVVYADKKMRTWRDEEKKLVVEELSNRADGM	OCH92518.1	1.4e-40	hypothetical protein OBBRIDRAFT_426819 [Obba rivulosa]	No differential expression	Not secreted	NA	NA	PF05729.13	NACHT
Lactarius akahatsu	Lacaka1|MSTRG.5164	2215	209	MASLILKPIRHIYVSLHRDTDSAPTRFSASTPGLDIVLEEPSSYPVCKVAGFAPTIQHDNAAQVSSIAGPDVPSPLHVIESRASESPLDSFHPAHQKPVENLRPSAPSPDTATAGTVRDIITSGAAIPQFTLESSISAPPLSPTSPPAAVALRKNAEPLTPSDPPNLPCPASSNQILSILPTGAPNRCLDSCQRPDPTSHCLSQNPVVR	NA	NA	NA	No differential expression	Not secreted	NA	NA	NA	NA
Lactarius akahatsu	Lacaka1|MSTRG.6547	3048	209	MIHQNPQMDLQAQDRAHRIGQTRPVLIFRLVSRHTIENKILQRASEKRQLEALVIAKGASCSPPGLAFLISHDPSPQGKFKAPIGSNAKTETRQTIAEMAAHLLELEGEHIEVVPSTAAGKRSVISDAELDMLLDRRKEVFEGRGVGWKSGAEAAKGRTNKAANSWGAETPRRQRANADSGLFEVYEAPVDEGNDALAHMLGEDASASL	XP_007305932.1	4.6e-52	hypothetical protein STEHIDRAFT_122727 [Stereum hirsutum FP-91666 SS1]	No differential expression	Not secreted	NA	NA	NA	NA
Lactarius akahatsu	Lacaka1|MSTRG.8098	3237	209	MPIIGLAPSSTPTRPAHFNIEHVIRPNILALHPYRCARDDYSSGVLLDANENAHGHSISPPEGVSPSKKPQLNGDSHIDIDMDLDPILSLDLHRYPDPSHPKIKSLIAEMRGLPSPEHVFLGVGSDEVIDLLVRICVAPGREKILITPPTYGMYPVCAQVNDVGITRVNLELSADDGEGGDKGRFSLRVDEVRLVLVFFRRSLTGAPSR	XP_007308970.1	8.8e-72	histidinol-phosphate aminotransferase, partial [Stereum hirsutum FP-91666 SS1]	No differential expression	Not secreted	NA	NA	PF00155.22	Aminotran_1_2
Lactarius akahatsu	Lacaka1|MSTRG.9460	2642	209	MITGSVHSASAIGAATLAGAPTAVVEATFIIPPSVDIRTLSRYAGFSSDDPLCEPAPSFYRVENLLTLHADAADEFRSLNVWLEATVSKHRFPRPRSLLFYVVSFLLGETQRLFPHCRVARTNIKSSHGTLPPSRRPADRRQWHSRPRIPVCVPFPLCTISACVLHVRAWLTSRALRCTSKRLRGTSRHYLSWRKMDRQQACSQLRFPE	NA	NA	NA	No differential expression	Not secreted	NA	NA	NA	NA
Lactarius akahatsu	Lacaka1|MSTRG.9565	1818	209	VTRRALERNEPDREAYMALITAHFRPEQLVFADESHFNRLTLRRPYAWSMRGERACRFDFFLRGTKYTMLPAISLDGILHLEVVENAITGNIFRQFVEGLLPRMNKWPLPNSVLVVDNAAIHKVAGIRELVEGHGARLLYLPTYSPDLNPIELAFSSIKAWLRANRARINADLESGNGNVYNAFWAAVYSVTADNAKGWYKHCGYQVPP	OJT10703.1	4.5e-60	hypothetical protein TRAPUB_12796 [Trametes pubescens]	No differential expression	Not secreted	NA	NA	PF13358.7	DDE_3
Lactarius akahatsu	Lacaka1|MSTRG.2958	4730	210	MRQVRTLQPTNGPSTACPRACGHYPRHSRAPPRMDGMVVEVLCPSFSVRLLGHLLPPISSSDRTELREDRTGRYDATRGPPRFGLKKVTSLKDASERPFPRSHGRRRTPNPRVSVSASTSATPPTSASAVLAWPRSRGDVADEWRLAWVLSLLPLLGVIAFSLRRQHGLSERSDSGGSAPLYRGVTPIDLLQAPEAPLRAYHTVTPSFVH	NA	NA	NA	No differential expression	Not secreted	NA	NA	NA	NA
Lactarius akahatsu	Lacaka1|MSTRG.3157	827	210	MAQKPASDPNAYGIQTLFTKYPTTIDTLDSFINAAAPLISPEWPAAASESLKHLEEHRDNAHETGQWTEPSQADHGAVVTAIRTQFKAGVELLRGAKTLAIDLASTELGYSAVIRRDGEPVPVATRFYAAATAPGEGEVNPIGREASAVRDLLLCRLDTADIPLPLYDTYVYMAHRLDDTEFGAQVHSEIRGYWGDHVRIVHLSDFSNNC	NA	NA	NA	No differential expression	Not secreted	NA	NA	NA	NA
Lactarius akahatsu	Lacaka1|MSTRG.6609	1571	210	MVLPPLGPRTTSNPPAPGVTVSRPPLKPLSTEGSIIPGETEEDGLLRREYVLVGDTQAVEFNIAVDGTHFMLPKFLILNSDRHAEINAARRRPLLDHRVPLTPAFADDEKRSPDLPHNLPPVSHLSPTFPPPPNPGSVPIPAGRSATNALSRALTLASKKLFGPSVSIPRSPPHFIGYGEGMGSHSPRMRTASMGEVDPVEDELLVRWSS	KDQ51690.1	5.8e-31	hypothetical protein JAAARDRAFT_40928 [Jaapia argillacea MUCL 33604]	No differential expression	Not secreted	NA	NA	NA	NA
Lactarius akahatsu	Lacaka1|MSTRG.2976	5434	211	MDGVHPSLTVGSSTEVIAGEKLIVTAGAIDAHVHYISPTQVIEALSSGTTTMIGGGTGPSAGTNATTCTPSPFYIKHMLAATDTLPMNFAFTGKGNDAGPSALEDIVKAGAAGLKLHEDWGSTPAAIVNALNVGDAHDVQVCCDCIPQRCCALNDTSGKHTHRYSERIWLRREYVSQRQCCPFAHLVIATIAAFGDRTIHTYHTEGAGCTS	KDQ59079.1	1.2e-68	hypothetical protein JAAARDRAFT_33810 [Jaapia argillacea MUCL 33604]	No differential expression	Not secreted	NA	M38	PF01979.21	Amidohydro_1
Lactarius akahatsu	Lacaka1|MSTRG.6587	2249	212	MAGQPILPSLSEIYASRDTTRDGPLALAFATLFEPSYPLFEFLVPTVVATIDGANPGSQTPRRSYNALIDTAIYELEKWPHGQQASFLGGHPRIGEIKGLSALSASEQAAHATPPEVLERLVVLNEEYERRYPGLRYITFVNGRSRKMIMLEMEEKLGIVDDSWVKGDSEEVHEVGSGEWVSEARRALQDIGHIAKSRLAALKVDGDQEVED	XP_007304406.1	7.1e-45	hypothetical protein STEHIDRAFT_147259 [Stereum hirsutum FP-91666 SS1]	No differential expression	Not secreted	NA	NA	PF09349.11	OHCU_decarbox
Lactarius akahatsu	Lacaka1|MSTRG.8704	10144	212	MPVMFLVVYPSYEFLHFSPGQCAETQASQTIPSGTAFGPLRDTLAQEGGELLVSVLRSMLSGTETRTPQSPLAPTTPHAPFITPADSQPDFAQETAEHVVRRHLALAHHKPLTTFLPSAMRAVQIHDPAVFPPGAGDPQTVVGSLPGSAKYHRALRSVLVRCAQGTVLRVPMLKSEFRSLMPASSWWDGVQQHWKDPEGCITFTNPPPDNGG	OCH89234.1	4.5e-31	Formyltransferase [Obba rivulosa]	No differential expression	Not secreted	NA	NA	NA	NA
Lactarius akahatsu	Lacaka1|MSTRG.8707	2931	212	VYTVSRDGAVFVWRAKPSDNSSSDDEDEHLVAPTSQNPLVARIRWGIHQRHYFNQPNTKVVCSTFHRASGLLIVGFSSGVFGLWEMPAFTNVHTLSISQEKISSVAINPSGEWLAFGARKLGQLLVWEWQSESYILKQQGHFLTSIRSHTLPTGSISQREATMAKSSYGTLALVSVSSPSPSILHRYPPSNSLRRARYYSQPRSMGQYEPST	PSR70569.1	1.2e-55	hypothetical protein PHLCEN_2v13540 [Phlebia centrifuga]	No differential expression	Not secreted	NA	NA	NA	NA
Lactarius akahatsu	Lacaka1|MSTRG.10496	1958	213	MFTCHPIEKPYLIFQVGSADPDLAVQAARLVVDDVSGVELNCGCPKPFSTHSGMGAALLTNPDLLCSILTALRRDLPPRISVSAKIRLLPTQQDTLALVERIVNTGVNCLTIHCRTRNMRPRERALVHRLKEIVDFVKGLGRDVAVIENGDCVGYEDARRIRAITGADSVMIATAAEANPTIFSPHPLTNLEDTFILPYLRLVRAVLVHRLNC	XP_007391090.1	5.6e-90	uncharacterized protein PHACADRAFT_248448 [Phanerochaete carnosa HHB-10118-sp]	No differential expression	Not secreted	NA	NA	PF01207.18	Dus
Lactarius akahatsu	Lacaka1|MSTRG.3407	641	213	LPIQRLMSSISSAVIQHFITLRDAGSASVAYFYFDFRDVDKKHRRNLLSSLLIQLSSRSEPCLNILSRLHSNYKADKGQPSERVLVQCLREMLMTLSLSQLPTYIILDALDECPNASGIPTPREQVLGLVKDLVDLHLPNLHVCMTSRPEIDIRTALEPLTFGHLSLHDQPGQKRDIAEYVSAVVQSDAKMKRWREDDRKLVIETLSEKADGM	OCH90532.1	4.1e-48	hypothetical protein OBBRIDRAFT_592935 [Obba rivulosa]	No differential expression	Not secreted	NA	NA	NA	NA
Lactarius akahatsu	Lacaka1|MSTRG.4297	8282	213	MAKSSPMTAILTKTVRRGGHALMRSCCTITYCFGLTGEALYRFLLSQAETPPTFLIHCRGTHKETRSRLVERTDSHGHRRTDTEYDTEIVTDFDFTIEHQVPPRATQWTVGDEEPAYRGRLSKEVGPPGEATKADRATVDSFKAWLAERRSRGLPPWVAKDRLANFPIGAVEQPHRVDVLQSSWTLRQWADDYCQSRKIFKEFVYRKVWSTFF	XP_009541114.1	1.3e-46	hypothetical protein HETIRDRAFT_469032 [Heterobasidion irregulare TC 32-1]	No differential expression	Not secreted	NA	NA	NA	NA
Lactarius akahatsu	Lacaka1|MSTRG.6051	735	213	ATSLSPVPSSSRLRTVPHMLLLSHNPILATSSLSLCSSFSVLSSFPSALIVVADLPRPPDTYAKATQWPCLGSRACSGFHCITHPHVDHYQTLSSCQTLSLHSTLLSRNPPSSWLPSNTCKTPSEHALDSAPPLDSEKDSHCRASWCLAPPHCLLSSYAHFLLLRSGKVLSHGCAACAHIPLSVRACATSRFISLRLYHFPHPSLPIALSLYV	NA	NA	NA	No differential expression	Not secreted	NA	NA	NA	NA
Lactarius akahatsu	Lacaka1|MSTRG.7107	15457	213	MHRSCRARIRLHLDSLSFSLLPPLTAPRRFKQSQNLDIKDTSQSHAFTIYDLVDISMISILDFDMMTFASMFHFRRGRGRPSKAISHISSVPWPRSPNRSPSPASSDICPPSGLGRRASIISELDMACIDSPVSPSFPRMSEMFPSVPTYIVPPSTRSSFQTHPTRARALSSPAFLHSLTESTHAPPPPPPPQRIIVTSPQVFEPRTPRLARQ	NA	NA	NA	No differential expression	Not secreted	NA	NA	NA	NA
Lactarius akahatsu	Lacaka1|MSTRG.2580	2609	214	MLDLGADINFCDSSSRTPLSLASDKDHQEITTLLLQRGADANIWEQGKGTILIKALQREDLGFARRLLMNHGADVNARNDDGLSLLHLATGHKNLGSVRWLFKHGANFPRNIQWAPFPKGDRRVTGAFPGSFYSPFDSFWSPRIIDLAKHVYLPDVEGKIQAASEGPATKRRALIVGISYFYSQPDTWWPLGGPHECVDRFRDLLIGEFFFFQP	XP_017199755.1	3e-06	PREDICTED: LOW QUALITY PROTEIN: ankyrin repeat domain-containing protein 30B [Oryctolagus cuniculus]	No differential expression	Not secreted	NA	C82A	PF13857.7,PF13637.7,PF12796.8,PF00023.31,PF13606.7	Ank_5,Ank_4,Ank_2,Ank,Ank_3
Lactarius akahatsu	Lacaka1|MSTRG.4525	2763	214	MFLVLSKLHSRVLSRLNTVHTRIFVPAEGNDLAQLLLARGVNGESPIKRRSPRKSTAARRTTPKSARSAKVATKTPRTAPKRARKSTVVLDANLADENAALSQPRIVPTSTKKNKRSSTSKSKAQAPKSKAPKSRGQRSRPKTKEVDIDGSGASVTSGHSFIDLNSPSLSPCFFTHHLLYARLSCDGICIGVDAALPLNSTGPSRPHAPTRPRK	NA	NA	NA	No differential expression	Not secreted	NA	NA	NA	NA
Lactarius akahatsu	Lacaka1|MSTRG.6608	1163	214	SRLHRSFFRLRLRYSTLMSQAQSIAPVRSDPPSGSTTPSGTEPNPNSKSAGVSPWIRIIVYFQPSLHCTAKKEAKRLEKEAKLAAKAAKVAAVTPAGEKKAKEKLTKEEEAPFVNTTPKGKKKGAFPVYIQSVDFIYFVDVSGPMASSYNPIAVEAAWYDWWHEQGFFKPELGSDGRTKSEGLFVISAPPPNVTGSLHIGHALTTAIQDGLVRW	XP_012177731.1	4e-43	predicted protein [Fibroporia radiculosa]	No differential expression	Not secreted	NA	NA	PF00133.23	tRNA-synt_1
Lactarius akahatsu	Lacaka1|MSTRG.8987	3115	214	MALFPSDGNAKAPTDIVDISRRYSAGFLIQLKMRLNLHFQVTREPLSLLPPSLPPMDPASLYDEPYELGSPTFMWPWLRDGLAGTPLTGLSSASGQKWVGYYIDEGMDEPPMFFELYLAPPHAADAGGNKLYFRGDGADSVGFFTLEGSSDMQTGVVIARKTYVGAHWWDWRGVITPFGMVGVWGTEAQNLGWWWVWPQEWSERSPAPPTVTVE	XP_007305059.1	8.9e-19	hypothetical protein STEHIDRAFT_169150 [Stereum hirsutum FP-91666 SS1]	No differential expression	Not secreted	NA	NA	NA	NA
Lactarius akahatsu	Lacaka1|MSTRG.5462	1369	215	MAQYSESVEMEQQQSTRMADTFFVQQMYQRNEAGERENSLRLVDLLPLLHETTAELRSAASNALNAIACMISFVNTTRWSWHSTAHALSEQERELDSAAEHLRGALVAFKETERLRLLEPFEPHLGTPAAPLRGLYVCYVFSASIVVVSEAILAVVDIVRQTTDKRRRNRLWAPKGLRQLVHTLFIEKRTEEDLRAYGETQGVKEVVTEDDTGKH	XP_009552576.1	1.9e-32	hypothetical protein HETIRDRAFT_108248 [Heterobasidion irregulare TC 32-1]	No differential expression	Not secreted	NA	NA	NA	NA
Lactarius akahatsu	Lacaka1|MSTRG.5686	4464	215	ADSTLALVKEEPTSENPHPSFVPLRLKVPDANIIVRSSDQVNFRVHKSLLSMSSPFFDDLLSLPQPPDGEVVDGLPVVQLSEDAYLLNSLVSLLYPVPPVIPNSYEKVFALLSACQKYDMISIQTYIREEIKRGRFPGLVTTEAFRAYAIASNMGLIPEMENAARLTLGHPMTFESLGEGLRSFKGRALYDLVRYRVANKKRPPMFEKWLGSLLK	KZT07306.1	3.4e-18	hypothetical protein LAESUDRAFT_758713 [Laetiporus sulphureus 93-53]	Induced during mycorrhization	Not secreted	NA	NA	PF00651.32	BTB
Lactarius akahatsu	Lacaka1|MSTRG.6049	3448	215	MPPDFRHLSPLVSQANLSRLRQACQLDGEIEPAAARDTEPPAPSASSASSLAQQEREFQKAVQPGSPISALLSSARQPLMVAPGGVGVVRGEPTLLRKLQAAKKEAVKSPAKTQKATRLQGITEEGGAGYEMQGEEARTKELQSQKARIVAQMVPAQVPRSTTESPFEDAENVPAPVLETAQGERRVRVRTKEAQAVLGEAAYLRVAEQGLTGCL	CDO68443.1	1.2e-31	hypothetical protein BN946_scf184704.g6 [Trametes cinnabarina]	No differential expression	Not secreted	NA	NA	NA	NA
Lactarius akahatsu	Lacaka1|MSTRG.9806	1194	215	MVLFRDLDWHLRRVLNYTTAQESVTDAQQESTSSLTISFWKYLPSVCATLPSTLLFVWRNGGSWCTFANDGDKSYTHHHAILICIFAAQIGQLPVPGRFSVSGPAFPVAISYQLPDNEDDVIAALKHRDRVCLITLKTMRSQMETIVATMEGSFPVLTHPVLHAILANVPGVLVPSLPGGFLGGSTPCLQQVHLSGIPFPEFPTFLLSSRDLVSL	NA	NA	NA	No differential expression	Not secreted	NA	NA	NA	NA
Lactarius akahatsu	Lacaka1|MSTRG.2112	2948	216	MDEESNTQGPVEMVTVPALGAEWGKDELKDMTKRGRREKEKENLGRKWKAFNRGEYGIFGRKWLTRRTLVFFLFGLCAAYVVPHAHFLFFSYTDFFLSSIGLVLAFTIPRVPGFNINGQTPLVSASGWFNQSVPVEFSRFPANFSFPAAVSLQVDTGSNFLPLVFKHLDAQLYDLDSFHLVGTGHLNHTKLPAKKFSNIQIPVNFTYVATNDSDQT	XP_009545869.1	2.5e-61	hypothetical protein HETIRDRAFT_61294 [Heterobasidion irregulare TC 32-1]	No differential expression	Not secreted	NA	NA	NA	NA
Lactarius akahatsu	Lacaka1|MSTRG.5196	2293	216	MNFRSLPAAHVNLSPSVAGSGKSILWYARHLLSSISCKYISSASSVIIEEIKARRDAGSGLLAYFYFDFRDTKKQDIRGLLSLLLTQLCARSDPCYQILSDLYSTHDAGFQKPDTKALVRCLKDMLELPGQPTIYLVMDALDECPNDSGVVSPREKVLNFIEDPVELHLPNLRICATSRSEADILDVLEPLASYTVCLHDEDGQKQDIADYINSVV	OCH90532.1	2.3e-35	hypothetical protein OBBRIDRAFT_592935 [Obba rivulosa]	No differential expression	Not secreted	NA	NA	PF05729.13	NACHT
Lactarius akahatsu	Lacaka1|MSTRG.11183	655	218	VCCPFPASCRNLFLASPSVIQDIMVVCEAGLATMAYFYFDFKDLSKQTCHDLLLSLVAQLSTRSSPFCDILYHVYKAHDNGTRQPSDDTLKETLKRMLRLPGQSPIFIVLDALDECPDSSGIPSPRDEVLELVKELVDLHLDGLHICATSRPEVDIRAILESLASHSVSLHDESGQKTDIADYVRSVVNSSPSTAMRRWRADDKTLVIETLTEKADGM	OCH90532.1	4.3e-45	hypothetical protein OBBRIDRAFT_592935 [Obba rivulosa]	No differential expression	Not secreted	NA	NA	NA	NA
Lactarius akahatsu	Lacaka1|MSTRG.5676	20420	218	MSAIITEPPAYPLAPGAASASSSSQDLLDLDLRTSSSTPPPAYTERASRKFRITAAPGSGMLNATILDAAGRALYTTSSDAKLKKTTVRRAAVPAPYPDSDLDPGKELARVGWDRSSPRVRFLADVDGTELPKKSKKHKLKCKEWLPRAGADTQYVFLSHFGEADATRRDRSRVLTVHGTRYTITERKGANGYVRSPVPLFSRTDLTRPAAPLFKRRC	NA	NA	NA	No differential expression	Not secreted	NA	NA	NA	NA
Lactarius akahatsu	Lacaka1|MSTRG.5268	3281	219	MAGIPLPAVTPENWNEGNISKPWSQFIDYTIPTCMPIDGDPVLGSTPRWTAVLQPEPTLAPRFARLEPSLPDRLLGALPGFLASPGAFSFTGAPLWTSDIPDNLATCLDYLPKEIGMAGRGYSGMTVTTDVRVTIGGVAFVAVRGLTHAFNLVLDKVTFTNPRQPNSWRNDWSTVCGDYAVLVGQDYSHEVIRDMHGLQSGLVLQSSSTHEGLPAVLVQ	NA	NA	NA	No differential expression	Not secreted	NA	NA	NA	NA
Lactarius akahatsu	Lacaka1|MSTRG.4753	3052	220	MVRALSFISPTILVLTPSCRLTTRWRRVQPAAQRIAPRRAGRHVRLFSPPLTSPHPFSVGTSRMTAGAALCVFTQRQTSEQGQRGFRLSSLGILLARSLCPCPWRHVPALKALVRDLHSDSAAQGDSCQGVWEPAWRFFELRKARLEDLGGAGAWHRWSEELEFDMDNGEVEDSSDRYEVSRDARRELSHQLIRYSSTRTLPRRYASPAFCASWGPPHSR	KIJ67315.1	6.7e-22	hypothetical protein HYDPIDRAFT_148817 [Hydnomerulius pinastri MD-312]	No differential expression	Not secreted	NA	NA	NA	NA
Lactarius akahatsu	Lacaka1|MSTRG.5298	3905	220	MISVEASHFHSRYPDDNCAAVYRSRGGVVQNPQDIFINYLQHNASTNMASYYTNSTAFAVQNGKPFVMFETNTASCSGFPGISNSFGAALWALDWALTMAYSNFTGALFHIGGQNAYYNPFTPPPTDQSTFHQWTVGPVYYSALVMAEVLGPHNTSQVVDLTSNINTPIYAVYENGAPTKVALFNFVTDSTGASTYTATISIGGGTTGQSNATPSQVQVK	XP_009548293.1	1.3e-78	glycoside hydrolase family 79 protein [Heterobasidion irregulare TC 32-1]	No differential expression	Not secreted	NA	NA	PF16862.6	Glyco_hydro_79C
Lactarius akahatsu	Lacaka1|MSTRG.9833	4058	220	MLEKPSAPPFIEEEVSEATLEPLGWRAEGRAQQPVYIRGGVLADQVGYGKTAITLGLVDCTRKQVARELEDATDIPGKIRVKASLVVVPPHLTRQWSTEIQKFVSSEAKMQVVTLTTASNLNSLTVENVIDADIIVVASNLFKSTVYLANLEAIAAGGALPASDGRYFNARLDSALDSLKQQVDVLREEGSVSVMDAIHAARKRGLPAPLSFSSAKLICT	XP_024341226.1	9e-67	hypothetical protein POSPLADRAFT_1045475 [Postia placenta MAD-698-R-SB12]	No differential expression	Not secreted	NA	NA	PF00176.24	SNF2_N
Lactarius akahatsu	Lacaka1|MSTRG.6432	3191	221	MLAYPEVQTRAHAELDEVVGNARPPTFADLPSLPYIRAMVKEALRWSPSVPFGIPHASTEDDWYEGMFIPKGTLCFQNMRTLNFDPEVFGSNATDFDPARYLDEKGQVKALMVSREDGHMSFGFGRRICPGRFFAESTLGIDIATLLWAMRFERPEGAQGELDVRTVVHAGVTAYVTFACSLDGFILTTSSRSCPRPFECKMTARFTEAESLLKDSLNVYE	KZV67267.1	2e-50	cytochrome P450 [Peniophora sp. CONT]	No differential expression	Not secreted	NA	NA	PF00067.23	p450
Lactarius akahatsu	Lacaka1|MSTRG.8677	7279	221	MMGYSCEPPQTKKPQPRQKKTIIVQPLGVRTPLDGFFSRYPKFLFQPSESPVVEFNRLCKTYNWKENNRKKNAAREAFQIAMKKEFDNLYGSDEKDIKNWQKLCYVLRIDPVPDTLWTCRAVSYRFSEPLRLRTKPPSFLQEVLKKHVNLVDLVHGSKEEVRIFQTEEELSKYTKETKKFFPKEDAVDGGVLRALRRHILAPREGTSSSMSKGPGRYLELK	OAX40305.1	3.1e-27	hypothetical protein K503DRAFT_714798 [Rhizopogon vinicolor AM-OR11-026]	No differential expression	Not secreted	NA	NA	NA	NA
Lactarius akahatsu	Lacaka1|MSTRG.9562	1564	221	MACMVALPDGTFMIMNGGQAGVAGFGLGADPNLSALLYDPTQPVGARISILNTTTIPRMYHSEATLLPDGRVLISGSDPETPGLPEELRLEVYIPPYLNQGFTQPVVTVPNKDWSYSGQYQINVQLFQGSTSGMRVSLVAATSSTHGNTMGGRTLFPAFSCSGNTCTVTAPPDAKVSPPGWHQLFILDGPTPSHGVFVRIGGDPGLIGNWPNQAGFHPPGV	KIM63217.1	4.6e-95	glyoxal oxidase [Scleroderma citrinum Foug A]	No differential expression	Not secreted	NA	NA	PF09118.12	DUF1929
Lactarius akahatsu	Lacaka1|MSTRG.2527	668	222	EIDIQSYQRAIGTLMYPMLGMRPDLAYTVAALGRHTACPGNEHQRALNHAFRYLQATSDWKLVFQRGTPNGTVLNGFVDADWASDVNDRKSTSGFVFMLAGGAISWSSKKQSAVALSSTEAEYIAAAHAAKELVWLRRLLLEMGQKIDSPITLSMDNQSAIAIARNPEFHDRSKHIEIRHHFLRQKLDEKELDLAYVPTGDQVADVLTKGLVQEKHDRFADA	OBZ79951.1	4.7e-63	Retrovirus-related Pol polyprotein from transposon TNT 1-94 [Grifola frondosa]	No differential expression	Not secreted	NA	NA	NA	NA
Lactarius akahatsu	Lacaka1|MSTRG.9472	1192	222	MVLKNSKADLWVRNVQLSLFSLAPALVPVLCGPPVPNSHGFFADLLNNFGGWAWATVLIQVFGGLVTAVVIKYSDNILKGFATSLSIILSFLASMILFNFRITPSFLIGSSTVLVATWLYNQPAGREPTILVNVVNSATGSKAGTPWPGSPVEADAPILGQFDKTSSSPRTLSTAIVLEKTDHFPPMVDTPRYLNAPYGSPLPSRTPSPAPVLSSHQPFERR	XP_009541780.1	1e-78	UDP-galactose transporter [Heterobasidion irregulare TC 32-1]	No differential expression	Not secreted	NA	NA	PF04142.16	Nuc_sug_transp
Lactarius akahatsu	Lacaka1|MSTRG.12342	2657	223	MVGARARALRRSPPTFFKFGGWGRRGGSSLLVRADHLFHQLRLTSDVDPILLVLGLTQTIFEGSMYLFVFIWVPTLQESSPYPSSLPLGYIFSAFMVSMMLGSLIYTFVTAHWFRPTPTSALPKHTRSSSVSSLSLQGNSTLALHAQLSALVCAAAAVTFAACVSIGKGKSEQGEHLKFWAFCLFEACVGMYYPVQGMLRGSLIANEHRATVSAFRRGCVSKC	XP_009549624.1	2.2e-52	MFS sugar transporter, partial [Heterobasidion irregulare TC 32-1]	No differential expression	Not secreted	NA	NA	PF05631.15	MFS_5
Lactarius akahatsu	Lacaka1|MSTRG.8106	7295	223	MKSTQLLGLPPATVYFLQPTHMEAVVNAIVSSAKKSLLFPLAWRHKVSGIIEGYITRESLWDRLVFDDARGSVLGEAAPSTRAVIVSGGPVAAKLLTPARVAFSVPLVIAHTHPLVSGPVLASHPHDLQTFAITSDQEPAHVGPPTVNIEVKLVGVDDGAVEKGGDPAGVLHVRGPIVGRVLTLSDNPEEDEAPKNDEPWVSTGDQARVQTNGVFKAWSRTKA	XP_009542314.1	1.8e-62	hypothetical protein HETIRDRAFT_407493 [Heterobasidion irregulare TC 32-1]	No differential expression	Not secreted	NA	NA	PF00501.29	AMP-binding
Lactarius akahatsu	Lacaka1|MSTRG.8690	7161	223	MYYTPRPDELSESAPDIAFLLGEDDAPNPAGEGDDGGEVDKKPVRVLHDWSVFDACPRPKKRGELALHMLPLDALDTPSSGCAPEGAGVAGPLFENDEDAGQEDDGDYDDDGEGEDEAKAVSVRLRLGALLRYTIDYTKSDEYAPLSPLSPTRRSSVAAQYSLRPPRRGTSSEYPRENIARTMGRSSARTRSHRRSCVRLSAIPTCRSRHLSASSKRASARWR	OSC99059.1	3.9e-09	S-adenosyl-L-methionine-dependent methyltransferase [Trametes coccinea BRFM310]	No differential expression	Not secreted	NA	NA	NA	NA
Lactarius akahatsu	Lacaka1|MSTRG.9852	3444	223	MREKAHRALAAVRTSSSHPQPDGVKQEEIEDDFVVFAGRRRVFRPGGNATPSQQAAPTPQDPLPHDEHTGESLIGVGEWLARQEEYVGYDPHYVTAIDPPPSAPHDQHQQHQHHHQQRQYGYAPEQPQYTLEAVPPPHYMAAPYAAYAPPPHPPHQLLHPHNLHPSSHTPGMGQPSHGLHADELEDMRRDYTVTVRAPPAELAQLGFAANGSRMSETWVSFMQ	NA	NA	NA	No differential expression	Not secreted	NA	NA	NA	NA
Lactarius akahatsu	Lacaka1|MSTRG.1351	4028	224	MTRADDLHQNNTCPFCEYSASSGDRSGAAERRRQNTDLVDRFQASIHVRTTTSLLVLRGSVPESARGGIDSTYYMHYTAEANRGLGSLGWNKYVECFPISPQLSSHATAPQGVLGRPLLRRQREGLHKPPRLPRRHPTDEQHRQDPGPAYTTCQSRHRTCPPSVRAAVSSLSRQASTPALPPPLRHRLSTSLRELGPCRDLAPVLRRRRLAHPVAAATARQAPG	NA	NA	NA	No differential expression	Not secreted	NA	NA	NA	NA
Lactarius akahatsu	Lacaka1|MSTRG.3002	2526	224	MQERPTVTSSGARAPQLPALHIPEPFRGPQTAQSYKSAWSTFSPVFRTPLTEIPPSLTPPSTPGPRKPSAAAPPSPAKLTAISQDSAVAVLSSLSLTMTTLTPPQALLAVVPQRPEIPLQKPASAGLLSSGALTPGGRASSPQSTTLSSSTNDLARSSGLHAGDSHVVNRTSMTVSVPGTTKDQATSPGPQQARSAAAPVKGPAQTQKKKNWFQKFIWDYDTGK	NA	NA	NA	No differential expression	Not secreted	NA	NA	NA	NA
Lactarius akahatsu	Lacaka1|MSTRG.6892	1870	224	MQERPTVTSSGARAPQLPALHIPEPFRGPQTAQSYKSAWSTFSPVFRTPLTEIPPSLTPPSTPGPRKPSAAAPPSPAKLTAISQDSAVAVLSSLSLTMTTLTPPQALLAVVPQRPEIPLQKPASAGLLSSGALTPGGRASSPQSTTLSSSTNDLARSSGLHAGDSHVVNRTSMTVSVPGTTKDQATSPGPQQARSAAAPVKGPAQTQKKKNWFQKFIWDYDTGK	NA	NA	NA	No differential expression	Not secreted	NA	NA	NA	NA
Lactarius akahatsu	Lacaka1|MSTRG.6937	2019	225	MGQRLHSSLRMYHDHAHLPSRQPILYSAYIIGWSVVVGIPYVFYVALQWFTSSVYLSDGDWDQFGGLEESYRKLLLQGMQKMTEETALNSPSGGGGLIPARSCGHSTAWMKTAFFFGLPGFRSSKVIDDPLPNLPKEQKWKFFTGLMGLLDRTFSSDLLPPPVKRRRAMICAKAIDSAHIPAAFYCLDRILTYYQDSGLLVAGIVRIVRGWGSGLRARLQSLKPA	NA	NA	NA	No differential expression	Not secreted	NA	NA	NA	NA
Lactarius akahatsu	Lacaka1|MSTRG.9575	1741	225	MSLVRDYVNFGPPFDDSDADIILRSGFTSVLAPGSTENSVVATDFLVHKLFLIRASSVFKSLLTPSSETLDQQKVEALKHGIKHDIQGNLPVLCLPEDRDTVHRLLTAIYPIDIVYPQTLETIIKTFAATRKYGMPSVLARFRTHCSRAAPVATAESAFRAYVFASNEGLKEEALEAAQWTLSPTQTFDSYGSSLCSASGPALLALLEVPRNGCTGDKTAESTCV	XP_007302580.1	5.3e-14	hypothetical protein STEHIDRAFT_138386, partial [Stereum hirsutum FP-91666 SS1]	No differential expression	Not secreted	NA	NA	NA	NA
Lactarius akahatsu	Lacaka1|MSTRG.11191	680	226	GLWEERHMVCFPCFPVGAYFFASSSIIRDIMAVCEAGPAIMACFYFDIKDLNKQTCHDLLLSLVSQLSTHSSRCCDILHRVYKTHENGTRQPSDDTLKECLKEMLRLPGQGPIFIILDALDECPDSSGGIPSPRDEVLGLVNELVDLHLQGLHICATSRPEVDIRVILEPLAFRSVSLHNESGQKTDIADYVRNVVDLSPSIPMRRWREEDKNLVIETLTERADGM	OCH92518.1	2.7e-42	hypothetical protein OBBRIDRAFT_426819 [Obba rivulosa]	No differential expression	Not secreted	NA	NA	NA	NA
Lactarius akahatsu	Lacaka1|MSTRG.11253	6080	226	MHNTVHTAPTAARVCVFCCCCSAPSRADARLPRDIANMQARRDAARRPGAQPRACARHARVIHHRARAERGRRRADARRVAGGPARGASLRRDRALGRVGAPEGGLERGREAGLDLARELAHEHGAVLAPERGDRLVYAVALDEERAVRVDVADRAEDAEQVQLDDRLAVAQLLRDAPEELRFGDADRDGRRVAADLEERIEQVLEGARFGGDETLEERVERLGLR	NA	NA	NA	No differential expression	Not secreted	NA	NA	NA	NA
Lactarius akahatsu	Lacaka1|MSTRG.6711	14163	226	MDDMFARIRNEIGAMERRSQDFKKMVNELVGLVDEMQERERIGGFANGLARGPRIPQARARAGLVHSSSDTPILANSRARLPPPPLPGAAGGSPPRQLSSRPTRSSPLRHTTAETRPIPRSPRNGGSSTIAPRFSPPPRPARNPQRRLFNRVFYISHSSSVPLSRIPPRVPSPSSTPVTPPTSGSRESPQSRSISETRTRLPPPLEVSPVPYRPPGQRLFSFLDRL	NA	NA	NA	No differential expression	Not secreted	NA	NA	NA	NA
Lactarius akahatsu	Lacaka1|MSTRG.8678	2823	226	MFVDPVSDALVGCNSYGRPQTKKPPPSQKNIIIRPLGVETPLEGFFSQFSNFQSQPSNSPVVEFDRLCKTYQWERNDPEREAAREEFQYAMKREFDDLYGTNEKDIENWHKLCYVLRIDPAPDTLQECRTVSHRFSKPPCLRMNSSSFVQEVLKKHVNLVDLVHGSKEEVRIFETETELSKYTKKTKKFFPIQDARDGGVLRALRRHILAPRDGIRSSRRKKGSRT	KDQ24830.1	1.7e-28	hypothetical protein PLEOSDRAFT_1090472 [Pleurotus ostreatus PC15]	No differential expression	Not secreted	NA	NA	NA	NA
Lactarius akahatsu	Lacaka1|MSTRG.2931	2511	227	MPSYPASASQFLGQTIDSGALRIEAILGAGAFGVVYRAIDIQTGALYAVKRVEKDGNEYYQARERQLHSHVSSHPNVLTFHREIHEGRYAFYVYDLCAGDLHSVIKEAMFFREDELIKRVFIQIIDALEYCHKHGVYHRDLKPENILVSALGGDMDVFVADFGLATTSKMTASACGTPCFMSPGMYSSAFSHPFPVEPLFQSHWWLTTIPTLLCKETFGHSVAFSPR	XP_018990399.1	1.4e-35	hypothetical protein L202_06972 [Cryptococcus amylolentus CBS 6039]	No differential expression	Not secreted	NA	NA	PF00069.26,PF07714.18	Pkinase,PK_Tyr_Ser-Thr
Lactarius akahatsu	Lacaka1|MSTRG.3670	2986	228	MSTPPPNESTHHTFHIPPVISVPTTPLGAVQTMISLLSPPATAQGALPPHATPASPAEISPDVPVHASAPPAPPPPPAPPKHIATDPADPALPSVSSHGARASTPPRGTARVTRSYPALPELSHPPPRPVPLPGADGRRLTAHYADSETAWHTRDDVDPVRSPITAYYVPAWPAADSSVGASSLDQTREKTVALRLKSTIDSATEERDKAAQKGEKRHVFTRCEPWNL	NA	NA	NA	No differential expression	Not secreted	NA	NA	NA	NA
Lactarius akahatsu	Lacaka1|MSTRG.8676	1743	228	MTGTSSKSHIIRGVLGGVAALLAIVAISMIVWRRRRQSHGRTSIGSPFEASGEVMSHGTQVTLTPSNPTRSALALPEVAPVDTRPQADSQARLVHRSSSLEDALLPLRRVVSVPVGLSSKELARLRRSPANGSRSQSMDGRPSNPPLTPTADRGALRDAAAAATPSPEARVPRSEFDVLRHEIQRLHVVISESPPSYASGALQSSSFHRLSDNIRFFLFSSFSSNTRS	NA	NA	NA	No differential expression	Not secreted	NA	NA	NA	NA
Lactarius akahatsu	Lacaka1|MSTRG.10461	1957	229	MLRWLPHAEQPSHVDAAPLRTATHIFDRLREGRHGLCGDPAALLGDAPVSRSTRRMAQRRHAALLRRQRAIIARSTCGYPRQPWPVNHADVRALKSLHTPGGGGTNTNGASAAPPNSGSGTPGSPRLPVVDGGGLGPGASSIEAFVLRVQALITDDHALMERLIRFAQAHDLFKKNAERAQKLAQDSSAALETYQRQVRTLEEQLASSDGLYAPLSLFTYRGNLLMRLS	XP_009543423.1	1.8e-22	hypothetical protein HETIRDRAFT_155113 [Heterobasidion irregulare TC 32-1]	No differential expression	Not secreted	NA	NA	NA	NA
Lactarius akahatsu	Lacaka1|MSTRG.4284	3239	229	MYAPLALTFVYYNCLFHSISDPVFLRAPVVQITVNATTSSSSKAASHTGAIAGGIAGGVVGVILLVGTIAFVRRRRRDDFRKSAGTSFSGSAMMTVTPFNPALAGEAPLEEGPRLGIASDGPTSSSGPLLPPSQSVAPVPVGLTSKELARLRSTAISSPLTSHARTSSSGSQPTYPLHITIDTGAGSPSTPTPETRRLQSEMESLRREVQELRAERFEAPPSYGTGGGV	NA	NA	NA	No differential expression	Not secreted	NA	NA	NA	NA
Lactarius akahatsu	Lacaka1|MSTRG.5996	3603	229	MDDLFDSSKPHFAAWLQAHDMDESWYGLSVRQPRDAVPPLYYAALCGFYDLAERLIMKHPEQVNVGGGHILAPLPAALYKSHFRVADLLHQHAAAVDVRGFRERTPLHKAAMSGHVDIIRWLLNHGADANARQIDHWTPLHLAAYNNQLEAVQVLLEYNVDINSKNHAGETPLHLASLGRMAIARLLLSHGANVDEKDGKGETPFQVASSKGKHEMTKLLLEHGAVAQS	OCH94796.1	1.6e-10	hypothetical protein OBBRIDRAFT_746651, partial [Obba rivulosa]	No differential expression	Not secreted	NA	NA	PF13637.7,PF13606.7,PF12796.8,PF13857.7,PF00023.31	Ank_4,Ank_3,Ank_2,Ank_5,Ank
Lactarius akahatsu	Lacaka1|MSTRG.6435	8669	229	MLQWWVLAMLAYPEVQSRAHAELDEVVGSARPPTFADLPSLPYIRAMVKEILRWSPTVPFGLPHASTEDDWYEGMFIPKGTICLQNMRTLNFNPEVYGSNVAEFDPARYLDENGQVKVLMVDREEGHMSFGFGRRICPGRFVAEGTLAIDFATLLWAMRFDRADGERGELDVRTMVHAGATTYVIFACSVDGLILTTSWHSQPRAFEYKITPRFTEAESLLKDTLNLYG	XP_009549684.1	4.8e-55	cytochrome P450 monooxygenase 25 [Heterobasidion irregulare TC 32-1]	No differential expression	Not secreted	NA	NA	PF00067.23	p450
Lactarius akahatsu	Lacaka1|MSTRG.1311	1294	230	MNGIPFPTLPSLLSSTDELVHLHLDNIPQNNYISPAVMVECLAALPWLKFLSIGCQSATSRPDQMRPPPVTRELLPVLTTFAFQGDSKYLEDLVAQINSPRLNQIYTQYSNQLLTCKLRDFSNLAIAYKSPTRHAGVKSSHLWTTFKMYPRPQSHPDWDRIDSLILCVAIEGQVSRIARCSANLPLCSLVWFISISLDITEVVTAMNGRCSSANSSRYGYGHCTCYRSLT	NA	NA	NA	No differential expression	Not secreted	NA	NA	NA	NA
Lactarius akahatsu	Lacaka1|MSTRG.2728	5351	230	MPMVDRKMHSPVMIPISEKYKDMGTIAVGKLESGHVRKGDMLLLMPNKDEVEVAAMYNELEEEVNLAVSGDNVRIRLRGVEDDDISPGFVLTSLHKPVHAVRQFEAQLAVLDHKNIICAGYSAVMHVHTLAEEVTLSVRTRRVLYRLVERPEYGKQALLHYFDKTTGRKSRKPPQFAKKGQRIVALIETTAPICVERFVDYPQLGRFTLRDEGTNSCLFPYGTVSLNILS	OBZ76729.1	1.4e-86	Eukaryotic peptide chain release factor GTP-binding subunit, partial [Grifola frondosa]	No differential expression	Not secreted	NA	NA	PF03143.18,PF03144.26	GTP_EFTU_D3,GTP_EFTU_D2
Lactarius akahatsu	Lacaka1|MSTRG.3671	4821	230	MSTPQPNASTPPTVHTPPVISVPTIPLGAVQTMMSSLPLPVASQGAPSPHSAPASHPEVTPGVHVPASMPTPATQIAANHTAYAPASVSSYGGHAPAPPLARYSSPTLPERSHHPSPPRSDPPPGVGCFGRAITHYSVTVRHNRDERAHVLVGSFVTTYAPSWLADLSAAGASSLDQYEPGTVGARLQPTVDIAEAVSKKAARKGEDKRRLLTAVRRVADLSFVCIIQHT	NA	NA	NA	No differential expression	Not secreted	NA	NA	NA	NA
Lactarius akahatsu	Lacaka1|MSTRG.4749	2923	230	MHPGEATKEQTKVPRGEPGTVLSSRDQYFVTPSSLRSFYKTSRYVPLAADRNVLGVAGYIGDYPSPDDLREFMDLFRSDATSATYSVVEIKGGGYNPSNPTSEANTNIQYTSVIAYPTPHIFYSTGDIGINIQGDRFINWLDYVLGLERVPQTVSTPYSMPEYTVPPDYAMYICNLFAQLGVRGASVLFSSGNDGVGHGNCLLQDSSGHSRVQFLPTFPSTCAYGNSTFE	XP_009548822.1	4.2e-51	serine protease S53 [Heterobasidion irregulare TC 32-1]	Induced during mycorrhization	Not secreted	NA	NA	NA	NA
Lactarius akahatsu	Lacaka1|MSTRG.9816	4056	230	MPMVDRKMHSPVMIPISEKYKDMGTIAVGKLESGHVRKGDMLLLMPNKDEVEVAAMYNELEEEVNLAVSGDNVRIRLRGVEDDDISPGFVLTSLHKPVHAVRQFEAQLAVLDHKNIICAGYSAVMHVHTLAEEVTLSVRTRRVLSTLVERPEYGKQALLHYFDKTTGRKSRKPPQFAKKGQRIVALIETTAPICVERFVDYPQLGRFTLRDEGTNSCLFPYGTVSLNILS	OBZ76729.1	1.4e-86	Eukaryotic peptide chain release factor GTP-binding subunit, partial [Grifola frondosa]	No differential expression	Not secreted	NA	NA	PF03143.18,PF03144.26	GTP_EFTU_D3,GTP_EFTU_D2
Lactarius akahatsu	Lacaka1|MSTRG.4290	4237	231	MYAPLALTFVYGNRLFIRCLTCYFIRAPVVQITINGTVSSSSSTTSHTGAIAGGVAGGVVALILVVGAIAFVRRRRRQDNFRGSSFSGAAMEAGSQIKVTPFAPTLTGVALLEAGSQSGTASDGLTSSSEPLLPLLQSVAPVPVGLSSKELARMRSTAMRSPPTHTWSPPSGSQPSNPPTTISTAERSSTTTPPPETRRLQTEMESLRREVQELRAERFEAPPSYGAGGGV	NA	NA	NA	No differential expression	Not secreted	NA	NA	NA	NA
Lactarius akahatsu	Lacaka1|MSTRG.4840	778	231	MRASSGSPLSSPPESPTPAPHSLVFSLAPGLVLNNRCLEAGGSEDSFIPSSPIRSRDDMRRKAQKKRDEERDARAKQAREQEQQSRTIAFKECLDILSANKLTFAELTEYVFFHENQTPDWRYENFFINRGLVTRLLDFFVSSKVNKTCREDVRDWAESMVLQTIKKEVNTVTQSGDLRITEREIDSSFASGLSFDELKAMVRQHCPIFLRLLVNIITTGRQARSISKDRL	OJT13438.1	5.4e-14	hypothetical protein TRAPUB_10009 [Trametes pubescens]	No differential expression	Not secreted	NA	NA	NA	NA
Lactarius akahatsu	Lacaka1|MSTRG.8242	3638	231	MPAERRISDLTSFRYTPAKRAHPKPYQQRATSELLPPNGDCDPSLQEATDFSKCEQAQDDGSFRSSNYCKKGDIYYPLTPSERDAFRTEAGKRVPSHHWAVYDLIREIPAGKVSTYKGVSSVLGSGSPRSVGGALRNNPFAPRIPCHRVIASSLFVGGFKGEWSSSSHSDGDASAKVGGRNWHRAFRGGGMGPLQNEKLRMLVCEGVRFGRDGQLSVSQDAVWKFGQDADG	KZV73634.1	3.6e-34	hypothetical protein PENSPDRAFT_648789 [Peniophora sp. CONT]	No differential expression	Not secreted	NA	NA	PF01035.21	DNA_binding_1
Lactarius akahatsu	Lacaka1|MSTRG.1635	808	233	MRASSGSPLSSPPESPTPAPHSLVFSLAPGLVLNNRCLEAGGSEDSFIPSSPIRSHDDMRRKAQKKRDEERDARTKQAQEQEQQSRTIAFKECLDILSANKLTFAELTEYVFFHENQTPDWRYENFFINRGLVTRLLDFFVSSKVNKTCWEDVRDWAESVVLQTIKKEVNTVTQSGDLRITEREIDSSFKFASGLSFDELKAMVRQHCPIFLRLLVNIITTDRQARSVSKDRL	OJT13438.1	3.9e-12	hypothetical protein TRAPUB_10009 [Trametes pubescens]	No differential expression	Not secreted	NA	NA	NA	NA
Lactarius akahatsu	Lacaka1|MSTRG.2499	808	233	MRASSGSPLSSPPESPTPAPHSLVFSLAPGLVLNNRCLEAGGSEDSFIPSSPIRSHDDMRRKAQKKRDEERDARTKQAQEQEQQSRTIAFKECLDILSANKLTFAELTEYVFFHENQTPDWRYENFFINRGLVTRLLDFFVSSKVNKTCWEDVRDWAESVVLQTIKKEVNTVTQSGDLRITEREIDSSFKFASGLSFDELKAMVRQHCPIFLRLLVNIITTDRQARSVSKDRL	OJT13438.1	3.9e-12	hypothetical protein TRAPUB_10009 [Trametes pubescens]	No differential expression	Not secreted	NA	NA	NA	NA
Lactarius akahatsu	Lacaka1|MSTRG.455	5770	233	MPTASSRETAVPGSTNSRRAASRVAVLHASNNTYIHLPSPSVTPSVPPMNAVASPSSRPVQLQSSPHPTPPWEFTRRKRWADLIVTELSEAIVLVLSPGRKVLYCNPSVREMLGWLDDDLVDMDFTELVNGLYPPQSSEAIQLINRFVCPVNDRLSFCTAFTRSVESFNELHTYVRLRCNSDSSFAHLAMAPPPPAKEVLLEVMGYPYITPGDNACQCIFAVAKSYPSRNSAM	KDQ61132.1	2.6e-32	hypothetical protein JAAARDRAFT_32137 [Jaapia argillacea MUCL 33604]	No differential expression	Not secreted	NA	NA	PF13188.8	PAS_8
Lactarius akahatsu	Lacaka1|MSTRG.6447	906	233	AAELKATGKTKHKGSVANMSLGGGKSTTLDNAVNGAVDMGLHFAVAAGNDNRDACTFSPAAAEKAVTVGASTLGDERAYFSNYGPCVDVFAPGLNILSTWIGSESAANTISGTSMASPHTAGVLAYLLSIYPSVTFNPSTSSLVPQELNAQRPFTGSFTRLYQSVYSIMPRWAGGFLPSPRLLDAFTVPVFKPLSPADLKDALIKLSTKGLLSEIPKDTVNLLIFNNYTRYHY	XP_009553243.1	8.6e-92	serine protease S8 [Heterobasidion irregulare TC 32-1]	No differential expression	Not secreted	NA	S08A	PF00082.23	Peptidase_S8
Lactarius akahatsu	Lacaka1|MSTRG.6907	4483	233	MTKEFKEIFTAHFWRQLPELHRCLGFESIRVVKSPLEFTPVIYASVASALLADPTHGKQMTAATPADGPSSLLLLAMPRNRAPVELERNVHFVDADNDEIGGLCQNGSVTWAEISEWMQIVYMLPFNQYATFPCLGHGDPEDPVGQHGAPINMQANTDLVQPGYYVVLSPEGLPVEIPINDEGPIPRAATRSLSKLDPRVSSLPAFMYREIRLISNSLKNFVVSSANEIDIVL	KFY37365.1	3.2e-30	hypothetical protein V495_07224 [Pseudogymnoascus sp. VKM F-4514 (FW-929)]	No differential expression	Not secreted	NA	NA	NA	NA
Lactarius akahatsu	Lacaka1|MSTRG.3673	6086	234	MSTPQPNAPTPPPAEPNHPTIPAPTIPLGAVQTLISQLPPVAPQSAPSPYSTPASPVEISSDAPVHASSPSAFAFEPAPAPATRITADPADPAPASALSHGEHAPTPPRGTARVTRSYPVIVPEEPSLPPPRPIPLPGFHGFRRQNALYTDAEMVRQHEDRVHVRSLVNFYLSSWPPDSSVGGAGASTFDQYPEGSVGARLHPTIDDATLECAKAARTGENKSRLSLHTVNLFC	NA	NA	NA	No differential expression	Not secreted	NA	NA	NA	NA
Lactarius akahatsu	Lacaka1|MSTRG.4598	2469	234	MHRLQIITFGSVSIVFAIIGVDRTIFTHSASLDAVAAGWLILAMVDILWVLYFTSEEDSLSLYLFNSLGTGGLSPPSRRRRTRTASVHNSASYGGGGGYSAAGIGSAGYDTKLNNSFAPGIGSNPLDNAPPQSQRSANSAVGPVSPGPAHSALGADTSAPQGINSPLMSTPGNAGIGAGGGPPLPADTSIGSDSAYPYKAKALYACTSSGSFPNNDCADSEYRRCRYCVNGRSE	XP_009540374.1	3.9e-52	SH3-domain-containing membrane protein [Heterobasidion irregulare TC 32-1]	No differential expression	Not secreted	NA	NA	NA	NA
Lactarius akahatsu	Lacaka1|MSTRG.8600	1011	234	MKGSPGGLLRIDNLLHSHGYTVTFSNAPVVFGAFPSLHSACATMEALFLSHFFPQVAKYVWGYAAVLYWATMYLTHHYLIDVVGGSCLAIAFFYFFLPDDLKGPLATASPTGALANGTALANGRSKYEIYDIEDPHPNGDGLSYELSSDAASDEEETGIAYRSPGMVPDSGRTPTSAMPLIGPAAKQARRSHKHTASIASLIRADDRVEDGWSPIGNGSFVFPPTPTRPERDIR	XP_009551558.1	2.1e-85	hypothetical protein HETIRDRAFT_460872 [Heterobasidion irregulare TC 32-1]	No differential expression	Not secreted	NA	NA	PF14378.7,PF01569.22	PAP2_3,PAP2
Lactarius akahatsu	Lacaka1|MSTRG.3708	5441	235	MATDHIKDIISYAAADATAQVQIDFFQMISTQPSFKVPAGTMFEGFVLSWLYARPKAEPLRCFATNQADLEIPPCGKEQTTFFDRNSTLSKKDVNGCDKPPFCLLPKPKNFPTADAIVITDEFVITIQVTVSNEHGAKKDGFDEIKKIIPASLRIQKNKPKQYKPWRHVFITHSDHWAESLRKQNLPGLPDGALVYSGVFDILRSGITSKHVEAFNEKQKEKKVIGSWLHGISIY	NA	NA	NA	No differential expression	Not secreted	NA	NA	NA	NA
Lactarius akahatsu	Lacaka1|MSTRG.4755	6452	235	MVEEFFESSGESLKSSDARQEWAADMFHNFKFVFGEDERASVFSGQRDLADVSRFQGKRRLMHSPFIVRVFAVHLVRIAGAIDIDPAVEGVSSSQKYPPRGALALATAAVSTRKKVERVLQLWANGEMDAPVTVPTKRKFKKTYMKAAPRLNLADGNISKFSSDVWAAPTTNYYKSITKLKLGSLEAIVKAANTFLSQARLQVQGSSVDPSSIADDDDDLRACLVDDSDLDSGSE	EGO01382.1	7.7e-16	hypothetical protein SERLA73DRAFT_151829 [Serpula lacrymans var. lacrymans S7.3]	No differential expression	Not secreted	NA	NA	NA	NA
Lactarius akahatsu	Lacaka1|MSTRG.9372	2514	235	MGCYKKLSPDSGDQTVALLTQLVEFSTGAPVVVQSSPPFKVPASIVRVNVMWFLSLSCALLATLMRQWGRGYREHSQYRGSLRNRARIRAYIFQGVETFYFSWAVEAVPLLLHTSVFLFFAGLVDFLLPINKVVCFSTLGCVVVFKFIYAILTLIPSVDLNCPYFTPLSGITYFSFQLSALNLFSIAKAFEGISHRLLLVIRGWFHPDVPGSPDVWPAKWRAMLENKVSTHYELF	KZP06859.1	3.2e-30	hypothetical protein FIBSPDRAFT_1053306 [Fibularhizoctonia sp. CBS 109695]	No differential expression	Not secreted	NA	NA	NA	NA
Lactarius akahatsu	Lacaka1|MSTRG.9641	1734	235	AQDFIHRLLDANPSTRMTLTDALNHPWLSRGAASNAVPAPTPPTTSQPLPPPTSNPAAAHAGIDRNLSDLSELSELPEDAEIEAAEGDIQRDVSMLSAAPSADDMPGVHALNIGSPARGRVRAPLERRSQVLARELAAEVDAGVSPTAAATTPANGSGKRTRDVTGSSDGDVAMGDGGPASGPDSDGAGVAQAPRAAKRGRRSTDDPPPGNGTGRALRSRNAAAPAGAAGGAAPR	NA	NA	NA	No differential expression	Not secreted	NA	NA	NA	NA
Lactarius akahatsu	Lacaka1|MSTRG.5278	6651	236	MVYINDSELATKLGSVKEKQTGRRHVDAQLRIFIDFVDAGSQMPSVVGGLVSDAVFMASTGQFAGDPSDPFPDNGIPLRFGQGEGVGLVRDPANPTGCHAYIQTFTDEAILVRRGECTFLEKLQRAHEVGASGVVVINDSDEVVSPSASTEDLKDVGDSLDDAAVVVLGASDGRQVSAMLDVAEDHHVGRVVLVLENLERDAASPEQDPTEEQSGFAGNRILYINGHALLNTRLLV	XP_009544054.1	3.2e-46	glycoside hydrolase family 47 protein [Heterobasidion irregulare TC 32-1]	No differential expression	Not secreted	NA	NA	NA	NA
Lactarius akahatsu	Lacaka1|MSTRG.10571	4258	237	YTISQVLSVLVVTAGVILTTLSSNQSHRTADITTFDSHRYLQGIAILTLALVLSGFLGVVQDKTYASYAKSTPPDAGVRRADSSADTKAVVLPDIWEESMFYLHFLSLPVFFSVRKDLTMQVKELFTSATMLPVPLLAARITLPTVLPALLANTLTQLLCVAGVNRLTTQVPALTVTLVLVVRKVVSLVLSVLLFDGANVTWGMLWSGASLVFTGTVVYTVSGSAPINREGRREKKE	XP_009544091.1	2.7e-45	UDP-N-acetylglucosamine transporter [Heterobasidion irregulare TC 32-1]	No differential expression	Not secreted	NA	NA	PF08449.12	UAA
Lactarius akahatsu	Lacaka1|MSTRG.10779	3397	237	PMAGAEYEPGRSVPAPCPQHRPLTPADRAKKRRRSRATLDKIFRRSDAIDREALCVLTGERVWHLRLSVHVLSAASSSSSSDAAAAAGGGGGLLDCASLACAAALRHFRRPEVEVHGTGEVTVYAPEARAPVPLALHHTPFCVSFAFYSEGKGSEQLKVRMLLDPAGLELRLAHGVLVLALTAQRELAVVHKAGGLPLAPETLIGAVEIAARRARELETWLDVHVRDDWARKNVEVR	XP_007310164.1	1.1e-51	ribosomal protein S5 domain 2-like protein [Stereum hirsutum FP-91666 SS1]	No differential expression	Not secreted	NA	NA	PF03725.16	RNase_PH_C
Lactarius akahatsu	Lacaka1|MSTRG.5350	1021	237	DAPIADIFPGSREELQLPEVWTRIHTPPSMAIQIDANRYPADNTGTGVGSCGFQASGSQALDKSRCAPPPEPERQLHFDRGQVTLASSLPPTVQLNDPLVAPSIPTSVLQGQGRIADTTERCEKKTWCSLCKIGFSQSQVLGRHKKDKHESKESCSFCTSFKWSRGRPYLYKNHLRMRHFQITPTNDRQKGSKAHQGNMKPQALVTGLVQSIRPFPLSIHSLSHDDRTIGSKQLTGK	NA	NA	NA	No differential expression	Not secreted	NA	NA	NA	NA
Lactarius akahatsu	Lacaka1|MSTRG.6935	1521	237	MRYVLEAACDLNVQDTSPELQREFCILWNQIFLKVQNDNNGWMAAYILRPIRNVYVALHQDTEAAPTRFFGTTGSQDDVLRQPSSYPFCNIPGHHPDSTPRIHDHYTSTTFAHIATPASIASPDASSSSVPAPFHVVNTPMDVPPLINVYAPGSSPRPSDIYRKPQHSCCPARSSHRCQFRYNDVPSHSRNLDIRPSFRYLFTRCRYLPAQSKPPDAFRCTNPRNIRRGGKSKCATQ	NA	NA	NA	No differential expression	Not secreted	NA	NA	NA	NA
Lactarius akahatsu	Lacaka1|MSTRG.6821	2551	238	MTSDLDLLRDLFLLYPRMEQTLWDAIRDADIGSCLSVPEFHFKKERLLFLRILDSGSHGTMGLSTDQTRRVADAVLKQQDKRSTLAVLETFAKDDKGIFSRIKGFFRSSSGEEGSWQSASKRASSVPDSQFLSDLKTIPVDNYLYEAAVDVEGTAYALLTKRVDTLVSRISQNILLAQKKECDKQVRREAEIEEAGQVQVLWSEFVRKVKDESAQRSTSYVPCSVWNDRKLNVAQAHN	NA	NA	NA	No differential expression	Not secreted	NA	NA	NA	NA
Lactarius akahatsu	Lacaka1|MSTRG.9633	6356	238	DETAAAIHTLDGLLQPPNPQKSLEATAMLASLRLHPRPGVSSSDAAQERTKARELFDRVYRAIEQSEDATAQNGSPSRNDSSLSRAVVDDVDMHIEFARLLQSENLERTGKVFAEAVRVGEEAGRVDPRLLNNLGVVSHLESRFGEARIMYENALVGASALGAEAEAMSTSVLYNLARVYEDLNDEGKAMEAYEKLLERHPEYVDGTHHPIAVIDGFFDTPKSQNSASPHIGQHASRE	XP_009546984.1	9.1e-65	putative potassium uptake [Heterobasidion irregulare TC 32-1]	No differential expression	Not secreted	NA	NA	PF07719.18,PF13424.7,PF00515.29,PF13181.7,PF13174.7	TPR_2,TPR_12,TPR_1,TPR_8,TPR_6
Lactarius akahatsu	Lacaka1|MSTRG.1021	720	239	MSVMLLLEVAARNEKVYMFRVCHLAPVATATSTDIIRTGESYKHATPIDMLPDNVLVEIFDLSRRTLRYNILPAWRWHLLVHVCQRWRQIIFASPHRLKLQILCTHKTPVRKNLGIWPAFPITIDYRYPGRSVKPKGEGNVIAALEHPDRLYYVRLAVTGSQFKKMAVVMQKPFPMLTHLEISLCDGAVLALPAEFLGGSAPRLQAIHLNAIPFPPLSALLLSLVTLSLHNIPLAGYTS	NA	NA	NA	No differential expression	Not secreted	NA	NA	NA	NA
Lactarius akahatsu	Lacaka1|MSTRG.10397	4836	239	MNYHMAIDMWSLGCILAELKTGFPIFPGENEQEQLSCIMEVLGLPDKDFVNRSSRKRLFFGMFSVFSILSVPYSLLDSTGAPRPVVNSKGRRRRPGTKTLAQVLRCEDELFIDFVSKCLMWDPERRIKPQNAMRHPFITAGKRSKGSTPSSTTAKALLSTASSLTSRSKPTDTPKKSQISAPTPLTARISRTTNAQPSTPGGASTSMHSLGSARSYRTSQSQTISSYHSSRTISGFAVR	XP_009542468.1	1.1e-83	hypothetical protein HETIRDRAFT_379660 [Heterobasidion irregulare TC 32-1]	No differential expression	Not secreted	NA	NA	PF00069.26	Pkinase
Lactarius akahatsu	Lacaka1|MSTRG.6645	3714	239	MYIKDGLNAACSQLTFRYLKSQLTALVSSRLIFPLRQLSILSYPSKYTLLTHRPSASLRFHRTHSTTPFLIMPGGRNFLPLPVGKSNKEPHPITLLLTEILSEIMCYCYLPFFFGHEAPSIHPLHHDIDPSGGFTKDGPVRTLHWVAVSHVCRRWREIALRCKALWTAVPLVSVSWAQRALTLSHPHPITLHIDSKDTSLDKGYVSVDALYLALTHISRIHKIRIRSPWGTRHGDGRRI	KZV77433.1	4.6e-08	hypothetical protein PENSPDRAFT_746586 [Peniophora sp. CONT]	No differential expression	Not secreted	NA	NA	PF12937.8	F-box-like
Lactarius akahatsu	Lacaka1|MSTRG.8696	3243	239	MEGGGFSAVDPRETYVPLTLDGFGDLKGCLLRSGLWKECSMVSPSFTVAALGILRLPSSSAIIQDIIALREAGLASMAYFYFDLRDMDKRSRRGLLTSFLVQLSTHSNPFCDVLFRLYGAHDDGARQPSDSTLLNCLKDMLTLPDQAPVYLILDALDECPNTLGVPSSREQVLELVKELIHLHLPSLRICVTSRPEVDIQAALGNILSHSVSLHDERGQNTDIADYITSAVHSDRRMRK	OCH90532.1	1.7e-39	hypothetical protein OBBRIDRAFT_592935 [Obba rivulosa]	No differential expression	Not secreted	NA	NA	PF05729.13	NACHT
Lactarius akahatsu	Lacaka1|MSTRG.4285	2849	240	MYAPLALTSVHSKRFFIRCLTHYFLRAPVVQITVNATTTTSSSSKATPHTGAIVGGIAGGVLALILVVGTIVFVRRRRGQDDFRKSTGTSFSGAAMEAGSQMVVTPFSPALAAAAAASLEATYQSGSTTSFVSEPPPPLPPSQSAALAPVPVGLTDKELARLRSAAIRSPPTSHARTSSSGSQPTVTYPSTIGTNEGSTSTPTPETRRLQSEVESLRREMQELRAERFEAPPSYGTGGGV	NA	NA	NA	No differential expression	Not secreted	NA	NA	NA	NA
Lactarius akahatsu	Lacaka1|MSTRG.6371	6222	240	MTVERPHHTRTPSERRSSGAPTPDVTDAERTYAEPLSEGEGDEEMDLAPARDEGARIGLANAQAADAIAYREKQLKERAQKAGPSRARSSECLPVLHAPPTTPAPRPPPRLRTLSIDPLAPSLTFDERFKARLRAVKCADEEAEADETQVSPRSDETGDDRVLTREWRAPPGKRIAIPVRIEPKVYFATERTFLVRVHPLRLSCSTLSLPAIFLASTEVAPLCHIRRIDRDDVTQLYPSG	KDQ57085.1	5.4e-33	hypothetical protein JAAARDRAFT_131276 [Jaapia argillacea MUCL 33604]	No differential expression	Not secreted	NA	NA	NA	NA
Lactarius akahatsu	Lacaka1|MSTRG.7566	3406	241	MASASASRLHRQQDGSNSPLQQLPRGIPVTSSHRRSPSLSRYPKFEESSVDEKSRLDGVARVSPSKTEASASPASATESLFARQPTSRPSSAASLRHLTSHSNNSSPDLPLSPIPNTASSQFALPLPSLHSDYIHPPRKIRLWSIIKPWIPVLAYLSTSLGFLVALAFWKAQVFQGAFSIVIIIYSNPHLNGYLRFAPSDAIGITVVLTSICLRPQVWTTCPAGSRPTRLLAMAFSFSSSS	XP_007302883.1	1.2e-11	hypothetical protein STEHIDRAFT_120442 [Stereum hirsutum FP-91666 SS1]	No differential expression	Not secreted	NA	NA	NA	NA
Lactarius akahatsu	Lacaka1|MSTRG.9542	2043	242	EISSTACDSPVSLEKALDRIVSPKSLNSSLPPLSSPHQQARRDTLHTLRQLATLGQSATLPQADSPRQSWTQKSGRAFQAVNIKFLPSTSSAPSSFIINEPGLLGKKVSYIFGLIEAKIGYSVSISELLFGISCLDNERTLSSYGIASGDTINVTLEVDRFMGKKPVIYLYPPSSLADVTVELALASSWRFSAVHPPPWTTIPPGDPHTAQCVTWTVAAEPNGMLVDKTSGMEVSYLYWEAM	CUA67942.1	4.5e-19	Polyubiquitin-C [Rhizoctonia solani]	No differential expression	Not secreted	NA	NA	NA	NA
Lactarius akahatsu	Lacaka1|MSTRG.4766	5222	243	MEHLELHDHRSSNPSCDSFRDQCQSPFLPDFGFSEDTLPHSSPQGLRGRRSSKKYILVIVCHGTHGGCSNGWALSLDDQDVSQLLPMRDVNFDLGVSMSRSYRSLALVFTKASQITWSGSERQHALGKDILLHHPEDQVDSFSLYIKGCMLLSRVKVYNLRFRSKRFVGDPAFTYASTYAEAWEKVGDEGKDKAADPRRTSGFLEIDHIASMFRQSFPLYLRNPIRDSSVDSHLYTACLTPHL	XP_009540931.1	8.7e-47	hypothetical protein HETIRDRAFT_377690 [Heterobasidion irregulare TC 32-1]	No differential expression	Not secreted	NA	NA	NA	NA
Lactarius akahatsu	Lacaka1|MSTRG.5163	3591	243	MRRGGETTEQTKVPEGDPGTVLSSRDQDVTPSFLRTFYKTSSYVPSAAGWNMLGVAGFNDDWPSPDDLRQFMNQYRFDATDATYRVVQIKGGGYDPSNPTHEANLNTQYTSAIAYPTTHIFYSTRGSDTLGDRFINWLDYVLGLLNVPQTVSAPYGIPEYKVSPDYATHVCNLLAQLGARGASVLHSSGNDGVGRGNCLVQDSSGNSRVQFTPNFPSTCAYGISTLPSSSKQALIDFSLNHPR	XP_009548822.1	1e-50	serine protease S53 [Heterobasidion irregulare TC 32-1]	Induced during mycorrhization	Not secreted	NA	NA	NA	NA
Lactarius akahatsu	Lacaka1|MSTRG.5174	1505	243	RIHKTPPTSTSQISIRPSLTLTFPLPSLLPPPRPIFAAKICSLGEHALVLELGHQHQLCVTRDSASTVGTKISQGHSAALPSTQASKDPCIFFEGVDKFLLSWAVEALPTLLHVSLFLFFAGVSVFLWNVDLTIFKSVVSWIGICTALYGFITFFPVFRHDSPYNTPLSLPACHIVAVISLVTFRVLQWFTVFIARVFFLFFDLGSFLFVILLYKPMLDSHPWSKALVNCYCEACRRRSRKPL	RDB28392.1	4.5e-11	hypothetical protein Hypma_015729 [Hypsizygus marmoreus]	No differential expression	Not secreted	NA	NA	NA	NA
Lactarius akahatsu	Lacaka1|MSTRG.7924	5699	244	MSNANPPQIAYILEPLLSYISSCLPPPVYHALLTLITHGLAFLSALISLGTALITSRPSDWDVQKILPPIITLLAAYLALSSAVRTATWFVRMTTWIIKWGIITAAVSAATAWVFASGGVVPSLTGLALNMLNGQGQDAAGGPRGSRQHGRTRPQAWESFDQHWEWQFEEQQWNTADATSPSQHVQQFIADALQRARDGGLWSIARGALQSFSDPGSPAREGGDSHDDSVNSDGERSAPSGQSY	XP_007864319.1	5.7e-38	hypothetical protein GLOTRDRAFT_73793 [Gloeophyllum trabeum ATCC 11539]	No differential expression	Not secreted	NA	NA	NA	NA
Lactarius akahatsu	Lacaka1|MSTRG.6611	6702	245	MVMVSSISSTPSRSRFAKTGGTASTTDALTERNSPSAFSFPFPLRLGALSDEPSVFMGARRQGRASSSADRTGEVFEIPAYAVATDRLLLAGLATPVINSSCRFGTVWYVSRLSHGMTETNPFVLSVGPQNYHPNPYHGNANIRESTVRGLTTSCQKYVRAWSSTIGLTAFLFHADAKHRPQGAMGSDVAGVGNATTGSMTDKLTREHRMTVDEAHLILNAKRGDNLEHILQVCPLLCGSRMCDF	KZT21375.1	4.7e-16	hypothetical protein NEOLEDRAFT_1139479 [Neolentinus lepideus HHB14362 ss-1]	No differential expression	Not secreted	NA	NA	NA	NA
Lactarius akahatsu	Lacaka1|MSTRG.3112	3197	246	MIDYLLLTAQAHPHRFPNGIVVDGVDTSKSAAQPTAAAVEDDFFSSWDKPAPKAKPASPPPKPAAPPSIGRTVSAPASASPSPAPAAAAPRTVTSSSLRSNSSAAASARTLTSSSTSSTGTGVGAARPAKKGLGAKKAAPVDFAEAERRAAAEAERIRQLGYDREREEAEAQAAREAAALELKNKNATATGAGAKQAATSGASAADVERLGMGVKKLGFGALPRAQPAAPKTSVVVFSALGNCRHN	XP_009546834.1	2.5e-09	hypothetical protein HETIRDRAFT_318381 [Heterobasidion irregulare TC 32-1]	No differential expression	Not secreted	NA	NA	NA	NA
Lactarius akahatsu	Lacaka1|MSTRG.8771	5369	246	MAVSGTHTTTGQTNLGASQLNNAAREVYYIKGSVDALLPRCKFYYVAEDSTPALDTNMRSVIAGKAQAAAARGLRVLAMAYGYGSVEPATSTQNSSVPSRAPSPSAGAHMSSSSSSSGGSSSNGLGFGEKEKAHLVFAGFAAMLDPPRKGVADAVALLQSGGVQVVMITGDAEETALSVARTLGLRGATGAGACLTGAALDRMSAAQLRERVGNVSVFARTSPKHKMAIVGAFQARGAVVAMTGDG	XP_009553045.1	1.8e-63	P-type ATPase [Heterobasidion irregulare TC 32-1]	No differential expression	Not secreted	NA	NA	PF00702.27	Hydrolase
Lactarius akahatsu	Lacaka1|MSTRG.10565	13948	247	MSPVWNRRRLIIAMSRYASEVDIDFVRKAVRSIGRITIKVEAAADACIRSLLALIETKVSYVVQEAIIVIKDIFRRYPGRYEGIIPKLCENLDALDEPEAKASMVWIIGQFANRINNADELMDDLTYNFLEEPIEVQFALVTAAVKLFIYKSSSDPVKALVHKVLKWTTEEVDNPDLRDRGFMYWRLLAINPTVAGEIVLSEKPAITNDADRMDRGALDQLLLHTGTLGSIYHKNPEVRLSVTSVLL	XP_009542816.1	4.3e-110	hypothetical protein HETIRDRAFT_380250 [Heterobasidion irregulare TC 32-1]	No differential expression	Not secreted	NA	NA	PF01602.21	Adaptin_N
Lactarius akahatsu	Lacaka1|MSTRG.12211	2623	247	VRPLLAATRSDAELHKKEAELLLIKERAERDAKEKEALESLKMRLEAEKRKAEDALAAERNLAIDKDSLLERSKRRELELEEEVAALQGDLDTLDSQLDRALKIQKESEDKHEALRQAFDQAAEHLVHLESEQQEWASREEELLKRLASTDQDQEELRRERGELEMEATELRRQLSQREEDLSRVKERMEIAISELDGKLSSEVQAQCVFFTNVVVTLISCFLDRVVNSQKIVRTRSNTTSVRPEPS	XP_006456116.1	5.1e-34	hypothetical protein AGABI2DRAFT_188171 [Agaricus bisporus var. bisporus H97]	No differential expression	Not secreted	NA	NA	NA	NA
Lactarius akahatsu	Lacaka1|MSTRG.4778	4913	247	MLFADSPLCMEHTAAYPNDPYPQCGPEATYENLSFDANTISRDDKALTMSSLGYAVAPAAPMKPSPIPLAPDVGTQDVPDFTFGSPPVAPFRGDLAYQQQWWPEQHSAHTLTPEVSQGYPTIPNQEPWEYDYSLVEAMEAQPHGHGVLHLGESERRSILRKHRYEPSYRIDGQDTRFTCTVENCGKNFSGEWEKSRHIKSMHRPPTIGCSKCNYKQSRKDLFSEHCKKRHPGESIEELRVQLDVSDA	NA	NA	NA	No differential expression	Not secreted	NA	NA	NA	NA
Lactarius akahatsu	Lacaka1|MSTRG.5497	743	247	GESYKHATAIDILPDNVLVEIFDLSRRTLRYNILPAWRWHLLVHVCQRWRQIIFASPHRLKLQILCTHKTPVRKNLGIWPAFPITIDYRYPGRSIKPKGEGNVIVALEHPDRLYYVRLAVTGSQFKKMAVVMQKPFPMLTHLEISLCDGAVLVLPAEFLGGSAPRLQAIHLNAIPFPPLSALLLSLVTLSLRNIPLAGYTSPEAMVTSLAVLPRLENLIIEFQSAASRPDRLRPPPVTRTVLPVLKC	XP_007299642.1	6.2e-08	hypothetical protein STEHIDRAFT_165249 [Stereum hirsutum FP-91666 SS1]	No differential expression	Not secreted	NA	NA	NA	NA
Lactarius akahatsu	Lacaka1|MSTRG.3510	1924	248	MAISMQEPFPELRYLAIHSRSQNMPILPDGFLGGSAPCLREISFSGIPFPTLPTFLSSASDLIKLILVDIPPTGYISPAALAACLAVLPRLECLSIEFQSPDSPTDRTHLAPEIRAILPSLTTLIFEGESAYLEVIMARIDTPQLDSIDITFTDDRDFRATDLSKFIERSALKPSRFGYAKIPFECDGICFYFFRKIDTVSPTIAIRIASSDWLPDLVLDMARVLNQTSAMLSDVVRLEVTIESSSPH	NA	NA	NA	No differential expression	Not secreted	NA	NA	NA	NA
Lactarius akahatsu	Lacaka1|MSTRG.7241	5286	248	MRTRLLTTVTQLRHSEQEHNRTQSSSNIDDRTQHEIYAAPFLRSVMAGVASVMCSYNLVNGVYACDNNSTLNGILKSEFGFQGFVMSDWSAQHSTLSAITGLDMTMPGDITFNSGTSYFGANLTAYVQNDTIPEARVDDMATRILAGWYLLGQDSPSYPHTNFNAFQPLDEATNEHIDVQDDHDEVVREVGAASTVLLKNVDGALPLKKPRKLVLVGSDAGPARVAGPNEFFDQGGVDGILAMGWGSG	RDB23963.1	3.5e-99	putative beta-glucosidase L [Hypsizygus marmoreus]	No differential expression	Not secreted	NA	NA	PF00933.22	Glyco_hydro_3
Lactarius akahatsu	Lacaka1|MSTRG.8711	6927	248	MGKYNGNFRKNSPYYTPLSSLIYRLSQLTPAPMAAYRHSRATSSNRVEGTLRMRKITEESAQRLLQGLDGRTLKWTFKSLNQDHEFERFFAGIPDFCDSRVVADPVGLLRELNDDKQKLSQALIGLMHRTMTSHLISEPTRRQRIRICTRAIDAVPALVSWLILRRVFGEWERLLESVDSGDAILHMGGDRYSDPRTAFCARCIVAVVIARGQVYGDRWSGLTSQFLTSDMEVWCSHCVTVFFRLLLL	NA	NA	NA	No differential expression	Not secreted	NA	NA	NA	NA
Lactarius akahatsu	Lacaka1|MSTRG.9948	2315	248	MAISMQEPFPELRYLAIHSRSQNMPILPDGFLGGSAPCLREISFSGIPFPTLPTFLSSASDLIKLILVDIPPTGYISPAALAACLAVLPRLECLSIEFQSPDSPTDRTHLAPEIRAILPSLTTLIFEGESAYLEVIMARIDTPQLDSIDITFTDDRDFRATDLSKFIERSALKPSRFGYAKIPFECDGICFYFFRKIDTVSPTIAIRIASSDWLPDLVLDMARVLNQTSAMLSDVVRLEVTIESSSPH	NA	NA	NA	No differential expression	Not secreted	NA	NA	NA	NA
Lactarius akahatsu	Lacaka1|MSTRG.5688	1702	250	MAQLERLVVHFRTALPNHAVERTLWGAPTTPTALPRLQLLFIDFFAQFTFDLPSLVRFVRAAQPSPEGGGGAIQRSQFHAAELHFDAKTTCMLLDSRKTDRARPGGARTNPVQLRVSCRTLDWQLASLAQICGALTPLFAYVEGLTLGLHISHPKPDASSDCLDPDRAQWHALLRAFGSTKTLQLAGPHAVHVLHELLPLPTELLPAPQELLPGDDEEPGAVEDDEDGLAAFAAEREATGRPVGVVRDWW	NA	NA	NA	No differential expression	Not secreted	NA	NA	NA	NA
Lactarius akahatsu	Lacaka1|MSTRG.5844	4017	250	NRSRSRSPDNAPPPSRRRSLSPPAPRGVVDVSRVDDVDPVRRAERERQLAARMAAVELGKTEDNKKGDAKDKGFDAVAEFAKLTSSRSGGVYMPPARLRALQAAAAQDRSSPEYQRLSWDALRKSITGIVNRVNVSNIKHVVPELLSENLIRGRGLFARSIMKAQAASLPFTPVFAALVSILNTKLPMVGELLIHRLISQFRRAFKRNDKVRHKILHVMSARLRRRRHRLFAILQPRSSHISSTKVSPMS	EPS98603.1	1.8e-79	hypothetical protein FOMPIDRAFT_1148765 [Fomitopsis pinicola FP-58527 SS1]	No differential expression	Not secreted	NA	NA	NA	NA
Lactarius akahatsu	Lacaka1|MSTRG.7909	1695	250	MAQLERLVVHFRTALPNHAVERTLWGAPTTPTALPRLQLLFIDFFAQLTFDLPSLVRFVRAAQPSPEGGGGAIQRSQFHAAELHFDAKTTCMLLDSRKTDRARPGGARTNPVQLRVSCRTLDWQLASLAQICGALTPLFAYVEGLTLGLHISHPKPDASSDCLDPDRAQWHALLRAFGSTKTLQLAGPHAVHVLHELLPLPTELLLAPQELLPGDDEEPGAVEDDEDGLAAFAAEREATGRPVGVVRDWW	NA	NA	NA	No differential expression	Not secreted	NA	NA	NA	NA
Lactarius akahatsu	Lacaka1|MSTRG.6172	1879	251	IGPHSQQVVTETLSDDVLLNIFCHYLDAAPRTWPTLTYVCQRWRQIVHTSPLGLNLRLYCTYGTPVLKTLDYWPALPLILKYGGFPDLDPPTPEDDDNIITALKQPGRVSSISLTVTSSLLGKLSAISEPLSELEELVLLSRDTMQLPLPSAFRWGPRLCNLHSTRVAFPSLPQLLSHSHNLVDILLHEIPSVGYFSPDTFANSLSGMANLRTLSLLFPFPPVPPKLPCLASTVGGTRCSPRPDVPQISRN	NA	NA	NA	No differential expression	Not secreted	NA	NA	NA	NA
Lactarius akahatsu	Lacaka1|MSTRG.6618	2425	251	MQEEQYQRFSTHANTHLPFQPIPGSEDPGDGICPRFLLSVPLSLSIQADQVPVGHIPRSMTVHVNGSLTRTMSPGDIVHLGGIFLPIPYTGFQAVRAGLLTDTYLEAHYIHQLKKQYSEMEVTAEMRAAIERLHDDPTVYQKLAFSIAPEIYGHIDVKKALLLLLVGGVTKTMGGGMKIRGDLNVCLMGDPGVAKSQLLKYISKVAPRGVYTTGKGSSGVGLTAAVMRDPVTNEMVLGAFHSPLSEFLFSY	KZT71252.1	2.1e-91	MCM-domain-containing protein [Daedalea quercina L-15889]	No differential expression	Not secreted	NA	NA	PF00493.24,PF17207.4	MCM,MCM_OB
Lactarius akahatsu	Lacaka1|MSTRG.6815	755	251	TAYHWTTFASTDGIPITLPDFPVGLDSALLTSIVNRNNIHLIGLDVTSQTCRSVVLDITCKATEFSFQQQRSKAPTSHGKETAHNCLIDCHSDVWTRFPVVAAVKRRTITSSSERQPKTLTFVTDDDQRPFSFYFSEMVRSFTKTSRKPTGDVLKGITVSARTFASFAGAFLSSPEWPVSRFRAGEWLADLLCLIPIHIAVTHENRFVPLKDGVLSAQLEISLLGAEVNRIVDSLSIGWYESIFQSYWASK	KIK47713.1	1e-82	hypothetical protein CY34DRAFT_8765 [Suillus luteus UH-Slu-Lm8-n1]	No differential expression	Not secreted	NA	NA	NA	NA
Lactarius akahatsu	Lacaka1|MSTRG.7921	1686	251	MAVGGSATSCAIYVLKLIIQVNHRGSRVIQFTHFSVKEFLTSDRLSASKGEASYFHIIPEPAHTTLAQACLGILFQLGRNNNGVEDGFPLMRYASRHWVEHAQFGMVSSRIEDGIRRLFDSAEPYFAAWVRLYSIDDRWDSFGGFTTHRGSPLYYASLCGFHDLVAHITVEHPEQVNARGGYNHSPLAAALYKRHFKVAELLHRHGAAVDVAHDEFKGTPLHAASMDGLIDITRWLLDHGANANAQQSDLL	OCH94796.1	6.5e-37	hypothetical protein OBBRIDRAFT_746651, partial [Obba rivulosa]	No differential expression	Not secreted	NA	NA	PF12796.8,PF13857.7,PF13637.7,PF13606.7	Ank_2,Ank_5,Ank_4,Ank_3
Lactarius akahatsu	Lacaka1|MSTRG.10330	2126	252	MCIASTTKTTRSCARFTRASACAVVRQLYTVSEVRNCPFDLPTLELDLRVVHPECTPGTRDTIPPRSRWLTLPDEVTELPEKMVYKLSYQTEGHSPEGDLLSGSGSLGQFGIVDIVGSYICTPEHAPEEPFGSTAHHVRNSTFWPLCNQSVERSPDNRYLHCTAMALEGLPLLYTSDVEAGIPSPAELLESILHAMIGEKDSSSCLFDLSPFPIAGHYNLYLGGVLHRDISNGNILRLREPIERPHSRSASL	NA	NA	NA	No differential expression	Not secreted	NA	NA	NA	NA
Lactarius akahatsu	Lacaka1|MSTRG.4294	5247	252	MSSPISSVCCVDLGANGLCLCMQQRVRLSPLLLHPHPPPPLSVGRACKRRRTRLFTHMRLLAENFLASRESHVARFCSERGLHLSCPASDFLETLDEQAFFTGGDALGGADVEMSGAVAQPPSGNDDGTMPEPSALSEQQTQPQVNDLLQRYVDLVPPVLPSASLAEKFLLTAADPAPGTRDERLKRVIRTKYEAGLLKPYNYVKGYARLSRWMDCKYVGSHSWKVVVVADIVATLVCRRNQSSRSCSLYQC	KIM80658.1	1.8e-23	hypothetical protein PILCRDRAFT_528412 [Piloderma croceum F 1598]	No differential expression	Not secreted	NA	NA	NA	NA
Lactarius akahatsu	Lacaka1|MSTRG.6811	856	252	MTAYHWTTFASTDGIPITLPDFPVNLDEALLTSIVNRNNIHLIGLDVISQTCRSVVLDITCKATEFTFQEERSKASTSRSKETVNNSLIDCHSDVWTRFPVVAAIKRHTITSSSQRQRRTLTFITDDDQYPFTFYFSEMVRSFTKTSRKPTGDVLKHITVSARTFASFAGDFLSSPKWPISRFRAGEWLVDLLCLIPIHIAITHENRFVPLKDGVLSARLEISLLGAEVDRIVDSLSIGWYESIFQSYWASK	KIK47713.1	1.8e-79	hypothetical protein CY34DRAFT_8765 [Suillus luteus UH-Slu-Lm8-n1]	No differential expression	Not secreted	NA	NA	NA	NA
Lactarius akahatsu	Lacaka1|MSTRG.6926	5255	252	MTFGYGPTTLPDGWSEAVLSNQESEDCLIPMGITSENVAADYGITRAQQDAFAANSFKKAAAAAKAGGFRDEIAPLKVNWVDPKSEQVKEITVSADDGVRDGVTAESLSKLKPAFKKDGTTHAGNASQISDGAAAVLLARRSTAKRLGLPIVGKFVAAAVAGVPPRVMGIGPAFAIPKVLKQTGLKPEDVEFFEINEAFASQAVYSIEKLGLPYEKVNLHGGAIAIGHPLGMSEFLPCLPTAGDLVNLPFFT	OJT08574.1	3.3e-97	3-ketoacyl-CoA thiolase, peroxisomal [Trametes pubescens]	No differential expression	Not secreted	NA	NA	PF00108.24,PF02803.19	Thiolase_N,Thiolase_C
Lactarius akahatsu	Lacaka1|MSTRG.9666	11296	252	MFSTCIRVTCISDELMDRDVSSVLTYVSFFVTICYHTIYARPWIYPALAFYALDLLLRLFRYRIKDATLTSVGNMTIVCFCISFPLGFRSMTCSQINIYDCDGGWEAGQHVQLRIFFEGRVFESHPLTIANAPTSTSCLSSRSIVLGARVMGDWSRALDHYASTEQKRIARENSEKVDAVPVPVQVMIDGPYGGCSLDLGEYESVLLIAGGAGVTFTLGLLDDLVGRIVRHQRARGELHPARRIRLGDPFLW	XP_009547914.1	6.9e-71	ferric reductase [Heterobasidion irregulare TC 32-1]	No differential expression	Not secreted	NA	NA	PF08022.13	FAD_binding_8
Lactarius akahatsu	Lacaka1|MSTRG.8699	4345	253	MDYIRLEVLTDCICRKCSMRATLYKLEQDAERLAAAASKSTVSQSKKKRVREVKRFATRLKAALDEGRIEDDIKGVKMEKVFSRASTKQAMVARASHPSIPFYYSASSDSPNQPPPVLALHLNRSVHFGAYASKNTARVHFPEVLDLTPYTTSGMLSTSPSIPISSHMPQPPPPPPPPPPLWRSRRRCRHPRPKHRPRACYTVSRRWCATTGNTRSDTTSASGASRAAQGASCRHGWTRDPLPRRRRDGAGCA	OBZ70483.1	5.7e-49	Ubiquitin carboxyl-terminal hydrolase 1 [Grifola frondosa]	No differential expression	Not secreted	NA	NA	NA	NA
Lactarius akahatsu	Lacaka1|MSTRG.12156	2504	254	MQQLFDPSKPHFTTWVRLHDVEHPVWRSDPITEPMATPLYYAALCGFHGLVEHLLIEYPQHVNARGGGRGAALHAASVRNHVKVAQVLLERGGDVDVRGAFQRSPLHFAAIERCPEIGRFLLDHGADVDSPQVDFRTPLHMAALNGYVEFSQMLLEHKADVNSRSNDGRVPLHRVSENSNEKGDYPGVVRLLLEHGADVDVKDRGDATPLHLASSREKTEIVCLLLNHGADVNAKDQEGKTPLALARGKDKIVH	OCH94796.1	5.1e-13	hypothetical protein OBBRIDRAFT_746651, partial [Obba rivulosa]	No differential expression	Not secreted	NA	NA	PF13857.7,PF13637.7,PF00023.31,PF12796.8,PF13606.7	Ank_5,Ank_4,Ank,Ank_2,Ank_3
Lactarius akahatsu	Lacaka1|MSTRG.3666	12022	254	MPSNGHTATRARVLTLYGTGKCYRNATTINTLTDNVLVEIFDFCRLGEDHVQLEYSSRTVWKWNLLVHVCRRWRQIIFASPRRLHLENLCTNGTPVGNDLGIWPDIPIVMRYGIRDTIPFDDEDNVIAALEHPGRLCCIGLHMTGSGSQLGRITAAMQGPFPVLTCLSISSLNANVPVIPSSFLAGVYRKSNYVGSRFQRCRRFFCRSVTSSHSDFATYPRLVTFYLSLWLHIWPRCPGSNSSKLNSTRIPCLP	NA	NA	NA	No differential expression	Not secreted	NA	NA	NA	NA
Lactarius akahatsu	Lacaka1|MSTRG.4765	8098	254	MILDRGFFPAAAACLETYGGYLFTNTVEHVERGLSKVDYLGMVDDKRVVLVEAKSPSVMKAVGDSLPEHTVELDWTPGGDLVSRVLLKVSTQSLDATPTLTIHLTDQAALYLGLREMEWLFLTSHNSCIVCRLVSDNDNPFLAFSRIFSIEGSSQPFRAFMSTILSVLNGAPVQASEFHPAVALDTVPEEGEGGSSSSPEDIDGSGEYRGRSTANISSTRPITHSRAATSHDAVESELMVRPIPGHLLSTGSLV	KIL57518.1	9.2e-39	hypothetical protein M378DRAFT_87758 [Amanita muscaria Koide BX008]	No differential expression	Not secreted	NA	NA	NA	NA
Lactarius akahatsu	Lacaka1|MSTRG.8316	15779	254	MINSSSMLATLAPPPPTAATGTWPRLARRGLKRPRGLWKARRRVDPTTTPTSSGCTPHGSPAPPTTETLSARAQSQSRSSWRGSDTDREEEGSGERESSTADNDGEADEDEDELMSEHSGSSKRQRRESADSCGSSVEMWAFYVDAAEAAPSTATITPCIPCAPPPQLVLETENAGRCEVGRDAQVLIQDMVTTSLAERASPSQLKEDSYGYEEWEGVKGTLRRASELYDGALLRRCWCVGAYRRGISHVYMLR	NA	NA	NA	No differential expression	Not secreted	NA	NA	NA	NA
Lactarius akahatsu	Lacaka1|MSTRG.10757	3106	256	SRPSSPLKHSNLSEDAILSAPDVIASPYSSELSRVYGSVLQPKESLESFHCHICSEQFTPDATIYPHPTDPTGERYLCRSCFSQNGGSRGNCVQCTRPVLLLKSEGGFVEKAGQVWHKKCFICSGCGKNIGDNPTVDLLGRPSCAECFDTCLDRRDSPGKFKTPTAKVDVDSLDQFNSTSTSTASRARKGSSTIEELEQVLGIRRSQSTPDTNHDRTLSPDVASAPLPSTSHSYPSSSPSPPVLGDGPNRPPRPLK	XP_009541231.1	5.4e-63	hypothetical protein HETIRDRAFT_378186 [Heterobasidion irregulare TC 32-1]	No differential expression	Not secreted	NA	NA	PF00412.23	LIM
Lactarius akahatsu	Lacaka1|MSTRG.9958	6964	256	MQRYYSMMSSRPPVSEDRRLLPPPVQSQPQNSVMAPRAPTISQPPGITRQSAPVQRRQQDIQTPLPRDSLVLPPAAPMQRRDSGYAGRAVIPRRPSLEREQRTILPPGLSTSPGAHSSISGQPPAPPAYTPGRPRRDSLTQQARRDSVSAAPQPPIQPGRRDSVSGPQPPPQSVHRNSVSAGPQPPLPVRRATDPLPASNPSPPVSARRSSDSAPRGQGLLVSTRVRFNDENLICPSPIPMHERRRGWHNRRGYVF	NA	NA	NA	No differential expression	Not secreted	NA	NA	NA	NA
Lactarius akahatsu	Lacaka1|MSTRG.6591	4210	257	PIPLDLLTLSNFIDPPTQRGTGLLRGFGGNKGGGDAQANTPGVTPDTATDSRVVYPCTILHTGRLGGLYTVYAESSQARSEWKEKLEEAIGLRKVVQESNRVFEVETLSSDTFVVPSMLSPPTNHSWNAESSFTGKVTCSVPFSKPIYLEIVYESLICFELPRMDVPSSQSVVRKVFGLGSATIPDVRIALLSCQIVAHPPFAAMRRVLHLKMVTQCAMLEDFGIFLVLADKVSFFPLRYQGDLIDARLLVTIRIPH	XP_007303972.1	4.3e-60	Dbl-like domain-containing protein [Stereum hirsutum FP-91666 SS1]	No differential expression	Not secreted	NA	NA	PF15405.7	PH_5
Lactarius akahatsu	Lacaka1|MSTRG.5817	6833	258	MTYINSYEKPEKPALLSGYFGPEPYDINWAFPLYEETLESERVKLTPFIPSLHAQEYAAQVGVRPELHRWFPLDLSSLDRLLTEVEVRVRRNPSWVLFAIIDKPHGGAMAGVIGLINASPENLSAEIGWVLVFPAFQRTYVTSNAIGIMLQYAFELPSPEPGPARSVRRGLGFRRVQWTAHSANKPSHAAATRMGLKEEGILRWTRVSHEGAEGHGIPLRTGDPLSPRPGQHSVLFALCADDWENGGREQVQRLIDRK	XP_007303559.1	1.2e-65	hypothetical protein STEHIDRAFT_168085 [Stereum hirsutum FP-91666 SS1]	No differential expression	Not secreted	NA	NA	PF13302.8	Acetyltransf_3
Lactarius akahatsu	Lacaka1|MSTRG.7131	2765	258	MRAIGTKHKISKVPEDSVNYVALALRARLQDLLVAMAAASTHRTESQFDRAPSTYADGSPMWRVSVRRDVAKQLAALERAEREDEMRIRRERKELAAAQAAALAAHAPGAAIGDAEDIDGGPKKKKKKADGPGVTAKNMSEDVRKKMSNAVASHAAGLSTGKYAWMNASNASSAPPPKPKPAASPTPATTTAPATTPATAAGGSTWARPYVPTSGKAPNSAKDEEDTRRVVTLRDALFVVEKERGHGAGRGAAHGWVR	RDB19918.1	3.7e-72	Transcription initiation factor TFIID subunit 4 [Hypsizygus marmoreus]	No differential expression	Not secreted	NA	NA	PF05236.15	TAF4
Lactarius akahatsu	Lacaka1|MSTRG.8190	1377	258	SNIFVAAQRGDLNLIRELIESGRARATDRDEQNITPLHWAAINAQVPACRYLLEQGAEVDALGGDLVATPMQWAARNGYLYVIQLLIAHGADPNIKDTQGYNTLHLVTHSSSIMPLLYLLHQPLSVDDRDSAGHTSLMWAAYQGDALSVDLLLKHGANPNSRDDSGLTPLHWAVVRGNKVCIRRLFEKGAEIHAKDNEGRTARDMAVELKSLGAWKRALEEGGFKEDGSKRKKPLSDVGAFTEWGLRGANVIAFPAEY	XP_009548516.1	3.3e-52	hypothetical protein HETIRDRAFT_477592 [Heterobasidion irregulare TC 32-1]	No differential expression	Not secreted	NA	NA	PF12796.8,PF13637.7,PF13857.7,PF00023.31,PF13606.7	Ank_2,Ank_4,Ank_5,Ank,Ank_3
Lactarius akahatsu	Lacaka1|MSTRG.9442	1074	258	SNIFVAAQRGDLNLIRELIESGRARATDRDEQNITPLHWAAINAQVPACRYLLEQGAEVDALGGDLVATPMQWAARNGYLYVIQLLIAHGADPNIKDTQGYNTLHLVTHSSSIMPLLYLLHQPLSVDDRDSAGHTSLMWAAYQGDALSVDLLLKHGANPNSRDDSGLTPLHWAVVRGNKVCIRRLFEKGAEIHAKDNEGRTARDMAVELKSLGAWKRALEEGGFKEDGSKRKKPLSDVGAFTEWGLRGANVIAFPAEY	XP_009548516.1	3.3e-52	hypothetical protein HETIRDRAFT_477592 [Heterobasidion irregulare TC 32-1]	No differential expression	Not secreted	NA	NA	PF12796.8,PF13637.7,PF13857.7,PF00023.31,PF13606.7	Ank_2,Ank_4,Ank_5,Ank,Ank_3
Lactarius akahatsu	Lacaka1|MSTRG.953	7151	258	MGFIGCIALMTLPLELIDHILSFLPWPFDLHPLLLVNQRLNSIAERVLYRNIGDLPAQRSVRLLLSLANAPAVRRGLVKALEVNFTENRVLFALELLIAKVLGLLPRLRVLNVEVSVHENRHRALAWIFPRDAPFQLRSFSTSIRCASPSCLVGLARVRSTVVFCFRFFYFLFACPLNRGVGLGPPTPRQTRSGFGRVPRVAARDPRPLAARHARVLVEPIHPPPFRAPAPRGIPLGARGPRHPLRGNATPRHAKGSG	NA	NA	NA	No differential expression	Not secreted	NA	NA	NA	NA
Lactarius akahatsu	Lacaka1|MSTRG.8327	5600	260	MALHALTQCAARLLLAQQAGDDVLRDDWRVYRALAELGMEERAQGGWCVSRLSPERAAQACSLFLIKGCKAPSPIVRCGRRHTGPSCRRLVLPPDPASQKKLAKLLKRPPLKDVADALFTYDGFLHGLGRNEPQCVMGAPSHLLLLTIDVDLEAHGGLYTLHSHLNHSCRPNVSVRHLDQRTALSRITLVAKRDIAAGEELLVTYVDPSLGVRKRRMQLGAWGFGECVCERCIEEEKETSKPSSDVDDLERELKAGLGVM	EMD30911.1	3.5e-62	hypothetical protein CERSUDRAFT_163648 [Gelatoporia subvermispora B]	No differential expression	Not secreted	NA	NA	PF00856.29	SET
Lactarius akahatsu	Lacaka1|MSTRG.8329	1527	260	SAEAPEDSVERPGDADHHTSDAFGRMMEKVHELERKRAEITERIRALPDFGDFLRAVPFEALHTAAACGPIVIINHCRYRCDILIVLHGSSPVHIPTGEDFYSRTIKLKEHLLSTRAKHALESNQYQHALRFVLEELYELVGRPVIEKLHELEIPEQSRVWWCPTSVLCSLPLHAAGPIESDGKRKRYFSDVYVSSYTPTLSALIESRKDITHTPDPPSLLIVAQPDVSLPGVWGEIEVVQKLAQSATTLLGPRARRSRA	OCB85922.1	3.7e-43	hypothetical protein A7U60_g7056 [Sanghuangporus baumii]	No differential expression	Not secreted	NA	NA	PF12770.8	CHAT
Lactarius akahatsu	Lacaka1|MSTRG.8954	11787	260	MADFFFDFRDTKKQHRCDLLSSLLFQLSARSDACHHIFSQFYLDHDEGVQQPSDVALSHCLTDMLKVPAQLPAYIIIDALDESPNISGTPTAREKVLQFWRTSSVTLPNVHICVSSRPEIDLRSILEPLAMFRVSLHDESGQMADISGHIKSFVHSDRNMRRWTVEDRQLVIGTLSEKARRDVSDSSRGFSGLSPNERGRFRWVYCLLDILHRCFPASIHSILDHLPETLDETYEHMLRRIDKVKRQFAHRLFQCPCGIS	OCH90532.1	3.3e-52	hypothetical protein OBBRIDRAFT_592935 [Obba rivulosa]	No differential expression	Not secreted	NA	NA	NA	NA
Lactarius akahatsu	Lacaka1|MSTRG.9613	4758	260	MNTTPRTNRMAKIFGLADDRFLQFTDTTNTSSDCKMFTSLRRSASQLFHSPPTVHQTSAAAHLGKRRQFILALDGPGIPQDPWAYPLSWSSTNVIAVACGHDVYYQDLDTRQIAHLCNLPRPSLGRIRALMFAPRGLYAALGTTTGCVQVWDAASQSRVRSWPNTDWMSVSALAWRPCSRVFAVGRADGRLALLDVRAPDEVHKFRGHKGEIYGTQWSHDERFMVSSDAHGTVHLWDARNMSTRVGKMKHESSVKVGRGH	XP_009548545.1	3e-93	hypothetical protein HETIRDRAFT_477611 [Heterobasidion irregulare TC 32-1]	No differential expression	Not secreted	NA	NA	PF12894.8,PF00400.33	ANAPC4_WD40,WD40
Lactarius akahatsu	Lacaka1|MSTRG.6592	7306	262	MPRTSSSLRYGSCPNGNFCRVLIRNGNTGAKRYITRRDEERVSKFKMNITLAFQVLQVIILIPWALYVWIKDSRFGSQPECNHFVKYVFFFVTVRATVGWLRILAFVGLAACAVGLVFVLVMALKLQKLIEDIFRRESQASAENPSGPLGFVSDALDGVSRRLRSASDGLAGVPLVGPVLGLYATAAAASGTVVKAFSKLFPDPNMGVKQKLKHLKAKWEKRIKRVGRVFWVSSILCVSSVLPSNDSTNSTLATPEPRSTVS	XP_009541898.1	1.6e-09	hypothetical protein HETIRDRAFT_443382 [Heterobasidion irregulare TC 32-1]	No differential expression	Not secreted	NA	NA	NA	NA
Lactarius akahatsu	Lacaka1|MSTRG.7128	7341	262	MSSDTIQASPYHVVIVGAGIAGSALAHALSAAASTSRTAPLRIALLERSLAEPDRIVGELLQPGGVAALRSLGLGACLDDIDAIPVHGYAVLDAGDTVHIPYPDRAEGRSFHHGRFVQKLRAHASAAPGVDVLEATVTDLIECPLTHRVLGVQARREGAERKESFYADLVIIADGCFSNFRSTVMGGNPRCKPVVRGNFVGAVLEDVTLPIPQHGTVALIKGHGPVLLYQIGQHDTRILIDIKNPLPSDLKVRNRVYFCVSH	KZT21548.1	1.6e-94	squalene monooxygenase [Neolentinus lepideus HHB14362 ss-1]	No differential expression	Not secreted	NA	NA	PF08491.11,PF01266.25	SE,DAO
Lactarius akahatsu	Lacaka1|MSTRG.10040	2461	263	MVLQTLPVSERARQLETINDDIEAVLIQTFLPDLYSVIAAFVLKSNHFVDIDGRIFVAILHCATSGDHLPTHALEALVGPEISSRLETVWKSTNAPPPDLSKLLVYRPTHENSESESSSTASDEEDTSFMLLPFHNEVFNDELVAVHVTVADQGQALSSPRLEFSQNIPFSDTKNWHANHRTILPKHQGGEAANIGERARRKQLKRDQRFMSQMQRLATTLTGASGKTLQQILIPPTGRKVSEIVDDPSLGGPKRGKKVGPIM	KZV68765.1	5e-40	P-loop containing nucleoside triphosphate hydrolase protein [Peniophora sp. CONT]	No differential expression	Not secreted	NA	NA	NA	NA
Lactarius akahatsu	Lacaka1|MSTRG.4310	2404	263	MDDLFDSSKPHFAAWLRVHDIDERWNYFSHVQTQGVGSPLYYAAFCGFYDLADRLIMKHPEQINASGGRLLAPLTAALYKRHFDVANLLHKHVAIVDARGHKERTPLYSASVDGCVDIMRWLLNHGADPNARRNTGWTPLHIAAAHSEPEAVQVLLNHNADVNSRTDDCGTPLYDTIFYLRHRPVEEKVGIVQQLLEHRADPNARDDNHLTPLHYIKLPPRGYSSSLRCYSVTERTQMRGMGRAGHHSKSLLKTDTTKLRNCC	OCH87556.1	2.4e-10	hypothetical protein OBBRIDRAFT_735932, partial [Obba rivulosa]	No differential expression	Not secreted	NA	NA	PF13637.7,PF12796.8,PF13857.7,PF00023.31,PF13606.7	Ank_4,Ank_2,Ank_5,Ank,Ank_3
Lactarius akahatsu	Lacaka1|MSTRG.6917	4304	264	AKGKKRKGEDFDPNDPNAPKSKKAKAAAKVTKGRFKGPFDPDRHCGVINDKNLPCSRSLTCKSHSMGAKRAVKGRSKDYDELLLEWNRAHNPNWVEPVKRESKKERKEKKEREKRERKQRELEELAKRKGIDLSKPGAEAQLEQLKSSTKKKKKVEHSAIATGGANAHASGNNARADDEHGAENLADLDSEEELDSMTKSVRLASEASLLGVPLAIPSDAGSWFVVRRERLRTCRDLFAGALMKGGASSIGAAGAAARLGSGAG	XP_009549391.1	4.1e-74	hypothetical protein HETIRDRAFT_453614 [Heterobasidion irregulare TC 32-1]	No differential expression	Not secreted	NA	NA	PF08313.13	SCA7
Lactarius akahatsu	Lacaka1|MSTRG.6891	3812	266	MCSTAPMATLIRSTKPGSDWKSNELLAYNITVTSQDVATFFGNPTLPPSSLHRVILENEIYPPGGIADRDDRKFFFYLEPAMRNPPAEGIVEEFAAHLLGLLGYDDIVAGGRICRQKHIPLFMCGGYTHAKSNVCVANRNGKIFLLVQEQEEEEGVDPEAQLIAQAIAAFQYNNRLLLRIGKEPIRAKTIPGIITLGTTPTFYKINVTQDLVDAMETAQYPEDPTTVHRLVPPVDDLDGLGRDGMQPLNNRAVILGLFEAFKQFVD	KIM50871.1	2.6e-76	hypothetical protein SCLCIDRAFT_750175 [Scleroderma citrinum Foug A]	No differential expression	Not secreted	NA	NA	NA	NA
Lactarius akahatsu	Lacaka1|MSTRG.9959	5067	266	MIGHFNVGGFFPNRVLPNRQITMVILTTQKVRMFPVPRWMVITYTVDLLHDLFLLYPRMEQMFLGNIREADFGECLKGPEFQFKKKRMMFFRLLDSDLRNAKSLSADLTRSVADAVLSQQDENSALAILDTFEKDDKGNLSQLRGLFRFSREEGLWENAKTHASSVSDSQFLSELQTVPIDDYLRDVAVDVEDTAYALFTERVEALVSRIDQELVAQTLECYEQIQREVDIEEARAVHDLWTKFFRQVKDLSIQRTTPYVCYGVQN	NA	NA	NA	No differential expression	Not secreted	NA	NA	NA	NA
Lactarius akahatsu	Lacaka1|MSTRG.10287	2936	267	MAPTSTSEVAFGLRHLPVSAKLPTLGRGDVVRVIRSLDELGIRYIRFQWVDYTNISRSRIIPLPAFSELLGASRPGLGIGRASFGIAGSSLAPGFSPTGECLHTPDLSSIRLCGYAPGHASLMGWFEEKLPIQKQVGGDALEMSLCPRGLLKGIVKCVVHMSTPLTNLTERFVFSKGHALGVEFLVGFETEFVLLKTTQPIRAVNDATWSASCAFSPGSDAAECLEEIADALRTGEIELVMYHSKAAPGQVRDFSVMDGVCGADMNR	KZV65288.1	6.2e-54	glutamine synthetase/guanido kinase [Peniophora sp. CONT]	No differential expression	Not secreted	NA	NA	NA	NA
Lactarius akahatsu	Lacaka1|MSTRG.6904	8429	267	MPQGTPTIKVRNVARLGAKVVLHGVDFDEAKAECARLATTHGLVFVPPYDDPLVIAGQGTVGMEILKQVPGAEHLDAIFGAVGGGGLVAGICEYVKRIGSPHIRVLGAETFDGDAMARSLDKGERVLLSEVGPFSDGTAVRIVGEEPFRICQKLLDGVVKVDNDEICAAIKDIFEGTPPRCSPHSSSLSHHHVETRSVTEPAGALALAGLKRYILDNQLIGAEKKFVVVISGANMNFDRLRFVAERAALGEGREALLSIDIPERPGR	XP_009547468.1	6.1e-118	hypothetical protein HETIRDRAFT_459408 [Heterobasidion irregulare TC 32-1]	No differential expression	Not secreted	NA	NA	PF00291.26	PALP
Lactarius akahatsu	Lacaka1|MSTRG.7040	2873	267	MMCLVHFQIHGHKVIPLVSNANVLTITCLISLQIGGATALIGDPSGRSAERPHMEEAMAQNNMLKLSAAVQKFFERAGDYAGKRVSSLDESYIPPLVMNNIDWFKNLGVLEFLRVAGANARVNSMIARERQVQSVQHFVYADWSFPSVQSRLNSQQGISFAEFSYQLLQAYDFLALHERTGCTIQIGGSDQWGNIIAGLELIGRTNELSNRAAESRERAFGITTPLLTTATGAKFGKSAGNAIWLNEKLTSVYDFYQVSGDKFASAP	XP_009547475.1	2.3e-77	hypothetical protein HETIRDRAFT_319562 [Heterobasidion irregulare TC 32-1]	No differential expression	Not secreted	NA	NA	PF00579.26	tRNA-synt_1b
Lactarius akahatsu	Lacaka1|MSTRG.8986	8807	267	MTPVLIDQSSEHVAYWCANQLGLSSSASASRDIALTNNPDRGAPPVTLRVLGPARRSIVWLLHDFPRWGLEGSAWEEIVVELVGWSTCQTLWHLAATPHPPSDPRISPFTSGESPTPFYRRQSPNTTHFFPRNDSPSRPKRGQAVTTRSFRTPRARGRVGIASSRGDFWKSDRCARGHAAVQVAIRRDDRDHGSHRETQGCDNVSWEGGAELEAIECRLHAMPDKTASSVWSGILGGVYPLSCALRSRRRHTCWIAMQPVLQHGTTR	NA	NA	NA	No differential expression	Not secreted	NA	NA	NA	NA
Lactarius akahatsu	Lacaka1|MSTRG.1039	8314	268	MVASLATLPRLEILVIGFQLATSRPDQILPPPVTRIVLPALISFRFRGASEYLEDLVGRIDGPQLNQISTVYLNQVVDFQVAQFTMFVDRSVGPKIALFRHARFSFSRDSVTFTMCPHANDSPWDRRPVRTIISCQGIDWQVSHIAQVVSQISATLVNVVHLKFTELWGCRFEGTDDVEWVHLLRQFSAVQTLHVSKGLAGHIALALEDITRGMVDEVLPSLDLIYLADQPTSSIEKLVAARRLSGRSVTVIDTETEFDERLESYANE	NA	NA	NA	No differential expression	Not secreted	NA	NA	NA	NA
Lactarius akahatsu	Lacaka1|MSTRG.4303	3956	269	MNDLFDSSKPHFAAWLRVHDIDEDWDYFSPHEGPQGVGSPLYYAAFCGFYDLAERLIMEHPEQVNAGGGRILAPLPAALYREHFSVANLLRRHGAVVDVRGQYKRTPLYTASIHGRVDTMQWLLNYSADANTRHFYRRTPLHAAALWMHLEAVQVLLEHNADVNSQCSEGRTPLHDTISYFSYHPERKRVGVVQRLLEHGADPNARDHNHSTPLHGASSKGFVEVARLLLGYGANIDEKDGNGKTPFQVASGKRHDEITKLLLAHGAVP	OCH87556.1	2.9e-11	hypothetical protein OBBRIDRAFT_735932, partial [Obba rivulosa]	No differential expression	Not secreted	NA	NA	PF12796.8,PF13637.7,PF13857.7,PF13606.7,PF00023.31	Ank_2,Ank_4,Ank_5,Ank_3,Ank
Lactarius akahatsu	Lacaka1|MSTRG.10634	2266	270	LGAFDSYRADGVGWCPKCAWLLSLESPHHRWRLICHRDHTQGWCGQPPWRRQCRNQNLTSAAETKTRNTEFPAAGRRQQHPVRNRDEPERTPDSAILIAPTAHIATHLLEAQRPVLDIFARCTPGGVSTLPESASLESEQLWDGYGNWSTARWSSFDDECQLGFERWPERPRRTIGRSRRRSPERGWGYCSLGLGSSRRRLRWFTLAMSMCGIISLFTFRLEGTTNEHHSTPPWTHIPRARISKYRFFVLICFMGDMGLRVFELCRMSAI	NA	NA	NA	No differential expression	Not secreted	NA	NA	NA	NA
Lactarius akahatsu	Lacaka1|MSTRG.4302	5175	270	MDDLFDSSKPHFAAWLRVHDMDKDWDFFSHRPPQGDGSPLYYVALCGFYDLAERLIMKHPERVNESGGRIVAPLPAALYGGHFDVANLLHKHGAVVDVRGNRKRTPLYTASIDGRIDIMRWLLNHGADPHARRDDSWTPLHIAAIDMQLEAVQVLLEYNADVNLRRDDGRTPLHDTISRFEHHPEGKRVDVVQRLLEHGADPNACDHNHSTPLHEASSKGLLKVVQVLLSYGANVDEKDGEGRTPFQVALSKGQHEMTKLLLAHGAVAQP	OCH87556.1	4.3e-10	hypothetical protein OBBRIDRAFT_735932, partial [Obba rivulosa]	No differential expression	Not secreted	NA	I32	PF13637.7,PF13857.7,PF12796.8,PF13606.7,PF00023.31	Ank_4,Ank_5,Ank_2,Ank_3,Ank
Lactarius akahatsu	Lacaka1|MSTRG.6000	13605	270	MTLFADRPGILSATLLLPSALVYFLFPPHESGTPLPSGGAPSSPHTSPTLLRAPSFHGDDTAAAAAPTAVDEPATTRLAALSTYRAHMMLVTILAILAVDFPVFPRALAKCETYGVSLVRPFFRFLFDRCCRLREMPRLDGHGRRRVCVFTGYRVRHPARQSPAARESAPCVGDRVGRREMRAGPGARSGPRGAGQRYAVSGGSSASTLKGPLIKDGEQEHVTEYGVHWNFFLTLALVPVLRVFLHPLFTTVPISLLGLLVALGTYRRCT	XP_009551088.1	1.2e-28	hypothetical protein HETIRDRAFT_480289 [Heterobasidion irregulare TC 32-1]	No differential expression	Not secreted	NA	NA	NA	NA
Lactarius akahatsu	Lacaka1|MSTRG.8335	6528	270	MLSAGRRSLSRSSSPAPSPTPPNHDTLLHAYGLLEVSLSHYFPGTVESDDASVRATAKAESESTLDELLAPLVMLLLKLVTGDTGARDRVREWLLPPNLDRTVVLESRADTLGRLLRLLTSVYHTRLNSMSGELLYAVCNHDGTPLCCQTPPFCPLSSLSLVTNVVLNLAMQLISQVGYGNVAGFLFNKGVVTGPPTSGGASGSADLSGAQINPITGAIQEERPDIEMTEEEREHEAEKLFVLFDRLERSGAVPQDANPVRRAIQRSFAS	XP_009544259.1	6.5e-67	hypothetical protein HETIRDRAFT_433377 [Heterobasidion irregulare TC 32-1]	No differential expression	Not secreted	NA	NA	PF10165.10	Ric8
Lactarius akahatsu	Lacaka1|MSTRG.8790	3530	270	MYDRGNVKQAVKNRIVVKPIYWTRIGLPAQDEIPGVALEVINYHRALLGTFHAKFLVVDRRVACLNSNNIQDRPNIEMMIQLEGPVVESFYDMALMSWANAMNPPLPLLAMRPASPSVYRFKQDNEDMKCALPFGNLIFPRSLRLRADLGSEPMLTALRAHFQEWRVVKNAQFDAPPQPRRTSVTGSVTANHRDALFKQPQVRVPSPPKSADARDHGIFDTLPEGCVRDEAVERHRHISTPSWTESVKTNTDGYGDVDVPPLTIRKHLTV	KZS91256.1	3.7e-46	hypothetical protein SISNIDRAFT_517221, partial [Sistotremastrum niveocremeum HHB9708]	No differential expression	Not secreted	NA	NA	NA	NA
Lactarius akahatsu	Lacaka1|MSTRG.9572	11909	270	MTSIYVDEAAGSDLAGAGSQTTPYQTLAHALFTHGQAADVLVRKDPSAEYEQPTQSALKKAKKGADGLEKKRRKAEELAEAATEEREKRERLLEESKKVQLIEDDTLPAAIKARTVVLSAACFLHVNDGSQAKILNLEPYRGKRVRIFGWVHRLRSQKDIIFLVLRDGTGYLQTILSGVPVRDLFYSFVQPGLPLTHEQAQTYAALTLTLESTVELVGTLQPTPEGKTAPGGHELVVDFWRTIGAAPGGDDAFTNRLNEVHLVPPLSPGH	XP_009553289.1	1.3e-70	hypothetical protein HETIRDRAFT_157725 [Heterobasidion irregulare TC 32-1]	No differential expression	Not secreted	NA	NA	PF01336.26	tRNA_anti-codon
Lactarius akahatsu	Lacaka1|MSTRG.6796	7598	271	MDDLFDSSKPHFAAWLRVNDMDESWSSFSHSERWAVGSPLYYAALCGLYDLVERLIVKHPQQVNAGGGRVVAPLPAALRKGHFGVANLLHKHGAVVDVRGDGERTPLYTASANDRVDIMQWLLDCGADPNASNDTGCTPLHLAAAHLQLETILLLLEHKADVNPRDSDGVTPLHDTMFNLPSLLPEGQCIDVMQRLLEHGADPNACDNNHLTPLHTASSKGLLEVARVLLSHGANVVEKDGKGRTPFQVASSNGHDEMTKLLLEHGAVAQP	OCH87556.1	3.3e-10	hypothetical protein OBBRIDRAFT_735932, partial [Obba rivulosa]	No differential expression	Not secreted	NA	NA	PF12796.8,PF13637.7,PF13857.7,PF13606.7,PF00023.31	Ank_2,Ank_4,Ank_5,Ank_3,Ank
Lactarius akahatsu	Lacaka1|MSTRG.9471	7170	271	MRASDQTKDQTYYLSSIPESSLDMALFPLADVSKTQVREIARAGRLHNASREESMGLCFIGERRRFNDFLGTSAISDLIGFHETLLSCVFTGDYVAPRPGPILAIDTNVELGQHNGLWTYTIGQGSGLPGLTRKLFVAAKDHEKNAIYVALAEFVPLHFLPLPVHLMSHFVATLRCLPPASPPTTSGGYGEMSPHRPPFHATASVQVCKSVIACPPSPSGYASGGQATRCILRSTSRIKRLLKARLPFSMTVITVWAAGPLTKLRTSHKFS	XP_007300483.1	5.6e-34	tRNA methyltransferase [Stereum hirsutum FP-91666 SS1]	No differential expression	Not secreted	NA	NA	PF03054.17	tRNA_Me_trans
Lactarius akahatsu	Lacaka1|MSTRG.11393	2754	272	MELAVDGGGESGDEIPECRVILSVRPLGSPPPIHYLTYWLQIDVQVDNHHLLDHIEWDLRSGLTPEEFTHQLCLDLGLAGEAEPLIAHAVHEELMKHKKDAIEWGVIGGFPMEQAASAEDGSKDKSALGVMKDKTGLGLGWGRTPKEGRGPRILRSVWRDWAEAEEFKTRWEMLSHEEVERREIERERASRCVARFCFLYHRLITDDWVLADGYGERHRSFRVRPGRKGYDTSSGLQSGATFHIVLSFFLSCDFPARARKLLLTLSQCKTLS	XP_009546459.1	8.5e-67	hypothetical protein HETIRDRAFT_417918 [Heterobasidion irregulare TC 32-1]	No differential expression	Not secreted	NA	NA	PF04855.13	SNF5
Lactarius akahatsu	Lacaka1|MSTRG.2640	1073	272	MVSHMFGRVYVGLTFSCSHGIHVSRRTFTELGTAASISPSRALLVAPASPKPNETSVEISVVYYRTGYAPVDYACPADYATRALLERSRAAQCPSLALQLAGGKKVQEVLTRPGVLERFLAPSEGAESVRESWVRMWALDEGPDGEGADEAVRRARELVLKPQREGGGNNIYRDKIPQFVAQLPERERAAWIAMELIRPPRGVGAHLVRSGAGRVSASVVSELGVFGWALFVEGREVKEEQAGWLVRTKAEDVDEGGVAAGFGVLDSVVLVD	XP_009545865.1	6.5e-83	glutathione synthase [Heterobasidion irregulare TC 32-1]	No differential expression	Not secreted	NA	NA	PF03917.18,PF03199.16	GSH_synth_ATP,GSH_synthase
Lactarius akahatsu	Lacaka1|MSTRG.10569	6466	273	MSSASALFQPLRVGTTDLQHRVVMAPLTRLRANKDHVHGELAKTYYAQRSSVPGTLIISEATFIAPQAAGYANVPGIWNGAQIAGWKTVCVSPSPSFTVCTNFPRKITDAVHANGSYIFLQLAAPGRTADPAILRQEGGFDVVAPSPIPLGGHSGEEGPVVPRALTTAEIKEYAQLYSKAASNAIEAGFDGVEVHAANGSLLDQFLQTVSNERTDEYGGSVDNRVRFPLEAINAIVRTIGAERTAVRISPWSKFQGEEDLSRSPSFRVSNAAL	KII86958.1	3.8e-75	hypothetical protein PLICRDRAFT_114056 [Plicaturopsis crispa FD-325 SS-3]	No differential expression	Not secreted	NA	NA	PF00724.21	Oxidored_FMN
Lactarius akahatsu	Lacaka1|MSTRG.3117	1381	273	TDRAPNVSAVPLIQAFDPTSESYAHGNQKTESTKKSILHYLKMIPRVPQVQLVGNGTLSDHEGLETVELKHPSHRTFHKTVVSPEDEARGATRFCRWHMDAALYDLLPPKVTTLYALRVPQGPQQVCRYDDGTGDELPIPLGATAFVSGRTMFDILPRPLQSVAVRARVRYAPHPYVWMGPVAAHSTGLALESEGKEVSLDQLPPWTEDKIQVLPAVCALSMAYEASDDCGPRVDVEEPRDGRAALPSTSLCRAGAVRRPAARGRVARGCAVP	RDB19383.1	1.3e-83	hypothetical protein Hypma_013451 [Hypsizygus marmoreus]	No differential expression	Not secreted	NA	NA	PF02668.17	TauD
Lactarius akahatsu	Lacaka1|MSTRG.5312	1580	273	MWEWQRLVHVCRRWRHIIFASPRRLDLHLFCTYGTSVRNNLNCWPAFPIIVDYYPYWDPDSGQSLAPDNDDNVVAALEYPDRVRCIEIAATGSLLEKVARVMQDPFPALTLLRLSSNDGDVPVLPSAFLGGSAPRLQEICLDGIPFLTLPTLLLSTSDLVILKLDNIPNAGYISSEEMVTCLSALTKLRTLSIGFRLPTSHSDQTISRPGPQARAVLPALAFLISVAPASTWKTSLPKSTLLYSTTSELRTSIGSPLIFPNFPSSSVARKASS	NA	NA	NA	No differential expression	Not secreted	NA	NA	NA	NA
Lactarius akahatsu	Lacaka1|MSTRG.5842	4441	273	MIRESSAISKCISLTSHSLAFYGWPVSQCQSATTPLLVQLNCGIRLLDIRLAKKQGRLLVYHGQYPQRTTFQSILADLHTFLISPTSARETIVVSIKQEDYDTHSPANFSALVRDEIEASPGGMGMWYLENRIPTLGEVRGKAIMFSRFGGDGAAWENGLEGMGIHPTNWPDSAKEAFSWTCKDVLVRTQDWCVVILPYTLANSLNHGIVGITSPPSFPSPKRRSFPPAFSCPLLLVSPNPFCLSHTSLLLPSPSLHLRLSRLALVGRAWLRR	PCH38410.1	8.5e-67	PLC-like phosphodiesterase [Wolfiporia cocos MD-104 SS10]	No differential expression	Not secreted	NA	NA	NA	NA
Lactarius akahatsu	Lacaka1|MSTRG.888	1333	273	MEWHPYLSGEDQDGLLPPSSPPIIQPSSPLTVLDRSEDDPPTMRASSGSPLSSPPESPTPAPHSLVFSLAPGLVLNNRCLEAGGSEDSFIPSSPIRSRDDMRRKAQKKRDEERDARTKQAQEQEQQSRTIAFKECLDILSANKLTFAELTEYVFFHENQTPDWRYENFFINRGLVTRLLDFFVSSKVNKTCREDVRDWAESVVLQTIKKEVNTVTQSGDLRITEREIDSSFASGLSFDELKAMVRQHCPIFLRLLVNIITTGRQARSVSKDRL	OJT13438.1	4.9e-14	hypothetical protein TRAPUB_10009 [Trametes pubescens]	Induced during mycorrhization	Not secreted	NA	NA	NA	NA
Lactarius akahatsu	Lacaka1|MSTRG.4710	2500	274	MDDLFDSAKPHFSAWLRVHNMDKNPSGADWFRFTDDSPRAGSPLYYSALCGFYDLSERLIMEHPEQVNARCGHMRAPLPAALSKRYFGVADLLRKHGAIVDVRGHVGRTSLHVVSMNGHVDIMRWLLNHGADPNARNEGRRTPLHVAALNMRLDAVQVLLDHNADVNSRSGDDTTPLHDAISYNNRHPDGKRVGIVQRLLEHGAEPNACDDNHSTPLHQASSKGFLEVARALLVYGANVDEKDQEGRTPFELTSSKGHHDMTKLLSEYGDVTQP	NA	NA	NA	No differential expression	Not secreted	NA	NA	PF13857.7,PF13637.7,PF12796.8,PF00023.31,PF13606.7	Ank_5,Ank_4,Ank_2,Ank,Ank_3
Lactarius akahatsu	Lacaka1|MSTRG.5151	6255	274	MTDPSYRGQILVFTTPLIGNYGVPHNITPRDTHDVGVVLESSGVQCAAVVVADVAEKFSHYTAIESLHSWCTRYNVPGLTGVDTRAITRLLRDQGTTLGRLAVGSDAALPPPAQADYWDPSTENLVDQISTKEPYVHNPSGDVRIALLDFGAKANILRALVRRGAAVTVLPWDYDFNAIRDSFDGLFLSNGPGDPQQCWVAGHKLRPVLEEWRKPIFGICMGHQIIGMAAGLDAYRMTFGNRGHNQPVLALASSGSIQAGRVYVTRFVLAPLVP	XP_009547275.1	2.5e-127	hypothetical protein HETIRDRAFT_385108 [Heterobasidion irregulare TC 32-1]	No differential expression	Not secreted	NA	C26	PF00988.23,PF00117.29	CPSase_sm_chain,GATase
Lactarius akahatsu	Lacaka1|MSTRG.8088	2192	274	MDDLFDNSKPYFAAWLRVYDIDEDWDVFSHVLPQPQSVGSPLYYAALCGFYDLAKRLIMKHPEQVNAGGGRILAPLPAALYKGHFGITDLLHKYGAVVDVRGQFSGTPLHVVSGDGRVDIMRWLLNHRADVNARNNGSWTPLHWAVADMQLEAVQVLIEHKADVNSQSAKDGTTPLHHILSPPFNYDAEEKMVGVVQRLLEYGAHPNARDHNSSTPLHQASSRGFLEVARVLLNYGANVDEKDRGGMTPFQVALSKGHHEMTKLLLEYGAVAQP	OCH87556.1	6.7e-11	hypothetical protein OBBRIDRAFT_735932, partial [Obba rivulosa]	No differential expression	Not secreted	NA	NA	PF13637.7,PF13857.7,PF12796.8,PF13606.7,PF00023.31	Ank_4,Ank_5,Ank_2,Ank_3,Ank
Lactarius akahatsu	Lacaka1|MSTRG.5334	1312	275	MEWHPYLSGEDQDGLLPPSSPPIIQPSSPLTVLDRSEDDPPTMRASSGSPLSSPPESPTPAPHSLVFSLAPGLVLNNRCLEAGGSEDSFIPSSPIRSRDDMRRKAQKKRDEERDARTKQAQEQEQQSRTIAFKECLDILSANKLTFAELTEYVFFHENQTPDWRYENFFINRGLVTRLLDFFVSSKVNKTCREDVRDWAESVVLQTIKKEVNTVTQSGDLRITEREIDSSFASGLSFDELKAMVRQHCPIFLRLLVNIITTGRQARSVSKDRLTA	OJT13438.1	5e-14	hypothetical protein TRAPUB_10009 [Trametes pubescens]	No differential expression	Not secreted	NA	NA	NA	NA
Lactarius akahatsu	Lacaka1|MSTRG.8684	2465	276	MRTPRASGTLFRCGVKRRGGSEGSELECTRAVERRRLSRTGNYTIHGGPELLAAHVTHTFPSAFQVLLPERDLPVSTADRKNVSGEAPRDAPHDVRELSRRRAGTGRCAHRRVERGLGPRGARRVFCPHEHGLVLCVVVVSDTQRTQRRRDRQLTCDAVAMYERGSPMFGAQATSRTQSAWPSSTSSSTHACVSSENPQILTMLSHPALAKRFAGAGRRPPALGARSEPARAAGAHDTALHPMACASNTSAPHWPSSTRACELRSLGGGRGRTAHL	NA	NA	NA	No differential expression	Not secreted	NA	NA	NA	NA
Lactarius akahatsu	Lacaka1|MSTRG.9820	4693	277	MMRLRRVYETAEEENRPVEEVAIERFGSLEAFDQANEERRILDGRGRGRDTTKGKRREDPGYSKVGEKGFIFNDLGGSGGSSRSSSFRRPGGPGESAPSTPSSQPGVPSAARARFDSLHLPSQTGTPGQQVRTPIPSVMTPQPGGKRSLSPSSLNRLQAKVLRAKLTGGPDAEKLEKEYEEELQRASGINTDEDGVQVRTRVEVLPTLDVRGKLYDVGHGKDDDRALPGNRKKKEKVRSSRSNAIRIGSLMVFARWRLAIQRQERSSGTTLMMTPLH	XP_009546176.1	6.2e-65	hypothetical protein HETIRDRAFT_474963 [Heterobasidion irregulare TC 32-1]	No differential expression	Not secreted	NA	NA	NA	NA
Lactarius akahatsu	Lacaka1|MSTRG.3604	1367	278	MQKSVEETALNSPSEIDTRAFMWTFDSLDEDHELERFFSGLPGFRGSKVVNDPLPRLTREQKWKLSTALMRLLDVTFSSDLLPDHVKDRRAIICAKAFDPAHIPEASGVLTKILSRYQYNGPMTAEIVQVMGGWGNDWGNDIRLVATVCKTVARVKKRNEPWFTLASLVLGTQELVLRYYATHGDSLSLAVLIHITRQQFSRFWDRRWPDSEFSKVLEAASKFNVQDTLPELRHEFCALWNQVRSNDKRRMAGHILKPIRNVYIALHQDTDSAPIGAD	NA	NA	NA	No differential expression	Not secreted	NA	NA	NA	NA
Lactarius akahatsu	Lacaka1|MSTRG.4748	1653	278	PLMLAVKRENAAITRTILEFGISPAILLLRDADGSTPLHVAVQNADTALAEVLLKHGPTQLLYTENSVGQTPLDIASLKGLPRVTGSMGVPRATDLPVNVEHYLHVSQRSPPFDVVKQKTEIPKLRATLDMLLADGLLADGSKVTTELLAFAGRMEERLAVETARKDEAERQAGKGEEKLEPGTTARTYFALRDAAAARPGTRQLVHLADVQRSVQQNLAQQDEGTLVRWSERSRVVNKEDKEGDPEVQRIGELKARSLFFQRIIGYGRVDVYGEDRL	XP_009544330.1	1.7e-30	hypothetical protein HETIRDRAFT_458314 [Heterobasidion irregulare TC 32-1]	No differential expression	Not secreted	NA	NA	PF12796.8,PF13606.7,PF00023.31,PF13857.7,PF13637.7	Ank_2,Ank_3,Ank,Ank_5,Ank_4
Lactarius akahatsu	Lacaka1|MSTRG.9705	4310	278	MPRRSPSPGSSKRRNDFEDRDRYRSHRGADGEPRDDYRDRDGKVSDRDRRRDYDDDNYYRRRRDGGGDGDGDRRRRRDDYDNGRRRRDDDRDGRRTDDDYRSRREDYRDRNRDRGDRPLRDGHDRRERDEVRGGSARRSASPRRSRPQSRSHSVSVPPPEDKAKPNFAPSGLLAAATNTVKNADGTSTLLKYNEPPEARKPLVGWRLYVFKGDEQLGASRLILSLAAHAPDRMSCFVYAELLHIQRQSAYLIGRDRTVADIPLEHPSCSKQHAVIQCV	KII90813.1	1.2e-36	hypothetical protein PLICRDRAFT_137293, partial [Plicaturopsis crispa FD-325 SS-3]	No differential expression	Not secreted	NA	NA	NA	NA
Lactarius akahatsu	Lacaka1|MSTRG.12720	5095	279	MIWCVLAAVVLHEMDYRYQDQAKGIDRPSFAATVIKNQGKYRLSEREQAWLVGNMLYVPKLVSPNTHKGSKGFANCSSAGGETMSTTLHWWLLALLAHPEVQSRAYAELDEVVGCAHPPTLADLPSLPYIRAMVKEALRWSPTVPFGVPHASSADDWYEGMFIPKGTIILPNMRVINFDTAVFGADSARFNPARYLDEKGQVKVLMEGREEGHMTFGYGRRVCPGRLVAEGTLGIDFATLLWAMRFERSEAAEGELDVNTLVHSGIGAYVFLLASSLGP	XP_009549684.1	3.7e-57	cytochrome P450 monooxygenase 25 [Heterobasidion irregulare TC 32-1]	No differential expression	Not secreted	NA	NA	PF00067.23	p450
Lactarius akahatsu	Lacaka1|MSTRG.6673	6665	279	MALALVEAGARAVYCVDLPGRPGDGWVKVAEYVRRMVADNNGEVTGRLEYVCADVRDQKAMWKVGEEIGEREGRMDVCVAAAGISTSDMDCLEYPADQFEQVRDLVRCMIVKELKFLFLFSFDGMCVILIQVISVNTNGVLYTAQAAGRQMARFGNGGSIILIASMSGSITNKVRCFLTQYTLGVARGRRADPNIIIGSRVRVLQHEQIGSIADGTEHGVRAWAEAHTGQHTLPRVHLHFVSVFLSSSVRLKSRCGEPGLSPGDGRLLVGVCSGTTAQL	OSD02841.1	3.5e-47	sorbose reductase sou1 [Trametes coccinea BRFM310]	No differential expression	Not secreted	NA	NA	PF13561.7,PF00106.26	adh_short_C2,adh_short
Lactarius akahatsu	Lacaka1|MSTRG.8879	2644	279	MAFKTLSKSEKSYIQASLQAQQPLRGDGRSLHQFRSVTLQTGVAPIANGSALLNLGRSSDESIGGTEILAAAKLEVEDIGPGSSGVEGGRVACVVSWCVQPSPLLARNNLLTSVRAKKSSPAAYSYLPAAALDDLQHDYSTVLHAVFSHASLRPPSLGIIPGRKAWLLTLDLMVLSDAGNVYDALFMAARAALWDTHVPRTRAVEYRRGIGGKAKDDNDMDVDPESHSGLDTRSKPLATDFELEDSWDEGPVLGGRDAWPVCITLNLVPPLFSLLSIII	PSR77084.1	1.7e-78	hypothetical protein PHLCEN_2v8073 [Phlebia centrifuga]	No differential expression	Not secreted	NA	NA	PF01138.22	RNase_PH
Lactarius akahatsu	Lacaka1|MSTRG.11478	10369	280	MGNSASSGTHNPSVTNNPQDRDNREKPLPPPVHRSLRTKKRSLELPDLASLSLTPAPSHLNSPNHSPRPHYRRPKASSPIPIPSQSPATNGADHYHQSHPRPQLPSTTQMPDVLVQQQPHHPIPVFPPAQRHRSTPNASTRSFSRHSQANHLQPIRDVEPPPGPDTKVVSFFPETIHSTIPLGLAQADIPQPPTRNRLSPIDEPPHPVDMKISWHGGGKTVFLARAGDTNWKGRQLMERRCARIYFRFFCHHCPDLTLTIAHRSQKPSPPPSRSYLAPIT	XP_007304710.1	7.2e-37	hypothetical protein STEHIDRAFT_139656 [Stereum hirsutum FP-91666 SS1]	No differential expression	Not secreted	NA	NA	NA	NA
Lactarius akahatsu	Lacaka1|MSTRG.10756	5438	281	MSVLGRKRAKAEQSAENIPEVPLAGPSNSAGHGQTDDHTFADRPPSEVVPSRPPTTSSTTAAPRQPSRDRVVGDEIFTDQDFDFFDNPSNLHRNGSASSSQTVENQHPFTFAFPGVARSPVTLTPAPTGPLADPPSTLPVPSSLPYPERPHSPSPAPAPYRPVARPPPSESYRPFGFPPDGRNPLGSPALHESAIDPATFLHTPPRQSPDIPSPGLDPIDGRQRASSIGLGMTSVPPRVEDTPAAPVRRRCMAPSWKATRDLVTLALRVRYQLLDQREVLI	XP_009541227.1	3.6e-12	hypothetical protein HETIRDRAFT_456947 [Heterobasidion irregulare TC 32-1]	No differential expression	Not secreted	NA	NA	NA	NA
Lactarius akahatsu	Lacaka1|MSTRG.2977	7314	281	MQGNHTFLGTQSSTSFVDTQKPFQVTYGKGAVAGNIIKENIAIAGLKLTAHTFGVALQETDDFTASQFDGLMGLAKSTLSEQKALTPVEALAKAGSIKDAIVSYKISRLADQKNDGTITFGGLDPSKFDQTTLVALPNVNTQGFWEAAMDAVTVDGKDLGLKGRTAVLDTGTTLIIAPPADAQAIHKAIPGSKSNGNGFVIPCTTNASIALSFGGKSFAIDPRDITFAPVDPNDPTGDCSSGIVPGQFGGPQQLLVGDVFLKNAYFSTNVGKDTIQLAKLT	XP_009545148.1	3.1e-112	aspartic peptidase [Heterobasidion irregulare TC 32-1]	No differential expression	Not secreted	NA	A01A	PF00026.24	Asp
Lactarius akahatsu	Lacaka1|MSTRG.7257	8762	281	MSHRKRKHRQRSDTHNSQYDQSEGPSLARPDPALFIVAHEADIIRGPQAARTADSLEVFTNVDGNGGSRIGEGLLKWEGNVRGEHGDMWVDRYVRLSYLLNEYPAPVPRVIYYRPTRMHIWLAYPRSPCCVLNHCDSKFAVTIHVVVQLLWYFSSASLWPLTRAPRAHAKNAPYRYDARLLLDALPTVTVSAVPPHAPPDSPGGGWSDLPSDSEDTFFLTPDETADLHRTKRMRHLDALRTARMRALSPAPRLDDDDADPWGGSDEEVSPLAPIRERSSIN	XP_007868391.1	9.2e-24	hypothetical protein GLOTRDRAFT_140022 [Gloeophyllum trabeum ATCC 11539]	No differential expression	Not secreted	NA	NA	NA	NA
Lactarius akahatsu	Lacaka1|MSTRG.8989	1103	281	KTASDCGHLDAVQFLIDSGADLDSCDNNGWAPFHSAANNGHLDVVKLLLRRGADVNIRNNHGKTPLDLASNKKKFDIVNFLSGCARDVVSLDGMADPTPSLPKPPSTGLNDVQPLRIEAKFSDDDKNPLCTASESGQLDIMQSLLDCGSDVNERNIARKTPLSVASRHGKLEAATLLIGHGADINARDRDGWTPLHSASRYRHLDVARLLLDHGADANAKKRDQGTALHLAAYSGHLEIAMLLLERGANVNVQDGDGRTPIQTAIAFGHLAIAELLSGQGA	NA	NA	NA	No differential expression	Not secreted	NA	NA	PF12796.8,PF13637.7,PF13857.7,PF00023.31,PF13606.7	Ank_2,Ank_4,Ank_5,Ank,Ank_3
Lactarius akahatsu	Lacaka1|MSTRG.2637	6378	282	MSSREQPSRLNFTNTRGRGGPLRPDYGNRFYLFGSRGRGGGSAARPAHNVPSGPDLKEGLDTTTIIQTIPAPAHPTAPEYFPIDNVKYVASYNWTGAEKPTIVVPGAVHSLHPYFFSCPLSIILGSPAIWTGRAVPFALQPDEGYVYFDRKNAQLSQYPMLPLFAAADAMHDQEAAPPVDWPAVDFVTDHSDLRKLLRWLNPSPGREVQDFRIDVQLVGTKTLVLRRWESPARWVHTTRSYGHAFAIAMTRAAPDCPSSRHHRAVSYVRRRLISFPQRCWGH	XP_007867107.1	4e-35	hypothetical protein GLOTRDRAFT_77669 [Gloeophyllum trabeum ATCC 11539]	No differential expression	Not secreted	NA	NA	NA	NA
Lactarius akahatsu	Lacaka1|MSTRG.8125	1896	282	SASDGFPSGTISIASTPTGSSNTGDLEEEGVAKSTSQCPHPGVAFATGIHFGGAGESESCKHATTINVLADNVFIQIFDFCRIDHDPDAGYPPCLVWDWHGLVHVCQRWRQIVFASPRQLDLQIYCKYGTPVKESLGCWPALPIAIDYYTSYDDDGSEISAPTDEHCDSAIATLEHPDRVCSIRMSVANCLFEDMAKVLQRPFPVLTSLTLQSKLMDIPSLSDSFLGGYAPRLQKFTLAGIPFPTFPTFLRSARDIVKLRLIAIPYTGDGDNGRWFGWVDQT	NA	NA	NA	No differential expression	Not secreted	NA	NA	NA	NA
Lactarius akahatsu	Lacaka1|MSTRG.11623	1930	284	MIESTFSEADGGGRITLPFQTIPNPNGNIPVPSHLTVNTIHLEAGQGGAPWTGYYVVYRGTKYAVCMYQGVWFEIRFDDKKNIWYAFCVARAAFNLLHEPSERMNIDELKAQTQTQKIPASNAPIPITTGFATAPQATAPRDLPANSGTSKQPEGSIPGLGADFGKGSKSTSKGKGKGDDDKKDTTAGPPGDGGDDPDADIDAEEDRRFRAILKSVKGDRLEGALPDAFRGDRSRTKKFLLAFNRYCFMNSEVGMIKDPMRKTILFLSLCKDSRSMGRPSLGSA	NA	NA	NA	No differential expression	Not secreted	NA	NA	NA	NA
Lactarius akahatsu	Lacaka1|MSTRG.4747	855	284	FALGIPNLVSSDGSDTDEGEGKYDSDEDDCSDYSEAKPINFTDIAARPSSVRTDAPPKKLLEPQTFLLRPGLKRVSCKPLQKAIVEDDFEAFVHTLDLYEFAGVAIWPDSGAYDFAVALDRIEMLDELIRRSGVGIPIPSDAAKVSGAASKKVPEERVYLGLKVGGKRRADIAKHGQTQRKTPTYNYDLLRSAIRSGATKVIDYLAGPRPIAAFTHYAKTHDDDTAQYLKGIDNLGAVLPDLLGWKHDELNESPLLCAVIDNRIDVLKQLFALKPNLMEEALHL	XP_009544330.1	4.4e-42	hypothetical protein HETIRDRAFT_458314 [Heterobasidion irregulare TC 32-1]	No differential expression	Not secreted	NA	NA	NA	NA
Lactarius akahatsu	Lacaka1|MSTRG.5279	6805	284	PCLACHRLRPPVSPASAPLPRRAPWKRLLGCRAAIEGDHFARKVQSSRYAHPLHMHAHCRLTSSCRSLGGFSILLANMDRAPADEIFAIHATIRSHELEIESLDTVIQSILRRVQQLRAQRARHADAIAKFRGSISMALRAPDDVLLFIFEHCAADGWANAPLVVSHVCRKWRRASYFPRVWSYIYLSSDSLNVISKTPFMAFPGSSCTIACRSRTSGFSTLMCSTPLNLILDHASQWRSPDFEHKVCPTGQRDLVTMPSPYPSSTHPRHYKLLHRRCDGTGRR	PIL23563.1	4.6e-23	hypothetical protein GSI_14876 [Ganoderma sinense ZZ0214-1]	No differential expression	Not secreted	NA	NA	NA	NA
Lactarius akahatsu	Lacaka1|MSTRG.5461	10460	284	MIESTFSEADGGGRITLPFQTIPNPNGNIPVPSHLTVNTIHLEAGQGGAPWTGYYVVYRGTKYAVCMYQGVWFEIRFDDKKNIWYAFCVARAAFNLLHEPSERMNIDELKAQTQTQKIPASNAPIPITTGFATAPQATAPRDLPANSGTSKQPEGSIPGLGADFGKGSKSTSKGKGKGDDDKKDTTAGPPGDGGDDPDADIDAEEDRRFRAILKSVKGDRLEGALPDAFRGDRSRTKKFLLAFNRYCFMNSEVGMIKDPMRKTILFLSLCKDSRSMGRPSLGSA	NA	NA	NA	No differential expression	Not secreted	NA	NA	NA	NA
Lactarius akahatsu	Lacaka1|MSTRG.6934	3050	284	MTTKAGDDASEGETDEYLHRRAILEPAILNVVNALGGYEGGVYRLGDEAYGCLKDLKRFWRKDDADDARTVARILWGARVLPNDLVPILLETAGKGHVEDKRALACADLVAAMTWPIDIAEELKELDELRDDQDPAAGAEYTELRQSHLHYKAALLKPGVLRALLALAVPCLARASSTSGGSGVRESRAAARDAQVVSVVLHVVRNLAFIADAPANVHLSADQAELASLQSRLVRALSEAHFLELLLAAAAGAQGDAMFNASNTLVLEIFYLLFRGIRPSSLVS	XP_007303382.1	1.1e-93	timeless-domain-containing protein [Stereum hirsutum FP-91666 SS1]	No differential expression	Not secreted	NA	NA	PF04821.15	TIMELESS
Lactarius akahatsu	Lacaka1|MSTRG.10042	5546	285	MVHVVLVDPVPEARATAAKTLGTLVERLGEVNFPDLVPSLIRTLKTDTSGVDRQGAAQGLSEVLSSLGMERLEGLLPDIISNAQSPRSTIREGFMSLLVFLPATFGTRFQPHLPKIIVPILKGLSDTEDYVREAAMRAGRMVITNYSSKAIDLLLPELERGMFDPAWRIRVRELVSLHSHFSHFISNRLSPLSENSFSRFLASQASRKWTTMLRVPRWLSRSPPGRPSQRSLALIVGIVYYRPFISLDRTLYILSGSLRFRFGKCWYITRQRRVRNSFWLAPYVS	XP_007310181.1	4.4e-82	ARM repeat-containing protein [Stereum hirsutum FP-91666 SS1]	No differential expression	Not secreted	NA	NA	PF02985.23,PF13513.7,PF13646.7	HEAT,HEAT_EZ,HEAT_2
Lactarius akahatsu	Lacaka1|MSTRG.6670	6812	285	ALKADDIVALKTKVGFNPDAAFQIPDEVYAAWSVIGKRGAALEEQWRSLLSSYAKSYPNEHAELTRRISGKLPAGWEKSLPVYKSSDPAQASRKLSEIALTALTPALPDLLGGSADLTGSNLTKVKGSTDFQPPSTGLGSYKGTYIRYGVREHGMGAIANGLAAYGGIIPFIGTFLNFVSYAAGAVRLSALSRHQVIWVGAYISLCITMISANNNISALSHSRLHRSWRGRPYPPARRNGSPLPRDAQCRILASCGWQRDLRRLPRRDPVDRDPIDPFTFPTEPA	KDQ59477.1	1.7e-86	hypothetical protein JAAARDRAFT_622289 [Jaapia argillacea MUCL 33604]	No differential expression	Not secreted	NA	NA	PF02779.25,PF00456.22	Transket_pyr,Transketolase_N
Lactarius akahatsu	Lacaka1|MSTRG.8236	1675	285	MDADVVLWDSHPLRLGSTPVAVWIDGIVQPLGEEIGVLVGKGKEAPEWREPPNVPDWKRERQEALRWDGLPPLTVDQISEAVAFTNVSTVLVRGAEGIEHLFRPSAHDHARGVVIVHAGKIICAGVDNTCNSLVPNGARLIDLEGGSIAPAFISFGSNLGLQEIAFEPSTGDGVLFDAFEKDVPRVLRDPGGIVQAADGLEFQTRNALCGPFIFSQVVVFPNAILSEQHCLPRWRNCCHLTSQCNFHPTFVCRAFYDIPHRGATCPCRRRGHSTHLSATLRHSTP	KIM83388.1	6e-55	hypothetical protein PILCRDRAFT_69640 [Piloderma croceum F 1598]	No differential expression	Not secreted	NA	NA	NA	NA
Lactarius akahatsu	Lacaka1|MSTRG.8110	5649	286	MHSKPLTMSHPPIASCTWDVPCELYVYAQIRSAHAYLFYRWGTIYDSSDDLNRETLLDFAVMKLLHGPYNRPDSLSSVVPMSTDQQCAVLSQRLALDIDSSAYITSDSTRNYVTADKAQLQIANYVRVRIGTPENFVSVRGVAASEPILSEAASCIMRGNYNFNLPDALLDVLDSYAISHGDRGELLVAAFFTRARDLYVRRVPPEKLFPEVLTRICPIFSVKDLLSQLFQESHFTMMLDSLPSIRRADFSSQKFGDVFGRTKMHFNHMIKPLEQEVLTRVHVYLR	PBK86936.1	5.9e-26	hypothetical protein ARMGADRAFT_1066289 [Armillaria gallica]	No differential expression	Not secreted	NA	NA	NA	NA
Lactarius akahatsu	Lacaka1|MSTRG.8492	7749	286	NSAELHAQSSPNTDYISPITLGYVDTAHFRSNGQSQLPPDMHLPPHHMSAAHDARSAPANLVFNTTPPIPLPSPGELDLDLSPLSPWMDAYKPDSSQQRRSKRTASPHEEEQAKLARQRPSPSPRVHPAPNSTKRVSRGTKSASSTPLIRSTRGGVRKNGSSGEAPGDTPSPVDLSMPPPVAPASQSEPGSSPPLTNMVVASTSPTSATGRGHNITPVTPASIMNLGGLGINSGLAPPTNAAAKGKSAGRGKDTATSTPSTKKGNGLSLSLKPILPGKSSAFSHVR	KZV76496.1	3.8e-41	hypothetical protein PENSPDRAFT_598435 [Peniophora sp. CONT]	No differential expression	Not secreted	NA	NA	NA	NA
Lactarius akahatsu	Lacaka1|MSTRG.8991	4162	287	MWKQYMRTPLSGQPLAHEHHPGGSPKRERGLSRVASLPSVKTPSATTAGRGDPMRGLNGNQQLQPQHQVVGPGSHHVQQYGAHAAYTRGHNHTDDLRSYEQAVLARRAPLTLHLAPRRRGNTTSTGPHPTDASSAPVSAVLPPAIEKGSSASPVGSGSGSGSDRSASGFTDDRGSTSASPAPGLGGSLAVEDPTRPTFKRLPSQTLGPEYAKRMATASMLSGARDEFGVGFSTLGEPDLPLLQRRGLASHGPNHAQGHGHGHGLVTAERARRMSFPSGRTGIVGLQE	OBZ72722.1	3.5e-18	hypothetical protein A0H81_07355 [Grifola frondosa]	No differential expression	Not secreted	NA	NA	NA	NA
Lactarius akahatsu	Lacaka1|MSTRG.6648	6947	288	MAPLKKPLFAPPPPPTLHHFFTKADPSINRGASSSFKAQKRVKVGLSSSRIKQKTTCTSAEIIVLDSEDDAPVMRTKRKAKDPAESSSDVEVVEIDAQQARTSSSRKKEKTAHGAGFGGSGIECLFTLPQDESLHFVEFGRPRLLVPTEDTRHSTEGKQPLATGSGFPQDESSVPTSAPLLAADLGVSARSAIVASDSNSHISATTPSSCLDNLIKIEDEWSTGDDELVRPNPGEFDDVLELTDDDEVEHVLKVEGESLSASGDNTLEQCPFCGRSLTSLAPLVSSLL	NA	NA	NA	No differential expression	Not secreted	NA	NA	NA	NA
Lactarius akahatsu	Lacaka1|MSTRG.10041	2702	289	MSRTTSSPNMSSTSQSTSTHRSGFGLGGESPTVVERKVKALLNELTTERFDTISDEIVAWANKSEKEKDGRTLIQVIKLVFEKATDEEIFSEIYARLCRKMMEQISPKVQDDGIKNSEGKPFAGGNLFRKYLLNRCQEEFERGWVAAAHVQDIKKVSEKTKGGEGSELYSDEYSAAAKARRRGLGLVRFIGELFKFQMLTERIMHECIKKLLGNVENPEEEEIESLCKLLTTVGSLLDTPKARAHLDVYFSRMRGLMENENVNARMVSVLQVCVPFPCAANIHWLIRLS	KZV69987.1	9.6e-101	hypothetical protein PENSPDRAFT_685877 [Peniophora sp. CONT]	No differential expression	Not secreted	NA	NA	PF02854.20	MIF4G
Lactarius akahatsu	Lacaka1|MSTRG.10780	4222	289	MVQIKDTGRPVRSGISLPHTRLSMRITPGNAWAAAGMLRVLGTLKSSSFSRNFEGQIKDLGNWVAEIHSAMYPNLVRLLHVDASRLLMPRRVHASPQQANGLFKNYADGNSTDNFDDASSSALLAATVFRLALLTGNKKFVREAERTRAALFATNGTSAAAIGVPVVTSSTPQPSSTTPSSTASAPGSAATAASNAFADTPHFTVDGWLAPVVDPINYAIEGAQSPEGQAFTLMLESAWRDWSAAGSPGANVAPPSARVGLSTVLLGAVGLVVACTAMMMDSRAVLFSI	XP_009551195.1	1.7e-44	hypothetical protein HETIRDRAFT_65769 [Heterobasidion irregulare TC 32-1]	No differential expression	Not secreted	NA	NA	NA	NA
Lactarius akahatsu	Lacaka1|MSTRG.5989	2451	289	FRWVFCQLEALRHCFPPNLRQFLNELPETLDETYERILRGINKAQKDNARRLLQCLAVAVRPLRVEELAELLAFDFQASSSEGIPKLKDDWRWDDQEEAVLSTCSSLIAVVSAGDSRVVQFSHFSVKEYLTAARLAQSQGDVSRFHIDLDGAHTILAQACLGTLLRLDEHTDAKGFPLVEYAAEHWVDHARSEEVSSRIRDGIDDLFNTYKPHFAAWLRAHDIDEHWDSFSNRPRQGVGSPLYYAAFCGLYDQAERLIVEHPEQVNAGGGRIRAPLPAALHKGHFGVAN	OCH87556.1	1.6e-68	hypothetical protein OBBRIDRAFT_735932, partial [Obba rivulosa]	No differential expression	Not secreted	NA	NA	NA	NA
Lactarius akahatsu	Lacaka1|MSTRG.6606	2840	289	MVILLADDENSDESGSGGPKKRGKPSTTRDLEGAESTKRTRRSPATRTRQNNNKSKAARRGAEMLVSTTAQGLYHRSLPGLSVPQGSMGALLQEPPSWIEEREQVEPWHDSGSSVPFRGVEDAEDGEVLRKIPTNLTERERLMLQTTQADEERGAVRYIMCRVCSNRCFRKWATFQRHCKSCEKHPSKLKFCPKCGDYFGRQDSGDRHKGKKRQEACLSTSQDEAREKEQKATRILEAFEARLQHCLRSGEDPGPRFSEVMSRKLTNTSKKVSKAETSLEGESWATRLC	NA	NA	NA	No differential expression	Not secreted	NA	NA	NA	NA
Lactarius akahatsu	Lacaka1|MSTRG.7030	10384	289	MMHIAPHVASTAPILSRPWSDCTTPAQDISAAEQASLNHLTVPELSPSDPNSNASSPASSEPVTPVDPPSLAAPPDPLVDGKHQPAPRPYRPIAKAASRGTVWRARQVLFSLGKRKRQPSEDAGISADVGVQVLDSDDDGEEALDSPAETPPATSQVRYPLPITANGYARDVTSQSLFNLPNVSIDGTPPTQARPRVCVPVDSEVSFSLTPAPYGPTHLSSHARRSPGAARTTRSPRRPLPRPSERAPHANRRRVHHGRRLRSPPWRASCSSCHGALPSARQSCCTPAR	NA	NA	NA	No differential expression	Not secreted	NA	NA	NA	NA
Lactarius akahatsu	Lacaka1|MSTRG.11273	872	290	LLQHLHSSTNLVDLQLYDVFDSWQLPPEALTDALSGMTQLQSLSLHFLPTTRPPFLRPQFLVGRTILPFLTRLNFRGISEYLERLVVRIDAPRLRDIELTFLNNNLVTFLRLQEFIDRIEMHKSHRQAHILSSGRVISISLIQPGVAACLKLQFFCEPLDRQLLFMILVCDHLSASLFNVEDLRISTMQSIVWGDNAYSEWQGLLNLFTGVQWFHVAGNLSTDIVRPLQLLDSGNTVMPSLDTLYVAQPGPRHAPLREAVVASMVSRRLSDRPIEVEYERLCHINELRGT	NA	NA	NA	No differential expression	Not secreted	NA	NA	NA	NA
Lactarius akahatsu	Lacaka1|MSTRG.8319	5900	290	MKFTREDFFQSTLQQIYPEVRKEVETKAAILREKLTQEREDAIRNNNVIDLYLAAMKPKTKGKGKAKSVTTNQQLSLATPKAGAKRSAEGLIRTSSVAASDHVTVIGDDTDTGMILEDAPTVLPSPVLGETPTERIEAVVAAMGEQLGGDPFLAFGHAAAMLDPFLQRESSICDDAQAVAEAPTPDRPMMVTQLQINPAVAATRGVSTSVHGPGNAMEDDPSPPPAPVREATPDDDPLAAFKAVNRWETSASQPSSACHSNKQSRVPTTMIVVVAVACSVHPGAPAASRR	NA	NA	NA	No differential expression	Not secreted	NA	NA	NA	NA
Lactarius akahatsu	Lacaka1|MSTRG.5499	1473	291	MTSSSSTFSIYPPSGYISPREMVACLAGLPSLQNFIIGFRSATPHPDRIHSPPITRTVLPVLSSFELQGAKEYVEDLVSRIDAPQLDRLYIHYLHYFVTQVTQLSKFIDCSVGPELTLFKHAQLGLISEHATLTIYRSAKHSSLDHRYSAMTGISHPEIRWRVFSMAYMIRYFSTILSNVVHLDLEAQLEEPHPEGRDAVGWLCFLQRFPTVKVLRVSHEIARHVALALEDITVETVAESLPSLVSIDLEGQPASSIEKFVAVRRLYGHPVTFIETKMEFDERLGSYYVDE	NA	NA	NA	No differential expression	Not secreted	NA	NA	NA	NA
Lactarius akahatsu	Lacaka1|MSTRG.6055	15154	291	MDQHQHRSRSSSRSELAHPPASISVAGPHKAHASKLSYTLRAPPSPSASAYPSSRSSHRHSLPPPAHTSTPHCNEANTPPHYITPPSPSPRRLSYLLPSPLITPSPVLPTLATMSPQVLVPPPIPQTPSLHDQLRSSSRSERLLRETLRRDRAASLSPRTRVPRPESRSGRVASTSSEMFHCACTDSDEEGDEHHDNSLHVSLLFVNPPPHPPSFQRSSKSSVDVRTMSRRPEPHLKEKQPIPSVIHINSSQRRSAPQAQPESFMYGAAMTQVLDRRPDRDPAWSSPEVSI	NA	NA	NA	No differential expression	Not secreted	NA	NA	NA	NA
Lactarius akahatsu	Lacaka1|MSTRG.6931	7864	291	MTNIITTIMVEVLTIFGIATKELRRGSASGFPVVCLSILIEARVEKFLKKLAGRADLEDAIRKLDRLTQEEARMALAEVLKITHIVRDDVKVVDGKVEGIDDKVDDLGGKVSDVGNKVDDIGDKVADVGDKLDDVGDKVDDVEGKVEDIGDRVQSVDEKVQVIIDGARHISSQSLIPSNIFTFRRQGSKINYPTDGKQLRRTQVFVIYRHPCSLLALKPTDSESLSKTPTRVAVSRGSIDKSQHRTKGSTQGNGLVVLPRQYLLRMEVHWLSLVDPRKACVSVTILRVRAF	NA	NA	NA	No differential expression	Not secreted	NA	NA	PF06009.13,PF05531.13	Laminin_II,NPV_P10
Lactarius akahatsu	Lacaka1|MSTRG.1388	5941	292	MRPKEILGMVEEAAGTRMFEERKDKAKKTMGKKEKRVDEITALLAEEITPKLDTLRAERRAYVQYQKAGAELERLARVLRAYEWNDHRTKASRKDAQITEREREVAQARRNKERATGEAGVAEANRVDVQTQRDRELKKGGKITRMEEEAKELEKVVVKLRTQAEIKEGTIKDEEAACDASARELSDVRSSLCFTYLLVAEVRTSSKLHWRQKRRRWTPSPPTTTPSRKNIPRRRRRLPRPKISCRRSSPALLATLRSHPAAVGVTWARLPTHARGWHRRPQRRSSSACDTA	OBZ73328.1	1.6e-50	Structural maintenance of chromosomes protein 2 [Grifola frondosa]	No differential expression	Not secreted	NA	NA	NA	NA
Lactarius akahatsu	Lacaka1|MSTRG.10641	9354	293	MSSPSNPFENASVPTTQTRSESRNGRSNYLPSRLPFHPVSTLQPPQTAANLIGRIPDSEPTGQESRRQFFPDHLESTTVPRNLFSPDDDVDMRRASDLSDRTLYDRTEEEMQQSLNRVSLSSYQHPNDIPPPRSLYFSAPPRSGARRRYSHKSSSEGRYGVRGEDGKSPNDFRVEPPRHRGVVSNLLELSHVSDSTLPWDDGRRLATSRTGSLGEQFAEGDRRPRLSRLYSLGGYDADDPKITGATRELLDDPADLERNVKEQMDLRSMSYKQRRKEAQKIKIRFFVTCKSEL	PSS34048.1	1.8e-14	hypothetical protein PHLCEN_2v1952 [Phlebia centrifuga]	No differential expression	Not secreted	NA	NA	NA	NA
Lactarius akahatsu	Lacaka1|MSTRG.3011	3927	294	MYAMRFLPCINVLIPFLVCSTVCANYATMVNKGDAIGSDEWREMPIEKQMGFRIPISVIVNITHLRSRQPVITASEYLRLHGQDPESESSSGVWPRQSYHTHPNVFETNKTKTPSLFVIENHWYAPTGIVRVDYIPEEMKKRGGLERHHGPDKYDGSAEHWPPLEPTELSTYLTETANGIGFPLDWYTAKYVLKNSHLIGDVNLDYDDVVDKVLNAHGWEVLYTFPAVSVPLFHFVVMTLIPPQVLKWTLLRSLLVISDKSLHARQSEASKMTIMMWMLTLSCLLERLISIPSP	XP_009541123.1	2.3e-49	hypothetical protein HETIRDRAFT_145358, partial [Heterobasidion irregulare TC 32-1]	No differential expression	Not secreted	NA	NA	NA	NA
Lactarius akahatsu	Lacaka1|MSTRG.6897	8312	294	MYAMRFLPCINVLIPFLVCSTVCANYATMVNKGDAIGSDEWREMPIEKQMGFRIPISVIVNITHLRSRQPVITASEYLRLHGQDPESESSSGVWPRQSYHTHPNVFETNKTKTPSLFVIENHWYAPTGIVRVDYIPEEMKKRGGLERHHGPDKYDGSAEHWPPLEPTELSTYLTETANGIGFPLDWYTAKYVLKNSHLIGDVNLDYDDVVDKVLNAHGWEVLYTFPAVSVPLFHFVVMTLIPPQVLKWTLLRSLLVISDKSLHARQSEASKMTIMMWMLTLSCLLERLISIPSP	XP_009541123.1	2.3e-49	hypothetical protein HETIRDRAFT_145358, partial [Heterobasidion irregulare TC 32-1]	No differential expression	Not secreted	NA	NA	NA	NA
Lactarius akahatsu	Lacaka1|MSTRG.5173	3773	295	MRRGGATTEQTQGTVLGGDPGTVLSSRDQGVTPSSLRSFYKTSSYVPLAAGWNMLGAAGYLGDYPSPEDLRQFMNRYRVDATSETYRVVQIQGGGYDPSSPTIEANLNMQYTSAIAYPTTHIFYSTGGSDTLGDPFINWLDYVLGLWSVPQTVSTPYSLPEYRIPLDYATHVCNLFAQLGARGVSVLFSSGNDGIGHGDCLVQDSSGKSQVQFLPTFPSTCAYGILTLPLSALRDHSLHRPRSRRSLGHQCWRNDGLQPRDCGESLRWRLLGVFSAAVIPGRCRAHLPLEPRRPV	XP_007864796.1	1.2e-53	subtilisin-like protein [Gloeophyllum trabeum ATCC 11539]	No differential expression	Not secreted	NA	NA	NA	NA
Lactarius akahatsu	Lacaka1|MSTRG.8438	890	296	KVQGLDASALLRNYEKWGPSARTCVRLVRDPVGEFYHAFLVNNAASAFVECPPPRTTFDAIEVFHVLFSVRPEAEEDRGGRTVPVAEIATEHIKRIISCAAAGAVARKRIEFYRTLSTQPAFKGFAGDMFEGFVLSWLYADSNVEPLRCFATGQPDLEIPACGKEKSTFCGSKNDLEKVKWDKLPLCLLPTAKIFPTADAIVVTDEFIITIQVTVPYEHKAKTVGFKNIKDLISSYVERDKWRHVFVTDGDDAAASLLNQDLPEIPEHTVVHSAVFDIGRSAVTRENMKAFNEKKL	KIM76964.1	2.8e-31	hypothetical protein PILCRDRAFT_629240 [Piloderma croceum F 1598]	No differential expression	Not secreted	NA	NA	NA	NA
Lactarius akahatsu	Lacaka1|MSTRG.9855	5291	296	MDYRPRLHLPGTVPISSPTLPVSADRHTYPTGNRVGSSSSSYAPSPNPRKRAKMDDRSSSAPSPISGAFPTHLHQHPAPPPLPPPPQQQHQQHAHAYQSGFFPGFSHDVSPTLPHGSALHTPASFPSPTGGGVSSGGPGGGGSGGPPLHLLQTAAAAASVYVSSPRHHPPRITQPHFGPSTEDLFASVFGPAGASGVGLDPEFDFLAPPLTFDWPQFAPPTTHAGGTSGNQHHQQTTTGGGGSGGGDSSSSSSWLDFLSGAADAPRSPRMAKRSRGDGLGGGGGSEEGAHGPSRSG	NA	NA	NA	No differential expression	Not secreted	NA	NA	NA	NA
Lactarius akahatsu	Lacaka1|MSTRG.11766	2821	297	MSMISVVPPPPTTNKLDSVQRTRVMRSSRKLGAVLGATPFLIESNGCSITATLHTASSQHENDHVRASSPMQIKRHRRQCSIVEEPPIHSELSPFSMLSLDLGSSKESLLTMVESSIEDVPVLLAKSQRSADAPRPLLLYLNSAPLSPPDSDVPLEPIPLTPLSAKTEVPQTPTTPIEPSHTEARRRKMARVVRKLGENVPAELVFQSSDVGWTETTHVQTAKLVGSRSISHSRSTKSHRRRSSSLGSNSQWQRLLELPAPVFSSGARAPEDQRWVGTWNRRNIAQVQRELRALRRR	KIJ58925.1	3.8e-28	hypothetical protein HYDPIDRAFT_118984 [Hydnomerulius pinastri MD-312]	No differential expression	Not secreted	NA	NA	NA	NA
Lactarius akahatsu	Lacaka1|MSTRG.8117	13290	297	MADATKEFMELEKLGQDMQMRRRQIQSPGFAALPSDVKATFQTGLTSAESAYQKKKDSFNSVVNKLSETDFWPPVPSQRAGELEAKLKEAKTMLGGLADGVSQLYKRIESLYEQRSGGPSAKRSGPDEDVEMADGAIRTKKRRRLSINGSDDATPSDIREDVESIKNTIREIDDHLHEVENDISQHSCHVMELLEVKIEEKIEEIARNADVSSLVEVRLGPQTTKTFQAFSESFAQADREIGELAQEVSELIPKLDSLKRENDLFKQEEAASKDLLAEVRDPHLRCSHPLTDEDVYS	KDQ60812.1	1.3e-07	hypothetical protein JAAARDRAFT_190954 [Jaapia argillacea MUCL 33604]	No differential expression	Not secreted	NA	NA	NA	NA
Lactarius akahatsu	Lacaka1|MSTRG.9557	4920	297	AALCLHRNLWGKDLKGLLKSLPLGDKGKLEYLPVAEVNRLGLRSLDYQEDVLLFRQEYTIAFESLHLGSPMSRSGKRGVVVVGQPGSGVYYLPIMVTFTHLSDTNPGKSSFIYYLLLRQLSDKKSTAFQVSSDHFVLFRDRVRVYSGRDKGVVPEGTLALTGAHGESTPCDAFLDAPRVRDAWIILAASWNWEVCFYRWADANVFVMDHFSYDEIKALGFVRLDLCTHLFLPEQPFPTEISLVSMSASSSAFTTSGVLLRATVCSSHGGTFLNALTSHMFTPLRVILSRTSVALEDD	NA	NA	NA	No differential expression	Not secreted	NA	NA	NA	NA
Lactarius akahatsu	Lacaka1|MSTRG.2727	4365	299	MWSSRVLTSCGSRSDHILPHWFSLRLPITGSQHIATLLSTGLSLLLYVGSGMSLLTVSYVFSVAFLFQLFLVSRIDCRRIMSDHVAVRGFLLSSQAEPSRLVPPTALGSVHTPNGFRGSHCNMCRQHRARVRGYPLLASPLAHPLCVRSPISLGVFAASFAVIFIALFATSAQPTILRLALQFYSTSSLLRWRLTRGWQRRLVSWYKARRAARVCVWIKNDDVCLYFERRTCSAICYSTLVQIHVMLRALLSVQKNVPDARTVLFVYAYRTIDAIPSELHPNARLLDEAFPTITVEFVS	KZV64688.1	2e-45	hypothetical protein PENSPDRAFT_656347 [Peniophora sp. CONT]	No differential expression	Not secreted	NA	NA	NA	NA
Lactarius akahatsu	Lacaka1|MSTRG.9573	2903	299	MHDELLSLFDGLGDATGPQPSCGQPRDFGAPFDRRDSDVTIRSCDRVDFQVHKAVLGIASAAFQDMFTAPEPSPYGQGQVKQVIDLTEDSKTLHRLLSMIYPMNPIVPDTLEDALSLLSACQKYQMDSTATRVRALICARTPPLFTSENCFRAYGIASRCHLEEEALLSARLTLECPLTFEACGEDLRFISGADLFQLFGYRNECIKVAEDCIEKTNHWLSPVLSTGSTGLGYIVDRATEERLPVSKWWRRHFLRRIALRPSPKTITDRLASKNALSWHRYKSACTSCRRPDETGIGDT	KZV63628.1	5.4e-22	hypothetical protein PENSPDRAFT_757811 [Peniophora sp. CONT]	No differential expression	Not secreted	NA	NA	PF00651.32	BTB
Lactarius akahatsu	Lacaka1|MSTRG.9824	9456	299	MRICEPEFTLENVWHVLDVLEGSPAESAGLVPYGDWIIGWSGGVLGAEGDFYDVVEAVRPRSRCHRFIQLINSLESISTSRFGFMFIRTILSESSTLNSFSPPHGSPAPSGKSSWSQTGSGAVRACLVVCSGRFRVRTKFHHRSHLLHSFGLLHRIPPIPDDRQPGTLPSELQDSTGFEEQTLYVPADATEDPLDLEFNTDAHDQQHQPVFSPPHPHDYSHSYSNRSATLDRQLPSSTIPEEYEETESYLHSSRLSQDSDHNRHYHDHSHHNRHIRAAPASTPSSSLAPDANSNGDSRS	KZV61511.1	2.2e-39	hypothetical protein PENSPDRAFT_293596 [Peniophora sp. CONT]	No differential expression	Not secreted	NA	NA	PF04495.15	GRASP55_65
Lactarius akahatsu	Lacaka1|MSTRG.3722	7963	300	MVLGFFVFEEDEPSTEEDTRVDWIGAALITAGLVLIVFVLSDSPTARKGWRNPRELSSKSVYAFSYSPRLNGVRRYHRLIRRWRPARLSLRRLAVLLGAKTREPGSSAYTLDGTAAHEAIDVDACARSLRGHADDRLRQLGSIHDLDSVGRAVLPDIPEPEPDPHDAASAADVRFGNRREHPDRAHDRALRRHVHRRRGHALDRVCGRPVRRDRPERTVLGVWLSRGVSYRARRGLHVRVWHAVHRPGVSAARAERRGGAVPSDDADRVGDRGQRVDDRVQQCAEDAVEAAWCRGGRAGR	XP_007310570.1	9.5e-11	MFS general substrate transporter [Stereum hirsutum FP-91666 SS1]	No differential expression	Not secreted	NA	NA	NA	NA
Lactarius akahatsu	Lacaka1|MSTRG.5849	3772	300	MGKSRLLDELSKDLFVIPINFRPSSGRSLSCHIYLRGSLNLSYRFLPPDGNVRFFLTSENRPRATHQMAVSLVRHFLLALFKNTASILAEESMGGTKADRISNFRVFMSRDQSMHSPGQERKQSYETVVDHAKAAGVKVDLPSDNDLTTALNALETALNRNSAPDGHSTKADHERRVDIFLAFDEAHTLTDCYNDQEESRFVVLRGALSSILGHGPLFSFFLSTSSKITQFGQSRGHDNSDRINSGYMTIPRRYIYVGFDQLVQNRKVRRGSTLEDVTSLDFIAHLHQEKPPALARGKTV	KDQ51683.1	1.9e-22	hypothetical protein JAAARDRAFT_210966 [Jaapia argillacea MUCL 33604]	No differential expression	Not secreted	NA	NA	NA	NA
Lactarius akahatsu	Lacaka1|MSTRG.11666	1754	301	RIWNQTYHNTVTQWGFERLTCEWCVYRRQTSSGVIIFAVHVDDIVSVASSPDDNSWFRDKLKAQWDISDLGPAKYALGIAISRDRPNRLVSLSQTAKIDQLVEQYHQSNAHPTDTPMVVGLQLRRPDKKLPIPPEVSEWMERTPYRSLVGSLMYLAIATRPDIAYAVGRLSSFLDCHRPEHWTAAIRVLRYLKGTRSYALTLGERNTLNLYGYSDSDYANCVDTSRSLGGYCFMLGSGMVSWSSRKQATVADSSCYIALHEATHEAIFLRQLLSGLHLLPSSPTRLICDNDAATRLTEDHV	PPQ83529.1	4.2e-83	hypothetical protein CVT26_004120 [Gymnopilus dilepis]	No differential expression	Not secreted	NA	NA	PF07727.15	RVT_2
Lactarius akahatsu	Lacaka1|MSTRG.5457	8681	301	MDVQGPIHRRHWRGLSRPTRARNRRRVWSFISLDTETAPQGQEERKGAKCDVWFPLPSPATSTDTPLFYDDSAKSAEPPPPYPPPPPFVPLTAESVKNQIGLLRDFYERRLASTSASGVAPVVLQDDPPNPSQAKLGPLGQVMRPSSAAIAAAASGSKKKAKPKDSTATVATANAVPLARASGVTSADAGTVPPAGTPTVALGAAPGSMGIVQPATPVLSPQMTSAFAPVSASVALSAPAMTGMSPPTGATPVPEQQTPKKKGANGAANGGPGAGGAAGGGTGKKRGRPPEGLPPIVVASA	NA	NA	NA	No differential expression	Not secreted	NA	NA	NA	NA
Lactarius akahatsu	Lacaka1|MSTRG.10367	3718	302	MPSPPSPRIEIPDLRPADSTRPWSSFFPSAPVVVERPALDNLLLRSSTPDPDESVASPMSSPVRSIVSYAGSTSTFFFREPGPMCTFLSMVSADPSITSEPMTPLSHVSGKFNLSATHPNRLTTDLVVPPKAPSDETIPSTSVAPVDGTTTASTSNAPTLSRNPLAIQLVSFFFETVQRLFKVPGAVDLSYGGFEVAFSTDSIAWEGSALFEDAAEGDRRVFELMPAPANAALHRYIKDLARVRMDLAALQAGDGEGKEDPVVEQLVLRVKAEQETVQSWTRRVCSSAGALSIADPKFSPRK	NA	NA	NA	No differential expression	Not secreted	NA	NA	NA	NA
Lactarius akahatsu	Lacaka1|MSTRG.959	10890	302	MSTLASGREGEASGATGSTAPVQEAVRTPGDITRSLPTETPHMVGDFDDNANALWSLHVKEARSHDEARIQTLKDDMDGVLIFVCVYNSSFSIELMHSRQAGLFSAVLTSFVTDKIHDLQVNPAQQMVYYQQQNVALLAQISKQVSSIAPQVTIPSTSPPPYPNFNPSSSDVRVNAYWFMSLVFSISTALLATLVQQWVRDYMHVFQRYRNPLKSARLRQYLYEGAEGWYMPVVAESVPGLVHVSLFLFFLGLGDSLLAVHTTVAVTTIVPITNLEPRISVSKPILWPCLVSGAEDASAKLL	KZP12390.1	7.3e-35	hypothetical protein FIBSPDRAFT_158698, partial [Fibularhizoctonia sp. CBS 109695]	No differential expression	Not secreted	NA	NA	NA	NA
Lactarius akahatsu	Lacaka1|MSTRG.9712	9483	302	MARTLDEVDVLKVDGEKLEQYLSDEDGPPRHTSKPHEPREPIFKLAWSGYPNSYDPRGGETSLTILGGQFNHDPPGINVLWLPAFNPPAPPSPSNDQSLHLFFRDAMRESLTPLSAYFYPTPGLAQDFLLMPRDSPHFGGTWNPTAILMLFEGGEETRALEAQQFPPLEFLASAPAPSQDTEEMTDGDEESHECLAQDLATALQSMTVNEEPKKLLLPPSLWTGPEAIVDADLFSLDRIAYETLSRSGEPRSDDLLLGGGISTPDEEIVTAIKHAKVAAQHNNPHFLNLTWQPRSSNLTALL	XP_007298275.1	1.2e-66	hypothetical protein STEHIDRAFT_89224 [Stereum hirsutum FP-91666 SS1]	No differential expression	Not secreted	NA	NA	NA	NA
Lactarius akahatsu	Lacaka1|MSTRG.8096	2436	304	MFLSCRSRRRKYETTFFFFFFFFPFVSNRCATGRGSLVITFTRVSSHHLYTSWHASTQPASPATLTPRPATHACVRRSSRRRYFHCHRLVALGPTRMSLFSTLCFSLTLFDRAEPPAPATVTTSPQPRHHHTRTRCPSTPLPRHGCDTLNPTDPVTTTTSTPPCCHHLDTAFPLPRHLDTAATASTCCDTFTNIAPLDLHWCCLDTARHLNPTTTLPPALHISTRISAISTQPPPPPRRRRHLPVHPASTPPHRRFTRDSQTDRFTFPCSTCSTNSVYRINKSDVHVYTCTHMTRKPARVFVPV	NA	NA	NA	No differential expression	Not secreted	NA	NA	NA	NA
Lactarius akahatsu	Lacaka1|MSTRG.8429	7581	304	KPVIEILNSWPAFPIVVYGGFPASSSLTAGDQDGIIATLTHPTRVREILTATTPLLENMVTLTQEPFSKLERLHLSTEVGPGLVLPREFGGGFSTLRILRLVGVALPALPQLLSSARDLVSLRLEELPSIGYTLEALLTCLPEVTRLKTLRIHFLSPISRPVLTSTPERRSVLPYLDYIEFHGASEYLESLLSTFDAPFLKYIHISFFNQLIFHPPQCPQLSQFILRTEIQRVPSQATIHYSAADVSVTLSQQGMPHHLALRILCKQLDWQIWSMAELCEGLFQSLAHAEQLNISVPTIPRRTR	NA	NA	NA	No differential expression	Not secreted	NA	NA	NA	NA
Lactarius akahatsu	Lacaka1|MSTRG.9699	3857	304	MWQDERPASTIPQAKQQQHQEEEGYTNMMPSSNDMGINPGPAIVEPSALPQPAEVLAPMGSCNWVVLKAMASLVAGGASATDGTALQAGTTITPDVVGTFSTITDDVAMGVRPSLVPRGGEKDAGGSWDFPPSPGPPFPPGLPGPLFPPGSPPHDSPPPTSGPSPSTSSPSPSISSPSPTTSSPSSFAPSNITLVSGNSVVMPPAVMLWILCIWVIPNILRVVISKVWSKVSHCAAISKVQSCVSQRASFRVHNEQPDRQDCEDKDDTPEYDESIASSTTVICSVDKCPKSSPSLFCKLTQLLS	NA	NA	NA	Repressed during mycorrhization	Not secreted	NA	NA	NA	NA
Lactarius akahatsu	Lacaka1|MSTRG.10045	6923	305	MYHGEWPWLPSANPNTEVVLPKLETVTLQYAPFKWSSPMLRMNLRTLNLRTVPTTSIPIDRVLHIVSNNKTLEDLSLHVTTVLNPVLPLSQTTLPELKTLSVGGHFLMASLVDSLVAPGLCSLTLNIDARDPIDDSISNLVTRSSHPAIHSLSIAYGSNGPPFYGGLIASWGFLNDLNHLRTLQVGGTPLDPLFAMLGAPEEDVLGVMCPFLEHLALRGCPAHSDGVTKLVQMVDTRNPESAPPTAPTTGLGGSATPVKMRRLEMYECTVLGQDVVAWLKSRINDVVCVDPPFERCEYSVVCHWP	XP_007303211.1	7e-94	hypothetical protein STEHIDRAFT_56056 [Stereum hirsutum FP-91666 SS1]	No differential expression	Not secreted	NA	NA	NA	NA
Lactarius akahatsu	Lacaka1|MSTRG.6355	2962	305	MKLFSIAAVNMGRRNAAMATLLETNTRDDLLCVSEPWFGRIGTKRADGKLWGRETLGGANNSKWHLLYPYYTDDKRAKVMIYARKHDREHPGKPNGLEVVARNDLCAHPCILVADVKADKERWRVIAFYNDVEDPTALRALYQLTFLWDGTPTLVTGDFNIHSHTWSPPGWAPSPEARLLEEWCGNQTLELLNHPGTPTRRGTVSQNQRDSTLDLHWRNFAAASKGVFQNTTIDWAGSIGSDHALVRTQAATQGRFRAPNQDTTNAFDLDIDAEDWAEWYRLMELHSPVLRAPPRSSVEINTVLD	EUC56479.1	1.4e-12	reverse transcriptase from mobile element jockey protein, partial [Rhizoctonia solani AG-3 Rhs1AP]	No differential expression	Not secreted	NA	NA	PF14529.7,PF03372.24	Exo_endo_phos_2,Exo_endo_phos
Lactarius akahatsu	Lacaka1|MSTRG.6594	2974	306	MLSRPQDRWPHVFSHSFWAEHPYFLPCLVVAGCGCASFTASLIYLEEVCLLSSVPSNTIHSYQTVNSGPPTRLRPSETETSSDTDTAGEELPSILLPLPPKGSEKPPPLRSILTRPVLISISSYAMLALLSMAAVALIPLVWSTSVEFGGLGMSAASIGLWMSGSGCVNGVVQYAFFPRFVSRFGPRAVFLASISTCALIYALFPFENLASRHTFGGSKVTERLLIVLQLSSLSIAQMGYSKSIPCSWLHAGIDGAHIHQVPYICTFLPPFLTSDRWAQRMALRRRWCRSNAWLGQRQQTGYLHSP	KIP10447.1	4.5e-32	hypothetical protein PHLGIDRAFT_230128 [Phlebiopsis gigantea 11061_1 CR5-6]	No differential expression	Not secreted	NA	NA	NA	NA
Lactarius akahatsu	Lacaka1|MSTRG.4709	2299	307	QLEREPAPELVESSSSALDKGKGKSTAASHQESTESTPLLASRSYVLPGDGDGDDDIESTSQSNPALVSTLTSVFLITLSISILLVLLLLSLAFSYAAQASRISNDDILSDSLVFHGPDAIDVLNISQHGDVWLRIDGRVGLDAGAIIDVKPGDDDSLWLGAWKAIGRWGIRNLDTVSLSLSSINITSQHDPEVFLASIAVPPFQIPLTATPPDDVSWLTPISVPVHIYPSRNITTWLEFVRDSWHSGYAVARATISHADVRGGSWEWWTWRSVLTVSRSNLTFGLRVKGAPTFSLLPPSTKALTVF	PPQ68792.1	3.8e-47	hypothetical protein CVT26_001707 [Gymnopilus dilepis]	No differential expression	Not secreted	NA	NA	NA	NA
Lactarius akahatsu	Lacaka1|MSTRG.6265	6837	307	MNPQQVSQFGNSSLIRSDVAGTKRITPASDVVADGFVARTFSPEDANNYFTLLLRTPRYQHFIRYYGLAYHQGAWYITHNANLVQGTSPGIPFQTTPLLDYSSRTTHGTVVPQRRWTPTDEVDFRRQVDGATLELPIFFVNRNGGIGFRLPDILRGRDRDLHNAEKFAPLGGSATAQIRINVSSPLCYHGQQQINSFLLWQWPGYRSWKRQINTRDETHARNPISMARLMKAVGTSLNNFFRVTILTCPLFSPSIDAFLQECMAHGYVATDPRWQIGSGRITQDHVKVIGVVHVSAGSWMPIIQLTQ	KZV67890.1	5.2e-28	hypothetical protein PENSPDRAFT_754594 [Peniophora sp. CONT]	No differential expression	Not secreted	NA	NA	NA	NA
Lactarius akahatsu	Lacaka1|MSTRG.10755	5751	309	MIPGLLRYEADISVHEEVVLMTTKGEAIALAIALMSTVDLATCDHGVVAKVKRCIMERDTYPRRWGLGPKAMEKKKLVKDGKLGKHGEKIEGVTPVEWSKDYVDYTREVRSVPHRFMFLHFRSMSLSSTPRVNRRIQAWLCLRQRQPPLSDPLRLSKQTHQRNRKRRSGKESQKSGQMYLPRSRTMVWKKMKRNTEKKRRNIRKRRRQMKMRRLGESANVSRRRKRQQKARNPDHLADYLPPLLTSHLSLPGVIPDPLFFAVGVLHFSVENENSKPQSRVHYEARAEQPPARPIIVEEQRLQDAQKKRT	XP_007298991.1	2.8e-50	putative rRNA pseudouridine synthase [Stereum hirsutum FP-91666 SS1]	No differential expression	Not secreted	NA	NA	PF01472.21	PUA
Lactarius akahatsu	Lacaka1|MSTRG.3099	2384	309	MLFLVFNNLQTGQTISKYLHGPYLPVISHSPRRSGRLHWMQYLSWTISTLGTKVGLDPASWGNRSPSSYLMILAVPSPPLSPLVYLTLRPWTLPEYLLLLSVIPLCSKEEEADWEEIARKLNAAINYEPRSAWDCWHRWAVPWCRPQRQAEPRSNTYPCAPGVQHEYDFMDLEGLIDLWTTLTSALGGHGSPSPLVFPGSTIAMAQTRHLTGHTHHPGAHPARFNLPRRLLTSDAAYPQPSAPPNVPARSLGDIRDRGLAAWFTMSVVNTSVLHHVLESQPERTDDWYPVHLRGRRVPPPPYMATSDPR	XP_009551327.1	3.1e-25	hypothetical protein HETIRDRAFT_105902 [Heterobasidion irregulare TC 32-1]	No differential expression	Not secreted	NA	NA	NA	NA
Lactarius akahatsu	Lacaka1|MSTRG.4252	2243	310	PVLYSNRPRKLIRTLRRRSEHPPPPHSHSATEHSATERIQQRATIKYKRELRKHVISFLVTTVPYHSIKRIQRKVRERNKRDQLLRGDVPARDFFGPEDSFDPLEKGAETETRFEFGNIASGNGLEESVLQVAGPDTAGATARIRPAMLGEKIFKSAKGRRDGACPVRIRVGDIVIAAGDSLGESVLQVAGPDTAGTTARIWLAVLGEKVVKGANGRRDGACPVRVRVRDVFRVGAGGSDRFRAFVHVTENTGVEAAGLNVVDGTITFNRFRALVHVAKGTGGEAAGNNVRGRGHTDSVASTANKSADIA	NA	NA	NA	Induced during mycorrhization	Not secreted	NA	NA	NA	NA
Lactarius akahatsu	Lacaka1|MSTRG.6584	3922	310	MIKFLPGDVLLEIFDLFRTDEAEATAPHLQNWYLQKLSRTGLDRSLTAFDTPTFTDARYLPWKWHRLAHICRTWRDIIFASSRRLNLELLCTHGTPVRKNLGHLPALPIVIHFAHPYGVKDSDEDNLIAALEHPERVCNVELYVSCSLLGKLATAMQGPFPALTYLWLELDRGLFPYIPLSRPREEPPVLPDAFLGACTPRLQKIHLVAIPFPPAPTLLLSARDLVEVDLRDIPDTGYISPEAMATGLAALSKRKYLTLGPRCRPPYPDQIRQPPSHRLPFLFSPPLSSAAFLTTRSVFWHRSTSLSSTG	NA	NA	NA	No differential expression	Not secreted	NA	NA	NA	NA
Lactarius akahatsu	Lacaka1|MSTRG.7341	3901	310	MCAWLYWSLFYEHIPEFDKIPPKNLKVLLDCLDLIEKRTGTTIPEGSNPNAQPKLLTLDPVSVWWRPLIYYLVVAFGDFVMKQLLIHVGGMTLGTRHGIDYLVRVPSTWDACKDPTPIVFAYGLGIGLPQYSTIIYGFLTRVPDRPLFVLLQPHISQQIFHPRFLAPKNRKETMVIMRQLLADFGWVPNPSDSRNGASDGRKPKGITLASHSNGSYVHAWFLKDAPDLVARSLYIDPVTFCGWEGGMSLLFITLSLLDKLYSRVLPKRSVSQVPLQPCHECECITLCSTYGSKLTRVSFIGASAHNELLC	XP_007302432.1	3.9e-68	hypothetical protein STEHIDRAFT_76757 [Stereum hirsutum FP-91666 SS1]	No differential expression	Not secreted	NA	NA	NA	NA
Lactarius akahatsu	Lacaka1|MSTRG.8768	17109	310	GRKWWQKADDPWQCLATCMELKAALDSPDPLAYECSLPVHQDGTCNGLQHYAALGGDARGARQVNLDITDRPSDVYTYVANMVEKRMREDLEQNPENKYAKMLVGKIARKVVKQTVMTTVYGVTFVGAREQIERQLKDRGDVPLEDCYLAAAYLAKQVRISCPFPQENTVFDVLSQVLQCIGDLFQGANDIMNWLTACARIISKSVPGDRVFEAMELDHASKSKKVKGTTTRLRKEQMAAVVWTTPLGLPIVQPYRKVKRKQVMTSMQSVYISDPNAPAEGEPPFPAYNDCTTYNYLCSKLTKAGLGFPA	XP_009548352.1	4.3e-107	hypothetical protein HETIRDRAFT_477423 [Heterobasidion irregulare TC 32-1]	No differential expression	Not secreted	NA	NA	PF00940.20	RNA_pol
Lactarius akahatsu	Lacaka1|MSTRG.9566	3941	310	MCAWLYWSLFYEHIPEFDKIPPKNLKVLLDCLDLIEKRTGTTIPEGSNPNAQPKLLTLDPVSVWWRPLIYYLVVAFGDFVMKQLLIHVGGMTLGTRHGIDYLVRVPSTWDACKDPTPIVFAYGLGIGLPQYSTIIYGFLTRVPDRPLFVLLQPHISQQIFHPRFLAPKNRKETMVIMRQLLADFGWVPNPSDSRNGASDGRKPKGITLASHSNGSYVHAWFLKDAPDLVARSLYIDPVTFCGWEGGMSLLFITLSLLDKLYSRVLPKRSVSQVPLQPCHECECITLCSTYGSKLTRVSFIGASAHNELLC	XP_007302432.1	3.9e-68	hypothetical protein STEHIDRAFT_76757 [Stereum hirsutum FP-91666 SS1]	No differential expression	Not secreted	NA	NA	NA	NA
Lactarius akahatsu	Lacaka1|MSTRG.8583	1504	311	MLPSSTAAPRRKGPPSGLRIDTPTQNATIALVPGYSSASTSAVSPTTSESGSFHFPPPPKSRSRNMKKLSLTLSTQSSSSSLAVPPSDFQLDHTTHEARSRRTSIVSASSMLLRKEEDGSPTAPYPDGPIEILPKIWLGAEDNARDWRGLVTRGIGSVLNVAKEVFSAFDSLTPEVQRTNELPGGATYYPADGTGRPGLHYLKLQWSHGQSDLVKRGFPEAMAFVDQSLARGEGVLIQCVAIDLLSRIHFDIYYNASPAVSAVFLDPLPWRSRSLCAPLLSVPLGFPNKFGTSKECMPLMHMSNKKVNGSA	XP_009541345.1	1.6e-53	hypothetical protein HETIRDRAFT_407088 [Heterobasidion irregulare TC 32-1]	No differential expression	Not secreted	NA	NA	NA	NA
Lactarius akahatsu	Lacaka1|MSTRG.4382	2817	313	MALRSTEWAFARKPFRRYEPLAEGQSTPVERPLTIPNIILDAFDLLSNQRGIRWSWGPKSFLRTRPPPPSLAAVVLKLLLKLTVFDIAHYIVQLNRPSVDTPAGDTLFDPLLDPLPRAALGTFFTLCGAIVVYTTVDAMYHAATLVGRVLLRQPAADWPALSARPWTATSIVDFWGFRWHQFFRHVFVAFGARPGGALLGQPGALLGAFGVSAVLHYVGVWGLGRGTEFSSAGAFFVLMGVGAVLERVWQHTTGTRVRGFWGWAWTMSWTLFWGTFMIEGWARRGMIACDFFMPGLRPGKPIVDGIIALITNK	XP_009545475.1	3e-76	hypothetical protein HETIRDRAFT_126468 [Heterobasidion irregulare TC 32-1]	No differential expression	Not secreted	NA	NA	PF13813.7	MBOAT_2
Lactarius akahatsu	Lacaka1|MSTRG.6532	4258	313	MSTHALGTPPSCPVVSLEKLLFEYPGADVILRSCDSYEFRILKMYIFHSSPVLGERVLAADNPQPGIAIPSDIAAASLPVVRLPDSGAVLFSILAYIFPVQPILPSTVEQVMELLSAIQKYKMDAVLTHVRNHISQQHPPFIRKENSLYVYSLAQKHGLRQEALQAAQSTLGLPYLTIDGLDEKLKMMPGVFLHELWKYHKRVRANLASDLKDFMASHAHTTFNHPCREPTAPPNLAVPGWVGRYVSSLSSFPFLFDISGLHMALTDHVLSPSGSQLRASGGCTCTMIPKENILEFWAALSAVYHGSITKVSQ	PCH36287.1	8.1e-13	hypothetical protein WOLCODRAFT_140317 [Wolfiporia cocos MD-104 SS10]	No differential expression	Not secreted	NA	NA	NA	NA
Lactarius akahatsu	Lacaka1|MSTRG.9341	17268	313	MKKTVIKRRKRVPAASPAGRLSDQAAAEALVSVGRGMPAGTGDEEEDEEDSPAPKRKRSRRSFPRAKRCVKSKGSKDGDDEGGDSEVQQNWEMADGTRPSSRGAFVHPPHPFVPGGFELPPLGPTLGPGTDLSGVLAGFAKTAFHNPASYIRSGAPSRTHSPMQGGATGYGPVGGYGFPRGHSPVLMSGGVPTVSELERHYYELHEHRNGLMEFLERTDRLIAGVKRGLDEMRGSSESTTQPPQQQAPPQQSPPQTQAQPTSDGQAPSQNEGTDGAAAAASVPLQLPRSSPGSPRSGRESVWPVSTATESARD	XP_009549408.1	8.7e-31	hypothetical protein HETIRDRAFT_445867 [Heterobasidion irregulare TC 32-1]	No differential expression	Not secreted	NA	NA	NA	NA
Lactarius akahatsu	Lacaka1|MSTRG.7113	6141	314	MACGEAPGDMDSFTLVDWRAGSGNNVSEHVHLSAHLCEANQVLSCPANTYAPSFCFIDHETVAHVHLLDNAIETRKILVASDGEIYLRRFRRFDLPFATMHDCRLLDARWSGDHPCITSPKSDRASRLPFQSRLESSVVALTLSYAARGARDQRSFRAIIPRAKLLAGVWDTSSFRLFTLGCQAPACSSWTGGCSISGTRWINQCLQVFDFNAARVRGALAWKRATTATTTTATASPGLPNPIVHATDVPAAPGFERDVSSALPFCHTFPMNQFGDVYDGVLADDERVVAFRYKVGPPGDFHFVGCMLTTERPV	NA	NA	NA	No differential expression	Not secreted	NA	NA	NA	NA
Lactarius akahatsu	Lacaka1|MSTRG.8237	10635	314	MDGLPPPPELSSDIQRALQQAIGQANNAFINHRVADQSMPTKRKRTREKPPVEGVEVVNQKKRKKRIAEVVHTSPQGSPFLSAADQPGTQSKKRRKASSKQSTQVTTEVSDINELPVSSSDTSSQSQPPTAFLNAIVAAASATAAPPGHSSDFSHACFDAPSSSSFPYSTSASDPPPNAAAFQPPVSFSTVAVPDLEYASNDDILRALQDLDVTKIATVLKTLGEAAAAANIPVTSLSSIITQRPLPTPTRTTPSNPVVINERPMRRVSQHNRRNANGSSQQELLAHSDHADLLATKWLSANKLAELARTQGEY	AXB87532.1	1.7e-18	MYB transcription factor 13 [Pleurotus ostreatus]	No differential expression	Not secreted	NA	NA	NA	NA
Lactarius akahatsu	Lacaka1|MSTRG.12628	1880	315	LRCLLGKFLDTRRLQQDPVVLCCFLGLAILHLVLNISIGHSGFVASLFRTILDLCLSQTLQRPVEVRAIVSSIPLDVQTIFGILNLRTHTLPFVCCPGCYKLYPDSSECPDLCTHRPAPDSEMCNAPLYSKRTNRGKAKRRPVRRFLYHDMKSWLADMLSRRDIEAHADRDVFSDCCNTSLERRDIWDGNVLRNFKGPDGELFIQPGSSDGRYVFSLCMDGFNPFIMKEAGKKVSVCAIYMVLLNLPVDIRYQVENMFLVGIIPGPLSLHWSRLTTFWSLWWTTSYNSGSRCLHKTNSALHWGASVFFGAYPPSL	PSR80953.1	3e-39	hypothetical protein PHLCEN_2v6588 [Phlebia centrifuga]	No differential expression	Not secreted	NA	NA	NA	NA
Lactarius akahatsu	Lacaka1|MSTRG.9361	14171	315	MVPPLFKELSVRHPVVIHHPFPALSTSSGLPYAMSRAGFVTGLFLLVVLCYVTDWTICLIVTNAKLSGSNSYIGIMNRSFGASGRAAVSFFQFSFAFGGTYTCSQSLARASHHPLQECAHSGLSSVSISFQNPLPQAYSLAGDTIPHVILSIFPNLPSVPVLSLFADRRFIIVLCTVGVSYPLSLYRDIHKLSIASSLALCGMIIIVGSVIFEGPLVSPLLKGDPSKRFSFIEPGIFQAIGVISFAFVCHHNSLLIYGGLKTPTLDRFATVTHVSTALSFVACTTMAVAGYIVFTDRTQGNILNNFSPVSFLSRL	XP_009547277.1	5.9e-96	hypothetical protein HETIRDRAFT_154839 [Heterobasidion irregulare TC 32-1]	No differential expression	Not secreted	NA	NA	PF01490.19	Aa_trans
Lactarius akahatsu	Lacaka1|MSTRG.11990	10685	316	MTAPGPTIKTFQKRLYTVLPRGVAVTRARSNSATASSRALHNYSPSLHYFDPSTPTPSSRPGNPHLPSTTRLPIEARTEPEAPNSGHSQHTHTGHAPPSSIALTSPHSSNPVSSSQNGIPLANFHAPPFFLYQPFTPPSSLPPSAVLDSCSLPPHASTSKLRFHFDVGAYGIPKFRPSNVISGRDGVGGGEHWSHNSKLTEGLDLAVQIGEDAYFVRDNAMGVADGVGGWSRTRVLSISFSHSWRIHPGSRFIERRSISVGALRPSSHALLFRRGSCTGFLRCCFFPRCATVVEDDVLPLSGAVFAVTVDDPGRPE	XP_007306242.1	1.9e-41	hypothetical protein STEHIDRAFT_169952 [Stereum hirsutum FP-91666 SS1]	No differential expression	Not secreted	NA	NA	NA	NA
Lactarius akahatsu	Lacaka1|MSTRG.1241	1671	316	QRMLPYVGRHAHGPQDTRPLQSVLIHGYASCVNILAWPVPDIDVEVHNPPTLFATTHSPRVTLSITSNVWHYTSKIHFEVLDVAMAALPLDGLVMFTAEHLGGSDSSPKMDHFWLRYAPRWPLLRRVRLGYSTEQGFITMLLEENGGDESPLLPSLTGLVVVHARVNDCWTNRLCDALMRRVEQGVPLEVLDLRMCILRFPTAVQLLSEIVVDVLGPSDEITLEWEQNLNMWSPIIRSLEDDNSGAEDDSDTDTDGDSHLACQGLMAGRNSLQLQINTYTVKLDTNTVKMDVNIECKYRLPVLNPGKSVMNRNSVT	NA	NA	NA	No differential expression	Not secreted	NA	NA	NA	NA
Lactarius akahatsu	Lacaka1|MSTRG.2722	6749	316	MSTNSLPSASSPMGNTHRRSLTLPRGNPVSSVLITSALETIAASREAKKSKPLRESTHRALELVRSDLAGDQPRDVFEPLRLACETGSEKLMIASLDCITKLVSHAFFVDDSSHVASLPSPPASPAPGRRDSHSSIPEPSLVDLVVHTITSCHTETSPDTVSLQVVRALLALVLSSTILAHQSSLLKAVRTVYNVFLMSNDPINQTVAQGGLTQMVNHVFARCRTVPPFEHLSRESVADAGASAVSSGRASVAPSTPDSIPAPSLPTEDGASSVSASRNSSEAETGSTLIIQEEHGEQGATVSTPSEVPEAYPSHL	XP_009543378.1	3.9e-79	hypothetical protein HETIRDRAFT_432775 [Heterobasidion irregulare TC 32-1]	No differential expression	Not secreted	NA	NA	PF16213.6	DCB
Lactarius akahatsu	Lacaka1|MSTRG.7917	3170	316	MPSPLKLYLAIDCGGTKTAAVLCLSSGDTVARAVTKGSNFTYLGLDVFLESIQATVSSVLTAALQSPTPVALPVDPTTHVDAAGASTPPYNLQAAWLGVSGVDSSATISLLLPRVSTLLSVPIERLIISNDTHLLAAPLRLLLDVETAVVVVAGTGSIVSSFREGPGDALPEALARVGGWGWILGDEGGGFDVGRTAVRALLAQEDSETTGAAVTRGALREKVLKKFGVAEVVELLAAVHASDSTGSLPREKRLSSLCPLVFEAAFEDGDPIAVQVLRDCAHKLAKQISAVLLSPSAKEVRVHPVSSSDVRDQLYQ	KZV74378.1	3.8e-74	hypothetical protein PENSPDRAFT_573016 [Peniophora sp. CONT]	No differential expression	Not secreted	NA	NA	PF01869.21	BcrAD_BadFG
Lactarius akahatsu	Lacaka1|MSTRG.10334	2567	317	MLLADITALPSVTVLITMRGGERPKRTAWTLPMLPPLTNFPRDAAKRTWESLAGTCDEWAEKLIDAVDCLPLAVTLLGSLAEVSTAETLWERWQKENIALVEKEKGDKLSSLEFSIELSLESSRMAADGSSKRLLGILSLLPDGMPAFPSPEFQRLFPDVPDIPRSLDTLLKCSLAVRTADKRVQVNSLVRLYCERNDLATAEDRRALRDYYVTLASHGYDNLSHELFKRMTMEMNNMESVLRKSLTLTPLSEITPVIEAVIAYTQFCSYIGNFSDVVITSATNVQGLPEETLGDCLTSLGSICLSDDNVAQAGRAL	XP_009549438.1	2.2e-42	hypothetical protein HETIRDRAFT_420345 [Heterobasidion irregulare TC 32-1]	No differential expression	Not secreted	NA	NA	NA	NA
Lactarius akahatsu	Lacaka1|MSTRG.1711	2571	317	MYYDDDEDDNLYAPRTGPAAMPSPRSKFAPYYSGHADTFEDFLEEYEGLAYDCALTDPQRVDVLIRYVAPSLRDFWRSLNGYHSRDWSQLRQSLVNIFGNPTPRHQIMRQKLRSYVQESSRSRMLCEDDVLRYYRKFICFGIPLVHTGHLSEEERNAAFWYGFHPDDRQVLRPRLLSKNPYQLPDIPFHFEDVLSCARAAFAYDDYFPSPWSHVTQFEPPSLRRERPVVESAPRRDAYSFRAAVATYAETTPDELSLSSHSTSDTQPPSSSSYSASESQHTQAPSVTLDQPEPAPTLSTTLLPSVSFPTPSHASHQP	KZT31598.1	5e-10	hypothetical protein SISSUDRAFT_973852, partial [Sistotremastrum suecicum HHB10207 ss-3]	No differential expression	Not secreted	NA	NA	NA	NA
Lactarius akahatsu	Lacaka1|MSTRG.4317	9508	317	MPISSCDAPLLCSKYPFKCQQVSNSTVEHNFYCDSDSIASHYVVSTMRLHHCSHIYVASCSLLFRISNQCDASRRPISPSFHWSMRISAKMTNSYKRWFRSYSNQREPSHSSFSDRGSMFTLQLRSLLTPCLSPGTGKTSAVVESIFQLLNRDPRFKILACTPSNAAADLLDERLSAGGLDASQLFRLNAYSRYEEDISEDVQAYSVFQKRAKLLAFRVVLSTCSSAGFLQMENFPVGHFSHIIIDEAAQAEEPLALIPIAAFSNEDTNVILAGDPHQLGPVIKSSAASDAGLGKSYLERLMRISKIYGLDTQAGKT	XP_009552018.1	1.6e-40	hypothetical protein HETIRDRAFT_390120 [Heterobasidion irregulare TC 32-1]	No differential expression	Not secreted	NA	I01	PF13086.7,PF13245.7,PF13604.7,PF00580.22	AAA_11,AAA_19,AAA_30,UvrD-helicase
Lactarius akahatsu	Lacaka1|MSTRG.6261	4609	317	MFLFLFIFTQHTYYDSVLETFAGWPSAELPVISVVEDLVDDPTGSSAQPLSSFYLDNLSSPLLFLTRVLRLRIPRLEIVRFLRLSRWRLVLPRITFLDLSTCCLSDLDVSELLHSLPRLRHLVLDHCNLFDDAHTRDWAVFGHHCMLAGKDLNLERLVNRRLALGGASGTGGSHPREVRILPRVSALLSLSLSVPAHVDADARRVLLAEFQRGWAEAATVFNGIVSAARRSRTEEGVVTYRFPWPGEAGSALPVREYSFVGMMVVNDNDEFSQLSEVRGAEGCPVVCLAGRSGKEEGIEHAEGYGHSIGWDIWQDTL	EMD41864.1	1.1e-25	hypothetical protein CERSUDRAFT_120779 [Gelatoporia subvermispora B]	No differential expression	Not secreted	NA	NA	NA	NA
Lactarius akahatsu	Lacaka1|MSTRG.6925	1821	317	MTIDARPQTLPFSIENAFTDRLDGGNPAAVVRVPSLTALPDATLQSIATNFNQPMTVFIAPRETSADDISGTATFGIRWFSPEIEVPLCGHGAVAAAASVLHGAEDARSPSAIRFEAPTGKFLIARRVEGGRIEIDLDAGHSEALVGAEDAQLRGVFARALGEHVRVTYIGRGLGHMDQYALVEVDTHDLKSLKVDIDALVGLSRLVYGPGVLIGVWGQRDSPFMVNVVVAPSSVPGVAFESRMFAPRAGIPEDPVCGTAHALSTPYWMATKELSGVINARQVSSRGGELRIELDVGEQRIKLAGQVKTVSKGELFT	XP_009542234.1	7.8e-72	hypothetical protein HETIRDRAFT_438246 [Heterobasidion irregulare TC 32-1]	No differential expression	Not secreted	NA	NA	PF02567.17	PhzC-PhzF
Lactarius akahatsu	Lacaka1|MSTRG.10727	2507	318	PVSQVSRLPPRRRANRGVEPSSALLSSNPEPLPSQPAQLDKYKALFDASNPDRAPSETQQTGSTPVGMLSAVPEEQESQSLNQGGDARGTKRSRADDDTEMADAPAEAGGNAEQARLLKRRAVDANAIQQSVATQPKPNSTSTQTQNSGAAEAAATGIKRAGAAKPPSLAKSPTTNKLDTDENFLRAVNSMKRGKKHEDEFDREFNQLRITNPKAKKKQDKDQIEAAVVTATTGDDGAATSRPWDAIDDFGDVGLRGNFMVVVEMDVQRGSVRSTLAARSQDGVKSEWVGRSNFKKFKKVRIALCSISLDKIVDWRVI	KII90317.1	7.2e-25	hypothetical protein PLICRDRAFT_106044 [Plicaturopsis crispa FD-325 SS-3]	No differential expression	Not secreted	NA	NA	NA	NA
Lactarius akahatsu	Lacaka1|MSTRG.4737	5570	319	MREPFPALTNLRLWSADLGATAPIISQGFLSESTRLQKITLGSISFPTLPNLLLSCGDLISLRLMEIPNSGYISPEAMVAGLSSLSQLKTLEIGFSSPRSCSGKRLPPPSIRSTISTLTEFTFKGSSEYLEDLVARMDTPSLHEFDILFFHQLIFDVPQLSQFICRTEGLGSPDKATVLSSEIAVSLRLLQVARSAGSPIVRSFSLNIPYKDLDWQISSVAQICLQSLPLLSGVKKLSIDSTAEQAGWQGDMGPAEWHRFFRPFTAVEELCVSEPLGSQIALALAGATRQAEIQMLPALRSTSFKEPLGFTSVPEIFEP	NA	NA	NA	No differential expression	Not secreted	NA	NA	NA	NA
Lactarius akahatsu	Lacaka1|MSTRG.6922	1386	319	MTGSSVMSEYSLRIVSDLQTQVDEVQNLRRDLGIMRQLYTEFMKQTKATLTGLRTQTQAVRQMASTQVPGARSYIDAGKTKLDARSQNVLTKMEELQDTVEGVKDDVLKRHISPKPQVLRAIKEDLSTVGAELQSLTKHISTVKPMWKKTWEEELQSIVEGQQFLNHQEEFHPIEDIDRKAVAEVYGHVEKVISLRSASGAHGARGRALKMLEIRGATVDPEQRVKATEASQKNRERELADRADEFEELKGFVGGKKLKVTGRTEEAERVRRAKNDLSLTIRGCLGRGLAGAIASCTFASLLIGAIISIVVAYKLHILF	XP_009548753.1	1.7e-103	hypothetical protein HETIRDRAFT_49645, partial [Heterobasidion irregulare TC 32-1]	No differential expression	Not secreted	NA	NA	PF03915.14	AIP3
Lactarius akahatsu	Lacaka1|MSTRG.8685	1731	319	TRRVTRTTRTTVLKDENANARSRVVTRSKPPSSSTVNTQTALSNRLTAPTLSTRPKAVVAKDAQPEDPAAQGKRKRATLGEVTVNKPKARATTVDKGKGKEDATAAPVPPGKFAGVVIKSKLPTTTTTAPAPRQVRKVSAPAPHPDPAPKRTTRASAAANHAVNGVKEKPALHVDAMVIDPPELHVPPHRVNGHSRKPTSLAVPTRRNPPIQEERERDDVEAESNRVFKKRRTSSDAPEQPDEEAKEEVEVEDQVQDIAERELQKHLHNIEHEVEADPNGAEGEDLDAEDADDPMMVSEYVNDIFEYLKAVEVCSLVPP	XP_009552161.1	3.3e-38	hypothetical protein HETIRDRAFT_245294, partial [Heterobasidion irregulare TC 32-1]	No differential expression	Not secreted	NA	NA	NA	NA
Lactarius akahatsu	Lacaka1|MSTRG.8883	2238	319	MSAFRSRLDRIFEQIIGAQGMKQSTRMHLDDSLLECFSRLSPKCKDEELEDLVYFILDLYQFHGVQVAIAEVDVDHVVIDLRMALEEHAARARGRASLQEDEHVFLVLNRNLQEIPWESLPILLGRSVSRVPNIDFLVDRLEFARRRDQSTATGQGSGQYEGRTRLDLSSTYYILNPSGDLESTERRFSPWLRSMRGVGWDGIIGRTPSEQEFTHALAKNELLMYIRPFAGCEAHSNVLVSVISVMEAGSSIYDHTRSGTYLGVRPPCSGVVPQACCGTWVNLTASGRHTTTCLQDGNVIFSHSVFPSILTKWTTAAQL	KIM86091.1	7.1e-73	hypothetical protein PILCRDRAFT_816630 [Piloderma croceum F 1598]	No differential expression	Not secreted	NA	C50	PF03568.18	Peptidase_C50
Lactarius akahatsu	Lacaka1|MSTRG.10034	7012	320	MRFLLNPLILSLTASFNQKCYISLIENLNIEDVHCIKYSLSKGIGVAIVVGGSIMKVPQLLLSAWLTCCRVFGSDNPSVLRAQSARGLSLTAYVLETFSYAITLAYSSRNGFPFSTYGENLFLTVQNVIITFLITLYSASSQPLTAAPNPTGKLLVAVLATFAVGFALFAAPASALAAAQLGTLPLSLFSKFPQIAQNYRARSTGQLSAFAVVSQIAGCAARLFTTSQEVNDPLVAAGFALALALNLIVGVQMYAYWGRGVGQDSAAKVRDEISLGSAKEVYVREKVDVVVQPQSPLPQQATHQHTQSAAYGRKWARKVD	XP_009545958.1	9.3e-89	lysosomal cystine transporter [Heterobasidion irregulare TC 32-1]	No differential expression	Not secreted	NA	NA	PF04193.15	PQ-loop
Lactarius akahatsu	Lacaka1|MSTRG.10782	3530	320	MDPNPLDTPGGEGAGPQVPPLEVLATMPPQEAFTAIQTVLHDIDRRISAAESSIVTSQNLQNIIQSAFSNAHLTINAGAGVLPMQTPAYFNPPEIKLPPFCGKDTENIRIWIGVTEDALYASGLPRDKWTCYAALMLRDAALLWYHARRMANNDQAPHWDDLRQAMLGYWDDPARIDGLRLCLDRITYCGSISDYVRLFQGVEIQIPADAMPLDVRKHKFLGNLPAELGMELDQQSQSDMESVYLAARRWESCRRAARAVAHFHLGGSRNRRSRRDTPVPSIYQNSHDADAPTPSPTTAPPGPTTVRRDSRSLGRRPPRL	NA	NA	NA	No differential expression	Not secreted	NA	NA	NA	NA
Lactarius akahatsu	Lacaka1|MSTRG.5452	1954	320	MDPNPLDTPGGEGAGPQVPPLEVLATMPPQEAFTAIQTVLHDIDQRISAAESSIVTSQNLQNIIQSAFSNAHLTINAGAGVLPMQTPAYFNPPEIKLPPFCGKDTENIRIWIGVTEDALYASGLPRDEWTCYAALMLRDAALLWYHARRMANNDQAPHWDDLRQAMLGYWDDPARIDGLRLCLDRITYCGSISDYVRLFQGVEIQIPADAMPLDVRKHKFLGNLPAELGMELDQQSQSDMESVYLAARRWESCRRAARAVAHFHLGGSRNRRSRRDTPVPSIYQNSHDADAPTPSPTTAPPGPTTVRRDSRSLGRRPPRL	PIL34997.1	2.3e-10	hypothetical protein GSI_02784 [Ganoderma sinense ZZ0214-1]	No differential expression	Not secreted	NA	NA	NA	NA
Lactarius akahatsu	Lacaka1|MSTRG.8599	2062	320	MQCHKAGPSVATITSGCTPVPPTLHGCTEERSPVSPLELEPSAPPFSSGSTVSRFMDRLGVNAPSLSSLRTIPSWRSSPNPDANKIYAKFHIQYSSEESDTPSQPHSRGARPHHPSVGSLQHQYLRHRRQNRRLTNQNGGHGPLHPSVPPSNLLEHFSHSTMRRHADPSTSSSSSLSTQPSSSLDSHVLFPSTSEESYPSPYSADALAVFHPPTDKRGLSFFKGRRRHEDILEDRVQVIFEEATDATSTTAGVSSAHSLAKRRGRIGRLRRRVRALAESMSPPRSKTSTKFSNERRSPHLNDYDSEEHDIPCLAYISCIW	NA	NA	NA	No differential expression	Not secreted	NA	NA	NA	NA
Lactarius akahatsu	Lacaka1|MSTRG.8928	964	320	TYEHMLRRIDRVKRQFAHRLFQCLAVSVRQLRVEELAEILAIRFDAGSLSQFNPGWRLGDAEEAVLSACSSLAIVINVNGSRIVQFAHFSVKEFLTSDRLVAASEDLSCYHIVPHLAHATLAQASLCVLLQLDDRMDKDNVTNFPLADYAARHWFEHGRFETVSLTIRDATECLFDREKPHFSAWVWIYDIDDPWRKPTPTKRPECPEALPLYYAVLCGFRWLIEHLIATYPGDVNSRGGWHQTPLLAALMMEDADTASLLVRCGADVNVLDNEGWSPLHRASFYGRVEIVRFLLEHSADVNLQGYKHFTPLTLASRVGE	OCH92518.1	2.3e-47	hypothetical protein OBBRIDRAFT_426819 [Obba rivulosa]	No differential expression	Not secreted	NA	NA	PF13606.7,PF12796.8,PF13637.7,PF00023.31,PF13857.7	Ank_3,Ank_2,Ank_4,Ank,Ank_5
Lactarius akahatsu	Lacaka1|MSTRG.1533	7557	321	MDGRSRVVQFSHFSVKEFLTSNRLANSLKEESRFHIRLESAHTILAQASLSVLLRLDAQVNRDSITGFPLSQYAAEHWFDHVNFWNVLSHVKDGVDDLFDADKPHFAAWLWLCDIDNPSVSVRGTSPEQPKASPLYCAVRVGNRTLIEHVLSKRPQDMNAKGGHHGTPLHAAIFKEDVGIVWLLLQNGADPNIRGNSDETPLHGASMAGFPDVVRWLLDRGVDTEAQQNDRSTALHLAAYSGHLAVAEILLEHNAEVNASDNYSRVPLHDAAFNGHLELVRLLLKHRGNVNARGKDGMTPLDEAKEHEHTEIVQLLSEHVN	OCH87556.1	9.2e-36	hypothetical protein OBBRIDRAFT_735932, partial [Obba rivulosa]	No differential expression	Not secreted	NA	NA	PF12796.8,PF13637.7,PF00023.31,PF13857.7,PF13606.7	Ank_2,Ank_4,Ank,Ank_5,Ank_3
Lactarius akahatsu	Lacaka1|MSTRG.3179	5907	321	MDGDSQVVQFSHFSVKEFLTSNRLASSFEEESRFHIRLESAHTILAQASLGVLLRLDKRVNRNSIVGIPLAQYAARHWIEHVKFENVLSHVKDGVDDLFDADKPHFAAWIWLYDVDSPSVSMRRTSPKQPEGSPLYYAVRIGNRALVEQVLSKCPQNMNARGGRHRTPLYAAFDKRDVGVVWLLLENGVDLNIRGGGDQMPLHGASIAGFPHVVRWLLDRGVDPDARQYFQSTALHLAAYCGRLAVAEILLEHNAEVNASDNNGRVPLHNAAHNGHLEIVRLLLKYGGDVNARGYEGMTPLDKAKAKGHTEIVQLLSEYVN	OCH94796.1	8e-32	hypothetical protein OBBRIDRAFT_746651, partial [Obba rivulosa]	No differential expression	Not secreted	NA	NA	PF12796.8,PF13637.7,PF13857.7,PF13606.7,PF00023.31	Ank_2,Ank_4,Ank_5,Ank_3,Ank
Lactarius akahatsu	Lacaka1|MSTRG.6191	2053	321	MGRLTSSFIFVRKEQSKTEAHHLFTNLARNLADRYPLFKTALGRVVKDNTSLRLDTRDYGTLFRHLIQEPLKDLHIVGPILVVIDALDESGATTGENGLHRFLANHLSELPYNFRVLITSRPEGEIEPAFLGAESVVMKYMTDDALGATTHHDILAFLQKALASDDFIQYGKALAGRAEGLFQWAAVAAGYIQEPMSVGGKRERIKHLLQLAADHHGQDPLDELYNRVLEAYFKNEKPVFRFLVGQLLAAFEPLSIRSLTTLLRHAPDDDDAPNSVIAALSRLGSLLSNVTSSDDTLPIVPLHTSFRDFVTESREKRRFLR	KIM45626.1	3.4e-75	hypothetical protein M413DRAFT_344802 [Hebeloma cylindrosporum h7]	No differential expression	Not secreted	NA	NA	NA	NA
Lactarius akahatsu	Lacaka1|MSTRG.8443	4487	321	MAETLLAIVLVTSSANGSSLICRWPPSPQSSPRLARPRPSASYDPDQYDDPWRSANFQEVCALDPPRHAHDEWEYIWQRPHAARDRSHSFSRSTSHSTPSGRASPTKDSGVLYDGALYDLDDAPADAPLHDEYGALFGYAAEFLAGLLLPKRAMCHQKFALAVDDLFFVGHPVCGDADGIWRFKQEKDVRGRGARKRRVSGDDVSSSTEFDSAQENSSPPPPPSWLQTFHVAFVHEVPDPSSSASGNIGRYFDVIYQQVAFTLTAVLFQEQVLSNFVEKDCDVLCALKDEFASKCACFRATLSAPWLIHPFPSQLGHTKST	XP_007299935.1	1.3e-87	hypothetical protein STEHIDRAFT_91140 [Stereum hirsutum FP-91666 SS1]	No differential expression	Not secreted	NA	NA	PF03666.14	NPR3
Lactarius akahatsu	Lacaka1|MSTRG.9832	18349	321	MATRVPSADRATCAFQGVNVVNDDPRPARRRIRLAVKHIWNRLYPNETFLVFFFFESIIVRIGVHGPHFDIPFTPCTDNPSTFQPLYIRTPPTPVEERLCDVEFTGARAAPGRRGGFEREVFRCAWVCSAFHLTPCWDYPSGPGVLRRPFALHSFIPRGGSSYSITTATSNRVYLITNTSKFLYTTNTDRPCDHENAPKPLGTPLPSRSKSSRSGTTPDNGRTDGGNNHRAKYPSRNQTEVDIGGDIRRNCTRARDKGLLVDPSQTPCESYHDKAAMLLLYGRRPTVAGRWVELFTHTLSGLPSAPSTCWVRNICAFAFDS	NA	NA	NA	No differential expression	Not secreted	NA	NA	NA	NA
Lactarius akahatsu	Lacaka1|MSTRG.11453	1759	322	SAPFTESISIQPSKMEWHPYLSGEDQDGLLPPSSPPIIQPSSPLTVLDRSEDDPPTMRASSGSPLSSPPESPTPAPHSLVFSLAPGLVLNNRCLEAGGSEDSFIPSSPIRSRDDMRRKAQKKRDEERDARTKQAQEQEQQSRTIAFKECLDILSANKLTFAELTEYVFFHENQTPDWRYENFFINRGLVTRLLDFFVSSKVNKTCREDVRDWAESVVLQTIKKEVNTVTQSGDLRITEREIDSSFASGLSFDELKAMVRQHCPIFLRLLVNIITTGRQARSVSKDRLTAKEHVRTCLGQLQCANLHLIIGSCFRYSQPAWCT	OJT13438.1	5.8e-14	hypothetical protein TRAPUB_10009 [Trametes pubescens]	No differential expression	Not secreted	NA	NA	NA	NA
Lactarius akahatsu	Lacaka1|MSTRG.5458	7490	322	MTNMKRPQADSTLALVKEEPTPEKSGIPFSPPCLDVPDANIIIRSSDKVNFRVHKSLLAMSSPFFSDLLSLPQPPDGELVDGLPVIQLSEDADLLNSLVSLLYPISPYIPGSCEHAFALLAACQKYDMTSIQSYIRAEIKRWPSTPIGAEAFRRYAIASSLGLHPETESAARLTLGHPMTFETLGDGLRSFKGRALCDLIRYRKHCRDNLMSCLNSFFDPNSRRQTWAGCREGSSYPWLVNFFTSKSAEMRGSEGFMRGIFSPLTIREEFVVALKNDTQSGCYSCPRVHLDGQTFCKELEKEFSRELDEVNTPFHFEYFKRS	KZV63624.1	3.2e-20	hypothetical protein PENSPDRAFT_757809 [Peniophora sp. CONT]	No differential expression	Not secreted	NA	NA	PF00651.32	BTB
Lactarius akahatsu	Lacaka1|MSTRG.2639	1888	323	PIHRPNYEEPPPDIIDGEEEWEVEEIRGERTMGRRKKLQYLVRWKGYAEAHDSWENAEDIHAPDLVQQYKSRQCRPTLNINTLTMDPLVQPHLHHPPQHYFVPDEELPVEIRQDIDRRINEWAWVPTDHDIRADSPTTQDDSIGLFTYSETNGRRRRHSRAHARRRERLRREAREKLALEDIHELGVYPADVPPPLVPRSSPPPEIVSISTGETSTREDGAWDEEEQDVWEGAFQSPPAFRLAEPVAPEHPGPGWKVTRQTELYKFDTSSTFCSAMALKGAQPLTSGLPSTRRTSPSLWVLKARGCPSITNHSTQYPCPLVLP	XP_009552737.1	1.3e-10	hypothetical protein HETIRDRAFT_243116, partial [Heterobasidion irregulare TC 32-1]	No differential expression	Not secreted	NA	NA	PF00385.25	Chromo
Lactarius akahatsu	Lacaka1|MSTRG.6665	3442	323	MSNDDDVGFLSLAHNLRSRIDNAFHTALTSDQRGSGTFTVGLTHDTPGGFLLDDDDSMAGGFLPPSPPAAVRGSRNECEGDERPSYIPLSRIPHALQLLDLPPDDEDVLAVFRNAATGWGDDHISAPGSTRRGRNTVATSEEGDETEERVSLRDWRAVCAALMDDGRGEEGVEEGGDVDIEEDDDAGDIDQNSSSGLGESSSDEYHDTSAVAKSRKRPRKSTSASTPDHKVTRKTRPRKTQSVTPRRGDSVSESAAMEITPRQRRECLQAFLLFFPGVPEDVAKLRRLGVRELSAAATVLNEKIKMEEVRQLDFQQSLVQQPS	KZV61123.1	1.9e-36	hypothetical protein PENSPDRAFT_659123 [Peniophora sp. CONT]	No differential expression	Not secreted	NA	NA	NA	NA
Lactarius akahatsu	Lacaka1|MSTRG.10644	5049	325	MSGVDYLPLTTHESDSAIDLHPYPPRGRPYYRTYRWPQRWLRWPRPRSCFKYTAPAIIIIFVLSYLTWEPHIEISYYWRSWIRQEIEPLTPLRGCFKPDQASPLYNVTERLYGPKSTEIHAGLPMRLGLDCYDFAGTIRPLLSSESADRPRTNYHTYWRTDLAPFSERQEYTLKSFFATQNPHSRLIMWSNGDLSTNALLTSYVARYPEAFELRVANIRELSKGTPLENSLLLSSNDEKAWLDGDLIRLLVIWRDGGVWVDMDTLLTRDLSPLLEHEFVTQWDCYGMPPSFPPERKRDNSHLSRQNLPCTQRRVDAFPSALSLPL	KIJ15933.1	5.7e-86	hypothetical protein PAXINDRAFT_76795 [Paxillus involutus ATCC 200175]	No differential expression	Not secreted	NA	NA	PF04488.16	Gly_transf_sug
Lactarius akahatsu	Lacaka1|MSTRG.1412	1491	325	MDTQGTVSEHQSSHRFTTATSSPAGLRGPGPIDQSEMMAFILHEFRDATFFVDLTAEGAPLQADSSNVQQVLNHLRDRHNITHATLLGIHHSTENAPRLPPGPDGFKVEKNSYLPFTHFLNVIVRAAKECLTPWAARHLSNLQFRVYDKEMLDAVDSKKPLKPDILGLRRSLPDNQKISWNDGDVAVIVEVERGQLKLIKQISTYARCFLSVDRRRSFSIAIAFDHEKLQIYFFVFHRSGLSSSPGLSLRSEDGFQSVVKHMVGILSIPDEEAFGLDKTCSGDKSGDVYRINNQDYEIVRPIHTRVCVRGRATAVYSIRGAELSF	GAT57736.1	8.4e-21	predicted protein [Mycena chlorophos]	No differential expression	Not secreted	NA	NA	PF17667.2	Pkinase_fungal
Lactarius akahatsu	Lacaka1|MSTRG.4719	2400	326	MSSDWNYCRSDGVGSSERSPANFSYAYLYLHPRRVRRVTSAHGPCYQLWYAHGLPISDGLLRLADPRDWRSDYRRFYAPKKRAYAMTIWGLFATCAPSLGPLVGGFAAHAEGWRWTIWEILWLSGLTLVLLFFFFPETSASNILYRRAQRLRKVTGNPSIKSASEIAAATMTPRDVAVDILVRPFSLNFQEPIVLVLNVYIGLIYALLYIWFESFLIVFVGIYHWREQMLGLSFLGIFDGVFMVISPFFAYLYFVQEPKYNEKGELKPEERMPIAIVGALIVPICFLWFGWALRASVHWIVPIIGSSLFGTTSFRECRSSLNLNLN	XP_018191983.1	2.7e-83	putative caffeine resistance protein 5 [Xylona heveae TC161]	No differential expression	Not secreted	NA	NA	PF07690.17	MFS_1
Lactarius akahatsu	Lacaka1|MSTRG.5322	1960	327	MSSPIRSTRRLFETPAADRATPRAFPLASAMKGVILTTTGEPLATPMPSARLVELLTDSPRVGAGGSLGFSKIFDFDRLDEEDDDEGEERSAGGTSPSKRKADAIAAQAQAQAPVPAPAPSINRSPSKRKSVGAAAGSLAAALPVPTRSAPAPPSQPARRLRRPSVSSRTRAKASTDTTAPSSSSANPARPPLPPSSSASSSSSSSSSSSSSSSTRTVTSADAASPQPTAPTYDLQDEENLPSPFLRRVEREPPRAGAGATTITRVKRPSGANLLRAAAAANNARPRGVLLAASRVQVHWPWGALDGRQSCAGPERRREGHYCGCDV	KIK19600.1	5.9e-14	hypothetical protein PISMIDRAFT_107269 [Pisolithus microcarpus 441]	No differential expression	Not secreted	NA	NA	NA	NA
Lactarius akahatsu	Lacaka1|MSTRG.8113	1639	327	EFLDDEPNALYAKLRLELDKRTHTPSGDSEESFIEELRSRLNAVKSHYLFDQRDADAHYIPERQKLDKAFLQARLRGDPGPDVSKTSKPSRPDTQPLFHPPKEARGEPTDLLDSNEQEDGGLFEILDDMPSTDVSETGVTVRVRDMPLPKGKFERTSKAFLQAAVNKLDSFAVTTYHPLSSVGRAKRASLSIRWGSEKISEWTMTDVACHDMTQAEQYIATVALHALTFPASVGFASGNSAAGSGPTFFRLLPPAYRELWDELEAARKSSDDATNRAVWAKLKRMVETRSSKEKVCPRLFWISGAAQVHRPSTRVHDNQSEVSRVLL	XP_007298996.1	6.9e-71	P-loop containing nucleoside triphosphate hydrolase protein [Stereum hirsutum FP-91666 SS1]	No differential expression	Not secreted	NA	NA	NA	NA
Lactarius akahatsu	Lacaka1|MSTRG.9492	3033	327	MAAAQLLKIAHNVENKITQIIDDRQRQELRRWVSPPDPSTNHNIARDASASHKQTAEWLFEGSKIKEWKSTGSLLWIHGKRTHLLPSTARHFLIVPSFRSGSRQEHTLVRWSLIGSNSRNSFQPSSSIIQDTISLRKAGLASVAYFYFDFRDSDKQTRRSLLLSLVNQLSAQSDRCCEILFRLYVAHDNGTYKPSDDVLVRCLKEMLTVLVQSPTYLIADALDECPNTSGIPSARARVIELVKELLGLRLPNLRICITSRPEIDIKAALGPLASHSVSLHDEIGQQQDIANYIKSVVYSDSDTMMSRWREDEKTLVIEALSERADGM	OCH90532.1	5.8e-62	hypothetical protein OBBRIDRAFT_592935 [Obba rivulosa]	No differential expression	Not secreted	NA	NA	NA	NA
Lactarius akahatsu	Lacaka1|MSTRG.4752	3002	328	MRTSSLPIRASLPVCSRLISPASHRNLVSYIQVSTSFRTSRRVIAGTQTLLWFLRTCSYSCTLFVPHTVVRDRPTILSFNRFEKKKNVALAIDAFALFKQRLTKVEIRNSLQNLRLIIGGGYDPRVEENMMTLVSLIDCTKAASLSYTIVTPPSSKTSIPPFNVTHKNPDVLFLLNFTTTQRAALLSAPTTLALLYTPANEHFGIVPVEAMSSGLPVLACNSGGPTESIINDPPHARTGWLRVPEPASWAAALLEIAELPQSERSALAGRARARAREHFGMEAMGRKLERALVEAAEMGRVPVPAVLWFGSFVVVALFAYFMATIYAS	XP_007870897.1	1.2e-75	mannosyltransferase [Gloeophyllum trabeum ATCC 11539]	No differential expression	Not secreted	NA	NA	PF00534.21,PF13692.7	Glycos_transf_1,Glyco_trans_1_4
Lactarius akahatsu	Lacaka1|MSTRG.5319	21622	328	MSTPVRQHDELQYLNLIKSILDTGETRPDRTGTGTISLFAPPSLRFSLADSTLPLITTKKTFLRGIIEELLWFVKGQTDSTLLSKKGVKIWDGNGSNEFLEKRGLGHRRAGDLGPVYGFQWRHFGAEYVDADADYSGKGVDQLREVIRKIIEDPTDRRIILSAWNPAGLSFYSFIKRKIIPVIRRVFTVSIDIPLMALPPCHMMCQFYVHLPPSDEPTAPRRLSCLMYQRSADLGLGIPFNIASYALLTHMIARVTDTQPHELIIQLGDAHIYRDHVDALNIQLTRQPRPFPTLRWTRDITDIEDFTYEDFVVEGYDAHPSIPMKMSV	XP_008045527.1	1.6e-139	thymidylate synthase [Trametes versicolor FP-101664 SS1]	No differential expression	Not secreted	NA	NA	PF00303.20	Thymidylat_synt
Lactarius akahatsu	Lacaka1|MSTRG.6605	8512	328	MGAGTKSDPTRIQIADLSATHYDPLARAVRQRLRAVLSRSSPPTPPLGPDRDTDPDPDALSPSSTVSEYSIPVVYSTEVPGDVALLPLADAELAKGSVDELAPLRDFRVRILPVLGPLPALFGLHIATYVLCELAGRPLERPLPVRHRKKLYERMWKDLLHRESRIARKQIKSVRFYLLLSENLSFVLLHSTLPLTQTDIALLYDDFALGRSIVPPQAACVRPALVRWDPRVPLSLENCVVAEFKEAERAVRSVFATPQDGENRDDGIPTTAPPPNDYVDALGEPIDSALLLQGYVPTSPEELWGIEAAKIAQNRIAQARRFREWALQ	KZV72538.1	2.8e-88	hypothetical protein PENSPDRAFT_750832 [Peniophora sp. CONT]	No differential expression	Not secreted	NA	NA	NA	NA
Lactarius akahatsu	Lacaka1|MSTRG.7031	10627	328	MSSPQFAANGTAISPLPVKPDVDDLFATLFAPATPPASPFSLGSPSIFSPPPSARDHVTSISPASSTDSDFGAFVSVPPSDDPLAQPSSSTEPSSTSVVPPPRRLSATITDFFTEAKAATARNQQGFLVELLEHEDDPMYWHKRGASPLGSVVPSGATTPQPPPPAVDIGNSDILGPLAEPVKAVVESSVVGHLLDSLTEATSDNAFSPPPPPPPVEFVNVTTHRSASSSPPLLRSPSLPPSPSRPTPPVLTRTDSMTSTFSSSPQPSRWVSNFLTYRGPSTTSSIVRLASTYGPAGAGRAKARRHHTRLAVCSRSVRPRERRTRLRR	EMD32723.1	6.3e-16	hypothetical protein CERSUDRAFT_108566 [Gelatoporia subvermispora B]	No differential expression	Not secreted	NA	NA	NA	NA
Lactarius akahatsu	Lacaka1|MSTRG.7256	3695	328	MLLDRILELEATVARQPSSPSPHSPSAQLPTQPPTAYPRALQSAHAQTAFQANLHEAFDEIRTEDSSVDPLYTSRHIGPQARKRQLEEIKEREEEEARDARKTPRRGKATTAALNPSKTKDTGVTPPFPPTNNSGGPPASAPGTSPQTLVAPSGKRIRIKPPTAAPPEPAPPLPRSAGQVMHRIPQFINNAGVPPTALSPGSPMSPLGSEAETYAVADGESSTPLRNGNGTLDTPIHMGPGSPTSLGPSAASIPPTTVQRHTKPKRLKAHTVTSKSYSIPMVPRDKSGRPVLPLNVGIMTVNCLGEVCMREHFHTERYIFPVGYSVNR	RDX49961.1	6.5e-53	hypothetical protein OH76DRAFT_1438336 [Polyporus brumalis]	No differential expression	Not secreted	NA	NA	PF05964.15	FYRN
Lactarius akahatsu	Lacaka1|MSTRG.8981	2371	328	MVYHYSNPPPPPSSLRSAAPTVDDLSSQVSHNLRIYETARTETAAQGVEHETERGVRWSAPRPLLPANLRERVKTGLRAVRDAAGPHLRSGEKHTPNDRPEAAFSVLGASAGVHGRAHLCLAQTPPDAPQPTVVWASPQQQGQGVAWGQWPCHSFTHCITVLTERNARAMYELDDEPLPPVYACAFDGVAHLWLVVPPRSRGADAQERPVLSDEQMRAAVEFADEAVAEAEDNAGEAGPMLLACAERNEVDVAALAVLLLARHSRSAGQGRAPCAARRQRGERAETGCAPTYQAVRLLDDDPGVSLVWKGLVGWQDVERLQAVLWTCG	NA	NA	NA	Induced during mycorrhization	Not secreted	NA	NA	NA	NA
Lactarius akahatsu	Lacaka1|MSTRG.2965	4250	329	MARQRATEEQDAAIKAAVDKATTELRSAPSAASEELSKQHAEELRALEERLVAKHREELEKAVEAATAKAQESAPAPAASPTAEEQKAAIDAAVAAALAAKDAEQRTKHQADIEKAVESGRLEGTMKLRLKDTALIRAQNKVKELESQIEEWKKAGVVPVESTPSASAPPATSPTTTAPSSVPSPTTSAPARGGAPLTRKTSVLGATASSTSAAAAGAGQPLRGRGRGAPRGGNIGIRGAAAPSTGRGAGVPASSTAGGAGGVAIMGAAAKRTREEGEVATEDSLAKRLKPAVAAAAASTSPAEGSNANASGAAGGKPITLQRNRVQPP	KDQ62646.1	5.2e-18	hypothetical protein JAAARDRAFT_54566 [Jaapia argillacea MUCL 33604]	No differential expression	Not secreted	NA	NA	NA	NA
Lactarius akahatsu	Lacaka1|MSTRG.9702	19139	330	MPHPHTLELVKSWLKYHGVPSSASLTHGGNWLTLTSVSVSKANDLLGASYQLYRHTETKEIIIRTVGYSLPAALHGHVQTVAPTTFFASPRMSWQTPRMRSGGAATEQVEATPGDLVTALLGRADYVTPPFLRWLYNSATYVPAATDRNVLAISGFVQEYPNPVDLTTFMNHFHGTGTGATYTVVQVNSGGYDPNNPGTEANLNVQYASGIAYPTPIVYYSIGYGPEGKNDPYLSWLDYMLNLDEIDIPQTISSSYANYETELPLDHARAVCDLFMQLGARGVSVLIASGDEGVGEGDCMTDGNVRFRPTFPANCTWDVFFCLQAIHERM	XP_009548822.1	3.4e-78	serine protease S53 [Heterobasidion irregulare TC 32-1]	No differential expression	Not secreted	NA	NA	PF09286.12	Pro-kuma_activ
Lactarius akahatsu	Lacaka1|MSTRG.10578	12230	331	MGRTEPLEGADSRTPSSDDVACIMYTSGTTGAPKGVVLKHSHLIASIGSVVTLVGHHLNPDDCYLAFLPLAHILEYVVELSFLFVGMCSGFARVKTLTDQSVRNCQGDIKAFRPTIMVGVPAVWELIRKGIIAQVNKSGTIRKSMFNGAMAVKKANVPGLKSVVDSVVFSKIREGTGGRLRVALSGGAALSRETQEFLTTALVTVVQGAPASWLGSAMSWELTDDAHAGYGMTETCGMCSILPPDMMRYSCVGLPSPSIEIKFLDVPDAGYLATNNPPQGEILLRGPSVTGGYYKRDDLNNSEDTFTKDGWLRTGDVGQWNKDGTLTIIDR	XP_009548592.1	4e-135	expressed putative fatty acid biosynthesis enzyme [Heterobasidion irregulare TC 32-1]	No differential expression	Not secreted	NA	NA	PF00501.29	AMP-binding
Lactarius akahatsu	Lacaka1|MSTRG.3252	1897	331	GIYYIQNKNHPTPLHLASLYGRFDVARVLLDHGAAANSKDEFGRTPLHLLAEGKYNFEQDRIRIAQLLLERGVDINAQDDDDATPLHSASYNGKVAIARVLLDCGAAANSKDTWGRTPLHSVVEGRYLYSKDDGINIARLLLERGADVDALNEDNSTPLHLASSFGKVDIARALLDGGATADSKDNQGRTPLHVVVKCYSNDNDVLVAQLLLERGADVNVPDDDDQTPLHLAVASSFGSVKMVLVLLNAGANANAKDAQDQTPLHLVSQLERKSPSMVHVARLLLEHGADLNARDEIDATPLDLASYHRKTDIALASLLLQYGSKVDEPRQ	NA	NA	NA	No differential expression	Not secreted	NA	NA	PF00023.31,PF13637.7,PF13857.7,PF12796.8,PF13606.7	Ank,Ank_4,Ank_5,Ank_2,Ank_3
Lactarius akahatsu	Lacaka1|MSTRG.8998	7760	331	METVTVPARSSSPHLNPDKPPKLVLLDDPDADFILRSCDLQEFRVLKIYLIKNSPVLNELIESSASINFPDSSTSPHAGALPYIPLSENGTILSSLLSFILPMLSVLPPTTEQIIELLSAAQKYEMIPTLAHIRETIALLDPPFILPETAFHIYSLAQRYELDQEVVRAARMALTSPITIEVLEDKLDIMHGAHLHLLWKYYQRVRINLRSDLTAFRTNGAHSTLAGLTCSAVSSSGIPSWLDDYIVSIGEDPSLFDLNELYMCLARHIVATSQSTVCGTCGTVPAKTIRAFWKAFTAVVNDSMTKVSATQVLDNTGKRLEYWCLYRTKRF	KDQ61500.1	3.6e-11	hypothetical protein JAAARDRAFT_704813 [Jaapia argillacea MUCL 33604]	No differential expression	Not secreted	NA	NA	NA	NA
Lactarius akahatsu	Lacaka1|MSTRG.3114	5139	332	MATRLLYSAHRGSTLRSTSSSMTPTPSTSPNRQRRRPPRHDAPASGEPSSATHHARPSRHPQAQGQRSTPRPTHFLALPIGHHAHLRSTVQALTASWLAHDPPIDGLDPSIVVQPRRLHLTLGVMALAPSPPSRAAVDPAAEPETERDLAAAARLLADLAPRIRAILARAPLRVPLGRLTVMQPDPTRAHVLYAEPDISSPDGRRLRTVCGTCFGPVFSSPHLPHFQLLWRAGWVVLYCPRTHSECIYGGGLSRCRSPPTQGTLRRTLHTPLRSCSITWFHPCAVVSYTARSSIPTTAARCLASGALPGAFPLTSRRFRPLRVKILILVRGR	KZV67917.1	4e-26	hypothetical protein PENSPDRAFT_653651 [Peniophora sp. CONT]	No differential expression	Not secreted	NA	NA	PF10469.10	AKAP7_NLS
Lactarius akahatsu	Lacaka1|MSTRG.3122	7485	334	MHSSSELRHHAATVLASFSQTLITHRTLVDEKTIETICYHTHSFLTPETTRHPTSSRKFPPLLDSAVSSKSFGNVGENAPWAMTLIASFSVLLGPSLFLHRGPLKLVMNIAQKALRHHPGRELNPHVWRTFIWSMTQLYLQQGPTAEAGDDIVQRCVLVLKQAIHGGLGTALVWSLLGMTSKGSQNSGTNTARWVIPSTVEIVRDMLSSKSQEIRDEACQLLVYLTCEARTSGGAAQEAEWTAEPLLSSFLFDGSLLRADKCQIEEIVRSTRVFSPRCLSPEEILSHWEPLSSCLVSVIQNCDSDLTVRLYMRLLGLFLTYWRRLSFFLRGGPF	KDQ62521.1	3.4e-17	hypothetical protein JAAARDRAFT_66222 [Jaapia argillacea MUCL 33604]	No differential expression	Not secreted	NA	NA	NA	NA
Lactarius akahatsu	Lacaka1|MSTRG.3615	12942	334	MPAERTRSLKKEKEDTDGERAVLPLIAASQANLSAGVQLTWTDTIESATASHQIAFAPAVTPGTFTEESFVDSTETTSSLFPSTLDGAAPRKPGHGKKKAEDHIPRPPNAFILFRSSFIKSRHVSTEVETNHSTLSKIIGLTWQNMPHEERQFWHSKAKLAQAEHKRKFPDYAFRPSHVRSKGGAAAEKRKVREVGPKDMKRCAKIAQLLVEGKKGADLQAAVEEFDKNHVPVIVTRFDTPHHRALLPSFRVRARARHRPVRACVPASRSHTVLPPSQSDQFPARHVSPVERCGGSTRMFPILVLVLPPLLFCLRLLALCEHRREYRYLVGCLE	XP_009549755.1	5.2e-82	hypothetical protein HETIRDRAFT_478862 [Heterobasidion irregulare TC 32-1]	No differential expression	Not secreted	NA	NA	PF00505.20	HMG_box
Lactarius akahatsu	Lacaka1|MSTRG.10030	18115	336	GTRTGVGDAAAPPLSSWNPTFHAQVIVRTSNDTPRSSSSLVPRCRCSSSNSGPSPTVILLNSPSAKPSVASGYYGDYAAPVQPSVGPDVIKLNAPAGSLPIIKLNRRQLSPTSTSSFSFGGIVPSSTPALFSPLLSTTTPLSGSFGSTTTPPLSATTNPAVQGGPPTFANTGADGIETVFILSTVTVTATGPLCSSPPAVTSSGPAPGFPPPFSVTTSSAVSSNVPPSSPPSLVGVSAQAPVPVIPSIVTTSSLSTIDLSTPATPTPTSTNFSFSSGSTSNPAPTPFPVNAAAPANCDLGCLLTATVLKRTIGLLTIVMTALLIMFTYCRKCISFY	NA	NA	NA	No differential expression	Not secreted	NA	NA	NA	NA
Lactarius akahatsu	Lacaka1|MSTRG.10678	8074	336	MSGPHHGLTFLHRFRWVFCQLEILRRCFPTNVRRVIEELPESLDETYERILKGITKASRQYAYRLLQFLAVAARPLRVEELAEVVAFDFDAGEGEIPKLNTGWRWEDQEEAVLSACSSLVSVVIDDGYRVVHFSHFSVKEFLTSERLANSTGEAFQFHISLEPAHAILAQACLSILLHLDDHTDGDKIKGIPLVLYAAEFWVKHAQFKGVESRVKDVMDWFCDMDKPHFSAWIRMRNIRDLCPPSDTPKLTTAPLPAAPLYFAARHGFCGLAERTIVQASTACERSGRSSRYSIALVCALGTHRQFPRCCLRTVPTSILHARTPGLHYTSHRSTDF	OCH87556.1	1.2e-57	hypothetical protein OBBRIDRAFT_735932, partial [Obba rivulosa]	No differential expression	Not secreted	NA	NA	NA	NA
Lactarius akahatsu	Lacaka1|MSTRG.2966	2791	336	FKLDSLTQQLQLAKDEVDRTSKELAKKSEDFANYRHEKHASHSQLQSAHDALKEKYASAEGTLKALRDAHNVQSRQLTQSLTRQQDLSARIAEQDATYATEVAGLRRLIEMVEAREAQSKAIVENVEQEWEAVNERADRRESALREQVDRERLRTEAAEARIEELERVLEKVNHGEFPVPAPGTSAPSTPARGSTDVLMQGIMSLSPTVAIASRAQRTGKTFTEVYADHVRLQDEYAKKCAEYDRMDRTLAQVLAQIEERVCFYFVGESKLSPHRLRHQSLPNNVLSTNDCSPRRRNSRLSLQMHSQSVILAPPVPPKSHSASRRLFARTSRFKSS	KIP09685.1	8.9e-74	hypothetical protein PHLGIDRAFT_102420 [Phlebiopsis gigantea 11061_1 CR5-6]	No differential expression	Not secreted	NA	NA	NA	NA
Lactarius akahatsu	Lacaka1|MSTRG.4897	3357	336	MAGFVNIRRDVDDKFYRYRYVQSHSAHFLPRSFLCSMPVLLTKIEGKGNGIKTVVPNMSDVARALSRPPTYPTKFFGSELGAQTTVDEKNDRYIVNGAHDATRLRELLDAFIDKFVLCGSCKNPETDLIITKNEMIVRDCKACGERTSVDMRHRLSTYILKNPPKKKGKKNKGGHAEAPSPSSEVNGVAASGENGDAEAEAGSEDEMTKRIKSEALELKAESQLADEGWSADTSPEAVKARIGAVAAGMGNLALTGGGEDESDEDADSPYTQLGNWVVDNSGASAVDVFKKVQELGIEKKHKAVRVLVQTLFTGEIIAEIPTYIAIFQKVYLHLFR	XP_009541680.1	1e-117	hypothetical protein HETIRDRAFT_448237 [Heterobasidion irregulare TC 32-1]	No differential expression	Not secreted	NA	NA	PF01873.18	eIF-5_eIF-2B
Lactarius akahatsu	Lacaka1|MSTRG.7910	6133	336	MAQTPRNAAAWAIPRRSQTLLLTRPRATSPHHLLTSPLLLTALSPLDTPARLSVLCQAHPSPAVLPPPPSSTPTISPLTPDFEQDVNMSETSSDPDPSSYNGPYADRTASPMTISLDGASYNGVRAHGQVRGVVVSAPTTSCIESIPCPICGRAVSDAHTVGKIDTIFKPDISDNSPGIIPPGPLTAAAFESGMSAVEELRLLKAQVQDVARVCNAVARGDLSQKITVPVQGVVMVQLKDVINGMVDKLGQFAREVTRVSQEVGTEGCVPLVPTTTPDPPDLFFVSPCAPVNLVARLSCSTSKARGANSLASSTSSPPTSRIKYGHCPRHDGRRSR	XP_012183574.1	1.1e-50	predicted protein [Fibroporia radiculosa]	No differential expression	Not secreted	NA	NA	NA	NA
Lactarius akahatsu	Lacaka1|MSTRG.8584	14460	336	MGVYTGPGKIDIAMDLPHPVFWMEASASMPVVLKDRVVEAFQKLHERGIVHGDVALRHILIGADARVTLIDFQASRADDPNEDLGLAATYPGEKELEMRRVKFLLNMDNARQKEFRKSKAAHKRTARNSARAQRRRELLRHGITMGLPVDEPAPLADTHEPPVPLDELERYWMEDANDDPRRFIVPGSSESEVARAISSFLQQIRDMEESDGDWSVAGNSPSSPRSALASPSCRLEDSVPELPPSIKVRDFAYESTYRHPICGPQAVHVSPGDPSCFLGSAEAGGPGNKGTSSTPTSSCMKRRRESDEEERTTFVERLPTGKRTRLSSEESSTGVA	KZV75592.1	4.3e-36	hypothetical protein PENSPDRAFT_647126 [Peniophora sp. CONT]	No differential expression	Not secreted	NA	NA	PF01636.24	APH
Lactarius akahatsu	Lacaka1|MSTRG.11322	5660	337	MRSPHLPCSSRTPSISSQPSSSPYNSQPTNSSFGPSQILSPRASFHLIWALLLLSSLPFPYALSLFFFFVTPPSDEAAANLASLKFSQSNRGPDPREPSRVITTTTTTTFSMTRDMAKAMSQHFMDARLIENAADPSSNLFKDRGVYVLTPKGLHVLERFISRNGINGDHLAHVFATQPICMKLLHLERRSVDDEIIVSQSVITALFRRFSAREPNYPSPSNQNLDPTAAYHERAKGIQLMDVSDRQSSSSGRAPTHRYCFAALAALEWLCDFTSVVGREEAAEMAAQFVRFGLITLVSDKRKNNDSAIIFTVRGSAPGGNSPVSVCYHPVSSRTDF	XP_007303008.1	2e-118	regulator of G protein signaling [Stereum hirsutum FP-91666 SS1]	No differential expression	Not secreted	NA	NA	PF00610.22	DEP
Lactarius akahatsu	Lacaka1|MSTRG.3137	4996	337	EEVAKLVEPHPDTLELVHSWLAHHGVHSSSISTSHGGGWLTVTDVPVYRANELLSASYQLYRLAGTNDTAILRTVGYALPKVLHAHVKTVAPTTFFASARTLQLTPHGHSSRAAGAPEKAASRGPVSVLSSRDEDTTPEELRWLYKTYTYKPTALTKNAIGIVGLNNEFPSPTDLDMFMSVFRPDTDPDEVTFTVELVNGGQYDPSWPGTEASLNMQYAQAIANPTPHIFYSIGGGLRWSLANNEPIAGDEYLMWMAHLVPKEKIPQTMSVSYGVNEKDVPAEYAWSVCGMFMQLGARGVSILFSSGDNGVGVGNCQDTSGRVRFIPKFPATCMFYL	XP_009548822.1	1.2e-73	serine protease S53 [Heterobasidion irregulare TC 32-1]	No differential expression	Not secreted	NA	NA	PF09286.12	Pro-kuma_activ
Lactarius akahatsu	Lacaka1|MSTRG.5841	15631	337	MRTRKAAKRSMQHIEDVIDITDDELAIVPARKPKERPKPRPVKRAVPSRDCPPLPSDPVTLPVPSSSMSLPPSDPFPESTVINFTPPPPGLDEVAASTSSPRESSARKRKRQRPGRFQSPMDDPTDSRPLPTALDRASSPLSDPPPPARGSGTTPDISHEVKSNEKDTDDEYGAEQSTKRHRNTKGTEDSTNASPGRSEIDKSKKKSIVEVVILSPKKKNKRTKANADDGRSRKGFKSRNKRPASSDEDDELLLAPQSNSSAAAKSHKGKKRAITLRSEDGPSTEVGSSSKGMAMGEEEHEHQRAAPMPHIDGDDKTMSRSVELTTPAPLKVDLTAL	NA	NA	NA	No differential expression	Not secreted	NA	NA	NA	NA
Lactarius akahatsu	Lacaka1|MSTRG.10500	9764	338	MQAEISDLRSQNDFQTSEQQRLESELKEVEERCRRQERTIQELRSSASNTHSYLTGIPQRHSSSPTSRSFNPSSSKTSTSAVNRYTATSHSTSSRLAGPHDTRGSPPAPLFGSDDKLPYAKHLQGKFDSEDRAPPVERTSGRYAATAHSGSRSAGSHDTSPPPYFDRDDDGLSYARRLQSEFDSEDRALSAERTTLSRYPTSHSTNSRSAGPRDTRTRGSQLPPHFESDDGLSYAQRLQNEFDSEDRALSAERIKLSKNVQRVFQCGICMEDMPEDSVARPDPCGHAFCRECMHGYVSNRLEEHRFPILCPTCTAGKGKGKGVTGGTRIFSSPSSSMF	KIM92372.1	3.2e-23	hypothetical protein PILCRDRAFT_120903 [Piloderma croceum F 1598]	No differential expression	Not secreted	NA	NA	PF13639.7,PF13445.7,PF00097.26	zf-RING_2,zf-RING_UBOX,zf-C3HC4
Lactarius akahatsu	Lacaka1|MSTRG.2138	3871	338	MQAEISDLRSQNDFQTSEQQRLESELKEVEELCRRQERTIQELRSSASNTHSYLTGIPQHHSSSPTSRSFNPSSSKTSTSAVNRYTATSHSTSSRLAGPHDTRGSPPAPLFGSDDKLPYAKHLQGKFDSEDRAPPVERTSGRYAATAHSGSRSAGSHDTSPPPYFDRDDDGLSYARRLQSEFDSEDRALSAERTTLSRYPTSHSTNSRSAGPRDTRTRGSQLPPHFESDDGLSYAQRLQNEFDSEDRALSAERIKLSKNVQRVFQCGICMEDMPEDSVARPDPCGHAFCRECMHGYVSNRLEEHRFPILCPTCTAGKGKGKGVTGGTRIFSSPSSSMF	KIM92372.1	3.2e-23	hypothetical protein PILCRDRAFT_120903 [Piloderma croceum F 1598]	No differential expression	Not secreted	NA	NA	PF13639.7,PF13445.7,PF00097.26	zf-RING_2,zf-RING_UBOX,zf-C3HC4
Lactarius akahatsu	Lacaka1|MSTRG.6940	2049	338	EHPGDVDVLVLPSGFLGGSAPRLQQLILRRVPFPTLPTLLLSARDLVYLCYDLIPPTGYISPEAMVAGLAVLTRLETLSIGFYPLVYLPEERRRCPEPSMRAVLPALTDFEFRGFGKYSEDFVAQIDAPRFHDVTMILHRLDCLRVHQLFLFIDRTENFRQSRVRVSFSDGHIDIHVVAGHPSSRVLRPHFSFSTPLEWSNTQVAYLTLVLSRMFAVYSHVEYQYLAICDYKNRPGSSWHDYIDRTGWLAFFRQLTTVETLYIYGGLAAQVVRALKDVPGEMVTEVLPSLHSLWVDIGYLGPVNLKPAEQFIALRRLYGRPVTIRDRHYYGYESVERL	NA	NA	NA	No differential expression	Not secreted	NA	NA	NA	NA
Lactarius akahatsu	Lacaka1|MSTRG.8119	11440	338	MYRVYQCWSSQLLWAAHVTQFFPFQDEVRKLATLLPRLQMFLARRQNNVAAINKLPIEILAHIFKLASMSEADAHPAQCIIVLSLVCSHWRQTALGFPALWTTIHLREGAIHDFQLATLCLERSKDASLSIVISTLFRGEQISNFFLPYSSRIESVSISIPFRCSSYDVPRFLLSTCGFLAPRLKFLRLCTAMWGSYHSPVLPPIFGGDISRVTHLQVESFSPYPGHTFGCLTHLALSSQSQYERRPSMTEFLDFLEANPHLEELLLDDAGPSVNTSDRRPPIYLPHLRLLCFVSTLTERGIGVARSVSFPTPPPLLHPGSPRHGPSHPDELLPSPFP	XP_007307631.1	4.4e-73	hypothetical protein STEHIDRAFT_170794, partial [Stereum hirsutum FP-91666 SS1]	No differential expression	Not secreted	NA	NA	PF12937.8	F-box-like
Lactarius akahatsu	Lacaka1|MSTRG.9353	6488	338	MPSSPRLSIFNTASNSWQGGSSMDFPEGQRRQRRLVASWLPSNMADETSLVVDDLSVRVKDFALDPSQDLIVFLEHRPAASASSSAPNSGAGVCIHLRKLSAGAVAPHPAAKVPVLCSCAPGPVHGCMIQVVEVVVGVYFWMPLHGVLIWNWMTGEELIVRLFIPPYVLLTSYPGDQFIQGDEVPECIWEFSLLSPRAYMITALKDGGEIRIYSFCVSLVIQAANPRRHAAPSHHPHPTRALFKLTTTTGPFLARPPTGSPFSFARTARVHVFTLHYDPGAHRGRWRPTCFVMHNRTLMRYVEAYRDDGASAMDVPWEEWGPTETRFFVLAMGFQWLR	XP_007320548.1	1.2e-41	hypothetical protein SERLADRAFT_349939 [Serpula lacrymans var. lacrymans S7.9]	No differential expression	Not secreted	NA	NA	NA	NA
Lactarius akahatsu	Lacaka1|MSTRG.5323	6820	339	MGSSLTIPPHPTSSIPFTSSPSLVPPNPSSFLFPLHAVSQNIIMSGAVRNKGGAGAQHPPRPPNAWILYRSDKLQQLPPPALGQPKPTQAEVSKIISAQWKAEPDEVRAIYDERAQIAKVEHARLYPNYRFTPMKRADKDRMREEKRQAKEQERAGRRTRGRASPYALPPTASSSTPPIPLIAQTVPPNSKPASPLVSSASSPLPGTPSSQSSADIALRHGSTHAPSHDSFADPRRPNSSDSQSASSRASSYSRADIPVATPVARRPRAPAALHAPDAHPQGLAAPAIRIIINGLPQPSPGIPAHRLAAVRPSVKRSTTTTRGTWRSSSINVFPYRLCF	XP_009547626.1	1.3e-27	hypothetical protein HETIRDRAFT_476671, partial [Heterobasidion irregulare TC 32-1]	No differential expression	Not secreted	NA	NA	PF00505.20,PF09011.11	HMG_box,HMG_box_2
Lactarius akahatsu	Lacaka1|MSTRG.7110	7641	339	MSSSLAPSQSCPAAPRSVQLPRELWCDITARILGDYLYDLIIGTDTRDDGDLTDENADQRPPTPTHPGDTCRYSVPDRPEWDALATLLHTSRLVRSCTSDHLSFLSHRPDTPPPKAHDDYRPLVAHLRALRDDGIDTLVLEEWDYAPGAQFFGLPRSLVGPCACTEPEEDQGLPPVLVLARLRHTLAASDAFAREGWDWFPYNAPEVYDVGCTALLVETYRAVPAYVRSALLWRVVERVAALQVARITRACFFFFFFFRFFFGVSKMKLFIWFCFLVLGLSGAIEKTRNRIEMTQLRLGAKHPGDITHPAVRRSLITHDGCLYAVFFRPGRRAKTFWFL	NA	NA	NA	No differential expression	Not secreted	NA	NA	NA	NA
Lactarius akahatsu	Lacaka1|MSTRG.9362	2697	339	MPCYDKKLEASRSDFYNDHYATRDVDCVITTGELLLLAQEHGVDLSLPVPGEDDAPIPISSTTPTLPDLLTPPGSSSGSYLHSLILAVARASQRPLTLESKAVRGNADYVEHTLRDASSGDTVFRGATCYGFRNLQNVVRRVGRAAGVQVGRGAAGRLAGGLRSSATRGAAAAAYDYVEVMACPGGCVGGGGQLRAPERHSKTSADADGMDSGTAAEAPLWNTRAWTREVDRAYWGGPARPGPGSGDLSNKGNNKASCSPTLELSSGTESDDRVEALVARVFLDLSAPTGPQQEQEVGTGAGSGPGPESRALDEARRRGLFRTEYRAVESEVVGLGVKW	XP_007317465.1	2.3e-77	hypothetical protein SERLADRAFT_465344 [Serpula lacrymans var. lacrymans S7.9]	No differential expression	Not secreted	NA	NA	PF02906.15	Fe_hyd_lg_C
Lactarius akahatsu	Lacaka1|MSTRG.6468	3461	340	MTAVPRSVNSRHANSHADSRASSLGPSDSASQQARTDVMKDKAIEDLLERVEPPPLRPDFLPTTVLWDFDDCYTDKTLGDILTDNNKCRPRLSLAIRRPNGSKISTFELSNMRRSAELIVQRLIKFINSDPRSAGAGLKTRPKTFIKKYFMAEHYQAVLDLEAEQKLLRLCSAHWKADAFITKVFLERNKEKVKATTNSTPATSPQFSQSPEPPTAFNPQIREVAPMKATKRALELSPGPKSPSASHAQKRNKDNTVLSGQKTVGPGLSNRECSTRQRPNPLTSGTGAQRTNILPHARSLPHSLVAPRRSVRNLRQQVSILFTSIHQVRLSHAYSYCILI	KZP23692.1	2.8e-11	hypothetical protein FIBSPDRAFT_951906 [Fibularhizoctonia sp. CBS 109695]	No differential expression	Not secreted	NA	NA	NA	NA
Lactarius akahatsu	Lacaka1|MSTRG.7264	8855	341	MSLVVSAPLSNQIQVPFIDTRRVYEIRERPSRMYSWTALITAQILGELPLNIIGSSAYFLIWYWLVGFPSSRAGYSYLMFGIMYPMYYTTFSQWVAAMSPNPEIAAQLFSFFFSFVVTLSVVFCVKPGLALTLMIATAYCSHTSTLAGGSGCIAPHLTPISSKDCWAKVDLCYVINSYCILIALAALGHSEITCSSVEYVTVTPPSGQTCQQYLSEFISTTGGYLTNPSATDNCQFCSYRTTDEFLQSNSNIFWSHHWRNFGFMWIYIGFNVRLHSHYHARQQAHIQLVGLCYLCYDLHLPCSRPRQLFLSQAFIEFIIVCLTCSSCICNYFFNMHQRRTM	XP_009550463.1	7.6e-73	ABC transporter [Heterobasidion irregulare TC 32-1]	No differential expression	Not secreted	NA	NA	PF01061.25	ABC2_membrane
Lactarius akahatsu	Lacaka1|MSTRG.10395	9415	342	MTVKTKTFVSVTIEHLPEVGKSDDILQVGSDLWNAVAPASASNEPITVSVGLLQTRTDNGRGDPSISLSVTCWAVPGKDVQVSSISVSRTSFTPRSQTATLGIPSDLAKQYPHTLGPGSTSRRSGKTHMLSVVQVIPLQEVFVQALSSPAYSSAKSDVSAFEDWLCRGQKILRQNSVLSMDSQDSPDGTPVAYKLIMTEPVLQGYAQKSQTLFTLLPPPEDPPAINGHRTQSSSVPDDAHIEFDDEDLEIGESFLAGSLVPQSTLYPQQENGSPTISVPLFAHELTARPLLTPNYSGLDDHTMYVRTVDLPKIGVLDGDWVSASPSYLEFLNHRHHLTNARP	KZV61880.1	1.8e-34	AAA-domain-containing protein [Peniophora sp. CONT]	No differential expression	Not secreted	NA	NA	NA	NA
Lactarius akahatsu	Lacaka1|MSTRG.4264	6861	342	MQVPFPALTHLGLRWEDEAPTLPSGFLGGSAPCLQHLDLEGVFFPSLPTLLSSASDLVKLSLDDITQDAYISPETMAASLAALSRLKHLFIGLRLGTSRPDRTRLPPATRTLVPSLDFFEFHGTSEYLDDLVARLDCPKLDQFCIEYSDQLLDFQVAQLFKFIDHSEDPKLTPIRQANVFFSHESVSFDMYPCPKSRPNSHPNWNRVSASIYCRGIERQLSHIAQVFSQPSTMLSRLVHFKLSYFRTKAGDDEWLYLLRQFSAARTLHVGRKFAGPLALVLESLTGEMVAKVLPILNLIYLEGQPVSALEKFLAARQLSGHPLTIVDTKAEFYERVKSYVSE	NA	NA	NA	No differential expression	Not secreted	NA	NA	NA	NA
Lactarius akahatsu	Lacaka1|MSTRG.4729	4306	342	MQVPFPALTHLGLRWEDEAPKLPSGFLGGSAPCLQHLDLEGVFFPSLPTLLSSASDLVKLSLDDITQDAYISPETMAASLAALSRLKHLFIGLRLGTSRPDRTRLPPATRTLVPSLDFFEFHGTSEYLDDLVARLDCPKLDQFCIEYSDQLLDFQVAQLFKFIDHSEDPKLTPIRQANVFFSHESVSFDMYPCPKSRPNSHPNWNRVSASIYCRGIERQLSHIAQVFSQPSTMLSRLVHFKLSYFRTKAGDDEWLYLLRQFSAARTLHVGRKFAGPLALVLESLTGEMVAEVLPILNLIYLEGQPVSALEKFLAARQLSGHPLTIVDTKAEFYERVKSYVSE	NA	NA	NA	No differential expression	Not secreted	NA	NA	NA	NA
Lactarius akahatsu	Lacaka1|MSTRG.6262	21381	342	MSTSSINESSPTSYGVSPAMEGPYRAFHRRDLSTSSITTPVYSQQDSHDEGEGTPLRTLDNVRDQVAAHVAVRMMRKLKTADNTHYGVALTLSKKDDGGFLRLVASHLASSPTGMLKDKAYLIAVATTGAGDTSLLICGSDATKVQRAALLTMSKFIGHVTPQPQQDGGAVWLARVRGLGWSAYDETALWDVLHKCAQELVDPSRPPPGSRGIDETLAIARTRLQRLLPRQALAELRDTDIKVPVLLVDIRPAAARAAQGHIPGAMVIERNVLEWRFDPRSVEGRLDIATRYDLRVIVFCHEGYTSSLAAAALQDIGLLNATDIVGGIEAWKAEGLPVEMEP	KZV71494.1	4.2e-103	hypothetical protein PENSPDRAFT_630192 [Peniophora sp. CONT]	No differential expression	Not secreted	NA	NA	PF00581.21	Rhodanese
Lactarius akahatsu	Lacaka1|MSTRG.4019	2410	343	MQDTFPWKWHRLAHICRTWRDIIFASSRRLNLELLCTHGTPVRKNLGHLPALPIVIHFAHPYGVKDSDEDNLIAALEHPERVCNVELYVSCSLLGKLATAMQGPFPALTYLWLELDRGLFPYIPLSRPREEPPVLPDAFLGACTPRLQKIHLVAIPFPPAPTLLLSARDLVEVDLRDIPDTGYISPEAMATGLAALSKRKYLTLGPRCRPPYPDQIRQPPVTPTALPVLASFKFSGIFDYSERFLAQINVPQLNWLEIGYLIKDEGFNFSIPQLCKFIDRSENLKPSQFRRVDLDFQSSTIVIGLGGGPSSLKLSIQKDGIGQGAQPVLCYSLQRGPPLLHQF	NA	NA	NA	No differential expression	Not secreted	NA	NA	NA	NA
Lactarius akahatsu	Lacaka1|MSTRG.4846	4012	343	MTLDHVPPRAPTPPEGNDRSVISETVEEPPSDPRPHPFQTHVNKLGIFRRYTHTPTWLPKHDERFDLVCDSPSLDAPPPPPPPPDTTGAIHEVSHDPIGPFPNFSVAMYMGAYFSGMDTKSEEHVSFLAKTMQDDRFDSKHLAGFSAHVENVRLDKYLTDGEHPFQIRDGWQESTVHIRLPVEGKQFNSEDDAPTLPIHGLFHRRITDIIRSVCVSKAAESFHLTPYTMHWRPDPLDPDKHERLYAETYTSDAMIQTQTSVDNIPREEGDTRERIALGLMLASDSAQLTSFGSASVWPVYLMFANQSKQERVKPSCHAVHHLAYVPSVSLTVVICPMSFTNNH	EGN94895.1	7e-50	hypothetical protein SERLA73DRAFT_155586 [Serpula lacrymans var. lacrymans S7.3]	No differential expression	Not secreted	NA	NA	PF18759.2	Plavaka
Lactarius akahatsu	Lacaka1|MSTRG.6058	10689	343	MFSRVLLFLCRYGAYLTKEQVADLVAPHPETLELVNSWFEHHGISSSSISTTHGGNTLKLKGVSVTQVNTLIGASYQLYRHVESGETIVRTVRYSLPTALHRHVLTVAPTTSFVSPPTQWQTPRIRSSRKTAELVKLASGEPATMLSSRAQIDYVTPPFLRWLYDTVAYIPMAMGENVLGVVGFLGDYPSPTDLSAFMHKYLEADDATFRVDEIRDGGYDATHPHREANTDIQYAEAMAYPTPHVFYSTGRGPTGTADYYLNWLEYILDEMNIPQTISWSYGAEERDLPREYTSFVCNCFATLGTYGVSVLVSSGDDGIGRGNCVNANGVVRFIPRFPATCTY	XP_009548822.1	7.4e-76	serine protease S53 [Heterobasidion irregulare TC 32-1]	Induced during mycorrhization	Not secreted	NA	NA	PF09286.12	Pro-kuma_activ
Lactarius akahatsu	Lacaka1|MSTRG.7248	3237	344	MPRRVTPPLELPSSPPSRLPHKPPLITDDLLHFDFPGSDIILRSYDSHDFRVPQLYLVNGSPVLRELIRSVLNTPDVPNGEGQTKEQPPLPVVKLPENGVILYSLLTFIFPVAPILPSTTERIMELLSVAQKYQMDSVLTYIRGVISRRDPPFILPKTALHIYFLAQKYELHQEALLAARGTLRLLMTIDDLEDKIGFMPGAYLRELWKYHERVRKDLASSLPEFRELGSNVESCGNPPSSIPNVMPQWLDDYIESLPQAPHLFDLVEFENARARHIQPHGCNICPSISSEAIRTFWEALTAAVHGAVEKVRKARVTGFSCRDDEYEHPTGRFGSDSREGRANP	XP_007302583.1	1.1e-10	hypothetical protein STEHIDRAFT_109706 [Stereum hirsutum FP-91666 SS1]	No differential expression	Not secreted	NA	NA	NA	NA
Lactarius akahatsu	Lacaka1|MSTRG.10327	2067	345	MRPVWQHIKRTLKQLLVFLRSQRRQFVDPHVAKIWERIKELSRGDDEVSPGDSRSTAVPYRAPVETPAGSLAVQTHTDSLDGHTSSSAEPPADYATPISIHASVVSTFIPGPSPDAGFAEDVASEVFSPVTTSHVESIPVVAHSSSLEASTPLSATIPSPSPSAPPSVTDDVDLDAFYADIGLNNEEPEEVPESEPVPTEDPPLSEEQLEELRLKKLAETAEKRRDITGRHSKWEEKVEKAIKEQKKSLRRILVAMRKAAVQEFRTNSDVKPAIDQLVENADKLLKGAEAYLANLMKESRPLDEKVTLWTKVLEKVDAKFMSYLRHIEDVVDRWYTSHLEREREQ	XP_009549504.1	4.1e-42	hypothetical protein HETIRDRAFT_420408 [Heterobasidion irregulare TC 32-1]	No differential expression	Not secreted	NA	NA	NA	NA
Lactarius akahatsu	Lacaka1|MSTRG.6406	7845	345	MTKKTMGRHPVRLVTPYLGSPPYALPSFWSFHQHKRVTVSPRQRRRPIHHPERGALDCSCPNAPDIYADSKDDDELEREENEVLPTDNMLVTAIVEQNVPQLHFFVYDEPTEYLGPHHDLLLSSMPLCLEWLDYPVSSATKEESMDTEDGPGSRFGNYVAIGTLEPEIEIYSIDLLDSVYPDTVLGNPKETAAHVPEAAGTGKKKRKKAKHRSASEAHHVDAILSLSWNRTARQMLASGSADRTVKLWDLSRDPKEGALRSFGKLHRDKVQAVQWNPTDPAVLLSGSYDRTVRVFDSRAPDASVGAVVGADVEAIRWDPWDNHGFYVRRFSFPSCAMGDLIGTYL	KZP22770.1	3.2e-79	transducin family protein/WD-40 repeat family protein [Fibularhizoctonia sp. CBS 109695]	No differential expression	Not secreted	NA	NA	PF00400.33	WD40
Lactarius akahatsu	Lacaka1|MSTRG.9628	22232	345	MTKKTMGRHPVRLVTPYLGSPPYALPSFWSFHQHKRVTVSPRQRRRPIHHPERGALDCSCPNAPDKYADSKDDDELEREENEVLPTDNMLVTAIVEQNVPQLHFFVYDEPTEYLGPHHDLLLSSMPLCLEWLDYPLSSATKEESMDTEDGPGSRFGNYVAIGTLEPEIEIYSIDLLDSVYPDTVLGNPKETAAHVPEAAGTGKKKRKKAKHRSASEAHHVDAILSLSWNRTARQMLASGSADRTVKLWDLSRDPKEGALRSFGKLHRDKVQAVQWNPTDPAVLLSGSYDRTVRVFDSRAPDASVGAVVGADVEAIRWDPWDNHGFYVRRFSFPSCAMGDLIGTYL	KZP22770.1	5.5e-79	transducin family protein/WD-40 repeat family protein [Fibularhizoctonia sp. CBS 109695]	No differential expression	Not secreted	NA	NA	PF00400.33	WD40
Lactarius akahatsu	Lacaka1|MSTRG.11240	2112	346	ACVAEVPFRYADFDVHPIHRHFLAAVLEDHTNDDPTTVINTLVVINTKTQSLTTIASGADFYAAPRFSPDGAHIAFQQWNHPDMPWQRSAIHVFTFVADGDRITYDNEKEIAWGQREVSVGYPGWIDSDYLVFLTDESGFLNPWAYSVSSKSADPLLATPVSQDFAVPAFTLAGSPYTVLDTEKRVVLFSALKSGRNVLYIFDWKTKSLIPVDNPFVSISAIRGVDDKTLVFQARSTRTPSAIIKLTISDPSAPHSGITYQTLKSSAESLPFPDGIISRPESLTLGTESEPVYATLYPPTNFAYDGSSDPTEKPPCIVNAHGGPTGMAAQGLDWTTQYFTSRGWAW	XP_007309149.1	8.2e-99	alpha/beta-hydrolase [Stereum hirsutum FP-91666 SS1]	No differential expression	Not secreted	NA	NA	NA	NA
Lactarius akahatsu	Lacaka1|MSTRG.4576	6964	347	MSDADMATAMSTLGGQIMCSSSRETIMYQSSHFHQATPLALSLISETVQNASLLPEELDAQRAAAEYEIRELKAKPEVILPEILHDIAYNGKGLGNSLLCPEDRIDTIDAPLMRDFMTQWYRPERMVIAGAGIAHEELVELADKHFSSLKSTPIVDGQTSTPPSPRPTSSIPPHLLHHQPPNLLKSLTRAASSYLSNTPNPVSSIIGSTYTGGYRFIHDPESEFNHVYIAFEGVGIHDDDIYELATMQVLLGGGGSFSAGTFPPYFRFIFLLTPTHRRTGQGHVLKAVHSHPEPPCGGRPLCFFPSHIQRFVAIRFVRIIRAICSSCSSSIPRTSARATVVSGCTTR	XP_007307667.1	3.7e-99	mitochondrial processing peptidase [Stereum hirsutum FP-91666 SS1]	No differential expression	Not secreted	NA	M16B	PF05193.22,PF00675.21	Peptidase_M16_C,Peptidase_M16
Lactarius akahatsu	Lacaka1|MSTRG.10494	8932	348	MFAQMCEAVATCHDASVFHRDIKPENFIVTDGWTLNQDGIRERKVVVKLSDFGLSTRDTVSSDMDCGSAPYMSFGTTPMLHNLYFSRLISLHRVQKQRGPCLQAPCCGCVVSRHCPHQHVRDVSSCIVFFFFLFASRDRRSPVLIACRLYHYNPWTDTKRGECTSFNLYLSNPTDFFMRRFAGMTLPVANFLVENVFCILDDPTDDSQRIGAREFGVWIRDLPTLMRASQPATHTHSRVPSTASILGHPLALCSGFPPPPPLFSSAPPLPVAHPAGHLLFFVPSLKALPWTPSIITVPIARILPHWTSCLMRMTRTKSSNSKRRMGFLHLFAPFLRPSGGSVGVRARA	RDX50141.1	9.5e-63	kinase-like protein [Polyporus brumalis]	No differential expression	Not secreted	NA	NA	PF00069.26	Pkinase
Lactarius akahatsu	Lacaka1|MSTRG.5684	5798	348	TGMCYMVLRTFEWTFMIKEPIRKYELTTHQGAPTRSKRPLSISSVLLDGLDLFFNLRGIGWSWSPQSSPRWTTAPPSIPSLFASFLLKITMFDASQYLIQLSCPAVSSNPSGGSIFDSNLSLLPRIASAVFAGICGAIWAYLLPETMYHMAALIGRVVCRQPASYWPPISHRPWLSTSLHEFWSYRWHQLSRHIFVTFGARPGGALLGQPGALIGAFAVSAVLHHFAMWGIGNGSEFSTVGGFFLLMGVGVAMEVGFKKVTGMRVGGFFGWLWTMLWVIVWGIFLIDAWARHGMLATEFFPTGLRPGKPLVAGVIGLLNVMVNRWDVGLGKLNESALQSMIDLSSNAR	XP_009545475.1	4.3e-71	hypothetical protein HETIRDRAFT_126468 [Heterobasidion irregulare TC 32-1]	No differential expression	Not secreted	NA	NA	PF13813.7	MBOAT_2
Lactarius akahatsu	Lacaka1|MSTRG.8328	2397	348	DDRAYFVDVLASFLASPKFTRHELSEYVLPAVHSESSAAAQSAPTYALELAHALAFRNGLGHALCGPPRRREHHDGGRPGSTCPRSRQPSRGPRHGHLHRVPRQAPREFLLCAQNGFCDARVRDPRRPRDGLPRRREPRRVGPWPTGRLCRLWQHRVRVRPRAPRPSGAPEPSAGAQVGHGRRAARVCDPRRRVRAERAAAVLGRDARRRAARGRGRGPLTEGAKAVVGAFKDAAAGKVGKEELGRAVARAKFQLAAGVEGREGYVGAFGPKVLRGEAANVQAALEGVQGVSGTSLAQVRPKKNAALRTDVDIPLLQVAANLVKGKSTYVAVGDLHTLPYADEIGLSA	XP_009547907.1	2.1e-30	Metallo peptidase M16B [Heterobasidion irregulare TC 32-1]	No differential expression	Not secreted	NA	NA	NA	NA
Lactarius akahatsu	Lacaka1|MSTRG.1684	3049	349	MLGRASARVDENSRKRMRAARPVRTLRSPLKGKERVRSAAATRSLDELHDHTNLLPAASEHRTSTSGAHYSSLPIVPPNVFPSQTVGDTTLTDADVDDVPIMDVESGACAGTINNTGDSGSTRARSVTQDVPPCSLTTRHPQRCAEPPSPTPVRPAPITRHPPPQLAHPPKSMAAASTAPIQPTSLASPPIAPLASAFPRHPVPTPTRPPVDAVAGAATKKGMGVSAAPMTPESLPRRGTSAFTTTITASQLSLSSSQGPRRALGMTRTAPSSASASASSSKVQHSAAVKRPFRPPRVHVPTKRQSQQQQQHWQQKEAKSSGLSDPDSSFDLAFDFDPEALEVAMRPYD	NA	NA	NA	No differential expression	Not secreted	NA	NA	NA	NA
Lactarius akahatsu	Lacaka1|MSTRG.5403	4326	349	MLAWRRLVHVCQRWRQIIFSSPRRLDLQLFCTHGTSVRKNIGCWPAFPISIEYHAYWNPGSDKSLLPNDEDNVVAALEHSDRIRCVKLTLTSSLLDKVATVMQEPFPALTLLRLSSEDQNVPILPHTFLAGSAPSLQEIYLEGIPFPSLPTLFLSASGLINLQLHNIPRNGYISPQALATGLATLTRLETLSIRFQSSDPNFRSILTPPLARFVLPSLTMFGFRGNSEYLEGLVAQIDAPRLVFSRITYFDQLTFQVPHLSQFIGRTENFGLAPLGHAQVGFRGNNIYISLVCGQGALRKSYFFLQVSCQGFDWQVSSMAQILNQSSVLLSHVGHLSIHCASSATRLEK	KZV72985.1	4.8e-06	hypothetical protein PENSPDRAFT_683210 [Peniophora sp. CONT]	Repressed during mycorrhization	Not secreted	NA	NA	NA	NA
Lactarius akahatsu	Lacaka1|MSTRG.10564	4562	350	MFIMTLQSFEWAFLIKEPLRKYEITTDQNPPTFSKNLKPLSISSVLLDGFDLFFNLRGIGWSWSSQPSPRSTTPPSSIPSLFALFLLRIAMADASQYIIQRVSPAVISGPSGGSIFDPNLSLLPRIAAAALCGICGGVWTYSLIDGFYYLAALFGRVVCRQPASHWPPVSNRPWVSTSLHEFWSTRWHQLFRHLFVTFGARPGAALLGRPGALICGFAVSGVMHNYAAWGTGYGSDFFSVGGFFILMGAGVAMEVAFKKSTGVRVGGFFGWLWTMLWVLVCGTFMIDSWGRHGMLATTFLPARLRLGKPPVDAVIGLLNVAVDRWDVGVGLGKLNESVLRILDMSSISPL	XP_009545475.1	1.5e-63	hypothetical protein HETIRDRAFT_126468 [Heterobasidion irregulare TC 32-1]	No differential expression	Not secreted	NA	NA	PF13813.7	MBOAT_2
Lactarius akahatsu	Lacaka1|MSTRG.4791	7197	350	MSTYTPCFPPNPSSASSGVSGSFSVRLSRAHLALASVSDHIQRPPSPTSAAVDLDRVGQLRLRFRHAVASAYRDTSSGKWAHVSELARLGCTIGRWQGVCSGSKAPHSHYQTSAGNRKYQGEFSKRTRFAVRTHLQAGVVDDDPQPEVNPYPRPPVPTFDLGEIRERVENWQANVASAPLSQADPDPLHSTEDAERLSPLNFPIVKRRKSDVARAMKRKRKASPHRHYTTSRYFRGDGLADRMSRHEAQAVNRDAECVTPASRSVPPGSNAELTPHSRAESPEIVRKLSPTPVANTAPVPESIHQIAEVRQSHAAICSRFGCYLSSFARRFCHPRSRHNFKHPPRHTVIG	XP_009541986.1	2.2e-06	hypothetical protein HETIRDRAFT_470146 [Heterobasidion irregulare TC 32-1]	No differential expression	Not secreted	NA	NA	NA	NA
Lactarius akahatsu	Lacaka1|MSTRG.5698	10823	350	MTHGGTTLSISGVSIIQANALLGASYQLYRHVETNETVIRTVGYALPTALHGLVQTVVPTTCFSTPHTQWQLPRKRSGGAMSGEPGPMTALLGRDDDLTTPSFLRSLYTTIEYRPAAPDRNALGIVGILNDYPSPEDLATFMSIFRSDGTNAAMTVVQVNGGAYDPTNPTDESNLDTQYAAAMAYPTPVIFYSTGRGPAGTTDWLASWLGYILMEGINIPQTISISYVIDERLTSEEYATYMCIEFGMLGVLGVSVLIASGDDGVGKGDCVTKDGSVRFVSHFPATCTCSILSQLGRSTERVTHHTLYFSQVPMSQPSAERRVTDQSSRQASLGEASRTTFDAPTTRRRP	XP_009548822.1	1.4e-58	serine protease S53 [Heterobasidion irregulare TC 32-1]	No differential expression	Not secreted	NA	NA	PF09286.12	Pro-kuma_activ
Lactarius akahatsu	Lacaka1|MSTRG.5683	5551	352	MGMCCMALRSFEWTFMIKEPIRKYDLTMDQDAPKVSRKPLSISSVLLDGLDLFFNLRGIGWSWSPQPSLRWTTAPPSILSLFASFLFRVTMFDASQYLIHLACPAVSSKPGGGSIFDPNLSLLPRIALAAFASICGGVWTYLLLDTLYHVAALIGRVVCRQPASHWPPISHRPWLSTSLHEFWSYRWHQLFRHIFVTFGARPGGALLGQPGALIGAFAVSAVLHHFAMWGIGNGSEFGTAGGFFLLMGVGVAMEVGFKKVTGMRVGGFFGWLWTMLWVLVWGMPMIDAWGRHGMLASEFFPTGRRPGKPLVDAVIGLSNVMANRWDVGLGKLNESALQSMIDLSSTTFFDSS	XP_009545475.1	5.6e-71	hypothetical protein HETIRDRAFT_126468 [Heterobasidion irregulare TC 32-1]	No differential expression	Not secreted	NA	NA	PF13813.7	MBOAT_2
Lactarius akahatsu	Lacaka1|MSTRG.6825	1306	353	MGQVSTQRDQGDSTPLHMASSRGYTKTVELLLQHGADLHAQDQNHSTPLHLASYREDAEIARLLLQNGADPHARDRSRSTPLHLASSEGNDGAVTLLIRYGADVNARNANHSMPLHLASSGGYNTIVWLLLRHGADPNARDANRSTPLLMASAGHFSLPSFLAASRFHAEIVQLLIERGADVNASDRNNLTPLHVASSRNAIAALVLTAHGADVHARDQNHSTPLHLASSEGNAGAVSLLIRYGADVNARNANHSTPLHLASSWFHGDAAQVLIQHGADVNAYDRSYSTPLHLALSRQVPVADVVRLLLRHGAYVSVDVEDDKGLTPFQIASSRGQNEIMRLLLDYCAVGGVD	NA	NA	NA	No differential expression	Not secreted	NA	NA	PF00023.31,PF12796.8,PF13857.7,PF13637.7,PF13606.7	Ank,Ank_2,Ank_5,Ank_4,Ank_3
Lactarius akahatsu	Lacaka1|MSTRG.6476	3168	354	MLLSPPSPPSPYRFSPQPPSTQPTASSSTRSLSVITVPTSSYPSLQNYSFSPASESSLPHSDPSPNSKTSAFFGSPFESPSSLLSSNSSQSVTNVSKTSAFFSSPFADFPTPPPNQQTTPREVPSSSRSLTADFFSSTPFSSCPTSPPSLRSSTSSSSLRTSPSQAPSPPHYSTALPPDQTEDSDATPVSKPRTPLLARLFPSRFSSNARRTDDHRLSTERDFVDLEPPEDVLGASPSTLDSPSIAIVAPPVESYAAGALVHPYNEDELSYRLVRQVGHGAFSLVWLAHVEKGRSEGTLVAVKMIARAGEQNDGVARRAARGERVSFMREVEVLHVRELRQVSWRIETEVTYSI	KIM87387.1	5.2e-08	hypothetical protein PILCRDRAFT_3869 [Piloderma croceum F 1598]	No differential expression	Not secreted	NA	NA	NA	NA
Lactarius akahatsu	Lacaka1|MSTRG.5700	12100	355	MVHRLGHERHHLFQRPHSMFSGPVDAPAHPRPGRISRPGPPSDPSELPMPMHRPPMFPHHGLSRSALQHQKWLWNTRYDEWMQWRADVDSAEAAEMDAYGGITNPSAIELPPPPLRRASSSSPVLPESEYVGKKAEMNEKIFPRTGDLTDLHDPQVVRLDQTFCNYPLWTIQKVLLVCSMDTAARGEGPCSSRDSERADDNQETEGALESDSTIPLLTRLRWEQSWHTRWEVLTALVRMTERAVLAQGPTTIPATVTTPIGLPVVARSLTDVVMDSSATRVPTRFFLAGSERLGGVDGSESDEDDDEDEDDYGEILLNPRFSIQRSVPDGCGLGRPLHAQILPLDARRGVKALRS	KZV67830.1	2.5e-34	hypothetical protein PENSPDRAFT_40712 [Peniophora sp. CONT]	No differential expression	Not secreted	NA	NA	NA	NA
Lactarius akahatsu	Lacaka1|MSTRG.7133	6873	356	MLTACALVCKSWLSLTRRLLYHSLTVESSRAYASRKPGTLGPEALLHRSHLLGFIRSLFIRVIDESTATLTLFSDVPQGSQECVRIPDFLSLLSHTPRLRDLHLSVDWAHKNTHSFEPHVLGWLSSLELPIEVLDLKYGRPFDSPLVYDLVGIWPTIRALRVLTGYSGLPPEVSSLSLRELRLPITSLATLIGWLLPHPPPNEPSNLQFLELYEISEDARAVLSVHGPSVSTLTLTRQPAFGIAHLFTKLEELVIAGPFWSSPLPTFPQTLKHIRLQVHAFMSDDVSAAIAQVLPILPDLRVITIEETLTHDKHYSDLQEACETHRVEILVNSVDPSGRMVVSTRQVYQLVCDVAH	KZP33672.1	1.1e-18	hypothetical protein FIBSPDRAFT_811063 [Fibularhizoctonia sp. CBS 109695]	No differential expression	Not secreted	NA	NA	NA	NA
Lactarius akahatsu	Lacaka1|MSTRG.2024	2522	357	MHEPFPVLAHLNISSKGRRVPAPPAEFLGGSVPCLRKFKLCGIPFPALPTLLMSASNLVLLVLQRIPPTGYISPEAMVASLAPMHRLRSFEISFKLATFHPDQIESPPITRTVLPALTRFTFQGASESLEDLVVQIDCPQLNRISLDYSSQRFDFRVTQLSKFVDLSVGPKLSPLGRARLDFFDGQADLTLSATHSFPDQRRARILVSCNARYRNFSRITQVLSDLSVTLSNVVHLELSYRYEEKDEFDVDTDPVEWLHLFHQFPTAKTLRVCQDLAEHVAFVLGDVTEEMDDEVLPSLDLIFLEFQSASSIKRFLAARQLSGRPVTASATEMEFNERLKPLFINEQVNVTYRLLTL	NA	NA	NA	No differential expression	Not secreted	NA	NA	NA	NA
Lactarius akahatsu	Lacaka1|MSTRG.5774	1077	358	LFSAAVASLISVSIQDIRPNPQDTSNFYLANIYQTLANPGSNISSSLPASPPPFSSPNHAVWVNALWFLSLVISITCALLATLLQQWARRYLKVTQPRYSPHKRARIRTFFFEGVDKFLLPWAVEALPMLLHVSLFLFFAGISVFLWNVDLTIFKLVLSWIGICTALYGCITFVPIFRHDSPYHTPLSLPAWYIVTGISYIIFRVLWRLTMSPYFSTRYFTRFLSLEYRYRKRLAQGMKKTAEETSLNAPPEIDTRAFLWTFDSLDEDHELEHFFSGLPGFRNSHVVDDPLLCLTEKQKWKLSTALMTLLDVTFSSGLLPDTVKDRRAIICAKASDPVHIPRVFGVFNKILSRYQYSG	KIM88358.1	3.6e-41	hypothetical protein PILCRDRAFT_814257 [Piloderma croceum F 1598]	No differential expression	Not secreted	NA	NA	NA	NA
Lactarius akahatsu	Lacaka1|MSTRG.3111	6176	359	MHQLKMLDLHSTSPIAPPGALFPSGVERTVTLASLEHLNISGSVRDCGLALAHLLLPALTRLYFTTTSFSLDGSDAQEVLPYVARHAHGPQDAQPLQSVFVRNDRRCADMLAWTQPNIDVKSYNLVTFFEAMVFARVAFSVTNEDWAPETHAEIFEAAMTALPIDSLVTLTSQVCTSSPHTQSWLRQAPRWPLLQRVHLATHAARGFTDMVLEDSEVRECPLLPSLTNLVLVDIALSARRTLRLCDALMKRVEQGVPLETLDLRTCFATSRTIELLEEIVVDVLGPEKTVQERAQIRVMWDSVARDLFVEDDLDRAGPFGEEEDCDEDDPDTGSDDEVWDNWNSDGDSDGYDEDETDYW	NA	NA	NA	No differential expression	Not secreted	NA	NA	NA	NA
Lactarius akahatsu	Lacaka1|MSTRG.7035	5288	359	MSAICANATLSPMDELDLNIQLGGSLISLSRSSTTASAPSALAISRHPQEPPEQSGTPGSPPGTSSLTPLETPIPSGHTIHTQLEGTIPPIYDGTGGAARRWFNRVELHFLVNQQSTAAKDPLRKVGLTLCWIHGPGVDDWVDSQINWLMEQAHERIAVADPWGVFRQTFLEFFSYPSDVRRAMADLEKLKMEDGDVDEYIGTFTNLADLAQLSLDSPLTLEMFRAGLPKPHVQKCLLSANDWPNTFEEWCASARRYQKDIDTFNSPWVDKGMANVDDENDRTFWTSNSGNQPAQVSSRHRQCATNIGTKQRATTEKDKEKYLAEGRCFRCGERGHISRNCPSRMPQTPSLGGLMDGVY	KTB47158.1	2.9e-14	putative reverse transcriptase-rnase h-integrase [Moniliophthora roreri]	No differential expression	Not secreted	NA	NA	PF00098.24,PF03732.18	zf-CCHC,Retrotrans_gag
Lactarius akahatsu	Lacaka1|MSTRG.8246	7393	359	MHFYIHSLPPDAEIRVPASITVPLLEVCAQLQLPPVITYSDDVLYNWALKDPSAKPKLALDNLRSLTLFTGTRDEEEFYLTSARIELCGVDALEIMRVTMDELFVGDALAARRITRYLHSLARVLDDLARLLLAIRDGCDPDTFYHSIRPWFNGADSGTRKWFFDGLDAHPELVLPTELSGPSAAQSPLIHALDVFLGVDHTPSPSSSPTFEPAHAHVPPKVPFLVRMRAYMPRHHRNFLQHLAAAPRPLRVAVERTGSAALTDAYNAALAGLRRLRDAHLRIVALYIVGPSHRAPPASHTPALKGTPGAVKAGVFVNGTCSGSGPTLLRGTGGTDLIRFLKGVRDRTSEAALELDGST	XP_007299326.1	1.4e-112	Indoleamine 2,3-dioxygenase [Stereum hirsutum FP-91666 SS1]	No differential expression	Not secreted	NA	NA	PF01231.19	IDO
Lactarius akahatsu	Lacaka1|MSTRG.11987	10962	361	MSTAVQKPFPVLTHLCLSSNDENVPALPDEFLGGSAPDLRVAHLEGILYPALPTLLSSALGLVDLRLQDIPSEGYISPEAMVASLEALTELRSLFIGFKSPTPPSRTIRPGPITRTGLPSLLTFEFHGVKGYLEDLFTRIDTPRLSHFRISYFKQLDFQVPQLSKFIGRTQNLYQARFKRAQVKFDANDVHVSLYCEREELFESHFSLRISCQGLDWQVSHVAQTLNQSVAMLSNIGDLSIDTRDSPPGEKGDMVNNEWLELLRPFTAVETLHVSGKLAGHIIDGSEGVTRGVVAGMLPALQSLCLEDEPLTSIGRFVEICEFSGRPVTIVHAPGEFFIVRLSQSHGVGKSHLTFKLKMMN	NA	NA	NA	No differential expression	Not secreted	NA	NA	NA	NA
Lactarius akahatsu	Lacaka1|MSTRG.5818	9719	361	MCFEDQTTPATQGPNAAPQLKGKHKEGINVLGSVTLHDVDMLERESRTGRGWIACTTDTVFLEKPQYYDLLIDLTSYAPTERRATARPGLQLAIKELSARRPTYRLSTIRFTWSDVKLVRTPGAQSFSFLNRGQWTELDRILQLDADTNGVARARAHRASAPVWAWADAWGVYEDVCVVCARLCSGLWRSDNSNGSSGSREQWGSPRERSGRRRAHVRAYGDGIEGRRSSYRPQDDDDVGKYGSGSSGDEDEDGAVLVRSRQTRTTLALLQTFHAQTRFLLSRLATVLPSTASPLPDAQLTPRDLLVLALGPLSSLDARFVEWLAEEYAGGARVSVRRGWRDLLGGLVGAAVGGSGTASSS	XP_009551427.1	1e-67	hypothetical protein HETIRDRAFT_421978 [Heterobasidion irregulare TC 32-1]	No differential expression	Not secreted	NA	NA	PF09804.10	DENND11
Lactarius akahatsu	Lacaka1|MSTRG.4448	5249	365	MGSQLEKIATALQEPFPALTHLDISTVRLREYVPILPAEFLGGSASYLQEITLSGIPFPTLPALLLSASGLVALSLRNIPPTGEIPPEAMVACLAALPRLKTLHIAIRPPIPSLDRMPPPPVTRRTVVPKVLPTLSYFEFQGTSEYLDDLISQIDSPQLDQIVVVYHLKWLVDFQAAVTELSRFLDRTGGSKSTPFNHAHVAFLADRIALDIYDTNYPDRDGRRAKIVISSFHWQVSHMALVLSYFFATFTTVVHLKLKVELESYWQLEAAEDRWHRLLRQFSTVQTLSICQILAKGVARTLENIPEEIAEEVLPSVDLICLQEQRVERVEKFVTIHWLSGRPVTVVDTKAEFDQRLKSLYNVVF	NA	NA	NA	No differential expression	Not secreted	NA	NA	NA	NA
Lactarius akahatsu	Lacaka1|MSTRG.8760	5194	365	MSKDRTGLTPLHHASRHGALDLMEILLKGGEDVNVRDARQVTPLHLASHHGKLDAVGFLIERGADMNVLDTYIGSPLHLASIYGHLEVAALLVGHGADVNTQNTLQETPLHSASAYGRLEVTELLVGHGADVNRQNNSQETPLHCALDKGKLDIARFLIKRGSNVGSRDRNGKTPLHAAAERGYLDIVEMLLETGADIDARDKRDSSPFDLAPRFWQWEITWPLAKRFGPPEPVNPWHGNRKTSLHVASEEGKLEIVRLLIDRGEDVNCRDGQGHTPLDLSSQSEHLDVARLLLDRGADVDTTCQNRLTALHNAASQGYFEIVQLLIERGANVNAVGHHGFTPLQGARLNKRNKVIQLLVEHGAT	NA	NA	NA	No differential expression	Not secreted	NA	NA	PF13637.7,PF13857.7,PF12796.8,PF00023.31,PF13606.7	Ank_4,Ank_5,Ank_2,Ank,Ank_3
Lactarius akahatsu	Lacaka1|MSTRG.10676	4502	368	MVHFLDMDKPHFSAWVRIQGLNDLLRFSASEQPRAAPAPAAPLYFAAESGLRGLVERTIGKHPTHLNTWGGVYGTPLHASVLGGHIGIAQLLFSHGADVDARSADNWTLLHLASQEGHLDIGKWLLDDRGVAVDPRQAKGWTPLHMAMPNGRLEVARILLEHDAEVNAQDHDGRTPLHYSSWKGHLDVVRLLLGRGADARICDNNGSSPLYFAMTSRQLDVAQILLKHGAEANARDDYGGTFLHCASAQGHDDVVQFFLDRHADVDARDKGGNTPLHLAASNSNIKVARILLEHNAEVDARNYEGSTPLHKASDGEPDVVQLLLDYNADMYACDDCGDTPLGIAAATESFEVARILFEHGMRNFPLPE	NA	NA	NA	No differential expression	Not secreted	NA	NA	PF12796.8,PF13857.7,PF13637.7,PF00023.31,PF13606.7	Ank_2,Ank_5,Ank_4,Ank,Ank_3
Lactarius akahatsu	Lacaka1|MSTRG.6033	8559	368	MLSNRFRWVFCQLEALQDCLPASVRRTLKELPESLDETYERILKEIKRPSRDHARRLLQCLTVAIRPLRVEELAELLAYDFDAAEEGIPKVDPNWRWKDHERAVLSTCSSLIAVVDDDGSRVVQFSHFSVKEFLTSDRLATSSGDASHYHISLGLAHTLLAQACLGTLLSLDDDDDDDDDDGGSHSADRDGNGFPLASYAAQHWVAHSRADEALSQLQGGMRQLFDPTKPHFTTWVRLYNVEDAGWRSDPIMERMATPLYYAALCGFRGLVDHLLIKYPEHVNALGGGRGAALHAASARNHVEVAQVLLEHGGDIDVRGTYERSPLQFAAIEGHVEMGRFLLDHGADVDSRQYDLWTSLHHATREWIR	OCH94796.1	5.2e-67	hypothetical protein OBBRIDRAFT_746651, partial [Obba rivulosa]	No differential expression	Not secreted	NA	NA	PF12796.8,PF13637.7,PF13606.7,PF13857.7,PF00023.31	Ank_2,Ank_4,Ank_3,Ank_5,Ank
Lactarius akahatsu	Lacaka1|MSTRG.9002	5858	368	MQHSKPRDEPPVSSPSQPEPEDRDEEEDEYSFYATMAADVVSLEEAEEYWGVRMPAPVGDAADFFFNESDCMQGASLATLVYILTGPQPHTPANDPNLLDTFLLCFRSFCDPVELARVLISRYEEQPRALNRSQHEAWPAYQTSVKARVLRLISTWIDQYWIHERDRIAGLHIKEFMSLVDEEFLPYERAEIIRKLNDRREEAIALAPSGNSAEGSQPDETSGSSSRAACRQNPVQYKGRLQARAEKLIRKVSQPAPTDDELQWAKALDDLMCNSDNPIHILDMNSRELCQELARQLAIFMSDGYLRVIPEDLWYRFSMGHGCDVDTARSTQQTYENALASWVTGSILGQIEAETRAAVMTFFIALAL	CCO30774.1	1.3e-14	Cell division control protein 25 [Rhizoctonia solani AG-1 IB]	No differential expression	Not secreted	NA	NA	PF00618.21	RasGEF_N
Lactarius akahatsu	Lacaka1|MSTRG.4887	3387	369	MLMDGLFPILEHLSLESLSFTVDKTSTLTLPKTFQAPNLRHLALLGIRLPKRLRFLSSTVSLVTLVITNIRASGYFLPRLLVARLQSLPQLEELSVGFSVPIPRPSAERELLSRQGTPVTLPNLKRFTFQGVIAYLESLVAQIRAPLLEQPEITLFNQTVFTLPHLSRFVNTTERIKPDTAEVIFGPDNAVSIIMEYSTRPHDDHFVLRVTCKQMDWQVDCAAQICNALMPTLSGVEKLTLSLYEPTMPTRWQNSEIDGITWHELLRSFIGVKELSICQSLSEELSRALEMGGAGSDLELLPSLQELVSDFQGMHADSLFGSFVHARRVVGRPVRSTFPFSPSHPSPDLQTPRQLAPLSMSMSWRRLPP	NA	NA	NA	No differential expression	Not secreted	NA	NA	NA	NA
Lactarius akahatsu	Lacaka1|MSTRG.7034	2192	369	MTPYPASASRYVGQTIDNGALRIESILGAGSFGTVYRAVDTRTGVHYAVKRVKMEGPESYHTRERQLHARVSSHPHVLTFHREFHEGRYAFYVYDLCAGDLHSVIRKVAFFREDELIKRVFVQIIDALEYCHSRGVYHRDLKPENILVSAQSGDIDVFVADFGLATTSKMTASSCGTPCFMSPGMCTLCACPPSHPLNRHFCHRVTGAAPRTLLYRPRRYLGTRLHPRRDDRQRTTLVVGFPRGRRLQRLLDGSRRSIRHPPRLALRVPAPSQNILHQARVPAVTRRDPRRGARVGHIFPYQSGGGRVWMGRSPGEADAAEDARVRSRSRRAGNAPLVGDLLVFWVLRDLQLRVIVGVVLFQRLVVLGI	XP_021872942.1	3.5e-31	kinase-like domain-containing protein [Kockovaella imperatae]	No differential expression	Not secreted	NA	NA	PF00069.26,PF07714.18	Pkinase,PK_Tyr_Ser-Thr
Lactarius akahatsu	Lacaka1|MSTRG.5854	10053	370	MSERLTYPPLESSRNGSALCVTPATMPPHLLQNAPTVSLPSQNTLESKTVSLSPPTCLLSRLRPPFLASLPLFVPARSAAFATAEARLYSIKLRFPPRCNSRRTQSPTAKKKRQSVRRSAFYVVIDITASALLVSDSPPLAESSSIVKTPPRPNPSRDQRPQSQPRTRSLTPSLTCTSACSSSDNPTTPLTSGDEWPGLGSSSAKSPRSPARAEPPARGHQVDAHAARLGPRSYLIQRRGGTGRGRVVARTRTRPAFLARLRHAHSSCRTRLACTQARSPRQGQAVSPPTPSLARLRFYLGYVRARRTGSSDGHNAMPETRARRSSEPSTNSGDNGERADTCVRSESGHGEADAESCLRRNPIPLKFFLQ	NA	NA	NA	No differential expression	Not secreted	NA	NA	NA	NA
Lactarius akahatsu	Lacaka1|MSTRG.6675	2426	371	MFFFISAFRSAFVIVVLTFASWLYTRHRKSAKGTYPIKILQTVPRGLKHVGTPNIDSQLLSALAPKLPVATIILLLEHISIAKCKPGFIRHLSDFLTHVHSAFGRINGYKIDPNQELVAIGVTNTVGTAFGAYPATGSFSRSALKSKSGVRTPAAGILSGIIVLVALYGLTSAFFWIPTAGLSAVIIHAVADLVTKPPQVYKYWRISPLEFFIWVAAVLVTIFSTIENGIYVSLATSGALLIFRLAHPRGRFLGRVRVHANDSNTSHSRDVFVPLANNHVINPQIRVEPPPPGVLVYRLEETFLYPNCGVLNSEIVDYVKANVRRGTDVRLIPLSDRPWNDPGSRHGADSEWEENQSKPVLHSIVLDFSTA	KZV70468.1	1.5e-135	sulfate permease [Peniophora sp. CONT]	No differential expression	Not secreted	NA	NA	PF00916.21	Sulfate_transp
Lactarius akahatsu	Lacaka1|MSTRG.8239	5846	371	MLGASYQLYRHSTVNDTIIRTVSYALPEILHAHIQAVAPTTFFASTRTAQQTARRRPVEAAAVLAETEAVSGKPVTVLSGRDDEVVTSSELRWLYKTSAYVPTAADRNALGVFGYHNEYPSQTDLTEYMTYFRSDVQPASLATFTVELVNGGGYDPNTPGVEASINVQYVSAMAYPTPIIFYSIGGIGEWSDSGELLPGDAYLEGIEHLLRKTDIPQTVSISYGTYEHTVPREYATALCVLFAQLGARGVSVLFPSGDNGVGKNCEDASGNVRFVPEFPSSCTCGILSPLKSTTQACRGFAGPYLTSVGGTTEYEPEVAAPLSGGGFSDYFPRPRYQDVAVSAFLERQGTQYAGLYKCARRCQLAQPFLTL	XP_009548822.1	2.1e-76	serine protease S53 [Heterobasidion irregulare TC 32-1]	No differential expression	Not secreted	NA	NA	NA	NA
Lactarius akahatsu	Lacaka1|MSTRG.10472	8414	373	MRNDWNNPELGEHLPEEHFSVGEATRALFAWGTLQSVTYDWQVTKWSKYLSEIPREGPIPDIHTRMRNNSIINVTGDVLLEGNKGQILTADITETVSGADSLAVVPRHHPNLPVPTPHPKSQKDLRLTLRRLSKMCLAGYGGASLLFFGVPSNSPINSSEEKATLEAAVEESEKPQEDTQIRTFPWWSMLLGKHDHDIFLHYASGGKRGTDVTAVIGDEARMPRFWVLTDHSRQQIVLVFRGTMTLNEVAVDLTCEPEEFEPASGDDEEEDYDSDSDGEYGDEDQEGDDTDVPGSMPSGSDQLLRVPNSRRRLRSASFRSVNSFEEKHRYLVHGGILKMSLAMGGRGRPVFTAVKEALSRNQGYGKSCSYSHE	XP_009544078.1	3.9e-78	hypothetical protein HETIRDRAFT_381918 [Heterobasidion irregulare TC 32-1]	No differential expression	Not secreted	NA	NA	NA	NA
Lactarius akahatsu	Lacaka1|MSTRG.2025	2032	373	MTDSQLGKVVTLMQEPFLVLTHLRISLGLGQLGEANAPVLPTEFLGGSAPRLQEITISGIPYPALPTLLLSATGLVKLHLFNIPPNGYISPEAMVASLATLPRLEILAVTFQLTASHPDRIHPPPETRTILPALISIRFMGDSGYLEDLVSRIDSPQLHQISTVYLNQVADFQITQFSNFVNHSVGPKTAVCKHAQFSLFPGGVAFTMCPHANRSPWDLRPVKTIISCQGIGWQVSNVAQVVSQISAIQINVVHLKFTDLMGCLFEGTADDVAWVHLLRQFSAVQTLHVSQGFARHVALALEDIAGETVDEVLPSLDLIYLADQPTSSIEKFVAARRLSGCPVTVIETETEFDERLESYTGEEENDPYELPTL	NA	NA	NA	No differential expression	Not secreted	NA	NA	NA	NA
Lactarius akahatsu	Lacaka1|MSTRG.6067	4810	373	MTDSQLGKVVTLMQEPFLVLTHLRISLGLGQLGEANAPVLPTEFLGGSAPRLQEITISGIPYPALPTLLLSATGLVKLHLFNIPPNGYISPEAMVASLATLPRLEILAVTFQLTASHPDRIHPPPETRTILPALISIRFMGDSGYLEDLVSRIDSPQLHQISTVYLNQVADFQITQFSNFVNHSVGPKTAVCKHAQFSLFPGGVAFTMCPHANRSPWDLRPVKTIISCQGIGWQVSNVAQVVSQISAIQINVVHLKFTDLMGCLFEGTADDVAWVHLLRQFSAVQTLHVSQGFARHVALALEDIAGETVDEVLPSLDLIYLADQPTSSIEKFVAARRLSGCPVTVIETETEFDERLESYTGEEENDPYELPTL	NA	NA	NA	No differential expression	Not secreted	NA	NA	NA	NA
Lactarius akahatsu	Lacaka1|MSTRG.2019	1523	374	ALEHPDRVCFIRLNIRKWQSERAVPSTHWQEPFPVLTHLEISLGTRAESALVLPAEFLGGFAPRLQEITLSGIPYPELPKLLLSVTDLVKLDLFNIPPAGYISPEAMVASLATLPRLEILVIGFQLATSRPDQILPPPVTRIVLPALISFRFRGASEYLEDLVGRIDGPQLNQISTVYLNQVVDFQVAQFTMFVDRSVGPKIALFRHARFSFSRDSVTFTMCPHANDSPWDRRPVRTIISCQGIDWQVSHIAQVVSQISATLVNVVHLKFTEFWGCRFEGTDDVEWVHLLRQFSAVQTLHVSKGLAGHIALALEDITRGMVDEVLPSLDLIYLADQPTSSIEKLVAARRLSGRSVTVIDTETEFDERLESYANE	NA	NA	NA	No differential expression	Not secreted	NA	NA	NA	NA
Lactarius akahatsu	Lacaka1|MSTRG.6539	7559	374	MNLTTDYEDDVIAALEYPDRVRSIKLSVTSSLLEMATPMIQEPFLALKGLWLLSKDRNVPVLPDAFLGGSAPQLRQIHLEGISFPALPTLLLSASNLVYLRLQDIPEGGYIPPQAMITGLVVLTSLDSLSICFTSPTSRLEPIYSGSPFSTRGVLPSVTTFNFRGSSEYLEHLLARINTPRLHCFEITYFNQLDFRVPQLSQFIGRTESFELAVSRRASGHFRIKNDYIEFCCEEKGRSRSRLTLRVSCKWLDWQASHLARIIGQSPAIVSGVDLLLINEVDLQLEPGWQDTMDGVDWLELLCPFTDVKALQGSMQLAGHIALALDGVSGEMVTEVLPALGSLSLEGQTVGSVERFIAVRRHSGHPVTFNQGSE	NA	NA	NA	No differential expression	Not secreted	NA	NA	NA	NA
Lactarius akahatsu	Lacaka1|MSTRG.6090	3135	375	SARLLSLPSVSSSSATSRRKTAQGRRKKRNNVRAQGAPSSIPRLWKLQRVLTFCGTGENYRYSMTIDMLPDHVLLEIFDFYRMNRDVLRLVWKWHLLVHVCQRWRQIIFASPHCLNLQILCTWRTPVKKNPGIWPTFPIVIDYGFSEASSRSTWSRGEGNVIAALKHPNRVCYLDLHVTGAQLGKMATVTQEPYPVLKHLNIRSKIGNVPVLPAKFLGGSAPRLQEVYLCGIPFPTLPMFLLSASDLIELDLNDIPPTASGYISPEAMVVGLASSPRLKNVTIEFQSATSRTDPIRLPPVTRTVLPALTDFQFQGAIEYLEDLAVQIDSPSTGSDPHILLESACRLPSYSTPQVYRSLNRPQVDPIQACGYYLFR	ESK93601.1	4.2e-08	hypothetical protein Moror_1607 [Moniliophthora roreri MCA 2997]	No differential expression	Not secreted	NA	NA	PF12937.8	F-box-like
Lactarius akahatsu	Lacaka1|MSTRG.820	15036	375	MPFEDWAILSHPSSHSINIQIYSAQGRRESTIDLVRLKHLTTHTHTNFESLTQDLPPPPPTSEEPEYQVLYTSINTLNDDILLGIFNHYLPGARDNWKPRLGWFELAHVCRRWRRLIYESAFHLDAHILCTKGAPVGDLLSLLPPLPLVIDYQLRTVRVQDELEISHVLRLRNRVRRVSLRIPPSNLRGLLVLLENPFPRLEFLSLSSAFDAFDGDMTLTLPKTFLAPNLRHLKLLGVNLSSELPLPSSTDSLVTLTLENIQDFLPKHLITRLRSFRQLEELSIDFSNPLLHSSAERELLDTLETPVTLLKLKRFTFRGFSAYLEGLIAQIRAPHLEQLNITLFDQVAFAIPHLSHFTNTTEGLKLPMTVDYFRE	NA	NA	NA	No differential expression	Not secreted	NA	NA	PF12937.8	F-box-like
Lactarius akahatsu	Lacaka1|MSTRG.10682	6109	377	MLSSHWQLTGSLFTMKVDRMRTSRTMSVQSFTLTQGCADGERRKGTWSLEDSQRRPMECMVVATSLSCLLKTWGRFRWVFCQLEILRHCFPASVLNILEQLPESLDETYERILREISRANREHAYRLLQCLTVAVRPLRIEELAEVLAVDFNASGGPKLNADWRWEDNEEAVLSACSSLVAVVMDGHSRVVQFSHFSVKEFLTSDRLASSLGEESQFHIRLESAHMILAQASLGVLLRLNERIDGNNIVGFPLAKYAADHWPDHVKFENVLSHVEDGVDELFDADKPHFAAWVWLHNIDRSSMLGTSPSQPDAPPLYYAALIGNRALVEQVLSKRPQDLNRGGHHKTPLYAAFVNRDVEIVWLLLENGADLNVWDSM	OCH94796.1	1.3e-70	hypothetical protein OBBRIDRAFT_746651, partial [Obba rivulosa]	No differential expression	Not secreted	NA	NA	PF12796.8	Ank_2
Lactarius akahatsu	Lacaka1|MSTRG.6899	5125	377	MDCAQRRVFIVLDAVDECEPRGAIAILDALLNEDIDSDVPKQLKVLTTSRPEAHLRQVFCAQGNIRKLNLQDIEAKSDIRHYLLMAFKWPPITLATPFDASEEVIFELAESAGDSFIYAASILRFVFDEHDQDPQRRLDILLGNRTDPEERPYERLDTPYLSIIHQAVPTGASGSIKRRLRTVLGQLVTFREPLPMVVMGKFCGLGSGDVRRALHNLHSLVQVPTSGFQPPRVYHLSFSDFITDIRRCGDADLVVDVDSAEREVLRSCFDHLSLRLDRNMAGIEDPSLPHSEIDGFQMKVENAVSPELRYACLYWASHLMKNKDPHDEKIWPRLQDFLNRCLLWWIETMALLGTLGDAAESMSQVRAWMVGTSACSA	PBK77602.1	6.1e-55	WD40 repeat-like protein [Armillaria solidipes]	No differential expression	Not secreted	NA	NA	NA	NA
Lactarius akahatsu	Lacaka1|MSTRG.6900	4194	377	QIQLIEDAGICPNLQFINTTHCISANLKPDIAIYSGTDRDDPGTQSGSQRSLNRTAVDLWIENKNEKDDVFRDLEEMGREARAKSDLKSHIRWTKGAYRVSGQLIAYTSAIHRSQFRVFSFSVVLFGNTGRLLRWDRSGVIYTEPFNWSTQPDTLFEFLWRLNFLSDVKRGYGTTVTSVADDEAEAALSKLRTYEGLENVAKADLHKLLVRDDHTLNGQIKYFIAPSAVWDSESLFGRSTFGYIAYDPETTNLVYLKDFWRTDCDGIQKEGDVYRELHDAQVPHIAKFGLAGDVPLLPECGRTDSPAVQRTMTQEFVKGCDWCPGQPRVDPYVHYRLVLETLGSPLYTFNSTRELCKVIRDAITGTWALLTYRCCRH	XP_009545032.1	3.7e-52	hypothetical protein HETIRDRAFT_382749 [Heterobasidion irregulare TC 32-1]	No differential expression	Not secreted	NA	NA	PF17667.2	Pkinase_fungal
Lactarius akahatsu	Lacaka1|MSTRG.10752	6115	378	MSVAGPCRYGTHLSKEEVTRLVTPHQDTLELIHSWFTHHGVPSSSISASHGGGWLTLVGVPVSQANEMLGASYQLYRPVGTNDSTILRTVGYSLPVVLHTHVQTVAPTTCFGPMRTPPRTPSVRARAAPADVGSREPVTAMSNRNEPEVITPEVLRWLYKTFAYVPAATDRNVLGIAGYNDEYPSPQDLGWFMSVFRDDAKDPAFTVEKVNGGGYDPSHPGVEANLDMQYTQSIAYPTPHVYYSTGGTLHWTPPSNEPASDDLLLTWLNYMLDKENIPQTISTSNGIDETRLPLEYATAVCILFAHLGARGISVLYGSGDYGVGRGDCKINDGSGRVQFIPTFPASCMCSVYLCFRAVRKRGHKLLTTLLRPHRSLGY	XP_009548822.1	9.9e-90	serine protease S53 [Heterobasidion irregulare TC 32-1]	No differential expression	Not secreted	NA	NA	PF09286.12	Pro-kuma_activ
Lactarius akahatsu	Lacaka1|MSTRG.1071	6718	379	MEGDTTSIHGSYLGTVVHGGATDELAIWNWKTGEREWGMPLDKGVGQWCFLDDAHILFPKNVFAGSPVLRARQRRLHVCRFRSVRGVLPPQQEDPVPERVFVLPDPRYPHGSSMGARLLSRPTPDPSASLSAFAAGELFHPSAEDHLLTVELWAYYASGWEVTDLHIPTRVLLSTPPRSASGNDAPVRGPRIVPWSAWRHAITQSPPLEHPRDMAPLGPLAHGMRRLSWTCGTNSRFRAVRSTAQHSRPSSASSSSLRRKTVSVWDLHPGRTEQALAALRCSGSVSDGSAGGTAVIQLACSCGGEDDDDGRSRAIAAAPPSSEQQPQQQAEWPYVLSEVPLPREIQEADPIGIKFAMCGDALVVLEVSSARFNLSSIIF	NA	NA	NA	No differential expression	Not secreted	NA	NA	NA	NA
Lactarius akahatsu	Lacaka1|MSTRG.2422	5587	379	MTSSLLEKMAAVKWKPFPALTHLWLSSNDGKVPTLPDEFLGLLAPSLQVIHLEGISFPALPRLLSSALGLVDLRLLDIPRDHYISPGVLVSSLAALTGLRTLLIGFRSPTPSSRTIDQDPMMRIGLPSLTTFGFHGVKGYLEDLVARIDTPQLDYFRISYFNQLDLQVPQLSRFIVRTQSLYLARFKRARVDFGANNVYVSLYCEREELLESHFSLQISCQGLDWQVSHAAQTLSQSAALLSNVDDLSIDTRELTPGGKDYMDGTEWLDLLRPFTAVETLHVSGKLAGHVAYGLEGVSGDMVVEILPYLNSLSLEDEPLTSVERFVEVRRLSGRPVTIVNEFFERLESPSESERVPYSSALNFELRPAPPTAKVSRGSH	NA	NA	NA	No differential expression	Not secreted	NA	NA	NA	NA
Lactarius akahatsu	Lacaka1|MSTRG.3162	4579	379	MTSSLLEKMAAVKWKPFPALTHLWLSSNDGKVPTLPDEFLGLLAPSLQVIHLEGISFPALPRLLSSALGLVDLRLLDIPRDHYISPGVLVSSLAALTGLRTLLIGFRSPTPSSRTIDQDPMMRIGLPSLTTFGFHGVKGYLEDLVARIDTPQLDYFRISYFNQLDLQVPQLSRFIVRTQSLYLARFKRARVDFGANNVYVSLYCEREELLESHFSLQISCQGLDWQVSHAAQTLSQSAALLSNVDDLSIDTRELTPGGKDYMDGTEWLDLLRPFTAVETLHVSGKLAGHVAYGLEGVSGDMVVEILPYLNSLSLEDEPLTSVERFVEVRRLSGRPVTIVNEFFERLESPSESERVPYSSALNFELRPAPPTAKVSRGSH	NA	NA	NA	No differential expression	Not secreted	NA	NA	NA	NA
Lactarius akahatsu	Lacaka1|MSTRG.9693	10311	379	MSSRVPCRYRAYLTKGQVADLVAPHPETLELVNSWLEHHSISPSSISMTHGGNTLTLKRVSVTQANTLLGASYQLYRHVERGETIVRTVGYSLPRALHWHVLTVAPTTSFVSPRTQWQTPRNCSDGAVMSTSEEPAMMLSSRAKVNRIMPSFLRWLYETEAYTPNTRGENVLGVLGFLGYYPSQTDLTAFMQKFRSEAGDATYTVVLVNGGEYDPTHPQQEANVDLQYAEVMAYPTPHIFYSIGQGAPGMEDLFSWLEYILDQENIPQTISISYGIEERLMSREYAINVCDQFVMLGVRGVSVLVSSGNDGIGKGTCLRDDGTVRFNPRFPGTCTCGDFSQIGRSTRVRVQDAHRIATLLQAPMLPSSAERQATSRRSQ	XP_009548822.1	4.2e-72	serine protease S53 [Heterobasidion irregulare TC 32-1]	No differential expression	Not secreted	NA	NA	PF09286.12	Pro-kuma_activ
Lactarius akahatsu	Lacaka1|MSTRG.10319	2515	380	RYGKYLSDEQVAELVSPPPRTLEFVNSWLEYHGVPSSSVSMTHGGTTLTLSGVSIMQANALLGASYQLYRHVETNETVVRTVGYALPAALHRLVQTVVPTTCFSTPHTQWQSPRKRSGGATAGLKEPVSGEPVTVLSSRDDDWTTPSFLRSLYKTTEYRPAAADRNALGIFGMQDEYPSPDDLAKFMSVYRSDGTDATFIVVQVNAGKYDPTNPAGESNLDTQYAVAMTYPTQVFFYSVGQGRSGTDDWLASWFRYLRTASNIPRTISISYVVDERFIPVDYATYMCTQFSILSILGVSVLISTGDDGVGKGDCVTNDGSVRFISNFPATCTCGILSQLGSSTERVTHHTRSLCHSRRWNDGSRTRDRGRPLRGGLLERL	XP_007864796.1	1.4e-67	subtilisin-like protein [Gloeophyllum trabeum ATCC 11539]	No differential expression	Not secreted	NA	NA	PF09286.12	Pro-kuma_activ
Lactarius akahatsu	Lacaka1|MSTRG.8099	10895	380	MSALRVSTIQELRKVPIDKLVGFTPGPRAVDDGYFFKNASVENRAAEEVPQNHLHVPEKLTAQCVIEQHIVDTHGTHPSRIGAKVLQVLHRDNLALVHRPRVPAASQQPVIIGDCNFESFGYAPSASAWTPSAVVRRVGAICQSVKKANALLRAYDISAHTPDEEFPERLLELINDARFAWPTHLAAEKFRSARSQKDSGGVWRYVFDQEAPGSGIPHHATDLLYLFDTARPAFSAQLLLATPDPDTFFPDRFDVDDDDDDDVPFDNSAFDSAFDDGSSDGEPMPSVDQYQYGAVRDALQARWLAFAYGQAPWSRDKVFVFGPEGEAGERGMNIFESRRRTAAWRTALEPLGRALVQKVGLELSNGPSGAQLMHHQQHMS	PSS15396.1	5.3e-83	hypothetical protein PHLCEN_2v3272 [Phlebia centrifuga]	No differential expression	Not secreted	NA	NA	NA	NA
Lactarius akahatsu	Lacaka1|MSTRG.7920	1899	381	MSDHAKRTRSQLSLTDEVGDIHLGISPLKAARQERRKNIPVASPLVSSELHAPPNVGANQNDDGYLLSHHEDRPQKRTSPKPQEDDPERQFKRLKKDHIEGEWDDGAPHAHDLHPEESRVTEATRPSGPFDFSAISPKDLLSPTGSRQLGASWTKRAQSAPLVSPSAPNRNLGQLMPSPRKTASVSPVRETFRFSSLPRALGPFAGDTIVRNVGKPPTEPERDNGLTAPRIPASNDMGTSLREKLTPEADTSRPCDDQFPAAGPSLEVTASDVSLTGPLLPLDVRTCISNVSIIFIFVQFLTTPTTLPKGQDSDITPKATAPVPSSPPGGRLTPVPSSDPLSPLTDDPPSPLSALSSLSELEDQPVAQRLRDARFCRTSQS	XP_009553444.1	2.8e-07	hypothetical protein HETIRDRAFT_447153 [Heterobasidion irregulare TC 32-1]	No differential expression	Not secreted	NA	NA	NA	NA
Lactarius akahatsu	Lacaka1|MSTRG.9326	3849	381	MLLQGMLKTAEETALESPPDIDTRSFFWTFDSLDEDHELERFFSGLPGFRSSKVVDDPLPRFTGEQMDKLSKALTGLLDRTFSSDLLLESVKNGRAIICARALDPALFPSEYRQIMFSIMSGNQCRGLQTSKFGCIVRGWGNGGNQGTGLVTKAIVTSIIGTVERRDDLWFILASSVLGVLESVLRDYAANSLSLAILIHVVRQQFYHLQEPFWPYIQFRGALDAASKFDVQDTSPKLQHEFCSLWNQIVLKAQNDDDREIAFWILPPICNIYVSLHRDAVPPRTPGSTHPGIQCAMSLAIVMTTLPSSVITPRSSLPFPVPLRLPCPCLPHFVSSKASRMHNRSTTSTPLISHLSKASAFQYPHQIRPRLAQYRALSTRV	NA	NA	NA	No differential expression	Not secreted	NA	NA	NA	NA
Lactarius akahatsu	Lacaka1|MSTRG.11144	2982	382	SKAKPRFGFLSSAKSIVRSVWNFGAGSPTKAPQTTTTTTTAITKSQTSGIAVEPKKTVPGPAKKPSLPASRPSESLVGRKSTAPTRTVSTSNKAPITAGTTGTESSRSRPPSSTFDSRYNKNSLTNPRSASLSSNTAARSLNPTPAGSTSSRRSVLAGSANNASSLGTRGSVGLARSSATNSLSAGSQRRAAPGPTSNGPGATRTAAEGSNDADANIFSPSRATATSRLFAPTASSLAKTRSPAGTTTGAVAKSRTSSIVAQRAKTPPRNSALDAITNSPRGGSGNPNSAAAAAGGKIFSTPLLAVPPPVRPTSLAAAAAAVMAASGDGPLSPERASPAKPATGRTTARSETTYLALTHHRQARCSTCRRGCVVILVVRIAP	XP_001837769.1	3.7e-07	hypothetical protein CC1G_06975 [Coprinopsis cinerea okayama7#130]	No differential expression	Not secreted	NA	NA	NA	NA
Lactarius akahatsu	Lacaka1|MSTRG.2788	6049	382	MGSNEDNVNILAALEHPDRIRNIKLSLSRLSLGNMVVVMQRPFPALTHLWLHSKNGETLVIPDSFLGGRAPHLQEIYLDDISFPAAPTLLLSACDLVDIRLENIPDTGYIPPEAMATSLAALSRLKHLTFRFSFEDSWPGQRSQPPITRTVLPALTTFFFDGVVEYLEDFVAHIDAPQLNWLVIEYLNSTLHFDTPIPQLCGFIDRTEKFKLSQFRRANLELRTVTFVIELDGSQGRSSLKLSIPFTGGLTGLLSQICSTLSNVDSLFVNSVYLDELDDEIEWSDILPLFTAVKELRAWDYVSQRIGHELGRLVEMEETDEVLPALELLYLEDQPGTLVEEFVAARRKAGRPVTLVYEEGDVSEGNDVSEGSDVSEGSDISD	NA	NA	NA	No differential expression	Not secreted	NA	NA	NA	NA
Lactarius akahatsu	Lacaka1|MSTRG.9659	10831	382	MSSPQFAANGTAISPLPVKPDVDDLFATLFAPATPPASPFSLGSPSIFSPPPSARDHVTSISPASSTDSDFGAFVSVPPSDDPLAQPSSSTEPSSTSVVPPPRRLSATITDFFTEAKAATARNQQGFLVELLEHEDDPMYWHQRGASPLGSVVPSGATTPQPPPPAVDIGNSDILGPLAEPVKAVVESSVVGHLLDSLTEATSDNAFSPPPPPPPVEFVNVTTHRSASSSPPLLRSPSLPPSPSRPTPPVLTRTDSMTSTFSSSPQPSRWVSNFLTYRGPPPLPPLSVSPAPTVPQVRVGPKRADITHGSPFAPVPFVPASGAPGFDGDRTWNKGFDAKGKSADAVERRGVQLLGRKESTRAVLGTALANTVRAHFFFFHAN	EMD32723.1	9.6e-32	hypothetical protein CERSUDRAFT_108566 [Gelatoporia subvermispora B]	No differential expression	Not secreted	NA	NA	NA	NA
Lactarius akahatsu	Lacaka1|MSTRG.3310	6351	385	MYSVPPPRPLGPRTQLQRSQSGSSPAFSPSLSEISGHPAPVYPLPPAPSLARARSAATGTRPSLTLNVNSGSAVYLNPSVSGHAARSPEAAAGRPGPPAPAPILAHMAQSPSGGAHDEERTAMPITPRSISKIVSLNDLQQLVRRMETHRPPPPSPSQGGGSGAGCGEDGGWSDGVLKVVEYLGEGASGAVEAVQDTRTGRRLARKTIITHEGPLKQLARELAFLSGLRHMNIVRFYGAYMSPSNGEVKLVMELCEGRSLAGIGEQIRRRKGRVGEKVARVLAEGVRAFACLFFPVYVRLRLTSDSCGVTAAVVARSCRVSRTCTRKRSSTATSSHPISSSRDRASSSCAILACRASSSARARAPSQEQPSTWRCVCTSGPAAPS	XP_009547625.1	9.3e-35	MAPKK-like protein [Heterobasidion irregulare TC 32-1]	No differential expression	Not secreted	NA	NA	PF00069.26,PF07714.18	Pkinase,PK_Tyr_Ser-Thr
Lactarius akahatsu	Lacaka1|MSTRG.6585	9388	385	MRLLSLKFLQSPVAGSADGKRIASLVLASSNSTSATSDSPTTYSSEFVLNASETESTQMYLLPVSDSSTTQFTSMLASDEKGVTIRLAMFDRASASVSPFCATFDPNPPVPGPLTAEECAVDPVGEHRSQLFAFNQATGVVRPMWFDGQSDGTEPEEGDCSGNAPPTPLDASLVGATEASANNVTSSPSTTPTTIGNSTVLSADIPQASPSNSSGSGISGVQKVALVFVAADPEILDTPAVLANTTTSSVLATSTGVGASDNAISTANGSSTTMASSSPGSLAATSPIVLASASGPSSVSASTPPSTASNAAISASVSTGMSGSIPSSAAAASGSDSTPTTVLGVQVVPTTEGIAPSTSTTSMTPVMTPVSTQPYEWMFKPNSRS	XP_012181931.1	6.1e-26	predicted protein [Fibroporia radiculosa]	No differential expression	Not secreted	NA	NA	NA	NA
Lactarius akahatsu	Lacaka1|MSTRG.6942	3390	385	MTVAKVQRRDDSWFILASRELGIQEPVLRGYAAHGDSLSLAVLIHITRQQFSHFWEGPWPEEEFSEILEAASKFNVEDTSHDLQHEFCALWNQIVLKVQNDYSWRTARFILRPIRNVYIALHQVTDSVPVDGPLSYPFSYPVCNVASHHPDSSPHRPHTHNVSTSASAARVAVLVPAPVANPEASSLSVPAPPHVDESLADVPPIDDFYPQIADEMTTERLFIPSTSPDSVTVDAFVTSGRIIPRPISATSTSAPPLSSTPPSTAVPPAPSDPPNLPPSSNPVLDNIFPTGAPLSSHPPMTRSEHSPSCPESHRSSTITTAPRNPPRPTSAPDLDAAPEDNGSPKPGSHQENDALDPPSVNHAIHANTTALDLLPQSSSLSLVAH	NA	NA	NA	No differential expression	Not secreted	NA	NA	NA	NA
Lactarius akahatsu	Lacaka1|MSTRG.8695	1528	386	MQLLFDPAMPYFETWLELYDIDQGWDGFMDYDRQHGSPLYYASLCGFQDLAAHLIAKHPRYVNATLGRCSSPLVAALHKRHFDVAELLYRHGADVGIRGYENRTLLHAASVGGFVDIVQWLLDRCVDAHSQQDNHETPRHLPKANGHPGHCKSVDSVDDTNRTPLHLASLHGRFEIVQVLIEHGTDINAWDRSNNMPLHLASSSGSPETVQLLIEHVTDINARDKSNNTPLHLASSSGGPKTVKLLIGHGADVNARDGNDKTPLHLASFSWSPETVRVLIRHGADVNATDRYHKTPLHLASSSQCPEAVQVLIEHGADVNSRDGNDKTPLHLVSSSRSPETVRVLIEHGADVNLKDDSHKTPLHLASSSWRPETAQLLLEHDADVD	OCH94796.1	4.7e-10	hypothetical protein OBBRIDRAFT_746651, partial [Obba rivulosa]	No differential expression	Not secreted	NA	NA	PF12796.8,PF13637.7,PF13606.7,PF00023.31,PF13857.7	Ank_2,Ank_4,Ank_3,Ank,Ank_5
Lactarius akahatsu	Lacaka1|MSTRG.8774	4526	386	SRAYSLVQWKRCEHIKGRRTSPRRTGCLAVCAVVSPPMFYPHSYIYRIIIFCNKHALSPSVKAGGYGTGGWAINGDIVIDLSRIQDMDIEPPQSGGDGYTSLRDTAQSSDKGKARVGEPVLDLSGPATRKRVFEAEAEHAPSSDIPPAAWVNSTASAAVASFFHGPALPPDDSGEEPRRPAANRRRLGIDGSALTVFTHSLVAETLTARSDPISSSSGTHSSGHSARSGTSPSTHATTPASSRSTHSDSAISSAPPAPFTFADSFDMAPSRPDPFAYIDNIDPPMFGPSPPTPLASSAAAWGADAALLAHPLFAGDDFQSHLTRPAPPHTHAYVSFGAGARQKDVDLFTAAHPLDGGVVPYHVPLYMRLFFSIVVRQLTLICLCHG	XP_009553046.1	1.4e-46	hypothetical protein HETIRDRAFT_39939 [Heterobasidion irregulare TC 32-1]	No differential expression	Not secreted	NA	NA	NA	NA
Lactarius akahatsu	Lacaka1|MSTRG.4717	3568	387	MDHVPDVPSDFRRVPWLCHLHRWSTGCHLRVPCQQRRRACRTDSLCGWLRAWSVIPDFCPCLLTEIESGPMVWAPLSEVPQIGRMPIYIFTLAMFVVLQVPTALATNYGILMAFRFLTGFFGSPILATGGATIADIYAPKKRAYAMTIWGLFATCAPSLGPLVGGFAAHVEGWRWTIWEILWLSGPTLVLLFFFFPETSASNILYRRAKRLRKVTGNPSIKSASEIAAATMTPRDVAVDILVRPFALNFQEPIVLVLNVYIGLIYALLYIWFESFPIVFVGIYHWREQMLGLSFLGIFVGIFMVIPPFFAYLYFVQEPKYNEKGELKPEERMPIAIVGALIVPVCMLWFGWTSRESVHWIVPIIGSSLFGMAALLLFVSAVLLSMSS	KZV63993.1	7.2e-120	multidrug resistance protein-like protein [Peniophora sp. CONT]	No differential expression	Not secreted	NA	NA	PF07690.17	MFS_1
Lactarius akahatsu	Lacaka1|MSTRG.7916	5597	388	MPGQITRVYPASGANAMLPLTPANNYTPTIIFCGGQHLEDEQWGNYAYPFIDTWTIPASADCQRITPEPQDGSTPVYIQDDDLPVGRTMGQFVALPDGTLLVLNGGQYGTAGYAQRTQTTTTLGAMPYGESLATGPVGQPAIYNPNAPAGSRWSTAGLGSSSIPRLYHSSALLLPDGSVMIAGSNPNVDVNLTTIYPTTYTAEYFYPPYFSASTRPVPQNIPTTLSYGGNSFDITVPSASYSGAGNAAATNTSVWLIRQGFTTHAMNMGQRIMQLNNTFTVHDDGTITLHTAQLPPLPALFQPGPAFLFVTINGIPSNGTYVIVGNGKVGPQSTAPASVLPPSVLSAAQSNGSSNGTNNGTGNNNAALNHSGNIIVQLLAAAVAFALS	KIK37527.1	3.2e-144	copper radical oxidase [Suillus luteus UH-Slu-Lm8-n1]	No differential expression	Not secreted	NA	NA	PF09118.12	DUF1929
Lactarius akahatsu	Lacaka1|MSTRG.5185	1633	389	MFPSLRLGLVALLRGIKSIGYTLKSFVLRCLLFRPHILRSFRRIWSLCSGTSPKDVSKKKGGNARPSFPGASGGCEGYTPIWASRVSGRPHSQLGPGSAENVLLSPMTAQSQSAPHSPASMHAPSLHGSPQLSNRQLSASSASIAGSHNAESRPPSIRYLDAPLTSTHSRVTSTQFGPPSSGRQSRSRSRSRHPHRSSTPGTRTASPVESRTPSLRSYPDPQLQPLPRSSSPGSTQTPHAEPTLQDTSGGYHQLGLEITFSPPSRSQTADSQSPFDFPQPPLPLQPGHLSGLSHIPTPSAEHSTPNPLDLGGSGSLYLMPVPGGALLGSGSLPPTPSSNQVPSLRFHSQVSFRNTLTTDASGNWSDKKERVLRPMHSEQVSRYVNKNDV	NA	NA	NA	No differential expression	Not secreted	NA	NA	NA	NA
Lactarius akahatsu	Lacaka1|MSTRG.6701	5736	389	MSAFGGSLFGNPGTTQQQPGQSGGLFGGLSSGTNTGTSTGAMGTQQPSLFGGTQPGTTQGQGAGTGLFGGANTGTQQTGGGGLFVSNTTPAGTQNPGQTGGALFGGGTVQNQPPQASGGLFGSTTQQNQPQAGAGLFGAGNSTQPPTGGGLFGNTTGGTSGAQPAAGGLFGAGNVANQGASGTGGTGLFGGQQQQPTAPGGLFGNTGASTATQPTGGLFNTTQQPAAGGGLFGGSTATQQQPATGGLFAAQQQQQPAPNGGLFGSTTTQQQPMAGGGLFGSSAGQQGQQSGSATLFGSSTTPGASLFGTTDTGTTGAGGASFLVGGQMSQPPTSGLLGGSLFQTRISSVAPQNQTDALTQFGQLQQRIEAIIGAWNPSSPLNRFQVRSI	NA	NA	NA	No differential expression	Not secreted	NA	NA	PF13634.7	Nucleoporin_FG
Lactarius akahatsu	Lacaka1|MSTRG.5122	2630	390	ADVNALSENHLTPLHSASYYGKPEIVQLLLDHGAEANAESDNGENPLHAVSCGEYESQEVGVRVAQLLLERGVDVNTRRKDNCTPLHLASFCGKFDIVRLLLDHGAEANAESDKGDNPLHAAICGKYETREDGVRVAQLLLERGLDINIRYKDNSTPLHLASYCGRTEIVRFLLDHGAESNAETDNGENPLRAVTYGRHQTQEDGVRVARLLLERGVDVNTRRNDHCTPLLLASYYGKLEIVRLFLDHGAEANAEADNGENPLHKVSRGKYESREDGVRVAQLLLERGMDVNARRMDHRTPLHIASYYGKLEIARLLLEYGAEANAKDAKGRTPLYLVSHGGYESQKDGVYIAQLLLGRGGDVNANYDDHWTPLHVASYYGKTRDRTISS	WP_119323420.1	2.9e-15	ankyrin repeat domain-containing protein [Capsulimonas corticalis]	No differential expression	Not secreted	NA	NA	PF00023.31,PF12796.8,PF13857.7,PF13637.7,PF13606.7	Ank,Ank_2,Ank_5,Ank_4,Ank_3
Lactarius akahatsu	Lacaka1|MSTRG.7912	4675	390	MRLGRICSPSCLGELLRKRSSFGSLIKVCRRPESSTFQLRLLGFRDGAPHPLASRSYIDIELPTKETHYIGLKTRISTIGSYIIIAVGLGPEVNGADVILLVDWQKGHLTTVSPSGAILKIADLSPKLRTTPTRAYLTDFIVVSNDVLALVQGPGNALELCRLTSGPTPSLQTICLLELPPLLPYVRLVAASSKTEHHTSAIDIHRQTRPPPRHLFSPSQDDTLVILALSARISGSAFVGMKTYTLATQASTLLSYAECRSQDSSGLVVPWDAWGPPSSRCFDGHSGKSTAAVAGQRWIAQGAIRDFCPRRVRASSNGITQRSKMPADRVFARDVESALPYHEVSLAGNEGALVHDALLDSERIMFLVPEVNDPQTPSSPLLIIISAAWS	XP_009547753.1	1.3e-12	hypothetical protein HETIRDRAFT_321331 [Heterobasidion irregulare TC 32-1]	No differential expression	Not secreted	NA	NA	NA	NA
Lactarius akahatsu	Lacaka1|MSTRG.9568	13444	390	MRRIASVLTSRRSDKPDPPNDAHPRPTSKSFANSSTRRFFGTLTRITVSTDRSSQPTASEPAHSSSASSTGSVSLRTPEDDRMGQLTPHVARSSSQRKAWIPWLTPKKSDPRGQSPSHPPSSYWPDSSGPIPPSSIAVNNQPTESEDDTSDESSSSESESTSTSPPVPSRVDKPDPHLSPVDFVASLTMNNIPPAFSPPPLLHYSDAPLFPRSSNSVHRLTFCDTIESIMHRKRLLHRLQSLTPADRRLLAALGPRISSAAQRRTLPQPEEGERYDLKHVQPFSLGLKQWISRPYFEERTVLWVPDDAGTVVWTTVKGSGFGVWALDVSETLELLAGLDNFNIDDVRPSSPLPPPSNNVPPALSKCIHTFIYWKFVIKTHSQSFPAPCHG	XP_009543713.1	3.3e-56	hypothetical protein HETIRDRAFT_415717 [Heterobasidion irregulare TC 32-1]	No differential expression	Not secreted	NA	NA	NA	NA
Lactarius akahatsu	Lacaka1|MSTRG.8447	4783	391	MPRGPRRTRRYSERRTGTCPWLLSVVFLLKDSLTVDRDRRSSYRSSRRFVKGLVIPLDPPPPKQSTDDADYIPEMTASWFSLLTFGWMNSLMALGYARPLEASDLWKLQEHRSSEVIANVILDSFEARRKNADEYNTRLSNGEIKPPLKLRLMSALRGDGEERLRQWVEKDGRKQPSLSLAINDSVKWWFWSGGILMVAGDTAQVTSPLILKVKPLHPLVYISSSDYPFTVPYRICDRFLHRASRKITGSRRWSRNCPCIWPRHSATVQFALSESFFLPLNLIWRPCPRRPHHCHLFTLSTYDHRLSGKVVQWQISQSHLDRRFTNRLLLRILPHVLDGTDPIGDLSWSTGFQSWPECSGRLCRLRRSRPNTGQDYEVFLQYSTKDDGMDG	KZV72596.1	7.7e-53	ABC transporter [Peniophora sp. CONT]	No differential expression	Not secreted	NA	NA	NA	NA
Lactarius akahatsu	Lacaka1|MSTRG.3662	5887	392	MEYGQYDWDTIAPNDEDNVIAALEHPDRVCRVRLHITTSQLRRITAAMQEPFPVLTRLSISSEDVYVPIIPSGFLAGSAPCLREIEFTSIPFPALPTFLLSASDLVELKLHQIPMIGYISPEVMVAHLAAFPRLKTLDIGFLTPSPLPDRTLPPLTRTVLPALNYFAGVCDYMEDFVALIDAPQLRSIEIYYLDPIVFGVPRLSEFINRSENLKRTLSRHCQVMLDDIDDTINCYIGATSDKVQHREPETGIYVYFLCHGTDRKFLNLTRTLSCISPVLDIIHFAINSETVEPPSSPEDVDYFEWLRLLHLFSSVQTLFVAAIFAGHVSHELEDIAGDPVAEFLPSLDLLCLEDQSISSVDEFVAVRRDSGRPVTIVNTKEEFEKRLEAYPP	NA	NA	NA	No differential expression	Not secreted	NA	NA	NA	NA
Lactarius akahatsu	Lacaka1|MSTRG.5855	6093	394	MSVSFRHNAQILCTTHTYSRRISPDDYMAQHARSSSARVYIVTLANPFDVRCTIPSPPFPLLMWRRSYQPLPQDKSEDLNDAERRDPSTVSILFGSPPVYGILIVPTQSSQATSLKHFYISDSSSSRSARFSTASSFFPWATATLGPSGTLLTPQSWKPRALTSISTCCTATEPKRIIGSLRSTAYHVRSHKYPPQNPTRSIRSGRCRSWRHTAPFRTTTVVCSSSPRWGRARYRGVPLTRKAQISTFVQFRALDYGMENCSLALRIPEYGSDAMEIARIGSTIDVWSLAVHSKVDLQTLSHRTLPRRVAKVGSFTPRYDTTEQLPGFACESGTYHAFLLACPQGARKEDCWVDVTSTKEKPIGACMIPPLISASIRGLTATTPGLYLVQHQTI	PAV21724.1	4.4e-16	hypothetical protein PNOK_0168100 [Pyrrhoderma noxium]	No differential expression	Not secreted	NA	NA	NA	NA
Lactarius akahatsu	Lacaka1|MSTRG.5498	2200	395	MDYRYSRRHLTLDDEDDAIAALGHPDRICYLGLDITNPQLGKLAMVMQQPFPMLTHLHVVSKDGNAPVLSDEFIGKTAPCLQEVDFHGIPFPTLPSLLLSTSHLVKLRLYNIPPTGYISPEVMVACLAGLPSLQKFIIGFQLATRPDRLHPPPITRTVLPALTSFEFKGANEYVEDLVSRIDGPHLGRLYIHYLNQIVDLQVAQLSKFIDRSVGPEITQYKHAQVGFISGWATFTMYRSANQQSSDPRHSATTVISCKGIDWQVFHVAQMLSHFSAILSNIVHLDLEAQLEEDHPEGRDDVEWLHFLRQFSTVKVLRVSYEIAKYVALALEDITVETVAGALPSLDSIYLEGQPASSVEKFVAVRQLYGRPVTVIETETEFDVKLGSFYVDENAP	NA	NA	NA	No differential expression	Not secreted	NA	NA	NA	NA
Lactarius akahatsu	Lacaka1|MSTRG.3661	7416	396	MKYGQYDWDTIAPNDEDNVIAALGHPDRVCRVRLHMTRSQLGRITAVMQEPFPVLTRLSISSDGANVPVIPSGFLGGSARCLQEFRLSGIPFSALPTLLLSASDLVELRLCDIPKIGYISPEVMVAHLATLPKLRTLHIAFLSPDSRPDRTPLPPTTRTVLPALNYFASVCEYMEDFVARIDAPHLRSIEIYSLDPVVFDFGVPQLSEFLSRSENLKRTLSRHCQIMVDDIDDTVDCCIGATSDGVERREPKTGIYVYPLCDGTDWKFLHLTRMLSQMSPVLSDIIHFAINSETFEPSSSREDLDYLEWLRLLRPFSSVQTLFVAAIFAGHVSRVLEDIPMALDTDFLPALDLLCLEDQPISSVDEFVTVRRDSGHPVTIINAKKEFEKRFEAYPP	NA	NA	NA	No differential expression	Not secreted	NA	NA	NA	NA
Lactarius akahatsu	Lacaka1|MSTRG.10047	7404	397	MGGSKVRDYGPPFDDADADTILRSADDLDFRVYRVILSKASPVFRDMFTFPHPGPCSKYTIDDDDDHKDGLPLVRLPESSMALSMLLYAIYPVSPPHAPPPYAAQGRGQDDGTLDTLTEAWLAADKYEVSGLRDALTARLQTHALMARQPLRMFGVAYYLRSQTLLQSAAARTLPLAPLTLDALGRHVDLVPFIAVRHLVEYHRACGEAARDFALLKADEDGFAEVFLPALLVQGTSAAGRGGAGAGGTRAARVCKDSRCQFGNLRVPWPRSETLEWWRRYMEALSVKLGERPAMSATAAMGACVDEWESLGSKLCARCRGSAASALVLAHTSLEEMLKAEIEEEVSTLYLLLRDQRTQPNVLLPGRSNLSTTSVIWNLPCFRGDDSSGSPHLYSKV	XP_007309262.1	1e-23	hypothetical protein STEHIDRAFT_114876 [Stereum hirsutum FP-91666 SS1]	No differential expression	Not secreted	NA	NA	NA	NA
Lactarius akahatsu	Lacaka1|MSTRG.9364	16369	401	MSMQGRHHEQELPPGMPLRPPSAPPPYTYPPTSPNGPGAHTDSHRPSSPLHFATVVHPRVPGPSKSPRRPLPPLPEFRGVGGSVANLPLASGSRPSLRVSTSSSSSLLKPSSSSAPLPSSPPLVTPVSPPGPSSSSSSRPPRHRSLIPLFSLLRPSRQRFPTKQIAEREAQAPATDARLEAEEAKRAVELEAVKRAATEEHARLAATQSNAKEAIRSNVRSLLLRHLPSDEDYDPIFKKCAEICESGGLNLSEVLQEPLIDGKPPVYWAILNGPSTSLQGSDAAFDTLVVALLGACQPLKETTITSVRLACMLTSNNVLLQHLFRRFPALSPLTPGDAILLSSAGGGDVADVDEKQDGSGTFVARIQVRRFRLRMRVSKLIRVEFVTSGRLPHLRFHSS…	XP_007366509.1	3.1e-25	uncharacterized protein DICSQDRAFT_137219 [Dichomitus squalens LYAD-421 SS1]	No differential expression	Not secreted	NA	NA	NA	NA
Lactarius akahatsu	Lacaka1|MSTRG.2942	3485	402	MGTGIRTSRAYKSRRSTALVHQSPAVLLRRFSTFFSLLVLLSIMLSRFSALLVYVIAGLVISAAAVPMGPQPDYYDEPKSRHPGKYYPHSYSPHHKYSQDRPYSKPYDHKYRAYALGEDKPYPNPEENKQYPEANQPYPASEEKKYPEEKPYPKSSPEDVKYSEKPQPYPEDKKYPDPSSDMGKDPKSDEYKDPKSNDKDPKSDDNKAKDFKSDENKDHKSDDDKAKDVKPDDNKDHKSDDDKAKDVKSDDNKDHKSDDDKAKDVKLNDNKDYKSDDNQDHKSDNGQDHKSDNDKGQDFKSDVNNDHKPDDNKDHKSDNDKGKDYVPNDAKDHKSEGDKDRKADYDGKDHKSYDNKDYKPYDDKDHKSYDKSGGNPTDVFKNTLSTTGLLPDVASVAPN…	NA	NA	NA	No differential expression	Not secreted	NA	NA	NA	NA
Lactarius akahatsu	Lacaka1|MSTRG.3126	5082	405	MRLALKKQVRLRWMVELLPTLLHISVFLFLVGFVAYLSTFNHSVAKWAGACAGTCALLYMYISLVPIISRDSPYYTPLTTLVWAISMGIASVFLRLRHFVASRSSHLGDTVRIQESFQLYYQRVVKGVAKDVEKLADTQSSDLATFVLLSTFDSLDGDGDMEQFLSRIPGLYASARVHLDGNAFARFNSDILPSSIMSFMDHVLSSNLPDSAKQNCVAICSRAINANLLLLQSTFRQILQTLNSDIFNRADFVRLALEHLRRDDQDSDPWVKDYAQCIVAVAMNRTHLEDGAWIDMAWHYLKPHHAQYRWEAHNLRLCNLIYITRQLKDSRLENSDQFEIGGDWYIALVEARKLEVRGTALGLRLEFRALWNELVGVAHDWQASETTRQNAHKVLYLLY…	KZP20866.1	1.3e-07	hypothetical protein FIBSPDRAFT_954296 [Fibularhizoctonia sp. CBS 109695]	No differential expression	Not secreted	NA	NA	NA	NA
Lactarius akahatsu	Lacaka1|MSTRG.8431	10382	406	MLKTPSLLRAVLTQVHELTYDTSSGAPEYGTNTSGAGKKVIIEYSSPNIAKSFHVGHLRSTIIGAFLSNLYKACGWDVVSMNYLGDWGTQVCSDLFSASLLTNRDQFGLIAVGFEKYGSDEELQKDAIKHLFDVYVNINKDAESDPGVKTAAAAWFKRMEEGDEDALKNWRVWRELSVKKYAEEYDRLNVHFDVYTGESKVGKKWQDHALERLNEMGLISDVEGAKLVDLEKWKLGKAVLRKKGPHVSLSPLRVCSQRCVPDGTSIYLTRDIGGAIERYEQHKFDKMIYVISSQQDLHTSQFIKVLNLMQFPWAQSIEHVNYGLVLGMSTRKGTVVFLEQIIREAASVMHDQMKKNQEKYAAVEDPEQTSLEVGLAAIKIQDMAAKRYVCSHHPSQALF…	XP_009549739.1	2.9e-164	hypothetical protein HETIRDRAFT_326259 [Heterobasidion irregulare TC 32-1]	No differential expression	Not secreted	NA	NA	PF00750.20	tRNA-synt_1d
Lactarius akahatsu	Lacaka1|MSTRG.244	2967	407	MGLATVFSKVKSGYPIELLPPAAPLYFAAHSRFHGLLERLVVKYPQQVNACGGEHGTPLHVSVLMGHINVAQLLFAYGADINSCSADERTPLHIASQVGNLEIGRWLLNHGADVNPEDDDGSTPLHLAASNGHLEVSRMLLEHNAEVDALDDCGNTPFLNASASGNADIVQLFLDHSADAHVRDNRGNNALHLATTFGRLEVVRILLPLNVEVNARNDIGSTPLLKASACGIVRLLLDHNAEAGVRNNSGDNPPHNAARGDHFEVVQMLLERNVEVNAHNDEGSTALLQALQSLILEYSPSQRPPKVAELLLDHGADAHVRDNDGNTPLHIAASRGYLKVARILLECNVEVNTRDDSGSTPLLKASASGHHDVVQLLLDNGADADVRDNNGNTALHLAA…	NA	NA	NA	No differential expression	Not secreted	NA	NA	PF12796.8,PF13637.7,PF13857.7,PF13606.7,PF00023.31	Ank_2,Ank_4,Ank_5,Ank_3,Ank
Lactarius akahatsu	Lacaka1|MSTRG.10039	2241	408	MVLRLFDLLDGSNYAPYAVDAIRSILRLPHISFGSDVGKSQLLHHLRFSIDYLRRAHLLDQAGKPINLFGIAAHLYYTEPGNLATTALLQSGVIHGICSQPDTIQAERDFVVLLCHIFGRKYLPQVYASASNVRDLIQKGPSRVVLPPLHPEARAFLIGHQKETLGIFSAYALAFSSQHANELGPDDRLPLSGITFGPSDISTCPRTALFAHLSQTTVRPKARSLFVATSGHGDAFGGVGELVRTVRRGVHLNEHSIPTVESILDPELPLNAYLYDFFVHGQVDALVNMNGIRRGDVWYDLEAFQLVLVTIRGDLENLLLKTSRDSVRAAERDDDTVDAGDSGYHSLDPTGRGEEEEAGGSDGEGGEADRDPAAFTRPRGVPDRDWRVYEIVNKITNEF…	XP_009553242.1	3.7e-122	hypothetical protein HETIRDRAFT_461440 [Heterobasidion irregulare TC 32-1]	No differential expression	Not secreted	NA	NA	NA	NA
Lactarius akahatsu	Lacaka1|MSTRG.10333	10970	408	MLRRAFTWHRFYLAHPPWQPSPDLPSLTVRSFSTSLVLFEDEPRPDSPPLASSATDRVRQEKAAFGDKTMIQSSRSPDGVRTRARSLRPLLIPPTFPHSIIPEIPISDPQSSRIQEEEGGTDSSATITLESLPPNTFKADIRPIFQRFGEVRRIVMGLGGTRADIIFADAQGVKRTLHAYAEQPFFVRGREVVVLRKRACEPSNGVRAVNDDQVDANTAWQADPSRARTDQGDGRGAIFVSQFPLGTTQDDLWEALSRFGKYDKFVMRMYNNASLAWLLSGLDTLGPGSRYAYFMYSSADRVEQILRSHTRIPITIRGESLRIERTVNRPYTLSPGSSDIALELGKPLDPAESQAIIEELKQTVPRWRGSYEPSRVLWIGRLPSSFGREALSNFWSRLG…	NA	NA	NA	No differential expression	Not secreted	NA	NA	PF00076.23	RRM_1
Lactarius akahatsu	Lacaka1|MSTRG.1763	4218	408	MQEPFPVLTRLYIFSRDGYVPVLPTKFLGGSASCLKAIALFGIPFPELPVLLLSTSDLVTLNLRNIPPTGYISPEAMAVALAALPGLETLIIEFQSATPRPDRTCPPPVTRTVLLALNFFHFRGASEYLEDLITRIDSPQLNWIYIYYLNQLVDFQVAQLSKFVDRSVGLKSTTFKHARVTFFRDQVTLTRVPDRSNSDSRPTTIGISCQGIDWQVLHLAQVLSHFSTTPKVVHLELEAQWHPEGDRQLEGADGVEWLHLLHQFSNVQTLHVSRNIAGHVALALEDMVTAVLPSLDSIYLVDQPASSIEKFIAFRRKSGRPVAVGDTSDRFRCRCCNATYSHPQDYRRHLVQIHTPPRRCLFCPYEWRRYYEVKVHLTENHRDEFPQEVLNEIGAKGLV…	NA	NA	NA	No differential expression	Not secreted	NA	NA	NA	NA
Lactarius akahatsu	Lacaka1|MSTRG.6060	2402	412	MRMRQLGKGHSVMFFAPPEVDRSIRGLIPSGEASGSSGSQIRVLDVLRWAMHETCEDISRHLPHWVQQGLDHHKRFTAYKQYSSTGNKGALRDAWMQAESRTLEQTYDPILRARGAGAILEINNIPALRERIERLAVIKSVDVRIAEEQEREVNHEMEIERQVEQPVKVRPAQDVIYEDIRTFVKTGKAPSLSGHIYSLFVPTGVDKILGLAARWSPSPLATAGFVTTTTNSVGTNLTDYLRPVNWILSSGSGKYSTVIVISSHEANELLPVIRKSKEVRLHIYAPRVAASMRSFSDLTFYSIPESAADTWTAPAHVRTLLNLFAGQLYFDSREEYERVCVLLGLHMAHPGAAQIEVDGFVLPAHRTGEDSPFTTSAISTFKQLTGLRRKGMGYGETDL…	XP_009551790.1	7.5e-83	hypothetical protein HETIRDRAFT_156836 [Heterobasidion irregulare TC 32-1]	No differential expression	Not secreted	NA	NA	NA	NA
Lactarius akahatsu	Lacaka1|MSTRG.4744	3528	413	MHATSHIIAHDASPANTALYRRGLDKVVGTNDGANKLIGRDGDDTGVPLFELNGHEQVTGVPPSKVNSRDEDTSAPPSVLNGRDQLTGVPPSQVNGRDEDTSVPPSQVNGRDQLTGVPPSQVDSRDEDTSVPPSELNGRDQLTGVPPSQVNSRGEDTSVPPSELNGRDQLTGVPPSQVDSRGEDTSVPPSELNGRDQLTGVPPSQVNSRDEDTSVPPSELNGRDQLTGVPPSQVNSRDEDTSVPPSELNGRDQLTGVPPSQVDSRDEDTSVPPSQVNGRDQLTGVPPSQVDSRGEDTSVPPSELNGRDQLTGVPPSQVNSRDEDTSVPPSELNGRDQLTGVPPSQVNSRDEDTSVPPSQVNGRDQLTGVPPSQVNSRGEDTSVPPSELNGRDDDTGLPP…	NA	NA	NA	No differential expression	Not secreted	NA	I08	PF07351.14	DUF1480
Lactarius akahatsu	Lacaka1|MSTRG.4889	6595	414	MHILCTNGTPIVDTLDHLPPVPLFVDYQYEAATPSRKDELGIHHALRLRDRVRRIVLQFPPSAMHQFLMLMDGPFPILERLSLSFPADKMTGLILPNTFLAPNLRHLTLIGVGLPKGLSSLSSTAFLVTLSLTNIRASGYFLPSQLVARLQFLPQLEGLSIGFSIPIPRPAAERELLGKRRTPLTLPKLKNLTFQCVSAYLERFVSQIKAPLLERLDITLFGQIAFALPHLSHFTNMTKRLELPKAEVCFGRDEVSIVLDHHVSRRYGRNGYFILRVMCKNLDWQIDCAAQVCGALMPMLSGVEKLTLNFHKEMMPTKWQNGEIDGTTWHELLRSFIGVKELHICGALSEELSRALEVGEIGSDPGLLPNLQDLVSQFTGVRANNVFGSFVHTRQVADR…	NA	NA	NA	No differential expression	Not secreted	NA	NA	NA	NA
Lactarius akahatsu	Lacaka1|MSTRG.5110	11319	414	MHILCTNGTPIVDTLDHLPPVPLFVDYQYEAATPSRKDELGIHHALRLRDRVRRIVLQFPPSAMHQFLMLMDGPFPILERLSLSFPADKMTGLILPNTFLAPNLRHLTLIGVGLPKGLSSLSSTAFLVTLSLTNIRASGYFLPSQLVARLQFLPQLEGLSIGFSIPIPRPAAERELLGKRRTPLTLPKLKNLTFQCVSAYLERFVSQIKAPLLERLDITLFGQIAFALPHLSHFTNMTKRLELPKAEVCFGRDEVSIVLDHHVSRRYGRNGYFILRVMCKNLDWQIDCAAQVCGALMPMLSGVEKLTLNFHKEMMPTKWQNGEIDGTTWHELLRSFIGVKELHICGALSEELSRALEVGEIGSDPGLLPNLQDLVSQFTGVRANNVFGSFVHTRQVADR…	NA	NA	NA	No differential expression	Not secreted	NA	NA	NA	NA
Lactarius akahatsu	Lacaka1|MSTRG.5943	5446	414	MVGPSLAQSEFDNSLLRVGRGLLAAARDNPILGTNKPPEVVLRLTRIDPDAPDECENDSRIALTVELLRKMGLSIKLGERGPISQLTDLAPALPPPPTLVPTHRINLDLSILVALVSDLSHAPLPDTVDAAYTRFIPSAEYVEWKRSRLRAKNGGSSDSIMNTIEDDVYGPNQHSRALSEQLLQEMRKGILQEIYERLLVYPGETTNGDAPLRVEFWTTPEARDRCLRIVAKIGGAAEKRRAHALFLADTDDTSVSLNEREAQYWAQSRYPRAFLPLLPIRVFSAPEPTSSIDTPPPHAGFFSALEATCRALLASGSAPTPPEEAGDGELQRAAVVRTNGRLTVHTVQSMLCGAVRGWTTLTANKASVKAVLREVRARGYGAEARGEGRLAALWIVDPR…	PIL29015.1	5.2e-100	hypothetical protein GSI_09063 [Ganoderma sinense ZZ0214-1]	No differential expression	Not secreted	NA	NA	NA	NA
Lactarius akahatsu	Lacaka1|MSTRG.6285	5319	415	MANRDHAHRLLQCLIAAVRPLRVEELAEILALDFEAEGAAPTLKEDWRWEDRQRAVLSTCSSLITEVDDGDSLVIQFSHFSVKEFLTSDRLATSKGDASYFHIIPELAHTTLAQACLGTFLQLDGNADGNSVDDGFPLARYASQHWLEHAQFGNVSSRIEDGMRRLFDSTKPHFAAWLDVVQHFGAPHGSPLYYASLYGFRDLVAHIIVEHPEQVNAMGRNKRSPLGAALRKRHFKVAELLHQHGAAVDVTGDFRNRTPLFAASRDGFIDVTRWLLDHDADPNLQQGNRWTPILAAVAYKRLEVVRLLLDRGANAEAKMKDGMTPLHLASFKGSTETVRLLLDHGTNAHAEDNNGWTPLHHASSKGDTETVRLLLDRGASADAKDKEGRTPLQVALGET…	OCH94796.1	6.5e-50	hypothetical protein OBBRIDRAFT_746651, partial [Obba rivulosa]	No differential expression	Not secreted	NA	NA	PF12796.8,PF13637.7,PF13857.7,PF13606.7,PF00023.31	Ank_2,Ank_4,Ank_5,Ank_3,Ank
Lactarius akahatsu	Lacaka1|MSTRG.9709	3891	418	LSSAPSRPAFHDFAIPPSRQLAWKLLFCPIGVTLIKGFLFSATVLPLPIISAMDFPTNLSSPARAPAFEARPNLQGGQDLSLERLLDEADGNSNTQHAAGGMCSSPFAFTYSPSVPSTSLDQLRALLITYLSTDVNAGRGFGLPNTGSPFNTSSQTSELSSSSSSCDSGFPSPSPRLIASLSPPPSSITSPSDDLLLSFTSPGLSFHGLSIDDQDPAVPLQAGQYPLDLSFSPNGESYSTPPEQPLFQPVALPEEPFISDVPIMDQCVGIDDIGAFPGSNSFLTAPSFSVTTALGLYYPSTPQNFHIPPLSIQVDSSILSTLPTPAPPAETRKVRAVVPPAKIPRVRSGKMRKPSYVVAAASISGTDEDGVLKCPVCGFPQSTQRKGDFQRHLRTHQDA…	NA	NA	NA	No differential expression	Not secreted	NA	NA	NA	NA
Lactarius akahatsu	Lacaka1|MSTRG.6474	4734	419	MDGFNPFIMKEAGKKVSVCAIYMVLLNLPVDIRYQVENMFLVGIIPGPAEPSLEQINHILEPLVDDLLQFWDPGVFIKQTAHYTGGRLCFLALIPLVCDLPAARQMSGTASHTATHFCSFCKLPLHEIDNLDVDSWSMRTYEEHKRSASAWKAAQSSEDRSKLYRQNGVRWSELLRLPYWDPTTFVVLDCMHSLLLGDLKRHCREIWGMDSLLDEDVYHMVSDGKKFFVTEDELQHGNRVLKHGTDKDVAALSFYVIRKLCRETKKIRYSRKRKEQLVEALLKHVSSTIVSCPSVYFELINASKRTKHGRPSPQDAEQTSVGIVASHTSSTDTSVNVSKPRRNELATGKELQDGRDKYTSATSFSKIQALRKGLMIALLLDLDSPSPNSEHELWAKNKQ…	PIL32244.1	1e-74	hypothetical protein GSI_05489 [Ganoderma sinense ZZ0214-1]	No differential expression	Not secreted	NA	NA	PF02992.15	Transposase_21
Lactarius akahatsu	Lacaka1|MSTRG.6672	2819	419	SMIAIRPFETARESVLPLWSQTAQARRSAPDARAPELFVLLHGMLFTNIQLDDFSSTLARLVERLRIEEPEGREWAMMAAVNIGALLEYGRPQGFLRRSGVLGQDRNPAAIAAATKVKLAKKAQTDERMEVDGEERRRSSDVDASNPQGLSAIQISPALSDAMSSLEPSPSFKMAQDLTFGMLAHALRSTRDVPNPYVTILLMFLQTILRHPEGLSALERAIPWTDLAAFLTRAPHVQSAHLQNDKLDKNSVLLEDWAMRGMAWVGRVFERGCWEGNDSRLMEMEMLDTCDAESVDGTWEDDDDNEKASRATRATLAWRRTVWASTRIAKIVPGFVWDGKRSWWVDGMLAEKARVWEEEDRQAREEEERRKLGRRWVDVEGDELMDVEDDTTDTLSESG…	XP_007300640.1	2.7e-88	hypothetical protein STEHIDRAFT_75284 [Stereum hirsutum FP-91666 SS1]	No differential expression	Not secreted	NA	NA	NA	NA
Lactarius akahatsu	Lacaka1|MSTRG.6807	9571	420	MATVAARKKKSASGKGRPVSNSAISQPALENSSSVDTLSAFSSSGDLFAFVSLAVDKHRLRVYDTTTGTSVSEYIVDCARVTALSWALFQNPKSLSEDHEPEESAPRKKRKKRDAPALPPHAEPAPIPVIVLGLSTGSVVLFSPSHARVIRTLSHPSSTSPILSLDAYTRVADAALILLTSSTACFVLTWNAQTGELLSTNKTDERSPGTSLTLLPTVEPDCPSFLLAHHSIRMLSTSSDPLLTSPQKLTEESRFIGHASNVTMLRWQPSEPEGQSPQRFASIAEADRYVQLWEVPHVIGSEGKLVASAPLDSDARHISFSKSPTHPRLLVLSASGRISIFTPTSNLAGAPTPKKTKEKVATLSPRSSATISFRRGGTRSANVVNATFEQEGRIRVARL…	XP_009541567.1	3.4e-83	hypothetical protein HETIRDRAFT_469912 [Heterobasidion irregulare TC 32-1]	No differential expression	Not secreted	NA	NA	NA	NA
Lactarius akahatsu	Lacaka1|MSTRG.7913	7886	420	MGSRSGTVRLTCRFWPYQLTWPYLVNFPETHDKIELIGGTFKLNRVRSADEHASLVRVLRISVYFLLSLLLEQFFLSNSAIELHYPEPPPTPISPHPPSIVHRNSSSEVQIEARQRKRDIFRHGLWSLLHRRLPRAVTINSSEPRDASLDLSPREQDTPARTSFDTSLGPTQPRQRRFSIFGESHTSPPPPEPTQTPHDRPFQTALQRVEEAKALLSTSPGLVISPPQLLVHLAESEKANPTRRLTGDERSGLTSILGWEGKKAALRGSMTGTVGFLRQQQLSLLYSEYVYDPDRASQSSMDGSTIKSVDAELKPHTHSGTRVRWVTYMYYGGGDCDQCLGDVITSICSRAEEPCPQPACKVLQGWHERRWTHGGICVTAKTEPQVPFASPDVRSQEIE…	XP_007305813.1	2.6e-70	hypothetical protein STEHIDRAFT_81596 [Stereum hirsutum FP-91666 SS1]	No differential expression	Not secreted	NA	NA	NA	NA
Lactarius akahatsu	Lacaka1|MSTRG.2680	2327	422	MESGPVSRYHISLEHAHTTVAQACLGLLLQSDRVDRQRIDGWPLAKYAARYWVNHAQFGNVSSSIRNAMESLFDPNNPYFMVWVSIWDVDEEWSTSRPLDAPPKHTATALYYAALCGFRDMVEWLAMRHLQDVNARGGNYVTPLRATSARGYLNVALLLLEHGADVNLADDFGQTPLHLAAKMGHSEMAALLLEHGGNVNARDVQQQTPLLHAAQEGKLEVARVLVRCGTDVGAQDKDGETALHFAAQKNHLEIATLLLGHGATANALNTRQLTPLHYAAHNGNLEATRVLLLHGADVEARTLNRQTALHLAALKNHSEIATLLLEHGANANAKSLDELTPLLCAAQEGQLDVMRVLLLHAADVRDRTLRGEIALHLAARENHSMAATLLLQHGFNAND…	OCH94796.1	1.5e-25	hypothetical protein OBBRIDRAFT_746651, partial [Obba rivulosa]	No differential expression	Not secreted	NA	NA	PF12796.8,PF13637.7,PF00023.31,PF13857.7,PF13606.7	Ank_2,Ank_4,Ank,Ank_5,Ank_3
Lactarius akahatsu	Lacaka1|MSTRG.6032	14419	422	MQSILSRLRTRAVSPTSPHSAQSAHPAPTTATTVTTPTHDEQADEENKPPMPVQGSAPVTRKIYRDLDLLTNEFATEPSSIRRGLPPPVRRGPPSSSNPSTPILGPAEPSVPQATPTTNAERDSPKVSRSSSSSGNSAPHGGRGFMERLGDWSTFGRRRAPPPSLNEFGAAQISPSPSAWRTRRTNSRLSSRPSSNRSTQSSPHENNNNTPRPSYQSSSDRRAHKRGSTLGSREPAPDSSPAHTLEHPSPEVSIVPPLPTLEHPALRSSGTTATYPPGALRARTKNGGEITPGRLTFGKSLRPYRSLPRVQHIFKSRSEDKGERGDVLARAGDDDKGQGEIVPVPTGTQSSLACVPILPVPSSFIPTSTPSSSSSSSKSAPAVGSRDPHEPVPVASNLY…	NA	NA	NA	No differential expression	Not secreted	NA	NA	NA	NA
Lactarius akahatsu	Lacaka1|MSTRG.6034	2295	424	MRVCHRWREIIFASPLRLDLQLLCTHGKPQAVWEYLQRWPPTFPVAVDYGYTSGKNPTPEDEDNIFTTLELREIRERIRPFRLSITDGVLAEVIALMRKPFPELRHLAISSYPGRDTRGQDGPALPRNFLGGSAPSLREISFNGIRFPALPTLLSSTSDLVKLIVINIPKTAYFAPAAFAACLAVLPRLEELSIGFQSLPSCTNQTHPPPETRAVLPSLASFTFVGDSAYLEVVVPLVDTPQLYSIDITYSDQQDIQVTELSKLIVRSGIKPSQFGHAEISFVHDSICFYSFLETDPDEPTIAIQVLSDEEIDELVDVMAPVLNQASAMLSDVVHLEVTFDRDWQLSDDDTVNDIEWLELFRPFTAVEKLRIYEKLAESINDVLEDQPEEIGAQVLPAL…	NA	NA	NA	No differential expression	Not secreted	NA	NA	NA	NA
Lactarius akahatsu	Lacaka1|MSTRG.10031	2226	426	MGFRSDIDAISDFFPKAPLRQTFLFSATVSPQVRQIAREVLDKDHTFIDVVPKDSSPVHAHIPQHFTFLPSAKEQLPQLIRLIAHDQLVNPRNSKIIVFLNTTKQTQLFATLLRDLSKTTLPARSQIYEIHSKRTQSSRSTASNAFRRDRSGAAILVTSDVSARGVDYPDVTRVIQVGIPASSEQYVHRVGRTGRAGKSGRADLLLLPHEHNFVRYQLADMPIKDHSHDELLKETSMLAEKFESDSAESSNGVAAGKQHTGRFAPKDRHFRSNPSAALANLNTEITGLLDQVDTEAIEEVFVSLLGFYFGKSGELRVSRRSIYEGLQAWTTEACGLPKPPHVSASLLAKMGGLDGGAPAHSAQRGPLRRSFGFKAPGARYGNSEWNRGYNERTDSEFSR…	KIM78205.1	1e-98	hypothetical protein PILCRDRAFT_824683 [Piloderma croceum F 1598]	No differential expression	Not secreted	NA	U74	PF00271.32	Helicase_C
Lactarius akahatsu	Lacaka1|MSTRG.5283	2813	427	MLQCLAVAIRPLSVAELAELLAFDFNATKGGIPELNPNWRWEDHEQAVLSTCSSLITIVPAYGSRSPVVQFSHFSVKEFLMSDRLSTPTKDLSRFHIVPEVANTLIARACLSVLLRDPIDEDSTATAPLTRYAAEYWVTHAQVENVAPRIRDGMEYLFDPDRPYFSAWVKLYHDVHSNWTDDLKSKMLPRAAPLYYAALCGFHEIVERLALKYPQYTNAICGTTGTALHSASVEGHIEVVRSLLKYGADVDARGILGQSPLQLASHEGHLNVVRCLLDHGADAEFRGDIRMTPLTYAATWGTLEIVRVLLEHNVDVNSQDNDGMTPIHQLLYEGRSSNPQSDRPQVVRLLLEHGADPNIRDNECRTSLHLVSSSNLVLSLRLEIARILLAHGADVNAED…	OCH87556.1	1.2e-46	hypothetical protein OBBRIDRAFT_735932, partial [Obba rivulosa]	No differential expression	Not secreted	NA	NA	PF12796.8,PF13637.7,PF00023.31,PF13606.7,PF13857.7	Ank_2,Ank_4,Ank,Ank_3,Ank_5
Lactarius akahatsu	Lacaka1|MSTRG.4641	6992	428	MMAKLWGDNFFNPATKKWSTKPTDADGKPLERAFNQFVLDPIFKIFEFVMDFKKDKIGPILEKLDIKLAQNERDLEGKALLKVVMRKFLPAGDSLLEMIVINLPSPATAQRYRVETLYEGPMDDESAIGIRDCDPKGPLVLYVSKMVPTSDKGRFYAFGRVFSGTVRSGPKIRIQGPNYVPGKKEDLFVKSVQRTVLMMGRYVEPIEDCPAGNIVGLVGVDQFLLKTGTLTTSETAHNMKVMKFSVSPVVQVAVEVKNAADLPKLVEGLKRLSKSDPCVQAWIAETGEHIVAGAGELHLEICLKVSAFYPTYAPCSNSTAFPRICKTTMPVFRSRSQILSSVIVRPSRQSRPLLRFQNRRTSTTGYTPKHCHSTKSLRSPLRAVKSLRAMTSNCAPVSL…	EUC63850.1	1.7e-162	translation elongation factor 2 [Rhizoctonia solani AG-3 Rhs1AP]	No differential expression	Not secreted	NA	NA	PF03144.26,PF14492.7	GTP_EFTU_D2,EFG_III
Lactarius akahatsu	Lacaka1|MSTRG.8974	4667	428	FRWVFCQLEALRHCLAPSLRHTLEELPESLDETYERILKEINKANQRHAHRLLQCLTVADRPLRVEELAEVLAVDFNAGGVPKFNAAWCWEDQEEVVLSACSSLVSVITDNGSRVIQFSHFSVKEFLTSDRLASSVGEISYFHIPLEPAHTIFAQACLGVLHRVDDHTDGDGIETIPLVQYAAKHWVKHVLFENVELRIKDSLDYFFDMDKPHFSAWVKLHNIDKFPWPITSEWDEAALTTAAPLYYAARCGFHGLVGRLVYKTPELVNARGGRCGTALHASLVDGHTKVAQLLFAYGADINSRGTWKWTPLHVASAFGHLDAVKWLLDHGADADHRQAKGWTPLLLAAANGHLEVARILLKHEAEVNVRNVEGSTPLHEASEGGYPDVVRLLLDHDAD…	OCH94796.1	1.1e-68	hypothetical protein OBBRIDRAFT_746651, partial [Obba rivulosa]	No differential expression	Not secreted	NA	NA	PF13637.7,PF12796.8,PF13857.7,PF13606.7,PF00023.31	Ank_4,Ank_2,Ank_5,Ank_3,Ank
Lactarius akahatsu	Lacaka1|MSTRG.9868	16326	428	MPTEHPERPEATPLYYAILCGFHWLIEDFMVTYPGDIDAQGGWHRTPLLAAFFKENIDVALSLLRCGADVNILDDGGQTPLHRASATGRVEIVRLLLKHDADVNILTPGRVAPLLLASAIGSLEIASLLVRRGANVNSRTSDNWTPLNVASDNGHLKVVQLLIDSGADVDSPNGKGRTPLHSAASNGNLDIVKLLIASGADVNIRTGDGKTPLDLASVHGKLEVASFLSRPIARAMSLDGAMNPPTPQPRNNTVQPLRNHEEGNHTDNERPSVYTASENGQLDILRSLLDCGADVDEKYSFRMTALHAASSKGELEVAKLLIERGAQVDARSRGGWTPLHSASRYGNLDVIRLLLDHGADVNAKSRDRGAALHYASVTGPLEAIQLLLERGADVDLQNV…	NA	NA	NA	No differential expression	Not secreted	NA	NA	PF12796.8,PF13637.7,PF00023.31,PF13857.7,PF13606.7	Ank_2,Ank_4,Ank,Ank_5,Ank_3
[truncated: 8,284 more rows]
