# Supplementary material for: Transcriptome Profiling Reveals Differential Gene Expression of Secreted Proteases and Highly Specific Gene Repertoires Involved in Lactarius–Pinus Symbioses
Source: Front Plant Sci. 2021 Aug 19;12:714393. doi: 10.3389/fpls.2021.714393 (PMC8417538; doi:10.3389/fpls.2021.714393)
Supplement: Supplementary Table 3 — Lactarius genes induced during Mycorrhization. Data are split in different sheets according to the species: L. akahatsu (Sheet S3A), L. deliciosus (Sheet S3B), L. sanguifluus (Sheet S3C), and L. vividus (Sheet S3D); gene functional annotation (secretion, lipase, CAZyme, lectin, subtilase, EC number, PFAM domain, KOG, cluster ID, and orhogroup ID) and expression (TPM) in each sample are also included in this table. [file Table_3.XLSX]

## Sheet: Table S3-Title
Table S3. Lactarius genes induced during Mycorrhization. Data are split in different sheets according to the species: L. akahatsu (Sheet S3A), L. deliciosus (Sheet S3B), L. sanguifluus (Sheet S3C) and L. vividus (Sheet S3D); gene functional annotation (secretion, lipase, CAZyme, lectin, subtilase, EC number, PFAM domain, KOG, cluster ID, orhogroup ID) and expression (TPM) in each sample are also …

## Sheet: Sheet S3A - L.akahatsu
Gene ID (this study)	JGI species ID	JGI protein ID	JGI gene ID	Gene regulation (genes are considered as differentially expressed if LFC > 2 or <-2 and p.value adjusted < 0.05)	Cluster in supplementary Figure S5	Secretion	Lipase	CAZyme family	CAZyme_substrate. PCW: Plant cell wall degrading enzyme.	Lectin	Subtilase family	Subtilase conservation. Subtilase missing one of their three catalytic regions were labelled as partial. If at least one of the catalytic region lack a perfect match to the pattern described in the litterature, the subtilase was labelled as containing a non-canonical region.	Enzyme Commission number	Enzyme Commission number description	PFAM domain ID	PFAM domain short description	KOG annotation	Highlighted functions	Highlighted functions additionnal details	Orthogroup ID	expression (TPM) in sample QPct1. (FLM)	expression (TPM) in sample QPct2. (FLM)	expression (TPM) in sample QPct3. (FLM)	expression (TPM) in sample QPtab1 (mycorrhiza)	expression (TPM) in sample QPtab2 (mycorrhiza)	expression (TPM) in sample QPtab3 (mycorrhiza)	log2FoldChange (LFC) between FLM and mycorrhiza	adjusted p.value
Lacaka1|1001923	Lacaka1	1001923	gene_5354	Induced during mycorrhization	III	NA	NA	NA	NA	NA	NA	NA	NA	NA	PF13520,PF00324	AA_permease_2,AA_permease	Amino acid transport and metabolism	Transporter/Permease	Amino acid permease	OG0004592	16.4676	11.223	12.4058	91.2812	77.3732	93.9589	2.8643	0.000792302
Lacaka1|111487	Lacaka1	111487	gene_5959	Induced during mycorrhization	III	NA	NA	NA	NA	NA	NA	NA	NA	NA	PF03169	OPT	Signal transduction mechanisms	Transporter/Permease	oligopeptide transporter	OG0002440	2.15541	2.99925	2.68846	151.387	174.776	145.4	5.98066	7.25e-134
Lacaka1|1770220	Lacaka1	1770220	gene_5567	Induced during mycorrhization	III	NA	NA	NA	NA	NA	NA	NA	NA	NA	PF00096,PF13894,PF13465	zf-C2H2,zf-C2H2_4,zf-H2C2_2	General function prediction only	Transcription factor	Unknown	OG0005030	47.852	34.2029	37.1335	335.449	355.905	456.348	3.09318	5.28e-08
Lacaka1|1791261	Lacaka1	1791261	gene_1256	Induced during mycorrhization	III	NA	NA	NA	NA	NA	NA	NA	5.2.1.8	Peptidylprolyl isomerase.	PF00254	FKBP_C	Posttranslational modification, protein turnover, chaperones	Other function	Peptidylprolyl isomerase.	OG0005240	2.00692	0.620666	2.85613	324.907	252.228	107.877	6.83293	7.27e-20
Lacaka1|1795495	Lacaka1	1795495	gene_3572	Induced during mycorrhization	III	NA	NA	NA	NA	NA	NA	NA	NA	NA	PF01467	CTP_transf_like	Coenzyme transport and metabolism	Other function	cytidylyltransferase	OG0005431	1.58691	2.32507	1.99035	25.9234	39.8672	39.8726	4.09122	9.45e-16
Lacaka1|1799178	Lacaka1	1799178	gene_6146	Induced during mycorrhization	III	NA	NA	NA	NA	NA	NA	NA	1.14.11.13	Gibberellin 2-beta-dioxygenase.	PF14226,PF03171	DIOX_N,2OG-FeII_Oxy	General function prediction only ; Secondary metabolites biosynthesis, transport and catabolism	Other function	Gibberellin 2-beta-dioxygenase.	OG0005538	8.25944	9.07698	9.05968	55.3512	71.1301	87.0136	2.77545	2.16e-06
Lacaka1|1831694	Lacaka1	1831694	gene_1863	Induced during mycorrhization	III	Secreted	NA	NA	NA	NA	NA	NA	3.4.16.5	Carboxypeptidase C.	PF00450	Peptidase_S10	Amino acid transport and metabolism ; Posttranslational modification, protein turnover, chaperones	Protease	Carboxypeptidase (S10)	OG0000184	4.36208	3.65938	3.11678	73.9259	53.8234	31.5924	3.89952	1.42e-10
Lacaka1|1833548	Lacaka1	1833548	gene_1111	Induced during mycorrhization	III	NA	NA	NA	NA	NA	NA	NA	NA	NA	PF13561,PF00106,PF08659	adh_short_C2,adh_short,KR	General function prediction only	Other function	PKS related	OG0006165	44.1231	42.787	44.9665	197.89	215.06	181.201	2.35492	0.029341
Lacaka1|1835766	Lacaka1	1835766	gene_2461	Induced during mycorrhization	III	NA	NA	NA	NA	NA	NA	NA	NA	NA	PF04082,PF00172	Fungal_trans,Zn_clus	NA	Transcription factor	Fungal specific transcription factor domain	OG0006234	49.4536	55.8919	46.5992	288.904	343.637	292.049	2.54916	0.000511649
Lacaka1|1838041	Lacaka1	1838041	gene_3190	Induced during mycorrhization	III	NA	NA	NA	NA	NA	NA	NA	NA	NA	NA	NA	NA	Unknown	Unknown	OG0006290	9.11114	8.06609	9.51268	98.4426	84.879	100.007	3.02378	3.84e-10
Lacaka1|1871219	Lacaka1	1871219	gene_5438	Induced during mycorrhization	III	NA	NA	NA	NA	NA	NA	NA	NA	NA	PF00083,PF07690,PF13347	Sugar_tr,MFS_1,MFS_2	Inorganic ion transport and metabolism	Transporter/Permease	Sugar transporter	OG0006914	9.42732	8.56943	9.19751	72.1954	47.9475	37.1555	2.69855	0.0110132
Lacaka1|1886843	Lacaka1	1886843	gene_8470	Induced during mycorrhization	III	NA	NA	NA	NA	NA	NA	NA	NA	NA	NA	NA	NA	Unknown	Unknown	OG0001842	2.82369	1.96436	1.69588	23.7172	18.0884	14.4527	3.46043	4.14e-07
Lacaka1|1935300	Lacaka1	1935300	gene_5653	Induced during mycorrhization	III	NA	NA	NA	NA	NA	NA	NA	NA	NA	PF00069,PF07714	Pkinase,Pkinase_Tyr	Signal transduction mechanisms	Other function	Tyrosine kinase	OG0007459	58.1139	61.43	68.4598	928.418	994.645	695.85	3.67866	1.07e-28
Lacaka1|1941242	Lacaka1	1941242	gene_2314	Induced during mycorrhization	III	NA	NA	NA	NA	NA	NA	NA	NA	NA	PF00248	Aldo_ket_red	Energy production and conversion	Other function	Aldo/keto reductase	OG0007655	6.12839	6.86716	6.94006	43.6196	75.1176	72.2973	3.52084	7e-35
Lacaka1|1953181	Lacaka1	1953181	gene_11728	Induced during mycorrhization	III	NA	NA	NA	NA	NA	NA	NA	NA	NA	PF03169	OPT	Signal transduction mechanisms	Transporter/Permease	oligopeptide transporter	OG0002038	116.117	103.186	110.561	1325.6	1107.3	940.241	3.38823	3.98e-24
Lacaka1|1973718	Lacaka1	1973718	gene_3532	Induced during mycorrhization	III	NA	NA	NA	NA	NA	NA	NA	3.6.1.3	Adenosinetriphosphatase.	PF00664,PF00005,PF02463	ABC_membrane,ABC_tran,SMC_N	Secondary metabolites biosynthesis, transport and catabolism	Other function	Structural maintenance of chromosomes protein	OG0000144	10.9038	10.8264	12.388	40.1948	47.493	57.7853	3.02252	6.45e-07
Lacaka1|2035421	Lacaka1	2035421	gene_2741	Induced during mycorrhization	III	NA	NA	NA	NA	NA	NA	NA	NA	NA	PF00474	SSF	Amino acid transport and metabolism	Transporter/Permease	Unknown transporter	OG0008175	9.74648	7.0073	10.363	94.0845	110.915	113.654	3.325	1.76e-23
Lacaka1|2111048	Lacaka1	2111048	gene_1816	Induced during mycorrhization	III	NA	NA	NA	NA	NA	NA	NA	NA	NA	PF00083,PF07690	Sugar_tr,MFS_1	General function prediction only	Transporter/Permease	Sugar transporter	OG0004100	3.90982	5.29641	6.36251	1081.42	2279.89	2085.35	8.58953	2.1e-70
Lacaka1|269297	Lacaka1	269297	gene_10626	Induced during mycorrhization	III	NA	NA	NA	NA	NA	NA	NA	1.1.3.15	(S)-2-hydroxy-acid oxidase.	PF01070,PF00478	FMN_dh,IMPDH	Energy production and conversion	Other function	(S)-2-hydroxy-acid oxidase.	OG0000094	1.51352	2.51477	1.38289	16.103	14.874	42.829	3.22382	3.58e-06
Lacaka1|54481	Lacaka1	54481	gene_412	Induced during mycorrhization	III	NA	NA	NA	NA	NA	NA	NA	NA	NA	PF11911	DUF3429	NA	Unknown	Unknown	OG0004240	2.62405	0	26.638	0	0	0	4.13348	3.02e-37
Lacaka1|78114	Lacaka1	78114	gene_599	Induced during mycorrhization	III	NA	NA	NA	NA	NA	NA	NA	NA	NA	PF01593,PF13450	Amino_oxidase,NAD_binding_8	Secondary metabolites biosynthesis, transport and catabolism	Other function	Holds a Amino_oxidase domain	OG0008914	5.30218	5.20984	4.4604	282.124	131.529	249.396	4.85481	2.68e-37
Lacaka1|1032854	Lacaka1	1032854	gene_6969	Induced during mycorrhization	IV	NA	NA	NA	NA	NA	NA	NA	NA	NA	PF00011	HSP20	Posttranslational modification, protein turnover, chaperones	Other function	heat shock protein Hsp20 / chaperones	OG0002414	22.982	15.2367	15.085	278.462	166.83	222.901	3.42941	4.02e-10
Lacaka1|1070502	Lacaka1	1070502	gene_7648	Induced during mycorrhization	IV	NA	NA	NA	NA	NA	NA	NA	NA	NA	NA	NA	NA	Unknown	Unknown	OG0013758	6.25653	7.30563	8.54546	39.7616	48.1034	43.2317	2.67338	3.44e-05
Lacaka1|1128834	Lacaka1	1128834	gene_10035	Induced during mycorrhization	IV	NA	NA	NA	NA	NA	NA	NA	NA	NA	NA	NA	NA	Unknown	Unknown	OG0000643	12.952	10.4523	13.5489	324.307	408.233	488.014	4.98743	1.12e-53
Lacaka1|1172152	Lacaka1	1172152	gene_2366	Induced during mycorrhization	IV	NA	NA	NA	NA	NA	NA	NA	1.14.18.1	Monophenol monooxygenase.	PF00264	Tyrosinase	NA	Other function	Tyrosinase	OG0004677	50.6207	58.6988	54.7078	312.286	451.34	636.495	2.97483	3.49e-05
Lacaka1|1263515	Lacaka1	1263515	gene_7176	Induced during mycorrhization	IV	SSP	NA	NA	NA	NA	NA	NA	NA	NA	NA	NA	NA	Unknown	Unknown	OG0002483	0.424811	1.09286	1.15473	74.4242	110.814	98.7609	7.06405	2.78e-63
Lacaka1|1296701	Lacaka1	1296701	gene_10643	Induced during mycorrhization	IV	NA	NA	NA	NA	NA	NA	NA	4.2.1.1	Carbonate dehydratase.	PF00484	Pro_CA	Inorganic ion transport and metabolism	Other function	Carbonate dehydratase.	OG0009573	30.6005	28.9246	30.7013	291.321	276.978	249.685	4.46203	1.53e-65
Lacaka1|1310021	Lacaka1	1310021	gene_3017	Induced during mycorrhization	IV	NA	NA	NA	NA	13c4__5ID8 Oyster lectin	NA	NA	NA	NA	PF11901	DUF3421	NA	Lectin	Oyster lectin	OG0004762	10.9294	6.68127	6.55129	184.539	239.907	418.093	5.08932	7.95e-16
Lacaka1|148469	Lacaka1	148469	gene_5016	Induced during mycorrhization	IV	NA	NA	NA	NA	NA	NA	NA	NA	NA	PF03169	OPT	Signal transduction mechanisms	Transporter/Permease	oligopeptide transporter	OG0000211	8.81755	8.17746	8.69459	85.9025	63.6703	49.1482	3.57712	7.05e-12
Lacaka1|1528236	Lacaka1	1528236	gene_2854	Induced during mycorrhization	IV	NA	NA	NA	NA	NA	NA	NA	NA	NA	NA	NA	NA	Unknown	Unknown	OG0002565	126	140.048	132.624	1497.77	1800.77	2000.95	3.62216	2.3e-31
Lacaka1|1539658	Lacaka1	1539658	gene_2957	Induced during mycorrhization	IV	NA	NA	NA	NA	NA	NA	NA	NA	NA	PF00651	BTB	NA	Transcription factor	Holds a BTB domain	OG0009608	18.3112	21.3382	16.6307	366.349	901.101	1217.87	5.45683	5.75e-10
Lacaka1|165750	Lacaka1	165750	gene_5146	Induced during mycorrhization	IV	NA	NA	NA	NA	NA	NA	NA	NA	NA	PF09729	Gti1_Pac2	Carbohydrate transport and metabolism ; Signal transduction mechanisms	Other function	Holds a Gti1_Pac2 domain	OG0002619	8.2533	8.00645	6.49343	210.639	165.656	209.699	4.49134	8.06e-61
Lacaka1|1787901	Lacaka1	1787901	gene_32	Induced during mycorrhization	IV	NA	NA	NA	NA	NA	NA	NA	NA	NA	PF07690	MFS_1	Carbohydrate transport and metabolism	Transporter/Permease	Unknown transporter	OG0001523	5.5767	5.06828	3.43205	78.148	82.597	83.8148	3.71789	1.68e-52
Lacaka1|1791873	Lacaka1	1791873	gene_2394	Induced during mycorrhization	IV	NA	NA	NA	NA	NA	NA	NA	NA	NA	PF00067	p450	Secondary metabolites biosynthesis, transport and catabolism	Cytochrome p450		OG0005273	6.68957	6.02887	5.30422	43.4512	40.5892	38.1343	2.5134	0.00543817
Lacaka1|1792359	Lacaka1	1792359	gene_3207	Induced during mycorrhization	IV	NA	NA	NA	NA	NA	NA	NA	NA	NA	PF11710	Git3	NA	Other function	G protein-coupled glucose receptor	OG0005286	11.9538	11.428	13.0683	60.0432	67.8507	78.1693	2.69775	1.09e-05
Lacaka1|1794753	Lacaka1	1794753	gene_4083	Induced during mycorrhization	IV	NA	NA	NA	NA	NA	NA	NA	NA	NA	PF04143	Sulf_transp	NA	Transporter/Permease	Sulfur transporter	OG0005388	4.66907	3.257	2.89929	135.664	174.288	187.76	5.34256	2.64e-50
Lacaka1|1795107	Lacaka1	1795107	gene_3514	Induced during mycorrhization	IV	NA	NA	GH3	NA	NA	NA	NA	3.2.1.21	Beta-glucosidase.	PF01915,PF00933,PF14310	Glyco_hydro_3_C,Glyco_hydro_3,Fn3-like	NA	CAZyme	Glycoside Hydrolase	OG0002732	18.2408	18.2766	19.7039	188.492	227.599	210.2	3.39434	7.98e-27
Lacaka1|1795424	Lacaka1	1795424	gene_3738	Induced during mycorrhization	IV	NA	NA	NA	NA	NA	NA	NA	NA	NA	PF00067	p450	Secondary metabolites biosynthesis, transport and catabolism	Cytochrome p450		OG0002736	1.41153	1.71591	1.86885	28.9484	41.0331	36.8264	3.9866	5.87e-36
Lacaka1|1795539	Lacaka1	1795539	gene_3704	Induced during mycorrhization	IV	NA	NA	NA	NA	NA	NA	NA	NA	NA	PF00230	MIP	Carbohydrate transport and metabolism	Transporter/Permease	MIP	OG0005432	9.73181	13.8431	12.1613	1041.79	1458.32	1171.13	6.99476	6.32e-229
Lacaka1|1795627	Lacaka1	1795627	gene_3742	Induced during mycorrhization	IV	NA	NA	NA	NA	NA	NA	NA	NA	NA	PF01036	Bac_rhodopsin	NA	Other function	putative opsin	OG0001551	9.0862	9.51387	7.27057	86.5652	85.9216	112.888	3.73712	1.53e-22
Lacaka1|1796518	Lacaka1	1796518	gene_4211	Induced during mycorrhization	IV	NA	NA	NA	NA	NA	NA	NA	NA	NA	PF00172	Zn_clus	NA	Transcription factor	Holds a zinc finger domain	OG0001562	17.4071	9.94592	10.4881	232.991	302.805	247.995	4.35799	3.79e-29
Lacaka1|1798991	Lacaka1	1798991	gene_5665	Induced during mycorrhization	IV	NA	NA	NA	NA	NA	NA	NA	NA	NA	NA	NA	NA	Unknown	Unknown	OG0005531	31.5116	35.8792	30.2485	540.086	670.235	365.404	3.66414	4.92e-19
Lacaka1|1799508	Lacaka1	1799508	gene_8079	Induced during mycorrhization	IV	NA	NA	AA3_3	PartialPCWdegradation	NA	NA	NA	1.1.3.13	Alcohol oxidase.	PF00732,PF05199	GMC_oxred_N,GMC_oxred_C	General function prediction only	CAZyme	Alcohol oxidase	OG0005541	3.3866	3.01918	2.59239	29.4036	31.9783	20.2274	3.14864	9.55e-09
Lacaka1|1799712	Lacaka1	1799712	gene_8933	Induced during mycorrhization	IV	NA	NA	NA	NA	NA	NA	NA	NA	NA	PF07690,PF00083	MFS_1,Sugar_tr	General function prediction only	Transporter/Permease	Sugar transporter	OG0002797	10.1542	9.17692	8.3038	104.651	89.131	52.8352	3.16908	7.49e-06
Lacaka1|1802000	Lacaka1	1802000	gene_7199	Induced during mycorrhization	IV	NA	NA	NA	NA	NA	NA	NA	NA	NA	NA	NA	NA	Unknown	Unknown	OG0009706	160.376	198.767	205.92	3106.02	3721.45	2843.4	3.88904	8.16e-49
Lacaka1|1804211	Lacaka1	1804211	gene_8573	Induced during mycorrhization	IV	NA	NA	NA	NA	NA	NA	NA	NA	NA	PF11700,PF07690	ATG22,MFS_1	NA	Transporter/Permease	Amino acid or protein transporter	OG0001608	6.30043	6.58268	6.23332	229.254	236.168	169.516	5.18106	1.88e-129
Lacaka1|1805791	Lacaka1	1805791	gene_15351	Induced during mycorrhization	IV	NA	NA	NA	NA	NA	NA	NA	6.3.2.19	Ubiquitin--protein ligase.	PF13639,PF00097,PF13445,PF14634	zf-RING_2,zf-C3HC4,zf-RING_UBOX,zf-RING_5	Posttranslational modification, protein turnover, chaperones	Transcription factor	Ubiquitin--protein ligase.	OG0009722	0.474996	1.73669	0.998204	39.3289	32.6365	21.7541	5.01619	7.91e-19
Lacaka1|1812944	Lacaka1	1812944	gene_879	Induced during mycorrhization	IV	NA	NA	NA	NA	NA	NA	NA	NA	NA	PF02171,PF16486,PF16488,PF08699,PF16487,PF02170	Piwi,ArgoN,ArgoL2,ArgoL1,ArgoMid,PAZ	Translation, ribosomal structure and biogenesis	Other function	Piwi/argonaute	OG0000501	10.2089	8.88452	9.47254	75.3054	88.9727	74.3639	3.09691	4.73e-33
Lacaka1|1817625	Lacaka1	1817625	gene_8684	Induced during mycorrhization	IV	NA	NA	NA	NA	NA	NA	NA	NA	NA	PF00096,PF13465,PF13894	zf-C2H2,zf-H2C2_2,zf-C2H2_4	Transcription	Transcription factor	Holds a zinc finger domain	OG0002956	94.8849	102.732	107.069	575.198	616.575	543.967	2.34847	0.00399515
Lacaka1|1819284	Lacaka1	1819284	gene_12905	Induced during mycorrhization	IV	Secreted	NA	GH131	Cellulose	NA	NA	NA	NA	NA	NA	NA	NA	CAZyme	Glycoside Hydrolase	OG0005821	15.5863	15.8186	15.4585	133.099	118.731	180.138	3.10078	4.3e-09
Lacaka1|1822909	Lacaka1	1822909	gene_16522	Induced during mycorrhization	IV	NA	NA	NA	NA	NA	NA	NA	1.14.13.-	With NADH or NADPH as one donor, and incorporation of one atom	PF00067	p450	Secondary metabolites biosynthesis, transport and catabolism	Cytochrome p450		OG0000474	2.72103	3.0731	3.50811	42.4962	45.0412	40.8312	2.94952	0.000173956
Lacaka1|1838718	Lacaka1	1838718	gene_1924	Induced during mycorrhization	IV	NA	NA	NA	NA	NA	NA	NA	NA	NA	PF07690,PF00083	MFS_1,Sugar_tr	General function prediction only	Transporter/Permease	Sugar transporter	OG0006310	10.2532	9.7166	3.31636	27.0815	37.3731	33.4233	3.43162	2.18e-08
Lacaka1|1848574	Lacaka1	1848574	gene_3478	Induced during mycorrhization	IV	NA	NA	NA	NA	NA	NA	NA	NA	NA	NA	NA	NA	Unknown	Unknown	OG0006551	26.6653	22.3351	24.0159	544.297	1075.86	794.72	5.07133	5.58e-39
Lacaka1|1850035	Lacaka1	1850035	gene_3720	Induced during mycorrhization	IV	NA	NA	NA	NA	NA	NA	NA	NA	NA	PF04889	Cwf_Cwc_15	Function unknown	Other function	Holds a Cwf_Cwc domain	OG0000686	1.82738	2.77622	1.43319	17.1551	28.784	15.509	3.37392	0.000863705
Lacaka1|1854387	Lacaka1	1854387	gene_4328	Induced during mycorrhization	IV	NA	NA	NA	NA	NA	NA	NA	NA	NA	NA	NA	NA	Unknown	Unknown	OG0003229	4.33348	3.48574	6.02729	97.5512	79.4172	172.646	4.799	1.43e-19
Lacaka1|1859375	Lacaka1	1859375	gene_3869	Induced during mycorrhization	IV	NA	NA	NA	NA	NA	NA	NA	NA	NA	PF00581	Rhodanese	Inorganic ion transport and metabolism	Other function	Rhodanese	OG0006691	32.0863	30.8495	32.1008	193.104	219.507	197.426	2.85864	7.53e-11
Lacaka1|1864123	Lacaka1	1864123	gene_5568	Induced during mycorrhization	IV	NA	NA	NA	NA	NA	NA	NA	NA	NA	PF01068,PF04675,PF04679	DNA_ligase_A_M,DNA_ligase_A_N,DNA_ligase_A_C	Replication, recombination and repair	Other function	DNA ligase	OG0003302	6.69547	5.80365	5.40774	51.4615	55.5043	51.7279	3.09259	1.49e-15
Lacaka1|1883942	Lacaka1	1883942	gene_9689	Induced during mycorrhization	IV	Secreted	NA	GH3	NA	NA	NA	NA	3.2.1.21	Beta-glucosidase.	PF01915,PF00933,PF14310	Glyco_hydro_3_C,Glyco_hydro_3,Fn3-like	NA	CAZyme	Glycoside Hydrolase	OG0003442	2.77918	3.748	1.92869	125.305	110.887	116.609	5.27403	2.52e-104
Lacaka1|1886838	Lacaka1	1886838	gene_8469	Induced during mycorrhization	IV	NA	NA	NA	NA	NA	NA	NA	NA	NA	PF04506	Rft-1	NA	Other function	lipid-related	OG0000531	4.60531	3.35223	3.67366	54.303	54.5065	41.1058	3.6716	1.36e-10
Lacaka1|1887083	Lacaka1	1887083	gene_8512	Induced during mycorrhization	IV	NA	NA	NA	NA	NA	NA	NA	NA	NA	PF07690,PF00083	MFS_1,Sugar_tr	General function prediction only	Transporter/Permease	Sugar transporter	OG0003456	5.08143	5.15657	5.06635	170.691	231.557	232.987	5.49456	5.16e-72
Lacaka1|1892978	Lacaka1	1892978	gene_8569	Induced during mycorrhization	IV	NA	NA	NA	NA	NA	NA	NA	NA	NA	PF12697	Abhydrolase_6	NA	Other function	Abhydrolase	OG0009944	7.20704	4.92638	6.09804	31.8668	31.9591	40.2317	2.56608	0.00114569
Lacaka1|1932584	Lacaka1	1932584	gene_951	Induced during mycorrhization	IV	NA	NA	NA	NA	NA	NA	NA	NA	NA	NA	NA	NA	Unknown	Unknown	OG0007261	3.96284	3.3443	4.55553	61.739	40.1011	38.8178	3.43549	5.59e-08
Lacaka1|1933674	Lacaka1	1933674	gene_2842	Induced during mycorrhization	IV	NA	NA	NA	NA	NA	NA	NA	1.14.13.-	With NADH or NADPH as one donor, and incorporation of one atom	PF00067	p450	Secondary metabolites biosynthesis, transport and catabolism	Cytochrome p450		OG0007349	12.1403	8.779	9.79187	330.864	397.488	499.026	5.11414	1.51e-69
Lacaka1|1937150	Lacaka1	1937150	gene_15352	Induced during mycorrhization	IV	NA	NA	NA	NA	NA	NA	NA	NA	NA	PF05879	RHD3	NA	Other function	RHD3	OG0001946	14.9329	14.1377	15.9086	97.8736	101.817	81.6999	2.40571	0.0196626
Lacaka1|1940194	Lacaka1	1940194	gene_1818	Induced during mycorrhization	IV	NA	NA	NA	NA	NA	NA	NA	NA	NA	PF01794,PF08030,PF08022	Ferric_reduct,NAD_binding_6,FAD_binding_8	Inorganic ion transport and metabolism ; Secondary metabolites biosynthesis, transport and catabolism	Other function	Feric reductase	OG0007629	0.498809	0.744386	0.944621	7.19355	9.1897	10.3121	3.44986	7.95e-05
Lacaka1|1946502	Lacaka1	1946502	gene_5618	Induced during mycorrhization	IV	Secreted	NA	NA	NA	NA	NA	NA	NA	NA	PF07470	Glyco_hydro_88	NA	Other function	Holds a GH88 domain	OG0003773	7.69832	8.0788	8.5734	77.6301	73.6764	85.0926	3.27961	2.76e-19
Lacaka1|1947151	Lacaka1	1947151	gene_8080	Induced during mycorrhization	IV	NA	NA	AA3_3	PartialPCWdegradation	NA	NA	NA	1.1.3.13	Alcohol oxidase.	PF00732,PF05199	GMC_oxred_N,GMC_oxred_C	General function prediction only	CAZyme	Alcohol oxidase	OG0000783	7.77902	8.85203	8.67596	69.4745	70.1627	66.0525	2.90592	8.5e-16
Lacaka1|1948226	Lacaka1	1948226	gene_7628	Induced during mycorrhization	IV	NA	NA	NA	NA	NA	NA	NA	NA	NA	NA	NA	General function prediction only	Unknown	Unknown	OG0005800	5.42385	4.14129	5.15749	44.1958	52.4451	83.97	2.90825	0.000500728
Lacaka1|1948454	Lacaka1	1948454	gene_8273	Induced during mycorrhization	IV	NA	NA	NA	NA	NA	NA	NA	NA	NA	NA	NA	Inorganic ion transport and metabolism	Unknown	Unknown	OG0007887	65.1133	61.3791	65.083	196.166	219.98	237.946	2.27774	0.016297
Lacaka1|1948730	Lacaka1	1948730	gene_8982	Induced during mycorrhization	IV	NA	NA	NA	NA	NA	NA	NA	NA	NA	PF03169	OPT	Signal transduction mechanisms	Transporter/Permease	oligopeptide transporter	OG0001207	0.133766	0.135007	0.443981	3.45778	7.36282	4.77752	3.76968	3.03e-08
Lacaka1|1952037	Lacaka1	1952037	gene_10707	Induced during mycorrhization	IV	NA	NA	NA	NA	NA	NA	NA	1.14.14.1	Unspecific monooxygenase.	PF00067	p450	Lipid transport and metabolism ; Secondary metabolites biosynthesis, transport and catabolism	Cytochrome p450		OG0001220	2.06136	1.05733	1.94322	17.9974	17.9549	15.5554	2.96682	1.88e-15
Lacaka1|1952442	Lacaka1	1952442	gene_11076	Induced during mycorrhization	IV	NA	NA	NA	NA	NA	NA	NA	1.1.3.15	(S)-2-hydroxy-acid oxidase.	PF01070,PF00478	FMN_dh,IMPDH	Energy production and conversion	Other function	(S)-2-hydroxy-acid oxidase.	OG0000094	2.44788	1.29775	0.968658	8.40745	9.44412	0.707609	3.04031	0.00983222
Lacaka1|1952600	Lacaka1	1952600	gene_10582	Induced during mycorrhization	IV	NA	NA	NA	NA	NA	NA	NA	NA	NA	PF00067	p450	Secondary metabolites biosynthesis, transport and catabolism	Cytochrome p450		OG0002036	1.05917	1.25968	1.14393	17.8508	22.6541	24.7927	4.07419	6.56e-18
Lacaka1|1955315	Lacaka1	1955315	gene_15582	Induced during mycorrhization	IV	NA	NA	NA	NA	NA	NA	NA	NA	NA	PF07690,PF00083,PF06609	MFS_1,Sugar_tr,TRI12	General function prediction only	Transporter/Permease	Sugar transporter	OG0007473	51.658	54.5681	54.6405	504.416	528.808	519.451	3.18415	3.45e-33
Lacaka1|1957464	Lacaka1	1957464	gene_16192	Induced during mycorrhization	IV	NA	NA	NA	NA	NA	NA	NA	1.14.13.-	With NADH or NADPH as one donor, and incorporation of one atom	PF00067	p450	Secondary metabolites biosynthesis, transport and catabolism	Cytochrome p450		OG0000474	3.10496	3.03807	2.7719	48.6033	51.126	51.2125	3.87214	2.82e-19
Lacaka1|1975525	Lacaka1	1975525	gene_3703	Induced during mycorrhization	IV	Secreted	NA	NA	NA	NA	NA	NA	3.1.3.2	Acid phosphatase.	PF00328	His_Phos_2	Lipid transport and metabolism	Other function	Acid phosphatase.	OG0009725	8.20354	6.23794	5.92138	79.3426	94.4712	73.1191	3.50497	6.63e-25
Lacaka1|1976092	Lacaka1	1976092	gene_11951	Induced during mycorrhization	IV	NA	NA	GH31	Starch/Glycogen	NA	NA	NA	3.2.1.20	Alpha-glucosidase.	PF01055,PF16863,PF13802	Glyco_hydro_31,NtCtMGAM_N,Gal_mutarotas_2	Carbohydrate transport and metabolism	CAZyme	Glycoside Hydrolase	OG0003883	12.197	8.47643	9.86623	74.9486	70.1637	72.1151	2.6548	2.87e-06
Lacaka1|1980226	Lacaka1	1980226	gene_15584	Induced during mycorrhization	IV	NA	NA	NA	NA	NA	NA	NA	NA	NA	PF13519,PF05879	VWA_2,RHD3	General function prediction only	Other function	RHD3	OG0002059	14.9037	15.5522	14.9574	270.331	275.118	269.26	4.02305	3.13e-153
Lacaka1|1988296	Lacaka1	1988296	gene_4736	Induced during mycorrhization	IV	NA	NA	NA	NA	NA	NA	NA	NA	NA	PF07690	MFS_1	Carbohydrate transport and metabolism	Transporter/Permease	Unknown transporter	OG0008054	44.2147	40.9981	42.5084	334.291	476.856	445.828	3.5509	1.71e-23
Lacaka1|1999027	Lacaka1	1999027	gene_6095	Induced during mycorrhization	IV	NA	NA	NA	NA	NA	NA	NA	NA	NA	PF11951	Fungal_trans_2	NA	Transcription factor	Fungal specific transcription factor domain	OG0008071	117.179	112.776	122.381	692.148	790.914	708.439	2.66781	4.91e-08
Lacaka1|2014546	Lacaka1	2014546	gene_6761	Induced during mycorrhization	IV	NA	NA	GH47	NA	NA	NA	NA	3.2.1.113	Mannosyl-oligosaccharide 1,2-alpha-mannosidase.	PF01532	Glyco_hydro_47	Carbohydrate transport and metabolism	CAZyme	Glycoside Hydrolase	OG0002084	1.22727	0.70507	1.09509	23.0114	32.1219	31.0703	5.38976	1.02e-45
Lacaka1|2036981	Lacaka1	2036981	gene_11429	Induced during mycorrhization	IV	NA	NA	NA	NA	NA	NA	NA	1.13.11.5	Homogentisate 1,2-dioxygenase.	PF04209	HgmA	Amino acid transport and metabolism	Other function	Homogentisate 1,2-dioxygenase.	OG0003955	15.3854	15.4275	14.0742	128.512	101.881	94.4563	2.63794	5.08e-05
Lacaka1|2051529	Lacaka1	2051529	gene_846	Induced during mycorrhization	IV	NA	NA	NA	NA	NA	NA	NA	NA	NA	PF00122,PF00702,PF00403	E1-E2_ATPase,Hydrolase,HMA	Inorganic ion transport and metabolism	Other function	hydrolase	OG0008213	5.50167	5.09126	4.55159	36.1671	58.6305	55.291	3.22649	1.42e-07
Lacaka1|2065479	Lacaka1	2065479	gene_6847	Induced during mycorrhization	IV	NA	NA	NA	NA	NA	NA	NA	1.3.1.33	Protochlorophyllide reductase.	PF00106,PF13561,PF08659,PF01370,PF16363	adh_short,adh_short_C2,KR,Epimerase,GDP_Man_Dehyd	Secondary metabolites biosynthesis, transport and catabolism	Other function	Protochlorophyllide reductase.	OG0000400	8.9254	6.66083	7.81895	91.4877	79.084	90.0904	3.31234	3.46e-26
Lacaka1|2067796	Lacaka1	2067796	gene_7802	Induced during mycorrhization	IV	NA	NA	NA	NA	NA	NA	NA	NA	NA	PF01794,PF08030,PF08022	Ferric_reduct,NAD_binding_6,FAD_binding_8	Inorganic ion transport and metabolism ; Secondary metabolites biosynthesis, transport and catabolism	Other function	Feric reductase	OG0004012	2.24969	2.12816	2.13092	59.6097	41.3328	41.0593	4.32497	3.89e-27
Lacaka1|2085837	Lacaka1	2085837	gene_4828	Induced during mycorrhization	IV	NA	NA	NA	NA	NA	NA	NA	NA	NA	PF09994	DUF2235	NA	Unknown	Unknown	OG0001002	29.9607	12.9838	18.0831	159.838	174.741	170.297	3.09952	2.14e-07
Lacaka1|2103180	Lacaka1	2103180	gene_6838	Induced during mycorrhization	IV	NA	NA	NA	NA	NA	NA	NA	1.3.1.33	Protochlorophyllide reductase.	PF00106,PF13561,PF08659,PF01370,PF16363	adh_short,adh_short_C2,KR,Epimerase,GDP_Man_Dehyd	Secondary metabolites biosynthesis, transport and catabolism	Other function	Protochlorophyllide reductase.	OG0000400	33.0986	39.1312	33.0434	532.103	648.353	684.84	4.08214	2.04e-56
Lacaka1|2114806	Lacaka1	2114806	gene_5782	Induced during mycorrhization	IV	NA	NA	NA	NA	NA	NA	NA	NA	NA	NA	NA	NA	Unknown	Unknown	OG0000149	0.833484	0.410782	0.300575	7.84102	7.29859	7.64931	3.28627	3.27e-05
Lacaka1|2115204	Lacaka1	2115204	gene_8083	Induced during mycorrhization	IV	NA	NA	AA3_3	PartialPCWdegradation	NA	NA	NA	1.1.3.13	Alcohol oxidase.	PF00732,PF05199	GMC_oxred_N,GMC_oxred_C	General function prediction only	CAZyme	Alcohol oxidase	OG0010150	2.67727	2.32417	2.68608	42.666	50.1035	43.1033	3.83641	7.29e-36
Lacaka1|2115547	Lacaka1	2115547	gene_5302	Induced during mycorrhization	IV	NA	NA	NA	NA	NA	NA	NA	NA	NA	PF00083,PF07690	Sugar_tr,MFS_1	Inorganic ion transport and metabolism	Transporter/Permease	Sugar transporter	OG0001278	29.7441	25.2708	25.3609	177.565	140.596	171.242	2.53781	5.45e-06
Lacaka1|2117026	Lacaka1	2117026	gene_12803	Induced during mycorrhization	IV	NA	NA	NA	NA	NA	NA	NA	NA	NA	PF13361,PF00580,PF13538	UvrD_C,UvrD-helicase,UvrD_C_2	NA	Other function	Helicase	OG0004123	2.93999	3.76458	3.25565	39.0651	40.2117	29.9239	3.41168	2.92e-19
Lacaka1|2117892	Lacaka1	2117892	gene_11177	Induced during mycorrhization	IV	NA	NA	NA	NA	NA	NA	NA	1.6.99.1	NADPH dehydrogenase.	PF00724	Oxidored_FMN	Energy production and conversion ; General function prediction only	Other function	NADPH dehydrogenase.	OG0000794	0.246165	1.23257	0.466632	14.4026	10.164	11.6565	4.07178	0.00148685
Lacaka1|253071	Lacaka1	253071	gene_3498	Induced during mycorrhization	IV	NA	NA	NA	NA	NA	NA	NA	NA	NA	NA	NA	Function unknown	Unknown	Unknown	OG0008643	33.3065	36.2676	32.5279	2572.5	2077.26	1567.15	5.86415	3.77e-117
Lacaka1|315380	Lacaka1	315380	gene_7322	Induced during mycorrhization	IV	Secreted	CAH17527|GGGX|abH03	NA	NA	NA	NA	NA	3.1.1.3	Triacylglycerol lipase.	PF00135	COesterase	Signal transduction mechanisms	Lipase	Triacylglycerol lipase.	OG0002174	2.06486	1.90706	2.2174	18.7022	18.1341	15.212	2.96763	2.16e-08
Lacaka1|339790	Lacaka1	339790	gene_4805	Induced during mycorrhization	IV	Secreted	NA	NA	NA	NA	S53	cannonical region	3.4.14.9	Tripeptidyl-peptidase I.	PF09286	Pro-kuma_activ	NA	Protease	Sedolisin (S53)	OG0008680	13.0295	14.1697	14.5398	155.743	149.81	139.234	3.32263	5.39e-36
Lacaka1|405746	Lacaka1	405746	gene_4303	Induced during mycorrhization	IV	NA	NA	NA	NA	NA	NA	NA	NA	NA	NA	NA	NA	Unknown	Unknown	OG0008712	6.96066	6.9324	7.12161	125.8	165.695	186.997	4.91568	9.87e-56
Lacaka1|407974	Lacaka1	407974	gene_4325	Induced during mycorrhization	IV	NA	NA	NA	NA	NA	NA	NA	NA	NA	PF07690	MFS_1	NA	Transporter/Permease	Unknown transporter	OG0008716	12.5039	13.1381	13.5896	94.1076	71.9964	88.278	2.84601	3.57e-10
Lacaka1|451475	Lacaka1	451475	gene_11943	Induced during mycorrhization	IV	NA	NA	NA	NA	NA	NA	NA	2.1.1.110	Sterigmatocystin 7-O-methyltransferase.	PF00891	Methyltransf_2	General function prediction only	Other function	Methyltransferase	OG0008742	24.2267	16.6405	16.5792	130.827	89.4792	164.385	2.66973	0.0384462
Lacaka1|459170	Lacaka1	459170	gene_16731	Induced during mycorrhization	IV	NA	NA	NA	NA	NA	NA	NA	1.14.14.1	Unspecific monooxygenase.	PF00067	p450	Lipid transport and metabolism ; Secondary metabolites biosynthesis, transport and catabolism	Cytochrome p450		OG0008744	0.121661	0	0.085592	11.2664	7.80072	8.18639	5.32195	1.41e-18
Lacaka1|509841	Lacaka1	509841	gene_1864	Induced during mycorrhization	IV	NA	NA	NA	NA	NA	NA	NA	3.4.17.4	Gly-X carboxypeptidase.	PF01546,PF07687	Peptidase_M20,M20_dimer	Amino acid transport and metabolism	Protease	Carboxypeptidase (M20)	OG0010196	24.7584	22.7525	23.0958	162.166	136.611	119.163	2.55737	0.000402851
Lacaka1|520703	Lacaka1	520703	gene_6449	Induced during mycorrhization	IV	NA	NA	NA	NA	NA	NA	NA	NA	NA	PF14613	DUF4449	NA	Unknown	Unknown	OG0004231	4.41103	4.98841	4.85054	108.188	40.6819	49.4711	3.71964	0.00871564
Lacaka1|561906	Lacaka1	561906	gene_4622	Induced during mycorrhization	IV	NA	NA	NA	NA	NA	NA	NA	1.14.14.1	Unspecific monooxygenase.	PF00067	p450	Secondary metabolites biosynthesis, transport and catabolism	Cytochrome p450		OG0000123	4.09403	4.55133	3.68559	117.907	147.748	193.397	5.23444	1.19e-56
Lacaka1|600519	Lacaka1	600519	gene_12587	Induced during mycorrhization	IV	NA	NA	NA	NA	NA	NA	NA	1.1.1.65	Pyridoxine 4-dehydrogenase.	PF00248	Aldo_ket_red	Energy production and conversion	Other function	Aldo/keto reductase	OG0002207	2.14023	1.56441	1.88264	113.721	39.9863	52.3631	5.93067	3.37e-09
Lacaka1|606084	Lacaka1	606084	gene_12134	Induced during mycorrhization	IV	Secreted	NA	NA	NA	NA	NA	NA	NA	NA	PF07470	Glyco_hydro_88	NA	Other function	Holds a GH88 domain	OG0008817	0.464897	0.33851	0.780391	12.0835	10.4002	18.6382	4.56043	4.66e-12
Lacaka1|606342	Lacaka1	606342	gene_12135	Induced during mycorrhization	IV	Secreted	NA	NA	NA	NA	NA	NA	NA	NA	PF07470	Glyco_hydro_88	NA	Other function	Holds a GH88 domain	OG0008818	1.17894	1.45186	2.06618	12.5682	9.97718	10.2337	2.80694	0.0319076
Lacaka1|650657	Lacaka1	650657	gene_8221	Induced during mycorrhization	IV	NA	NA	NA	NA	NA	NA	NA	1.14.14.1	Unspecific monooxygenase.	PF00067	p450	Lipid transport and metabolism ; Secondary metabolites biosynthesis, transport and catabolism	Cytochrome p450		OG0008744	0.045899	0.413628	0.726647	12.5801	11.128	12.024	4.96523	3.07e-38
Lacaka1|782908	Lacaka1	782908	gene_6115	Induced during mycorrhization	IV	NA	NA	NA	NA	NA	NA	NA	NA	NA	NA	NA	NA	Unknown	Unknown	OG0004287	193.793	197.106	202.681	1216.06	1177.27	1520.64	2.56774	0.00102087
Lacaka1|785729	Lacaka1	785729	gene_6134	Induced during mycorrhization	IV	NA	NA	NA	NA	NA	NA	NA	NA	NA	NA	NA	NA	Unknown	Unknown	OG0008917	10.4274	10.5205	8.45111	333.847	467.285	481.49	5.21293	2.5e-62
Lacaka1|848964	Lacaka1	848964	gene_9905	Induced during mycorrhization	IV	Secreted	NA	NA	NA	NA	NA	NA	1.14.18.1	Monophenol monooxygenase.	PF00264	Tyrosinase	NA	Other function	Tyrosinase	OG0004296	9.17956	9.81195	9.12505	85.2553	59.6572	85.9645	2.88407	1.52e-06
Lacaka1|867505	Lacaka1	867505	gene_7803	Induced during mycorrhization	IV	NA	NA	NA	NA	NA	NA	NA	NA	NA	PF00248	Aldo_ket_red	Energy production and conversion	Other function	Aldo/keto reductase	OG0000243	1.18369	0.941678	0.860712	424.143	446.117	494.326	8.89315	2.03e-224
Lacaka1|872108	Lacaka1	872108	gene_7853	Induced during mycorrhization	IV	NA	NA	GH5_15	Glucan	NA	NA	NA	3.2.1.58	Glucan 1,3-beta-glucosidase.	PF00150	Cellulase	NA	CAZyme	Glycoside Hydrolase	OG0002241	2.14282	2.32758	1.85518	23.6245	36.2431	38.9341	3.92302	4.15e-24
Lacaka1|973164	Lacaka1	973164	gene_1322	Induced during mycorrhization	IV	Secreted	NA	NA	NA	NA	NA	NA	3.4.23.25	Saccharopepsin.	PF00026	Asp	Posttranslational modification, protein turnover, chaperones	Protease	Pepsin (A1)	OG0000398	1.53226	2.16257	1.05139	8.63513	11.7185	11.5547	2.85554	0.0221408
Lacaka1|MSTRG.2933	Lacaka1	NA	MSTRG.2933	Induced during mycorrhization	IV	NA	NA	NA	NA	NA	NA	NA	NA	NA	PF00067	p450	NA	Cytochrome p450		OG0011671	1.77898	1.25491	1.53956	10.7494	14.8074	11.8449	3.43055	1.43e-10
Lacaka1|MSTRG.5114	Lacaka1	NA	MSTRG.5114	Induced during mycorrhization	IV	NA	NA	NA	NA	NA	NA	NA	NA	NA	PF03169	OTP	NA	Transporter/Permease	oligopeptide transporter	OG0011900	2.44528	2.56745	2.70627	33.4612	37.0409	32.6536	3.91053	2.96e-06
Lacaka1|MSTRG.5686	Lacaka1	NA	MSTRG.5686	Induced during mycorrhization	IV	NA	NA	NA	NA	NA	NA	NA	NA	NA	PF00651	BTB	NA	Transcription factor	Holds a BTB domain	OG0011676	2.55329	3.14385	2.42695	1051.44	2135.43	1539.54	10.4055	4.11e-225
Lacaka1|MSTRG.7243	Lacaka1	NA	MSTRG.7243	Induced during mycorrhization	IV	NA	NA	CBM1	NA	NA	NA	NA	NA	NA	PF00933,PF01915	Glyco_hydro_3,Glyco_hydro_3_C	NA	Unknown	Unknown	OG0009070	1.83479	2.16431	1.27381	77.5895	66.6023	69.3392	5.22105	3.52e-41
Lacaka1|MSTRG.8592	Lacaka1	NA	MSTRG.8592	Induced during mycorrhization	IV	NA	NA	NA	NA	NA	NA	NA	NA	NA	PF00026	Asp	NA	Unknown	Unknown	OG0009077	11.612	10.819	11.1098	69.345	73.0536	69.9191	2.51946	0.0142043
Lacaka1|105687	Lacaka1	105687	gene_5879	Induced during mycorrhization	VII	NA	NA	NA	NA	NA	NA	NA	NA	NA	NA	NA	NA	Unknown	Unknown	OG0004622	2.1905	3.68634	2.35262	36.5052	59.3876	26.6624	3.72909	3.51e-09
Lacaka1|1132130	Lacaka1	1132130	gene_15067	Induced during mycorrhization	VII	NA	NA	NA	NA	NA	NA	NA	NA	NA	NA	NA	NA	Unknown	Unknown	OG0002443	3.73713	4.71283	5.38154	28.1479	27.2315	16.9228	2.56643	0.0155451
Lacaka1|1222750	Lacaka1	1222750	gene_8668	Induced during mycorrhization	VII	NA	NA	NA	NA	NA	NA	NA	NA	NA	NA	NA	NA	Unknown	Unknown	OG0004722	18.3152	15.5798	10.17	108.63	135.49	171.07	3.10743	3.33e-07
Lacaka1|1309553	Lacaka1	1309553	gene_3007	Induced during mycorrhization	VII	NA	NA	NA	NA	24c1__3QDY Fungal fruit body lectin	NA	NA	NA	NA	PF07367	FB_lectin	NA	Lectin	Fungal fruit body lectin	OG0004761	20.8803	25.0866	21.7428	1114.2	2793.06	16139.6	8.34133	5.4e-08
Lacaka1|1361818	Lacaka1	1361818	gene_13101	Induced during mycorrhization	VII	NA	NA	NA	NA	NA	NA	NA	NA	NA	NA	NA	NA	Unknown	Unknown	OG0000462	3.7905	5.48045	4.03404	43.3287	55.6086	59.1783	3.32618	1.42e-11
Lacaka1|1470073	Lacaka1	1470073	gene_12806	Induced during mycorrhization	VII	NA	NA	NA	NA	NA	NA	NA	NA	NA	PF13361,PF13538	UvrD_C,UvrD_C_2	NA	Other function	Helicase	OG0004883	3.51687	4.24519	4.61826	39.3496	38.7899	34.002	3.15341	1.52e-21
Lacaka1|1485097	Lacaka1	1485097	gene_8464	Induced during mycorrhization	VII	NA	NA	NA	NA	NA	NA	NA	NA	NA	NA	NA	NA	Unknown	Unknown	OG0000270	1.62636	2.07137	1.40104	18.6502	19.1862	15.489	2.9794	7.28e-10
Lacaka1|1488294	Lacaka1	1488294	gene_8504	Induced during mycorrhization	VII	NA	NA	NA	NA	NA	NA	NA	NA	NA	NA	NA	NA	Unknown	Unknown	OG0000271	1.21154	1.16519	1.20313	8.79965	8.09558	9.89453	3.17768	2e-07
Lacaka1|1575878	Lacaka1	1575878	gene_9884	Induced during mycorrhization	VII	Secreted	NA	NA	NA	NA	NA	NA	NA	NA	NA	NA	NA	Unknown	Unknown	OG0000663	3.18633	3.30628	2.52831	27.7332	33.2768	45.7379	3.34791	2.8e-06
Lacaka1|1629228	Lacaka1	1629228	gene_9796	Induced during mycorrhization	VII	NA	NA	NA	NA	NA	NA	NA	NA	NA	NA	NA	NA	Unknown	Unknown	OG0011285	6.69315	5.89942	6.25714	53.0315	82.1228	48.8214	3.47297	2.01e-15
Lacaka1|1794906	Lacaka1	1794906	gene_4116	Induced during mycorrhization	VII	NA	NA	NA	NA	NA	NA	NA	NA	NA	NA	NA	NA	Unknown	Unknown	OG0011321	20.5504	18.9037	24.9788	174.305	170.343	127.647	2.87892	7.86e-05
Lacaka1|1796670	Lacaka1	1796670	gene_7511	Induced during mycorrhization	VII	NA	NA	NA	NA	NA	NA	NA	NA	NA	PF00067	p450	Lipid transport and metabolism ; Secondary metabolites biosynthesis, transport and catabolism	Cytochrome p450		OG0000354	3.09431	2.72245	2.39424	21.4027	25.3089	33.945	3.40077	2.75e-07
Lacaka1|1801786	Lacaka1	1801786	gene_10396	Induced during mycorrhization	VII	NA	NA	NA	NA	NA	NA	NA	NA	NA	NA	NA	NA	Unknown	Unknown	OG0000692	12.8254	12.5356	11.3499	74.2366	77.8682	68.0755	2.54426	0.000243467
Lacaka1|1803652	Lacaka1	1803652	gene_10838	Induced during mycorrhization	VII	SSP	NA	NA	NA	NA	NA	NA	NA	NA	NA	NA	NA	Unknown	Unknown	OG0011335	1.18842	1.57627	2.29616	29.3169	12.4894	15.1218	3.60854	0.000807913
Lacaka1|1805720	Lacaka1	1805720	gene_10606	Induced during mycorrhization	VII	NA	NA	NA	NA	NA	NA	NA	NA	NA	NA	NA	NA	Unknown	Unknown	OG0001591	4.27093	3.05324	3.50588	29.2813	33.107	21.2154	2.89585	0.039739
Lacaka1|1805861	Lacaka1	1805861	gene_11975	Induced during mycorrhization	VII	NA	NA	NA	NA	NA	NA	NA	NA	NA	NA	NA	NA	Unknown	Unknown	OG0000663	2.05835	1.37977	1.3619	19.7521	18.6305	29.6472	3.38201	0.0235841
Lacaka1|1814381	Lacaka1	1814381	gene_5877	Induced during mycorrhization	VII	NA	NA	NA	NA	NA	NA	NA	NA	NA	PF01565	FAD_binding_4	Energy production and conversion	Other function	Holds a FAD binding domain	OG0000704	77.269	55.262	50.4054	3396.18	3335.09	1569.97	5.55299	1.88e-51
Lacaka1|1815365	Lacaka1	1815365	gene_6522	Induced during mycorrhization	VII	NA	NA	NA	NA	NA	NA	NA	NA	NA	NA	NA	NA	Unknown	Unknown	OG0001054	8.45967	4.13335	7.83721	55.3977	30.7347	0	2.94995	0.000129587
Lacaka1|1835405	Lacaka1	1835405	gene_2395	Induced during mycorrhization	VII	NA	NA	NA	NA	NA	NA	NA	NA	NA	NA	NA	NA	Unknown	Unknown	OG0006215	50.5116	58.8618	54.5429	161.42	171.041	129.463	2.70635	0.0282128
Lacaka1|1847169	Lacaka1	1847169	gene_4157	Induced during mycorrhization	VII	NA	NA	NA	NA	NA	NA	NA	NA	NA	NA	NA	NA	Unknown	Unknown	OG0000514	1.69801	1.59472	1.18153	44.33	7.74609	59.6079	4.82599	3.44e-05
Lacaka1|1857700	Lacaka1	1857700	gene_4656	Induced during mycorrhization	VII	NA	NA	NA	NA	NA	NA	NA	NA	NA	NA	NA	NA	Unknown	Unknown	OG0009903	3.95251	6.27891	3.19807	43.7086	26.4198	32.3711	4.34868	2.14e-18
Lacaka1|1861750	Lacaka1	1861750	gene_6297	Induced during mycorrhization	VII	Secreted	NA	NA	NA	NA	NA	NA	3.4.24.-	Metalloendopeptidases.	PF02128,PF07504	Peptidase_M36,FTP	NA	Protease	Fungalysin (M36)	OG0003286	7.01402	7.86403	7.86388	54.8079	52.8474	43.2869	2.64532	1.29e-06
Lacaka1|1886616	Lacaka1	1886616	gene_11670	Induced during mycorrhization	VII	NA	NA	NA	NA	NA	NA	NA	NA	NA	PF09286	Pro-kuma_activ	NA			OG0011525	1.86587	1.87183	0.490767	24.3276	32.052	41.1696	4.38274	5.4e-08
Lacaka1|1889796	Lacaka1	1889796	gene_10907	Induced during mycorrhization	VII	SSP	NA	NA	NA	NA	NA	NA	NA	NA	PF11937	DUF3455	NA	Unknown	Unknown	OG0003469	19.6774	20.5328	17.4404	689.011	546.071	605.278	4.95583	1.02e-127
Lacaka1|1896098	Lacaka1	1896098	gene_10785	Induced during mycorrhization	VII	NA	NA	NA	NA	NA	NA	NA	NA	NA	PF01822	WSC	Carbohydrate transport and metabolism ; Posttranslational modification, protein turnover, chaperones	Protease	Peptidase subfamily P2	OG0001861	13.4466	13.0297	10.5409	73.9699	119.103	150.298	2.58907	0.000191075
Lacaka1|1939100	Lacaka1	1939100	gene_362	Induced during mycorrhization	VII	NA	NA	NA	NA	NA	NA	NA	NA	NA	NA	NA	NA	Unknown	Unknown	OG0003686	18.0495	21.0095	19.6441	365.55	279.515	373.52	3.25486	3.74e-18
Lacaka1|1941291	Lacaka1	1941291	gene_2370	Induced during mycorrhization	VII	NA	NA	NA	NA	NA	NA	NA	NA	NA	PF00642,PF16131	zf-CCCH,Torus	NA	Transcription factor	pre-mRNA-splicing factor CWC2	OG0007657	10.2882	7.10747	6.78065	77.7987	96.3667	85.4907	3.26185	1.49e-13
Lacaka1|1946401	Lacaka1	1946401	gene_5861	Induced during mycorrhization	VII	NA	NA	NA	NA	NA	NA	NA	NA	NA	NA	NA	NA	Unknown	Unknown	OG0001199	28.7861	34.3869	30.6803	288.678	326.495	256.755	3.06988	1.28e-17
Lacaka1|1946677	Lacaka1	1946677	gene_6166	Induced during mycorrhization	VII	NA	NA	NA	NA	NA	NA	NA	NA	NA	PF00339	Arrestin_N	NA	Other function	Arrestin	OG0007840	11.8379	11.1685	11.1548	57.7577	53.5536	49.8122	2.48386	0.0357734
Lacaka1|1947310	Lacaka1	1947310	gene_9936	Induced during mycorrhization	VII	NA	NA	NA	NA	NA	NA	NA	NA	NA	PF12697,PF00561	Abhydrolase_6,Abhydrolase_1	NA	Other function	Abhydrolase	OG0001798	12.6488	16.7947	16.0277	118.421	101.86	89.622	2.81538	0.000127742
Lacaka1|1950637	Lacaka1	1950637	gene_12809	Induced during mycorrhization	VII	NA	NA	NA	NA	NA	NA	NA	NA	NA	PF13361,PF13538,PF00580,PF13245	UvrD_C,UvrD_C_2,UvrD-helicase,AAA_19	NA	Other function	Helicase	OG0004883	9.14598	12.0334	11.748	100.766	117.087	90.7125	3.10899	4.5e-14
Lacaka1|1951694	Lacaka1	1951694	gene_11600	Induced during mycorrhization	VII	NA	NA	NA	NA	NA	NA	NA	NA	NA	NA	NA	Signal transduction mechanisms	Unknown	Unknown	OG0011300	3.81882	2.44567	2.34905	26.8165	25.4573	27.3052	3.11931	0.000121663
Lacaka1|1955162	Lacaka1	1955162	gene_13864	Induced during mycorrhization	VII	NA	NA	NA	NA	NA	NA	NA	4.3.1.12	Ornithine cyclodeaminase.	PF02423	OCD_Mu_crystall	Amino acid transport and metabolism	Other function	Ornithine cyclodeaminase.	OG0000181	0.926705	2.20944	2.60036	23.9389	23.5807	28.6307	3.83377	6.2e-07
Lacaka1|1958976	Lacaka1	1958976	gene_16603	Induced during mycorrhization	VII	NA	NA	NA	NA	NA	NA	NA	NA	NA	NA	NA	NA	Unknown	Unknown	OG0001591	2.06963	2.67092	3.73908	23.4832	24.2345	21.3684	2.92656	0.000292099
Lacaka1|197829	Lacaka1	197829	gene_4038	Induced during mycorrhization	VII	NA	NA	NA	NA	NA	NA	NA	NA	NA	NA	NA	NA	Unknown	Unknown	OG0010065	5.01345	5.91154	5.24285	116.19	117.309	101.352	4.53665	5.34e-82
Lacaka1|197950	Lacaka1	197950	gene_4040	Induced during mycorrhization	VII	NA	NA	NA	NA	NA	NA	NA	NA	NA	NA	NA	NA	Unknown	Unknown	OG0002058	4.21441	3.96976	4.28874	114.539	105.076	78.4822	5.13147	1.26e-70
Lacaka1|1980112	Lacaka1	1980112	gene_15483	Induced during mycorrhization	VII	Secreted	NA	NA	NA	NA	NA	NA	NA	NA	NA	NA	NA	Unknown	Unknown	OG0000663	6.22925	5.1492	5.63117	39.6941	46.621	62.5318	3.00325	1.94e-06
Lacaka1|2020747	Lacaka1	2020747	gene_8382	Induced during mycorrhization	VII	NA	NA	NA	NA	NA	NA	NA	NA	NA	PF07173	GRDP-like	NA	Other function	GRDP-like	OG0003929	2.19944	2.67084	2.00558	13.761	15.4112	10.9248	2.65759	0.00360142
Lacaka1|2028188	Lacaka1	2028188	gene_9167	Induced during mycorrhization	VII	NA	NA	NA	NA	NA	NA	NA	1.14.13.12	Benzoate 4-monooxygenase.	PF00067	p450	Lipid transport and metabolism ; Secondary metabolites biosynthesis, transport and catabolism	Cytochrome p450		OG0000354	1.49935	1.35077	1.74968	11.0608	7.9556	9.92976	2.86653	0.00243294
Lacaka1|207024	Lacaka1	207024	gene_4149	Induced during mycorrhization	VII	NA	NA	NA	NA	NA	NA	NA	NA	NA	NA	NA	NA	Unknown	Unknown	OG0011674	1.66479	2.13583	2.34021	22.0536	17.6766	20.5987	2.95132	7.48e-05
Lacaka1|208111	Lacaka1	208111	gene_4159	Induced during mycorrhization	VII	NA	NA	NA	NA	NA	NA	NA	NA	NA	NA	NA	NA	Unknown	Unknown	OG0004026	4.39587	4.26896	4.25689	71.6743	116.368	127.256	4.73896	2.44e-42
Lacaka1|208393	Lacaka1	208393	gene_4168	Induced during mycorrhization	VII	NA	NA	NA	NA	NA	NA	NA	NA	NA	NA	NA	NA	Unknown	Unknown	OG0010109	3.21206	4.45377	5.39148	43.2295	41.0206	58.0835	3.78667	1.38e-20
Lacaka1|2088058	Lacaka1	2088058	gene_6307	Induced during mycorrhization	VII	Secreted	NA	NA	NA	NA	NA	NA	3.4.24.-	Metalloendopeptidases.	PF02128	Peptidase_M36	NA	Protease	Fungalysin (M36)	OG0000402	2.89138	4.04968	2.78079	57.012	81.4663	68.8113	4.23824	2.59e-32
Lacaka1|2106822	Lacaka1	2106822	gene_10806	Induced during mycorrhization	VII	NA	NA	NA	NA	NA	NA	NA	3.4.14.9	Tripeptidyl-peptidase I.	PF09286	Pro-kuma_activ	NA			OG0000219	0.056831	0.215712	0.389432	4.38128	5.9028	12.7222	4.5731	0.000225511
Lacaka1|2112677	Lacaka1	2112677	gene_4591	Induced during mycorrhization	VII	NA	NA	NA	NA	NA	NA	NA	NA	NA	NA	NA	NA	Unknown	Unknown	OG0001248	0.92809	1.57567	0.846347	11.7476	18.4751	15.9317	4.07678	1.09e-05
Lacaka1|2116184	Lacaka1	2116184	gene_9018	Induced during mycorrhization	VII	SSP	NA	EXPN	NA	NA	NA	NA	NA	NA	PF07249	Cerato-platanin	NA	CAZyme	Distantly related to plant expansins	OG0010154	0.410111	1.07411	0.220743	26.429	31.2293	71.7169	5.76046	0.000134335
Lacaka1|2116724	Lacaka1	2116724	gene_13093	Induced during mycorrhization	VII	NA	NA	NA	NA	NA	NA	NA	NA	NA	NA	NA	NA	Unknown	Unknown	OG0000462	18.9466	22.1859	19.5353	91.5019	134.388	112.561	2.58825	0.000851219
Lacaka1|2117093	Lacaka1	2117093	gene_11677	Induced during mycorrhization	VII	NA	NA	NA	NA	NA	S53	partial non-cannonical region	3.4.14.9	Tripeptidyl-peptidase I.	PF09286	Pro-kuma_activ	NA	Protease	Sedolisin (S53)	OG0000350	0.505131	0.392283	1.16534	7.14417	7.23614	9.47836	3.37808	0.000333654
Lacaka1|435949	Lacaka1	435949	gene_7505	Induced during mycorrhization	VII	NA	NA	NA	NA	NA	NA	NA	NA	NA	NA	NA	NA	Unknown	Unknown	OG0008730	9.59965	13.3198	14.5998	72.1785	78.2067	77.2636	2.86682	7.19e-07
Lacaka1|436206	Lacaka1	436206	gene_7504	Induced during mycorrhization	VII	NA	NA	NA	NA	NA	NA	NA	NA	NA	NA	NA	NA	Unknown	Unknown	OG0004199	5.96423	3.48121	3.39779	26.9089	37.5366	40.85	2.74403	0.00162276
Lacaka1|479225	Lacaka1	479225	gene_1595	Induced during mycorrhization	VII	NA	NA	NA	NA	NA	NA	NA	NA	NA	NA	NA	NA	Unknown	Unknown	OG0008759	531.595	621.852	649.957	3926.09	3874.8	3399.37	2.47433	9.91e-05
Lacaka1|514184	Lacaka1	514184	gene_6374	Induced during mycorrhization	VII	NA	NA	NA	NA	NA	NA	NA	NA	NA	NA	NA	NA	Unknown	Unknown	OG0008774	11.1851	12.5247	13.3477	70.497	78.063	51.1067	3.20067	1.12e-10
Lacaka1|518918	Lacaka1	518918	gene_6427	Induced during mycorrhization	VII	NA	NA	NA	NA	NA	NA	NA	NA	NA	PF12340,PF12359	DUF3638,DUF3645	NA	Unknown	Unknown	OG0010200	6.45301	6.79047	6.85064	44.9781	50.8081	47.774	2.67602	0.00012459
Lacaka1|691043	Lacaka1	691043	gene_15672	Induced during mycorrhization	VII	NA	NA	NA	NA	NA	NA	NA	NA	NA	NA	NA	NA	Unknown	Unknown	OG0004026	3.74477	3.75165	3.76403	83.7252	112.206	121.781	5.51831	1.02e-61
Lacaka1|880454	Lacaka1	880454	gene_8911	Induced during mycorrhization	VII	NA	NA	NA	NA	NA	NA	NA	NA	NA	PF00172	Zn_clus	NA	Transcription factor	Holds a zinc finger domain	OG0004301	35.0572	36.4398	31.2862	153.999	234.154	224.701	2.54242	0.0169241
Lacaka1|969758	Lacaka1	969758	gene_1300	Induced during mycorrhization	VII	NA	NA	NA	NA	NA	NA	NA	NA	NA	NA	NA	NA	Unknown	Unknown	OG0010244	12.5995	16.7442	11.4039	117.423	114.19	107.938	2.63185	2.18e-05
Lacaka1|969791	Lacaka1	969791	gene_1301	Induced during mycorrhization	VII	NA	NA	NA	NA	NA	NA	NA	NA	NA	PF05729	NACHT	NA	Other function	NACHT	OG0001089	0	0	0	0.503449	0.640396	0.6901	2.95027	0.000106425
Lacaka1|MSTRG.3614	Lacaka1	NA	MSTRG.3614	Induced during mycorrhization	VII	Secreted	NA	NA	NA	NA	NA	NA	NA	NA	NA	NA	NA	Unknown	Unknown	OG0011623	7.0264	7.39051	7.18795	58.0735	79.4809	88.5156	3.40075	1.7e-15
Lacaka1|MSTRG.4749	Lacaka1	NA	MSTRG.4749	Induced during mycorrhization	VII	NA	NA	NA	NA	NA	NA	NA	NA	NA	NA	NA	NA			OG0000845	0.281171	0.248306	0.351596	3.55559	4.34651	4.46559	3.9426	0.000388193
Lacaka1|MSTRG.5163	Lacaka1	NA	MSTRG.5163	Induced during mycorrhization	VII	NA	NA	NA	NA	NA	NA	NA	NA	NA	NA	NA	NA			OG0000845	0.17146	0.576703	0.225845	6.33415	4.85775	7.09171	4.25041	3.89e-07
Lacaka1|MSTRG.6061	Lacaka1	NA	MSTRG.6061	Induced during mycorrhization	VII	NA	NA	NA	NA	NA	NA	NA	NA	NA	NA	NA	NA	Unknown	Unknown	OG0011917	3.72808	0	3.76093	21.9072	24.8862	20.757	3.68714	0.02103
Lacaka1|MSTRG.8890	Lacaka1	NA	MSTRG.8890	Induced during mycorrhization	VII	NA	NA	NA	NA	NA	NA	NA	NA	NA	NA	NA	NA	Unknown	Unknown	OG0004733	5.04176	6.16285	5.85343	49.8632	55.8452	33.9686	2.98176	1.75e-06
Lacaka1|MSTRG.9636	Lacaka1	NA	MSTRG.9636	Induced during mycorrhization	VII	NA	NA	NA	NA	NA	NA	NA	NA	NA	NA	NA	NA	Unknown	Unknown	OG0001497	14.4706	16.7515	15.2409	115.458	132.498	118.223	2.62856	3.47e-09
Lacaka1|1205335	Lacaka1	1205335	gene_9141	Induced during mycorrhization	V	Secreted	NA	NA	NA	NA	S53	partial non-cannonical region	3.4.14.9	Tripeptidyl-peptidase I.	PF09286	Pro-kuma_activ	NA	Protease	Sedolisin (S53)	OG0000008	0.493406	0.328886	0.679495	9.12436	10.2822	17.4599	4.4239	3.55e-09
Lacaka1|1344326	Lacaka1	1344326	gene_9246	Induced during mycorrhization	V	Secreted	NA	NA	NA	NA	S53	non-cannonical region	3.4.14.9	Tripeptidyl-peptidase I.	PF09286	Pro-kuma_activ	NA	Protease	Sedolisin (S53)	OG0004793	22.0591	24.5822	26.0905	146.173	159.651	131.321	2.53834	1.28e-05
Lacaka1|1390006	Lacaka1	1390006	gene_12652	Induced during mycorrhization	V	Secreted	NA	NA	NA	NA	S53	cannonical region	3.4.14.9	Tripeptidyl-peptidase I.	PF09286,PF00082	Pro-kuma_activ,Peptidase_S8	NA	Protease	Sedolisin (S53)	OG0000108	1.41564	0.710105	0.665649	10.6138	10.7119	8.64231	3.4288	1.52e-07
Lacaka1|1639688	Lacaka1	1639688	gene_10409	Induced during mycorrhization	V	Secreted	NA	NA	NA	NA	NA	NA	1.14.14.1	Unspecific monooxygenase.	PF00067	p450	Secondary metabolites biosynthesis, transport and catabolism	Cytochrome p450		OG0000978	4.81775	5.13068	3.68199	272.337	400.525	599.298	6.67379	1.49e-33
Lacaka1|1791181	Lacaka1	1791181	gene_952	Induced during mycorrhization	V	NA	NA	NA	NA	NA	NA	NA	NA	NA	NA	NA	NA	Unknown	Unknown	OG0005235	1.68158	2.33391	2.31109	42.9195	20.1297	20.1079	3.54734	7.84e-08
Lacaka1|1799618	Lacaka1	1799618	gene_7865	Induced during mycorrhization	V	Secreted	NA	NA	NA	NA	S53	cannonical region	3.4.14.9	Tripeptidyl-peptidase I.	PF09286,PF00082	Pro-kuma_activ,Peptidase_S8	NA	Protease	Sedolisin (S53)	OG0000108	4.25525	4.82331	5.65259	31.5965	34.2553	30.3989	2.6847	0.00100896
Lacaka1|1799747	Lacaka1	1799747	gene_8927	Induced during mycorrhization	V	NA	NA	NA	NA	NA	NA	NA	NA	NA	PF13519,PF05879	VWA_2,RHD3	General function prediction only	Other function	RHD3	OG0002799	10.7033	10.826	11.6918	53.8098	74.7905	73.8775	2.53897	0.014616
Lacaka1|1801562	Lacaka1	1801562	gene_9132	Induced during mycorrhization	V	NA	NA	NA	NA	NA	S53	non-cannonical region	3.4.14.9	Tripeptidyl-peptidase I.	PF09286	Pro-kuma_activ	NA	Protease	Sedolisin (S53)	OG0000008	0.291689	1.20799	1.22909	8.50737	7.68646	8.90066	3.01738	0.00199835
Lacaka1|1802275	Lacaka1	1802275	gene_12502	Induced during mycorrhization	V	Secreted	NA	NA	NA	NA	S53	non-cannonical region	3.4.14.9	Tripeptidyl-peptidase I.	PF09286	Pro-kuma_activ	NA	Protease	Sedolisin (S53)	OG0000350	0.470245	0.199317	0.646086	11.2082	10.8802	11.4745	4.20914	6.45e-07
Lacaka1|1802430	Lacaka1	1802430	gene_9064	Induced during mycorrhization	V	NA	NA	NA	NA	NA	NA	NA	NA	NA	PF00067	p450	Secondary metabolites biosynthesis, transport and catabolism	Cytochrome p450		OG0000053	20.6066	15.8923	9.68146	75.7646	106.373	137.022	2.85276	0.00385873
Lacaka1|1805439	Lacaka1	1805439	gene_11007	Induced during mycorrhization	V	Secreted	NA	NA	NA	NA	NA	NA	3.4.16.6	Carboxypeptidase D.	PF00450	Peptidase_S10	Amino acid transport and metabolism ; Posttranslational modification, protein turnover, chaperones	Protease	Carboxypeptidase (S10)	OG0000220	0.641539	0.469087	0.561401	23.506	9.43816	6.81184	3.97419	0.00217646
Lacaka1|1806957	Lacaka1	1806957	gene_11949	Induced during mycorrhization	V	NA	NA	NA	NA	NA	NA	NA	NA	NA	PF07690,PF00083	MFS_1,Sugar_tr	General function prediction only	Transporter/Permease	Sugar transporter	OG0002892	25.5292	33.7879	28.5095	953.962	1149.74	1382.05	5.3327	9.83e-101
Lacaka1|1818425	Lacaka1	1818425	gene_8769	Induced during mycorrhization	V	Secreted	NA	NA	NA	NA	NA	NA	3.4.23.5	Cathepsin D.	PF00026,PF14543	Asp,TAXi_N	Posttranslational modification, protein turnover, chaperones	Protease	Pepsin (A1)	OG0009793	6.143	7.64873	6.04967	83.7994	91.2683	83.3695	3.6658	1.6e-37
Lacaka1|1819741	Lacaka1	1819741	gene_8571	Induced during mycorrhization	V	NA	NA	NA	NA	NA	NA	NA	NA	NA	PF11700,PF07690	ATG22,MFS_1	NA	Transporter/Permease	Amino acid or protein transporter	OG0001608	0.979862	0.508491	1.00223	189.682	192.137	227.88	8.00726	1.83e-234
Lacaka1|1819920	Lacaka1	1819920	gene_11043	Induced during mycorrhization	V	Secreted	NA	NA	NA	NA	NA	NA	3.4.14.9	Tripeptidyl-peptidase I.	PF09286	Pro-kuma_activ	NA			OG0000720	0.746917	1.11639	0.547232	10.1811	9.20397	9.41958	3.10738	0.00194266
Lacaka1|1822012	Lacaka1	1822012	gene_13447	Induced during mycorrhization	V	Secreted	NA	NA	NA	NA	S53	cannonical region	3.4.14.9	Tripeptidyl-peptidase I.	PF09286	Pro-kuma_activ	NA	Protease	Sedolisin (S53)	OG0001682	0	0.293893	0	3.00682	6.91384	9.06698	4.57912	0.00652657
Lacaka1|1847160	Lacaka1	1847160	gene_4155	Induced during mycorrhization	V	NA	NA	NA	NA	NA	NA	NA	1.14.14.1	Unspecific monooxygenase.	PF00067	p450	Lipid transport and metabolism ; Secondary metabolites biosynthesis, transport and catabolism	Cytochrome p450		OG0000514	2.32431	2.17754	2.27036	55.1784	57.7731	64.0789	3.96749	5.46e-20
Lacaka1|1879401	Lacaka1	1879401	gene_7158	Induced during mycorrhization	V	NA	NA	NA	NA	NA	NA	NA	NA	NA	PF00067	p450	Secondary metabolites biosynthesis, transport and catabolism	Cytochrome p450		OG0007014	9.67397	7.38432	7.66749	59.2658	57.5514	67.9966	2.81556	1.11e-05
Lacaka1|1880200	Lacaka1	1880200	gene_12446	Induced during mycorrhization	V	Secreted	NA	NA	NA	NA	S53	non-cannonical region	3.4.14.9	Tripeptidyl-peptidase I.	PF09286	Pro-kuma_activ	NA	Protease	Sedolisin (S53)	OG0000188	1.01023	0.438172	0.408594	9.63817	8.75761	7.91948	3.64091	5.73e-06
Lacaka1|1900987	Lacaka1	1900987	gene_15353	Induced during mycorrhization	V	NA	NA	NA	NA	NA	NA	NA	NA	NA	NA	NA	NA	Unknown	Unknown	OG0006642	21.8407	22.1183	20.1984	122.251	146.668	99.0028	2.45813	0.0348762
Lacaka1|1901837	Lacaka1	1901837	gene_11146	Induced during mycorrhization	V	NA	NA	NA	NA	NA	NA	NA	NA	NA	PF03079,PF07883,PF02311	ARD,Cupin_2,AraC_binding	Function unknown	Transporter/Permease	oligopeptide transporter	OG0000754	2.17373	2.47276	2.36593	57.6697	23.8417	24.0693	4.67241	5.29e-12
Lacaka1|1913891	Lacaka1	1913891	gene_15667	Induced during mycorrhization	V	NA	NA	NA	NA	NA	NA	NA	1.14.14.1	Unspecific monooxygenase.	PF00067	p450	Lipid transport and metabolism ; Secondary metabolites biosynthesis, transport and catabolism	Cytochrome p450		OG0000514	0.867434	0.53331	0.761875	48.8745	54.2889	57.9235	5.26952	2.26e-34
Lacaka1|1934065	Lacaka1	1934065	gene_4136	Induced during mycorrhization	V	NA	NA	NA	NA	NA	NA	NA	1.14.14.1	Unspecific monooxygenase.	PF00067	p450	Lipid transport and metabolism ; Secondary metabolites biosynthesis, transport and catabolism	Cytochrome p450		OG0000185	3.25999	3.7487	3.34274	61.0106	47.0342	52.5251	4.19251	3.87e-54
Lacaka1|1936088	Lacaka1	1936088	gene_7722	Induced during mycorrhization	V	Secreted	NA	NA	NA	NA	S53	partial cannonical region	3.4.14.9	Tripeptidyl-peptidase I.	PF09286,PF00082	Pro-kuma_activ,Peptidase_S8	NA	Protease	Sedolisin (S53)	OG0000010	1.06407	1.99925	1.53464	23.558	22.3096	18.0494	3.49365	1.73e-10
Lacaka1|1936488	Lacaka1	1936488	gene_11655	Induced during mycorrhization	V	Secreted	NA	NA	NA	NA	S53	non-cannonical region	3.4.14.9	Tripeptidyl-peptidase I.	PF09286	Pro-kuma_activ	NA	Protease	Sedolisin (S53)	OG0000350	18.4985	15.9148	16.1236	140.896	181.735	214.494	3.23946	2.15e-12
Lacaka1|1936807	Lacaka1	1936807	gene_9803	Induced during mycorrhization	V	NA	NA	NA	NA	NA	NA	NA	NA	NA	PF07690	MFS_1	Carbohydrate transport and metabolism	Transporter/Permease	Unknown transporter	OG0003669	4.95379	6.30616	4.84343	258.596	302.421	422.219	5.52267	3.12e-78
Lacaka1|1948828	Lacaka1	1948828	gene_9148	Induced during mycorrhization	V	NA	NA	NA	NA	NA	S53	partial non-cannonical region	3.4.14.9	Tripeptidyl-peptidase I.	PF09286	Pro-kuma_activ	NA	Protease	Sedolisin (S53)	OG0000555	2.04828	2.3974	2.21965	18.5019	17.2912	17.8612	2.68161	0.0258945
Lacaka1|1949741	Lacaka1	1949741	gene_9271	Induced during mycorrhization	V	NA	NA	NA	NA	NA	S53	non-cannonical region	3.4.14.9	Tripeptidyl-peptidase I.	PF09286	Pro-kuma_activ	NA	Protease	Sedolisin (S53)	OG0000052	0.541795	1.27905	0.822021	19.4321	16.7238	13.1027	3.9668	2.9e-08
Lacaka1|1949742	Lacaka1	1949742	gene_9272	Induced during mycorrhization	V	NA	NA	NA	NA	NA	S53	partial non-cannonical region	3.4.14.9	Tripeptidyl-peptidase I.	PF09286	Pro-kuma_activ	NA	Protease	Sedolisin (S53)	OG0000052	11.9212	10.0663	11.622	72.484	76.1408	60.5486	2.82687	3.47e-05
Lacaka1|1950743	Lacaka1	1950743	gene_11669	Induced during mycorrhization	V	NA	NA	NA	NA	NA	S53	non-cannonical region	3.4.14.9	Tripeptidyl-peptidase I.	NA	NA	NA	Protease	Sedolisin (S53)	OG0009993	0	0.701881	0.815112	15.7922	24.0271	26.925	4.5868	3.58e-18
Lacaka1|1952758	Lacaka1	1952758	gene_10775	Induced during mycorrhization	V	NA	NA	NA	NA	NA	NA	NA	NA	NA	PF00067	p450	Secondary metabolites biosynthesis, transport and catabolism	Cytochrome p450		OG0000124	3.97715	3.06547	4.71017	25.0704	35.591	29.6557	2.87551	0.00151681
Lacaka1|1955188	Lacaka1	1955188	gene_13820	Induced during mycorrhization	V	NA	NA	NA	NA	NA	S53	partial non-cannonical region	3.4.14.9	Tripeptidyl-peptidase I.	PF09286	Pro-kuma_activ	NA	Protease	Sedolisin (S53)	OG0000559	1.15535	1.43031	2.05562	17.8946	27.778	23.3857	3.67475	9.98e-11
Lacaka1|1955189	Lacaka1	1955189	gene_13822	Induced during mycorrhization	V	Secreted	NA	NA	NA	NA	NA	NA	3.4.14.9	Tripeptidyl-peptidase I.	PF09286	Pro-kuma_activ	NA			OG0000559	1.06123	0.592593	1.53818	22.1137	22.3685	20.5605	4.09712	1.16e-20
Lacaka1|1955566	Lacaka1	1955566	gene_12697	Induced during mycorrhization	V	Secreted	NA	NA	NA	NA	S53	cannonical region	3.4.14.9	Tripeptidyl-peptidase I.	PF09286	Pro-kuma_activ	NA	Protease	Sedolisin (S53)	OG0000369	2.84295	3.1014	2.12172	21.1357	25.5322	24.3553	2.9218	0.000391837
Lacaka1|1955567	Lacaka1	1955567	gene_12698	Induced during mycorrhization	V	Secreted	NA	NA	NA	NA	NA	NA	3.4.14.9	Tripeptidyl-peptidase I.	PF09286	Pro-kuma_activ	NA			OG0000369	2.93318	2.43437	2.58227	19.3141	18.2639	21.0227	2.78674	0.00171663
Lacaka1|1956936	Lacaka1	1956936	gene_15752	Induced during mycorrhization	V	Secreted	NA	NA	NA	NA	S53	non-cannonical region	3.4.14.9	Tripeptidyl-peptidase I.	PF09286	Pro-kuma_activ	NA	Protease	Sedolisin (S53)	OG0000008	1.45607	1.02365	1.13835	9.07167	9.53081	7.0875	3.0485	0.0261803
Lacaka1|1967987	Lacaka1	1967987	gene_11062	Induced during mycorrhization	V	Secreted	NA	NA	NA	NA	S53	partial non-cannonical region	3.4.14.9	Tripeptidyl-peptidase I.	PF09286	Pro-kuma_activ	NA	Protease	Sedolisin (S53)	OG0000698	2.19838	1.74442	1.70413	14.032	17.4464	16.7362	2.74714	0.0058205
Lacaka1|2026968	Lacaka1	2026968	gene_9233	Induced during mycorrhization	V	NA	NA	NA	NA	NA	S53	partial non-cannonical region	3.4.14.9	Tripeptidyl-peptidase I.	PF09286	Pro-kuma_activ	NA	Protease	Sedolisin (S53)	OG0000052	2.69531	2.7092	4.15208	82.3837	80.2327	79.0324	4.76396	9.69e-69
Lacaka1|2039951	Lacaka1	2039951	gene_12029	Induced during mycorrhization	V	Secreted	NA	NA	NA	NA	S53	partial non-cannonical region	3.4.14.9	Tripeptidyl-peptidase I.	PF09286	Pro-kuma_activ	NA	Protease	Sedolisin (S53)	OG0000219	2.27762	2.24444	1.95538	134.679	92.9318	141.463	5.583	1.2e-75
Lacaka1|2041168	Lacaka1	2041168	gene_10428	Induced during mycorrhization	V	Secreted	NA	NA	NA	NA	S53	non-cannonical region	3.4.14.9	Tripeptidyl-peptidase I.	PF09286	Pro-kuma_activ	NA	Protease	Sedolisin (S53)	OG0000110	0.938452	0.750746	0.162767	30.1364	39.1841	49.4382	6.01618	2.96e-31
Lacaka1|2053507	Lacaka1	2053507	gene_6421	Induced during mycorrhization	V	NA	NA	NA	NA	NA	S53	non-cannonical region	3.4.14.9	Tripeptidyl-peptidase I.	PF09286,PF00082	Pro-kuma_activ,Peptidase_S8	NA	Protease	Sedolisin (S53)	OG0001253	1.13623	1.52258	1.0956	54.9165	101.163	89.294	5.91143	3.57e-48
Lacaka1|2053915	Lacaka1	2053915	gene_6294	Induced during mycorrhization	V	Secreted	NA	NA	NA	NA	S53	non-cannonical region	3.4.14.9	Tripeptidyl-peptidase I.	PF09286	Pro-kuma_activ	NA	Protease	Sedolisin (S53)	OG0000781	1.98248	1.60264	2.21475	32.2314	23.098	21.378	3.49899	1.98e-08
Lacaka1|2054294	Lacaka1	2054294	gene_8923	Induced during mycorrhization	V	Secreted	NA	NA	NA	NA	S53	non-cannonical region	3.4.14.9	Tripeptidyl-peptidase I.	PF09286	Pro-kuma_activ	NA	Protease	Sedolisin (S53)	OG0000356	0.576732	0.357098	0.757114	18.9717	12.4201	17.3516	4.24707	1.42e-11
Lacaka1|2055017	Lacaka1	2055017	gene_9269	Induced during mycorrhization	V	Secreted	NA	NA	NA	NA	NA	NA	3.4.14.9	Tripeptidyl-peptidase I.	PF09286	Pro-kuma_activ	NA			OG0000052	2.22762	2.23146	2.31278	16.8005	17.1261	15.9196	2.68911	0.0465036
Lacaka1|2055108	Lacaka1	2055108	gene_9420	Induced during mycorrhization	V	NA	NA	NA	NA	NA	S53	partial non-cannonical region	3.4.14.9	Tripeptidyl-peptidase I.	PF09286	Pro-kuma_activ	NA	Protease	Sedolisin (S53)	OG0000126	1.11882	1.1894	0.43769	13.535	17.9194	19.6927	3.63143	1.03e-09
Lacaka1|2055164	Lacaka1	2055164	gene_11651	Induced during mycorrhization	V	Secreted	NA	NA	NA	NA	S53	non-cannonical region	3.4.14.9	Tripeptidyl-peptidase I.	PF09286	Pro-kuma_activ	NA	Protease	Sedolisin (S53)	OG0000350	1.79682	1.66044	1.66549	23.2552	29.1554	32.5141	3.9119	1.07e-15
Lacaka1|207610	Lacaka1	207610	gene_4156	Induced during mycorrhization	V	NA	NA	NA	NA	NA	NA	NA	1.14.14.1	Unspecific monooxygenase.	PF00067	p450	Lipid transport and metabolism ; Secondary metabolites biosynthesis, transport and catabolism	Cytochrome p450		OG0000514	0.161276	0.210506	0	31.3306	30.3075	35.5587	6.8918	3.1e-09
Lacaka1|2090887	Lacaka1	2090887	gene_9120	Induced during mycorrhization	V	Secreted	NA	NA	NA	NA	S53	non-cannonical region	3.4.14.9	Tripeptidyl-peptidase I.	PF09286	Pro-kuma_activ	NA	Protease	Sedolisin (S53)	OG0000008	0.377741	0.239886	0.163931	5.8293	8.23814	8.15873	4.51934	2.15e-07
Lacaka1|2093376	Lacaka1	2093376	gene_10406	Induced during mycorrhization	V	Secreted	NA	NA	NA	NA	NA	NA	1.14.14.1	Unspecific monooxygenase.	PF00067	p450	Secondary metabolites biosynthesis, transport and catabolism	Cytochrome p450		OG0000978	2.19425	1.66373	1.46443	14.7514	25.4942	16.3193	2.98578	0.00247764
Lacaka1|2106557	Lacaka1	2106557	gene_9807	Induced during mycorrhization	V	Secreted	NA	NA	NA	NA	S53	partial non-cannonical region	3.4.14.9	Tripeptidyl-peptidase I.	PF09286	Pro-kuma_activ	NA	Protease	Sedolisin (S53)	OG0010132	9.26742	12.3876	14.298	85.9317	94.542	107.073	2.87804	2.25e-08
Lacaka1|2106558	Lacaka1	2106558	gene_9808	Induced during mycorrhization	V	Secreted	NA	NA	NA	NA	NA	NA	3.4.14.9	Tripeptidyl-peptidase I.	PF09286	Pro-kuma_activ	NA			OG0000455	2.75154	3.39215	2.98477	61.8805	89.2835	77.2913	4.50688	5.31e-44
Lacaka1|2118383	Lacaka1	2118383	gene_10597	Induced during mycorrhization	V	Secreted	NA	NA	NA	NA	S53	non-cannonical region	3.4.14.9	Tripeptidyl-peptidase I.	PF09286	Pro-kuma_activ	NA	Protease	Sedolisin (S53)	OG0000085	1.60883	1.40487	1.25703	12.0691	14.4436	12.0317	3.60836	2.31e-05
Lacaka1|267799	Lacaka1	267799	gene_10602	Induced during mycorrhization	V	Secreted	NA	NA	NA	NA	S53	partial non-cannonical region	3.4.14.9	Tripeptidyl-peptidase I.	PF09286	Pro-kuma_activ	NA	Protease	Sedolisin (S53)	OG0000085	0.207577	0.141069	0	4.80002	5.11684	5.94611	4.80034	0.0210619
Lacaka1|268070	Lacaka1	268070	gene_10609	Induced during mycorrhization	V	Secreted	NA	NA	NA	NA	S53	partial non-cannonical region	3.4.14.9	Tripeptidyl-peptidase I.	PF09286	Pro-kuma_activ	NA	Protease	Sedolisin (S53)	OG0000085	0.731425	0.130422	0.166701	4.53117	5.79599	6.80495	4.03141	0.0243804
Lacaka1|339272	Lacaka1	339272	gene_4797	Induced during mycorrhization	V	Secreted	NA	NA	NA	NA	S53	cannonical region	3.4.14.9	Tripeptidyl-peptidase I.	PF09286,PF00082	Pro-kuma_activ,Peptidase_S8	NA	Protease	Sedolisin (S53)	OG0000108	1.46727	1.11945	1.5834	10.9115	16.1918	18.7584	3.13403	6.17e-06
Lacaka1|388294	Lacaka1	388294	gene_13875	Induced during mycorrhization	V	Secreted	NA	NA	NA	NA	S53	partial cannonical region	3.4.14.9	Tripeptidyl-peptidase I.	PF09286	Pro-kuma_activ	NA	Protease	Sedolisin (S53)	OG0003853	0.312238	0	0.139128	2.86157	4.12507	7.04344	4.70872	0.0345276
Lacaka1|490149	Lacaka1	490149	gene_1670	Induced during mycorrhization	V	Secreted	NA	GH16	Glucan	NA	NA	NA	NA	NA	NA	NA	NA	CAZyme	Glycoside Hydrolase	OG0008765	18.3662	14.172	13.7241	152.699	185.726	269.198	3.70153	2.15e-12
Lacaka1|690805	Lacaka1	690805	gene_15669	Induced during mycorrhization	V	NA	NA	NA	NA	NA	NA	NA	1.14.14.1	Unspecific monooxygenase.	PF00067	p450	Lipid transport and metabolism ; Secondary metabolites biosynthesis, transport and catabolism	Cytochrome p450		OG0000514	0.512077	0	0.455391	39.6579	50.9118	60.0019	6.84023	2.19e-45
Lacaka1|712193	Lacaka1	712193	gene_13240	Induced during mycorrhization	V	Secreted	NA	NA	NA	NA	NA	NA	3.4.23.5	Cathepsin D.	PF00026,PF14543	Asp,TAXi_N	Posttranslational modification, protein turnover, chaperones	Protease	Pepsin (A1)	OG0003962	2.21477	1.31179	1.72138	27.5724	14.794	15.2168	2.95354	0.00101692
Lacaka1|785694	Lacaka1	785694	gene_6135	Induced during mycorrhization	V	Secreted	NA	NA	NA	NA	S53	non-cannonical region	3.4.14.9	Tripeptidyl-peptidase I.	PF09286	Pro-kuma_activ	NA	Protease	Sedolisin (S53)	OG0000108	3.31088	4.08592	3.76247	25.9628	24.9718	25.3982	2.80806	5.32e-06
Lacaka1|MSTRG.5166	Lacaka1	NA	MSTRG.5166	Induced during mycorrhization	V	Secreted	NA	NA	NA	NA	NA	NA	NA	NA	PF09286	Pro-kuma_activ	NA			OG0009054	0.396628	0.173612	0.201878	3.77375	3.52196	3.33944	3.76703	0.000861089
Lacaka1|MSTRG.6058	Lacaka1	NA	MSTRG.6058	Induced during mycorrhization	V	NA	NA	NA	NA	NA	NA	NA	NA	NA	PF09286	Pro-kuma_activ	NA			OG0001253	1.24819	1.84032	1.52514	16.0238	26.2078	23.9988	3.48494	1.26e-08
Lacaka1|129338	Lacaka1	129338	gene_11158	Induced during mycorrhization	VI	Secreted	NA	NA	NA	NA	NA	NA	NA	NA	PF12222	PNGaseA	NA	Other function	PNGaseA	OG0000024	2.17124	2.38757	2.54369	18.2319	14.7363	15.8224	2.86005	1.97e-05
Lacaka1|1800555	Lacaka1	1800555	gene_5432	Induced during mycorrhization	VI	NA	NA	NA	NA	NA	NA	NA	NA	NA	PF00860	Xan_ur_permease	Nucleotide transport and metabolism	Transporter/Permease	Unknown transporter	OG0005582	8.86021	8.4923	10.395	103.009	74.7351	95.7474	3.1077	3.28e-20
Lacaka1|1819943	Lacaka1	1819943	gene_11163	Induced during mycorrhization	VI	Secreted	NA	NA	NA	NA	NA	NA	NA	NA	PF12222	PNGaseA	NA	Other function	PNGaseA	OG0000024	4.87319	4.84279	4.14397	43.3575	52.8382	52.6044	3.49422	6.69e-23
Lacaka1|1834014	Lacaka1	1834014	gene_1201	Induced during mycorrhization	VI	SSP	NA	NA	NA	NA	NA	NA	NA	NA	PF05572,PF13688	Peptidase_M43,Reprolysin_5	NA	Protease	Cytophagalysin (M43)	OG0006185	4.3251	3.36774	3.36603	24.066	21.4432	14.7065	2.73964	0.0108355
Lacaka1|1936861	Lacaka1	1936861	gene_10443	Induced during mycorrhization	VI	Secreted	NA	NA	NA	NA	NA	NA	NA	NA	PF12222	PNGaseA	NA	Other function	PNGaseA	OG0000024	1.1663	0.743586	0.262647	22.4136	26.7593	22.3981	4.86139	5.43e-17
Lacaka1|2037808	Lacaka1	2037808	gene_10088	Induced during mycorrhization	VI	Secreted	NA	NA	NA	NA	NA	NA	NA	NA	PF12222	PNGaseA	NA	Other function	PNGaseA	OG0000024	0.427295	0.611185	0.307873	33.7765	41.4457	40.3785	6.07223	3.68e-46
Lacaka1|2093620	Lacaka1	2093620	gene_11180	Induced during mycorrhization	VI	Secreted	NA	NA	NA	NA	NA	NA	NA	NA	PF12222	PNGaseA	NA	Other function	PNGaseA	OG0004067	1.86909	1.52865	1.40508	11.008	11.4085	15.556	2.99967	7.57e-06
Lacaka1|2114649	Lacaka1	2114649	gene_6300	Induced during mycorrhization	VI	Secreted	NA	NA	NA	NA	NA	NA	3.4.24.-	Metalloendopeptidases.	PF02128,PF07504	Peptidase_M36,FTP	NA	Protease	Fungalysin (M36)	OG0002152	0	0.329087	0.252167	27.1358	29.5043	39.1557	6.83904	1.12e-53
Lacaka1|1352862	Lacaka1	1352862	gene_9053	Induced during mycorrhization	I	NA	NA	NA	NA	NA	NA	NA	NA	NA	NA	NA	NA	Unknown	Unknown	OG0013821	3.6408	3.52726	3.26266	33.5671	35.8465	24.9939	2.78515	0.0187969
Lacaka1|1620222	Lacaka1	1620222	gene_10718	Induced during mycorrhization	I	NA	NA	NA	NA	NA	NA	NA	NA	NA	NA	NA	NA	Unknown	Unknown	OG0013889	0	32.1031	30.2642	426.535	498.717	0	3.90456	1.18e-43
Lacaka1|1815074	Lacaka1	1815074	gene_3701	Induced during mycorrhization	I	NA	NA	NA	NA	NA	NA	NA	NA	NA	NA	NA	NA	Unknown	Unknown	OG0011372	0	0	0	0	26.8581	19.0629	7.4635	0.000237112
Lacaka1|1818101	Lacaka1	1818101	gene_9153	Induced during mycorrhization	I	NA	NA	NA	NA	NA	NA	NA	NA	NA	NA	NA	NA	Unknown	Unknown	OG0014034	0.760852	0.388303	0.654189	11.5178	12.1614	14.7317	4.01338	5.05e-07
Lacaka1|1820737	Lacaka1	1820737	gene_12205	Induced during mycorrhization	I	NA	NA	NA	NA	NA	NA	NA	NA	NA	NA	NA	NA	Unknown	Unknown	OG0009822	5.23763	7.27614	7.36145	51.6485	44.7046	34.566	2.71375	0.00498582
Lacaka1|1850042	Lacaka1	1850042	gene_3721	Induced during mycorrhization	I	NA	NA	NA	NA	NA	NA	NA	NA	NA	NA	NA	NA	Unknown	Unknown	OG0014172	2.18052	5.28726	1.20127	26.2968	34.8213	29.6815	3.3641	0.00843809
Lacaka1|1854458	Lacaka1	1854458	gene_4341	Induced during mycorrhization	I	NA	NA	NA	NA	NA	NA	NA	NA	NA	NA	NA	NA	Unknown	Unknown	OG0014183	1.31594	0.943248	1.18495	15.0019	18.662	16.7002	3.65246	0.0207511
Lacaka1|1873980	Lacaka1	1873980	gene_7673	Induced during mycorrhization	I	NA	NA	NA	NA	NA	NA	NA	NA	NA	NA	NA	NA	Unknown	Unknown	OG0014237	8.42943	7.5332	7.697	59.7218	75.5581	95.4184	3.20043	0.021653
Lacaka1|188610	Lacaka1	188610	gene_11729	Induced during mycorrhization	I	NA	NA	NA	NA	NA	NA	NA	NA	NA	NA	NA	NA	Unknown	Unknown	OG0014272	1.22707	2.66181	2.31126	33.8602	28.2318	29.152	3.92123	2.67e-13
Lacaka1|1943263	Lacaka1	1943263	gene_5160	Induced during mycorrhization	I	NA	NA	NA	NA	NA	NA	NA	NA	NA	NA	NA	NA	Unknown	Unknown	OG0014357	3.23969	4.76781	6.0904	45.9818	21.9649	21.692	5.32543	3.45e-10
Lacaka1|201837	Lacaka1	201837	gene_4086	Induced during mycorrhization	I	NA	NA	NA	NA	NA	NA	NA	NA	NA	NA	NA	NA	Unknown	Unknown	OG0014453	18.7923	20.8757	18.5981	303.277	300.508	408.751	4.52404	4.02e-55
Lacaka1|2103994	Lacaka1	2103994	gene_5664	Induced during mycorrhization	I	NA	NA	NA	NA	NA	NA	NA	NA	NA	NA	NA	NA	Unknown	Unknown	OG0014489	1.94646	1.43149	0.703556	26.2026	59.3308	3.23959	4.24915	9.85e-15
Lacaka1|MSTRG.11572	Lacaka1	NA	MSTRG.11572	Induced during mycorrhization	I	NA	NA	NA	NA	NA	NA	NA	NA	NA	NA	NA	NA	Unknown	Unknown	OG0014724	1.31933	2.20794	1.19044	17.8816	11.5628	11.1432	2.95493	0.0293291
Lacaka1|MSTRG.3249	Lacaka1	NA	MSTRG.3249	Induced during mycorrhization	I	NA	NA	NA	NA	NA	NA	NA	NA	NA	NA	NA	NA	Unknown	Unknown	OG0014757	0	2.57828	2.17541	0	0	0	3.7352	3.15e-07
Lacaka1|MSTRG.9858	Lacaka1	NA	MSTRG.9858	Induced during mycorrhization	I	NA	NA	NA	NA	NA	NA	NA	NA	NA	NA	NA	NA	Unknown	Unknown	OG0014879	0.619553	0.604644	0.405293	75.3583	82.2709	96.7617	7.34537	3.02e-52
Lacaka1|1463114	Lacaka1	1463114	gene_9567	Induced during mycorrhization	II	NA	NA	CBM12	NA	NA	NA	NA	NA	NA	NA	NA	NA	CAZyme	Holds a CBM domain	OG0002541	20.3619	21.3168	16.8064	83.7097	62.5182	42.6487	3.58742	7.09e-06
Lacaka1|1540849	Lacaka1	1540849	gene_2973	Induced during mycorrhization	II	NA	NA	NA	NA	NA	NA	NA	NA	NA	NA	NA	NA	Unknown	Unknown	OG0001475	155.864	172.503	156.394	1057.25	1267.2	989.964	2.54443	0.000153579
Lacaka1|176290	Lacaka1	176290	gene_11521	Induced during mycorrhization	II	NA	NA	NA	NA	NA	NA	NA	NA	NA	NA	NA	NA	Unknown	Unknown	OG0001504	0	0	4.34708	14.2193	14.3563	15.057	3.90306	0.000407833
Lacaka1|1785190	Lacaka1	1785190	gene_8270	Induced during mycorrhization	II	NA	NA	NA	NA	NA	NA	NA	NA	NA	NA	NA	NA	Unknown	Unknown	OG0000478	5.9707	7.64028	7.15805	64.0477	107.722	86.6637	4.30274	8.99e-21
Lacaka1|1805749	Lacaka1	1805749	gene_12364	Induced during mycorrhization	II	NA	NA	NA	NA	NA	NA	NA	NA	NA	NA	NA	NA	Unknown	Unknown	OG0009721	5.34743	4.09087	5.83648	89.7883	97.553	116.24	3.97497	4.41e-13
Lacaka1|1814730	Lacaka1	1814730	gene_4127	Induced during mycorrhization	II	NA	NA	NA	NA	NA	NA	NA	2.4.2.30	NAD(+) ADP-ribosyltransferase.	PF00023,PF12796,PF13857,PF13637,PF13606,PF16378	Ank,Ank_2,Ank_5,Ank_4,Ank_3,DUF4988	Cell wall/membrane/envelope biogenesis	Other function	ribosyltransferase	OG0001641	3.85426	2.2209	2.61625	38.1701	44.4612	40.2819	3.70984	5.55e-18
Lacaka1|1815096	Lacaka1	1815096	gene_3732	Induced during mycorrhization	II	NA	NA	NA	NA	NA	NA	NA	NA	NA	NA	NA	NA	Unknown	Unknown	OG0005763	7.55697	8.33117	9.6217	126.455	86.7768	56.6549	2.88213	0.00377611
Lacaka1|1817982	Lacaka1	1817982	gene_7758	Induced during mycorrhization	II	SSP	NA	AA3_2	PartialPCWdegradation	NA	NA	NA	NA	NA	PF00732	GMC_oxred_N	General function prediction only	CAZyme	GMC oxidoreductase	OG0000343	2.59204	3.82536	3.43913	25.7385	41.2842	22.7343	3.60322	3.82e-08
Lacaka1|1819096	Lacaka1	1819096	gene_8505	Induced during mycorrhization	II	NA	NA	NA	NA	NA	NA	NA	3.4.14.9	Tripeptidyl-peptidase I.	NA	NA	NA			OG0014061	0.132919	0.544869	0.247257	8.98887	12.3698	10.3454	4.79283	2.81e-06
Lacaka1|1820355	Lacaka1	1820355	gene_12516	Induced during mycorrhization	II	NA	NA	NA	NA	NA	NA	NA	NA	NA	NA	NA	NA	Unknown	Unknown	OG0011436	2.83379	2.44353	3.57449	38.9833	38.9647	56.8001	3.23674	1.68e-06
Lacaka1|1831391	Lacaka1	1831391	gene_1807	Induced during mycorrhization	II	NA	NA	NA	NA	NA	NA	NA	NA	NA	NA	NA	NA	Unknown	Unknown	OG0003062	1.7356	2.28716	2.74826	26.5967	20.3315	17.9282	3.00823	0.00399515
Lacaka1|1846706	Lacaka1	1846706	gene_4085	Induced during mycorrhization	II	NA	NA	NA	NA	NA	NA	NA	NA	NA	NA	NA	NA	Unknown	Unknown	OG0009885	116.66	105.565	101.714	1039.39	966.849	1021.43	3.03476	2.47e-23
Lacaka1|1852708	Lacaka1	1852708	gene_6507	Induced during mycorrhization	II	NA	NA	CBM13	Hemicellulose	NA	NA	NA	NA	NA	PF14200	RicinB_lectin_2	NA	CAZyme	Holds a CBM domain	OG0006607	5.17255	0	0	11.3967	16.8185	15.9657	5.57586	4.08e-16
Lacaka1|1873990	Lacaka1	1873990	gene_7674	Induced during mycorrhization	II	NA	NA	NA	NA	NA	NA	NA	NA	NA	PF00240,PF11976,PF14560	ubiquitin,Rad60-SLD,Ubiquitin_2	General function prediction only ; Posttranslational modification, protein turnover, chaperones	Other function	Ubiquitin	OG0009922	2.00638	2.10971	1.75753	21.1749	24.0351	30.1984	3.95061	2.9e-10
Lacaka1|1876143	Lacaka1	1876143	gene_7728	Induced during mycorrhization	II	NA	NA	NA	NA	NA	NA	NA	NA	NA	NA	NA	NA	Unknown	Unknown	OG0001821	0.935925	1.56621	0.906393	16.2275	18.0667	15.1522	4.04882	7.38e-10
Lacaka1|1878395	Lacaka1	1878395	gene_8400	Induced during mycorrhization	II	Secreted	NA	NA	NA	NA	NA	NA	NA	NA	NA	NA	NA	Unknown	Unknown	OG0003404	84.455	84.3011	96.666	895.074	823.059	753.9	3.066	3.32e-21
Lacaka1|188726	Lacaka1	188726	gene_11730	Induced during mycorrhization	II	NA	NA	NA	NA	20c3__4Q56 H-type lectin	NA	NA	NA	NA	PF09458	H_lectin	NA	Lectin	H-type lectin	OG0000228	3.04353	4.08302	6.45987	67.111	68.8522	50.2618	3.7321	5.29e-12
Lacaka1|1898750	Lacaka1	1898750	gene_12507	Induced during mycorrhization	II	NA	NA	NA	NA	NA	NA	NA	NA	NA	NA	NA	NA	Unknown	Unknown	OG0007147	6.0855	8.6319	8.37818	117.328	124.253	108.997	3.89798	2.64e-43
Lacaka1|1902972	Lacaka1	1902972	gene_11481	Induced during mycorrhization	II	NA	NA	NA	NA	NA	NA	NA	NA	NA	NA	NA	NA	Unknown	Unknown	OG0001877	1.51601	2.52486	1.19816	47.8663	45.5615	34.418	4.76678	6.42e-26
Lacaka1|192884	Lacaka1	192884	gene_14230	Induced during mycorrhization	II	NA	NA	NA	NA	20c3__4Q56 H-type lectin	NA	NA	NA	NA	PF09458	H_lectin	NA	Lectin	H-type lectin	OG0003549	4.79492	6.50569	6.27912	86.5037	110.345	65.2826	4.34182	1.74e-15
Lacaka1|1941139	Lacaka1	1941139	gene_1294	Induced during mycorrhization	II	NA	NA	NA	NA	NA	NA	NA	NA	NA	PF00023,PF13637,PF12796,PF13606,PF13857	Ank,Ank_4,Ank_2,Ank_3,Ank_5	Cell wall/membrane/envelope biogenesis	Unknown	Unknown	OG0011566	45.6046	42.7088	43.8043	251.583	266.214	234.162	2.37474	0.011387
Lacaka1|1941314	Lacaka1	1941314	gene_2401	Induced during mycorrhization	II	NA	NA	NA	NA	NA	NA	NA	NA	NA	NA	NA	NA	Unknown	Unknown	OG0003702	43.7416	30.3466	31.8491	946.791	1066.92	1350.91	4.39155	2.95e-37
Lacaka1|1945196	Lacaka1	1945196	gene_4655	Induced during mycorrhization	II	NA	NA	NA	NA	NA	NA	NA	NA	NA	NA	NA	NA	Unknown	Unknown	OG0014374	0	0	0	2.96626	42.3471	32.556	6.42426	2e-16
Lacaka1|1945208	Lacaka1	1945208	gene_4673	Induced during mycorrhization	II	NA	NA	NA	NA	NA	NA	NA	NA	NA	NA	NA	NA	Unknown	Unknown	OG0011589	0.44113	0	1.36437	2839.18	10489.7	10222.6	13.2442	1.26e-41
Lacaka1|1952439	Lacaka1	1952439	gene_11073	Induced during mycorrhization	II	NA	NA	NA	NA	NA	NA	NA	NA	NA	NA	NA	NA	Unknown	Unknown	OG0010045	21.0479	15.9002	18.1376	56.7633	43.5277	42.8363	2.9387	0.000184552
Lacaka1|1957581	Lacaka1	1957581	gene_13769	Induced during mycorrhization	II	NA	NA	NA	NA	NA	NA	NA	NA	NA	NA	NA	Replication, recombination and repair	Unknown	Unknown	OG0010053	10.517	14.7109	15.4607	91.7254	87.9354	74.9482	2.62773	0.00199227
Lacaka1|295652	Lacaka1	295652	gene_3761	Induced during mycorrhization	II	NA	NA	NA	NA	NA	NA	NA	NA	NA	NA	NA	NA	Unknown	Unknown	OG0001284	3.9337	3.28281	4.52983	85.5396	75.7444	45.3861	3.81353	2.15e-11
Lacaka1|397197	Lacaka1	397197	gene_4212	Induced during mycorrhization	II	NA	NA	NA	NA	NA	NA	NA	NA	NA	NA	NA	NA	Unknown	Unknown	OG0010180	2.219	2.48827	2.47207	13.7509	22.2343	14.4076	3.09729	0.000487664
Lacaka1|417040	Lacaka1	417040	gene_4385	Induced during mycorrhization	II	NA	NA	NA	NA	NA	NA	NA	NA	NA	NA	NA	NA	Unknown	Unknown	OG0008718	6.87091	10.1284	6.34417	100.638	120.316	113.015	3.8853	4.64e-30
Lacaka1|417101	Lacaka1	417101	gene_4386	Induced during mycorrhization	II	NA	NA	NA	NA	NA	NA	NA	NA	NA	NA	NA	NA	Unknown	Unknown	OG0004188	3.12974	4.46276	3.50632	44.1986	44.6834	38.0931	3.40362	7.18e-11
Lacaka1|554261	Lacaka1	554261	gene_13083	Induced during mycorrhization	II	NA	NA	NA	NA	NA	NA	NA	NA	NA	NA	NA	NA	Unknown	Unknown	OG0010202	3.638	2.19418	2.54954	19.8992	21.7457	20.0003	2.8911	0.00313099
Lacaka1|588750	Lacaka1	588750	gene_7979	Induced during mycorrhization	II	NA	NA	NA	NA	NA	NA	NA	NA	NA	NA	NA	General function prediction only	Unknown	Unknown	OG0004248	8.93636	9.41841	9.71608	59.9443	61.9537	53.8996	2.51377	0.00749999
Lacaka1|660762	Lacaka1	660762	gene_7047	Induced during mycorrhization	II	NA	NA	NA	NA	NA	NA	NA	NA	NA	NA	NA	NA	Unknown	Unknown	OG0000836	12.9141	13.7432	14.0575	169.245	132.571	114.01	3.2946	3.05e-13
Lacaka1|705065	Lacaka1	705065	gene_7920	Induced during mycorrhization	II	NA	NA	NA	NA	NA	NA	NA	NA	NA	NA	NA	NA	Unknown	Unknown	OG0001292	0.609944	0.236697	0	13.189	10.329	7.84339	4.99613	2.67e-12
Lacaka1|869039	Lacaka1	869039	gene_7814	Induced during mycorrhization	II	NA	NA	NA	NA	NA	NA	NA	NA	NA	NA	NA	NA	Unknown	Unknown	OG0004299	6.64963	6.78671	6.01695	121.478	109.872	103.88	3.94811	6.15e-33
Lacaka1|887714	Lacaka1	887714	gene_16043	Induced during mycorrhization	II	SSP	NA	NA	NA	NA	NA	NA	NA	NA	NA	NA	NA	Unknown	Unknown	OG0011809	0.241201	0	0.30907	33.6045	15.4821	11.9966	7.02233	1.56e-06
Lacaka1|MSTRG.3465	Lacaka1	NA	MSTRG.3465	Induced during mycorrhization	II	NA	NA	NA	NA	NA	NA	NA	NA	NA	PF17109	Goodbye	NA	Other function	Holds a Goodbye domain	OG0014759	1.23363	1.98082	1.80775	17.8212	22.1114	14.151	3.86723	2.65e-06
Lacaka1|MSTRG.4252	Lacaka1	NA	MSTRG.4252	Induced during mycorrhization	II	NA	NA	NA	NA	NA	NA	NA	NA	NA	NA	NA	NA	Unknown	Unknown	OG0014766	31.957	31.9333	28.0404	216.01	298.014	203.247	2.74203	7.47e-05
Lacaka1|MSTRG.7453	Lacaka1	NA	MSTRG.7453	Induced during mycorrhization	II	NA	NA	NA	NA	NA	NA	NA	NA	NA	NA	NA	NA	Unknown	Unknown	OG0009851	2.38966	2.70915	2.6338	21.2531	19.6603	16.8418	2.80272	0.0207511
Lacaka1|MSTRG.8243	Lacaka1	NA	MSTRG.8243	Induced during mycorrhization	II	NA	NA	NA	NA	NA	NA	NA	NA	NA	NA	NA	NA	Unknown	Unknown	OG0014833	0.262087	0.126371	0.182127	4.57414	5.71182	9.35915	4.91234	0.000166978
Lacaka1|MSTRG.888	Lacaka1	NA	MSTRG.888	Induced during mycorrhization	II	NA	NA	NA	NA	NA	NA	NA	NA	NA	NA	NA	NA	Unknown	Unknown	OG0000841	1.47891	1.46855	1.34269	9.28005	10.7188	8.3879	3.12181	2e-05
Lacaka1|MSTRG.8981	Lacaka1	NA	MSTRG.8981	Induced during mycorrhization	II	NA	NA	NA	NA	NA	NA	NA	NA	NA	NA	NA	NA	Unknown	Unknown	OG0009080	2.86578	2.78593	3.55902	22.2645	18.2781	19.8431	2.71268	0.0333107
Lacaka1|MSTRG.9582	Lacaka1	NA	MSTRG.9582	Induced during mycorrhization	II	NA	NA	NA	NA	NA	NA	NA	NA	NA	NA	NA	NA	Protease	Pepsin (A1)	OG0001562	0.759258	0.411479	0.617559	14.2486	18.7322	13.7902	4.03635	0.0416662
Lacaka1|MSTRG.11931	Lacaka1	NA	MSTRG.11931	Induced during mycorrhization	NA	NA	NA	NA	NA	NA	NA	NA	NA	NA	NA	NA	NA	Unknown	Unknown	NA	2.29471	1.69666	2.2258	20.1268	14.0922	13.0724	2.92593	0.0220504
Lacaka1|MSTRG.12654	Lacaka1	NA	MSTRG.12654	Induced during mycorrhization	NA	NA	NA	NA	NA	NA	NA	NA	NA	NA	NA	NA	NA	Unknown	Unknown	NA	4.50122	3.87893	3.35854	114.999	121.549	194.745	4.95077	1.87e-17
Lacaka1|MSTRG.2054	Lacaka1	NA	MSTRG.2054	Induced during mycorrhization	NA	NA	NA	NA	NA	NA	NA	NA	NA	NA	NA	NA	NA	Unknown	Unknown	NA	0	0.234052	0	9.37932	9.61601	9.09794	8.9028	3.86e-07
Lacaka1|MSTRG.2169	Lacaka1	NA	MSTRG.2169	Induced during mycorrhization	NA	NA	NA	NA	NA	NA	NA	NA	NA	NA	NA	NA	NA	Unknown	Unknown	NA	7.19714	6.41723	6.00166	43.8237	0	0	2.48815	0.0123854
Lacaka1|MSTRG.5671	Lacaka1	NA	MSTRG.5671	Induced during mycorrhization	NA	NA	NA	NA	NA	NA	NA	NA	NA	NA	NA	NA	NA	Unknown	Unknown	NA	0.560703	0.949024	0.706085	10.4995	12.522	15.3834	4.14282	5.6e-06
Lacaka1|MSTRG.6015	Lacaka1	NA	MSTRG.6015	Induced during mycorrhization	NA	NA	NA	NA	NA	NA	NA	NA	NA	NA	NA	NA	NA	Unknown	Unknown	NA	1.79068	1.11085	1.53683	20.7405	16.2471	17.5853	4.32695	2.07e-32
Lacaka1|MSTRG.6019	Lacaka1	NA	MSTRG.6019	Induced during mycorrhization	NA	NA	NA	NA	NA	NA	NA	NA	NA	NA	NA	NA	NA	Unknown	Unknown	NA	0.908264	2.33301	1.89029	15.0172	11.6277	20.9893	3.00759	0.00269304
Lacaka1|MSTRG.6040	Lacaka1	NA	MSTRG.6040	Induced during mycorrhization	NA	NA	NA	NA	NA	NA	NA	NA	NA	NA	NA	NA	NA	Unknown	Unknown	NA	5.80079	6.46258	6.35098	33.5766	38.0423	30.1671	2.62477	0.0491646
Lacaka1|MSTRG.7038	Lacaka1	NA	MSTRG.7038	Induced during mycorrhization	NA	NA	NA	NA	NA	NA	NA	NA	NA	NA	NA	NA	NA	Unknown	Unknown	NA	2.51165	2.22808	2.38607	20.193	23.7752	19.7908	3.14732	1e-10
Lacaka1|MSTRG.7286	Lacaka1	NA	MSTRG.7286	Induced during mycorrhization	NA	NA	NA	NA	NA	NA	NA	NA	NA	NA	NA	NA	NA	Unknown	Unknown	NA	3.45295	2.14024	1.92207	18.319	26.323	22.1752	3.17932	8.25e-05
Lacaka1|MSTRG.985	Lacaka1	NA	MSTRG.985	Induced during mycorrhization	NA	NA	NA	NA	NA	NA	NA	NA	NA	NA	NA	NA	NA	Unknown	Unknown	NA	0.276986	0.166898	0.760449	8257.54	16777.4	12240.3	14.6078	1.5e-60
Lacaka1|MSTRG.9861	Lacaka1	NA	MSTRG.9861	Induced during mycorrhization	NA	NA	NA	NA	NA	NA	NA	NA	NA	NA	NA	NA	NA	Unknown	Unknown	NA	2.90091	0	0	38.2748	39.4926	30.7615	4.71022	0.000184552
Lacaka1|MSTRG.9982	Lacaka1	NA	MSTRG.9982	Induced during mycorrhization	NA	NA	NA	NA	NA	NA	NA	NA	NA	NA	NA	NA	NA	Unknown	Unknown	NA	3.48966	3.05672	3.68113	33.8334	24.176	22.5916	3.24973	3.25e-06

## Sheet: Sheet S3B - L.deliciosus
Gene ID (this study)	JGI species ID	JGI protein ID	JGI gene ID	Gene regulation (genes are considered as differentially expressed if LFC > 2 or <-2 and p.value adjusted < 0.05)	Gene regulation_stage	Cluster ID in Figure 2B	Cluster ID in Figure 5	Secretion	Lipase	CAZyme family	CAZyme_substrate. PCW: Plant cell wall degrading enzyme.	Lectin	Subtilase family	Subtilase conservation. Subtilase missing one of their three catalytic regions were labelled as partial. If at least one of the catalytic region lack a perfect match to the pattern described in the litterature, the subtilase was labelled as containing a non-canonical region.	Enzyme Commission number	Enzyme Commission number description	PFAM domain ID	PFAM domain short description	KOG annotation	Highlighted functions	Highlighted functions additionnal details	Orthogroup ID	expression (TPM) in sample Ld48_2w_ct1 (FLM)	expression (TPM) in sample Ld48_2w_ct2 (FLM)	expression (TPM) in sample Ld48_2w_ct3 (FLM)	expression (TPM) in sample co48pt_2w1 (mycorrhiza - 2wpi)	expression (TPM) in sample co48pt_2w2 (mycorrhiza - 2wpi)	expression (TPM) in sample co48pt_2w3 (mycorrhiza - 2wpi)	expression (TPM) in sample myc48pt_4w1 (mycorrhiza - 4wpi)	expression (TPM) in sample myc48pt_4w2 (mycorrhiza - 4wpi)	expression (TPM) in sample myc48pt_4w3 (mycorrhiza - 4wpi)	expression (TPM) in sample myc48pt_6w1 (mycorrhiza - 6wpi)	expression (TPM) in sample myc48pt_6w2 (mycorrhiza - 6wpi)	expression (TPM) in sample myc48pt_6w3 (mycorrhiza - 6wpi)	log2FoldChange (LFC) between FLM and 2wpi	adjusted p.value associated to the DE analysis betweenFLM and 2wpi	log2FoldChange (LFC) between FLM and 4wpi	adjusted p.value associated to the DE analysis between FLM and 4wpi	log2FoldChange (LFC) between FLM and 6wpi	adjusted p.value associated to the DE analysis between FLM and 6wpi
Lacdel1|1017591	Lacdel1	1017591	gene_9767	Induced during mycorrhization	4 wpi only	C	IV	NA	NA	NA	NA	NA	NA	NA	NA	NA	PF05920	Homeobox_KN	Transcription	Transcription factor	Holds a homeobox transcription factor KN	OG0001637	1.93607	2.58143	2.15633	2.56301	4.35621	8.64444	18.0757	18.7454	21.0409	19.441	13.5451	22.8975	1.21461	1	3.29392	0.0400657	3.17875	0.110195
Lacdel1|1179548	Lacdel1	1179548	gene_8501	Induced during mycorrhization	4 wpi only	J	IV	NA	NA	NA	NA	NA	NA	NA	1.14.11.13	Gibberellin 2-beta-dioxygenase.	PF14226,PF03171	DIOX_N,2OG-FeII_Oxy	General function prediction only ; Secondary metabolites biosynthesis, transport and catabolism	Other function	Gibberellin 2-beta-dioxygenase.	OG0005538	36.5101	25.3398	28.4122	37.9679	54.0458	42.5989	286.253	251.414	174.144	140.721	158.852	92.237	0.7178	1	3.40804	3.93e-06	2.52235	1
Lacdel1|1516957	Lacdel1	1516957	gene_3613	Induced during mycorrhization	6 wpi only	J	IV	NA	NA	NA	NA	NA	NA	NA	2.5.1.39	4-hydroxybenzoate nonaprenyltransferase.	PF01040	UbiA	Coenzyme transport and metabolism	Other function	Holds a UbiA domain	OG0005611	25.7877	33.7851	27.4293	41.8744	44.8708	53.5271	90.1515	95.7385	111.075	192.933	172.338	608.513	0.757612	1	2.09831	1	3.76402	2.92e-05
Lacdel1|1537630	Lacdel1	1537630	gene_10780	Induced during mycorrhization	6 wpi only	E	IV	NA	NA	NA	NA	NA	NA	NA	1.3.1.33	Protochlorophyllide reductase.	PF00106,PF13561,PF08659,PF01370	adh_short,adh_short_C2,KR,Epimerase	Secondary metabolites biosynthesis, transport and catabolism	Other function	Protochlorophyllide reductase.	OG0000204	2.10522	2.42876	2.6125	0.876757	1.74351	0.825822	2.06949	3.59347	1.70455	8.96437	23.5393	21.1182	-0.849815	1	0.481095	1	3.29888	0.020465
Lacdel1|1661219	Lacdel1	1661219	gene_1642	Induced during mycorrhization	4 wpi only	J	IV	NA	NA	NA	NA	NA	NA	NA	NA	NA	PF00155	Aminotran_1_2	Amino acid transport and metabolism	Other function	Aminotransferase	OG0007497	25.009	25.7625	24.4299	18.9682	16.1176	19.7871	84.2557	195.516	175.779	42.0516	51.9534	62.4392	-0.276503	1	2.9535	0.00292714	1.41583	1
Lacdel1|1679435	Lacdel1	1679435	gene_1821	Induced during mycorrhization	4 and 6 wpi	J	IV	NA	NA	NA	NA	NA	NA	NA	NA	NA	PF05032	Spo12	NA	Other function	Spo12	OG0005010	31.4015	31.9665	35.1283	54.3053	45.6896	53.5253	172.799	181.834	228.4	134.99	166.129	187.922	0.737251	1	2.93278	7e-07	2.65072	0.00303284
Lacdel1|1868869	Lacdel1	1868869	gene_4264	Induced during mycorrhization	4 and 6 wpi	H	IV	NA	NA	NA	NA	NA	NA	NA	NA	NA	PF00083,PF07690	Sugar_tr,MFS_1	General function prediction only	Transporter/Permease	Sugar transporter	OG0004100	11.8932	11.1058	11.4866	8.37729	17.1083	9.81436	3066.22	2898.16	2619.34	940.124	812.798	1170.66	0.0263329	1	8.25119	2.57e-172	6.69294	1.24e-96
Lacdel1|2201434	Lacdel1	2201434	gene_11125	Induced during mycorrhization	4 and 6 wpi	E	IV	NA	NA	NA	NA	NA	NA	NA	3.4.14.9	Tripeptidyl-peptidase I.	NA	NA	NA			OG0015146	0	0	0	0	0	0.432268	6.95273	6.42662	6.18267	3.95997	1.85613	14.4024	1.34373	1	7.00348	0.00643043	6.93372	0.00896392
Lacdel1|2213485	Lacdel1	2213485	gene_1568	Induced during mycorrhization	4 and 6 wpi	C	IV	NA	NA	NA	NA	NA	NA	NA	NA	NA	PF09729	Gti1_Pac2	Carbohydrate transport and metabolism ; Signal transduction mechanisms	Other function	Holds a Gti1_Pac2 domain	OG0002619	3.80288	6.41572	6.51659	7.71336	7.22683	9.32579	61.8933	81.5798	53.6373	36.0196	39.7048	42.8965	0.61405	1	3.88525	1.04e-16	3.14012	6.76e-06
Lacdel1|2214325	Lacdel1	2214325	gene_758	Induced during mycorrhization	4 wpi only	I	IV	NA	NA	NA	NA	NA	NA	NA	NA	NA	PF04716	ETC_C1_NDUFA5	Energy production and conversion	Other function	Holds a ETC_C1_NDUFA5 domain	OG0009019	93.4927	86.8686	78.2502	94.6991	110.373	103.829	345.434	407.912	389.402	181.772	203.896	275.776	0.362948	1	2.54488	0.00963149	1.73936	1
Lacdel1|2218811	Lacdel1	2218811	gene_4471	Induced during mycorrhization	4 wpi only	C	IV	SSP	71423796|GX|abH23	NA	NA	NA	NA	NA	3.1.1.3	Triacylglycerol lipase.	PF01764	Lipase_3	Lipid transport and metabolism	Lipase	Triacylglycerol lipase.	OG0003786	3.12241	4.99292	3.36122	4.62056	5.13183	3.98149	19.3731	28.1703	20.1868	13.7576	9.86933	13.524	0.41548	1	2.84991	0.0137446	2.02415	1
Lacdel1|2219044	Lacdel1	2219044	gene_5617	Induced during mycorrhization	4 and 6 wpi	J	IV	NA	NA	NA	NA	NA	NA	NA	NA	NA	PF07690	MFS_1	Carbohydrate transport and metabolism	Transporter/Permease	Unknown transporter	OG0004634	12.4249	13.1178	12.3825	43.0712	45.36	41.4918	77.4055	68.1359	72.5045	155.656	189.198	90.7794	1.85046	1	2.86734	0.00404829	3.84836	2.2e-14
Lacdel1|2223574	Lacdel1	2223574	gene_9340	Induced during mycorrhization	6 wpi only	J	IV	NA	NA	NA	NA	NA	NA	NA	5.2.1.8	Peptidylprolyl isomerase.	PF00254	FKBP_C	Posttranslational modification, protein turnover, chaperones	Other function	Peptidylprolyl isomerase.	OG0005240	6.34278	7.59286	7.5959	8.57097	8.5786	9.67692	946.488	96.6503	77.5356	928.584	405.16	163	0.269244	1	4.63736	0.0865854	5.03656	0.0251934
Lacdel1|2224033	Lacdel1	2224033	gene_7636	Induced during mycorrhization	4 and 6 wpi	I	IV	NA	NA	GH16	Glucan	NA	NA	NA	NA	NA	PF00722	Glyco_hydro_16	NA	CAZyme	Glycoside Hydrolase	OG0002425	41.2092	46.4337	54.5988	27.1317	46.7183	56.0765	340.665	306.914	407.758	618.869	383.881	684.879	-0.0141053	1	3.31647	3.49e-05	3.96194	1.62e-11
Lacdel1|2224809	Lacdel1	2224809	gene_9389	Induced during mycorrhization	4 and 6 wpi	B	IV	Secreted	NA	GH18	Chitin	3c1__1E9L chi-lectin (TIM)	NA	NA	3.2.1.14	Chitinase.	PF00704	Glyco_hydro_18	Carbohydrate transport and metabolism	CAZyme	Glycoside Hydrolase	OG0000948	5.54545	4.71346	5.82212	4.8402	7.11989	5.38572	501.2	329.561	314.683	300.235	174.713	240.452	0.315483	1	6.60357	9.62e-62	5.8847	1.15e-43
Lacdel1|2225552	Lacdel1	2225552	gene_8990	Induced during mycorrhization	4 and 6 wpi	E	IV	NA	NA	NA	NA	NA	NA	NA	NA	NA	PF07690,PF00083	MFS_1,Sugar_tr	General function prediction only	Transporter/Permease	Sugar transporter	OG0003456	1.18191	1.89882	1.65	1.20004	1.39262	1.31788	29.2136	26.4904	18.6731	9.60983	9.47545	10.0337	0.011434	1	4.44677	7.72e-17	3.13185	0.00240298
Lacdel1|2227956	Lacdel1	2227956	gene_10899	Induced during mycorrhization	4 and 6 wpi	E	IV	NA	NA	NA	NA	NA	NA	NA	NA	NA	PF00266	Aminotran_5	Coenzyme transport and metabolism	Other function	Aminotransferase	OG0002738	0.207672	0.33589	0.409737	0.251056	0.296634	0.172447	3.46915	2.83203	3.37853	8.25848	8.46428	6.60772	-0.620428	1	3.9522	0.000650895	5.13479	1.39e-10
Lacdel1|2228932	Lacdel1	2228932	gene_17334	Induced during mycorrhization	6 wpi only	J	IV	NA	NA	NA	NA	NA	NA	NA	NA	NA	PF00378	ECH_1	Lipid transport and metabolism	Other function	Crotonase	OG0000724	42.2982	42.9714	41.236	50.1255	51.3001	51.9591	60.4856	52.2791	53.8256	191.702	282.827	223.968	0.214468	1	0.718755	1	2.60761	0.00578642
Lacdel1|2231201	Lacdel1	2231201	gene_14611	Induced during mycorrhization	6 wpi only	J	IV	NA	NA	NA	NA	NA	NA	NA	NA	NA	PF00320	GATA	Transcription	Transcription factor	Holds a zinc finger domain	OG0002471	65.3984	66.4318	55.7472	41.4132	43.3292	52.8921	209.91	207.569	232.24	400.909	260.938	455.805	-0.307595	1	2.20102	1	2.99704	9.74e-06
Lacdel1|2232406	Lacdel1	2232406	gene_14860	Induced during mycorrhization	4 and 6 wpi	J	IV	NA	NA	NA	NA	NA	NA	NA	1.97.1.4	Formate acetyltransferase activating enzyme.	PF07690	MFS_1	Carbohydrate transport and metabolism	Transporter/Permease	Unknown transporter	OG0000540	10.8228	13.3982	10.5789	24.7678	19.9612	18.5642	55.8628	80.1664	92.1562	149.306	247.993	245.23	1.06539	1	3.17706	6.99e-06	4.65854	2.48e-30
Lacdel1|2295724	Lacdel1	2295724	gene_14303	Induced during mycorrhization	4 and 6 wpi	E	IV	Secreted	NA	NA	NA	NA	S53	cannonical region	3.4.14.9	Tripeptidyl-peptidase I.	PF09286	Pro-kuma_activ	NA	Protease	Sedolisin (S53)	OG0001431	0.55922	1.35454	0.756047	1.07132	0.462645	0.663928	15.3102	13.3333	13.8136	9.11159	7.97626	7.86587	-0.278891	1	4.354	4.02e-17	3.54735	3.95e-07
Lacdel1|2313608	Lacdel1	2313608	gene_5118	Induced during mycorrhization	4 and 6 wpi	J	IV	NA	NA	NA	NA	NA	NA	NA	3.6.1.19	Nucleoside-triphosphate pyrophosphatase.	PF01725	Ham1p_like	Nucleotide transport and metabolism	Other function	Ham1p_like	OG0015284	9.5474	9.67038	9.97465	16.2641	18.0208	20.1939	346.667	370.003	448.003	155.359	124.778	187.086	0.970355	1	6.1219	1.46e-87	4.79029	2.45e-39
Lacdel1|2316391	Lacdel1	2316391	gene_8937	Induced during mycorrhization	4 and 6 wpi	C	IV	NA	NA	NA	NA	NA	NA	NA	NA	NA	PF07690,PF00083	MFS_1,Sugar_tr	General function prediction only	Transporter/Permease	Sugar transporter	OG0003456	0.424799	0.393012	0.388081	0.524893	0.504155	0.480204	346.228	273.149	172.341	49.2126	59.6705	24.1009	0.468449	1	9.74527	3.38e-52	7.05033	6.4e-22
Lacdel1|2320201	Lacdel1	2320201	gene_12880	Induced during mycorrhization	4 and 6 wpi	C	IV	NA	NA	NA	NA	NA	NA	NA	NA	NA	PF00083,PF07690	Sugar_tr,MFS_1	General function prediction only	Transporter/Permease	Sugar transporter	OG0015451	2.67837	2.39345	4.61056	5.06229	8.47302	11.2233	59.4037	114.921	101.973	56.2067	82.3465	110.641	1.24018	1	4.81056	3.9e-15	4.66956	1.43e-13
Lacdel1|2338915	Lacdel1	2338915	gene_2960	Induced during mycorrhization	4 wpi only	J	IV	NA	NA	NA	NA	NA	NA	NA	NA	NA	PF00248	Aldo_ket_red	Energy production and conversion	Other function	Aldo/keto reductase	OG0007655	37.032	40.295	35.829	35.7319	44.5227	39.7557	286.493	345.146	271.118	168.768	141.734	134.727	0.195302	1	3.35606	1.05e-20	2.32923	0.443505
Lacdel1|2341727	Lacdel1	2341727	gene_2338	Induced during mycorrhization	4 and 6 wpi	I	IV	NA	NA	NA	NA	NA	NA	NA	3.4.24.56	Insulysin.	PF16187,PF00675,PF05193	Peptidase_M16_M,Peptidase_M16,Peptidase_M16_C	Posttranslational modification, protein turnover, chaperones	Protease	Pitrilysin (M16)	OG0007999	60.2703	51.8399	53.7896	46.3186	52.8103	43.4451	436.84	252.177	284.246	902.011	818.778	761.979	-0.0828874	1	3.00962	0.000104039	4.33947	2.04e-25
Lacdel1|2349272	Lacdel1	2349272	gene_1971	Induced during mycorrhization	4 wpi only	C	IV	NA	NA	NA	NA	NA	NA	NA	1.1.1.102	3-dehydrosphinganine reductase.	PF00106,PF13561,PF08659	adh_short,adh_short_C2,KR	Secondary metabolites biosynthesis, transport and catabolism	Other function	3-dehydrosphinganine reductase.	OG0005716	7.78386	9.32632	8.70696	7.43704	10.3554	12.2067	30.4666	47.7643	54.1063	21.0376	22.8013	31.3867	0.446766	1	3.05201	0.00101758	2.19183	1
Lacdel1|2355135	Lacdel1	2355135	gene_5640	Induced during mycorrhization	4 and 6 wpi	I	IV	NA	NA	NA	NA	NA	NA	NA	NA	NA	PF00403	HMA	Inorganic ion transport and metabolism	Other function	Holds a HMA domain	OG0006967	115.514	94.8519	105.795	128.617	119.933	112.52	1309.17	752.273	1030.97	972.28	773.987	1182.76	0.316186	1	3.67441	4.99e-12	3.56373	2.08e-10
Lacdel1|2362824	Lacdel1	2362824	gene_4861	Induced during mycorrhization	4 and 6 wpi	I	IV	NA	NA	NA	NA	NA	NA	NA	NA	NA	PF02535	Zip	Inorganic ion transport and metabolism	Other function	Holds a Zip domain	OG0001617	28.3734	34.8896	33.1909	160.245	324.686	172.726	818.876	686.614	707.59	1957.45	1988.77	1634.33	2.87853	0.465152	4.93252	4.42e-32	6.22798	1.09e-66
Lacdel1|2370819	Lacdel1	2370819	gene_6843	Induced during mycorrhization	4 and 6 wpi	C	IV	NA	NA	NA	NA	NA	NA	NA	NA	NA	NA	NA	NA	Unknown	Unknown	OG0003229	3.28158	4.28525	3.72225	2.81459	4.42693	4.78745	82.9239	121.437	105.208	26.5629	21.8748	78.8566	0.130245	1	4.96586	1.91e-12	3.65969	0.000933734
Lacdel1|2379735	Lacdel1	2379735	gene_8066	Induced during mycorrhization	4 wpi only	J	IV	NA	NA	NA	NA	NA	NA	NA	NA	NA	PF00249,PF13921	Myb_DNA-binding,Myb_DNA-bind_6	NA	Transcription factor	Putative transcription factor	OG0004734	34.2843	34.6866	35.5098	30.9213	34.3579	31.8497	407.475	604.845	321.245	24.1905	67.6693	35.3133	0.0243053	1	4.08114	1.52e-10	0.677422	1
Lacdel1|2395746	Lacdel1	2395746	gene_12014	Induced during mycorrhization	4 wpi only	J	IV	NA	NA	GT20	NA	NA	NA	NA	NA	NA	PF00982,PF02358	Glyco_transf_20,Trehalose_PPase	Carbohydrate transport and metabolism	CAZyme	Glycosyltransferase	OG0003891	85.3866	83.9228	83.2314	68.9644	67.7988	65.6974	292.422	321.421	324.18	88.3719	112.303	127.293	-0.0296792	1	2.44064	0.00774329	0.886519	1
Lacdel1|2399960	Lacdel1	2399960	gene_13479	Induced during mycorrhization	4 wpi only	J	IV	NA	NA	NA	NA	NA	NA	NA	NA	NA	PF04718	ATP-synt_G	Energy production and conversion	Other function	Mitochondrial ATP synthase	OG0003392	38.6378	39.2406	36.2665	49.9004	61.5602	54.5572	145.567	150.781	154.353	76.9231	97.3537	88.4222	0.669912	1	2.36749	0.0425832	1.59609	1
Lacdel1|2400922	Lacdel1	2400922	gene_9803	Induced during mycorrhization	6 wpi only	J	IV	NA	NA	NA	NA	NA	NA	NA	1.3.99.-	With other acceptors.	PF00441,PF00173,PF02771	Acyl-CoA_dh_1,Cyt-b5,Acyl-CoA_dh_N	Amino acid transport and metabolism ; Lipid transport and metabolism	Other function	Acyl-CoA dehydrogenase	OG0003934	57.3478	60.9316	63.9551	57.3258	51.9586	56.2532	83.7972	91.9064	99.3463	249.281	347.721	223.503	-0.0268071	1	0.992525	1	2.54984	0.0207371
Lacdel1|2411100	Lacdel1	2411100	gene_13151	Induced during mycorrhization	4 wpi only	J	IV	NA	NA	NA	NA	NA	NA	NA	NA	NA	PF01042	Ribonuc_L-PSP	Translation, ribosomal structure and biogenesis	Other function	Endoribonuclease	OG0004007	40.0345	38.8846	38.446	55.8576	46.3553	61.5495	147.383	154.894	140.517	133.965	113.147	130.021	0.635985	1	2.42494	0.0294503	2.17322	1
Lacdel1|2417077	Lacdel1	2417077	gene_11842	Induced during mycorrhization	4 wpi only	J	IV	NA	NA	NA	NA	NA	NA	NA	2.7.4.3	Adenylate kinase.	PF00406,PF13207,PF05191	ADK,AAA_17,ADK_lid	Nucleotide transport and metabolism	Other function	Adenylate kinase.	OG0002151	24.8769	20.1755	19.332	25.904	33.4516	36.6123	80.8102	141.377	161.394	58.7469	58.9996	102.031	0.688642	1	2.91844	0.0139868	2.1297	1
Lacdel1|2502897	Lacdel1	2502897	gene_215	Induced during mycorrhization	6 wpi only	J	IV	NA	39969663|GGGX|abH04	NA	NA	NA	NA	NA	3.1.1.3	Triacylglycerol lipase.	PF07859,PF00135	Abhydrolase_3,COesterase	Defense mechanisms	Lipase	Triacylglycerol lipase.	OG0004820	37.4986	50.8788	34.9743	78.4919	66.2442	79.2696	64.4171	47.704	53.3432	288.11	356.08	269.707	0.98577	1	0.8249	1	3.25737	4.77e-10
Lacdel1|2504663	Lacdel1	2504663	gene_2181	Induced during mycorrhization	6 wpi only	I	IV	NA	NA	NA	NA	NA	NA	NA	NA	NA	PF00578,PF10417,PF08534	AhpC-TSA,1-cysPrx_C,Redoxin	Posttranslational modification, protein turnover, chaperones	Other function	Peroxiredoxins	OG0008095	137.663	111.116	156.136	40.1087	42.8066	42.3803	217.319	231.189	1117.06	2539.59	3530.33	2356.75	-1.46553	1	2.32773	1	4.73516	0.000245894
Lacdel1|2506534	Lacdel1	2506534	gene_7598	Induced during mycorrhization	4 and 6 wpi	B	IV	NA	NA	NA	NA	NA	NA	NA	NA	NA	PF03169	OPT	Signal transduction mechanisms	Transporter/Permease	oligopeptide transporter	OG0002440	6.71735	8.89394	9.37576	7.50852	9.36102	8.41871	392.129	375.327	357.557	239.694	205.046	265.308	0.104564	1	5.88007	4.98e-109	5.21207	3.74e-74
Lacdel1|2506632	Lacdel1	2506632	gene_11412	Induced during mycorrhization	4 and 6 wpi	B	IV	NA	NA	NA	NA	NA	NA	NA	NA	NA	PF03169	OPT	Signal transduction mechanisms	Transporter/Permease	oligopeptide transporter	OG0002038	5.21506	6.38335	5.60238	7.43399	8.03523	9.26251	163.886	143.445	179.779	341.312	579.751	539.521	0.628409	1	5.15721	6.08e-50	6.69058	2.28e-110
Lacdel1|2506692	Lacdel1	2506692	gene_9380	Induced during mycorrhization	4 and 6 wpi	J	IV	NA	NA	NA	NA	NA	NA	NA	NA	NA	PF03239	FTR1	NA	Transporter/Permease	Iron permease	OG0003117	5.69576	5.49325	6.96078	3.93153	4.64801	7.21153	785.582	1146.74	798.465	101.683	133.624	127.503	-0.0563898	1	7.59428	1.62e-150	4.67911	9e-34
Lacdel1|2506706	Lacdel1	2506706	gene_9406	Induced during mycorrhization	6 wpi only	J	IV	NA	NA	NA	NA	NA	NA	NA	NA	NA	PF00487,PF00173	FA_desaturase,Cyt-b5	Lipid transport and metabolism	Other function	Fatty acid desaturase	OG0003115	36.7961	32.4608	35.0486	23.4295	30.7674	37.2887	58.0024	39.5829	28.7016	137.42	475.064	483.557	-0.083996	1	0.732645	1	3.77955	8.78e-05
Lacdel1|2507273	Lacdel1	2507273	gene_12102	Induced during mycorrhization	4 wpi only	C	IV	NA	NA	NA	NA	NA	NA	NA	NA	NA	PF06738,PF12821	ThrE,ThrE_2	NA	Transporter/Permease	Threonine/Serine exporter	OG0007139	3.02724	3.27345	2.23032	2.61506	3.034	4.25486	26.7991	40.5525	49.8467	9.64526	7.16349	15.6147	0.299764	1	4.11025	8.91e-11	2.2556	1
Lacdel1|2508800	Lacdel1	2508800	gene_17163	Induced during mycorrhization	4 wpi only	J	IV	NA	NA	NA	NA	NA	NA	NA	2.4.2.28	5'-methylthioadenosine phosphorylase.	PF01048	PNP_UDP_1	Nucleotide transport and metabolism	Other function	Phosphorylase	OG0007977	46.9119	45.6857	48.018	70.3207	78.654	81.3048	302.9	257.272	235.959	145.308	148.73	159.032	0.890336	1	2.93725	3.01e-09	2.0867	1
Lacdel1|2517344	Lacdel1	2517344	gene_5062	Induced during mycorrhization	4 wpi only	C	IV	NA	NA	NA	NA	NA	NA	NA	3.6.1.3	Adenosinetriphosphatase.	PF00664,PF00005,PF02463	ABC_membrane,ABC_tran,SMC_N	Secondary metabolites biosynthesis, transport and catabolism	Other function	Structural maintenance of chromosomes protein	OG0015925	12.9067	13.5074	11.7291	11.5563	11.02	11.3727	63.6137	95.1674	109.714	53.6806	37.9482	84.6837	-0.045266	1	3.21046	4.79e-05	2.58681	0.457086
Lacdel1|2517764	Lacdel1	2517764	gene_6427	Induced during mycorrhization	6 wpi only	E	IV	NA	NA	NA	NA	NA	NA	NA	NA	NA	PF00248	Aldo_ket_red	General function prediction only	Other function	Aldo/keto reductase	OG0001546	0.381816	0.290025	0.589587	0.943536	0.601993	0.827142	3.20339	2.94835	1.91909	6.9959	3.17878	2.63439	1.14172	1	3.50617	0.312165	4.08317	0.0193537
Lacdel1|2518786	Lacdel1	2518786	gene_6609	Induced during mycorrhization	4 wpi only	I	IV	NA	NA	NA	NA	NA	NA	NA	NA	NA	PF01215	COX5B	Energy production and conversion	Other function	Cytochrome c oxidase	OG0006553	133.302	139.253	142.573	201.788	193.591	217.153	662.444	604.325	640.309	465.187	559.654	522.624	0.67203	1	2.59178	1.04e-05	2.27301	0.432724
Lacdel1|2525025	Lacdel1	2525025	gene_17333	Induced during mycorrhization	4 wpi only	J	IV	NA	NA	NA	NA	NA	NA	NA	NA	NA	NA	NA	Energy production and conversion	Unknown	Unknown	OG0001030	61.9585	59.3846	62.6219	82.1115	87.0235	69.0371	210.741	323.728	345.52	129.596	163.266	204.141	0.565032	1	2.68874	0.0222572	1.89343	1
Lacdel1|2542512	Lacdel1	2542512	gene_7634	Induced during mycorrhization	6 wpi only	J	IV	NA	NA	NA	NA	NA	NA	NA	NA	NA	PF13632,PF13641	Glyco_trans_2_3,Glyco_tranf_2_3	NA	Other function	Holds Glycosyl transferase domain	OG0007361	17.6553	20.9875	20.1564	15.1981	18.1765	19.5316	69.3812	72.7364	111.834	141.477	106.162	163.247	-0.0657283	1	2.45214	0.651892	3.13737	3.08e-06
Lacdel1|2542766	Lacdel1	2542766	gene_10190	Induced during mycorrhization	4 wpi only	J	IV	Secreted	NA	GH3	NA	NA	NA	NA	3.2.1.21	Beta-glucosidase.	PF01915,PF00933,PF14310	Glyco_hydro_3_C,Glyco_hydro_3,Fn3-like	NA	CAZyme	Glycoside Hydrolase	OG0000227	21.6104	26.1943	36.2654	30.8966	37.4652	57.3991	160.621	175.346	156.933	63.4396	42.2637	64.3269	0.712557	1	2.98051	0.00366577	1.41905	1
Lacdel1|2564981	Lacdel1	2564981	gene_5968	Induced during mycorrhization	4 and 6 wpi	C	IV	Secreted	CAH17527|GGGX|abH03	NA	NA	NA	NA	NA	3.1.1.3	Triacylglycerol lipase.	PF00135,PF07859	COesterase,Abhydrolase_3	Signal transduction mechanisms	Lipase	Triacylglycerol lipase.	OG0000306	1.99496	2.54591	4.0795	4.86364	9.04968	34.8365	113.972	62.3168	52.025	63.6415	56.8392	69.5909	2.67021	1	5.21152	8.03e-05	4.88884	0.00079658
Lacdel1|2576983	Lacdel1	2576983	gene_19133	Induced during mycorrhization	4 and 6 wpi	C	IV	NA	NA	NA	NA	NA	NA	NA	NA	NA	PF05920	Homeobox_KN	Transcription	Transcription factor	Holds a homeobox transcription factor KN	OG0001637	1.4269	2.09798	1.941	2.0992	3.48361	6.62129	13.3456	15.5393	17.4219	16.2784	10.258	18.2109	1.40676	1	3.78087	0.00650907	3.68767	0.0153745
Lacdel1|257870	Lacdel1	257870	gene_5110	Induced during mycorrhization	6 wpi only	J	IV	NA	NA	NA	NA	NA	NA	NA	NA	NA	PF03169	OPT	Signal transduction mechanisms	Transporter/Permease	oligopeptide transporter	OG0001207	19.7214	18.7463	17.4556	12.9968	14.3787	14.0073	75.2283	63.3425	82.0674	165.302	145.964	148.75	-0.288408	1	2.39721	0.0919147	3.43895	4.49e-24
Lacdel1|2611804	Lacdel1	2611804	gene_9379	Induced during mycorrhization	4 wpi only	J	IV	Secreted	NA	AA1_2	NA	NA	NA	NA	1.10.3.3	L-ascorbate oxidase.	PF07731,PF07732,PF00394	Cu-oxidase_2,Cu-oxidase_3,Cu-oxidase	Secondary metabolites biosynthesis, transport and catabolism	CAZyme	Ferroxidase	OG0003118	17.0528	17.3288	19.8676	13.7738	14.2157	20.0667	211.215	323.389	248.008	29.0317	37.766	38.5445	-0.0381167	1	4.27464	2.84e-37	1.35995	1
Lacdel1|2613932	Lacdel1	2613932	gene_8739	Induced during mycorrhization	6 wpi only	I	IV	NA	NA	NA	NA	NA	NA	NA	4.1.1.15	Glutamate decarboxylase.	PF00282,PF00266	Pyridoxal_deC,Aminotran_5	Amino acid transport and metabolism	Other function	Glutamate decarboxylase.	OG0008359	70.474	71.8507	74.7651	62.8721	59.1978	55.0367	123.338	97.1073	92.6031	702.183	589.948	281.632	-0.155367	1	0.950051	1	3.2667	0.000140217
Lacdel1|2643203	Lacdel1	2643203	gene_13159	Induced during mycorrhization	4 and 6 wpi	C	IV	NA	NA	NA	NA	NA	NA	NA	NA	NA	PF00153	Mito_carr	NA	Transporter/Permease	Mitochondrial carriers	OG0001743	6.16802	8.13576	6.8723	9.15616	9.59293	13.2433	33.0764	42.7433	37.1159	28.7951	36.4997	42.0178	0.723125	1	2.81115	0.000561606	2.71805	0.00486712
Lacdel1|2657190	Lacdel1	2657190	gene_5763	Induced during mycorrhization	4 wpi only	I	IV	NA	NA	GT20	NA	NA	NA	NA	NA	NA	PF00982,PF02358	Glyco_transf_20,Trehalose_PPase	Carbohydrate transport and metabolism	CAZyme	Glycosyltransferase	OG0001606	70.8294	68.897	79.2502	44.1058	42.4418	61.049	590.215	468.756	377.732	231.267	346.279	283.631	-0.426909	1	3.17099	2.59e-06	2.39485	1
Lacdel1|2670866	Lacdel1	2670866	gene_3276	Induced during mycorrhization	6 wpi only	J	IV	NA	NA	NA	NA	NA	NA	NA	4.1.1.1	Pyruvate decarboxylase.	PF02776,PF00205,PF02775	TPP_enzyme_N,TPP_enzyme_M,TPP_enzyme_C	Amino acid transport and metabolism ; Coenzyme transport and metabolism	Other function	Pyruvate decarboxylase.	OG0008302	28.8395	32.0368	29.2616	18.1983	16.815	21.2935	48.9914	35.13	36.6576	465.024	335.271	333.831	-0.579884	1	0.827427	1	4.02998	6.99e-25
Lacdel1|2675791	Lacdel1	2675791	gene_8610	Induced during mycorrhization	4 wpi only	J	IV	NA	NA	NA	NA	NA	NA	NA	2.7.4.3	Adenylate kinase.	PF00406,PF13207,PF05191	ADK,AAA_17,ADK_lid	Nucleotide transport and metabolism	Other function	Adenylate kinase.	OG0002151	24.9701	23.4931	19.8363	24.0505	23.6548	27.5712	86.6542	152.092	161.292	51.6938	68.3619	97.6658	0.227035	1	2.89143	0.0064693	1.9971	1
Lacdel1|2676043	Lacdel1	2676043	gene_13320	Induced during mycorrhization	4 and 6 wpi	J	IV	NA	NA	AA3_3	PartialPCWdegradation	NA	NA	NA	1.1.3.13	Alcohol oxidase.	PF00732,PF05199	GMC_oxred_N,GMC_oxred_C	General function prediction only	CAZyme	Alcohol oxidase	OG0000783	35.2515	40.673	34.2857	31.0155	30.0852	41.8232	187.753	210.022	147.148	183.381	211.404	137.206	0.0125775	1	2.6879	0.0140805	2.65265	0.0299223
Lacdel1|2676140	Lacdel1	2676140	gene_9008	Induced during mycorrhization	4 wpi only	C	IV	NA	NA	NA	NA	NA	NA	NA	NA	NA	PF10343	Q_salvage	Coenzyme transport and metabolism	Other function	Holds a Q salvage domain	OG0002791	7.61886	8.89581	8.68094	7.8221	11.2706	9.313	47.416	48.4842	45.9551	15.5716	16.6229	21.0017	0.331007	1	3.07341	4.17e-09	1.60635	1
Lacdel1|2680923	Lacdel1	2680923	gene_22228	Induced during mycorrhization	4 wpi only	J	IV	NA	NA	NA	NA	NA	NA	NA	1.14.13.1	Salicylate 1-monooxygenase.	PF01494,PF07992,PF13450,PF01593,PF05834,PF04820	FAD_binding_3,Pyr_redox_2,NAD_binding_8,Amino_oxidase,Lycopene_cycl,Trp_halogenase	Energy production and conversion ; General function prediction only	Other function	Salicylate 1-monooxygenase.	OG0001733	33.662	31.1828	34.2562	49.8492	52.2565	48.5742	238.098	282.809	226.333	195.721	126.53	121.564	0.714885	1	3.31489	1.08e-10	2.55528	0.0883101
Lacdel1|288159	Lacdel1	288159	gene_16300	Induced during mycorrhization	4 and 6 wpi	B	IV	NA	NA	NA	NA	NA	NA	NA	NA	NA	PF03169	OPT	Signal transduction mechanisms	Transporter/Permease	oligopeptide transporter	OG0002038	2.49904	3.17133	2.63007	3.95357	4.86224	5.37986	98.0476	88.0554	115.474	217.17	386.758	332.647	0.90596	1	5.60023	1.56e-46	7.24615	2.58e-99
Lacdel1|316322	Lacdel1	316322	gene_6363	Induced during mycorrhization	4 wpi only	C	IV	NA	NA	NA	NA	NA	NA	NA	3.6.1.3	Adenosinetriphosphatase.	PF00664,PF00005,PF02463	ABC_membrane,ABC_tran,SMC_N	Secondary metabolites biosynthesis, transport and catabolism	Other function	Structural maintenance of chromosomes protein	OG0012870	4.1113	4.33087	4.62958	3.04287	3.63205	3.47236	21.475	25.165	22.8174	9.39218	9.83994	10.1158	-0.210495	1	2.77298	4.93e-10	1.52667	1
Lacdel1|320378	Lacdel1	320378	gene_6424	Induced during mycorrhization	4 wpi only	C	IV	NA	NA	NA	NA	NA	NA	NA	NA	NA	PF00701	DHDPS	NA	Other function	Holds a DHDPS domain	OG0003604	7.49721	13.0552	8.35802	46.0574	41.282	44.465	100.365	68.0243	51.9847	35.5843	39.0569	20.7276	2.21241	1	3.2916	0.000316652	2.05411	1
Lacdel1|335142	Lacdel1	335142	gene_17160	Induced during mycorrhization	6 wpi only	J	IV	NA	NA	NA	NA	NA	NA	NA	NA	NA	NA	NA	NA	Unknown	Unknown	OG0008728	22.2016	19.6047	16.9939	21.1029	28.5458	35.6266	61.2991	88.0178	100.449	348.795	370.339	279.041	0.688339	1	2.46687	0.609225	4.4568	6.07e-29
Lacdel1|880156	Lacdel1	880156	gene_8854	Induced during mycorrhization	4 and 6 wpi	I	IV	Secreted	NA	AA1_1	Phenols	NA	NA	NA	1.10.3.3	L-ascorbate oxidase.	PF00394,PF07731,PF07732	Cu-oxidase,Cu-oxidase_2,Cu-oxidase_3	Secondary metabolites biosynthesis, transport and catabolism	CAZyme	Laccase	OG0005444	29.998	39.8693	39.2553	73.9798	112.051	123.897	1057.36	1035.04	1396.36	843.401	492.852	744.48	1.57664	1	5.32736	2.97e-43	4.57013	1.3e-25
Lacdel1|959210	Lacdel1	959210	gene_2845	Induced during mycorrhization	6 wpi only	J	IV	NA	NA	NA	NA	NA	NA	NA	1.1.1.40	Malate dehydrogenase (oxaloacetate decarboxylating) (NADP+).	PF03949,PF00390	Malic_M,malic	Energy production and conversion	Other function	Malate dehydrogenase	OG0003913	46.5851	45.5794	43.2598	43.6607	47.4952	55.1376	110.787	84.0146	85.5751	162.131	238.547	232.862	0.226295	1	1.43852	1	2.58216	0.0345206
Lacdel1|966332	Lacdel1	966332	gene_2940	Induced during mycorrhization	4 wpi only	E	IV	NA	NA	NA	NA	NA	NA	NA	NA	NA	PF00225,PF16796	Kinesin,Microtub_bd	Cytoskeleton	Other function	Kinesin	OG0003890	0.649182	1.14005	1.30154	0.574892	1.63042	2.28626	8.31636	6.30421	7.22369	4.78855	3.21486	4.20831	0.784882	1	3.25798	0.00800167	2.3948	1
Lacdel1|MSTRG.2601	Lacdel1	NA	MSTRG.2601	Induced during mycorrhization	4 wpi only	J	IV	NA	NA	NA	NA	NA	NA	NA	NA	NA	PF00982	Glyco_transf_20	NA	Unknown	Unknown	OG0001606	24.9531	25.4764	28.0545	18.3882	17.6403	25.4112	195.115	154.796	138.257	79.8437	109.647	122.602	-0.173168	1	3.11511	3.01e-06	2.43467	0.793676
Lacdel1|104506	Lacdel1	104506	gene_17069	Induced during mycorrhization	4 and 6 wpi	C	III	NA	NA	NA	NA	NA	NA	NA	NA	NA	PF02133	Transp_cyt_pur	Coenzyme transport and metabolism ; Nucleotide transport and metabolism	Transporter/Permease	Nucleobases transporter	OG0003617	10.4039	13.4563	10.8407	19.9752	15.8437	22.4637	66.1822	79.503	90.2506	67.7525	77.0231	128.349	1.03929	1	3.44549	3.88e-07	3.61516	7.52e-09
Lacdel1|2213648	Lacdel1	2213648	gene_189	Induced during mycorrhization	4 and 6 wpi	I	III	NA	NA	NA	NA	NA	NA	NA	NA	NA	PF01937	DUF89	Function unknown	Unknown	Unknown	OG0006306	34.9145	35.1974	39.0239	37.3279	54.7246	61.1053	1754.19	503.179	350.071	945.372	1045.39	144.715	0.636388	1	5.07654	0.00207401	4.71158	0.0144427
Lacdel1|2218543	Lacdel1	2218543	gene_4352	Induced during mycorrhization	4 and 6 wpi	J	III	NA	NA	NA	NA	NA	NA	NA	NA	NA	PF00125	Histone	Chromatin structure and dynamics	Other function	Histone	OG0015159	33.6471	35.774	50.4631	48.8583	76.1682	85.4356	431.275	329.238	377.675	263.77	219.49	241.927	0.909455	1	3.64557	5.18e-11	2.99965	0.000598411
Lacdel1|2223073	Lacdel1	2223073	gene_8047	Induced during mycorrhization	4 and 6 wpi	I	III	NA	NA	NA	NA	NA	NA	NA	1.1.1.37	Malate dehydrogenase.	PF02866,PF00056	Ldh_1_C,Ldh_1_N	Energy production and conversion	Other function	Malate dehydrogenase	OG0005622	237.787	242.288	284.509	300.223	290.079	327.545	1366.07	1086.99	1024.28	1148.72	1063.74	1071.58	0.400345	1	2.61408	0.00287998	2.51483	0.0331087
Lacdel1|2228348	Lacdel1	2228348	gene_13155	Induced during mycorrhization	6 wpi only	J	III	NA	NA	NA	NA	NA	NA	NA	NA	NA	PF06415,PF01676,PF00884	iPGM_N,Metalloenzyme,Sulfatase	Carbohydrate transport and metabolism	Other function	Abhydrolase	OG0003246	23.1057	21.6587	21.9066	16.3603	15.5418	19.8684	47.5676	61.5596	67.2587	80.8052	94.9673	115.804	-0.162531	1	1.86508	1	2.57307	0.00864533
Lacdel1|2263540	Lacdel1	2263540	gene_8060	Induced during mycorrhization	4 and 6 wpi	I	III	NA	NA	GT35	NA	NA	NA	NA	2.4.1.1	Phosphorylase.	PF00343	Phosphorylase	Carbohydrate transport and metabolism	CAZyme	Glycosyltransferase	OG0007523	244.513	244.969	244.352	161.231	173.982	152.499	2912.81	3855.51	3015.3	1218.45	1513.33	1091.36	-0.474261	1	4.09631	1.13e-50	2.72932	5.12e-06
Lacdel1|2266468	Lacdel1	2266468	gene_8231	Induced during mycorrhization	4 and 6 wpi	C	III	NA	NA	NA	NA	NA	NA	NA	5.5.1.4	Myo-inositol-1-phosphate synthase.	PF07994,PF01658	NAD_binding_5,Inos-1-P_synth	Lipid transport and metabolism	Other function	Myo-inositol-1-phosphate synthase.	OG0003146	5.66637	5.36323	6.55476	4.67057	4.21277	4.35218	45.8755	60.1076	76.4105	54.1688	91.6469	92.4907	-0.292896	1	3.81563	5.71e-13	4.18252	1.06e-18
Lacdel1|2271594	Lacdel1	2271594	gene_16523	Induced during mycorrhization	4 and 6 wpi	C	III	NA	NA	NA	NA	NA	NA	NA	2.2.1.1	Transketolase.	PF00456,PF02780	Transketolase_N,Transketolase_C	Carbohydrate transport and metabolism	Other function	Transketolase.	OG0007067	6.15117	5.38077	6.00313	5.6553	7.06342	7.71315	56.4068	62.2881	70.6034	87.6438	39.7125	82.6746	0.348445	1	3.95712	2.74e-11	4.09526	7.01e-13
Lacdel1|2310026	Lacdel1	2310026	gene_234	Induced during mycorrhization	6 wpi only	J	III	NA	NA	NA	NA	NA	NA	NA	5.3.3.2	Isopentenyl-diphosphate delta-isomerase.	PF00293	NUDIX	Secondary metabolites biosynthesis, transport and catabolism	Other function	Isopentenyl-diphosphate delta-isomerase.	OG0005312	21.5907	25.6695	24.2288	32.8183	27.5465	29.9163	57.008	76.4934	100.639	127.212	162.365	444.194	0.465183	1	2.15077	1	3.72879	4.81e-05
Lacdel1|2339813	Lacdel1	2339813	gene_3125	Induced during mycorrhization	4 and 6 wpi	J	III	NA	NA	NA	NA	NA	NA	NA	NA	NA	PF04082,PF00172	Fungal_trans,Zn_clus	NA	Transcription factor	Fungal specific transcription factor domain	OG0006234	30.9336	27.5174	26.8874	19.6858	20.6816	21.4934	234.823	167.939	167.754	217.761	154.517	177.621	-0.410354	1	2.98463	1.13e-05	2.97039	1.89e-05
Lacdel1|2359535	Lacdel1	2359535	gene_3904	Induced during mycorrhization	4 wpi only	J	III	NA	NA	NA	NA	NA	NA	NA	6.1.1.22	Asparagine--tRNA ligase.	PF00152,PF01336	tRNA-synt_2,tRNA_anti-codon	Translation, ribosomal structure and biogenesis	Other function	tRNA ligase	OG0003136	42.7512	44.5584	41.6925	49.957	51.3373	56.2509	210.134	339.518	232.02	83.1846	177.558	123.068	0.414107	1	2.99396	0.000580878	1.95898	1
Lacdel1|2361185	Lacdel1	2361185	gene_4562	Induced during mycorrhization	6 wpi only	I	III	NA	NA	NA	NA	NA	NA	NA	5.4.2.2	Phosphoglucomutase.	PF02878,PF02880,PF02879	PGM_PMM_I,PGM_PMM_III,PGM_PMM_II	Carbohydrate transport and metabolism	Other function	Phosphoglucomutase.	OG0008295	293.765	311.682	339.536	293.592	269.643	306.154	1045.4	1041.8	1570.47	2513.37	937.252	2417.41	0.0131856	1	2.3652	1	3.03359	0.0177532
Lacdel1|2376657	Lacdel1	2376657	gene_6630	Induced during mycorrhization	4 wpi only	J	III	NA	NA	GT20	NA	NA	NA	NA	2.4.1.15	Alpha,alpha-trehalose-phosphate synthase (UDP-forming).	PF00982	Glyco_transf_20	Carbohydrate transport and metabolism	CAZyme	Glycosyltransferase	OG0008646	54.5464	45.1628	57.5161	45.4878	48.1701	51.004	447.947	398.849	325.076	162.027	185.848	158.307	-0.0184608	1	3.27604	5.55e-14	2.05618	1
Lacdel1|2377314	Lacdel1	2377314	gene_7763	Induced during mycorrhization	4 wpi only	J	III	NA	NA	NA	NA	NA	NA	NA	1.1.1.86	Ketol-acid reductoisomerase.	PF07991,PF01450	IlvN,IlvC	NA	Other function	Ketol-acid reductoisomerase.	OG0007081	23.0829	31.1373	28.5	24.7321	31.1153	35.7913	134.724	358.038	320.8	63.8386	66.7566	109.469	0.2297	1	3.71599	1.02e-06	1.91871	1
Lacdel1|2388072	Lacdel1	2388072	gene_11498	Induced during mycorrhization	6 wpi only	I	III	NA	NA	NA	NA	NA	NA	NA	1.2.1.12	Glyceraldehyde 3-phosphate dehydrogenase (phosphorylating).	PF02800,PF00044	Gp_dh_C,Gp_dh_N	Carbohydrate transport and metabolism	Other function	Glyceraldehyde 3-phosphate dehydrogenase (phosphorylating).	OG0003541	301.695	306.223	420.857	315.085	266.557	356.749	947.743	742.276	726.868	1710.66	1855.82	1541.24	0.0349465	1	1.67093	1	2.7254	0.0093202
Lacdel1|2390457	Lacdel1	2390457	gene_8731	Induced during mycorrhization	4 and 6 wpi	I	III	SSP	NA	NA	NA	NA	NA	NA	2.7.4.6	Nucleoside-diphosphate kinase.	PF00334	NDK	Nucleotide transport and metabolism	Other function	Nucleoside-diphosphate kinase.	OG0008208	187.275	183.81	208.605	242.321	229.768	267.623	1996.17	1971.55	1884.77	1333.19	1421.57	1466.17	0.489859	1	3.74728	1.46e-58	3.25438	6.43e-30
Lacdel1|2398958	Lacdel1	2398958	gene_8116	Induced during mycorrhization	4 wpi only	I	III	NA	NA	NA	NA	NA	NA	NA	NA	NA	PF00125,PF00808	Histone,CBFD_NFYB_HMF	Chromatin structure and dynamics	Other function	Histone-like transcription factor	OG0000761	78.4691	73.6764	88.7054	107.87	127.177	143.866	337.936	308.656	366.357	304.575	278.625	276.489	0.764074	1	2.47354	0.0401855	2.21121	1
Lacdel1|2425797	Lacdel1	2425797	gene_12230	Induced during mycorrhization	4 and 6 wpi	F	III	NA	NA	AA6	PartialPCWdegradation	NA	NA	NA	1.6.5.2	Transferred entry: 1.6.99.2.	PF03358	FMN_red	General function prediction only	CAZyme	Benzoquinone reductase	OG0003251	280.493	362.48	386.077	571.625	463.664	542.26	2079.01	2405.71	3036.64	2277.53	2789.51	3021.87	0.720309	1	3.2764	7.8e-12	3.36561	1.85e-13
Lacdel1|2440963	Lacdel1	2440963	gene_17779	Induced during mycorrhization	4 and 6 wpi	C	III	NA	NA	NA	NA	NA	NA	NA	5.5.1.4	Myo-inositol-1-phosphate synthase.	PF07994,PF01658	NAD_binding_5,Inos-1-P_synth	Lipid transport and metabolism	Other function	Myo-inositol-1-phosphate synthase.	OG0003146	2.60891	3.16708	3.4264	3.1253	3.38653	3.59208	20.2538	35.2385	53.9456	30.5765	48.2609	61.5426	0.220617	1	3.96766	1.27e-07	4.30606	1.88e-10
Lacdel1|2455718	Lacdel1	2455718	gene_18751	Induced during mycorrhization	6 wpi only	I	III	NA	NA	NA	NA	NA	NA	NA	1.2.1.12	Glyceraldehyde 3-phosphate dehydrogenase (phosphorylating).	PF02800,PF00044	Gp_dh_C,Gp_dh_N	Carbohydrate transport and metabolism	Other function	Glyceraldehyde 3-phosphate dehydrogenase (phosphorylating).	OG0003541	260.396	256.712	347.373	290.261	232.091	320.683	968.473	770.555	743.59	1384.2	1546.77	1305.67	0.146431	1	2.00207	1	2.69707	0.0122484
Lacdel1|2507330	Lacdel1	2507330	gene_9833	Induced during mycorrhization	4 and 6 wpi	J	III	NA	NA	NA	NA	NA	NA	NA	4.1.1.35	UDP-glucuronate decarboxylase.	PF16363,PF01370,PF01073,PF07993	GDP_Man_Dehyd,Epimerase,3Beta_HSD,NAD_binding_4	Carbohydrate transport and metabolism ; Cell wall/membrane/envelope biogenesis	Other function	UDP-glucuronate decarboxylase.	OG0002157	19.8596	23.8241	27.518	21.5037	26.2309	36.5134	184.39	166.426	202.063	159.268	140.77	140.829	0.349053	1	3.36065	1.24e-10	3.02079	6.94e-06
Lacdel1|2507399	Lacdel1	2507399	gene_10466	Induced during mycorrhization	6 wpi only	J	III	NA	NA	NA	NA	NA	NA	NA	NA	NA	PF02284	COX5A	Energy production and conversion	Other function	Cytochrome c oxidase	OG0001254	34.8829	39.8768	31.1003	45.2918	48.2766	49.4088	114.14	124.993	197.55	144.063	195.412	252.682	0.560639	1	2.48442	0.732779	2.89171	0.00384806
Lacdel1|2507805	Lacdel1	2507805	gene_11272	Induced during mycorrhization	6 wpi only	I	III	NA	NA	NA	NA	NA	NA	NA	NA	NA	PF00687	Ribosomal_L1	Translation, ribosomal structure and biogenesis	Other function	Ribosomal protein	OG0001778	150.068	177.696	224.293	246.19	258.294	334.912	471.208	504.412	592.376	760.138	872.672	797.253	0.736056	1	1.93629	1	2.55262	0.045074
Lacdel1|2511824	Lacdel1	2511824	gene_1124	Induced during mycorrhization	4 and 6 wpi	I	III	NA	NA	NA	NA	NA	NA	NA	2.7.7.9	UTP--glucose-1-phosphate uridylyltransferase.	PF01704	UDPGP	Carbohydrate transport and metabolism	Other function	UTP--glucose-1-phosphate uridylyltransferase.	OG0007832	148.671	138.729	170.286	159.175	148.845	178.913	1747.27	1143.49	1557.37	2320.23	1148.11	2058.93	0.255965	1	3.77354	2.61e-10	4.03064	1.92e-13
Lacdel1|2515426	Lacdel1	2515426	gene_5463	Induced during mycorrhization	6 wpi only	I	III	NA	NA	NA	NA	NA	NA	NA	NA	NA	PF00253	Ribosomal_S14	Translation, ribosomal structure and biogenesis	Other function	Ribosomal protein	OG0005017	183.767	197.031	241.215	381.558	333.676	343.039	570.387	434.91	637.273	978.851	992.164	898.325	0.887295	1	1.82066	1	2.60438	0.0182576
Lacdel1|2528856	Lacdel1	2528856	gene_14275	Induced during mycorrhization	4 wpi only	I	III	NA	NA	NA	NA	NA	NA	NA	NA	NA	PF01423,PF14438	LSM,SM-ATX	RNA processing and modification	Other function	LSM	OG0007163	81.9168	80.9682	79.8616	99.3104	89.1415	101.389	356.753	350.95	321.192	196.636	231.679	293.093	0.425513	1	2.55819	0.00897001	2.03091	1
Lacdel1|2543873	Lacdel1	2543873	gene_12228	Induced during mycorrhization	6 wpi only	J	III	NA	NA	NA	NA	NA	NA	NA	4.4.1.1	Cystathionine gamma-lyase.	PF01053	Cys_Met_Meta_PP	Amino acid transport and metabolism	Other function	Cystathionine gamma-lyase.	OG0003621	24.4751	21.9168	26.8587	15.5255	15.0266	19.5967	65.0032	68.1684	168.975	229.349	147.851	271.714	-0.423385	1	2.46311	1	3.58847	8.46e-05
Lacdel1|2651266	Lacdel1	2651266	gene_5509	Induced during mycorrhization	6 wpi only	J	III	NA	NA	NA	NA	NA	NA	NA	2.8.1.6	Biotin synthase.	PF06968,PF04055	BATS,Radical_SAM	Coenzyme transport and metabolism	Other function	Biotin synthase.	OG0006703	21.7645	19.3789	19.7848	14.1472	14.2194	20.5674	84.8523	110.583	102.243	75.7646	135.517	96.9969	-0.202269	1	2.61729	0.0730667	2.65485	0.0486976
Lacdel1|74884	Lacdel1	74884	gene_6005	Induced during mycorrhization	4 wpi only	J	III	NA	NA	NA	NA	NA	NA	NA	3.5.99.6	Glucosamine-6-phosphate deaminase.	PF01182	Glucosamine_iso	Carbohydrate transport and metabolism	Other function	Glucosamine-6-phosphate deaminase.	OG0002987	21.7029	26.6835	26.9782	136.623	99.5396	130.665	162.323	117.854	138.924	106.108	102.817	109.666	2.38012	1	2.85389	0.000129739	2.42264	0.520342
Lacdel1|1059382	Lacdel1	1059382	gene_8598	Induced during mycorrhization	4 wpi only	E	VII	Secreted	NA	NA	NA	NA	S53	non-cannonical region	3.4.14.9	Tripeptidyl-peptidase I.	PF09286	Pro-kuma_activ	NA	Protease	Sedolisin (S53)	OG0009089	0.73209	0.702112	0.801169	0.393898	0.363739	0.460269	6.2877	6.50901	6.62545	2.87421	2.32071	3.09552	-1.42996	1	4.97883	4.33e-05	3.6721	0.214262
Lacdel1|108534	Lacdel1	108534	gene_16380	Induced during mycorrhization	4 and 6 wpi	C	VII	Secreted	NA	NA	NA	NA	S53	partial non-cannonical region	3.4.14.9	Tripeptidyl-peptidase I.	PF09286	Pro-kuma_activ	NA	Protease	Sedolisin (S53)	OG0012004	2.52442	2.71986	1.85759	2.48855	2.37349	2.59021	207.483	230.621	217.853	71.3519	67.6562	95.7289	0.225115	1	6.89209	9.32e-150	5.40012	3.17e-71
Lacdel1|109231	Lacdel1	109231	gene_16390	Induced during mycorrhization	4 and 6 wpi	E	VII	Secreted	NA	NA	NA	NA	S53	partial cannonical region	3.4.14.9	Tripeptidyl-peptidase I.	PF09286	Pro-kuma_activ	NA	Protease	Sedolisin (S53)	OG0000035	0.512442	0.309539	0.527016	0.299657	0.312157	0.28696	4.09054	7.07179	7.33617	4.87811	2.9429	9.71933	-0.360503	1	4.39319	2.71e-05	4.22915	0.000161125
Lacdel1|109643	Lacdel1	109643	gene_16397	Induced during mycorrhization	4 and 6 wpi	C	VII	Secreted	NA	NA	NA	NA	S53	partial cannonical region	3.4.14.9	Tripeptidyl-peptidase I.	PF09286	Pro-kuma_activ	NA	Protease	Sedolisin (S53)	OG0000035	1.55818	1.54601	1.46802	1.59547	1.56385	2.05383	13.653	16.6575	16.1431	17.4363	7.41866	14.4718	0.230801	1	3.81986	2.65e-06	3.55531	0.000163723
Lacdel1|1161357	Lacdel1	1161357	gene_9035	Induced during mycorrhization	4 and 6 wpi	B	VII	Secreted	NA	NA	NA	NA	S53	partial non-cannonical region	3.4.14.9	Tripeptidyl-peptidase I.	PF09286	Pro-kuma_activ	NA	Protease	Sedolisin (S53)	OG0000035	7.02388	6.56429	5.96497	10.7089	12.8516	11.4758	165.785	201.355	223.29	54.5602	39.4295	138.965	0.957374	1	5.28206	2.5e-20	3.93858	5.5e-07
Lacdel1|1446991	Lacdel1	1446991	gene_11135	Induced during mycorrhization	4 and 6 wpi	E	VII	Secreted	NA	NA	NA	NA	S53	non-cannonical region	3.4.14.9	Tripeptidyl-peptidase I.	PF09286	Pro-kuma_activ	NA	Protease	Sedolisin (S53)	OG0000110	0.292905	0.52657	0.248358	0.492259	0.201464	0.342949	11.5716	5.95573	9.79904	7.55747	5.01653	15.0343	0.325991	1	5.33759	1.74e-08	5.31146	2.91e-08
Lacdel1|1541485	Lacdel1	1541485	gene_10849	Induced during mycorrhization	4 wpi only	E	VII	Secreted	NA	NA	NA	NA	S53	partial non-cannonical region	3.4.14.9	Tripeptidyl-peptidase I.	PF09286	Pro-kuma_activ	NA	Protease	Sedolisin (S53)	OG0002003	0.828362	0.692796	0.825282	0.436685	0.576464	0.505836	10.6638	14.0878	8.74062	3.89675	3.42288	4.90126	-0.485526	1	4.10893	4.1e-12	2.66934	0.516286
Lacdel1|1761438	Lacdel1	1761438	gene_11948	Induced during mycorrhization	4 and 6 wpi	C	VII	Secreted	NA	NA	NA	NA	S53	non-cannonical region	3.4.14.9	Tripeptidyl-peptidase I.	PF09286	Pro-kuma_activ	NA	Protease	Sedolisin (S53)	OG0004376	0.733462	0.69321	0.643707	0.529009	0.637238	0.732053	28.9398	16.9206	12.139	13.1762	13.5074	13.3506	0.00996966	1	5.19978	9.37e-17	4.64658	2.68e-11
Lacdel1|1762496	Lacdel1	1762496	gene_11957	Induced during mycorrhization	4 and 6 wpi	C	VII	NA	NA	NA	NA	NA	S53	partial non-cannonical region	3.4.14.9	Tripeptidyl-peptidase I.	PF09286	Pro-kuma_activ	NA	Protease	Sedolisin (S53)	OG0000154	0.641492	1.10248	0.637644	2.23756	2.33095	2.46531	21.941	33.0618	18.2811	15.2327	13.4776	14.2483	1.88868	1	5.23763	2.14e-28	4.43266	1.17e-15
Lacdel1|1764707	Lacdel1	1764707	gene_11983	Induced during mycorrhization	4 and 6 wpi	C	VII	NA	NA	NA	NA	NA	S53	partial non-cannonical region	3.4.14.9	Tripeptidyl-peptidase I.	PF09286	Pro-kuma_activ	NA	Protease	Sedolisin (S53)	OG0000597	1.54598	1.32676	1.95834	1.87223	1.70539	1.3222	19.4816	9.05462	13.4081	22.3653	9.08059	13.667	0.0163328	1	3.37484	0.00411675	3.41686	0.00295616
Lacdel1|1778323	Lacdel1	1778323	gene_11287	Induced during mycorrhization	4 wpi only	E	VII	Secreted	NA	NA	NA	NA	S53	non-cannonical region	3.4.14.9	Tripeptidyl-peptidase I.	PF09286	Pro-kuma_activ	NA	Protease	Sedolisin (S53)	OG0002223	1.43632	1.6039	1.54981	0.487815	0.713131	1.45373	12.0774	11.7004	12.2544	6.16954	4.76171	4.88213	-0.536326	1	3.6291	5.18e-11	2.40618	1
Lacdel1|1842801	Lacdel1	1842801	gene_13697	Induced during mycorrhization	4 and 6 wpi	E	VII	Secreted	NA	NA	NA	NA	S53	non-cannonical region	3.4.14.9	Tripeptidyl-peptidase I.	PF09286	Pro-kuma_activ	NA	Protease	Sedolisin (S53)	OG0000102	0.23951	0.411121	0.550967	0.099895	0.030674	0.333511	8.35434	8.91843	8.9177	7.53455	4.83826	7.43656	-1.3284	1	3.75734	0.0170446	3.63288	0.0452601
Lacdel1|1843187	Lacdel1	1843187	gene_13711	Induced during mycorrhization	4 wpi only	E	VII	NA	NA	NA	NA	NA	S53	non-cannonical region	3.4.14.9	Tripeptidyl-peptidase I.	PF09286,PF00082	Pro-kuma_activ,Peptidase_S8	NA	Protease	Sedolisin (S53)	OG0000102	0.256329	0.372178	0.519244	0.158985	0.210437	0.263936	2.87672	3.8006	4.84094	1.55105	1.15779	4.71582	-0.157433	1	4.22158	0.00688409	3.49676	0.357155
Lacdel1|1860742	Lacdel1	1860742	gene_13602	Induced during mycorrhization	4 and 6 wpi	E	VII	Secreted	NA	NA	NA	NA	S53	non-cannonical region	3.4.14.9	Tripeptidyl-peptidase I.	PF09286,PF00082	Pro-kuma_activ,Peptidase_S8	NA	Protease	Sedolisin (S53)	OG0010416	0.475411	0.417898	0.505059	0.183636	0.653614	0.187728	10.2144	10.1298	10.5636	8.98902	5.02489	6.77032	-0.0852345	1	4.79334	6.18e-14	4.17252	3.33e-08
Lacdel1|188578	Lacdel1	188578	gene_18109	Induced during mycorrhization	4 and 6 wpi	B	VII	Secreted	NA	NA	NA	NA	NA	NA	3.4.23.5	Cathepsin D.	PF00026,PF14543	Asp,TAXi_N	Posttranslational modification, protein turnover, chaperones	Protease	Pepsin (A1)	OG0003962	5.63428	5.03141	4.91947	3.27654	3.89382	3.72433	100.742	64.8512	86.2604	74.6275	56.1289	47.5762	-0.391992	1	4.4554	8.23e-22	3.90791	5.08e-13
Lacdel1|1929554	Lacdel1	1929554	gene_12220	Induced during mycorrhization	4 wpi only	C	VII	Secreted	NA	NA	NA	NA	S53	non-cannonical region	3.4.14.9	Tripeptidyl-peptidase I.	PF09286	Pro-kuma_activ	NA	Protease	Sedolisin (S53)	OG0000126	4.99418	4.16905	4.71465	7.83868	6.9689	7.51196	21.352	23.8577	21.0162	20.3783	13.018	14.9244	0.730461	1	2.73377	0.0065507	2.19547	1
Lacdel1|1990044	Lacdel1	1990044	gene_12863	Induced during mycorrhization	4 wpi only	C	VII	Secreted	NA	NA	NA	NA	S53	non-cannonical region	3.4.14.9	Tripeptidyl-peptidase I.	PF09286	Pro-kuma_activ	NA	Protease	Sedolisin (S53)	OG0012126	7.05636	7.72077	8.77137	5.86826	7.79538	6.71159	44.1546	36.6679	34.0983	28.047	18.9056	26.3744	-0.0341246	1	2.73049	0.0173868	2.08534	1
Lacdel1|2217039	Lacdel1	2217039	gene_3320	Induced during mycorrhization	4 wpi only	C	VII	Secreted	NA	NA	NA	NA	S53	non-cannonical region	3.4.14.9	Tripeptidyl-peptidase I.	PF09286	Pro-kuma_activ	NA	Protease	Sedolisin (S53)	OG0000598	8.91495	8.55568	9.47917	3.64591	5.16298	5.10198	31.4427	34.3271	34.4802	31.4839	17.4379	21.5473	-0.454299	1	2.65501	0.0487724	2.09542	1
Lacdel1|2221629	Lacdel1	2221629	gene_7155	Induced during mycorrhization	4 wpi only	E	VII	Secreted	NA	NA	NA	NA	S53	cannonical region	3.4.14.9	Tripeptidyl-peptidase I.	PF09286,PF00082	Pro-kuma_activ,Peptidase_S8	NA	Protease	Sedolisin (S53)	OG0000246	0.379753	0.309285	0.686827	0.638935	0	0.248632	2.71911	5.51386	6.43693	1.30958	2.9297	2.18833	-0.125559	1	3.93689	0.00270108	2.72249	1
Lacdel1|2226832	Lacdel1	2226832	gene_12135	Induced during mycorrhization	4 and 6 wpi	C	VII	Secreted	NA	NA	NA	NA	S53	cannonical region	3.4.14.9	Tripeptidyl-peptidase I.	PF09286	Pro-kuma_activ	NA	Protease	Sedolisin (S53)	OG0001682	2.3383	2.13426	2.34663	1.66406	2.34075	1.25728	98.9975	122.322	139.136	40.8997	29.3567	84.1275	-0.22263	1	6.03945	6.59e-27	4.81279	6.64e-13
Lacdel1|2229419	Lacdel1	2229419	gene_12355	Induced during mycorrhization	4 and 6 wpi	E	VII	Secreted	NA	NA	NA	NA	S53	non-cannonical region	3.4.14.9	Tripeptidyl-peptidase I.	PF09286	Pro-kuma_activ	NA	Protease	Sedolisin (S53)	OG0000848	0.363605	0.280515	0.395997	0.091103	0.135842	0.270774	18.2201	18.7496	12.6971	7.36585	4.39292	6.12862	-1.00311	1	6.2542	6.41e-17	4.71997	1.2e-06
Lacdel1|2229555	Lacdel1	2229555	gene_13725	Induced during mycorrhization	4 and 6 wpi	E	VII	Secreted	NA	NA	NA	NA	S53	non-cannonical region	3.4.14.9	Tripeptidyl-peptidase I.	PF09286	Pro-kuma_activ	NA	Protease	Sedolisin (S53)	OG0000102	0.520305	1.24352	0.91784	0.298885	0.487567	0.412022	8.14405	8.55742	10.3371	5.29485	5.39283	5.86181	-1.00864	1	3.70888	7.46e-09	2.99833	0.00852206
Lacdel1|2231508	Lacdel1	2231508	gene_16377	Induced during mycorrhization	4 and 6 wpi	C	VII	Secreted	NA	NA	NA	NA	S53	non-cannonical region	3.4.14.9	Tripeptidyl-peptidase I.	PF09286	Pro-kuma_activ	NA	Protease	Sedolisin (S53)	OG0000848	4.27622	5.00342	5.09043	4.70898	4.11606	4.27682	54.2013	62.3956	73.5118	51.4735	24.0099	58.8911	-0.0587194	1	4.07853	2.44e-12	3.56026	7.72e-07
Lacdel1|2235588	Lacdel1	2235588	gene_22919	Induced during mycorrhization	4 and 6 wpi	C	VII	Secreted	NA	NA	NA	NA	S53	partial non-cannonical region	3.4.14.9	Tripeptidyl-peptidase I.	PF09286	Pro-kuma_activ	NA	Protease	Sedolisin (S53)	OG0010505	0.388974	0.330414	0.322928	0.333021	0.867046	0.171286	32.4195	32.8691	29.9827	19.4284	8.52972	33.489	0.674914	1	6.91603	1.8e-22	6.26177	1.03e-16
Lacdel1|2259487	Lacdel1	2259487	gene_4242	Induced during mycorrhization	4 wpi only	C	VII	Secreted	NA	NA	NA	NA	S53	partial non-cannonical region	3.4.14.9	Tripeptidyl-peptidase I.	PF09286	Pro-kuma_activ	NA	Protease	Sedolisin (S53)	OG0012220	3.65354	4.23501	3.09639	3.36703	3.48939	3.14876	30.0724	26.3406	21.5312	11.4778	10.8519	9.83771	0.0238424	1	3.16648	5.69e-08	1.85449	1
Lacdel1|2272550	Lacdel1	2272550	gene_16567	Induced during mycorrhization	4 wpi only	E	VII	Secreted	NA	NA	NA	NA	S53	non-cannonical region	3.4.14.9	Tripeptidyl-peptidase I.	PF09286	Pro-kuma_activ	NA	Protease	Sedolisin (S53)	OG0000102	0	0.099314	0.366107	0.173573	0.068556	0.256275	3.29351	3.53525	3.76031	2.54048	1.04682	1.23115	0.136014	1	4.62104	1.32e-05	3.46684	0.14493
Lacdel1|2289275	Lacdel1	2289275	gene_4918	Induced during mycorrhization	4 and 6 wpi	E	VII	Secreted	NA	NA	NA	NA	S53	non-cannonical region	3.4.14.9	Tripeptidyl-peptidase I.	PF09286	Pro-kuma_activ	NA	Protease	Sedolisin (S53)	OG0000102	0.644901	0.632648	0.368392	0.344189	0.151406	0.34651	8.69639	9.59232	9.13663	5.82454	5.099	6.90221	-0.806085	1	4.44944	2.54e-12	3.79034	2.55e-06
Lacdel1|2296667	Lacdel1	2296667	gene_13728	Induced during mycorrhization	4 and 6 wpi	E	VII	NA	NA	NA	NA	NA	S53	non-cannonical region	3.4.14.9	Tripeptidyl-peptidase I.	PF09286,PF00082	Pro-kuma_activ,Peptidase_S8	NA	Protease	Sedolisin (S53)	OG0000008	0.073264	0.227616	0.294024	0.065532	0.098702	0.157103	10.2584	12.4931	11.6392	5.96112	2.00818	8.41198	-1.48074	1	6.4112	0.00240706	5.76166	0.0251934
Lacdel1|2296671	Lacdel1	2296671	gene_13733	Induced during mycorrhization	4 and 6 wpi	E	VII	NA	NA	NA	NA	NA	S53	non-cannonical region	3.4.14.9	Tripeptidyl-peptidase I.	PF09286	Pro-kuma_activ	NA	Protease	Sedolisin (S53)	OG0012239	0.14511	0.20174	0.154296	0.103913	0.214388	0.433268	7.69072	6.44631	6.92971	3.66326	2.97666	4.73348	1.18465	1	5.70455	5.69e-09	4.82888	4.81e-05
Lacdel1|2300168	Lacdel1	2300168	gene_16570	Induced during mycorrhization	4 and 6 wpi	E	VII	NA	NA	NA	NA	NA	S53	non-cannonical region	3.4.14.9	Tripeptidyl-peptidase I.	PF09286,PF00082	Pro-kuma_activ,Peptidase_S8	NA	Protease	Sedolisin (S53)	OG0000008	0.073264	0.284064	0.237836	0.135518	0.140139	0.157103	10.3088	13.4196	11.9833	5.59811	2.13209	8.22789	0.971341	1	6.64183	0.000866445	5.69504	0.0280235
Lacdel1|2300171	Lacdel1	2300171	gene_16572	Induced during mycorrhization	4 and 6 wpi	E	VII	Secreted	NA	NA	NA	NA	S53	non-cannonical region	3.4.14.9	Tripeptidyl-peptidase I.	PF09286	Pro-kuma_activ	NA	Protease	Sedolisin (S53)	OG0012239	0.028611	0.100467	0.051747	0.034475	0.113046	0.151636	4.21722	4.40573	3.531	2.81347	2.15114	2.36953	1.34372	1	7.40626	0.000542499	7.05439	0.00210327
Lacdel1|2300178	Lacdel1	2300178	gene_16574	Induced during mycorrhization	4 and 6 wpi	E	VII	NA	NA	NA	NA	NA	S53	partial non-cannonical region	3.4.14.9	Tripeptidyl-peptidase I.	PF09286	Pro-kuma_activ	NA	Protease	Sedolisin (S53)	OG0000102	0.17526	0.134463	0.122587	0.140528	0.1891	0.288468	21.4739	20.144	20.2842	10.8706	7.05527	15.2534	2.2724	1	10.4637	1.61e-10	9.49004	3.92e-08
Lacdel1|2302674	Lacdel1	2302674	gene_20333	Induced during mycorrhization	4 and 6 wpi	E	VII	Secreted	NA	NA	NA	NA	S53	non-cannonical region	3.4.14.9	Tripeptidyl-peptidase I.	PF09286	Pro-kuma_activ	NA	Protease	Sedolisin (S53)	OG0000998	0.533615	0.485812	0.571341	0.268563	0.328824	0.318997	10.0437	10.1689	15.175	14.1768	7.78685	12.4213	-0.845468	1	4.744	1.29e-10	4.65463	7.71e-10
Lacdel1|2302686	Lacdel1	2302686	gene_20352	Induced during mycorrhization	4 and 6 wpi	E	VII	Secreted	NA	NA	NA	NA	S53	cannonical region	3.4.14.9	Tripeptidyl-peptidase I.	PF09286	Pro-kuma_activ	NA	Protease	Sedolisin (S53)	OG0010528	0.562642	0.656456	0.450921	0.854173	0.518424	0.567941	8.07311	9.04687	8.69944	6.19291	5.88668	5.43764	0.12063	1	4.72014	1.61e-10	4.05751	8.94e-06
Lacdel1|2313464	Lacdel1	2313464	gene_4915	Induced during mycorrhization	6 wpi only	E	VII	Secreted	NA	NA	NA	NA	S53	non-cannonical region	3.4.14.9	Tripeptidyl-peptidase I.	PF09286	Pro-kuma_activ	NA	Protease	Sedolisin (S53)	OG0009125	0.242568	0.780876	0.529205	0.135386	0.073184	0.214294	3.7669	3.33304	3.16221	3.32328	3.46702	3.62714	-1.20575	1	3.12108	0.118499	3.33743	0.0231924
Lacdel1|2318643	Lacdel1	2318643	gene_11926	Induced during mycorrhization	4 wpi only	C	VII	Secreted	NA	NA	NA	NA	S53	partial non-cannonical region	3.4.14.9	Tripeptidyl-peptidase I.	PF09286,PF00082	Pro-kuma_activ,Peptidase_S8	NA	Protease	Sedolisin (S53)	OG0010132	9.22636	11.6304	10.6294	10.0521	11.4745	11.7858	50.0594	75.3583	54.343	50.3114	41.004	41.9268	0.224912	1	2.83693	2.04e-05	2.39528	0.444737
Lacdel1|2319078	Lacdel1	2319078	gene_12320	Induced during mycorrhization	6 wpi only	E	VII	NA	NA	NA	NA	NA	NA	NA	NA	NA	PF02171,PF08699,PF16488,PF16487,PF02170	Piwi,ArgoL1,ArgoL2,ArgoMid,PAZ	Translation, ribosomal structure and biogenesis	Other function	Piwi/argonaute	OG0008065	1.79551	3.45557	1.93786	1.05718	1.17685	1.09908	10.6753	8.10984	8.00279	21.4358	20.9626	14.4983	-1.06329	1	2.24825	1	3.35124	7.07e-06
Lacdel1|2320578	Lacdel1	2320578	gene_16401	Induced during mycorrhization	4 and 6 wpi	C	VII	Secreted	NA	NA	NA	NA	S53	non-cannonical region	3.4.14.9	Tripeptidyl-peptidase I.	PF09286	Pro-kuma_activ	NA	Protease	Sedolisin (S53)	OG0000848	2.56	2.499	2.32083	1.45383	2.35667	2.80419	15.7855	13.8447	13.1605	20.0596	19.1142	23.1895	-0.0266616	1	3.00667	0.000265486	3.53678	2.58e-10
Lacdel1|249226	Lacdel1	249226	gene_4965	Induced during mycorrhization	4 wpi only	E	VII	Secreted	NA	NA	NA	NA	S53	partial non-cannonical region	3.4.14.9	Tripeptidyl-peptidase I.	PF09286	Pro-kuma_activ	NA	Protease	Sedolisin (S53)	OG0000555	0.310447	0.316167	0.491537	0.085187	0.048871	0.099607	11.0941	6.94337	6.19146	2.96965	3.19493	2.31995	-3.60749	1	4.82179	1.49e-07	3.32658	0.183793
Lacdel1|2505101	Lacdel1	2505101	gene_5740	Induced during mycorrhization	4 and 6 wpi	E	VII	NA	NA	NA	NA	NA	S53	partial non-cannonical region	3.4.14.9	Tripeptidyl-peptidase I.	PF09286	Pro-kuma_activ	NA	Protease	Sedolisin (S53)	OG0000052	0.062479	0.18966	0.358677	0.267219	0.149779	0.285693	2.78442	3.23861	2.6217	3.16231	3.13431	3.18073	0.381611	1	4.9079	5.84e-05	4.9503	4.69e-05
Lacdel1|2505165	Lacdel1	2505165	gene_5992	Induced during mycorrhization	4 and 6 wpi	C	VII	Secreted	NA	NA	NA	NA	S53	partial non-cannonical region	3.4.14.9	Tripeptidyl-peptidase I.	PF09286	Pro-kuma_activ	NA	Protease	Sedolisin (S53)	OG0000698	0.407975	0.482123	0.339464	0.382942	0.245793	0.200264	26.1797	38.0589	38.5611	15.576	12.3241	21.4456	-0.153482	1	6.67289	1.25e-40	5.59297	1.4e-23
Lacdel1|2507733	Lacdel1	2507733	gene_11956	Induced during mycorrhization	4 and 6 wpi	C	VII	NA	NA	NA	NA	NA	S53	partial non-cannonical region	3.4.14.9	Tripeptidyl-peptidase I.	PF09286	Pro-kuma_activ	NA	Protease	Sedolisin (S53)	OG0004376	0.480944	0.308675	0.450566	0.685033	1.20752	0.651131	64.319	75.7184	51.3885	36.5657	23.9862	33.8874	1.3736	1	7.79675	2.81e-44	6.77268	1.22e-29
Lacdel1|2508926	Lacdel1	2508926	gene_23233	Induced during mycorrhization	6 wpi only	E	VII	Secreted	NA	NA	NA	NA	S53	partial non-cannonical region	3.4.14.9	Tripeptidyl-peptidase I.	PF09286	Pro-kuma_activ	NA	Protease	Sedolisin (S53)	OG0010777	0.258571	0.162451	0.187511	0.373029	0.525567	0.548863	6.74512	3.70109	4.32877	31.7366	15.021	29.513	1.701	1	4.81741	0.241977	7.38737	2.84e-05
Lacdel1|2509017	Lacdel1	2509017	gene_21695	Induced during mycorrhization	6 wpi only	C	VII	Secreted	NA	NA	NA	NA	S53	partial non-cannonical region	3.4.14.9	Tripeptidyl-peptidase I.	PF09286	Pro-kuma_activ	NA	Protease	Sedolisin (S53)	OG0000597	4.24782	4.1535	4.30993	3.32274	3.38634	3.44717	19.2911	25.6775	24.1707	28.8629	17.2161	41.9805	-0.360419	1	2.89068	0.0511911	3.14308	0.00245577
Lacdel1|2509147	Lacdel1	2509147	gene_22921	Induced during mycorrhization	4 and 6 wpi	C	VII	Secreted	NA	NA	NA	NA	S53	non-cannonical region	3.4.14.9	Tripeptidyl-peptidase I.	PF09286	Pro-kuma_activ	NA	Protease	Sedolisin (S53)	OG0000110	2.80651	3.4512	3.00825	1.43874	2.58056	1.86677	36.4287	49.6939	59.5737	24.8089	15.2334	78.2141	-0.511385	1	4.22074	0.00148492	3.90497	0.0157106
Lacdel1|2509587	Lacdel1	2509587	gene_19744	Induced during mycorrhization	4 and 6 wpi	C	VII	NA	NA	NA	NA	NA	S53	non-cannonical region	3.4.14.9	Tripeptidyl-peptidase I.	PF09286	Pro-kuma_activ	NA	Protease	Sedolisin (S53)	OG0009322	3.18963	4.05249	3.00425	4.30062	3.71091	4.18884	59.0123	70.1331	55.0991	53.9047	25.1866	74.88	0.488292	1	4.54463	2.46e-14	4.18139	1.92e-10
Lacdel1|2517179	Lacdel1	2517179	gene_4894	Induced during mycorrhization	4 and 6 wpi	E	VII	Secreted	NA	NA	NA	NA	S53	non-cannonical region	3.4.14.9	Tripeptidyl-peptidase I.	PF09286	Pro-kuma_activ	NA	Protease	Sedolisin (S53)	OG0000102	0.215341	0.159267	0.277565	0.133191	0	0.094166	7.45986	9.90356	9.40257	7.20354	4.70152	7.81738	-0.617065	1	6.21088	1.97e-06	5.78503	4.34e-05
Lacdel1|2517239	Lacdel1	2517239	gene_4962	Induced during mycorrhization	4 and 6 wpi	C	VII	Secreted	NA	NA	NA	NA	S53	non-cannonical region	3.4.14.9	Tripeptidyl-peptidase I.	PF09286	Pro-kuma_activ	NA	Protease	Sedolisin (S53)	OG0000555	1.79834	3.17572	2.74455	1.77876	1.72417	1.84456	67.1535	62.9391	70.7902	132.184	32.6725	63.1393	-0.429013	1	5.15019	1.95e-13	5.34314	4.69e-15
Lacdel1|2519035	Lacdel1	2519035	gene_7885	Induced during mycorrhization	4 wpi only	E	VII	Secreted	NA	NA	NA	NA	S53	partial non-cannonical region	3.4.14.9	Tripeptidyl-peptidase I.	PF09286	Pro-kuma_activ	NA	Protease	Sedolisin (S53)	OG0000269	1.13583	1.41559	0.855314	1.22886	2.1332	1.86777	7.62916	7.51378	8.82722	4.67181	3.91436	4.63782	0.686768	1	3.09181	0.00155713	2.25059	1
Lacdel1|2520279	Lacdel1	2520279	gene_8896	Induced during mycorrhization	4 and 6 wpi	J	VII	Secreted	NA	NA	NA	NA	S53	non-cannonical region	3.4.14.9	Tripeptidyl-peptidase I.	PF09286	Pro-kuma_activ	NA	Protease	Sedolisin (S53)	OG0012664	19.2878	21.9193	20.8825	16.2578	18.2733	17.8825	197.007	192.104	173.913	108.908	81.6386	127.001	-0.135563	1	3.58609	5.96e-20	2.7377	0.000339848
Lacdel1|2522047	Lacdel1	2522047	gene_10625	Induced during mycorrhization	4 and 6 wpi	C	VII	Secreted	NA	NA	NA	NA	S53	partial cannonical region	3.4.14.9	Tripeptidyl-peptidase I.	PF09286	Pro-kuma_activ	NA	Protease	Sedolisin (S53)	OG0003853	2.6893	1.46393	1.7865	1.57801	3.8377	2.15749	146.519	215.598	184.432	46.8204	32.7134	57.6644	0.360906	1	6.79778	8.09e-54	4.81814	2.97e-18
Lacdel1|2523975	Lacdel1	2523975	gene_10975	Induced during mycorrhization	4 and 6 wpi	E	VII	NA	NA	NA	NA	NA	NA	NA	NA	NA	NA	NA	Intracellular trafficking, secretion, and vesicular transport	Unknown	Unknown	OG0000759	0.745886	1.72392	0.341462	1.2293	1.41493	1.28117	19.2548	16.574	20.3963	13.3417	10.5901	9.05559	0.388462	1	4.75533	2.72e-09	3.96147	0.000168446
Lacdel1|2525783	Lacdel1	2525783	gene_13719	Induced during mycorrhization	4 wpi only	E	VII	Secreted	NA	NA	NA	NA	S53	non-cannonical region	3.4.14.9	Tripeptidyl-peptidase I.	PF09286,PF00082	Pro-kuma_activ,Peptidase_S8	NA	Protease	Sedolisin (S53)	OG0000102	2.01399	2.30225	2.40458	2.81293	1.47622	2.07356	17.2936	15.4786	13.2694	7.84801	7.26707	6.44212	0.364774	1	3.42245	1.04e-05	2.41295	1
Lacdel1|2527233	Lacdel1	2527233	gene_15552	Induced during mycorrhization	4 and 6 wpi	C	VII	NA	NA	NA	NA	NA	NA	NA	NA	NA	PF07690,PF00083	MFS_1,Sugar_tr	NA	Transporter/Permease	Sugar transporter	OG0002892	2.51721	2.29675	2.15659	45.5817	36.4597	48.9972	39.7816	37.0286	28.2312	171.766	72.6261	72.9246	4.35186	2.38e-08	4.2894	5.64e-10	5.89781	3.79e-29
Lacdel1|2529996	Lacdel1	2529996	gene_17168	Induced during mycorrhization	4 and 6 wpi	B	VII	Secreted	NA	NA	NA	NA	S53	non-cannonical region	3.4.14.9	Tripeptidyl-peptidase I.	PF09286	Pro-kuma_activ	NA	Protease	Sedolisin (S53)	OG0009261	3.40656	3.91998	3.89126	4.29654	4.18069	4.20046	131.539	109.081	86.7646	51.6619	34.8151	44.3531	0.253634	1	5.20502	1.15e-45	3.85966	5.18e-15
Lacdel1|2530117	Lacdel1	2530117	gene_16559	Induced during mycorrhization	4 wpi only	E	VII	Secreted	NA	NA	NA	NA	S53	non-cannonical region	3.4.14.9	Tripeptidyl-peptidase I.	PF09286	Pro-kuma_activ	NA	Protease	Sedolisin (S53)	OG0000102	0	0.218115	0.432648	0	0.287716	0.082363	2.5002	3.13833	2.55047	2.75554	2.40613	2.50644	-1.20325	1	3.49602	0.0367609	3.45316	0.0567837
Lacdel1|2531949	Lacdel1	2531949	gene_22927	Induced during mycorrhization	4 and 6 wpi	C	VII	Secreted	NA	NA	NA	NA	S53	non-cannonical region	3.4.14.9	Tripeptidyl-peptidase I.	PF09286	Pro-kuma_activ	NA	Protease	Sedolisin (S53)	OG0000110	1.30409	1.73615	0.901784	1.54313	1.65951	1.30565	24.4491	13.428	15.9623	17.8946	9.8386	32.8207	0.347402	1	4.01923	2.55e-05	4.11743	8.3e-06
Lacdel1|2538761	Lacdel1	2538761	gene_25378	Induced during mycorrhization	4 and 6 wpi	C	VII	Secreted	NA	NA	NA	NA	S53	non-cannonical region	3.4.14.9	Tripeptidyl-peptidase I.	PF09286	Pro-kuma_activ	NA	Protease	Sedolisin (S53)	OG0010856	1.52401	1.5088	1.71509	1.48311	2.00382	2.02782	17.1422	20.9398	18.1422	22.7775	15.6572	20.3408	0.44237	1	4.01102	1.25e-17	4.04972	3.02e-18
Lacdel1|2542566	Lacdel1	2542566	gene_8897	Induced during mycorrhization	4 and 6 wpi	E	VII	Secreted	NA	NA	NA	NA	S53	partial non-cannonical region	3.4.14.9	Tripeptidyl-peptidase I.	PF09286	Pro-kuma_activ	NA	Protease	Sedolisin (S53)	OG0012664	0.400137	0.320974	0.469295	0.148409	0.502429	0.348609	11.0504	18.4165	17.6087	5.98498	5.08506	21.5716	-0.19921	1	5.60302	5.69e-07	5.02411	8.05e-05
Lacdel1|2542567	Lacdel1	2542567	gene_8899	Induced during mycorrhization	4 wpi only	C	VII	Secreted	NA	NA	NA	NA	S53	partial cannonical region	3.4.14.9	Tripeptidyl-peptidase I.	PF09286	Pro-kuma_activ	NA	Protease	Sedolisin (S53)	OG0000074	6.02904	7.4202	6.37671	4.06312	6.89872	5.94163	41.371	39.023	44.2886	30.8249	20.6586	37.2637	-0.102957	1	3.01308	0.000299832	2.51489	0.561205
Lacdel1|2542912	Lacdel1	2542912	gene_8525	Induced during mycorrhization	4 and 6 wpi	E	VII	NA	NA	NA	NA	NA	S53	non-cannonical region	3.4.14.9	Tripeptidyl-peptidase I.	PF09286,PF00082	Pro-kuma_activ,Peptidase_S8	NA	Protease	Sedolisin (S53)	OG0000108	0.427767	0.198793	0.52174	0.625273	0.45288	0.995404	12.9959	11.3605	10.9232	7.6224	5.71613	8.8396	0.903017	1	5.38278	1.13e-18	4.70217	1.12e-11
Lacdel1|2543300	Lacdel1	2543300	gene_11382	Induced during mycorrhization	4 and 6 wpi	C	VII	Secreted	NA	NA	NA	NA	S53	non-cannonical region	3.4.14.9	Tripeptidyl-peptidase I.	PF09286	Pro-kuma_activ	NA	Protease	Sedolisin (S53)	OG0001253	0.776843	0.50848	0.806181	0.378274	0.827211	0.702945	99.82	67.8297	63.4983	25.9325	28.8259	37.5114	-0.0435789	1	7.00945	4.39e-54	5.67396	9.69e-29
Lacdel1|2543767	Lacdel1	2543767	gene_13822	Induced during mycorrhization	4 wpi only	E	VII	Secreted	NA	NA	NA	NA	S53	partial cannonical region	3.4.14.9	Tripeptidyl-peptidase I.	PF09286	Pro-kuma_activ	NA	Protease	Sedolisin (S53)	OG0002319	0.500262	0.633404	0.734379	0.543014	0.326783	1.0023	9.0712	7.02328	5.53024	5.076	2.88368	4.16899	-0.106714	1	3.97463	0.000109016	3.06737	0.345905
Lacdel1|2545067	Lacdel1	2545067	gene_20351	Induced during mycorrhization	4 wpi only	E	VII	Secreted	NA	NA	NA	NA	NA	NA	3.4.14.9	Tripeptidyl-peptidase I.	PF09286	Pro-kuma_activ	NA			OG0000035	2.62823	2.78274	1.86723	1.91553	3.02247	2.15369	13.2204	16.5866	15.576	11.7888	6.76413	13.496	-0.0537079	1	3.14978	0.00385365	2.64277	0.762592
Lacdel1|2556092	Lacdel1	2556092	gene_14696	Induced during mycorrhization	4 wpi only	E	VII	NA	NA	NA	NA	NA	NA	NA	NA	NA	NA	NA	Intracellular trafficking, secretion, and vesicular transport	Unknown	Unknown	OG0000759	0.781864	0.926314	0.517816	0.54272	0.947714	0.868167	11.8156	10.5131	9.47532	5.49758	6.34454	5.31798	-0.299589	1	4.04317	0.0440761	3.31836	0.994248
Lacdel1|2557291	Lacdel1	2557291	gene_23230	Induced during mycorrhization	4 and 6 wpi	C	VII	Secreted	NA	NA	NA	NA	S53	non-cannonical region	3.4.14.9	Tripeptidyl-peptidase I.	PF09286	Pro-kuma_activ	NA	Protease	Sedolisin (S53)	OG0002308	1.43893	1.4795	2.11032	2.35333	2.75786	2.26344	132.231	99.8027	67.0765	74.7818	41.203	54.4157	1.19905	1	6.68586	4.39e-22	5.63136	4.72e-13
Lacdel1|2565652	Lacdel1	2565652	gene_6172	Induced during mycorrhization	4 wpi only	E	VII	Secreted	NA	NA	NA	NA	S53	non-cannonical region	3.4.14.9	Tripeptidyl-peptidase I.	PF09286	Pro-kuma_activ	NA	Protease	Sedolisin (S53)	OG0004511	3.22758	2.7178	2.60763	1.47061	2.29047	1.68247	25.9693	23.0165	21.505	9.97046	5.98847	9.58515	-0.605328	1	3.23647	3.91e-07	1.79046	1
Lacdel1|2584500	Lacdel1	2584500	gene_8320	Induced during mycorrhization	4 and 6 wpi	E	VII	NA	NA	NA	NA	NA	S53	cannonical region	3.4.14.9	Tripeptidyl-peptidase I.	PF00082	Peptidase_S8	NA	Protease	Sedolisin (S53)	OG0012816	1.26157	1.60757	1.71968	1.42693	0.86649	1.04346	16.4398	22.9267	23.9049	9.36893	7.05125	14.6036	-0.275099	1	4.17502	2.97e-10	3.17971	0.00810981
Lacdel1|2584803	Lacdel1	2584803	gene_19916	Induced during mycorrhization	4 and 6 wpi	E	VII	Secreted	NA	NA	NA	NA	S53	partial non-cannonical region	3.4.14.9	Tripeptidyl-peptidase I.	PF09286	Pro-kuma_activ	NA	Protease	Sedolisin (S53)	OG0000035	0.313613	0.164231	0.363017	0.081758	0.1337	0.195062	4.98472	5.2911	4.46839	6.58504	2.30438	3.88435	-1.06859	1	4.49047	4.92e-06	4.19834	0.000133631
Lacdel1|2598406	Lacdel1	2598406	gene_9172	Induced during mycorrhization	4 and 6 wpi	C	VII	Secreted	NA	NA	NA	NA	S53	non-cannonical region	3.4.14.9	Tripeptidyl-peptidase I.	PF09286	Pro-kuma_activ	NA	Protease	Sedolisin (S53)	OG0000219	7.63108	8.1302	5.26802	11.5553	7.08229	8.87255	86.9111	81.8595	82.1711	89.9531	46.4653	58.4619	0.563779	1	4.03724	1.96e-12	3.65164	4.55e-08
Lacdel1|2602101	Lacdel1	2602101	gene_21215	Induced during mycorrhization	4 wpi only	C	VII	Secreted	NA	NA	NA	NA	S53	cannonical region	3.4.14.9	Tripeptidyl-peptidase I.	PF09286	Pro-kuma_activ	NA	Protease	Sedolisin (S53)	OG0002866	4.18383	5.39904	5.3038	2.77047	2.99002	3.07836	71.8956	107.919	114.346	14.8623	16.7059	63.3051	-0.728847	1	4.51668	2.86e-05	2.88499	1
Lacdel1|2606066	Lacdel1	2606066	gene_10040	Induced during mycorrhization	4 and 6 wpi	C	VII	Secreted	NA	NA	NA	NA	S53	partial non-cannonical region	3.4.14.9	Tripeptidyl-peptidase I.	PF09286	Pro-kuma_activ	NA	Protease	Sedolisin (S53)	OG0012753	5.49993	4.43772	4.73662	4.59012	4.20564	4.35203	17.457	15.0162	15.9291	21.0902	14.3573	11.6851	0.338924	1	4.90808	4.17e-14	4.85294	1.69e-13
Lacdel1|2606096	Lacdel1	2606096	gene_10043	Induced during mycorrhization	4 and 6 wpi	C	VII	Secreted	NA	NA	NA	NA	NA	NA	3.4.14.9	Tripeptidyl-peptidase I.	PF09286	Pro-kuma_activ	NA			OG0012821	1.25157	1.50679	1.15435	2.50213	2.16982	1.31028	26.0372	21.4012	22.5282	25.0903	15.4776	25.612	0.702563	1	4.57626	1.37e-17	4.46733	5.34e-16
Lacdel1|2648509	Lacdel1	2648509	gene_11922	Induced during mycorrhization	4 and 6 wpi	J	VII	NA	NA	NA	NA	NA	NA	NA	NA	NA	PF07690	MFS_1	Carbohydrate transport and metabolism	Transporter/Permease	Unknown transporter	OG0003669	20.6731	21.0752	19.3022	20.8081	22.1279	17.811	254.308	517.133	564.466	455.344	416.425	498.449	0.0896628	1	4.78259	3.21e-32	4.80448	1.64e-32
Lacdel1|2648644	Lacdel1	2648644	gene_11960	Induced during mycorrhization	4 wpi only	E	VII	Secreted	NA	NA	NA	NA	S53	partial non-cannonical region	3.4.14.9	Tripeptidyl-peptidase I.	PF09286	Pro-kuma_activ	NA	Protease	Sedolisin (S53)	OG0004376	1.07548	1.19348	1.62399	1.71737	1.8621	1.25953	20.1904	35.187	21.7299	4.94226	6.04549	9.39443	0.542989	1	4.75518	7.87e-19	2.85218	0.133779
Lacdel1|2669553	Lacdel1	2669553	gene_1172	Induced during mycorrhization	6 wpi only	E	VII	Secreted	NA	NA	NA	NA	NA	NA	NA	NA	PF01713,PF08590	Smr,DUF1771	Replication, recombination and repair	Other function	Holds a Smr domain	OG0010222	1.15062	2.82259	5.87939	0.928767	0.755757	1.51138	25.6751	22.9793	17.8923	33.6888	38.7158	31.0225	-1.43304	1	3.07882	0.106253	3.68158	0.000330525
Lacdel1|2672928	Lacdel1	2672928	gene_6174	Induced during mycorrhization	4 and 6 wpi	E	VII	Secreted	NA	NA	NA	NA	S53	non-cannonical region	3.4.14.9	Tripeptidyl-peptidase I.	PF09286	Pro-kuma_activ	NA	Protease	Sedolisin (S53)	OG0004511	0	0.230761	0.199134	0.085018	0.222944	0.134347	25.6823	25.6953	24.8327	12.2475	7.67775	14.5153	0.37923	1	7.75314	2.81e-25	6.62709	4.2e-16
Lacdel1|2673527	Lacdel1	2673527	gene_4966	Induced during mycorrhization	4 wpi only	E	VII	Secreted	NA	NA	NA	NA	S53	non-cannonical region	3.4.14.9	Tripeptidyl-peptidase I.	PF09286	Pro-kuma_activ	NA	Protease	Sedolisin (S53)	OG0000555	0.04211	0.289332	0.349854	0	0.132659	0.226636	3.94232	4.13022	2.62707	1.33254	1.50472	2.01232	-0.622813	1	4.86354	0.000940699	3.60881	0.520342
Lacdel1|2676965	Lacdel1	2676965	gene_11130	Induced during mycorrhization	4 and 6 wpi	C	VII	Secreted	NA	NA	NA	NA	S53	non-cannonical region	3.4.14.9	Tripeptidyl-peptidase I.	PF09286	Pro-kuma_activ	NA	Protease	Sedolisin (S53)	OG0000110	0.562817	0.793848	0.574069	0.510467	1.24509	0.815091	29.7542	37.8826	41.8819	19.8211	12.83	67.6658	1.01586	1	6.87889	1.05e-11	6.7591	4.72e-11
Lacdel1|2676966	Lacdel1	2676966	gene_11132	Induced during mycorrhization	4 and 6 wpi	C	VII	Secreted	NA	NA	NA	NA	S53	non-cannonical region	3.4.14.9	Tripeptidyl-peptidase I.	PF09286	Pro-kuma_activ	NA	Protease	Sedolisin (S53)	OG0000110	0.452511	0.800604	0.717055	1.12138	0.984277	0.634494	20.4258	16.2078	19.9401	17.8268	10.219	49.3857	1.05514	1	5.89134	2.37e-07	6.3442	4.2e-09
Lacdel1|2681339	Lacdel1	2681339	gene_23329	Induced during mycorrhization	4 and 6 wpi	E	VII	Secreted	NA	NA	NA	NA	S53	cannonical region	3.4.14.9	Tripeptidyl-peptidase I.	PF09286	Pro-kuma_activ	NA	Protease	Sedolisin (S53)	OG0010528	0.534634	0.592695	0.333278	0.440859	0.495867	0.409705	7.28643	7.6232	7.59173	5.86951	4.93945	6.64867	-1.31892	1	4.88891	2.67e-08	4.47282	6.41e-06
Lacdel1|2682405	Lacdel1	2682405	gene_19745	Induced during mycorrhization	4 and 6 wpi	C	VII	Secreted	NA	NA	NA	NA	S53	partial non-cannonical region	3.4.14.9	Tripeptidyl-peptidase I.	PF09286	Pro-kuma_activ	NA	Protease	Sedolisin (S53)	OG0000597	3.53407	3.69937	3.71762	3.73141	2.93737	3.17551	17.5443	21.3144	20.5052	26.2039	17.3371	34.8456	0.000711775	1	2.83394	0.0295358	3.22921	5.21e-05
Lacdel1|335676	Lacdel1	335676	gene_17169	Induced during mycorrhization	4 wpi only	C	VII	NA	NA	NA	NA	NA	S53	non-cannonical region	3.4.14.9	Tripeptidyl-peptidase I.	PF09286	Pro-kuma_activ	NA	Protease	Sedolisin (S53)	OG0009111	6.03573	7.81174	7.8747	9.46341	10.6383	9.42693	65.9693	74.86	47.7541	15.8878	13.6809	15.3733	0.556076	1	3.53471	2.87e-14	1.41145	1
Lacdel1|348209	Lacdel1	348209	gene_16560	Induced during mycorrhization	4 wpi only	E	VII	Secreted	NA	NA	NA	NA	S53	non-cannonical region	3.4.14.9	Tripeptidyl-peptidase I.	PF09286,PF00082	Pro-kuma_activ,Peptidase_S8	NA	Protease	Sedolisin (S53)	OG0000102	1.76257	2.40161	2.50987	2.34596	1.06042	1.43171	15.5067	11.9471	12.347	7.14601	5.60244	5.10719	-0.3788	1	3.12362	0.0269938	1.98798	1
Lacdel1|364506	Lacdel1	364506	gene_7291	Induced during mycorrhization	4 wpi only	C	VII	Secreted	NA	NA	NA	NA	S53	cannonical region	3.4.14.9	Tripeptidyl-peptidase I.	PF09286	Pro-kuma_activ	NA	Protease	Sedolisin (S53)	OG0002866	2.47084	3.80559	3.67451	1.91123	1.80857	1.85908	61.2366	101.142	99.9913	13.8521	14.3782	57.9998	-0.679586	1	5.16274	2.15e-07	3.57844	0.101548
Lacdel1|478929	Lacdel1	478929	gene_21696	Induced during mycorrhization	4 and 6 wpi	C	VII	NA	NA	NA	NA	NA	S53	non-cannonical region	3.4.14.9	Tripeptidyl-peptidase I.	PF09286	Pro-kuma_activ	NA	Protease	Sedolisin (S53)	OG0009322	2.02242	2.81907	2.07868	2.09922	1.84826	2.06365	36.8406	47.8601	38.7531	38.0101	20.7693	64.2202	-0.173053	1	4.64692	3.31e-13	4.64682	3.95e-13
Lacdel1|540893	Lacdel1	540893	gene_22930	Induced during mycorrhization	4 and 6 wpi	E	VII	Secreted	NA	NA	NA	NA	S53	non-cannonical region	3.4.14.9	Tripeptidyl-peptidase I.	PF09286	Pro-kuma_activ	NA	Protease	Sedolisin (S53)	OG0000110	0.708139	0.980066	0.643883	0.354314	0.579903	0.746966	11.0014	6.13974	10.89	7.21095	4.51176	14.2234	-0.327815	1	3.89013	0.00032579	3.70202	0.00245402
Lacdel1|72850	Lacdel1	72850	gene_5971	Induced during mycorrhization	4 wpi only	C	VII	Secreted	NA	NA	NA	NA	NA	NA	3.4.14.9	Tripeptidyl-peptidase I.	PF09286	Pro-kuma_activ	NA			OG0000720	7.1554	5.97438	6.27652	4.12175	5.45243	4.83676	41.2293	71.3309	72.0782	14.3613	18.0283	31.1605	-0.357668	1	3.5814	1.36e-07	2.06392	1
Lacdel1|75694	Lacdel1	75694	gene_6019	Induced during mycorrhization	4 and 6 wpi	E	VII	Secreted	NA	NA	NA	NA	S53	non-cannonical region	3.4.14.9	Tripeptidyl-peptidase I.	PF09286	Pro-kuma_activ	NA	Protease	Sedolisin (S53)	OG0000085	0.39593	0.459581	0.407324	0.290193	0.226258	0.461681	6.67485	6.41275	7.44542	4.19238	4.23408	4.95425	0.186715	1	4.44236	3.2e-07	4.07696	4.56e-05
Lacdel1|90556	Lacdel1	90556	gene_14147	Induced during mycorrhization	4 and 6 wpi	E	VII	Secreted	NA	NA	NA	NA	S53	partial non-cannonical region	3.4.14.9	Tripeptidyl-peptidase I.	PF09286	Pro-kuma_activ	NA	Protease	Sedolisin (S53)	OG0003666	1.34961	1.19152	1.20481	1.19793	1.62583	1.31338	28.0677	22.5265	20.3603	14.6559	7.60331	11.6422	0.100563	1	4.75129	1.45e-19	3.64097	9.82e-07
Lacdel1|906979	Lacdel1	906979	gene_10045	Induced during mycorrhization	4 and 6 wpi	C	VII	Secreted	NA	NA	NA	NA	S53	non-cannonical region	3.4.14.9	Tripeptidyl-peptidase I.	PF09286	Pro-kuma_activ	NA	Protease	Sedolisin (S53)	OG0012930	1.63764	1.46296	2.12477	0.691332	1.26956	0.760318	90.2996	78.0466	85.0761	76.4252	34.7507	71.9978	-0.734661	1	5.99038	7.77e-38	5.49933	6.62e-29
Lacdel1|908158	Lacdel1	908158	gene_10064	Induced during mycorrhization	4 and 6 wpi	E	VII	Secreted	NA	NA	NA	NA	S53	partial non-cannonical region	3.4.14.9	Tripeptidyl-peptidase I.	PF09286	Pro-kuma_activ	NA	Protease	Sedolisin (S53)	OG0000455	0.113508	0.046922	0.202616	0.260225	0.206727	0.337526	4.28317	3.50973	3.37653	4.12485	4.05377	3.75843	0.597983	1	5.49476	2.03e-06	5.34258	8.65e-06
Lacdel1|954731	Lacdel1	954731	gene_2804	Induced during mycorrhization	4 wpi only	C	VII	Secreted	NA	NA	NA	NA	S53	partial non-cannonical region	3.4.14.9	Tripeptidyl-peptidase I.	PF09286	Pro-kuma_activ	NA	Protease	Sedolisin (S53)	OG0009075	2.87442	2.93639	3.30403	1.82301	2.80696	2.5396	35.6301	24.5257	19.1521	27.1705	9.78255	25.7881	-0.20894	1	3.44247	0.00139083	3.06565	0.0749187
Lacdel1|MSTRG.3282	Lacdel1	NA	MSTRG.3282	Induced during mycorrhization	4 and 6 wpi	E	VII	NA	NA	NA	NA	NA	NA	NA	NA	NA	NA	NA	NA			OG0000086	0.155252	0.253011	0.108701	0.058489	0.19361	0.181959	10.4974	10.9518	12.5881	9.97789	3.71141	14.8079	-0.10749	1	6.34555	2.14e-13	6.08888	8.8e-12
Lacdel1|MSTRG.4497	Lacdel1	NA	MSTRG.4497	Induced during mycorrhization	4 and 6 wpi	J	VII	NA	NA	NA	NA	NA	NA	NA	NA	NA	PF09286	Pro-kuma_activ	NA			OG0010950	15.6188	18.6811	19.4994	34.3863	27.528	31.1463	84.4185	107.8	148.975	108.962	146.342	164.232	1.04093	1	3.24208	3.1e-07	3.50065	1.61e-10
Lacdel1|MSTRG.5887	Lacdel1	NA	MSTRG.5887	Induced during mycorrhization	4 and 6 wpi	E	VII	NA	NA	NA	NA	NA	NA	NA	NA	NA	PF09286	Pro-kuma_activ	NA			OG0010964	0.082375	0.0497	0.015439	0.059857	0	0.208635	16.1406	14.5453	12.7931	7.91578	5.2749	7.84161	1.19014	1	8.68825	9.37e-17	7.61281	1.11e-11
Lacdel1|MSTRG.5902	Lacdel1	NA	MSTRG.5902	Induced during mycorrhization	4 and 6 wpi	E	VII	NA	NA	NA	NA	NA	NA	NA	NA	NA	PF09286	Pro-kuma_activ	NA			OG0000086	0.473447	0.634203	0.298225	0.450039	0.735964	0.611472	4.14603	7.28077	8.76132	4.60257	2.93166	9.87469	0.58655	1	4.39011	3.74e-06	4.15563	6.43e-05
Lacdel1|MSTRG.5906	Lacdel1	NA	MSTRG.5906	Induced during mycorrhization	6 wpi only	C	VII	NA	NA	NA	NA	NA	NA	NA	NA	NA	NA	NA	NA	Protease	Sedolisin related (S53)	OG0000086	7.39242	8.54866	8.25349	9.69061	8.9687	9.38986	12.9616	14.3328	15.0167	13.3028	15.9473	14.7592	0.369421	1	2.34576	1	2.74506	0.00486712
Lacdel1|MSTRG.8281	Lacdel1	NA	MSTRG.8281	Induced during mycorrhization	4 wpi only	E	VII	Secreted	NA	NA	NA	NA	NA	NA	NA	NA	PF09286	Pro-kuma_activ	NA			OG0009423	2.33603	2.40338	1.94439	2.36968	2.01607	2.13218	8.18919	6.99869	6.43561	5.18209	3.72751	4.1816	0.130756	1	3.03832	0.00269463	2.02955	1
Lacdel1|MSTRG.9729	Lacdel1	NA	MSTRG.9729	Induced during mycorrhization	4 and 6 wpi	E	VII	NA	NA	NA	NA	NA	NA	NA	NA	NA	PF09286	Pro-kuma_activ	NA			OG0000086	0.442335	0.411746	0.273318	0.196024	0.183694	0.241469	9.47771	11.4758	9.24816	4.2587	2.78578	4.47728	-0.616151	1	5.17828	1.06e-14	3.6972	0.000710953
Lacdel1|1061031	Lacdel1	1061031	gene_8629	Induced during mycorrhization	4 wpi only	J	VIII	NA	NA	CBM21	NA	NA	NA	NA	NA	NA	PF03370,PF16760	CBM_21,CBM53	Posttranslational modification, protein turnover, chaperones ; Signal transduction mechanisms	CAZyme	Holds a CBM domain	OG0001238	32.5583	34.975	37.8962	22.164	28.5644	29.105	155.528	248.825	224.062	79.5237	85.6546	127.289	-0.206615	1	3.02152	3.26e-06	1.89859	1
Lacdel1|1123766	Lacdel1	1123766	gene_13303	Induced during mycorrhization	4 wpi only	C	VIII	Secreted	NA	NA	NA	NA	NA	NA	NA	NA	PF09362	DUF1996	NA	Unknown	Unknown	OG0004294	2.46628	2.40862	2.08157	2.35305	3.77046	4.37111	32.5995	49.4358	55.9859	30.4031	9.53067	11.1407	0.595506	1	4.58679	9.03e-09	3.13163	0.155918
Lacdel1|1123888	Lacdel1	1123888	gene_13305	Induced during mycorrhization	4 and 6 wpi	J	VIII	Secreted	NA	NA	NA	NA	NA	NA	NA	NA	PF09362	DUF1996	NA	Unknown	Unknown	OG0014903	13.6486	15.3427	20.5432	83.5724	83.9036	107.276	151.833	124.429	148.141	113.105	75.9787	94.1034	2.5263	1	3.5087	1.09e-10	2.91076	0.00088276
Lacdel1|1158296	Lacdel1	1158296	gene_9020	Induced during mycorrhization	4 and 6 wpi	C	VIII	NA	NA	NA	NA	NA	NA	NA	NA	NA	NA	NA	NA	Unknown	Unknown	OG0012018	1.5531	0.802097	0.838081	2.32051	3.12994	4.47606	30.3539	40.4478	51.5057	32.292	22.1622	29.932	1.87977	1	5.80674	1.23e-16	5.34027	1.19e-12
Lacdel1|1167895	Lacdel1	1167895	gene_22089	Induced during mycorrhization	6 wpi only	E	VIII	Secreted	NA	NA	NA	NA	NA	NA	NA	NA	PF16335,PF17168,PF08760	DUF4965,DUF5127,DUF1793	NA	Unknown	Unknown	OG0000056	1.07852	1.1762	0.969038	0.637571	0.648083	0.973878	4.32027	6.10541	5.44236	8.96232	8.19577	8.41178	-0.312612	1	2.68224	0.0655247	3.3206	1.22e-07
Lacdel1|132822	Lacdel1	132822	gene_3850	Induced during mycorrhization	6 wpi only	E	VIII	NA	NA	NA	NA	NA	NA	NA	NA	NA	PF00651	BTB	NA	Transcription factor	Holds a BTB domain	OG0004931	1.82158	2.77419	1.7343	1.18479	1.66872	1.27125	8.61822	11.2759	7.31394	33.1978	107.774	56.3777	-0.384232	1	2.58929	1	5.41734	1.76e-17
Lacdel1|134402	Lacdel1	134402	gene_3864	Induced during mycorrhization	4 and 6 wpi	J	VIII	NA	NA	NA	NA	NA	NA	NA	1.14.13.-	With NADH or NADPH as one donor, and incorporation of one atom	PF00067	p450	Secondary metabolites biosynthesis, transport and catabolism	Cytochrome p450		OG0007349	17.2632	17.7023	17.9376	22.6513	26.7798	27.2072	301.447	516.359	636.73	311.759	329.738	507.876	0.672977	1	5.19619	1.16e-37	4.85492	7.88e-30
Lacdel1|1388274	Lacdel1	1388274	gene_12149	Induced during mycorrhization	4 and 6 wpi	B	VIII	NA	NA	GH47	NA	NA	NA	NA	3.2.1.113	Mannosyl-oligosaccharide 1,2-alpha-mannosidase.	PF01532	Glyco_hydro_47	Carbohydrate transport and metabolism	CAZyme	Glycoside Hydrolase	OG0000735	8.26903	7.73772	9.17559	8.60816	10.0518	10.5768	156.554	143.061	174.566	138.862	73.1974	190.875	0.371865	1	4.45768	7.33e-19	4.25439	9.31e-16
Lacdel1|140235	Lacdel1	140235	gene_3930	Induced during mycorrhization	6 wpi only	C	VIII	NA	NA	NA	NA	NA	NA	NA	NA	NA	NA	NA	NA	Unknown	Unknown	OG0006428	4.37573	3.91404	3.03052	2.91413	4.67121	3.5971	17.0946	13.5695	35.0459	28.5259	19.4474	36.4814	0.235581	1	3.08679	0.0661764	3.42773	0.00262394
Lacdel1|140472	Lacdel1	140472	gene_3933	Induced during mycorrhization	4 wpi only	E	VIII	NA	NA	NA	NA	NA	NA	NA	NA	NA	NA	NA	NA	Unknown	Unknown	OG0006427	1.15635	1.28661	1.12752	1.25801	1.68247	1.63093	7.41882	8.64708	10.1423	5.94837	4.18333	5.74264	0.413888	1	3.21257	0.00333519	2.53159	1
Lacdel1|1448503	Lacdel1	1448503	gene_11155	Induced during mycorrhization	4 and 6 wpi	B	VIII	Secreted	NA	NA	NA	NA	NA	NA	1.14.14.1	Unspecific monooxygenase.	PF00067	p450	Secondary metabolites biosynthesis, transport and catabolism	Cytochrome p450		OG0010365	1.77303	1.69464	1.76937	1.88659	2.52426	2.38216	148.065	453.909	445.874	242.385	178.165	298.545	0.190892	1	8.08176	1.3e-51	7.56654	5.31e-43
Lacdel1|1526351	Lacdel1	1526351	gene_3667	Induced during mycorrhization	4 and 6 wpi	J	VIII	NA	NA	NA	NA	13c4__5ID8 Oyster lectin	NA	NA	NA	NA	PF11901	DUF3421	NA	Lectin	Oyster lectin	OG0004762	9.07109	11.2109	10.338	10.2195	13.8153	16.2739	140.725	201.687	223.585	75.7048	84.439	62.8456	0.519636	1	4.62352	2.24e-36	3.26386	3.22e-08
Lacdel1|15305	Lacdel1	15305	gene_1063	Induced during mycorrhization	4 and 6 wpi	J	VIII	NA	NA	NA	NA	NA	NA	NA	NA	NA	PF11710	Git3	NA	Other function	G protein-coupled glucose receptor	OG0008906	14.473	15.6357	14.1309	14.3843	11.1012	11.0732	84.6149	56.6398	71.6636	130.7	174.902	156.076	-0.197726	1	2.67051	0.0248608	3.75957	1.63e-16
Lacdel1|1559966	Lacdel1	1559966	gene_10663	Induced during mycorrhization	4 and 6 wpi	C	VIII	Secreted	NA	AA3_2	PartialPCWdegradation	NA	NA	NA	1.1.99.1	Choline dehydrogenase.	PF00732,PF05199	GMC_oxred_N,GMC_oxred_C	General function prediction only	CAZyme	GMC oxidoreductase	OG0000343	5.13051	4.42334	5.65115	5.10861	7.11142	11.8963	50.9973	35.7454	28.697	36.7805	31.3587	36.1368	0.829833	1	3.53152	1.53e-05	3.34889	0.000320427
Lacdel1|1613392	Lacdel1	1613392	gene_14454	Induced during mycorrhization	6 wpi only	C	VIII	NA	NA	NA	NA	NA	NA	NA	1.3.3.6	Acyl-CoA oxidase.	PF02770	Acyl-CoA_dh_M	Lipid transport and metabolism ; Secondary metabolites biosynthesis, transport and catabolism	Other function	Acyl-CoA oxidase.	OG0001828	11.1524	11.4393	11.8994	8.33134	9.76089	8.45342	6.69538	5.14002	4.80663	169.749	129.305	111.609	-0.250929	1	-0.6251	1	4.0955	4.7e-29
Lacdel1|1716137	Lacdel1	1716137	gene_14287	Induced during mycorrhization	6 wpi only	E	VIII	NA	NA	NA	NA	NA	NA	NA	6.3.2.19	Ubiquitin--protein ligase.	PF13639,PF00097,PF13445,PF14634	zf-RING_2,zf-C3HC4,zf-RING_UBOX,zf-RING_5	Posttranslational modification, protein turnover, chaperones	Transcription factor	Ubiquitin--protein ligase.	OG0009722	0.064178	0.284136	0.523444	0.109999	0.696238	1.16	9.54116	4.44425	6.12523	11.8664	32.5009	51.6949	0.971816	1	4.67408	0.0954347	6.89581	4.95e-06
Lacdel1|1719169	Lacdel1	1719169	gene_14324	Induced during mycorrhization	4 and 6 wpi	C	VIII	NA	NA	NA	NA	NA	NA	NA	NA	NA	PF07690,PF00083	MFS_1,Sugar_tr	General function prediction only	Transporter/Permease	Sugar transporter	OG0012083	0.947612	1.38508	1.0392	3.47974	2.23934	2.07699	43.4283	46.86	43.0402	29.4716	20.3363	31.9125	1.4885	1	5.99968	1.48e-44	5.26905	2.62e-29
Lacdel1|1802148	Lacdel1	1802148	gene_5385	Induced during mycorrhization	4 wpi only	J	VIII	NA	NA	NA	NA	NA	NA	NA	NA	NA	PF00096,PF13465,PF13894	zf-C2H2,zf-H2C2_2,zf-C2H2_4	Transcription	Transcription factor	Holds a zinc finger domain	OG0002956	30.5058	31.1731	29.2577	24.3587	22.0624	23.8346	226.328	144.842	133.269	75.0974	75.3501	64.02	0.0051468	1	3.09478	0.000638592	1.75236	1
Lacdel1|1887989	Lacdel1	1887989	gene_4509	Induced during mycorrhization	4 and 6 wpi	B	VIII	NA	NA	NA	NA	NA	NA	NA	NA	NA	PF01794,PF08030,PF08022	Ferric_reduct,NAD_binding_6,FAD_binding_8	Inorganic ion transport and metabolism ; Secondary metabolites biosynthesis, transport and catabolism	Other function	Feric reductase	OG0004012	2.01152	2.87165	2.16193	2.42934	5.11552	3.35834	136.3	79.6956	82.4409	150.988	68.5709	68.7921	0.728879	1	5.79368	7.07e-23	5.70754	9.17e-22
Lacdel1|1897130	Lacdel1	1897130	gene_16925	Induced during mycorrhization	4 wpi only	J	VIII	NA	NA	NA	NA	NA	NA	NA	NA	NA	PF00096,PF13465,PF13894	zf-C2H2,zf-H2C2_2,zf-C2H2_4	Transcription	Transcription factor	Holds a zinc finger domain	OG0002956	29.3522	29.5089	27.0174	22.6148	18.656	20.9878	204.538	126.917	122.486	75.5189	71.296	62.8526	-0.240165	1	2.85847	0.0403269	1.96238	1
Lacdel1|195487	Lacdel1	195487	gene_4561	Induced during mycorrhization	4 and 6 wpi	J	VIII	Secreted	NA	GH16	Glucan	NA	NA	NA	NA	NA	NA	NA	NA	CAZyme	Glycoside Hydrolase	OG0008765	7.01169	9.90053	8.69	11.0733	12.7485	13.6631	429.642	396.932	724.541	544.819	119.789	646.137	0.67783	1	6.20528	4.09e-13	5.96012	1.46e-11
Lacdel1|1982735	Lacdel1	1982735	gene_15546	Induced during mycorrhization	6 wpi only	C	VIII	NA	NA	NA	NA	NA	NA	NA	2.1.1.110	Sterigmatocystin 7-O-methyltransferase.	PF00891	Methyltransf_2	General function prediction only	Other function	Methyltransferase	OG0008742	9.84756	12.5234	9.29258	12.6231	13.329	12.6204	28.5695	33.9511	56.2137	40.0128	62.198	99.5449	0.430211	1	2.34692	1	3.08794	0.0103183
Lacdel1|1992186	Lacdel1	1992186	gene_15310	Induced during mycorrhization	4 and 6 wpi	B	VIII	NA	NA	NA	NA	NA	NA	NA	NA	NA	PF00172	Zn_clus	NA	Transcription factor	Holds a zinc finger domain	OG0004301	6.78711	7.78282	7.42458	5.93383	7.27514	6.58219	125.585	124.548	77.4465	136.992	103.081	41.1777	0.0203968	1	4.36704	5.6e-10	4.1258	5.97e-08
Lacdel1|1993980	Lacdel1	1993980	gene_19806	Induced during mycorrhization	4 wpi only	C	VIII	NA	NA	NA	NA	NA	NA	NA	1.14.14.1	Unspecific monooxygenase.	PF00067	p450	Secondary metabolites biosynthesis, transport and catabolism	Cytochrome p450		OG0002742	2.16445	3.05284	2.77488	2.89062	2.56851	4.22141	36.9894	24.3895	23.1117	18.1647	9.35709	11.3525	0.545439	1	4.24047	2.11e-09	3.03035	0.0780004
Lacdel1|1994034	Lacdel1	1994034	gene_19807	Induced during mycorrhization	4 and 6 wpi	C	VIII	NA	NA	NA	NA	NA	NA	NA	1.14.14.1	Unspecific monooxygenase.	PF00067	p450	Secondary metabolites biosynthesis, transport and catabolism	Cytochrome p450		OG0000572	2.12959	2.6575	1.56867	1.41165	2.13519	3.93768	42.5441	35.6596	36.4439	33.0373	20.5071	19.0826	0.507383	1	4.63434	2.75e-16	3.95109	9.32e-09
Lacdel1|2169044	Lacdel1	2169044	gene_8246	Induced during mycorrhization	4 wpi only	C	VIII	NA	NA	NA	NA	NA	NA	NA	NA	NA	PF00651	BTB	NA	Transcription factor	Holds a BTB domain	OG0000096	0.963543	2.09452	1.18912	0.652385	1.08314	1.09433	253.487	223.444	55.0796	15.1401	70.0837	5.5647	-1.27855	1	7.50091	7.84e-07	4.87309	0.0965982
Lacdel1|2213586	Lacdel1	2213586	gene_13	Induced during mycorrhization	4 wpi only	J	VIII	NA	NA	NA	NA	NA	NA	NA	NA	NA	PF00067	p450	Secondary metabolites biosynthesis, transport and catabolism	Cytochrome p450		OG0004053	18.9374	22.806	22.7567	18.5417	25.5588	29.7113	175.086	121.01	128.849	50.9264	50.3662	52.7569	0.296125	1	3.15059	2.06e-06	1.56033	1
Lacdel1|2214924	Lacdel1	2214924	gene_9	Induced during mycorrhization	4 and 6 wpi	C	VIII	NA	NA	NA	NA	NA	NA	NA	NA	NA	NA	NA	NA	Unknown	Unknown	OG0003900	2.58775	3.27454	1.92736	3.2336	6.15209	8.61458	70.842	58.8386	71.8184	23.4216	20.6789	43.6881	1.22848	1	5.03195	1.39e-15	3.85466	1.16e-05
Lacdel1|2225519	Lacdel1	2225519	gene_9021	Induced during mycorrhization	4 and 6 wpi	C	VIII	NA	NA	NA	NA	NA	NA	NA	NA	NA	PF00067	p450	Secondary metabolites biosynthesis, transport and catabolism	Cytochrome p450		OG0000315	1.29246	0.587533	0.582573	4.46125	5.40747	6.51417	56.2167	67.7535	68.4497	37.6377	31.737	41.1642	3.18561	1	7.1617	6.24e-37	6.35798	5.49e-26
Lacdel1|2226344	Lacdel1	2226344	gene_10388	Induced during mycorrhization	4 wpi only	C	VIII	NA	NA	NA	NA	NA	NA	NA	NA	NA	PF10250	O-FucT	NA	Other function	GDP-fucose protein O-fucosyltransferase	OG0002183	10.2352	11.4981	9.85579	10.7561	11.6197	11.854	84.1986	64.2713	67.527	50.3408	31.4257	37.771	0.290625	1	3.21743	4.47e-07	2.2786	1
Lacdel1|2227147	Lacdel1	2227147	gene_11180	Induced during mycorrhization	4 and 6 wpi	B	VIII	Secreted	NA	NA	NA	NA	NA	NA	NA	NA	PF00067	p450	Secondary metabolites biosynthesis, transport and catabolism	Cytochrome p450		OG0000043	4.59495	5.9512	5.25739	5.4763	4.15663	6.40538	156.969	128.781	113.687	52.9316	59.5438	58.361	0.057357	1	5.05627	1.89e-47	3.79619	5.98e-16
Lacdel1|2227161	Lacdel1	2227161	gene_11161	Induced during mycorrhization	4 wpi only	C	VIII	NA	NA	NA	NA	NA	NA	NA	1.14.14.1	Unspecific monooxygenase.	PF00067	p450	Secondary metabolites biosynthesis, transport and catabolism	Cytochrome p450		OG0000043	10.5608	6.48194	8.49905	8.22662	9.58899	8.96328	45.8358	46.509	41.0479	28.3071	36.2129	43.8071	0.178387	1	2.70445	0.0220488	2.41436	1
Lacdel1|2227888	Lacdel1	2227888	gene_11656	Induced during mycorrhization	4 and 6 wpi	J	VIII	Secreted	NA	NA	NA	NA	NA	NA	1.14.18.1	Monophenol monooxygenase.	PF00264	Tyrosinase	NA	Other function	Tyrosinase	OG0004296	15.5191	17.4441	15.3809	10.4016	8.43942	12.7384	318.542	298.194	301.603	141.11	113.935	110.275	-0.497517	1	4.65343	6.18e-67	3.30085	1.29e-15
Lacdel1|2227902	Lacdel1	2227902	gene_11662	Induced during mycorrhization	6 wpi only	C	VIII	Secreted	NA	NA	NA	NA	NA	NA	1.14.18.1	Monophenol monooxygenase.	PF00264	Tyrosinase	NA	Other function	Tyrosinase	OG0004296	4.22068	5.30571	5.3403	7.5796	8.39115	8.49414	17.6793	26.9588	33.5926	35.2127	60.244	31.5269	0.760436	1	2.62896	0.780126	3.26942	0.000997738
Lacdel1|2227908	Lacdel1	2227908	gene_11659	Induced during mycorrhization	4 and 6 wpi	C	VIII	Secreted	NA	NA	NA	NA	NA	NA	1.14.18.1	Monophenol monooxygenase.	PF00264	Tyrosinase	NA	Other function	Tyrosinase	OG0002206	4.34762	3.81877	2.88613	10.7191	5.91395	9.90021	27.4637	26.9274	41.5854	50.3406	41.4769	33.8643	1.16753	1	3.18907	0.000819777	3.52557	2.62e-06
Lacdel1|2229415	Lacdel1	2229415	gene_12299	Induced during mycorrhization	4 and 6 wpi	E	VIII	NA	NA	NA	NA	NA	NA	NA	NA	NA	NA	NA	NA	Unknown	Unknown	OG0002785	0.484757	0.13508	0.611735	0.556286	0	0.303589	4.87614	10.3155	9.84007	4.53465	7.61698	16.8845	-0.204415	1	4.88239	0.000676665	5.04435	0.00025459
Lacdel1|2231067	Lacdel1	2231067	gene_19801	Induced during mycorrhization	4 wpi only	J	VIII	NA	NA	NA	NA	NA	NA	NA	NA	NA	PF00067	p450	Secondary metabolites biosynthesis, transport and catabolism	Cytochrome p450		OG0004053	13.7803	17.8715	14.6017	18.7102	22.1477	26.1033	179.788	117.448	113.08	59.0212	55.3598	52.565	0.886119	1	3.92396	1.26e-14	2.56861	0.394984
Lacdel1|2231085	Lacdel1	2231085	gene_19803	Induced during mycorrhization	4 wpi only	C	VIII	NA	NA	NA	NA	NA	NA	NA	NA	NA	NA	NA	NA	Unknown	Unknown	OG0003900	4.87022	5.98184	5.86883	7.40604	11.1643	16.0342	93.9683	75.8108	94.9106	27.0663	28.1208	52.2564	1.14992	1	4.20184	1.85e-12	2.88203	0.0767336
Lacdel1|2232620	Lacdel1	2232620	gene_15450	Induced during mycorrhization	4 and 6 wpi	C	VIII	Secreted	NA	NA	NA	NA	NA	NA	1.14.18.1	Monophenol monooxygenase.	PF00264	Tyrosinase	NA	Other function	Tyrosinase	OG0004296	3.36935	4.81075	5.64124	5.63075	5.68065	6.09078	20.1523	29.5463	40.5416	36.4842	63.2351	38.3316	0.255777	1	3.02312	0.0321288	3.58635	1.9e-05
Lacdel1|2232960	Lacdel1	2232960	gene_15389	Induced during mycorrhization	4 wpi only	C	VIII	NA	NA	NA	NA	NA	NA	NA	NA	NA	PF10250	O-FucT	NA	Other function	GDP-fucose protein O-fucosyltransferase	OG0002183	7.44887	9.98036	7.19055	8.10744	8.74729	8.97862	60.1591	51.9708	50.6924	39.6179	29.462	31.0494	0.195325	1	3.14669	1.41e-08	2.36786	0.985913
Lacdel1|2236405	Lacdel1	2236405	gene_21716	Induced during mycorrhization	4 wpi only	C	VIII	NA	NA	GT8	NA	NA	NA	NA	NA	NA	NA	NA	Carbohydrate transport and metabolism	CAZyme	Glycosyltransferase	OG0004070	8.6286	8.68448	10.5857	5.50569	8.83421	8.088	55.4879	48.9292	58.8283	35.3701	30.4227	36.563	-0.22356	1	2.80189	0.000104164	2.21509	1
Lacdel1|2236995	Lacdel1	2236995	gene_19833	Induced during mycorrhization	6 wpi only	E	VIII	NA	NA	NA	NA	NA	NA	NA	NA	NA	PF00651	BTB	NA	Transcription factor	Holds a BTB domain	OG0000215	2.43813	3.41914	2.70949	0.795129	0.497302	0.960937	14.3442	12.5138	12.8184	19.0839	45.0705	27.6728	-1.78522	1	2.60477	0.881432	3.77359	1.14e-07
Lacdel1|2262359	Lacdel1	2262359	gene_7278	Induced during mycorrhization	4 and 6 wpi	C	VIII	NA	NA	NA	NA	NA	NA	NA	1.14.14.1	Unspecific monooxygenase.	PF00067	p450	Secondary metabolites biosynthesis, transport and catabolism	Cytochrome p450		OG0000123	2.75193	2.1938	2.76952	1.93299	1.53711	3.69273	121.529	161.145	106.627	63.8178	69.2845	52.6659	0.651583	1	6.73611	1.48e-53	5.5998	1.45e-30
Lacdel1|2269536	Lacdel1	2269536	gene_14501	Induced during mycorrhization	6 wpi only	C	VIII	NA	NA	NA	NA	NA	NA	NA	NA	NA	PF00172	Zn_clus	NA	Transcription factor	Holds a zinc finger domain	OG0001562	9.59395	10.4895	12.0024	13.3674	15.158	13.1821	76.8076	42.38	36.9907	71.3146	70.1042	40.9066	0.532482	1	2.78886	0.163513	2.95572	0.0345206
Lacdel1|2287701	Lacdel1	2287701	gene_4507	Induced during mycorrhization	4 and 6 wpi	B	VIII	NA	NA	NA	NA	NA	NA	NA	NA	NA	PF00248	Aldo_ket_red	Energy production and conversion	Other function	Aldo/keto reductase	OG0000243	4.51839	4.9487	5.61025	8.37796	18.7965	16.053	70.7833	89.7349	122.759	176.455	130.396	212.756	1.64182	1	4.70976	8.31e-18	5.58698	3.6e-31
Lacdel1|2293293	Lacdel1	2293293	gene_13324	Induced during mycorrhization	4 and 6 wpi	E	VIII	NA	NA	NA	NA	NA	NA	NA	3.6.-.-	Acting on acid anhydrides.	PF00069,PF07714,PF06293	Pkinase,Pkinase_Tyr,Kdo	NA	Other function	Tyrosine kinase	OG0010523	0.239571	0.207622	0	0.261721	0	0.156038	6.43886	5.67399	5.04598	4.32729	3.97457	4.7655	-0.198187	1	5.50314	3.23e-12	5.0893	2.56e-09
Lacdel1|2295343	Lacdel1	2295343	gene_10894	Induced during mycorrhization	4 wpi only	C	VIII	NA	NA	NA	NA	NA	NA	NA	NA	NA	PF00067	p450	Secondary metabolites biosynthesis, transport and catabolism	Cytochrome p450		OG0006583	2.22494	3.32496	2.78793	4.1181	4.68493	7.92062	21.6565	18.9628	16.6453	9.01386	7.8984	6.7944	1.18799	1	3.22419	9.18e-05	1.96726	1
Lacdel1|2295750	Lacdel1	2295750	gene_14319	Induced during mycorrhization	6 wpi only	E	VIII	NA	NA	NA	NA	NA	NA	NA	NA	NA	PF07690	MFS_1	General function prediction only	Transporter/Permease	Unknown transporter	OG0004065	1.33566	1.3854	1.66465	1.87882	1.59388	1.65253	5.27807	7.38917	5.91368	6.69525	11.613	10.1763	0.20682	1	2.46915	1	3.00778	0.00419056
Lacdel1|2297837	Lacdel1	2297837	gene_19808	Induced during mycorrhization	4 wpi only	E	VIII	NA	NA	NA	NA	NA	NA	NA	1.14.14.1	Unspecific monooxygenase.	PF00067	p450	Secondary metabolites biosynthesis, transport and catabolism	Cytochrome p450		OG0000123	0.142351	0.201328	0.256016	0	0.092181	0.381685	4.03411	2.44096	2.4097	1.21958	1.60309	0.818112	0.571679	1	4.81013	0.000931571	3.55335	0.556533
Lacdel1|2299420	Lacdel1	2299420	gene_15390	Induced during mycorrhization	4 and 6 wpi	C	VIII	NA	NA	NA	NA	NA	NA	NA	NA	NA	PF10250	O-FucT	NA	Other function	GDP-fucose protein O-fucosyltransferase	OG0003742	10.077	11.8218	10.4752	9.42061	8.71629	9.42838	59.1162	63.5219	72.0127	60.7163	36.9358	56.3185	-0.136834	1	3.06886	6.22e-07	2.69257	0.00852206
Lacdel1|2313789	Lacdel1	2313789	gene_6304	Induced during mycorrhization	4 and 6 wpi	C	VIII	NA	NA	NA	NA	NA	NA	NA	1.14.14.1	Unspecific monooxygenase.	PF00067	p450	Lipid transport and metabolism ; Secondary metabolites biosynthesis, transport and catabolism	Cytochrome p450		OG0000185	2.01341	2.06237	2.48814	1.03287	0.77036	0.946718	69.0062	36.2218	57.2482	74.7142	56.9705	97.526	-1.13875	1	5.02104	7.77e-21	5.47209	1.45e-27
Lacdel1|2315158	Lacdel1	2315158	gene_9258	Induced during mycorrhization	6 wpi only	J	VIII	NA	NA	NA	NA	NA	NA	NA	NA	NA	PF05368,PF13460	NmrA,NAD_binding_10	NA	Other function	Putative transcription factor	OG0002094	19.085	26.8019	18.1447	14.8045	16.322	15.1332	73.9898	56.7134	34.4321	111.375	144.19	105.342	-0.160506	1	1.91146	1	2.94705	0.0362228
Lacdel1|2341626	Lacdel1	2341626	gene_2322	Induced during mycorrhization	6 wpi only	J	VIII	NA	NA	NA	NA	NA	NA	NA	NA	NA	PF06201	PITH	Posttranslational modification, protein turnover, chaperones	Other function	Holds a PITH domain	OG0007225	30.3478	30.6223	29.4394	23.0334	24.5457	39.1003	106.946	105.7	99.4463	156.507	139.537	228.776	0.0538941	1	2.15626	1	2.89113	0.00129123
Lacdel1|2357141	Lacdel1	2357141	gene_5957	Induced during mycorrhization	4 wpi only	E	VIII	NA	NA	NA	NA	NA	NA	NA	NA	NA	PF00067	p450	Secondary metabolites biosynthesis, transport and catabolism	Cytochrome p450		OG0002860	0.946628	0.888857	0.641666	0.346655	1.01917	2.77556	11.5531	9.88798	8.02698	6.54076	5.8772	5.29193	0.835701	1	3.98368	2.94e-05	3.19637	0.0906571
Lacdel1|2359320	Lacdel1	2359320	gene_3865	Induced during mycorrhization	4 wpi only	C	VIII	NA	NA	NA	NA	NA	NA	NA	2.7.1.12	Gluconokinase.	PF01202,PF13671,PF13238	SKI,AAA_33,AAA_18	Carbohydrate transport and metabolism	Other function	Gluconokinase.	OG0006437	3.92347	3.80419	3.35896	2.49818	5.66194	5.46574	15.1882	19.9854	25.4534	13.8933	20.2019	20.5822	0.351612	1	2.9372	0.0388101	2.80152	0.177992
Lacdel1|2361129	Lacdel1	2361129	gene_4555	Induced during mycorrhization	4 wpi only	J	VIII	NA	NA	NA	NA	NA	NA	NA	NA	NA	NA	NA	RNA processing and modification ; Transcription	Unknown	Unknown	OG0006059	30.4971	29.9013	31.1248	27.7334	30.9646	30.9728	303.506	279.131	207.7	74.7553	79.9206	81.2935	0.115473	1	3.37197	6.21e-18	1.64862	1
Lacdel1|2376642	Lacdel1	2376642	gene_6624	Induced during mycorrhization	6 wpi only	J	VIII	NA	NA	NA	NA	NA	NA	NA	NA	NA	NA	NA	Function unknown	Unknown	Unknown	OG0008643	29.1352	29.814	26.8428	23.1898	25.8438	25.7054	496.653	136.517	351.391	295.836	139.955	932.054	-0.0409893	1	3.99213	0.0529304	4.43818	0.0056378
Lacdel1|2380953	Lacdel1	2380953	gene_9097	Induced during mycorrhization	6 wpi only	C	VIII	NA	NA	NA	NA	NA	NA	NA	NA	NA	PF02705	K_trans	NA	Transporter/Permease	Potassium transporter	OG0000491	3.69841	3.72867	4.15337	4.32784	3.76736	5.70658	14.1239	13.9735	24.774	33.3025	31.1147	55.7017	0.345119	1	2.56248	0.94455	3.71885	6.67e-08
Lacdel1|2433470	Lacdel1	2433470	gene_16829	Induced during mycorrhization	6 wpi only	C	VIII	NA	NA	NA	NA	NA	NA	NA	1.3.3.6	Acyl-CoA oxidase.	PF02770	Acyl-CoA_dh_M	Lipid transport and metabolism ; Secondary metabolites biosynthesis, transport and catabolism	Other function	Acyl-CoA oxidase.	OG0001828	19.0104	18.5154	17.771	18.2643	18.0554	16.7935	12.7194	9.40236	7.62036	161.14	108.135	73.1373	0.0423505	1	-0.508895	1	2.88406	0.0326641
Lacdel1|2441726	Lacdel1	2441726	gene_14024	Induced during mycorrhization	6 wpi only	C	VIII	NA	NA	NA	NA	NA	NA	NA	NA	NA	NA	NA	NA	Unknown	Unknown	OG0002064	4.93525	9.036	5.58849	9.57518	3.05885	7.31264	23.1252	21.8718	24.601	86.1138	125.169	114.14	0.115367	1	2.25299	1	4.45165	4.63e-12
Lacdel1|2469638	Lacdel1	2469638	gene_19303	Induced during mycorrhization	6 wpi only	C	VIII	NA	NA	NA	NA	NA	NA	NA	NA	NA	NA	NA	NA	Unknown	Unknown	OG0002064	4.84928	9.73264	7.95279	13.2664	4.12363	9.98575	25.9953	21.2646	23.4991	88.1504	107.613	101.818	0.330899	1	1.99358	1	4.01704	2.51e-09
Lacdel1|2479129	Lacdel1	2479129	gene_24999	Induced during mycorrhization	4 and 6 wpi	C	VIII	NA	NA	NA	NA	NA	NA	NA	NA	NA	PF04082	Fungal_trans	NA	Transcription factor	Fungal specific transcription factor domain	OG0001086	4.38173	3.45434	4.51265	2.21022	3.17087	2.86432	41.6376	48.0307	48.836	50.3793	36.2353	74.7816	-0.363795	1	3.88321	1.06e-12	4.05896	4.14e-15
Lacdel1|2508795	Lacdel1	2508795	gene_17155	Induced during mycorrhization	4 and 6 wpi	C	VIII	NA	NA	NA	NA	NA	NA	NA	NA	NA	PF07350	DUF1479	NA	Unknown	Unknown	OG0007566	4.89595	5.41237	3.77369	5.41783	4.82189	5.97107	44.0892	63.4198	68.6198	67.0331	62.9044	83.4865	0.311782	1	4.00775	2.59e-21	4.30412	3.77e-28
Lacdel1|2512092	Lacdel1	2512092	gene_1415	Induced during mycorrhization	4 wpi only	I	VIII	NA	NA	NA	NA	NA	NA	NA	NA	NA	NA	NA	NA	Unknown	Unknown	OG0004894	72.9361	73.2073	70.9709	88.6204	84.1013	91.3405	272.648	324.418	339.182	177.682	215.266	274.123	0.394072	1	2.53674	0.0151995	2.00938	1
Lacdel1|2512291	Lacdel1	2512291	gene_4	Induced during mycorrhization	4 wpi only	E	VIII	NA	NA	NA	NA	NA	NA	NA	1.14.14.1	Unspecific monooxygenase.	PF00067	p450	Secondary metabolites biosynthesis, transport and catabolism	Cytochrome p450		OG0000572	1.00915	0.519785	0.730166	0.586347	1.8934	1.27547	7.29927	5.80388	5.02159	1.55891	1.95825	3.28125	0.886155	1	3.544	0.00553594	2.15193	1
Lacdel1|2515868	Lacdel1	2515868	gene_4508	Induced during mycorrhization	4 and 6 wpi	C	VIII	NA	NA	NA	NA	NA	NA	NA	NA	NA	PF00248	Aldo_ket_red	Energy production and conversion	Other function	Aldo/keto reductase	OG0000243	0.906527	0.809283	0.615659	1.55406	5.53344	20.8594	131.726	227.818	127.326	123.821	46.3151	104.012	3.56668	1	8.02443	3.51e-11	7.16158	4.15e-08
Lacdel1|2519475	Lacdel1	2519475	gene_9113	Induced during mycorrhization	4 and 6 wpi	B	VIII	NA	NA	NA	NA	NA	NA	NA	1.14.14.1	Unspecific monooxygenase.	PF00067	p450	Secondary metabolites biosynthesis, transport and catabolism	Cytochrome p450		OG0005634	1.52824	1.32445	1.20699	8.59697	12.8312	11.3585	314.506	507.408	449.023	177.832	210.996	194.94	2.92186	0.6031	8.40375	1.45e-139	7.28604	2.1e-94
Lacdel1|2519482	Lacdel1	2519482	gene_9120	Induced during mycorrhization	4 wpi only	C	VIII	NA	NA	NA	NA	NA	NA	NA	NA	NA	PF00067	p450	Secondary metabolites biosynthesis, transport and catabolism	Cytochrome p450		OG0000461	5.06454	4.33342	5.2654	8.33568	6.97191	17.3638	60.9712	48.2114	49.4532	27.9649	26.1168	27.733	1.17795	1	3.66365	1.4e-08	2.67553	0.285053
Lacdel1|2523052	Lacdel1	2523052	gene_11157	Induced during mycorrhization	4 and 6 wpi	C	VIII	Secreted	NA	NA	NA	NA	NA	NA	NA	NA	PF00067	p450	Secondary metabolites biosynthesis, transport and catabolism	Cytochrome p450		OG0010365	8.13102	8.76012	10.2172	8.40569	7.0602	7.62178	64.0812	94.1301	84.8407	62.4717	47.0879	57.4933	-0.0488271	1	3.32253	2.92e-10	2.79565	0.00144387
Lacdel1|2571026	Lacdel1	2571026	gene_15210	Induced during mycorrhization	4 and 6 wpi	C	VIII	NA	NA	GH47	NA	NA	NA	NA	3.2.1.113	Mannosyl-oligosaccharide 1,2-alpha-mannosidase.	PF01532	Glyco_hydro_47	Carbohydrate transport and metabolism	CAZyme	Glycoside Hydrolase	OG0000735	2.62989	3.17109	3.10731	2.49076	2.72326	3.5956	92.1585	104.227	133.836	71.7052	34.4656	126.299	0.0487209	1	5.96562	2.21e-21	5.3329	5.69e-15
Lacdel1|2574522	Lacdel1	2574522	gene_4986	Induced during mycorrhization	4 and 6 wpi	C	VIII	Secreted	NA	NA	NA	NA	NA	NA	3.4.16.6	Carboxypeptidase D.	PF00450	Peptidase_S10	Amino acid transport and metabolism ; Posttranslational modification, protein turnover, chaperones	Protease	Carboxypeptidase (S10)	OG0000220	0.231425	0.1485	0.164209	0.504287	0.292322	0	31.8434	27.4968	33.953	53.1096	37.6424	47.9517	0.705951	1	7.78257	5.81e-24	8.31619	1.29e-28
Lacdel1|2577320	Lacdel1	2577320	gene_6278	Induced during mycorrhization	4 and 6 wpi	I	VIII	NA	NA	NA	NA	NA	NA	NA	1.14.14.1	Unspecific monooxygenase.	PF00067	p450	Lipid transport and metabolism ; Secondary metabolites biosynthesis, transport and catabolism	Cytochrome p450		OG0004512	39.7631	46.7173	40.0976	43.8967	48.8923	40.7098	424.195	453.546	506.696	803.386	620.28	664.293	0.156241	1	3.76229	3.89e-34	4.34292	2.24e-60
Lacdel1|2649548	Lacdel1	2649548	gene_25341	Induced during mycorrhization	4 and 6 wpi	C	VIII	Secreted	NA	NA	NA	NA	NA	NA	1.14.18.1	Monophenol monooxygenase.	PF00264	Tyrosinase	NA	Other function	Tyrosinase	OG0002206	1.87166	1.89412	1.23733	2.19516	3.09424	3.11353	34.9749	28.7847	42.6246	71.0548	55.4467	56.841	0.722544	1	4.83595	1.2e-22	5.639	1.29e-37
Lacdel1|2649933	Lacdel1	2649933	gene_11827	Induced during mycorrhization	4 wpi only	J	VIII	NA	NA	CBM21	NA	NA	NA	NA	NA	NA	PF03370,PF16760	CBM_21,CBM53	Posttranslational modification, protein turnover, chaperones ; Signal transduction mechanisms	CAZyme	Holds a CBM domain	OG0001238	26.9323	35.2923	34.6268	26.0664	28.5172	29.6435	146.352	234.96	206.425	59.9345	82.633	113.288	0.0949204	1	3.11119	3.27e-05	1.84777	1
Lacdel1|2658312	Lacdel1	2658312	gene_15539	Induced during mycorrhization	4 wpi only	C	VIII	NA	NA	NA	NA	NA	NA	NA	2.1.1.110	Sterigmatocystin 7-O-methyltransferase.	PF00891	Methyltransf_2	General function prediction only	Other function	Methyltransferase	OG0000151	3.6136	4.07703	4.37857	3.05411	3.43829	3.83138	35.754	83.2686	118.43	38.774	14.7975	101.131	-0.210801	1	4.32307	0.00879272	3.8235	0.126046
Lacdel1|2669849	Lacdel1	2669849	gene_2	Induced during mycorrhization	4 and 6 wpi	B	VIII	NA	NA	NA	NA	NA	NA	NA	1.14.14.1	Unspecific monooxygenase.	PF00067	p450	Secondary metabolites biosynthesis, transport and catabolism	Cytochrome p450		OG0000123	9.98331	10.7128	8.66862	4.17117	4.84478	8.76886	132.887	157.778	113.188	82.6542	90.5035	71.2102	-0.510934	1	4.16337	1.94e-19	3.42869	2.41e-08
Lacdel1|2675310	Lacdel1	2675310	gene_7579	Induced during mycorrhization	4 and 6 wpi	E	VIII	NA	NA	NA	NA	NA	NA	NA	NA	NA	PF00578,PF10417,PF08534	AhpC-TSA,1-cysPrx_C,Redoxin	Posttranslational modification, protein turnover, chaperones	Other function	Peroxiredoxins	OG0000732	0.337442	0.433334	1.0815	1.08984	2.35325	2.5368	11.6724	13.3746	19.3743	10.747	8.51704	12.815	1.94972	1	4.94929	2.9e-09	4.48091	2.17e-06
Lacdel1|2682116	Lacdel1	2682116	gene_19846	Induced during mycorrhization	4 wpi only	C	VIII	NA	NA	NA	NA	NA	NA	NA	NA	NA	NA	NA	NA	Unknown	Unknown	OG0009608	1.7639	1.73123	2.24296	1.9996	1.83308	2.54015	277.482	217.1	62.2114	17.6487	77.4835	7.47926	0.269408	1	6.99293	1.56e-07	4.53629	0.0803322
Lacdel1|309966	Lacdel1	309966	gene_6279	Induced during mycorrhization	4 and 6 wpi	B	VIII	NA	NA	NA	NA	NA	NA	NA	1.14.14.1	Unspecific monooxygenase.	PF00067	p450	Lipid transport and metabolism ; Secondary metabolites biosynthesis, transport and catabolism	Cytochrome p450		OG0000514	4.38112	5.23926	4.32996	6.36136	5.96318	6.97647	269.951	480.358	439.883	221.639	212.484	241.513	0.571304	1	6.75982	3.67e-122	5.94848	2.07e-83
Lacdel1|406413	Lacdel1	406413	gene_6838	Induced during mycorrhization	6 wpi only	C	VIII	NA	NA	NA	NA	NA	NA	NA	NA	NA	PF05368,PF13460,PF03435	NmrA,NAD_binding_10,Sacchrp_dh_NADP	NA	Other function	Putative transcription factor	OG0002753	14.6627	17.4187	18.1252	35.3058	34.868	56.423	30.6436	36.4288	45.2164	93.8789	161.279	106.664	1.5947	1	1.39849	1	3.41781	4.23e-06
Lacdel1|542962	Lacdel1	542962	gene_5	Induced during mycorrhization	4 wpi only	C	VIII	NA	NA	NA	NA	NA	NA	NA	1.14.14.1	Unspecific monooxygenase.	PF00067	p450	Secondary metabolites biosynthesis, transport and catabolism	Cytochrome p450		OG0000572	3.29077	3.71082	4.143	2.28089	2.17407	5.16253	37.5338	30.6019	33.4399	31.5242	19.6867	21.1331	-0.164734	1	3.33013	3.68e-05	2.82997	0.0692673
Lacdel1|705906	Lacdel1	705906	gene_9941	Induced during mycorrhization	4 and 6 wpi	C	VIII	NA	NA	NA	NA	NA	NA	NA	NA	NA	PF04082	Fungal_trans	NA	Transcription factor	Fungal specific transcription factor domain	OG0001086	3.82899	2.76713	4.26274	2.18181	2.37037	2.97316	40.5255	44.0025	44.8796	45.6049	34.6265	71.3211	-0.261788	1	3.98193	2.34e-12	4.14728	1.9e-14
Lacdel1|MSTRG.2199	Lacdel1	NA	MSTRG.2199	Induced during mycorrhization	6 wpi only	E	VIII	NA	NA	NA	NA	NA	NA	NA	NA	NA	PF00266	Aminotran_5	NA	Other function	Aminotransferase	OG0011836	0.789543	0.562483	0.826461	1.23095	0.684388	1.14353	2.70983	3.23967	2.8468	7.65506	7.40736	5.67343	0.735358	1	2.38094	1	3.61305	1.73e-07
Lacdel1|MSTRG.3027	Lacdel1	NA	MSTRG.3027	Induced during mycorrhization	4 and 6 wpi	E	VIII	NA	NA	NA	NA	NA	NA	NA	NA	NA	NA	NA	NA	Unknown	Unknown	OG0011892	0.09458	0.256013	0.207956	0.283078	0.248718	0.204247	4.17106	3.42702	2.2271	3.85714	4.31184	2.57035	0.706534	1	4.64633	7.47e-07	4.71239	3.71e-07
Lacdel1|MSTRG.3031	Lacdel1	NA	MSTRG.3031	Induced during mycorrhization	4 wpi only	E	VIII	NA	NA	NA	NA	NA	NA	NA	NA	NA	NA	NA	NA	Unknown	Unknown	OG0004294	1.16485	1.12945	0.921684	1.12009	1.73941	1.71232	7.82902	11.6302	13.2961	8.05077	3.02935	3.45484	0.529131	1	3.37592	0.00803693	2.21915	1
Lacdel1|MSTRG.5804	Lacdel1	NA	MSTRG.5804	Induced during mycorrhization	6 wpi only	J	VIII	NA	NA	NA	NA	NA	NA	NA	NA	NA	NA	NA	NA	Unknown	Unknown	OG0002471	21.2472	23.9699	20.3326	17.0782	17.1444	19.4017	70.5826	69.3013	85.6354	136.832	102.224	174.174	-0.130573	1	2.23332	1	3.0941	1.57e-07
Lacdel1|MSTRG.6062	Lacdel1	NA	MSTRG.6062	Induced during mycorrhization	6 wpi only	C	VIII	NA	NA	NA	NA	NA	NA	NA	NA	NA	NA	NA	NA	Unknown	Unknown	OG0016576	7.4805	10.4352	9.18536	9.53471	9.85494	9.4296	16.0898	10.4332	11.8361	52.6835	45.0289	40.3522	0.329845	1	1.4467	1	3.24069	4.05e-06
Lacdel1|MSTRG.8124	Lacdel1	NA	MSTRG.8124	Induced during mycorrhization	4 wpi only	J	VIII	NA	NA	NA	NA	NA	NA	NA	NA	NA	NA	NA	NA	Unknown	Unknown	OG0016650	15.3058	14.464	15.2761	15.4473	14.4375	13.781	314.593	299.486	267.2	103.308	98.1912	130.706	0.0835541	1	2.96483	2.26e-12	1.88017	1
Lacdel1|MSTRG.8568	Lacdel1	NA	MSTRG.8568	Induced during mycorrhization	4 and 6 wpi	C	VIII	NA	CAH17527|GGGX|abH03	NA	NA	NA	NA	NA	NA	NA	NA	NA	NA	Lipase	Putative triacylglycerol lipase.	OG0016680	0.868848	1.11204	1.97487	1.40591	2.89348	8.85709	52.4875	31.1606	24.8123	24.0782	27.8707	31.8811	1.83121	1	5.1992	5.38e-05	4.78838	0.00102822
Lacdel1|1088139	Lacdel1	1088139	gene_10187	Induced during mycorrhization	4 and 6 wpi	J	IX	Secreted	NA	GH3	NA	NA	NA	NA	3.2.1.21	Beta-glucosidase.	PF01915,PF00933,PF14310	Glyco_hydro_3_C,Glyco_hydro_3,Fn3-like	NA	CAZyme	Glycoside Hydrolase	OG0003442	18.4958	16.7191	25.9877	10.6984	11.4761	10.3475	350.786	224.481	212.46	166.497	105.005	155.622	-0.800198	1	4.0751	2.74e-13	3.1596	0.000474293
Lacdel1|1124596	Lacdel1	1124596	gene_13311	Induced during mycorrhization	4 wpi only	J	IX	NA	NA	AA3_3	PartialPCWdegradation	NA	NA	NA	1.1.3.13	Alcohol oxidase.	PF00732,PF05199	GMC_oxred_N,GMC_oxred_C	General function prediction only	CAZyme	Alcohol oxidase	OG0012012	13.2721	16.7157	13.7789	24.3795	25.961	33.5555	132.004	133.503	94.736	64.6558	49.5346	35.1885	1.04436	1	3.42127	7.02e-08	2.12209	1
Lacdel1|1253601	Lacdel1	1253601	gene_2347	Induced during mycorrhization	4 wpi only	J	IX	SSP	NA	NA	NA	NA	NA	NA	NA	NA	PF10342	GPI-anchored	NA	Other function	Holds a GPI-anchored domain	OG0008790	29.1573	35.4313	27.9844	15.731	59.2681	50.2103	269.186	223.975	159.644	109.305	107.376	168.939	0.639703	1	3.358	0.00809263	2.57844	1
Lacdel1|133343	Lacdel1	133343	gene_3852	Induced during mycorrhization	4 wpi only	J	IX	NA	NA	NA	NA	NA	NA	NA	NA	NA	NA	NA	NA	Unknown	Unknown	OG0014950	10.0035	18.0578	17.2511	7.84509	5.54681	10.327	626.529	618.032	141.501	181.453	345.692	78.6257	-0.741372	1	5.33143	1.99e-05	4.08908	0.0500569
Lacdel1|1388986	Lacdel1	1388986	gene_12154	Induced during mycorrhization	4 and 6 wpi	C	IX	NA	NA	GT15	NA	NA	NA	NA	2.4.1.-	Hexosyltransferases.	PF01793	Glyco_transf_15	Carbohydrate transport and metabolism	CAZyme	Glycosyltransferase	OG0000237	4.26224	2.96391	3.51289	3.38375	3.38662	4.76089	55.9322	68.9161	78.4938	33.9579	22.6228	61.7415	0.145646	1	4.57711	1.58e-14	3.77448	9.43e-07
Lacdel1|1599210	Lacdel1	1599210	gene_10893	Induced during mycorrhization	4 and 6 wpi	H	IX	NA	NA	NA	NA	NA	NA	NA	NA	NA	PF00230	MIP	Carbohydrate transport and metabolism	Transporter/Permease	MIP	OG0005432	6.71451	6.73916	7.49829	8.17159	34.4192	10.0706	8446.06	6851.46	6192.57	6976.59	4005.96	4132.37	1.44968	1	10.3641	2.47e-51	9.83392	8.57e-45
Lacdel1|173211	Lacdel1	173211	gene_14691	Induced during mycorrhization	6 wpi only	E	IX	NA	NA	NA	NA	NA	NA	NA	NA	NA	NA	NA	NA	Unknown	Unknown	OG0002423	3.86347	4.03907	3.08469	3.26581	4.25273	3.72339	5.74319	5.71967	5.86144	16.0565	16.6206	19.1523	0.123772	1	1.02491	1	2.59395	0.00794064
Lacdel1|1759560	Lacdel1	1759560	gene_11921	Induced during mycorrhization	4 and 6 wpi	C	IX	NA	NA	NA	NA	NA	NA	NA	NA	NA	PF07690	MFS_1	Carbohydrate transport and metabolism	Transporter/Permease	Unknown transporter	OG0005825	0.830639	0.402031	0.596212	0.562881	0.615764	0.301604	28.1574	34.3627	30.5056	22.652	20.4282	25.5643	-0.134427	1	6.04967	4.47e-48	5.59811	1.6e-37
Lacdel1|182205	Lacdel1	182205	gene_15209	Induced during mycorrhization	4 and 6 wpi	C	IX	NA	NA	GT15	NA	NA	NA	NA	2.4.1.-	Hexosyltransferases.	PF01793	Glyco_transf_15	Carbohydrate transport and metabolism	CAZyme	Glycosyltransferase	OG0000237	2.01932	2.77056	2.80408	1.54228	2.72601	2.66366	42.5789	46.3732	66.2819	31.0133	19.0335	49.724	-0.0338696	1	4.90255	1.07e-14	4.24626	1.16e-08
Lacdel1|1860759	Lacdel1	1860759	gene_13605	Induced during mycorrhization	4 and 6 wpi	C	IX	NA	NA	NA	NA	NA	NA	NA	NA	NA	PF06441,PF00561	EHN,Abhydrolase_1	General function prediction only	Other function	Abhydrolase	OG0000015	2.70689	2.97794	2.48599	2.53262	2.89374	3.20026	30.1234	29.5808	25.535	17.9564	21.474	15.0843	0.209169	1	3.73345	1.58e-16	3.08617	3.03e-06
Lacdel1|1866339	Lacdel1	1866339	gene_4230	Induced during mycorrhization	4 wpi only	C	IX	NA	NA	NA	NA	NA	NA	NA	NA	NA	PF09349	OHCU_decarbox	NA	Other function	OHCU decarboxylase	OG0004221	6.88982	6.98328	7.59732	9.90511	10.8795	15.226	75.8517	46.8171	38.1566	21.5587	22.4336	11.8358	0.847957	1	3.29023	0.00124232	1.73901	1
Lacdel1|1873410	Lacdel1	1873410	gene_4314	Induced during mycorrhization	6 wpi only	C	IX	NA	NA	NA	NA	NA	NA	NA	NA	NA	PF00096,PF13465,PF13894,PF12171,PF16159,PF15909	zf-C2H2,zf-H2C2_2,zf-C2H2_4,zf-C2H2_jaz,FOXP-CC,zf-C2H2_8	General function prediction only	Transcription factor	Protease Inhibitor family I2	OG0004224	17.1161	18.3704	15.8981	21.2662	28.555	17.793	35.5972	35.482	42.8086	96.2318	114.674	114.044	0.731163	1	1.74126	1	3.14978	3.08e-09
Lacdel1|1882531	Lacdel1	1882531	gene_4442	Induced during mycorrhization	4 and 6 wpi	C	IX	NA	NA	NA	NA	NA	NA	NA	3.5.1.4	Amidase.	PF01425	Amidase	Lipid transport and metabolism ; Signal transduction mechanisms ; Translation, ribosomal structure and biogenesis	Other function	Amidase	OG0007845	14.3148	15.8878	12.9334	17.4872	21.0075	18.7724	60.3858	72.6809	61.4726	53.52	79.8594	63.7278	0.0827834	1	3.52788	2.17e-12	3.59891	1.64e-13
Lacdel1|218154	Lacdel1	218154	gene_4814	Induced during mycorrhization	4 and 6 wpi	J	IX	SSP	NA	GH45	Cellulose	NA	NA	NA	NA	NA	NA	NA	NA	CAZyme	Glycoside Hydrolase	OG0009657	16.6193	25.3272	17.8666	11.5038	29.3841	19.7289	1325.35	948.264	1017.51	484.697	361.297	303.474	0.104564	1	6.14462	4.85e-47	4.61212	1.81e-18
Lacdel1|2215590	Lacdel1	2215590	gene_3020	Induced during mycorrhization	4 and 6 wpi	F	IX	NA	NA	NA	NA	NA	NA	NA	NA	NA	PF12585	DUF3759	NA	Unknown	Unknown	OG0012172	1102.31	822.692	1032.84	1424.58	1337.9	1796.66	15161	15104.6	12261.5	9702.91	9607.71	8542.64	0.756037	1	4.28116	2.86e-40	3.63555	1.63e-20
Lacdel1|2228090	Lacdel1	2228090	gene_14447	Induced during mycorrhization	4 wpi only	J	IX	NA	NA	NA	NA	NA	NA	NA	NA	NA	NA	NA	NA	Unknown	Unknown	OG0003650	16.0811	17.7601	17.5206	17.0197	14.9777	17.8057	186.632	196.699	182.362	37.946	92.0545	48.9645	-0.0873787	1	3.76867	1.16e-07	2.19716	1
Lacdel1|2230540	Lacdel1	2230540	gene_15618	Induced during mycorrhization	4 and 6 wpi	C	IX	Secreted	NA	GH92	Mannan	NA	NA	NA	NA	NA	PF07971	Glyco_hydro_92	NA	CAZyme	Glycoside Hydrolase	OG0001043	1.42309	1.54351	1.70179	1.70088	2.02278	1.74207	61.3167	53.1345	58.3032	35.0491	23.8814	43.5008	0.431778	1	5.65069	3.88e-46	4.86991	3.67e-28
Lacdel1|2230891	Lacdel1	2230891	gene_15528	Induced during mycorrhization	4 and 6 wpi	C	IX	Secreted	NA	GH92	Mannan	NA	NA	NA	NA	NA	PF07971	Glyco_hydro_92	NA	CAZyme	Glycoside Hydrolase	OG0001043	2.07451	3.13903	2.57518	2.27704	2.13906	2.17999	48.1437	45.2054	53.5243	24.5851	19.4905	28.9306	-0.139217	1	4.59685	9.04e-37	3.56797	5e-13
Lacdel1|2231690	Lacdel1	2231690	gene_16824	Induced during mycorrhization	4 wpi only	J	IX	NA	NA	NA	NA	NA	NA	NA	NA	NA	NA	NA	NA	Unknown	Unknown	OG0003650	16.4543	15.9681	13.9173	17.7738	15.097	18.8635	202.705	207.014	195.639	38.1909	92.2109	50.3065	0.411088	1	4.33732	2.47e-13	2.5562	1
Lacdel1|2232196	Lacdel1	2232196	gene_15164	Induced during mycorrhization	4 wpi only	C	IX	NA	NA	NA	NA	NA	NA	NA	NA	NA	PF06441,PF00561	EHN,Abhydrolase_1	General function prediction only	Other function	Abhydrolase	OG0000015	3.69126	3.14429	2.97823	1.79142	3.09727	4.17461	29.0688	30.4717	25.7449	18.2066	16.0442	17.0301	-0.0513639	1	3.44285	5.51e-09	2.65096	0.119016
Lacdel1|2289866	Lacdel1	2289866	gene_6362	Induced during mycorrhization	4 wpi only	C	IX	NA	NA	NA	NA	NA	NA	NA	NA	NA	PF07690,PF06609,PF00083	MFS_1,TRI12,Sugar_tr	General function prediction only	Transporter/Permease	Sugar transporter	OG0001741	6.11219	5.4563	5.70196	3.33487	3.12089	4.68123	40.4041	50.9185	30.1265	19.8463	23.9028	17.7418	-0.494251	1	3.22037	3.36e-06	2.23978	1
Lacdel1|2295451	Lacdel1	2295451	gene_14440	Induced during mycorrhization	4 wpi only	J	IX	NA	NA	NA	NA	NA	NA	NA	NA	NA	NA	NA	NA	Unknown	Unknown	OG0002012	18.4655	21.3812	25.2873	17.4211	22.4079	30.3433	87.1514	151.188	158.27	63.974	60.4684	101.312	0.22461	1	2.99468	0.00544426	2.1601	1
Lacdel1|2310507	Lacdel1	2310507	gene_2817	Induced during mycorrhization	4 wpi only	J	IX	NA	NA	EXPN	NA	NA	NA	NA	NA	NA	PF03330	DPBB_1	NA	CAZyme	Distantly related to plant expansins	OG0007848	14.5971	16.6271	19.4758	15.358	35.2325	42.5213	396.319	408.547	257.171	159.971	72.0484	95.5144	0.985018	1	4.79305	2.7e-13	3.05155	0.094365
Lacdel1|2312923	Lacdel1	2312923	gene_6175	Induced during mycorrhization	4 wpi only	E	IX	NA	NA	GT2	NA	NA	NA	NA	NA	NA	PF01644	Chitin_synth_1	Cell wall/membrane/envelope biogenesis	CAZyme	Glycosyltransferase	OG0012271	1.261	1.15552	1.02771	1.6704	0.936382	0.983592	7.52437	6.15729	6.80492	4.8988	6.03369	4.86803	0.113768	1	2.92676	0.045558	2.56769	1
Lacdel1|2315827	Lacdel1	2315827	gene_9690	Induced during mycorrhization	4 wpi only	E	IX	SSP	NA	GH45	Cellulose	NA	NA	NA	NA	NA	NA	NA	NA	CAZyme	Glycoside Hydrolase	OG0004018	2.04072	2.99733	1.74785	1.45522	2.08334	3.04868	17.8745	12.1084	20.9377	12.9597	15.1315	10.6189	0.127702	1	3.1534	0.00939465	2.78437	0.381795
Lacdel1|2332996	Lacdel1	2332996	gene_63	Induced during mycorrhization	6 wpi only	I	IX	NA	NA	NA	NA	NA	NA	NA	NA	NA	PF03446,PF14833,PF01488	NAD_binding_2,NAD_binding_11,Shikimate_DH	General function prediction only	Other function	Shikimate / quinate dehydrogenase	OG0001006	68.302	67.853	76.2865	86.2054	79.3839	100.362	317.326	251.493	292.852	380.759	274.272	325.099	0.467973	1	2.43122	0.265282	2.58548	0.0208972
Lacdel1|2333297	Lacdel1	2333297	gene_114	Induced during mycorrhization	4 wpi only	J	IX	NA	NA	NA	NA	NA	NA	NA	NA	NA	PF07690,PF00083	MFS_1,Sugar_tr	General function prediction only	Transporter/Permease	Sugar transporter	OG0005472	35.7826	36.693	37.2248	31.5652	30.9158	34.1117	152.605	209.665	166.766	104.335	83.4266	68.9353	-0.0616378	1	2.67352	0.0013917	1.60583	1
Lacdel1|2336348	Lacdel1	2336348	gene_679	Induced during mycorrhization	4 wpi only	J	IX	NA	NA	NA	NA	NA	NA	NA	NA	NA	PF01597	GCV_H	Amino acid transport and metabolism	Other function	Glycine cleavage H-protein	OG0006869	34.062	38.4953	37.495	34.9519	36.3774	48.7085	126.524	193.896	203.981	77.7526	101.9	121.926	0.245169	1	2.70746	0.0400441	1.86341	1
Lacdel1|2354350	Lacdel1	2354350	gene_4446	Induced during mycorrhization	4 wpi only	J	IX	Secreted	NA	GH5_15	Glucan	NA	NA	NA	3.2.1.58	Glucan 1,3-beta-glucosidase.	PF00150	Cellulase	NA	CAZyme	Glycoside Hydrolase	OG0002241	37.525	41.8555	38.8675	27.2639	27.3083	35.5246	382.299	303.579	306.527	250.199	116.836	201.403	-0.265289	1	3.45612	1.26e-07	2.63773	0.242492
Lacdel1|2355807	Lacdel1	2355807	gene_5737	Induced during mycorrhization	4 wpi only	E	IX	Secreted	NA	GH47	NA	NA	NA	NA	3.2.1.113	Mannosyl-oligosaccharide 1,2-alpha-mannosidase.	PF01532	Glyco_hydro_47	Carbohydrate transport and metabolism	CAZyme	Glycoside Hydrolase	OG0000528	0.457295	0.76846	1.17216	1.41786	1.52764	2.98418	17.1712	9.2827	11.242	6.12655	2.58445	3.27137	1.67238	1	4.69502	1.44e-06	3.00276	0.9474
Lacdel1|2366412	Lacdel1	2366412	gene_6322	Induced during mycorrhization	4 wpi only	J	IX	NA	NA	NA	NA	NA	NA	NA	1.14.14.1	Unspecific monooxygenase.	PF00067	p450	Lipid transport and metabolism ; Secondary metabolites biosynthesis, transport and catabolism	Cytochrome p450		OG0001229	24.0703	15.4912	21.162	77.0998	77.119	82.9122	204.11	136.909	98.3408	169.978	84.5851	72.0054	2.10463	1	3.2678	0.00446307	2.82771	0.334547
Lacdel1|2376720	Lacdel1	2376720	gene_6640	Induced during mycorrhization	4 and 6 wpi	J	IX	NA	NA	GH3	NA	NA	NA	NA	3.2.1.21	Beta-glucosidase.	PF01915,PF00933,PF14310	Glyco_hydro_3_C,Glyco_hydro_3,Fn3-like	NA	CAZyme	Glycoside Hydrolase	OG0002732	15.4098	13.4831	13.8906	10.5416	11.0818	11.6893	200.119	205.667	208.438	114.081	62.8023	108.762	-0.25708	1	4.21454	1.1e-22	3.1004	1.76e-05
Lacdel1|2388533	Lacdel1	2388533	gene_9714	Induced during mycorrhization	4 and 6 wpi	J	IX	Secreted	NA	CE4	Hemicellulose	NA	NA	NA	3.5.1.41	Chitin deacetylase.	PF01522	Polysacc_deac_1	NA	CAZyme	Carbohydrate Esterase	OG0001052	14.9441	18.801	18.0336	17.2554	17.5334	24.4907	148.417	168.261	237.238	98.4424	59.7023	191.533	0.341678	1	3.78239	3.2e-06	3.09585	0.0309943
Lacdel1|2395182	Lacdel1	2395182	gene_8527	Induced during mycorrhization	4 and 6 wpi	B	IX	NA	NA	NA	NA	NA	NA	NA	NA	NA	NA	NA	NA	Unknown	Unknown	OG0008917	5.95539	5.94433	4.67683	8.14626	8.88837	7.82188	392.846	307.048	334.214	222.918	136.613	188.042	0.876449	1	6.74016	5.44e-95	5.79162	2.24e-60
Lacdel1|2396696	Lacdel1	2396696	gene_10615	Induced during mycorrhization	4 and 6 wpi	C	IX	NA	NA	NA	NA	NA	NA	NA	NA	NA	PF02535	Zip	Inorganic ion transport and metabolism	Other function	Holds a Zip domain	OG0001017	10.3159	9.42428	8.10554	11.2696	19.2605	11.4556	53.8115	58.9125	76.7005	88.5711	129.693	108.647	0.68454	1	3.04952	7.88e-05	3.84171	5.18e-15
Lacdel1|2396699	Lacdel1	2396699	gene_10616	Induced during mycorrhization	4 and 6 wpi	C	IX	NA	NA	NA	NA	NA	NA	NA	4.3.1.12	Ornithine cyclodeaminase.	PF02423	OCD_Mu_crystall	Amino acid transport and metabolism	Other function	Ornithine cyclodeaminase.	OG0000181	3.84719	3.54394	4.55291	7.03857	10.7237	6.42395	24.1947	26.9718	31.4506	35.0868	41.5947	34.5233	1.1939	1	3.26581	3.63e-07	3.67397	1.05e-12
Lacdel1|2396746	Lacdel1	2396746	gene_10620	Induced during mycorrhization	4 wpi only	C	IX	NA	NA	NA	NA	NA	NA	NA	4.3.1.12	Ornithine cyclodeaminase.	PF02423	OCD_Mu_crystall	Amino acid transport and metabolism	Other function	Ornithine cyclodeaminase.	OG0000181	10.879	12.7119	11.377	11.4833	10.5757	11.226	64.834	59.1936	43.3042	17.3479	17.3563	19.6014	0.108856	1	2.65969	0.0100584	1.03893	1
Lacdel1|2396922	Lacdel1	2396922	gene_9515	Induced during mycorrhization	6 wpi only	C	IX	NA	NA	NA	NA	NA	NA	NA	NA	NA	PF00071,PF08477,PF00025	Ras,Roc,Arf	Intracellular trafficking, secretion, and vesicular transport ; Signal transduction mechanisms	Other function	small GTP-binding protein	OG0002556	9.42462	18.9548	13.2634	17.3169	6.97163	8.81636	11.4233	8.30878	11.8557	71.9901	158.078	232.118	-0.186908	1	0.0589712	1	3.8776	8.08e-05
Lacdel1|2406652	Lacdel1	2406652	gene_10750	Induced during mycorrhization	4 wpi only	C	IX	Secreted	NA	NA	NA	NA	NA	NA	NA	NA	PF01593,PF13450	Amino_oxidase,NAD_binding_8	Secondary metabolites biosynthesis, transport and catabolism	Other function	Holds a Amino_oxidase domain	OG0000191	4.60588	5.12195	6.04516	5.21589	5.60146	5.02332	70.6096	33.064	37.9572	19.8112	21.6741	14.5675	0.195352	1	3.6508	1.21e-06	2.30103	1
Lacdel1|2425018	Lacdel1	2425018	gene_14492	Induced during mycorrhization	6 wpi only	F	IX	NA	NA	NA	NA	NA	NA	NA	5.2.1.8	Peptidylprolyl isomerase.	PF00076,PF16367	RRM_1,RRM_7	General function prediction only	Protease	Peptidase type C64	OG0006615	776.337	729.216	864.209	648.601	625.337	898.694	1404.57	1122.99	1213.13	4405.67	3821.62	3770.59	0.0252028	1	0.929893	1	2.5561	0.0361866
Lacdel1|2437147	Lacdel1	2437147	gene_15771	Induced during mycorrhization	4 and 6 wpi	C	IX	NA	NA	NA	NA	NA	NA	NA	NA	NA	PF02535	Zip	Inorganic ion transport and metabolism	Other function	Holds a Zip domain	OG0001017	7.26732	7.29866	6.76387	9.40736	15.6828	8.60451	40.8727	50.0416	69.1163	84.63	105.754	97.0137	0.702206	1	3.1818	4.11e-05	4.10078	2.45e-16
Lacdel1|2457130	Lacdel1	2457130	gene_16058	Induced during mycorrhization	4 and 6 wpi	J	IX	NA	NA	NA	NA	NA	NA	NA	NA	NA	PF00651	BTB	NA	Transcription factor	Holds a BTB domain	OG0002565	11.619	12.0556	14.9109	8.33995	9.70609	8.64957	596.426	438.422	110.421	257.246	432.874	84.2519	-0.363749	1	5.30447	2.6e-05	4.70252	0.00179379
Lacdel1|2462864	Lacdel1	2462864	gene_20280	Induced during mycorrhization	4 and 6 wpi	J	IX	NA	NA	NA	NA	NA	NA	NA	NA	NA	PF02535	Zip	Inorganic ion transport and metabolism	Other function	Holds a Zip domain	OG0001617	5.18773	6.31063	7.32142	36.6138	69.3937	35.1802	154.372	143.165	132.415	434.502	453.508	332.706	3.04875	0.506035	4.93706	4.24e-22	6.40979	3.2e-50
Lacdel1|2502485	Lacdel1	2502485	gene_1044	Induced during mycorrhization	4 and 6 wpi	J	IX	NA	NA	NA	NA	NA	NA	NA	NA	NA	NA	NA	NA	Unknown	Unknown	OG0005531	30.2073	38.087	31.1874	30.914	44.0575	35.3751	311.557	216.853	195.254	214.726	283.699	221.075	0.293591	1	3.20231	1.31e-06	3.16714	3.74e-06
Lacdel1|2505598	Lacdel1	2505598	gene_5012	Induced during mycorrhization	4 and 6 wpi	I	IX	NA	NA	NA	NA	NA	NA	NA	3.1.3.21	Glycerol-1-phosphatase.	PF13419,PF00702,PF13242	HAD_2,Hydrolase,Hydrolase_like	General function prediction only	Other function	Glycerol-1-phosphatase.	OG0001895	25.3427	30.6031	37.2526	34.3682	49.1839	48.3839	1196.05	1325.32	1573.18	365.813	556.595	899.836	0.622243	1	5.86733	1.63e-44	4.68601	2.99e-21
Lacdel1|2505803	Lacdel1	2505803	gene_6441	Induced during mycorrhization	4 wpi only	E	IX	NA	NA	NA	NA	NA	NA	NA	4.2.1.1	Carbonate dehydratase.	PF00484	Pro_CA	Inorganic ion transport and metabolism	Other function	Carbonate dehydratase.	OG0007378	1.59075	1.65588	1.26762	2.12717	3.48999	2.70324	34.6812	20.7312	8.16038	11.6018	17.7568	5.61938	0.905309	1	4.1703	0.000883113	3.2399	0.42564
Lacdel1|2507715	Lacdel1	2507715	gene_11920	Induced during mycorrhization	4 and 6 wpi	B	IX	NA	NA	NA	NA	NA	NA	NA	NA	NA	PF07690	MFS_1	Carbohydrate transport and metabolism	Transporter/Permease	Unknown transporter	OG0002873	10.1178	8.68457	9.99648	7.97753	7.25226	7.34354	195.736	210.864	191.917	157.465	117.568	200.912	-0.197534	1	4.71038	5.81e-46	4.35789	1.86e-34
Lacdel1|2509032	Lacdel1	2509032	gene_17922	Induced during mycorrhization	6 wpi only	C	IX	NA	NA	NA	NA	NA	NA	NA	3.4.23.1	Pepsin A.	PF00026,PF14543	Asp,TAXi_N	Posttranslational modification, protein turnover, chaperones	Protease	Pepsin (A1)	OG0003683	15.8994	13.8768	14.6152	26.926	22.7876	22.0256	32.35	27.7208	30.8612	82.0416	145.896	80.2349	0.95493	1	1.73268	1	3.30015	8.02e-06
Lacdel1|2509641	Lacdel1	2509641	gene_19286	Induced during mycorrhization	6 wpi only	E	IX	NA	NA	NA	NA	NA	NA	NA	NA	NA	PF07690	MFS_1	Carbohydrate transport and metabolism	Transporter/Permease	Unknown transporter	OG0004072	4.1029	2.70983	3.42436	4.16941	3.74951	4.1328	8.7916	6.93279	6.95969	27.2567	41.0273	33.6487	0.401441	1	1.43832	1	3.65765	1.14e-10
Lacdel1|2512421	Lacdel1	2512421	gene_153	Induced during mycorrhization	6 wpi only	I	IX	NA	NA	NA	NA	NA	NA	NA	6.2.1.12	4-coumarate--CoA ligase.	PF00501,PF13193	AMP-binding,AMP-binding_C	Lipid transport and metabolism	Other function	Ligase	OG0005467	90.2912	95.4725	101.924	81.6204	77.6203	81.6039	76.0942	80.35	74.4571	598.258	810.533	857.447	-0.120408	1	0.0975728	1	3.34629	2.96e-22
Lacdel1|2514346	Lacdel1	2514346	gene_3431	Induced during mycorrhization	6 wpi only	C	IX	NA	NA	NA	NA	NA	NA	NA	NA	NA	NA	NA	NA	Unknown	Unknown	OG0015900	4.83857	5.82545	4.74728	3.90938	4.37866	4.90854	41.0264	30.6008	37.9591	112.152	28.1546	40.8499	-0.0890416	1	3.16386	0.0625845	3.86182	5.22e-05
Lacdel1|2515934	Lacdel1	2515934	gene_5643	Induced during mycorrhization	4 and 6 wpi	C	IX	NA	NA	NA	NA	NA	NA	NA	NA	NA	PF02133	Transp_cyt_pur	Coenzyme transport and metabolism ; Nucleotide transport and metabolism	Transporter/Permease	Nucleobases transporter	OG0004636	1.46514	1.91352	1.98127	1.47258	2.36172	2.13988	20.7929	22.7348	19.6497	17.2345	18.7296	28.6047	0.224169	1	3.85789	7.81e-13	3.86326	7.44e-13
Lacdel1|2516306	Lacdel1	2516306	gene_5966	Induced during mycorrhization	4 and 6 wpi	C	IX	Secreted	CAH17527|GGGX|abH03	NA	NA	NA	NA	NA	3.1.1.3	Triacylglycerol lipase.	PF00135	COesterase	Signal transduction mechanisms	Lipase	Triacylglycerol lipase.	OG0001427	2.23686	2.11854	1.68844	1.35176	1.70807	2.09653	117.098	175.591	133.859	57.4563	53.929	69.7524	-0.123043	1	6.38484	9.46e-90	5.15011	2.11e-45
Lacdel1|2516322	Lacdel1	2516322	gene_5981	Induced during mycorrhization	4 and 6 wpi	B	IX	Secreted	CAH17527|GGGX|abH03	NA	NA	NA	NA	NA	3.1.1.3	Triacylglycerol lipase.	PF00135	COesterase	Signal transduction mechanisms	Lipase	Triacylglycerol lipase.	OG0004751	7.55895	9.12357	8.12806	6.58052	6.34409	7.2632	165.038	122.435	114.556	70.5181	50.6465	82.4942	-0.153884	1	4.40255	9.71e-26	3.412	9.9e-09
Lacdel1|2516690	Lacdel1	2516690	gene_3981	Induced during mycorrhization	4 and 6 wpi	B	IX	NA	NA	NA	NA	NA	NA	NA	1.1.1.100	3-oxoacyl-[acyl-carrier protein] reductase.	PF13561,PF00106,PF08659	adh_short_C2,adh_short,KR	General function prediction only	Other function	PKS related	OG0002560	4.64225	5.51846	3.33135	4.1186	3.92302	5.66222	311.154	158.639	127.919	131.802	97.7533	66.4667	0.103328	1	5.77947	2.81e-23	4.70486	8.31e-12
Lacdel1|2520122	Lacdel1	2520122	gene_7676	Induced during mycorrhization	4 and 6 wpi	C	IX	NA	NA	NA	NA	NA	NA	NA	1.6.99.1	NADPH dehydrogenase.	PF00724	Oxidored_FMN	Energy production and conversion ; General function prediction only	Other function	NADPH dehydrogenase.	OG0004766	8.69505	10.3244	6.68922	14.4292	20.2223	21.2117	53.1722	56.1045	66.9632	77.6914	103.521	103.132	1.21694	1	3.17647	7.13e-09	3.83852	6.37e-22
Lacdel1|2522525	Lacdel1	2522525	gene_13494	Induced during mycorrhization	4 and 6 wpi	J	IX	Secreted	NA	NA	NA	NA	NA	NA	NA	NA	PF00190,PF07883,PF02311,PF05899,PF01050	Cupin_1,Cupin_2,AraC_binding,Cupin_3,MannoseP_isomer	NA	Other function	Cupin	OG0003389	12.9537	7.26502	8.74717	12.1681	14.6516	8.90489	434.601	1182.76	641.111	102.965	121.92	74.9035	0.421261	1	6.65747	3.27e-44	3.7371	5.34e-06
Lacdel1|2524137	Lacdel1	2524137	gene_11754	Induced during mycorrhization	4 and 6 wpi	J	IX	NA	NA	NA	NA	NA	NA	NA	1.3.1.33	Protochlorophyllide reductase.	PF00106,PF13561,PF08659,PF01370,PF16363	adh_short,adh_short_C2,KR,Epimerase,GDP_Man_Dehyd	Secondary metabolites biosynthesis, transport and catabolism	Other function	Protochlorophyllide reductase.	OG0000400	20.6919	13.6494	18.7094	15.9804	14.5522	28.162	273.806	413.789	409.135	182.658	179.642	214.23	0.241933	1	4.73798	1.92e-29	3.78904	1.95e-12
Lacdel1|2525570	Lacdel1	2525570	gene_13963	Induced during mycorrhization	4 wpi only	C	IX	NA	NA	NA	NA	NA	NA	NA	NA	NA	PF03641	Lysine_decarbox	NA	Other function	Lysine decarboxylase	OG0000780	5.12652	3.89176	2.53878	6.25866	4.7973	9.99834	71.4183	88.481	62.158	13.5045	16.3607	14.0902	0.877405	1	4.58084	4.94e-16	2.23948	1
Lacdel1|2526428	Lacdel1	2526428	gene_14404	Induced during mycorrhization	6 wpi only	E	IX	Secreted	NA	NA	NA	NA	NA	NA	3.4.23.5	Cathepsin D.	PF00026,PF14543	Asp,TAXi_N	Posttranslational modification, protein turnover, chaperones	Protease	Pepsin (A1)	OG0012725	4.12129	3.5521	3.87613	2.72912	1.54078	1.77505	9.35374	10.7234	10.5638	27.7233	18.6102	24.2753	-0.929686	1	2.08767	1	3.27292	2.31e-05
Lacdel1|253852	Lacdel1	253852	gene_5063	Induced during mycorrhization	4 and 6 wpi	B	IX	NA	NA	NA	NA	NA	NA	NA	NA	NA	PF11700,PF07690	ATG22,MFS_1	NA	Transporter/Permease	Amino acid or protein transporter	OG0001608	4.80727	5.60986	4.13403	3.97242	5.04394	5.7114	178.263	322.36	385.27	197.874	197.986	381.412	0.114698	1	6.17852	8.16e-43	5.98557	1.15e-38
Lacdel1|2542321	Lacdel1	2542321	gene_9129	Induced during mycorrhization	4 wpi only	C	IX	NA	NA	NA	NA	NA	NA	NA	NA	NA	PF06441,PF00561	EHN,Abhydrolase_1	General function prediction only	Other function	Abhydrolase	OG0000134	7.50314	8.10578	7.28686	5.02904	7.74828	14.1554	53.3507	46.5244	40.9637	39.5906	27.6069	22.4919	0.352492	1	3.03117	0.0201198	2.37567	1
Lacdel1|2543688	Lacdel1	2543688	gene_13959	Induced during mycorrhization	4 and 6 wpi	E	IX	NA	NA	NA	NA	NA	NA	NA	NA	NA	PF03641	Lysine_decarbox	NA	Other function	Lysine decarboxylase	OG0000780	0.126555	0.252453	0.394109	0.042492	0.16679	0.813726	5.48252	8.07655	5.3167	5.8092	2.24465	2.7711	-0.0436627	1	4.91355	0.000145418	4.20624	0.0182754
Lacdel1|2549849	Lacdel1	2549849	gene_5965	Induced during mycorrhization	4 and 6 wpi	E	IX	NA	CAH17527|GGGX|abH03	NA	NA	NA	NA	NA	3.1.1.3	Triacylglycerol lipase.	PF00135	COesterase	Signal transduction mechanisms	Lipase	Triacylglycerol lipase.	OG0009364	0.85713	1.0947	0.893566	1.50152	0.905453	1.01467	7.38502	5.68884	10.2545	10.9619	10.6251	7.57162	0.48974	1	3.52725	4.44e-05	3.83828	2.12e-07
Lacdel1|2551756	Lacdel1	2551756	gene_9119	Induced during mycorrhization	4 wpi only	C	IX	NA	NA	NA	NA	NA	NA	NA	NA	NA	PF12697,PF00561,PF12146	Abhydrolase_6,Abhydrolase_1,Hydrolase_4	Lipid transport and metabolism	Other function	Abhydrolase	OG0000345	3.21726	1.67447	3.08843	2.24296	2.68549	6.90534	20.6397	18.5338	21.4722	7.23214	8.75141	8.96802	0.761186	1	3.33978	0.000451792	2.07951	1
Lacdel1|2552404	Lacdel1	2552404	gene_9373	Induced during mycorrhization	6 wpi only	I	IX	NA	NA	NA	NA	NA	NA	NA	3.1.1.45	Carboxymethylenebutenolidase.	PF01738	DLH	General function prediction only	Other function	Carboxymethylenebutenolidase.	OG0003119	125.796	141.591	157.135	108.158	78.4707	99.4901	204.187	172.869	216.503	853.036	1114.17	943.786	-0.448409	1	0.873136	1	3.14591	2.5e-09
Lacdel1|2556166	Lacdel1	2556166	gene_15177	Induced during mycorrhization	4 wpi only	C	IX	NA	NA	NA	NA	NA	NA	NA	NA	NA	PF06441,PF00561	EHN,Abhydrolase_1	General function prediction only	Other function	Abhydrolase	OG0000015	13.682	15.6646	11.8737	14.0619	19.6771	19.4889	95.8199	115.266	127.264	67.7282	42.8316	73.3389	0.481462	1	3.38058	1.32e-09	2.48868	0.455062
Lacdel1|2604789	Lacdel1	2604789	gene_8867	Induced during mycorrhization	4 and 6 wpi	C	IX	Secreted	CAH17527|GGGX|abH03	NA	NA	NA	NA	NA	3.1.1.3	Triacylglycerol lipase.	PF00135	COesterase	Signal transduction mechanisms	Lipase	Triacylglycerol lipase.	OG0002174	5.58862	6.88083	5.16913	5.44066	4.68555	5.01921	61.658	70.1994	48.4267	48.5663	36.0957	41.3369	-0.225292	1	3.66013	7e-16	3.13029	3.35e-07
Lacdel1|2643255	Lacdel1	2643255	gene_13175	Induced during mycorrhization	4 and 6 wpi	C	IX	NA	NA	NA	NA	NA	NA	NA	NA	NA	PF04082	Fungal_trans	NA	Transcription factor	Fungal specific transcription factor domain	OG0000069	2.35157	2.09772	2.1984	2.02758	2.48379	2.17326	22.7794	28.7306	32.5443	20.9634	18.773	25.7481	0.182105	1	4.07619	1.9e-24	3.72354	1.37e-16
Lacdel1|2657088	Lacdel1	2657088	gene_5736	Induced during mycorrhization	4 and 6 wpi	E	IX	Secreted	NA	GH47	NA	NA	NA	NA	3.2.1.113	Mannosyl-oligosaccharide 1,2-alpha-mannosidase.	PF01532	Glyco_hydro_47	Carbohydrate transport and metabolism	CAZyme	Glycoside Hydrolase	OG0002084	0.514378	0.429621	0.181312	0.470658	0.538215	0.736747	8.17135	4.56314	8.13708	12.4223	5.02322	5.49072	0.713608	1	4.57808	1.51e-05	4.68696	5.5e-06
Lacdel1|2675366	Lacdel1	2675366	gene_7670	Induced during mycorrhization	4 wpi only	J	IX	NA	NA	NA	NA	NA	NA	NA	1.6.99.1	NADPH dehydrogenase.	PF00724	Oxidored_FMN	Energy production and conversion ; General function prediction only	Other function	NADPH dehydrogenase.	OG0000206	27.5349	32.4975	49.9197	82.5739	75.2702	147.886	248.911	237.164	197.918	251.341	148.754	173.303	1.56484	1	3.01567	0.0159141	2.75453	0.267941
Lacdel1|2676036	Lacdel1	2676036	gene_13310	Induced during mycorrhization	4 and 6 wpi	C	IX	NA	NA	AA3_3	PartialPCWdegradation	NA	NA	NA	1.1.3.13	Alcohol oxidase.	PF00732,PF05199	GMC_oxred_N,GMC_oxred_C	General function prediction only	CAZyme	Alcohol oxidase	OG0010150	1.08257	0.61449	0.661221	0.549905	0.673779	2.06829	46.1188	27.8813	19.0602	18.0725	12.9309	11.101	0.525936	1	5.58569	1.19e-14	4.45712	9.63e-07
Lacdel1|2676421	Lacdel1	2676421	gene_10635	Induced during mycorrhization	6 wpi only	C	IX	NA	NA	NA	NA	NA	NA	NA	NA	NA	PF00071,PF08477,PF00025,PF01926	Ras,Roc,Arf,MMR_HSR1	General function prediction only	Other function	small GTP-binding protein	OG0001470	13.9541	10.2941	9.89279	12.4182	12.8957	18.5945	23.3308	16.0573	10.329	56.8062	73.2436	105.035	0.390202	1	0.998263	1	2.90841	0.0343376
Lacdel1|278139	Lacdel1	278139	gene_14018	Induced during mycorrhization	4 and 6 wpi	C	IX	NA	NA	NA	NA	NA	NA	NA	NA	NA	PF07690	MFS_1	Carbohydrate transport and metabolism	Transporter/Permease	Unknown transporter	OG0004072	9.96049	9.1774	8.85127	9.59661	10.4687	10.431	23.21	23.444	24.9623	48.7325	59.7068	51.3855	0.279561	1	2.78271	0.00200742	4.26228	2.16e-30
Lacdel1|288395	Lacdel1	288395	gene_16312	Induced during mycorrhization	4 wpi only	E	IX	Secreted	NA	NA	NA	NA	NA	NA	NA	NA	PF07470	Glyco_hydro_88	NA	Other function	Holds a GH88 domain	OG0008817	0.827017	0.927767	0.686237	0.648948	0.547283	0.466594	5.77511	5.75222	6.05923	3.17102	1.7375	3.34434	-0.612425	1	3.69678	6.84e-05	2.55985	1
Lacdel1|444828	Lacdel1	444828	gene_7114	Induced during mycorrhization	6 wpi only	E	IX	NA	NA	NA	NA	NA	NA	NA	NA	NA	PF07690,PF00083	MFS_1,Sugar_tr	General function prediction only	Transporter/Permease	Sugar transporter	OG0008180	4.20607	4.28953	4.13118	3.2966	3.74142	3.58739	7.72534	5.91275	6.01588	28.4836	29.7464	57.4526	-0.121438	1	1.11395	1	3.58555	1.72e-07
Lacdel1|510737	Lacdel1	510737	gene_6571	Induced during mycorrhization	4 wpi only	J	IX	NA	NA	NA	NA	NA	NA	NA	NA	NA	PF00083,PF07690	Sugar_tr,MFS_1	General function prediction only	Transporter/Permease	Sugar transporter	OG0007392	20.3776	20.9815	21.0782	13.3079	13.8887	11.2061	213.08	322.423	312.953	115.971	75.0348	123.546	-0.611363	1	4.06831	1.95e-21	2.65098	0.0542861
Lacdel1|553261	Lacdel1	553261	gene_121	Induced during mycorrhization	4 and 6 wpi	J	IX	NA	NA	NA	NA	NA	NA	NA	NA	NA	PF07690	MFS_1	Carbohydrate transport and metabolism	Transporter/Permease	Unknown transporter	OG0008054	3.07096	2.30575	3.0953	4.21605	7.49358	4.37712	715.953	923.009	890.926	129.346	76.2031	195.951	1.62266	1	9.65751	3.42e-90	6.97204	1.36e-37
Lacdel1|632447	Lacdel1	632447	gene_7728	Induced during mycorrhization	4 wpi only	C	IX	Secreted	NA	NA	NA	NA	NA	NA	3.4.23.5	Cathepsin D.	PF00026,PF14543	Asp,TAXi_N	Posttranslational modification, protein turnover, chaperones	Protease	Pepsin (A1)	OG0003834	11.7927	11.6884	13.5699	9.19474	10.0747	11.7986	71.1017	51.0536	86.7709	48.4944	35.1524	44.8684	-0.198511	1	2.86423	0.00224558	2.12858	1
Lacdel1|673503	Lacdel1	673503	gene_7974	Induced during mycorrhization	4 wpi only	C	IX	NA	NA	NA	NA	NA	NA	NA	NA	NA	PF00011	HSP20	Posttranslational modification, protein turnover, chaperones	Other function	heat shock protein Hsp20 / chaperones	OG0002414	2.03062	3.37977	3.68645	2.38903	3.17359	10.9392	144.184	241.881	164.074	32.9185	6.35071	104.082	0.998964	1	6.31982	3.39e-05	4.39155	0.177955
Lacdel1|70655	Lacdel1	70655	gene_5935	Induced during mycorrhization	4 wpi only	C	IX	Secreted	NA	GH131	Cellulose	NA	NA	NA	NA	NA	NA	NA	NA	CAZyme	Glycoside Hydrolase	OG0005821	4.22529	5.82698	4.32595	2.52838	2.69958	4.28119	29.0282	21.5897	24.7905	17.2496	18.363	14.1422	-0.670091	1	2.77272	0.0228231	2.15466	1
Lacdel1|MSTRG.1230	Lacdel1	NA	MSTRG.1230	Induced during mycorrhization	4 and 6 wpi	E	IX	NA	46117370|GX|abH34	NA	NA	NA	NA	NA	NA	NA	PF00450	Peptidase_S10	NA	Unknown	Inconsistent annotation	OG0010939	0.272006	0	0	0.082091	0.041037	0.233315	12.9728	10.5355	13.823	22.8378	13.4203	16.9843	0.379992	1	7.40437	6.01e-13	7.83773	4.9e-15
Lacdel1|MSTRG.1796	Lacdel1	NA	MSTRG.1796	Induced during mycorrhization	4 wpi only	E	IX	SSP	NA	NA	NA	NA	NA	NA	NA	NA	PF09286	Pro-kuma_activ	NA			OG0009411	0.790778	1.16388	0.689192	0.541225	0.405242	0.898304	4.76879	4.17101	4.93182	3.26334	2.43263	2.7755	-0.436501	1	2.95669	0.0164134	2.15443	1
Lacdel1|MSTRG.5250	Lacdel1	NA	MSTRG.5250	Induced during mycorrhization	4 wpi only	C	IX	NA	NA	NA	NA	NA	NA	NA	NA	NA	PF000933	Glyco_hydro_3	NA	Protease	gamma-glutamyl hydrolase (C26)	OG0009070	5.15852	4.93587	4.16436	3.5866	3.32565	2.90429	55.7728	65.6695	63.5035	36.6393	20.8511	35.754	-0.118462	1	4.13008	1.53e-05	3.02112	0.45695
Lacdel1|MSTRG.8130	Lacdel1	NA	MSTRG.8130	Induced during mycorrhization	4 wpi only	E	IX	NA	NA	NA	NA	NA	NA	NA	NA	NA	NA	NA	NA	Unknown	Unknown	OG0016653	0.16846	0.154899	0.151505	0	0.145041	0.405305	3.48466	5.47051	2.96298	2.52525	2.25665	2.16168	2.8146	1	6.32213	0.0282306	5.3647	0.31065
Lacdel1|MSTRG.8567	Lacdel1	NA	MSTRG.8567	Induced during mycorrhization	4 and 6 wpi	C	IX	NA	CAH17527|GGGX|abH03	NA	NA	NA	NA	NA	NA	NA	NA	NA	NA	Lipase	Putative triacylglycerol lipase.	OG0013064	0.900451	1.16594	1.05615	0.9825	1.00633	0.947559	46.6617	72.2347	60.7001	21.4543	22.4543	32.1085	0.0327314	1	6.14678	5.41e-71	4.91892	1.48e-34
Lacdel1|MSTRG.9631	Lacdel1	NA	MSTRG.9631	Induced during mycorrhization	4 wpi only	J	IX	NA	NA	NA	NA	NA	NA	NA	NA	NA	NA	NA	NA	Unknown	Unknown	OG0002767	21.3744	22.2064	22.2608	23.6685	23.8551	22.6576	410.585	267.936	139.833	89.8511	141.87	43.7869	0.238531	1	4.15048	8.81e-07	2.52145	1
Lacdel1|1091881	Lacdel1	1091881	gene_10272	Induced during mycorrhization	4 wpi only	E	VI	NA	NA	NA	NA	NA	NA	NA	NA	NA	NA	NA	NA	Unknown	Unknown	OG0008656	2.09514	1.40078	2.70459	1.52258	3.75151	3.01648	17.0543	12.3653	11.1339	6.31749	6.67755	5.88212	0.592831	1	3.17013	0.00446307	2.08844	1
Lacdel1|1255026	Lacdel1	1255026	gene_2358	Induced during mycorrhization	4 wpi only	I	VI	NA	NA	NA	NA	NA	NA	NA	NA	NA	PF14604	SH3_9	NA	Other function	Holds a SH3 domain	OG0007593	79.7423	88.1414	74.6649	72.3891	68.8457	61.6222	683.823	491.758	499.379	370.298	277.342	271.42	-0.102666	1	3.24073	1.28e-08	2.33288	1
Lacdel1|1279693	Lacdel1	1279693	gene_2565	Induced during mycorrhization	4 and 6 wpi	B	VI	NA	NA	NA	NA	24c1__3QDY Fungal fruit body lectin	NA	NA	NA	NA	PF07367	FB_lectin	NA	Lectin	Fungal fruit body lectin	OG0000849	4.61951	5.01511	4.26123	3.75436	3.98891	6.30035	436.426	350.605	200.577	180.583	63.479	124.168	0.146249	1	6.47463	1.96e-28	5.03119	6.66e-13
Lacdel1|128109	Lacdel1	128109	gene_3818	Induced during mycorrhization	4 and 6 wpi	E	VI	NA	NA	NA	NA	NA	NA	NA	NA	NA	PF06314	ADC	NA	Other function	Acetoacetate decarboxylase	OG0001050	0.702149	0.860568	0.220206	0.368399	0.843697	0.947723	8.37541	7.7224	6.13101	5.58611	10.8222	15.7449	0.592119	1	4.15016	0.000925676	4.42344	8.84e-05
Lacdel1|1386621	Lacdel1	1386621	gene_12109	Induced during mycorrhization	4 and 6 wpi	E	VI	NA	NA	NA	NA	NA	NA	NA	NA	NA	PF13813	MBOAT_2	NA	Other function	Membrane bound O-acyl transferase	OG0000207	0.322504	0.305684	0.38393	0.425574	0.14729	0.355503	4.84099	4.7509	7.56026	3.62173	2.34381	4.20724	0.0199875	1	4.40426	3.2e-06	3.59531	0.0150996
Lacdel1|159818	Lacdel1	159818	gene_4133	Induced during mycorrhization	4 and 6 wpi	I	VI	NA	NA	NA	NA	NA	NA	NA	NA	NA	NA	NA	NA	Unknown	Unknown	OG0005358	76.8013	75.6534	61.508	71.0389	71.0817	75.0006	425.526	374.972	380.057	515.326	467.865	296.176	0.150059	1	2.87723	0.000387438	2.96522	5.65e-05
Lacdel1|1604680	Lacdel1	1604680	gene_10969	Induced during mycorrhization	4 and 6 wpi	C	VI	NA	NA	NA	NA	NA	NA	NA	NA	NA	NA	NA	NA	Unknown	Unknown	OG0001182	1.76029	2.3718	3.18922	6.9506	5.82184	11.3996	37.7977	27.4864	30.5155	25.975	13.7743	15.9598	2.0342	1	4.37723	3.28e-10	3.5521	0.000344092
Lacdel1|1757480	Lacdel1	1757480	gene_11916	Induced during mycorrhization	4 and 6 wpi	I	VI	NA	NA	NA	NA	NA	NA	NA	NA	NA	NA	NA	NA	Unknown	Unknown	OG0015053	32.6962	38.7323	43.7383	31.2462	29.3486	42.0915	604.621	460.374	392.724	451.6	360.891	359.558	0.0211484	1	4.14108	1.06e-21	3.75631	1.8e-14
Lacdel1|1798856	Lacdel1	1798856	gene_5330	Induced during mycorrhization	4 and 6 wpi	C	VI	NA	NA	NA	NA	NA	NA	NA	NA	NA	NA	NA	NA	Unknown	Unknown	OG0001722	1.53528	1.17627	1.51029	2.47881	1.94306	2.66436	46.5376	45.5983	44.225	39.7043	25.9812	33.6543	1.07662	1	5.63232	4.64e-18	5.17654	1.25e-13
Lacdel1|1834103	Lacdel1	1834103	gene_12313	Induced during mycorrhization	4 and 6 wpi	E	VI	NA	NA	NA	NA	NA	NA	NA	NA	NA	NA	NA	NA	Unknown	Unknown	OG0011674	0.535924	0.7596	0.649339	0.895512	0.579969	0.733967	4.16683	4.71834	6.17425	16.7803	30.2712	23.1947	0.443946	1	3.33081	0.000580878	5.51978	1.11e-29
Lacdel1|1834370	Lacdel1	1834370	gene_12314	Induced during mycorrhization	4 and 6 wpi	B	VI	NA	NA	NA	NA	NA	NA	NA	NA	NA	PF00168	C2	Intracellular trafficking, secretion, and vesicular transport ; Signal transduction mechanisms	Other function	Holds a C2 domain	OG0012102	2.23366	3.40365	2.28039	2.88035	4.19867	4.9258	62.7536	90.6447	101.461	120.649	178.485	180.733	0.674183	1	5.34341	2.55e-37	6.26468	5.93e-61
Lacdel1|2183410	Lacdel1	2183410	gene_398	Induced during mycorrhization	6 wpi only	J	VI	NA	NA	NA	NA	NA	NA	NA	NA	NA	NA	NA	NA	Unknown	Unknown	OG0010450	36.8193	46.0526	45.089	57.4776	44.4787	53.7828	103.768	80.8433	56.9936	393.766	473.428	300.316	0.419528	1	1.2485	1	3.4269	1.83e-08
Lacdel1|2216763	Lacdel1	2216763	gene_3656	Induced during mycorrhization	4 wpi only	J	VI	NA	NA	NA	NA	24c1__3QDY Fungal fruit body lectin	NA	NA	NA	NA	PF07367	FB_lectin	NA	Lectin	Fungal fruit body lectin	OG0004761	19.0617	18.7695	19.8186	19.6166	47.8397	157.587	1236.38	1807.92	547.74	80.2677	19.1509	44.7377	1.82648	1	6.1537	1.74e-07	1.53165	1
Lacdel1|2219977	Lacdel1	2219977	gene_4151	Induced during mycorrhization	4 wpi only	J	VI	SSP	NA	NA	NA	NA	NA	NA	NA	NA	PF11937	DUF3455	NA	Unknown	Unknown	OG0002595	26.7188	26.8118	32.5716	37.7134	45.4142	50.7205	194.868	123.561	159.416	97.5748	101.024	90.6046	0.844981	1	2.93373	0.000266507	2.09894	1
Lacdel1|2224728	Lacdel1	2224728	gene_9403	Induced during mycorrhization	4 and 6 wpi	J	VI	NA	NA	NA	NA	NA	NA	NA	NA	NA	PF11710	Git3	NA	Other function	G protein-coupled glucose receptor	OG0005286	22.5578	26.4143	23.2253	22.3081	27.0005	22.813	463.627	436.381	496.652	286.707	179.331	219.86	0.0961295	1	4.72743	8.48e-48	3.69519	3.29e-18
Lacdel1|2232654	Lacdel1	2232654	gene_15494	Induced during mycorrhization	4 wpi only	J	VI	NA	NA	NA	NA	NA	NA	NA	NA	NA	PF01822	WSC	Carbohydrate transport and metabolism ; Posttranslational modification, protein turnover, chaperones	Other function	Holds a WSC domain	OG0000699	25.9383	21.0959	20.3071	25.9388	31.4894	28.7045	269.292	214.225	258.947	122.366	87.283	163.581	0.399063	1	3.62436	4.05e-12	2.62116	0.12122
Lacdel1|2233670	Lacdel1	2233670	gene_17384	Induced during mycorrhization	4 and 6 wpi	J	VI	NA	NA	NA	NA	NA	NA	NA	NA	NA	NA	NA	NA	Unknown	Unknown	OG0002479	7.19865	14.5058	17.3282	23.4523	41.2618	46.8902	171.353	122.278	218.973	262.543	163.528	268.772	1.70425	1	4.21676	3.05e-09	4.64158	4.47e-13
Lacdel1|2289821	Lacdel1	2289821	gene_6332	Induced during mycorrhization	4 and 6 wpi	C	VI	NA	NA	NA	NA	NA	NA	NA	NA	NA	NA	NA	NA	Unknown	Unknown	OG0010094	1.83493	2.20256	1.29934	1.69422	1.56988	1.6469	25.6345	28.6274	26.8542	23.73	21.8473	21.5898	-0.031364	1	4.32836	3.86e-18	4.04303	9.96e-14
Lacdel1|2310491	Lacdel1	2310491	gene_2797	Induced during mycorrhization	4 and 6 wpi	I	VI	SSP	NA	NA	NA	NA	NA	NA	NA	NA	NA	NA	NA	Unknown	Unknown	OG0008945	79.4759	91.5804	92.4872	108.061	115.819	126.493	1917.1	1848.53	1962.43	933.455	569.925	897.147	0.507165	1	4.65389	5.49e-46	3.38024	2.81e-12
Lacdel1|2312479	Lacdel1	2312479	gene_4522	Induced during mycorrhization	4 and 6 wpi	C	VI	NA	NA	NA	NA	NA	NA	NA	NA	NA	NA	NA	NA	Unknown	Unknown	OG0012265	0.879258	1.21688	0.86557	0.456757	0.803794	0.226118	31.268	39.5355	45.6312	46.2999	25.7143	40.0817	-0.660099	1	5.57847	2.49e-23	5.45673	1.16e-21
Lacdel1|2312968	Lacdel1	2312968	gene_3846	Induced during mycorrhization	6 wpi only	E	VI	NA	NA	NA	NA	NA	NA	NA	NA	NA	PF00651	BTB	NA	Transcription factor	Holds a BTB domain	OG0015272	3.38713	5.06143	3.16731	2.07221	3.76016	3.47154	18.6532	8.28044	6.64604	28.1556	66.2879	31.5297	-0.378445	1	1.92902	1	3.90814	0.000351329
Lacdel1|2316477	Lacdel1	2316477	gene_9051	Induced during mycorrhization	4 and 6 wpi	C	VI	Secreted	NA	NA	NA	NA	S53	non-cannonical region	3.4.14.9	Tripeptidyl-peptidase I.	PF09286	Pro-kuma_activ	NA	Protease	Sedolisin (S53)	OG0000848	1.81234	2.35037	2.09929	1.14199	1.9238	2.02524	20.3102	20.664	12.6472	22.6341	11.1464	19.6046	-0.190187	1	3.53272	4.11e-05	3.48328	9.98e-05
Lacdel1|2332881	Lacdel1	2332881	gene_40	Induced during mycorrhization	4 and 6 wpi	J	VI	NA	NA	NA	NA	NA	NA	NA	NA	NA	NA	NA	NA	Unknown	Unknown	OG0009903	15.9553	16.618	15.3796	16.7698	19.7318	19.2947	574.567	531.304	500.717	140.347	196.135	364.358	0.289359	1	5.3654	7.78e-34	4.18239	4.73e-14
Lacdel1|2340249	Lacdel1	2340249	gene_3208	Induced during mycorrhization	4 wpi only	J	VI	NA	NA	NA	NA	NA	NA	NA	NA	NA	NA	NA	NA	Unknown	Unknown	OG0004699	35.609	24.2375	32.472	37.1078	42.8837	45.697	125.289	172.813	188.579	81.274	88.526	105.035	0.507063	1	2.72531	0.00363883	1.91355	1
Lacdel1|2344338	Lacdel1	2344338	gene_3355	Induced during mycorrhization	6 wpi only	J	VI	NA	NA	NA	NA	NA	NA	NA	NA	NA	NA	NA	NA	Unknown	Unknown	OG0001199	36.5551	41.6989	28.0847	18.9639	7.70279	14.6097	122.797	96.0806	68.508	261.909	223.253	171.135	-1.31123	1	1.82659	1	3.01325	0.0348068
Lacdel1|2351262	Lacdel1	2351262	gene_5331	Induced during mycorrhization	4 and 6 wpi	C	VI	NA	NA	NA	NA	NA	NA	NA	NA	NA	NA	NA	NA	Unknown	Unknown	OG0001094	0.390968	0.915819	0.730887	1.5517	0.518295	1.2105	20.6433	26.2685	26.6715	18.6617	17.0946	27.089	1.09309	1	5.59852	4.15e-12	5.38089	1.46e-10
Lacdel1|2357670	Lacdel1	2357670	gene_6031	Induced during mycorrhization	4 wpi only	J	VI	NA	NA	NA	NA	NA	NA	NA	NA	NA	NA	NA	NA	Unknown	Unknown	OG0001210	59.2435	46.7167	47.2129	51.2341	62.7585	48.852	327.891	288.142	249.237	144.094	140.738	123.361	0.221433	1	2.92804	9.05e-07	1.84646	1
Lacdel1|2366469	Lacdel1	2366469	gene_6339	Induced during mycorrhization	4 and 6 wpi	C	VI	NA	NA	NA	NA	NA	NA	NA	NA	NA	NA	NA	NA	Unknown	Unknown	OG0009290	5.38317	4.3924	3.22225	3.41526	2.66911	4.37633	54.0421	33.5503	31.7869	89.2039	104.767	70.7103	-0.115956	1	3.61886	1.28e-06	4.7501	2.19e-19
Lacdel1|2375378	Lacdel1	2375378	gene_8385	Induced during mycorrhization	4 and 6 wpi	E	VI	NA	NA	NA	NA	NA	NA	NA	NA	NA	NA	NA	NA	Unknown	Unknown	OG0011775	1.46641	0.766392	1.88135	1.86913	1.23663	1.31747	9.59102	6.3149	11.223	50.5148	37.74	60.9902	0.298652	1	3.17478	0.0174489	5.62312	2.59e-25
Lacdel1|2386369	Lacdel1	2386369	gene_8870	Induced during mycorrhization	4 and 6 wpi	C	VI	NA	NA	NA	NA	NA	NA	NA	NA	NA	PF00646	F-box	NA	Other function	Holds a F-box domain	OG0006587	0.654558	0.700639	0.811904	0.765833	1.09501	1.38626	29.7154	20.0588	21.6959	19.708	20.9952	18.7282	0.595716	1	5.33029	1.01e-17	5.09075	4.33e-15
Lacdel1|2394079	Lacdel1	2394079	gene_9027	Induced during mycorrhization	4 and 6 wpi	C	VI	NA	NA	NA	NA	NA	NA	NA	NA	NA	PF01822	WSC	Carbohydrate transport and metabolism ; Posttranslational modification, protein turnover, chaperones	Protease	Peptidase subfamily P2	OG0001861	4.71722	4.4721	3.78786	5.91532	6.27737	8.22233	30.4996	22.7876	30.8449	35.9712	24.3468	24.2697	0.733059	1	3.06206	0.000866445	3.03596	0.00151874
Lacdel1|2404600	Lacdel1	2404600	gene_10775	Induced during mycorrhization	6 wpi only	E	VI	NA	NA	NA	NA	NA	NA	NA	NA	NA	PF00036,PF13405,PF13499,PF13202,PF13833	EF-hand_1,EF-hand_6,EF-hand_7,EF-hand_5,EF-hand_8	Signal transduction mechanisms	Other function	EF-hand	OG0007148	0.229119	0.722861	0	0	0	0.252837	2.64133	1.79246	2.04348	10.0875	13.3292	15.482	-2.0744	1	2.94278	1	5.54196	1.39e-10
Lacdel1|2413392	Lacdel1	2413392	gene_12736	Induced during mycorrhization	6 wpi only	J	VI	NA	NA	NA	NA	NA	NA	NA	NA	NA	NA	NA	NA	Unknown	Unknown	OG0001199	42.2724	44.3781	35.441	21.5081	8.60328	18.6065	126.996	108.45	78.261	292.673	248.157	184.748	-1.23846	1	1.75653	1	2.95835	0.0485131
Lacdel1|2414187	Lacdel1	2414187	gene_11915	Induced during mycorrhization	4 and 6 wpi	J	VI	NA	NA	NA	NA	NA	NA	NA	NA	NA	NA	NA	NA	Unknown	Unknown	OG0015764	25.4653	24.9236	31.7158	17.2038	15.483	25.2128	308.105	260.532	226.774	271.249	198.108	204.164	-0.317042	1	3.66413	4.17e-12	3.42564	9.61e-09
Lacdel1|2420695	Lacdel1	2420695	gene_15242	Induced during mycorrhization	4 wpi only	E	VI	NA	NA	NA	NA	NA	NA	NA	NA	NA	NA	NA	NA	Unknown	Unknown	OG0003451	1.21672	1.10207	1.06371	1.44443	3.37273	2.99732	10.9881	9.80279	9.98242	9.34104	8.58978	4.25347	1.38643	1	3.60744	0.000597498	3.14287	0.0737851
Lacdel1|2429671	Lacdel1	2429671	gene_15298	Induced during mycorrhization	4 wpi only	J	VI	NA	NA	NA	NA	NA	NA	NA	1.14.13.8	Dimethylaniline monooxygenase (N-oxide forming).	PF00743,PF13434,PF07992,PF01266,PF00890,PF13450,PF13738	FMO-like,K_oxygenase,Pyr_redox_2,DAO,FAD_binding_2,NAD_binding_8,Pyr_redox_3	Secondary metabolites biosynthesis, transport and catabolism	Other function	Dimethylaniline monooxygenase (N-oxide forming).	OG0003329	35.0428	50.4993	38.0552	53.4685	33.7793	43.2681	161.739	235.274	234.254	123.948	119.051	143.441	0.216876	1	2.74663	0.00340485	2.04663	1
Lacdel1|243195	Lacdel1	243195	gene_16475	Induced during mycorrhization	4 and 6 wpi	J	VI	NA	NA	NA	NA	NA	NA	NA	NA	NA	NA	NA	NA	Unknown	Unknown	OG0002479	8.92332	12.5886	18.2417	28.0907	41.9763	51.5987	143.626	112.404	185.131	179.104	129.154	179.105	1.87743	1	4.05656	8.57e-10	4.16397	9.13e-11
Lacdel1|2459924	Lacdel1	2459924	gene_18354	Induced during mycorrhization	6 wpi only	E	VI	NA	NA	NA	NA	NA	NA	NA	NA	NA	NA	NA	NA	Unknown	Unknown	OG0008753	2.31616	2.32414	2.48592	2.94627	2.92109	4.7807	12.9047	9.20107	6.202	19.1803	16.3449	12.9114	0.689592	1	2.28954	1	3.06005	0.0123246
Lacdel1|2506720	Lacdel1	2506720	gene_9429	Induced during mycorrhization	4 and 6 wpi	E	VI	NA	NA	NA	NA	NA	NA	NA	NA	NA	PF00067	p450	Secondary metabolites biosynthesis, transport and catabolism	Cytochrome p450		OG0003939	1.20412	1.10647	1.1028	1.29918	0.86643	0.827576	10.4388	10.9302	10.1408	37.3161	57.7894	76.3249	-0.12788	1	3.54917	7.7e-06	5.94886	7.72e-40
Lacdel1|2507660	Lacdel1	2507660	gene_14327	Induced during mycorrhization	4 wpi only	E	VI	NA	NA	NA	NA	NA	NA	NA	NA	NA	NA	NA	NA	Unknown	Unknown	OG0003658	1.26002	1.26988	1.62021	1.00026	0.674242	1.45658	22.4796	13.3004	14.4445	6.53693	3.51541	2.77786	-0.167768	1	3.99789	6.36e-06	2.10666	1
Lacdel1|2514183	Lacdel1	2514183	gene_2742	Induced during mycorrhization	4 and 6 wpi	C	VI	NA	NA	NA	NA	NA	NA	NA	NA	NA	PF13813	MBOAT_2	NA	Other function	Membrane bound O-acyl transferase	OG0001257	2.22714	3.14045	2.61792	2.25148	5.71184	15.8078	197.673	151.559	169.431	65.7631	65.5623	130.217	1.60745	1	6.4228	1.69e-11	5.39574	1.12e-06
Lacdel1|2515827	Lacdel1	2515827	gene_4452	Induced during mycorrhization	6 wpi only	C	VI	SSP	NA	NA	NA	NA	NA	NA	NA	NA	PF01764	Lipase_3	NA	Lipase	Unknown lipase	OG0011601	3.07779	3.22443	1.07954	1.98036	2.48237	2.72144	23.3197	9.06458	15.9212	31.2613	20.8397	13.3195	0.217494	1	3.18876	0.121965	3.64577	0.003568
Lacdel1|2515979	Lacdel1	2515979	gene_5696	Induced during mycorrhization	6 wpi only	C	VI	NA	NA	NA	NA	NA	NA	NA	NA	NA	PF14494	DUF4436	NA	Unknown	Unknown	OG0005803	5.07648	6.37335	5.75521	3.55376	2.91811	4.52052	36.2485	25.0534	24.5365	56.8179	29.1441	62.4758	-0.429965	1	2.87331	0.110948	3.632	4.67e-06
Lacdel1|2516326	Lacdel1	2516326	gene_5984	Induced during mycorrhization	4 and 6 wpi	I	VI	NA	NA	NA	NA	NA	NA	NA	NA	NA	PF03795	YCII	NA	Other function	Holds a YCII domain	OG0007133	28.2741	26.8691	30.832	46.8354	40.2693	38.1102	441.525	290.832	422.553	723.744	337.194	391.345	0.661072	1	4.10936	1.1e-11	4.39006	6.5e-15
Lacdel1|2516605	Lacdel1	2516605	gene_3882	Induced during mycorrhization	4 wpi only	E	VI	NA	NA	NA	NA	NA	NA	NA	NA	NA	NA	NA	NA	Unknown	Unknown	OG0003716	2.37454	2.70152	2.0257	1.77758	2.8074	2.55898	20.6298	12.6141	12.91	10.6531	6.91592	9.16299	0.178366	1	3.09269	0.0256818	2.26148	1
Lacdel1|2518496	Lacdel1	2518496	gene_8321	Induced during mycorrhization	4 and 6 wpi	E	VI	NA	NA	NA	NA	NA	NA	NA	NA	NA	PF09286	Pro-kuma_activ	NA			OG0004341	0.376291	0	0	0.502762	0.682898	0	0	0	0	0	0	0	-0.426935	1	4.23492	1.2e-05	3.4227	0.0415377
Lacdel1|2519175	Lacdel1	2519175	gene_8008	Induced during mycorrhization	6 wpi only	C	VI	NA	NA	NA	NA	NA	NA	NA	NA	NA	NA	NA	NA	Unknown	Unknown	OG0009333	6.81308	7.66395	7.10705	8.06756	7.75685	8.06002	14.1558	11.8271	11.668	60.1931	43.0518	52.847	0.276501	1	1.01926	1	3.08765	3.66e-07
Lacdel1|2520140	Lacdel1	2520140	gene_7704	Induced during mycorrhization	4 wpi only	J	VI	NA	NA	NA	NA	NA	NA	NA	NA	NA	NA	NA	NA	Unknown	Unknown	OG0009615	22.2086	24.7298	21.4807	23.0229	22.4452	23.8613	90.8787	85.9579	96.8768	92.6679	75.3754	89.2264	0.15602	1	2.43946	0.0355777	2.31389	0.518203
Lacdel1|2520950	Lacdel1	2520950	gene_8601	Induced during mycorrhization	6 wpi only	E	VI	NA	NA	NA	NA	NA	NA	NA	NA	NA	PF01185	Hydrophobin	NA	Other function	Hydrophobin	OG0002374	3.13281	3.19333	3.85318	1.93389	1.51056	2.7348	1.26369	2.22894	1.16972	82.5547	43.4169	55.3456	-0.449664	1	-0.691932	1	4.05532	9.51e-09
Lacdel1|2521923	Lacdel1	2521923	gene_12074	Induced during mycorrhization	4 and 6 wpi	J	VI	NA	NA	NA	NA	NA	NA	NA	NA	NA	NA	NA	NA	Unknown	Unknown	OG0008732	16.2718	13.8453	14.3841	10.0577	19.9721	13.8805	162.016	147.277	181.62	154.314	77.367	96.3325	0.14472	1	3.80073	1.19e-08	3.19088	0.00114428
Lacdel1|2522419	Lacdel1	2522419	gene_8193	Induced during mycorrhization	4 and 6 wpi	J	VI	NA	NA	NA	NA	NA	NA	NA	NA	NA	NA	NA	NA	Unknown	Unknown	OG0012683	46.7942	47.4608	49.9714	35.2153	32.8897	42.6312	344.565	263.647	291.357	256.576	189.664	248.744	-0.274556	1	3.00529	8.63e-07	2.61667	0.0192488
Lacdel1|2523235	Lacdel1	2523235	gene_11322	Induced during mycorrhization	4 and 6 wpi	J	VI	NA	NA	NA	NA	NA	NA	NA	NA	NA	NA	NA	NA	Unknown	Unknown	OG0008774	9.70805	12.5241	11.0158	9.3582	17.2634	16.391	861.011	445.419	222.892	404.493	355.663	67.4262	0.629902	1	5.86051	4.1e-07	4.96556	0.00040683
Lacdel1|2523866	Lacdel1	2523866	gene_10869	Induced during mycorrhization	4 and 6 wpi	J	VI	NA	NA	NA	NA	NA	NA	NA	NA	NA	NA	NA	NA	Unknown	Unknown	OG0003735	38.5391	31.5556	29.6124	36.1404	42.6291	40.1353	206.504	138.481	186.096	249.423	236.541	202.302	0.393199	1	2.82634	0.000805189	3.17479	9.24e-08
Lacdel1|2529293	Lacdel1	2529293	gene_15378	Induced during mycorrhization	6 wpi only	E	VI	NA	NA	NA	NA	NA	NA	NA	NA	NA	NA	NA	NA	Unknown	Unknown	OG0008699	3.52187	4.46944	3.02119	4.58082	3.74543	3.81297	10.8149	8.57743	8.6952	46.0978	32.2231	32.2112	0.169071	1	1.63316	1	3.60618	2.16e-08
Lacdel1|2549620	Lacdel1	2549620	gene_4519	Induced during mycorrhization	4 and 6 wpi	E	VI	NA	NA	NA	NA	NA	NA	NA	NA	NA	NA	NA	NA	Unknown	Unknown	OG0009829	0.418964	0.27926	0.351252	0.330246	0.60564	0.671099	3.74415	3.45427	3.30476	5.49259	7.01953	15.8262	0.790759	1	3.86771	0.0304724	5.37827	9.47e-08
Lacdel1|2553948	Lacdel1	2553948	gene_12478	Induced during mycorrhization	4 and 6 wpi	E	VI	Secreted	NA	NA	NA	NA	NA	NA	3.4.14.9	Tripeptidyl-peptidase I.	PF09286	Pro-kuma_activ	NA			OG0016103	0.309437	0.165547	0	0.068623	0.126016	0.242091	4.92198	2.49886	1.94155	3.55518	1.20957	1.703	-0.740075	1	4.56505	0.00131118	4.102	0.0260952
Lacdel1|2554038	Lacdel1	2554038	gene_10871	Induced during mycorrhization	6 wpi only	E	VI	NA	NA	NA	NA	NA	NA	NA	NA	NA	PF06140	Ifi-6-16	NA	Other function	IFI-6-16	OG0016104	0	0	0.39247	0.260266	0	0.222547	0.634302	1.43267	1.39402	5.66947	3.67123	4.78833	0.377995	1	3.79641	1	5.70112	0.0264491
Lacdel1|2555693	Lacdel1	2555693	gene_14642	Induced during mycorrhization	4 and 6 wpi	E	VI	NA	NA	NA	NA	NA	NA	NA	NA	NA	PF01699	Na_Ca_ex	Inorganic ion transport and metabolism	Transporter/Permease	Sodium/calcium exchanger	OG0004718	0.455633	0.7699	0.547332	0.817062	0.538074	0.592606	4.54174	3.51441	3.13499	9.81769	8.29173	6.77557	0.140519	1	3.04503	0.0331137	4.1707	3.22e-10
Lacdel1|2558177	Lacdel1	2558177	gene_21840	Induced during mycorrhization	4 and 6 wpi	E	VI	NA	NA	NA	NA	NA	NA	NA	NA	NA	NA	NA	NA	Unknown	Unknown	OG0012801	0.202582	0.07575	0.242728	0.039616	0.050097	0.075906	1.08303	1.17132	2.21331	1.0454	1.75408	2.22736	-1.32674	1	3.70287	0.0370326	3.79309	0.0236119
Lacdel1|2568368	Lacdel1	2568368	gene_3848	Induced during mycorrhization	4 and 6 wpi	E	VI	NA	NA	NA	NA	NA	NA	NA	NA	NA	PF00651	BTB	NA	Transcription factor	Holds a BTB domain	OG0011269	0	0.187193	0.085244	0.190833	0	0.252737	2.14171	2.44138	2.3709	2.86798	11.9413	9.59136	0.167657	1	4.40857	0.0222572	6.19765	1.44e-07
Lacdel1|2577053	Lacdel1	2577053	gene_6207	Induced during mycorrhization	6 wpi only	J	VI	NA	NA	NA	NA	NA	NA	NA	NA	NA	PF01926,PF03193	MMR_HSR1,RsgA_GTPase	NA	Other function	ribosome-binding GTPase	OG0001476	21.5798	20.305	20.7526	26.0401	21.3792	20.1884	64.2359	84.4637	71.3673	82.6399	108.966	101.471	0.174	1	2.16149	1	2.59076	0.0018336
Lacdel1|2618441	Lacdel1	2618441	gene_9060	Induced during mycorrhization	4 and 6 wpi	E	VI	Secreted	NA	NA	NA	NA	S53	partial non-cannonical region	3.4.14.9	Tripeptidyl-peptidase I.	PF09286	Pro-kuma_activ	NA	Protease	Sedolisin (S53)	OG0016174	0.481283	0.684061	0.589969	0.367904	0.359851	0.856365	3.2222	2.74988	3.65079	4.49049	5.03397	4.77232	0.515592	1	3.93812	0.0111445	4.28234	0.000943963
Lacdel1|2627869	Lacdel1	2627869	gene_10401	Induced during mycorrhization	6 wpi only	E	VI	NA	NA	NA	NA	NA	NA	NA	NA	NA	NA	NA	NA	Unknown	Unknown	OG0008699	3.49667	5.82983	5.08287	4.64494	3.52667	4.09323	9.43603	7.95602	10.6409	46.3705	34.1368	34.9123	0.0004248	1	1.32054	1	3.37898	8.55e-08
Lacdel1|2672742	Lacdel1	2672742	gene_5908	Induced during mycorrhization	4 and 6 wpi	C	VI	SSP	NA	NA	NA	NA	NA	NA	NA	NA	PF01476	LysM	NA	Other function	LysM	OG0007169	9.764	9.44678	6.97143	9.4463	15.1239	14.5267	86.5972	64.6843	121.83	69.8782	78.3492	58.1588	0.643535	1	3.55609	9.4e-08	3.15697	0.000348146
Lacdel1|2676153	Lacdel1	2676153	gene_9029	Induced during mycorrhization	4 and 6 wpi	J	VI	SSP	NA	NA	NA	NA	NA	NA	NA	NA	PF01822	WSC	Carbohydrate transport and metabolism ; Posttranslational modification, protein turnover, chaperones	Other function	Holds a WSC domain	OG0001861	14.013	17.1254	17.2152	20.3421	21.7451	22.2713	671.743	613.218	752.735	467.57	243.883	403.882	0.424005	1	5.54229	1.01e-52	4.66665	1.22e-29
Lacdel1|320058	Lacdel1	320058	gene_6418	Induced during mycorrhization	6 wpi only	J	VI	NA	NA	NA	NA	NA	NA	NA	NA	NA	NA	NA	NA	Unknown	Unknown	OG0002058	14.34	16.2349	17.5248	14.2137	12.973	17.0826	59.1428	58.0856	46.6913	148.592	155.024	69.8871	-0.0248428	1	2.08145	1	3.23247	0.00011464
Lacdel1|320063	Lacdel1	320063	gene_6420	Induced during mycorrhization	4 and 6 wpi	J	VI	NA	NA	NA	NA	NA	NA	NA	NA	NA	NA	NA	NA	Unknown	Unknown	OG0010065	21.3216	26.4816	23.7563	25.9895	13.9486	19.5486	112.31	109.513	113.903	162.979	121.424	126.172	-0.0801484	1	2.64324	0.0487724	2.90774	0.000431767
Lacdel1|446410	Lacdel1	446410	gene_7123	Induced during mycorrhization	4 and 6 wpi	B	VI	NA	NA	NA	NA	NA	NA	NA	NA	NA	PF11937	DUF3455	NA	Unknown	Unknown	OG0003469	0	0.18682	0.63487	0.163203	2.16005	0.567306	220.337	180.986	231.501	113.894	93.9437	95.1657	1.4579	1	9.65309	2.14e-41	8.55704	4.42e-30
Lacdel1|471819	Lacdel1	471819	gene_8328	Induced during mycorrhization	4 and 6 wpi	E	VI	NA	NA	NA	NA	NA	NA	NA	NA	NA	NA	NA	NA	Unknown	Unknown	OG0008719	1.49719	1.75983	1.84216	1.08827	1.04392	0.506248	15.5578	15.212	14.4603	30.3429	22.1473	19.4283	-0.948126	1	3.3714	1.69e-05	4.04761	1.56e-12
Lacdel1|503511	Lacdel1	503511	gene_6514	Induced during mycorrhization	4 and 6 wpi	J	VI	SSP	NA	NA	NA	NA	NA	NA	NA	NA	NA	NA	NA	Unknown	Unknown	OG0016310	28.9517	36.0115	40.0976	42.8829	41.7355	48.5452	221.065	183.716	227.828	168.73	123.223	202.944	0.506666	1	2.95143	3.3e-05	2.61615	0.0452889
Lacdel1|819335	Lacdel1	819335	gene_20661	Induced during mycorrhization	4 wpi only	C	VI	NA	NA	NA	NA	NA	NA	NA	NA	NA	NA	NA	NA	Unknown	Unknown	OG0008732	15.2565	17.538	15.2336	10.7625	15.9867	13.2485	92.5875	89.7278	91.8245	77.8326	45.5988	53.4323	-0.176152	1	2.66482	0.0285496	2.02605	1
Lacdel1|8369	Lacdel1	8369	gene_980	Induced during mycorrhization	4 wpi only	J	VI	NA	NA	NA	NA	NA	NA	NA	NA	NA	NA	NA	NA	Unknown	Unknown	OG0006951	28.1231	31.6278	33.4869	59.3893	36.2024	65.4766	238.064	169.272	195.987	171.173	124.825	156.501	0.957562	1	3.20655	3.72e-05	2.75057	0.069534
Lacdel1|87238	Lacdel1	87238	gene_14614	Induced during mycorrhization	4 wpi only	E	VI	NA	NA	NA	NA	NA	NA	NA	NA	NA	PF10346	Con-6	NA	Other function	Conidiation protein 6	OG0005620	0.659567	0.483521	0.785157	1.45119	2.05219	0.712342	7.73347	10.3416	4.96374	1.90092	3.12403	1.85964	1.62799	1	4.16662	0.0163862	2.44406	1
Lacdel1|875711	Lacdel1	875711	gene_8792	Induced during mycorrhization	4 and 6 wpi	J	VI	NA	NA	NA	NA	NA	NA	NA	NA	NA	PF03188	Cytochrom_B561	NA	Other function	Cytochrome B561	OG0007931	9.4456	11.2619	8.9957	10.2628	26.0281	30.7306	278.205	218.532	365.164	301.386	184.061	209.976	1.24332	1	5.20582	1.18e-20	4.88271	1.46e-16
Lacdel1|MSTRG.2539	Lacdel1	NA	MSTRG.2539	Induced during mycorrhization	6 wpi only	C	VI	NA	NA	NA	NA	NA	NA	NA	NA	NA	NA	NA	NA	Unknown	Unknown	OG0000589	9.70076	10.1743	9.39471	15.691	24.1861	17.5157	35.8701	29.84	29.2436	71.642	77.8494	58.7345	1.1382	1	2.18385	1	3.29002	9.22e-11
Lacdel1|MSTRG.3750	Lacdel1	NA	MSTRG.3750	Induced during mycorrhization	4 and 6 wpi	H	VI	NA	NA	NA	NA	NA	NA	NA	NA	NA	PF13813	MBOAT_2	NA	Other function	Membrane bound O-acyl transferase	OG0000207	13.6401	13.021	12.6856	14.321	14.2763	14.175	2229.92	1779.72	1760.27	1390.88	899.917	1497.3	0.238872	1	7.08154	1.73e-136	6.43591	3.08e-103
Lacdel1|MSTRG.4444	Lacdel1	NA	MSTRG.4444	Induced during mycorrhization	4 and 6 wpi	E	VI	NA	NA	NA	NA	NA	NA	NA	NA	NA	NA	NA	NA			OG0010936	0.128293	0.072453	0.05149	0.094039	0.128534	0.154652	26.8851	30.1586	18.5418	6.73923	6.52175	8.84243	0.70276	1	8.62884	5.63e-31	6.8168	4.71e-16
Lacdel1|MSTRG.4474	Lacdel1	NA	MSTRG.4474	Induced during mycorrhization	6 wpi only	E	VI	NA	NA	NA	NA	NA	NA	NA	NA	NA	NA	NA	NA	Unknown	Unknown	OG0001505	1.06304	1.19693	1.06924	1.04242	0.886942	1.17661	3.60164	2.16024	2.69648	5.4868	5.99482	5.62693	-0.0933162	1	1.80158	1	2.8529	0.00226093
Lacdel1|MSTRG.5892	Lacdel1	NA	MSTRG.5892	Induced during mycorrhization	6 wpi only	E	VI	NA	NA	NA	NA	NA	NA	NA	NA	NA	NA	NA	NA	Unknown	Unknown	OG0002058	1.78846	1.77186	1.67273	1.67145	1.63259	2.32316	10.4299	9.98148	7.94065	23.9538	27.8816	13.5445	0.208343	1	2.81098	0.0719931	4.01881	4.01e-12
Lacdel1|MSTRG.6630	Lacdel1	NA	MSTRG.6630	Induced during mycorrhization	4 and 6 wpi	C	VI	NA	NA	NA	NA	NA	NA	NA	NA	NA	PF13813	MBOAT_2	NA	Other function	Membrane bound O-acyl transferase	OG0001257	1.04018	0.88207	0.890583	0.96718	0.774535	4.50146	59.6852	51.0656	56.3183	24.6292	19.9453	36.0463	1.19196	1	6.35635	1.06e-11	5.29302	1.44e-06
Lacdel1|MSTRG.6863	Lacdel1	NA	MSTRG.6863	Induced during mycorrhization	4 and 6 wpi	E	VI	NA	NA	NA	NA	NA	NA	NA	NA	NA	NA	NA	NA	Unknown	Unknown	OG0013018	0.24212	0.305012	0.378069	0.055711	0.018317	0.076357	3.74267	3.13101	4.61	3.48055	3.21332	3.89098	-3.01483	1	3.84143	0.000219164	3.60978	0.00302333
Lacdel1|MSTRG.7456	Lacdel1	NA	MSTRG.7456	Induced during mycorrhization	4 and 6 wpi	C	VI	NA	NA	NA	NA	NA	NA	NA	NA	NA	PF13649	Methyltransf_25	NA	Other function	Methyltransferase	OG0004412	2.08225	2.9617	2.95859	2.43867	3.19862	2.68208	58.8388	38.347	38.9905	38.258	17.3433	25.5726	0.147611	1	4.51345	2.43e-15	3.74189	2.86e-07
Lacdel1|MSTRG.9494	Lacdel1	NA	MSTRG.9494	Induced during mycorrhization	6 wpi only	C	VI	NA	NA	NA	NA	NA	NA	NA	NA	NA	NA	NA	NA	Unknown	Unknown	OG0006962	5.03159	5.69463	5.15152	6.71519	8.06228	6.92085	12.9446	11.1606	10.3334	21.4139	26.8173	15.3009	0.646516	1	1.90908	1	2.80055	0.00789708
Lacdel1|1406821	Lacdel1	1406821	gene_9851	Induced during mycorrhization	4 wpi only	I	II	NA	NA	NA	NA	NA	NA	NA	NA	NA	NA	NA	NA	Unknown	Unknown	OG0014971	121.193	143.917	129.78	100.36	86.6556	102.434	3358.71	1904.92	658.333	1656.41	1477.77	356.404	-0.41957	1	4.14201	0.0218258	3.39321	0.646873
Lacdel1|1462026	Lacdel1	1462026	gene_10421	Induced during mycorrhization	4 and 6 wpi	C	II	Secreted	NA	NA	NA	NA	NA	NA	NA	NA	NA	NA	NA	Unknown	Unknown	OG0010368	6.37393	7.72685	5.70391	6.61191	8.73649	6.43446	53.0577	59.4677	74.2243	71.6457	61.7685	66.067	0.200424	1	3.40638	4.44e-13	3.48622	1.49e-14
Lacdel1|1537327	Lacdel1	1537327	gene_10774	Induced during mycorrhization	4 and 6 wpi	E	II	NA	NA	NA	NA	NA	NA	NA	NA	NA	NA	NA	NA	Unknown	Unknown	OG0011436	0	0	0	0.514523	0.383582	0	4.5718	3.52005	0.688167	0.556827	2.56969	1.96616	4.05201	1	7.31047	0.00340485	6.48272	0.0372465
Lacdel1|1652471	Lacdel1	1652471	gene_13180	Induced during mycorrhization	6 wpi only	J	II	NA	NA	NA	NA	NA	NA	NA	NA	NA	NA	NA	NA	Unknown	Unknown	OG0008777	26.9127	30.7423	26.2012	35.0234	34.8759	36.1838	91.4621	98.521	106.73	115.888	99.8601	159.3	0.538032	1	2.30883	1	2.60979	0.00430766
Lacdel1|2314477	Lacdel1	2314477	gene_8422	Induced during mycorrhization	6 wpi only	E	II	NA	NA	NA	NA	NA	NA	NA	NA	NA	NA	NA	NA	Unknown	Unknown	OG0000836	2.92333	5.8104	4.01601	3.02083	2.64602	3.30314	11.9968	13.5062	15.501	20.6678	39.2713	31.7644	-0.539048	1	2.32175	1	3.47296	1.15e-05
Lacdel1|2314641	Lacdel1	2314641	gene_6671	Induced during mycorrhization	4 wpi only	C	II	NA	NA	NA	NA	NA	NA	NA	NA	NA	NA	NA	NA	Unknown	Unknown	OG0007961	8.01362	11.5918	13.4549	15.1289	16.6998	24.7366	81.945	49.2708	53.4855	35.2339	33.2574	38.8681	0.914356	1	2.89707	0.0291683	2.09865	1
Lacdel1|2316526	Lacdel1	2316526	gene_8477	Induced during mycorrhization	4 wpi only	E	II	SSP	NA	NA	NA	NA	NA	NA	NA	NA	NA	NA	NA	Unknown	Unknown	OG0009769	1.52901	3.09195	0.947983	1.05141	1.92521	2.46781	24.7218	15.6999	11.0935	11.0787	11.3788	6.43798	0.338949	1	3.75539	0.00304649	2.80226	1
Lacdel1|2317891	Lacdel1	2317891	gene_10745	Induced during mycorrhization	4 and 6 wpi	J	II	NA	NA	NA	NA	NA	NA	NA	NA	NA	NA	NA	NA	Unknown	Unknown	OG0011809	10.8974	20.8945	11.5589	15.1484	14.8827	16.9362	741.598	404.116	471.082	368.774	255.087	199.28	0.192852	1	5.36818	2.87e-26	4.37397	6.48e-13
Lacdel1|2318382	Lacdel1	2318382	gene_13206	Induced during mycorrhization	4 and 6 wpi	C	II	NA	NA	NA	NA	NA	NA	NA	NA	NA	NA	NA	NA	Unknown	Unknown	OG0012265	1.1823	2.14465	1.98131	1.6653	2.35862	2.64793	23.1376	29.974	28.8173	44.2757	28.6904	27.8666	0.538252	1	4.29467	1.41e-11	4.55215	2.5e-14
Lacdel1|2332869	Lacdel1	2332869	gene_39	Induced during mycorrhization	4 and 6 wpi	B	II	NA	NA	NA	NA	NA	NA	NA	NA	NA	NA	NA	NA	Unknown	Unknown	OG0015563	10.1116	7.38241	8.82273	5.97246	6.04749	7.39745	281.629	332.764	276.041	70.3944	104.957	203.216	-0.430685	1	5.21194	3.53e-22	4.03834	9.06e-09
Lacdel1|2339380	Lacdel1	2339380	gene_3047	Induced during mycorrhization	4 wpi only	C	II	NA	NA	NA	NA	NA	NA	NA	NA	NA	NA	NA	NA	Unknown	Unknown	OG0003702	3.40056	4.85472	2.98124	2.93127	4.62157	4.27803	71.3982	74.7982	35.7436	19.0144	54.3577	25.0661	-0.0626386	1	3.70576	0.000139701	2.905	0.371348
Lacdel1|2368090	Lacdel1	2368090	gene_7251	Induced during mycorrhization	4 wpi only	C	II	NA	NA	NA	NA	NA	NA	NA	NA	NA	NA	NA	NA	Unknown	Unknown	OG0002204	9.96451	10.6737	11.9996	5.0373	5.92405	4.49376	82.1597	93.1339	65.4203	36.4216	66.8558	47.2502	-0.988074	1	3.0923	1.09e-05	2.4047	1
Lacdel1|2391700	Lacdel1	2391700	gene_10270	Induced during mycorrhization	4 wpi only	C	II	NA	NA	NA	NA	NA	NA	NA	NA	NA	NA	NA	NA	Unknown	Unknown	OG0009721	8.50478	7.94667	8.95114	6.42648	9.50969	8.92565	85.2356	58.7888	60.4643	51.2682	51.3391	28.9529	0.145562	1	3.3646	1.53e-05	2.74091	0.166607
Lacdel1|2397331	Lacdel1	2397331	gene_9565	Induced during mycorrhization	6 wpi only	E	II	SSP	NA	NA	NA	NA	NA	NA	NA	NA	NA	NA	NA	Unknown	Unknown	OG0001444	0.348645	0.532168	0.638415	0	1.00004	0.437609	4.41149	2.70713	3.69948	9.71342	7.15667	6.78601	0.14823	1	3.18788	0.439632	4.33077	0.000122014
Lacdel1|2397837	Lacdel1	2397837	gene_9631	Induced during mycorrhization	4 wpi only	C	II	NA	NA	NA	NA	NA	NA	NA	NA	NA	NA	NA	NA	Unknown	Unknown	OG0012527	9.31707	11.3708	7.47644	17.6719	10.4518	13.5583	89.5411	73.4002	39.2074	75.6656	46.2992	32.8453	0.751995	1	3.29412	0.00780193	2.86397	0.376121
Lacdel1|2411457	Lacdel1	2411457	gene_13205	Induced during mycorrhization	4 and 6 wpi	B	II	NA	NA	NA	NA	NA	NA	NA	NA	NA	NA	NA	NA	Unknown	Unknown	OG0000828	5.98811	5.28479	3.80457	7.33357	7.21034	8.36873	105.86	95.7744	105.405	147.384	98.3583	95.3167	0.649334	1	4.84318	4.32e-20	4.91088	5.31e-21
Lacdel1|2417400	Lacdel1	2417400	gene_11885	Induced during mycorrhization	4 and 6 wpi	B	II	SSP	NA	NA	NA	NA	NA	NA	NA	NA	NA	NA	NA	Unknown	Unknown	OG0009123	1.85747	2.34552	5.22566	5.30485	11.7052	4.57653	318.944	169.514	187.686	171.68	72.4668	83.401	1.25534	1	6.48668	5.83e-14	5.41655	5.42e-08
Lacdel1|2511896	Lacdel1	2511896	gene_1217	Induced during mycorrhization	4 and 6 wpi	B	II	NA	NA	NA	NA	NA	NA	NA	NA	NA	NA	NA	NA	Unknown	Unknown	OG0002367	4.06383	6.75246	12.2914	5.86223	4.45996	17.2399	211.73	118.018	100.971	140.112	91.3921	122.996	0.404831	1	4.48066	0.000248957	4.12691	0.00419052
Lacdel1|2516377	Lacdel1	2516377	gene_6044	Induced during mycorrhization	6 wpi only	J	II	NA	NA	NA	NA	NA	NA	NA	NA	NA	NA	NA	NA	Unknown	Unknown	OG0010032	33.7696	72.0453	73.1386	23.4774	16.2403	31.1113	181.385	160.394	159.978	567.005	560.927	599.51	-1.21826	1	1.96592	1	3.69537	5.97e-09
Lacdel1|2520485	Lacdel1	2520485	gene_11411	Induced during mycorrhization	4 wpi only	B	II	NA	NA	NA	NA	20c3__4Q56 H-type lectin	NA	NA	NA	NA	PF09458	H_lectin	NA	Lectin	H-type lectin	OG0000228	8.77634	6.50757	6.66172	7.97153	10.1712	8.42848	341.249	113.47	33.5676	49.0643	130.655	25.159	0.442626	1	5.1045	0.00482029	3.69636	0.853645
Lacdel1|2522272	Lacdel1	2522272	gene_10350	Induced during mycorrhization	4 and 6 wpi	I	II	NA	NA	NA	NA	NA	NA	NA	NA	NA	NA	NA	NA	Unknown	Unknown	OG0001054	38.2265	40.0072	36.948	36.2799	42.3455	45.2721	149.406	1415.63	5729.2	890.826	93.1994	4959.18	0.23068	1	6.35067	0.0117964	6.02947	0.0335765
Lacdel1|2522306	Lacdel1	2522306	gene_10390	Induced during mycorrhization	4 and 6 wpi	H	II	SSP	NA	NA	NA	NA	NA	NA	NA	NA	NA	NA	NA	Unknown	Unknown	OG0005769	0	0	0.800136	0.593859	0.505588	1.4653	7364.83	3848.29	5416.4	4071.4	2535.78	2668.31	1.59985	1	14.4106	1.55e-42	13.5207	2.14e-36
Lacdel1|2523534	Lacdel1	2523534	gene_12957	Induced during mycorrhization	4 wpi only	C	II	NA	NA	NA	NA	NA	NA	NA	NA	NA	NA	NA	NA	Unknown	Unknown	OG0015978	0.664566	0	0.512669	0.308574	2.13718	1.94705	55.994	34.671	18.5325	11.9407	5.47965	5.88168	1.63879	1	6.31079	2.46e-08	4.06728	0.102816
Lacdel1|2523625	Lacdel1	2523625	gene_10737	Induced during mycorrhization	4 and 6 wpi	J	II	NA	NA	CBM50-CBM50	NA	NA	NA	NA	NA	NA	PF01476	LysM	NA	Other function	LysM	OG0012701	9.30336	11.9824	11.4475	7.27387	11.6588	12.6246	118.025	104.025	169.652	93.7835	65.6939	69.4395	0.0340172	1	3.7984	3.06e-10	3.00719	0.00461326
Lacdel1|2523629	Lacdel1	2523629	gene_10740	Induced during mycorrhization	4 wpi only	C	II	SSP	NA	NA	NA	NA	NA	NA	NA	NA	PF01476	LysM	NA	Other function	LysM	OG0010826	5.41593	5.51163	3.81266	8.59481	8.48872	5.40693	26.1698	24.6628	45.5127	25.0238	20.7171	25.7838	0.552632	1	2.8721	0.0490104	2.42208	1
Lacdel1|2523902	Lacdel1	2523902	gene_10908	Induced during mycorrhization	4 and 6 wpi	C	II	NA	NA	NA	NA	NA	NA	NA	NA	NA	NA	NA	NA	Unknown	Unknown	OG0002149	1.56546	2.83925	1.22465	2.13648	3.68207	12.1925	63.3944	32.9939	32.3536	20.3544	18.845	24.6517	1.51189	1	4.53662	3.2e-06	3.5351	0.0394108
Lacdel1|2524343	Lacdel1	2524343	gene_13210	Induced during mycorrhization	6 wpi only	E	II	NA	NA	NA	NA	NA	NA	NA	NA	NA	NA	NA	NA	Unknown	Unknown	OG0000828	1.58164	0.63309	1.10439	1.3453	0	1.84799	11.5864	6.35652	6.22434	9.57182	11.3525	26.3276	0.283766	1	3.27183	0.688137	4.10582	0.0122484
Lacdel1|2525323	Lacdel1	2525323	gene_11865	Induced during mycorrhization	4 wpi only	E	II	SSP	NA	NA	NA	NA	NA	NA	NA	NA	NA	NA	NA	Unknown	Unknown	OG0010832	1.34446	1.63822	2.12179	1.10477	0.781221	0.502793	15.5177	10.3522	16.0136	9.57096	9.06796	4.60226	-0.704371	1	3.41395	0.00447315	2.64343	1
Lacdel1|2532877	Lacdel1	2532877	gene_20281	Induced during mycorrhization	6 wpi only	J	II	NA	NA	NA	NA	NA	NA	NA	NA	NA	NA	NA	NA	Unknown	Unknown	OG0001862	18.9761	21.5959	25.7381	97.8458	249.535	289.905	35.7587	24.2597	17.7289	244.54	198.531	145.7	3.56258	0.0418588	0.805169	1	3.75539	5.95e-05
Lacdel1|2533898	Lacdel1	2533898	gene_19898	Induced during mycorrhization	4 and 6 wpi	C	II	NA	NA	NA	NA	NA	NA	NA	NA	NA	NA	NA	NA	Unknown	Unknown	OG0016046	3.26859	2.90098	3.9296	7.99948	6.22806	5.03286	50.779	49.8811	53.9057	53.1594	40.9221	39.8626	1.15665	1	4.47512	2.89e-22	4.24195	4.59e-18
Lacdel1|2554067	Lacdel1	2554067	gene_10906	Induced during mycorrhization	4 and 6 wpi	B	II	NA	NA	NA	NA	NA	NA	NA	NA	NA	NA	NA	NA	Unknown	Unknown	OG0002149	1.7345	2.30616	3.88539	1.70078	5.89926	1.51591	340.247	580.267	758.581	305.496	74.7714	765.894	0.0571754	1	7.70871	6.47e-12	7.19222	9.17e-10
Lacdel1|288082	Lacdel1	288082	gene_16297	Induced during mycorrhization	4 and 6 wpi	C	II	NA	NA	NA	NA	20c3__4Q56 H-type lectin	NA	NA	NA	NA	PF09458	H_lectin	NA	Lectin	H-type lectin	OG0000228	0.707213	0.33441	0.518843	0.628816	0.382784	1.11715	40.6638	20.6407	11.9114	14.0535	21.3971	9.33636	0.235965	1	5.86455	1.26e-07	5.11057	7.62e-05
Lacdel1|5567	Lacdel1	5567	gene_941	Induced during mycorrhization	4 and 6 wpi	B	II	NA	NA	NA	NA	NA	NA	NA	NA	NA	NA	NA	NA	Unknown	Unknown	OG0000452	0.795498	0.940209	1.39024	1.02317	7.73386	1.46683	722.128	387.728	554.941	312.344	209.824	166.959	1.81961	1	9.33869	5.91e-28	8.044	8.22e-19
Lacdel1|732187	Lacdel1	732187	gene_9088	Induced during mycorrhization	4 and 6 wpi	C	II	NA	NA	NA	NA	NA	NA	NA	NA	NA	NA	NA	NA	Unknown	Unknown	OG0002969	9.69485	9.73129	8.69377	5.57223	8.98926	14.6176	96.0734	58.9078	50.2525	75.963	82.545	63.6623	0.441104	1	3.59931	7.69e-05	3.66349	3.49e-05
Lacdel1|MSTRG.1231	Lacdel1	NA	MSTRG.1231	Induced during mycorrhization	4 wpi only	E	II	NA	NA	NA	NA	NA	NA	NA	NA	NA	NA	NA	NA	Unknown	Unknown	OG0009038	0.961045	0.846697	0.603743	1.24098	0.545022	0.638215	5.30377	4.14871	4.49038	2.59659	2.24182	2.29764	-0.416887	1	3.4688	0.0179447	2.41349	1
Lacdel1|MSTRG.3357	Lacdel1	NA	MSTRG.3357	Induced during mycorrhization	4 wpi only	C	II	NA	NA	NA	NA	NA	NA	NA	NA	NA	NA	NA	NA	Other function	A28 related	OG0004508	3.25481	4.07706	3.67804	2.94911	3.70556	3.38982	28.2547	53.5581	54.1532	4.53696	9.08127	25.0762	-0.00521794	1	4.0434	0.00340485	2.1779	1
Lacdel1|MSTRG.3533	Lacdel1	NA	MSTRG.3533	Induced during mycorrhization	4 and 6 wpi	C	II	NA	116208038|GX|abH09	NA	NA	NA	NA	NA	NA	NA	PF00023,PF12796,PF13606,PF13637,PF13857	Ank,Ank_2,Ank_3,Ank_4,Ank_5	NA	Unknown	Inconsistent annotation	OG0016494	1.62107	2.03074	1.85631	3.00402	3.24073	3.293	29.7099	17.9113	18.9648	14.9381	10.7184	14.2891	0.936619	1	4.01044	2.25e-13	3.22964	7.52e-05
Lacdel1|MSTRG.5087	Lacdel1	NA	MSTRG.5087	Induced during mycorrhization	6 wpi only	C	II	NA	NA	NA	NA	NA	NA	NA	NA	NA	NA	NA	NA	Unknown	Unknown	OG0005765	3.28781	0	7.7254	12.9984	3.6766	10.7824	61.4733	39.4369	51.8548	0	279.486	0	0.402287	1	3.15303	0.618883	5.4168	7.48e-09
Lacdel1|MSTRG.7574	Lacdel1	NA	MSTRG.7574	Induced during mycorrhization	4 wpi only	E	II	NA	NA	NA	NA	NA	NA	NA	NA	NA	NA	NA	NA	Unknown	Unknown	OG0016641	1.95925	1.80077	1.68024	2.5315	2.91674	2.50323	16.2504	13.3254	14.9951	8.76614	6.39751	9.42224	0.709758	1	2.67774	0.0015465	1.882	1
Lacdel1|1481472	Lacdel1	1481472	gene_11334	Induced during mycorrhization	4 wpi only	C	I	SSP	NA	NA	NA	NA	NA	NA	NA	NA	NA	NA	NA	Unknown	Unknown	OG0011588	1.83796	2.34186	0.835696	1.87517	2.27887	8.33543	94.8562	35.5809	51.1362	17.0163	7.62059	11.9046	1.19797	1	5.38866	9.23e-06	3.00402	1
Lacdel1|1807497	Lacdel1	1807497	gene_5424	Induced during mycorrhization	4 wpi only	C	I	NA	NA	NA	NA	NA	NA	NA	NA	NA	NA	NA	NA	Unknown	Unknown	OG0015067	3.72594	5.29839	3.92631	4.08156	4.49677	7.40449	23.9601	30.7721	39.886	16.1909	13.7461	31.5254	0.469634	1	3.32102	0.00123826	2.73083	0.541473
Lacdel1|2309806	Lacdel1	2309806	gene_1569	Induced during mycorrhization	4 and 6 wpi	C	I	NA	NA	NA	NA	NA	NA	NA	NA	NA	NA	NA	NA	Unknown	Unknown	OG0015234	2.66476	2.1749	2.22091	2.05276	3.06138	3.50941	12.2838	13.8151	12.8944	19.7275	15.8976	17.5307	0.425002	1	2.75094	0.0234203	3.25563	7.45e-07
Lacdel1|2316307	Lacdel1	2316307	gene_13304	Induced during mycorrhization	4 wpi only	E	I	NA	NA	NA	NA	NA	NA	NA	NA	NA	NA	NA	NA	Unknown	Unknown	OG0015356	1.06356	1.23673	0.724409	1.53727	1.91983	2.07011	11.6497	13.3157	11.9904	5.67145	4.86736	8.41491	1.09208	1	4.15516	1.25e-06	3.24872	0.0520166
Lacdel1|2318044	Lacdel1	2318044	gene_11695	Induced during mycorrhization	4 wpi only	E	I	NA	NA	NA	NA	NA	NA	NA	NA	NA	NA	NA	NA	Unknown	Unknown	OG0012342	0.267269	0.449166	0.300849	0.228466	0.437253	0.299594	3.1228	2.88234	2.68247	1.95876	1.19707	1.75187	0.447308	1	3.49668	0.0209241	2.50333	1
Lacdel1|2332414	Lacdel1	2332414	gene_1602	Induced during mycorrhization	4 and 6 wpi	C	I	NA	NA	NA	NA	NA	NA	NA	NA	NA	NA	NA	NA	Unknown	Unknown	OG0015562	0	0	0	0	0.348188	0	63.3474	53.5016	41.0821	12.5353	10.6238	11.2198	1.34373	1	10.5555	6.84e-11	8.42414	5.37e-06
Lacdel1|2332956	Lacdel1	2332956	gene_54	Induced during mycorrhization	4 and 6 wpi	C	I	SSP	NA	NA	NA	NA	NA	NA	NA	NA	NA	NA	NA	Unknown	Unknown	OG0015564	2.76834	1.08089	1.8071	2.97088	2.5056	0	75.9144	120.281	86.1736	17.8421	20.8337	27.8431	0.0333235	1	6.61006	4.96e-32	4.41873	2.25e-08
Lacdel1|2386845	Lacdel1	2386845	gene_10044	Induced during mycorrhization	4 wpi only	C	I	NA	NA	NA	NA	NA	NA	NA	NA	NA	NA	NA	NA	Unknown	Unknown	OG0015675	7.05971	7.86091	6.53093	11.3748	13.687	6.5464	58.7048	43.7007	49.9403	51.638	24.7087	34.63	0.568971	1	3.19152	0.00192727	2.72751	0.377644
Lacdel1|2421884	Lacdel1	2421884	gene_13811	Induced during mycorrhization	4 wpi only	E	I	NA	NA	NA	NA	NA	NA	NA	NA	NA	NA	NA	NA	Unknown	Unknown	OG0015783	0.160304	0.583499	0.393708	0.250034	0.358108	0.294266	6.27935	4.00894	3.14391	3.25447	3.72469	1.28463	0.19156	1	4.26478	0.0367609	3.66745	0.470458
Lacdel1|2439815	Lacdel1	2439815	gene_15492	Induced during mycorrhization	4 and 6 wpi	E	I	SSP	NA	NA	NA	NA	NA	NA	NA	NA	NA	NA	NA	Unknown	Unknown	OG0015815	0	0.329859	0	0	0	0	5.28597	4.46144	3.27963	4.94088	3.11137	3.96522	-0.579857	1	6.95019	0.00253459	6.69139	0.00655893
Lacdel1|2459474	Lacdel1	2459474	gene_18931	Induced during mycorrhization	4 wpi only	C	I	NA	NA	NA	NA	NA	NA	NA	NA	NA	NA	NA	NA	Unknown	Unknown	OG0010685	4.6637	5.8435	4.9303	2.99028	3.61415	12.8961	117.364	49.1351	46.3094	22.5964	16.5371	18.7976	0.231855	1	3.67618	0.00519133	1.86272	1
Lacdel1|2461927	Lacdel1	2461927	gene_16955	Induced during mycorrhization	6 wpi only	E	I	NA	NA	NA	NA	NA	NA	NA	NA	NA	NA	NA	NA	Unknown	Unknown	OG0010761	1.73344	0.954685	1.10527	1.679	1.2391	2.11657	5.45382	4.39604	6.18392	12.6927	5.80724	11.6655	0.460411	1	2.55681	1	3.44881	0.0100811
Lacdel1|2523620	Lacdel1	2523620	gene_10730	Induced during mycorrhization	4 and 6 wpi	C	I	NA	NA	NA	NA	NA	NA	NA	NA	NA	NA	NA	NA	Unknown	Unknown	OG0015980	0.23513	0.926043	0.992609	1.32154	2.5279	9.82977	67.159	47.3451	41.7435	23.644	16.8443	18.0037	3.13409	1	6.65807	2.25e-08	5.12776	0.00119651
Lacdel1|2551970	Lacdel1	2551970	gene_7476	Induced during mycorrhization	4 and 6 wpi	J	I	SSP	NA	NA	NA	NA	NA	NA	NA	NA	NA	NA	NA	Unknown	Unknown	OG0012780	9.39376	10.4694	9.32285	16.4696	27.109	31.2337	327.855	278.187	242.963	332.225	240.6	218.634	1.43514	1	5.02908	3.14e-35	4.88991	8.14e-32
Lacdel1|2577586	Lacdel1	2577586	gene_6336	Induced during mycorrhization	4 wpi only	E	I	NA	NA	NA	NA	NA	NA	NA	NA	NA	NA	NA	NA	Unknown	Unknown	OG0016150	0.22038	0.184345	0.108597	0.237995	0	0.177407	3.12896	3.13192	5.67848	2.37573	1.13515	1.46712	-0.348475	1	5.13452	0.00117482	3.97623	0.275394
Lacdel1|2680014	Lacdel1	2680014	gene_15493	Induced during mycorrhization	4 wpi only	E	I	NA	NA	NA	NA	NA	NA	NA	NA	NA	NA	NA	NA	Unknown	Unknown	OG0000430	0.262106	0.661467	0.792259	0.740475	0.642746	1.23396	6.96803	6.17557	4.10033	3.42136	3.8045	2.51262	0.791172	1	4.07666	0.00192265	3.38698	0.224621
Lacdel1|761239	Lacdel1	761239	gene_9279	Induced during mycorrhization	4 wpi only	B	I	NA	NA	NA	NA	NA	NA	NA	NA	NA	NA	NA	NA	Unknown	Unknown	OG0012914	7.54144	9.19551	8.00434	11.6937	11.7329	14.3806	404.773	193.427	51.945	174.599	161.655	29.7584	0.789373	1	5.31783	0.000838477	4.47627	0.0503239
Lacdel1|MSTRG.10459	Lacdel1	NA	MSTRG.10459	Induced during mycorrhization	4 and 6 wpi	E	I	NA	NA	NA	NA	NA	NA	NA	NA	NA	NA	NA	NA	Unknown	Unknown	OG0016417	0.358414	0.838217	0.478469	0.453902	0.365566	0	38.3132	0	18.539	22.6146	8.03899	12.5788	-0.611668	1	6.20005	3.55e-09	5.21027	3.33e-05
Lacdel1|MSTRG.2133	Lacdel1	NA	MSTRG.2133	Induced during mycorrhization	6 wpi only	E	I	NA	NA	NA	NA	NA	NA	NA	NA	NA	NA	NA	NA	Unknown	Unknown	OG0016460	1.485	1.54528	1.23553	0.886724	1.00076	0.950547	4.48592	4.13074	4.57387	6.04412	6.19066	5.1449	-0.455479	1	2.10238	1	2.47222	0.0485623
Lacdel1|MSTRG.5597	Lacdel1	NA	MSTRG.5597	Induced during mycorrhization	4 and 6 wpi	E	I	NA	NA	NA	NA	NA	NA	NA	NA	NA	NA	NA	NA	Other function	A28 related	OG0000615	0.263143	0.092077	0.125258	0	0.041731	0	2.84621	1.49907	1.61354	0	1.97882	2.12842	-3.32029	1	4.09727	0.00387136	4.53771	0.000122077
Lacdel1|MSTRG.5893	Lacdel1	NA	MSTRG.5893	Induced during mycorrhization	4 and 6 wpi	C	I	NA	NA	NA	NA	NA	NA	NA	NA	NA	NA	NA	NA	Unknown	Unknown	OG0002058	3.29839	5.19546	3.93827	3.15571	2.10453	3.01859	22.3462	24.4851	21.858	31.4467	27.8774	26.9795	-0.404065	1	2.87304	8.27e-05	3.19824	4.06e-09
Lacdel1|MSTRG.677	Lacdel1	NA	MSTRG.677	Induced during mycorrhization	4 wpi only	E	I	NA	NA	NA	NA	NA	NA	NA	NA	NA	NA	NA	NA	Unknown	Unknown	OG0016591	1.30174	1.30549	1.60287	1.22766	1.0033	1.3434	8.65203	11.5908	5.89871	1.69045	2.57626	2.07001	-0.16265	1	2.97761	0.0197763	0.937501	1
Lacdel1|MSTRG.6965	Lacdel1	NA	MSTRG.6965	Induced during mycorrhization	4 and 6 wpi	E	I	NA	NA	NA	NA	NA	NA	NA	NA	NA	NA	NA	NA	Unknown	Unknown	OG0016598	0.520427	0.380444	0.397878	0.101287	0.316209	0.232307	10.4077	6.06698	7.40285	10.2719	9.70736	14.9841	-0.963169	1	4.70668	3.55e-13	5.22947	8.37e-19
Lacdel1|MSTRG.737	Lacdel1	NA	MSTRG.737	Induced during mycorrhization	4 and 6 wpi	E	I	NA	NA	NA	NA	NA	NA	NA	NA	NA	NA	NA	NA	Unknown	Unknown	OG0016623	1.82259	2.08332	1.46618	1.33962	1.55436	1.53863	21.2282	14.0289	13.8642	29.6305	26.5495	20.8279	-0.166868	1	3.6061	3.39e-10	4.23763	8.68e-20
Lacdel1|MSTRG.8395	Lacdel1	NA	MSTRG.8395	Induced during mycorrhization	4 and 6 wpi	H	I	NA	NA	NA	NA	NA	NA	NA	NA	NA	NA	NA	NA	Unknown	Unknown	OG0016672	0.215481	0	0.68691	2.28853	8.60031	1.58051	28568.7	21925.1	20447	14265.9	10701.4	14450.2	4.04023	1	16.7248	4.37e-74	15.775	1.26e-64
Lacdel1|MSTRG.9662	Lacdel1	NA	MSTRG.9662	Induced during mycorrhization	4 wpi only	E	I	NA	NA	NA	NA	NA	NA	NA	NA	NA	NA	NA	NA	Unknown	Unknown	OG0016706	0.183955	0.444775	0.284935	0.521843	0.341011	0.104296	4.76402	2.50856	3.3925	1.78833	1.07239	1.71709	0.583361	1	4.12048	0.04619	2.85521	1
Lacdel1|1542286	Lacdel1	1542286	gene_10863	Induced during mycorrhization	4 and 6 wpi	C	V	SSP	NA	NA	NA	NA	NA	NA	3.4.24.-	Metalloendopeptidases.	PF07504	FTP	NA	Protease	Fungalysin (M36)	OG0001061	2.54716	2.37853	1.68207	1.73492	1.69528	2.0331	148.98	122.301	125.524	123.929	71.2052	72.8132	-0.0780923	1	6.26198	1.3e-51	5.66964	6.25e-38
Lacdel1|2224044	Lacdel1	2224044	gene_7652	Induced during mycorrhization	4 wpi only	C	V	Secreted	NA	NA	NA	NA	NA	NA	NA	NA	PF12222	PNGaseA	NA	Other function	PNGaseA	OG0000024	7.76907	9.74944	8.22764	9.20147	8.17599	10.2022	43.2028	63.8315	85.2948	30.9761	22.8843	68.146	0.188973	1	3.21384	0.00597962	2.5052	1
Lacdel1|2229888	Lacdel1	2229888	gene_13806	Induced during mycorrhization	4 and 6 wpi	J	V	Secreted	NA	NA	NA	NA	NA	NA	3.4.24.-	Metalloendopeptidases.	PF02128	Peptidase_M36	NA	Protease	Fungalysin (M36)	OG0000402	13.2715	14.16	11.3847	11.3027	9.7169	10.5784	166.068	149.083	105.297	88.5057	57.5881	64.8392	-0.156564	1	3.77804	3.52e-14	2.76259	0.0177532
Lacdel1|2229892	Lacdel1	2229892	gene_13821	Induced during mycorrhization	4 and 6 wpi	E	V	Secreted	NA	NA	NA	NA	NA	NA	3.4.24.-	Metalloendopeptidases.	PF02128,PF07504	Peptidase_M36,FTP	NA	Protease	Fungalysin (M36)	OG0002152	0.330928	0.414052	0.296914	0.300209	0.265055	0.355472	19.8544	17.7904	14.5265	20.3415	6.91345	4.92226	-0.132688	1	5.94555	4.77e-12	5.2773	3.64e-08
Lacdel1|2229991	Lacdel1	2229991	gene_16924	Induced during mycorrhization	6 wpi only	C	V	NA	NA	NA	NA	NA	NA	NA	NA	NA	PF00248	Aldo_ket_red	Energy production and conversion	Other function	Aldo/keto reductase	OG0003644	8.5881	12.0276	9.0059	8.41118	9.20279	11.0523	65.9559	39.4862	42.9076	163.982	75.7545	81.3566	0.103991	1	2.77348	0.391505	3.85417	6.46e-07
Lacdel1|2235328	Lacdel1	2235328	gene_18739	Induced during mycorrhization	4 and 6 wpi	C	V	Secreted	NA	NA	NA	NA	NA	NA	NA	NA	PF12222	PNGaseA	NA	Other function	PNGaseA	OG0000024	1.91206	2.07514	1.70304	2.3245	1.62413	1.62497	28.7019	30.8473	38.4335	27.2505	18.1065	24.5782	0.213362	1	4.89263	7.68e-17	4.36779	4.5e-11
Lacdel1|2264295	Lacdel1	2264295	gene_7655	Induced during mycorrhization	4 and 6 wpi	C	V	Secreted	NA	NA	NA	NA	NA	NA	NA	NA	PF12222	PNGaseA	NA	Other function	PNGaseA	OG0000024	2.58085	2.98438	2.43269	2.95994	2.53722	1.85148	29.7521	36.6343	38.8961	25.5104	19.3147	29.5472	-0.0627448	1	3.92654	1.46e-14	3.42755	8.63e-08
Lacdel1|2273640	Lacdel1	2273640	gene_18741	Induced during mycorrhization	4 and 6 wpi	C	V	Secreted	NA	NA	NA	NA	NA	NA	NA	NA	PF12222	PNGaseA	NA	Other function	PNGaseA	OG0000024	3.16261	3.62012	3.16835	2.74329	2.99535	3.68996	24.1754	31.05	37.5555	18.691	14.3138	50.0784	-0.0179929	1	3.67788	0.000414091	3.55988	0.00174505
Lacdel1|2294657	Lacdel1	2294657	gene_11103	Induced during mycorrhization	4 and 6 wpi	C	V	Secreted	NA	NA	NA	NA	NA	NA	NA	NA	PF12222	PNGaseA	NA	Other function	PNGaseA	OG0000024	3.62384	3.33941	4.19561	1.24069	2.34281	1.12795	83.6011	55.4479	75.0185	39.6981	24.2994	43.8704	-1.22294	1	4.59927	3.13e-18	3.61055	7.64e-07
Lacdel1|2320232	Lacdel1	2320232	gene_15316	Induced during mycorrhization	4 and 6 wpi	C	V	SSP	NA	NA	NA	NA	NA	NA	NA	NA	NA	NA	NA	Unknown	Unknown	OG0010425	0.467819	0.533833	1.3269	0	0.372169	0	67.7249	53.8976	61.0224	59.8765	35.5061	44.1433	-2.1009	1	7.05898	2.47e-13	6.66298	3.14e-11
Lacdel1|2350245	Lacdel1	2350245	gene_2151	Induced during mycorrhization	6 wpi only	C	V	SSP	NA	NA	NA	NA	NA	NA	NA	NA	PF05572	Peptidase_M43	NA	Protease	Cytophagalysin (M43)	OG0006185	6.19911	6.59762	5.81102	5.32773	5.15572	6.73254	37.5077	23.6404	30.4909	60.8174	30.0701	33.7543	0.0480535	1	2.76331	0.212197	3.17237	0.00228856
Lacdel1|236571	Lacdel1	236571	gene_15489	Induced during mycorrhization	4 and 6 wpi	C	V	NA	NA	NA	NA	NA	NA	NA	NA	NA	PF00561	Abhydrolase_1	NA	Other function	Abhydrolase	OG0003638	3.32507	2.45723	3.1907	2.67906	3.43637	3.2853	41.5078	50.1528	53.9846	61.2805	43.1473	26.2328	0.159349	1	4.29631	3.07e-14	4.1526	1.92e-12
Lacdel1|2513993	Lacdel1	2513993	gene_2559	Induced during mycorrhization	6 wpi only	J	V	NA	NA	NA	NA	NA	NA	NA	3.1.3.1	Alkaline phosphatase.	PF09423,PF16655	PhoD,PhoD_N	NA	Other function	Alkaline phosphatase.	OG0007204	16.2593	25.3029	21.5963	24.5297	15.4961	18.1613	72.1786	52.3949	65.5088	139.59	159.922	145.643	0.00223988	1	1.9545	1	3.1639	1.54e-06
Lacdel1|2650607	Lacdel1	2650607	gene_5384	Induced during mycorrhization	6 wpi only	C	V	NA	NA	NA	NA	NA	NA	NA	NA	NA	PF00248	Aldo_ket_red	Energy production and conversion	Other function	Aldo/keto reductase	OG0003644	10.4698	14.3204	9.7492	8.05948	10.2971	13.5169	62.3474	36.7169	37.5795	156.995	71.4748	73.7389	0.116968	1	2.47861	1	3.57251	0.000249945
Lacdel1|2674986	Lacdel1	2674986	gene_9096	Induced during mycorrhization	6 wpi only	J	V	NA	NA	NA	NA	NA	NA	NA	1.14.11.13	Gibberellin 2-beta-dioxygenase.	PF14226,PF03171	DIOX_N,2OG-FeII_Oxy	General function prediction only ; Secondary metabolites biosynthesis, transport and catabolism	Other function	Gibberellin 2-beta-dioxygenase.	OG0012852	40.8262	50.8768	43.1193	54.5963	59.2561	46.207	64.7763	120.429	211.433	457.672	453.018	401.379	0.334782	1	1.88203	1	3.61608	3.08e-06
Lacdel1|2675353	Lacdel1	2675353	gene_7656	Induced during mycorrhization	4 and 6 wpi	C	V	Secreted	NA	NA	NA	NA	NA	NA	NA	NA	PF12222	PNGaseA	NA	Other function	PNGaseA	OG0004067	1.60396	1.596	1.33442	1.74686	2.30415	1.1117	107.429	112.939	154.206	111.409	59.4494	111.944	0.240096	1	6.67116	3.76e-53	6.24223	1.36e-43
Lacdel1|2678575	Lacdel1	2678575	gene_13810	Induced during mycorrhization	4 and 6 wpi	B	V	Secreted	NA	NA	NA	NA	NA	NA	3.4.24.-	Metalloendopeptidases.	PF02128,PF07504	Peptidase_M36,FTP	NA	Protease	Fungalysin (M36)	OG0002152	0.115631	0.108664	0.471249	0.343322	0.937884	0.53267	266.284	251.667	270.162	143.2	98.5226	146.845	1.64704	1	10.5834	6.24e-75	9.54481	1.18e-57
Lacdel1|MSTRG.2201	Lacdel1	NA	MSTRG.2201	Induced during mycorrhization	4 wpi only	C	V	NA	NA	NA	NA	NA	NA	NA	NA	NA	PF00266	Aminotran_5	NA	Other function	Aminotransferase	OG0012950	15.801	16.2498	16.3939	17.0401	17.1081	15.5267	63.2429	97.745	82.3967	47.6611	35.4182	53.7355	0.138472	1	2.79262	0.000292597	1.91079	1
Lacdel1|MSTRG.5900	Lacdel1	NA	MSTRG.5900	Induced during mycorrhization	6 wpi only	E	V	NA	NA	NA	NA	NA	NA	NA	NA	NA	PF05577	Peptidase_S28	NA	Protease	Exopeptidase family S29	OG0012177	1.57323	3.09189	1.34235	2.92619	1.32373	1.73413	6.86028	6.53106	5.29889	12.0971	24.2572	13.8043	0.337199	1	2.41386	1	3.55237	0.000701665
Lacdel1|MSTRG.7223	Lacdel1	NA	MSTRG.7223	Induced during mycorrhization	4 and 6 wpi	E	V	NA	NA	NA	NA	NA	NA	NA	NA	NA	PF02128	Peptidase_M36	NA	Protease	Fungalysin (M36)	OG0010976	0.085025	0.091973	0.055658	0.17675	0.155126	0.378547	6.79727	5.00656	4.59272	6.83865	2.16644	1.77068	1.77737	1	6.34507	1.38e-08	5.71754	3.68e-06
Lacdel1|MSTRG.10806	Lacdel1	NA	MSTRG.10806	Induced during mycorrhization	4 and 6 wpi	C	NA	NA	NA	NA	NA	NA	NA	NA	NA	NA	NA	NA	NA	Unknown	Unknown	NA	0.165775	0.079561	0.073878	0.007763	0.150974	0.01809	54.4109	29.9935	29.9451	29.3369	19.7922	17.0513	0.3799	1	9.09841	1.78e-17	8.29655	1.23e-13
Lacdel1|MSTRG.10807	Lacdel1	NA	MSTRG.10807	Induced during mycorrhization	4 wpi only	E	NA	NA	NA	NA	NA	NA	NA	NA	NA	NA	NA	NA	NA	Unknown	Unknown	NA	0.376762	0.612971	0.298583	0.163414	0.47135	0.342477	5.98136	4.7124	3.41532	2.55245	1.85627	1.9681	-0.42777	1	3.77497	6.46e-05	2.5795	1
Lacdel1|MSTRG.11974	Lacdel1	NA	MSTRG.11974	Induced during mycorrhization	4 wpi only	E	NA	NA	NA	NA	NA	NA	NA	NA	NA	NA	NA	NA	NA	Unknown	Unknown	NA	0.294704	0.211717	0	0.464972	0.345317	0	9.1751	11.6673	5.64045	5.42985	2.6568	1.44183	0.386557	1	5.9265	0.0143136	4.46529	0.710449
Lacdel1|MSTRG.2062	Lacdel1	NA	MSTRG.2062	Induced during mycorrhization	4 and 6 wpi	B	NA	NA	NA	NA	NA	NA	NA	NA	NA	NA	NA	NA	NA	Unknown	Unknown	NA	0.099898	0.21637	0.187435	0.305553	0.405808	0.417175	199.696	83.9809	255.055	231.402	230.433	196.78	1.22589	1	10.2659	1.11e-27	10.513	2.97e-29
Lacdel1|MSTRG.2131	Lacdel1	NA	MSTRG.2131	Induced during mycorrhization	4 and 6 wpi	E	NA	NA	NA	NA	NA	NA	NA	NA	NA	NA	NA	NA	NA	Unknown	Unknown	NA	0.232169	0.186518	0.154745	0.076504	0.044584	0.166265	2.76339	2.35015	2.57223	4.33566	3.23398	3.63393	-0.470166	1	4.38664	0.000585034	4.99547	2.39e-06
Lacdel1|MSTRG.2197	Lacdel1	NA	MSTRG.2197	Induced during mycorrhization	4 and 6 wpi	B	NA	NA	NA	NA	NA	NA	NA	NA	NA	NA	NA	NA	NA	Unknown	Unknown	NA	1.47401	1.26715	1.08595	1.48849	3.97293	1.71857	854.068	624.154	579.159	703.084	391.547	392.059	1.06221	1	9.54552	1.36e-93	9.06145	1.09e-81
Lacdel1|MSTRG.2202	Lacdel1	NA	MSTRG.2202	Induced during mycorrhization	4 and 6 wpi	C	NA	NA	NA	NA	NA	NA	NA	NA	NA	NA	NA	NA	NA	Unknown	Unknown	NA	0.106344	0.485296	0.090215	0.139822	1.3481	5.66859	58.7048	27.9589	17.4072	17.0278	11.4387	17.6766	3.33587	1	7.50041	1.26e-05	6.26497	0.00271371
Lacdel1|MSTRG.3284	Lacdel1	NA	MSTRG.3284	Induced during mycorrhization	6 wpi only	E	NA	NA	NA	NA	NA	NA	NA	NA	NA	NA	NA	NA	NA	Unknown	Unknown	NA	1.08206	1.7525	2.01668	1.95429	1.83946	2.44479	7.04417	4.2138	4.64359	14.634	18.1885	12.1577	0.484634	1	2.10999	1	3.57211	9.59e-06
Lacdel1|MSTRG.3729	Lacdel1	NA	MSTRG.3729	Induced during mycorrhization	6 wpi only	E	NA	NA	NA	NA	NA	NA	NA	NA	NA	NA	NA	NA	NA	Unknown	Unknown	NA	3.61519	4.37673	3.85274	3.47697	3.12196	3.4384	11.519	9.07376	6.24149	14.6544	20.802	14.9678	-0.200589	1	2.31635	1	3.14675	3.16e-05
Lacdel1|MSTRG.3751	Lacdel1	NA	MSTRG.3751	Induced during mycorrhization	4 wpi only	E	NA	NA	NA	NA	NA	NA	NA	NA	NA	NA	NA	NA	NA	Unknown	Unknown	NA	0.126425	0	0	0	0.103328	0.073075	3.56745	3.88193	1.03232	0.307	0.425323	0.283801	0.375409	1	6.08724	0.0115609	3.39388	1
Lacdel1|MSTRG.4897	Lacdel1	NA	MSTRG.4897	Induced during mycorrhization	4 wpi only	C	NA	NA	NA	NA	NA	NA	NA	NA	NA	NA	NA	NA	NA	Unknown	Unknown	NA	2.39263	1.36263	2.07799	1.5531	2.15897	2.00992	27.6912	98.2635	44.7884	5.43288	8.67791	4.21962	0.0610158	1	5.19322	3.72e-15	1.97354	1
Lacdel1|MSTRG.5008	Lacdel1	NA	MSTRG.5008	Induced during mycorrhization	4 wpi only	E	NA	NA	NA	NA	NA	NA	NA	NA	NA	NA	NA	NA	NA	Unknown	Unknown	NA	0.196438	0	0.488027	0	0	0	3.06497	3.14047	3.24262	0.789255	0.5665	0.483781	-1.47645	1	5.90843	0.0103365	3.39452	1
Lacdel1|MSTRG.5667	Lacdel1	NA	MSTRG.5667	Induced during mycorrhization	4 and 6 wpi	C	NA	NA	NA	NA	NA	NA	NA	NA	NA	NA	NA	NA	NA	Unknown	Unknown	NA	0.036051	0.181591	0.183324	0.065409	0.811992	0.272718	47.0788	41.2358	48.5234	25.2293	20.0664	20.1757	0.794418	1	6.94583	1.63e-13	5.79314	9.3e-08
Lacdel1|MSTRG.6612	Lacdel1	NA	MSTRG.6612	Induced during mycorrhization	4 wpi only	E	NA	NA	NA	NA	NA	NA	NA	NA	NA	NA	NA	NA	NA	Unknown	Unknown	NA	0.892792	0.678475	1.01063	0.285335	0.022973	0.363661	28.1995	10.2016	10.2062	10.53	3.54028	2.27518	-1.74248	1	4.64448	0.00930081	3.02707	1
Lacdel1|MSTRG.7172	Lacdel1	NA	MSTRG.7172	Induced during mycorrhization	4 wpi only	C	NA	NA	NA	NA	NA	NA	NA	NA	NA	NA	NA	NA	NA	Unknown	Unknown	NA	9.25511	9.08683	9.03299	8.26927	8.40069	8.93414	50.0874	41.9816	50.1307	39.9647	25.0248	37.9595	0.0246238	1	2.79583	0.0013755	2.30189	1
Lacdel1|MSTRG.736	Lacdel1	NA	MSTRG.736	Induced during mycorrhization	4 and 6 wpi	E	NA	NA	NA	NA	NA	NA	NA	NA	NA	NA	NA	NA	NA	Unknown	Unknown	NA	0.269881	0.411046	0.091976	0.208229	0	0	11.1319	11.7377	11.8287	6.95805	7.9129	8.10398	-2.51117	1	6.0213	8.26e-12	5.38997	3.42e-08
Lacdel1|MSTRG.7480	Lacdel1	NA	MSTRG.7480	Induced during mycorrhization	4 wpi only	C	NA	NA	NA	NA	NA	NA	NA	NA	NA	NA	NA	NA	NA	Unknown	Unknown	NA	1.24007	1.46661	1.1699	2.38154	2.36685	2.49045	26.6333	18.7934	14.4863	16.4554	18.325	12.8249	0.539235	1	3.67421	0.00228521	3.23245	0.105048
Lacdel1|MSTRG.7564	Lacdel1	NA	MSTRG.7564	Induced during mycorrhization	4 wpi only	E	NA	NA	NA	NA	NA	NA	NA	NA	NA	NA	NA	NA	NA	Unknown	Unknown	NA	0.818381	0.827569	0.7511	1.68348	1.25755	1.20051	4.0415	4.61153	5.18044	5.27078	3.50976	3.3882	1.00449	1	2.95677	0.0292839	2.74175	0.299501
Lacdel1|MSTRG.7573	Lacdel1	NA	MSTRG.7573	Induced during mycorrhization	4 and 6 wpi	E	NA	NA	NA	NA	NA	NA	NA	NA	NA	NA	NA	NA	NA	Unknown	Unknown	NA	0.423371	0.411741	0.357346	0.283823	0.39991	0.201407	5.24887	4.23983	6.65378	5.4519	5.3802	4.15227	-0.256463	1	4.09775	0.000279437	3.88816	0.00228856
Lacdel1|MSTRG.8569	Lacdel1	NA	MSTRG.8569	Induced during mycorrhization	4 and 6 wpi	E	NA	NA	NA	NA	NA	NA	NA	NA	NA	NA	NA	NA	NA	Unknown	Unknown	NA	0.420144	0.295943	1.83613	0.567698	1.13905	3.68055	14.0228	11.8592	9.9967	11.152	10.0785	12.2179	1.05041	1	3.92492	0.00792633	3.86336	0.0139953
Lacdel1|MSTRG.8695	Lacdel1	NA	MSTRG.8695	Induced during mycorrhization	4 and 6 wpi	E	NA	NA	NA	NA	NA	NA	NA	NA	NA	NA	NA	NA	NA	Unknown	Unknown	NA	0.05111	0.020039	0.063263	0.146718	0.292581	0.178892	2.9554	2.40839	2.91296	4.08136	4.27699	4.41576	3.08246	1	7.27641	0.000476492	7.91423	4.5e-05
Lacdel1|MSTRG.8806	Lacdel1	NA	MSTRG.8806	Induced during mycorrhization	4 and 6 wpi	E	NA	NA	NA	NA	NA	NA	NA	NA	NA	NA	NA	NA	NA	Unknown	Unknown	NA	0.3185	0.132886	0.194941	0.168808	0.517668	0.228856	15.9162	25.4276	30.6097	5.23859	5.57524	11.9281	0.663812	1	7.23358	8.43e-18	5.54817	5.9e-08
Lacdel1|MSTRG.8893	Lacdel1	NA	MSTRG.8893	Induced during mycorrhization	4 and 6 wpi	C	NA	NA	NA	NA	NA	NA	NA	NA	NA	NA	NA	NA	NA	Unknown	Unknown	NA	2.3547	2.02947	2.55351	2.12547	3.14359	3.03685	21.414	27.4931	24.2414	11.0988	13.0854	18.61	0.584194	1	3.84674	8.39e-10	3.05955	0.00495305

## Sheet: Sheet S3C - L.sanguifluus
Gene ID (this study)	JGI species ID	JGI protein ID	JGI gene ID	Gene regulation (genes are considered as differentially expressed if LFC > 2 or <-2 and p.value adjusted < 0.05)	Cluster in supplementary Figure S6	Secretion	Lipase	CAZyme family	CAZyme_substrate. PCW: Plant cell wall degrading enzyme.	Lectin	Subtilase family	Subtilase conservation. Subtilase missing one of their three catalytic regions were labelled as partial. If at least one of the catalytic region lack a perfect match to the pattern described in the litterature, the subtilase was labelled as containing a non-canonical region.	Enzyme Commission number	Enzyme Commission number description	PFAM domain ID	PFAM domain short description	KOG annotation	Highlighted functions	Highlighted functions additionnal details	Orthogroup ID	expression (TPM) in sample B21ct1 (FLM)	expression (TPM) in sample B21ct2 (FLM)	expression (TPM) in sample B21ct3 (FLM)	expression (TPM) in sample B21ps1 (mycorrhiza)	expression (TPM) in sample B21ps2 (mycorrhiza)	expression (TPM) in sample B21ps3 (mycorrhiza)	log2FoldChange (LFC) between FLM and mycorrhiza	adjusted p.value
Lacsan1|1010972	Lacsan1	1010972	gene_10489	Induced during mycorrhization	VII	NA	NA	NA	NA	NA	NA	NA	NA	NA	NA	NA	NA	Unknown	Unknown	OG0000271	0.867232	0.692609	1.13046	5.11939	4.02419	5.86129	3.01303	0.00303665
Lacsan1|1051473	Lacsan1	1051473	gene_7456	Induced during mycorrhization	VII	NA	NA	NA	NA	NA	NA	NA	NA	NA	PF00651	BTB	NA	Transcription factor	Holds a BTB domain	OG0005054	69.6871	62.7195	57.7381	653.446	443.61	673.952	3.25264	2.4e-06
Lacsan1|1092890	Lacsan1	1092890	gene_10108	Induced during mycorrhization	VII	NA	NA	NA	NA	NA	NA	NA	NA	NA	NA	NA	NA	Unknown	Unknown	OG0010348	0.851395	1.17437	1.3847	9.07828	7.01614	7.24682	3.27381	0.0420552
Lacsan1|1370879	Lacsan1	1370879	gene_9202	Induced during mycorrhization	VII	NA	NA	NA	NA	NA	NA	NA	NA	NA	NA	NA	NA	Unknown	Unknown	OG0000169	0	0	0.398442	8.47682	8.11336	6.30785	4.43773	5.88e-09
Lacsan1|1412929	Lacsan1	1412929	gene_2231	Induced during mycorrhization	VII	NA	NA	NA	NA	NA	NA	NA	NA	NA	PF00651	BTB	NA	Transcription factor	Holds a BTB domain	OG0009999	2.35646	3.11658	1.76045	38.3232	24.5944	31.5729	3.77779	5.27e-08
Lacsan1|1857869	Lacsan1	1857869	gene_14124	Induced during mycorrhization	VII	NA	NA	NA	NA	NA	NA	NA	NA	NA	PF01822	WSC	Carbohydrate transport and metabolism ; Posttranslational modification, protein turnover, chaperones	Other function	Holds a WSC domain	OG0000699	0.374874	1.01757	0.236532	2.16185	5.71417	13.5108	3.43766	0.0016486
Lacsan1|185907	Lacsan1	185907	gene_13896	Induced during mycorrhization	VII	NA	NA	NA	NA	NA	NA	NA	NA	NA	PF00651	BTB	NA	Transcription factor	Holds a BTB domain	OG0009621	0.88176	0.904923	0.666768	39.393	6.69488	61.8874	4.66087	0.00910847
Lacsan1|1901691	Lacsan1	1901691	gene_1783	Induced during mycorrhization	VII	NA	NA	NA	NA	NA	NA	NA	NA	NA	PF01185	Hydrophobin	NA	Other function	Hydrophobin	OG0002374	1.06005	2.54289	1.51818	59.1244	18.4512	264.485	6.09341	0.0200004
Lacsan1|1902143	Lacsan1	1902143	gene_2207	Induced during mycorrhization	VII	NA	NA	NA	NA	NA	NA	NA	NA	NA	PF06314	ADC	NA	Other function	Acetoacetate decarboxylase	OG0001050	0.402312	0.702984	0.697043	116.372	108.479	81.0369	7.76795	1.86e-30
Lacsan1|1902815	Lacsan1	1902815	gene_3574	Induced during mycorrhization	VII	NA	NA	NA	NA	NA	NA	NA	NA	NA	PF00096,PF13465,PF13894	zf-C2H2,zf-H2C2_2,zf-C2H2_4	Transcription	Transcription factor	Holds a zinc finger domain	OG0002956	179.809	153.236	191.621	1639.81	689.978	2461.47	3.42645	0.0094465
Lacsan1|1906234	Lacsan1	1906234	gene_9941	Induced during mycorrhization	VII	SSP	NA	NA	NA	NA	NA	NA	NA	NA	PF01822	WSC	Carbohydrate transport and metabolism ; Posttranslational modification, protein turnover, chaperones	Protease	Peptidase subfamily P2	OG0001861	4.26183	4.55573	4.22854	68.1466	61.7114	101.692	4.4185	2.62e-18
Lacsan1|1906235	Lacsan1	1906235	gene_9942	Induced during mycorrhization	VII	SSP	NA	NA	NA	NA	NA	NA	NA	NA	PF01822	WSC	Carbohydrate transport and metabolism ; Posttranslational modification, protein turnover, chaperones	Other function	Holds a WSC domain	OG0009950	1.66375	0.605215	0.911379	25.5162	13.4625	29.4834	3.97799	2.44e-08
Lacsan1|1934494	Lacsan1	1934494	gene_2536	Induced during mycorrhization	VII	NA	NA	NA	NA	NA	NA	NA	NA	NA	PF01627	Hpt	Signal transduction mechanisms	Other function	Involved in signal transduction	OG0008311	134.169	114.184	151.251	853.738	447.31	871.151	2.93624	0.04017
Lacsan1|1940213	Lacsan1	1940213	gene_4220	Induced during mycorrhization	VII	NA	NA	NA	NA	NA	NA	NA	NA	NA	PF01713	Smr	Replication, recombination and repair	Other function	Holds a Smr domain	OG0012437	0	0	0.682399	6.74938	4.94665	7.52402	4.75312	0.000927561
Lacsan1|1953234	Lacsan1	1953234	gene_5476	Induced during mycorrhization	VII	NA	NA	NA	NA	NA	NA	NA	NA	NA	PF06140	Ifi-6-16	NA	Other function	IFI-6-16	OG0017335	1.85127	0.93642	1.08297	219.234	69.5976	281.26	6.65162	1.43e-08
Lacsan1|2030970	Lacsan1	2030970	gene_17735	Induced during mycorrhization	VII	NA	NA	NA	NA	NA	NA	NA	NA	NA	PF06094	GGACT	NA	Other function	Holds a GGACT domain	OG0003176	17.1161	19.4667	19.1731	122.076	110.054	107.963	2.90454	4.77e-06
Lacsan1|2047698	Lacsan1	2047698	gene_20165	Induced during mycorrhization	VII	NA	NA	NA	NA	NA	NA	NA	NA	NA	NA	NA	NA	Unknown	Unknown	OG0011285	5.36961	5.24611	4.94955	139.16	176.996	149.69	5.34348	1.08e-90
Lacsan1|2062873	Lacsan1	2062873	gene_1081	Induced during mycorrhization	VII	NA	NA	NA	NA	NA	NA	NA	NA	NA	NA	NA	NA	Unknown	Unknown	OG0006144	58.6815	57.605	60.4695	359.931	842.782	258.025	3.18768	0.0345756
Lacsan1|2064758	Lacsan1	2064758	gene_2550	Induced during mycorrhization	VII	NA	NA	NA	NA	NA	NA	NA	NA	NA	NA	NA	NA	Unknown	Unknown	OG0005358	84.1708	92.3992	86.4412	532.571	384.97	539.833	2.7611	0.00975024
Lacsan1|2067689	Lacsan1	2067689	gene_5397	Induced during mycorrhization	VII	NA	NA	NA	NA	NA	NA	NA	NA	NA	PF00248	Aldo_ket_red	Energy production and conversion	Other function	Aldo/keto reductase	OG0017603	7.05404	7.94237	5.53886	68.2393	56.6349	36.9114	3.15669	0.000205932
Lacsan1|210997	Lacsan1	210997	gene_13339	Induced during mycorrhization	VII	NA	NA	NA	NA	NA	NA	NA	NA	NA	PF00172	Zn_clus	NA	Transcription factor	Holds a zinc finger domain	OG0004301	15.6507	20.9109	14.0218	136.817	77.2216	143.356	3.43794	7.61e-05
Lacsan1|2175105	Lacsan1	2175105	gene_7450	Induced during mycorrhization	VII	NA	NA	NA	NA	NA	NA	NA	NA	NA	PF11901	DUF3421	NA	Unknown	Unknown	OG0004762	28.5757	22.9679	45.3754	1632.96	1604.61	388.762	5.46891	4.34e-06
Lacsan1|2189206	Lacsan1	2189206	gene_10975	Induced during mycorrhization	VII	NA	NA	NA	NA	NA	NA	NA	NA	NA	NA	NA	NA	Unknown	Unknown	OG0002977	12.193	8.81276	12.9844	108.921	132.524	124.548	3.39367	9.86e-15
Lacsan1|2229013	Lacsan1	2229013	gene_8229	Induced during mycorrhization	VII	NA	NA	NA	NA	NA	NA	NA	NA	NA	NA	NA	NA	Unknown	Unknown	OG0001057	2.73476	8.72243	4.20242	47.0969	52.9257	22.9234	3.27313	0.0179823
Lacsan1|2232722	Lacsan1	2232722	gene_13894	Induced during mycorrhization	VII	NA	NA	NA	NA	NA	NA	NA	NA	NA	NA	NA	NA	Unknown	Unknown	OG0004580	0.362865	1.22974	0.488217	6.11206	3.50992	7.34499	4.08547	0.0340758
Lacsan1|2232725	Lacsan1	2232725	gene_13897	Induced during mycorrhization	VII	NA	NA	NA	NA	NA	NA	NA	NA	NA	PF00651	BTB	NA	Transcription factor	Holds a BTB domain	OG0009135	0.350537	0.849051	0.643523	48.065	13.805	59.0909	6.45374	1.32e-06
Lacsan1|2233567	Lacsan1	2233567	gene_14567	Induced during mycorrhization	VII	NA	NA	NA	NA	NA	NA	NA	NA	NA	NA	NA	NA	Unknown	Unknown	OG0007773	0	0	0	1.31337	0	0.327687	4.74886	0.0146458
Lacsan1|260298	Lacsan1	260298	gene_14394	Induced during mycorrhization	VII	NA	NA	NA	NA	NA	NA	NA	NA	NA	PF07173	GRDP-like	NA	Other function	GRDP-like	OG0003929	1.11045	0.843856	3.07698	39.9651	25.5275	28.8483	4.2292	5.46e-06
Lacsan1|263018	Lacsan1	263018	gene_14125	Induced during mycorrhization	VII	NA	NA	NA	NA	NA	NA	NA	NA	NA	PF01822	WSC	Carbohydrate transport and metabolism ; Posttranslational modification, protein turnover, chaperones	Other function	Holds a WSC domain	OG0000699	0.318718	0	0	41.8465	52.4856	50.7067	7.66625	1.47e-53
Lacsan1|292422	Lacsan1	292422	gene_15418	Induced during mycorrhization	VII	Secreted	NA	NA	NA	NA	NA	NA	NA	NA	PF00646	F-box	NA	Other function	Holds a F-box domain	OG0006587	4.04493	2.94788	3.60867	32.0924	18.5536	44.5043	3.33616	0.00375667
Lacsan1|440173	Lacsan1	440173	gene_14731	Induced during mycorrhization	VII	NA	NA	NA	NA	NA	NA	NA	NA	NA	PF00096	zf-C2H2	General function prediction only	Transcription factor	Holds a zinc finger domain	OG0001888	7.25141	10.7067	9.0509	47.1735	61.4679	39.1112	2.88338	0.00242041
Lacsan1|566245	Lacsan1	566245	gene_5355	Induced during mycorrhization	VII	NA	NA	NA	NA	NA	NA	NA	NA	NA	PF00651	BTB	NA	Transcription factor	Holds a BTB domain	OG0000451	4.39548	4.39503	4.21713	39.7987	18.9673	37.1393	3.08288	0.0172804
Lacsan1|702351	Lacsan1	702351	gene_5947	Induced during mycorrhization	VII	NA	NA	NA	NA	NA	NA	NA	NA	NA	NA	NA	NA	Unknown	Unknown	OG0000185	0.292999	0	0	4.96962	3.42192	5.64851	5.97144	0.0133014
Lacsan1|71687	Lacsan1	71687	gene_2945	Induced during mycorrhization	VII	NA	NA	NA	NA	NA	NA	NA	NA	NA	PF13302,PF00583,PF13420,PF13523,PF13673	Acetyltransf_3,Acetyltransf_1,Acetyltransf_4,Acetyltransf_8,Acetyltransf_10	NA	Transcription factor	Acetyltransferase	OG0009362	1.07687	2.41867	1.28307	15.4772	17.2246	16.7937	3.77301	0.000345995
Lacsan1|774467	Lacsan1	774467	gene_1923	Induced during mycorrhization	VII	NA	NA	NA	NA	NA	NA	NA	NA	NA	NA	NA	NA	Unknown	Unknown	OG0005246	10.957	12.3781	25.9716	125.523	156.886	154.073	3.84957	0.000120625
Lacsan1|828832	Lacsan1	828832	gene_7891	Induced during mycorrhization	VII	NA	NA	NA	NA	NA	NA	NA	NA	NA	NA	NA	NA	Unknown	Unknown	OG0010796	2.42571	4.65586	3.31169	39.8609	22.324	70.0869	3.92948	5.76e-05
Lacsan1|MSTRG.12040	Lacsan1	NA	MSTRG.12040	Induced during mycorrhization	VII	NA	NA	NA	NA	NA	NA	NA	NA	NA	PF09286	Pro-kuma_activ	NA			OG0013434	2.2266	2.11322	2.31227	17.0331	10.0838	17.2627	3.16032	0.0108311
Lacsan1|MSTRG.12593	Lacsan1	NA	MSTRG.12593	Induced during mycorrhization	VII	NA	NA	NA	NA	NA	NA	NA	NA	NA	NA	NA	NA	Unknown	Unknown	OG0013567	5.18221	4.41339	4.91333	51.0768	48.1497	60.2635	3.83259	0.00858294
Lacsan1|MSTRG.9190	Lacsan1	NA	MSTRG.9190	Induced during mycorrhization	VII	NA	NA	NA	NA	NA	NA	NA	NA	NA	NA	NA	NA	Unknown	Unknown	OG0013567	10.517	8.78352	9.07856	100.646	114.442	121.179	3.79512	6.51e-21
Lacsan1|1011496	Lacsan1	1011496	gene_10504	Induced during mycorrhization	IV	Secreted	NA	NA	NA	NA	S53	non-cannonical region	3.4.14.9	Tripeptidyl-peptidase I.	PF09286	Pro-kuma_activ	NA	Protease	Sedolisin (S53)	OG0000035	1.43611	1.24567	1.7879	9.68536	17.4597	10.3555	3.35984	0.000687855
Lacsan1|1026169	Lacsan1	1026169	gene_22701	Induced during mycorrhization	IV	Secreted	NA	NA	NA	NA	S53	partial non-cannonical region	3.4.14.9	Tripeptidyl-peptidase I.	PF09286	Pro-kuma_activ	NA	Protease	Sedolisin (S53)	OG0000006	0.395646	0.442978	0.124511	3.81434	3.57343	6.54293	3.68995	0.0103927
Lacsan1|116583	Lacsan1	116583	gene_11601	Induced during mycorrhization	IV	Secreted	NA	NA	NA	NA	S53	non-cannonical region	3.4.14.9	Tripeptidyl-peptidase I.	PF09286	Pro-kuma_activ	NA	Protease	Sedolisin (S53)	OG0000269	1.94308	1.16578	1.26179	40.7699	57.7197	28.0241	5.13297	4.34e-22
Lacsan1|1234864	Lacsan1	1234864	gene_9054	Induced during mycorrhization	IV	Secreted	NA	NA	NA	NA	NA	NA	3.4.14.9	Tripeptidyl-peptidase I.	PF09286	Pro-kuma_activ	NA			OG0000035	0.745211	0.550777	0.700205	15.1432	19.5834	11.3551	4.50159	1.18e-12
Lacsan1|1545483	Lacsan1	1545483	gene_3883	Induced during mycorrhization	IV	Secreted	NA	NA	NA	NA	S53	partial non-cannonical region	3.4.14.9	Tripeptidyl-peptidase I.	PF09286	Pro-kuma_activ	NA	Protease	Sedolisin (S53)	OG0005410	4.11972	4.7343	5.12968	20.0494	54.2993	19.1032	3.27634	0.0360865
Lacsan1|1639385	Lacsan1	1639385	gene_13774	Induced during mycorrhization	IV	Secreted	NA	NA	NA	NA	S53	partial non-cannonical region	3.4.14.9	Tripeptidyl-peptidase I.	PF09286	Pro-kuma_activ	NA	Protease	Sedolisin (S53)	OG0000219	3.07338	2.37638	2.83902	32.3413	90.6277	20.6579	3.93291	0.000598318
Lacsan1|1847440	Lacsan1	1847440	gene_5742	Induced during mycorrhization	IV	NA	NA	NA	NA	NA	S53	non-cannonical region	3.4.14.9	Tripeptidyl-peptidase I.	PF09286	Pro-kuma_activ	NA	Protease	Sedolisin (S53)	OG0000085	0.753692	0	0.430674	11.6835	14.8279	9.08656	4.82987	2.57e-08
Lacsan1|1851233	Lacsan1	1851233	gene_9928	Induced during mycorrhization	IV	Secreted	NA	NA	NA	NA	S53	partial non-cannonical region	3.4.14.9	Tripeptidyl-peptidase I.	PF09286	Pro-kuma_activ	NA	Protease	Sedolisin (S53)	OG0000035	0.777052	0.547386	1.48268	112.325	204.618	61.0152	7.22225	8.32e-35
Lacsan1|1851661	Lacsan1	1851661	gene_10510	Induced during mycorrhization	IV	Secreted	NA	NA	NA	NA	S53	cannonical region	3.4.14.9	Tripeptidyl-peptidase I.	PF09286	Pro-kuma_activ	NA	Protease	Sedolisin (S53)	OG0001682	0.640737	0.706248	0.762158	33.1826	53.9588	15.6968	5.75162	9.63e-17
Lacsan1|1853554	Lacsan1	1853554	gene_12277	Induced during mycorrhization	IV	Secreted	NA	NA	NA	NA	S53	partial non-cannonical region	3.4.14.9	Tripeptidyl-peptidase I.	PF09286	Pro-kuma_activ	NA	Protease	Sedolisin (S53)	OG0000006	0.403905	0.803283	1.02161	17.8951	42.016	12.5983	5.49678	2.69e-16
Lacsan1|1854332	Lacsan1	1854332	gene_11803	Induced during mycorrhization	IV	Secreted	NA	NA	NA	NA	S53	cannonical region	3.4.14.9	Tripeptidyl-peptidase I.	PF09286	Pro-kuma_activ	NA	Protease	Sedolisin (S53)	OG0002866	5.06725	4.4788	9.3398	107.437	120.921	53.91	4.08061	8.93e-09
Lacsan1|1855655	Lacsan1	1855655	gene_12684	Induced during mycorrhization	IV	Secreted	NA	NA	NA	NA	S53	cannonical region	3.4.14.9	Tripeptidyl-peptidase I.	PF09286	Pro-kuma_activ	NA	Protease	Sedolisin (S53)	OG0001682	0.090903	0	0	7.32542	2.91421	4.83781	5.8581	1.51e-06
Lacsan1|1861524	Lacsan1	1861524	gene_17413	Induced during mycorrhization	IV	NA	NA	NA	NA	NA	NA	NA	NA	NA	PF02535	Zip	Inorganic ion transport and metabolism	Other function	Holds a Zip domain	OG0001017	0	6.11048	10.5033	37.9165	56.211	30.5719	3.1853	0.000521393
Lacsan1|1882655	Lacsan1	1882655	gene_6669	Induced during mycorrhization	IV	NA	NA	NA	NA	NA	S53	partial non-cannonical region	3.4.14.9	Tripeptidyl-peptidase I.	PF09286	Pro-kuma_activ	NA	Protease	Sedolisin (S53)	OG0000006	1.70376	1.68262	1.18385	20.1097	14.1791	18.8272	4.1358	1.11e-10
Lacsan1|1888030	Lacsan1	1888030	gene_12274	Induced during mycorrhization	IV	Secreted	NA	NA	NA	NA	S53	non-cannonical region	3.4.14.9	Tripeptidyl-peptidase I.	PF09286,PF00082	Pro-kuma_activ,Peptidase_S8	NA	Protease	Sedolisin (S53)	OG0000006	1.48945	0.953002	1.36318	33.4159	28.9115	45.504	5.21232	1.43e-25
Lacsan1|1888226	Lacsan1	1888226	gene_12557	Induced during mycorrhization	IV	NA	NA	NA	NA	NA	S53	non-cannonical region	3.4.14.9	Tripeptidyl-peptidase I.	PF09286,PF00082	Pro-kuma_activ,Peptidase_S8	NA	Protease	Sedolisin (S53)	OG0009318	1.20614	1.54161	1.17747	81.9325	19.3352	87.8736	5.92069	7.83e-07
Lacsan1|1892517	Lacsan1	1892517	gene_14490	Induced during mycorrhization	IV	Secreted	NA	NA	NA	NA	NA	NA	3.4.14.9	Tripeptidyl-peptidase I.	PF09286	Pro-kuma_activ	NA			OG0000626	0.187277	0.345025	0.416774	12.5606	37.9654	16.3797	5.52727	2.94e-13
Lacsan1|1892631	Lacsan1	1892631	gene_16436	Induced during mycorrhization	IV	Secreted	NA	NA	NA	NA	S53	non-cannonical region	3.4.14.9	Tripeptidyl-peptidase I.	PF09286	Pro-kuma_activ	NA	Protease	Sedolisin (S53)	OG0000074	2.98396	2.30407	2.32023	48.158	103.052	50.9804	5.05048	1.46e-17
Lacsan1|1893113	Lacsan1	1893113	gene_15924	Induced during mycorrhization	IV	Secreted	NA	NA	NA	NA	S53	partial cannonical region	3.4.14.9	Tripeptidyl-peptidase I.	PF09286	Pro-kuma_activ	NA	Protease	Sedolisin (S53)	OG0000074	2.676	3.80517	2.71564	51.7847	35.4992	34.5369	3.97007	6.75e-14
Lacsan1|1893333	Lacsan1	1893333	gene_19410	Induced during mycorrhization	IV	Secreted	NA	NA	NA	NA	S53	non-cannonical region	3.4.14.9	Tripeptidyl-peptidase I.	PF09286	Pro-kuma_activ	NA	Protease	Sedolisin (S53)	OG0000006	0.395018	0	0.193916	5.16053	8.20282	5.90229	4.22693	1.54e-06
Lacsan1|1907840	Lacsan1	1907840	gene_12276	Induced during mycorrhization	IV	Secreted	NA	NA	NA	NA	S53	partial non-cannonical region	3.4.14.9	Tripeptidyl-peptidase I.	PF09286	Pro-kuma_activ	NA	Protease	Sedolisin (S53)	OG0000006	0.921592	0.565593	1.5294	8.59952	8.38061	6.85875	3.14221	0.0421292
Lacsan1|1911329	Lacsan1	1911329	gene_14885	Induced during mycorrhization	IV	NA	NA	NA	NA	NA	NA	NA	NA	NA	PF07690	MFS_1	Carbohydrate transport and metabolism	Transporter/Permease	Unknown transporter	OG0005825	2.25187	2.19426	2.16836	36.9887	41.5176	32.8394	4.30354	5.18e-20
Lacsan1|1911358	Lacsan1	1911358	gene_14918	Induced during mycorrhization	IV	Secreted	NA	NA	NA	NA	S53	non-cannonical region	3.4.14.9	Tripeptidyl-peptidase I.	PF09286	Pro-kuma_activ	NA	Protease	Sedolisin (S53)	OG0000918	0	0	0.062499	19.2628	31.6312	8.02141	9.87113	2.03e-08
Lacsan1|1911639	Lacsan1	1911639	gene_18832	Induced during mycorrhization	IV	NA	NA	NA	NA	NA	S53	non-cannonical region	3.4.14.9	Tripeptidyl-peptidase I.	PF09286	Pro-kuma_activ	NA	Protease	Sedolisin (S53)	OG0002308	7.68888	7.42551	7.14061	105.107	87.6968	98.4962	3.89558	1.68e-25
Lacsan1|1913786	Lacsan1	1913786	gene_17415	Induced during mycorrhization	IV	Secreted	NA	NA	NA	NA	S53	partial non-cannonical region	3.4.14.9	Tripeptidyl-peptidase I.	PF09286	Pro-kuma_activ	NA	Protease	Sedolisin (S53)	OG0013306	2.49362	2.66465	2.18924	21.1881	27.6868	20.9402	3.52487	5.64e-06
Lacsan1|1913789	Lacsan1	1913789	gene_17419	Induced during mycorrhization	IV	Secreted	NA	NA	NA	NA	S53	cannonical region	3.4.14.9	Tripeptidyl-peptidase I.	PF09286	Pro-kuma_activ	NA	Protease	Sedolisin (S53)	OG0000159	0.410369	0.530765	0.83502	6.76344	16.4904	4.16002	4.59388	0.000123791
Lacsan1|2063975	Lacsan1	2063975	gene_2665	Induced during mycorrhization	IV	Secreted	NA	NA	NA	NA	S53	partial cannonical region	3.4.14.9	Tripeptidyl-peptidase I.	PF09286	Pro-kuma_activ	NA	Protease	Sedolisin (S53)	OG0000010	11.9238	12.7498	10.7553	70.5802	67.0454	73.4891	2.86556	6.63e-05
Lacsan1|2074312	Lacsan1	2074312	gene_12485	Induced during mycorrhization	IV	Secreted	NA	NA	NA	NA	NA	NA	3.4.23.5	Cathepsin D.	PF00026,PF14543	Asp,TAXi_N	Posttranslational modification, protein turnover, chaperones	Protease	Pepsin (A1)	OG0003962	45.1581	38.2976	40.0996	573.637	711.228	381.434	3.87172	6.54e-13
Lacsan1|2076753	Lacsan1	2076753	gene_14909	Induced during mycorrhization	IV	Secreted	NA	NA	NA	NA	S53	non-cannonical region	3.4.14.9	Tripeptidyl-peptidase I.	PF09286	Pro-kuma_activ	NA	Protease	Sedolisin (S53)	OG0000918	6.73136	6.19981	8.10422	70.1035	85.0613	64.9364	3.65643	1.8e-19
Lacsan1|2077760	Lacsan1	2077760	gene_18318	Induced during mycorrhization	IV	Secreted	NA	NA	NA	NA	S53	partial cannonical region	3.4.14.9	Tripeptidyl-peptidase I.	PF09286	Pro-kuma_activ	NA	Protease	Sedolisin (S53)	OG0000159	1.30956	2.05285	0.839788	32.4743	58.6599	24.7317	4.89496	5.58e-13
Lacsan1|2078412	Lacsan1	2078412	gene_16254	Induced during mycorrhization	IV	Secreted	NA	NA	NA	NA	S53	non-cannonical region	3.4.14.9	Tripeptidyl-peptidase I.	PF09286	Pro-kuma_activ	NA	Protease	Sedolisin (S53)	OG0000918	0	0	0	53.5864	61.3197	33.365	6.91994	3.54e-14
Lacsan1|2082267	Lacsan1	2082267	gene_22016	Induced during mycorrhization	IV	Secreted	NA	NA	NA	NA	S53	non-cannonical region	3.4.14.9	Tripeptidyl-peptidase I.	PF09286	Pro-kuma_activ	NA	Protease	Sedolisin (S53)	OG0004511	2.26792	2.8325	1.76278	37.909	39.7076	42.1071	5.33155	1.04e-26
Lacsan1|2082643	Lacsan1	2082643	gene_20656	Induced during mycorrhization	IV	Secreted	NA	NA	NA	NA	S53	partial non-cannonical region	3.4.14.9	Tripeptidyl-peptidase I.	PF09286	Pro-kuma_activ	NA	Protease	Sedolisin (S53)	OG0000555	3.5526	3.43948	4.79754	31.4794	35.9912	22.8504	3.3342	1.35e-06
Lacsan1|2096032	Lacsan1	2096032	gene_9912	Induced during mycorrhization	IV	NA	NA	NA	NA	NA	S53	non-cannonical region	3.4.14.9	Tripeptidyl-peptidase I.	PF09286	Pro-kuma_activ	NA	Protease	Sedolisin (S53)	OG0000035	11.062	12.7913	11.2058	83.4066	166.747	51.871	3.52493	0.000453506
Lacsan1|2112577	Lacsan1	2112577	gene_3036	Induced during mycorrhization	IV	Secreted	NA	NA	NA	NA	S53	partial cannonical region	3.4.14.9	Tripeptidyl-peptidase I.	PF09286	Pro-kuma_activ	NA	Protease	Sedolisin (S53)	OG0000035	34.9179	32.6035	28.1271	494.078	436.191	282.124	3.96941	3.65e-20
Lacsan1|2113073	Lacsan1	2113073	gene_5791	Induced during mycorrhization	IV	Secreted	NA	NA	NA	NA	NA	NA	3.4.14.9	Tripeptidyl-peptidase I.	PF09286	Pro-kuma_activ	NA			OG0000720	0.115094	0.074936	0.151675	12.9954	17.6224	10.7638	6.26553	3.23e-15
Lacsan1|2114897	Lacsan1	2114897	gene_12558	Induced during mycorrhization	IV	NA	NA	NA	NA	NA	S53	partial non-cannonical region	3.4.14.9	Tripeptidyl-peptidase I.	PF09286	Pro-kuma_activ	NA	Protease	Sedolisin (S53)	OG0009318	0.893923	1.37317	0.869057	37.441	31.5492	45.9993	5.72316	1.76e-27
Lacsan1|2114940	Lacsan1	2114940	gene_9159	Induced during mycorrhization	IV	NA	NA	NA	NA	NA	S53	non-cannonical region	3.4.14.9	Tripeptidyl-peptidase I.	PF09286	Pro-kuma_activ	NA	Protease	Sedolisin (S53)	OG0010416	1.73043	2.69293	1.50808	28.4329	29.0976	30.7258	4.13859	2.33e-17
Lacsan1|2115501	Lacsan1	2115501	gene_14922	Induced during mycorrhization	IV	NA	NA	NA	NA	NA	NA	NA	NA	NA	PF07690,PF00083	MFS_1,Sugar_tr	General function prediction only	Transporter/Permease	Sugar transporter	OG0002892	27.4871	22.113	22.218	236.22	267.671	209.684	3.69731	1.3e-28
Lacsan1|2115965	Lacsan1	2115965	gene_14117	Induced during mycorrhization	IV	Secreted	NA	NA	NA	NA	S53	non-cannonical region	3.4.14.9	Tripeptidyl-peptidase I.	PF09286	Pro-kuma_activ	NA	Protease	Sedolisin (S53)	OG0000322	0.220952	0.471619	0	10.2307	14.2605	12.9697	4.71377	2.1e-12
Lacsan1|2116184	Lacsan1	2116184	gene_14475	Induced during mycorrhization	IV	NA	NA	NA	NA	NA	S53	partial non-cannonical region	3.4.14.9	Tripeptidyl-peptidase I.	PF09286	Pro-kuma_activ	NA	Protease	Sedolisin (S53)	OG0000052	3.46356	3.47079	3.25261	30.5874	63.7661	44.6333	3.85121	1.29e-10
Lacsan1|2116300	Lacsan1	2116300	gene_14758	Induced during mycorrhization	IV	NA	NA	NA	NA	NA	NA	NA	3.4.14.9	Tripeptidyl-peptidase I.	PF09286	Pro-kuma_activ	NA			OG0000455	1.08884	0.358255	1.08906	202.608	73.421	228.642	7.57926	1.98e-32
Lacsan1|2116343	Lacsan1	2116343	gene_15931	Induced during mycorrhization	IV	NA	NA	NA	NA	NA	NA	NA	3.4.14.9	Tripeptidyl-peptidase I.	PF09286	Pro-kuma_activ	NA			OG0000035	1.18155	0.991493	1.50074	10.4533	17.7248	12.9329	3.71618	5.63e-07
Lacsan1|2116786	Lacsan1	2116786	gene_19264	Induced during mycorrhization	IV	NA	NA	NA	NA	NA	S53	cannonical region	3.4.14.9	Tripeptidyl-peptidase I.	PF09286	Pro-kuma_activ	NA	Protease	Sedolisin (S53)	OG0000188	0	0	0	3.18808	3.7251	2.73047	5.59702	0.000453506
Lacsan1|2124786	Lacsan1	2124786	gene_11600	Induced during mycorrhization	IV	Secreted	NA	NA	NA	NA	S53	non-cannonical region	3.4.14.9	Tripeptidyl-peptidase I.	PF09286	Pro-kuma_activ	NA	Protease	Sedolisin (S53)	OG0000269	2.94852	4.11462	4.18609	68.6345	142.427	63.7657	4.83375	3.79e-16
Lacsan1|2125765	Lacsan1	2125765	gene_13709	Induced during mycorrhization	IV	NA	NA	NA	NA	NA	S53	partial non-cannonical region	3.4.14.9	Tripeptidyl-peptidase I.	PF09286	Pro-kuma_activ	NA	Protease	Sedolisin (S53)	OG0002003	0.335594	0.405176	0.369609	53.9029	26.0102	41.5689	6.9555	1.04e-26
Lacsan1|2132551	Lacsan1	2132551	gene_14106	Induced during mycorrhization	IV	NA	NA	NA	NA	NA	S53	non-cannonical region	3.4.14.9	Tripeptidyl-peptidase I.	PF09286	Pro-kuma_activ	NA	Protease	Sedolisin (S53)	OG0004511	1.30027	0.453578	1.5703	28.1266	9.74992	34.8204	4.80758	8.3e-09
Lacsan1|2138506	Lacsan1	2138506	gene_16439	Induced during mycorrhization	IV	Secreted	NA	NA	NA	NA	S53	non-cannonical region	3.4.14.9	Tripeptidyl-peptidase I.	PF09286	Pro-kuma_activ	NA	Protease	Sedolisin (S53)	OG0000074	0.122519	0.11583	0	17.1806	26.5914	11.4807	7.80178	8.49e-14
Lacsan1|2143769	Lacsan1	2143769	gene_16252	Induced during mycorrhization	IV	NA	NA	NA	NA	NA	S53	partial non-cannonical region	3.4.14.9	Tripeptidyl-peptidase I.	PF09286	Pro-kuma_activ	NA	Protease	Sedolisin (S53)	OG0017748	3.92389	4.24537	3.7514	46.1699	80.8038	36.9117	4.0129	1.12e-09
Lacsan1|2155205	Lacsan1	2155205	gene_6473	Induced during mycorrhization	IV	Secreted	NA	NA	NA	NA	S53	non-cannonical region	3.4.14.9	Tripeptidyl-peptidase I.	PF09286	Pro-kuma_activ	NA	Protease	Sedolisin (S53)	OG0000781	2.81834	1.76426	1.27377	32.4605	22.3165	21.3378	3.92125	1.47e-10
Lacsan1|2155784	Lacsan1	2155784	gene_21349	Induced during mycorrhization	IV	Secreted	NA	NA	NA	NA	S53	cannonical region	3.4.14.9	Tripeptidyl-peptidase I.	PF09286,PF00082	Pro-kuma_activ,Peptidase_S8	NA	Protease	Sedolisin (S53)	OG0000246	0.670383	0.582554	0.370336	6.53373	3.73352	4.84801	3.35893	0.0201206
Lacsan1|2220614	Lacsan1	2220614	gene_9869	Induced during mycorrhization	IV	NA	NA	NA	NA	NA	S53	non-cannonical region	3.4.14.9	Tripeptidyl-peptidase I.	PF09286	Pro-kuma_activ	NA	Protease	Sedolisin (S53)	OG0012126	4.02598	2.12516	3.41269	89.173	79.5636	88.9515	4.8475	2.45e-39
Lacsan1|2222616	Lacsan1	2222616	gene_17874	Induced during mycorrhization	IV	NA	NA	NA	NA	NA	S53	non-cannonical region	3.4.14.9	Tripeptidyl-peptidase I.	PF09286	Pro-kuma_activ	NA	Protease	Sedolisin (S53)	OG0009322	1.68236	1.65988	1.74184	45.8441	96.4278	41.9371	5.21295	1.24e-13
Lacsan1|2229482	Lacsan1	2229482	gene_12408	Induced during mycorrhization	IV	Secreted	NA	NA	NA	NA	S53	non-cannonical region	3.4.14.9	Tripeptidyl-peptidase I.	PF09286	Pro-kuma_activ	NA	Protease	Sedolisin (S53)	OG0000110	0.188188	0.168886	0.092474	60.899	39.2391	61.0647	8.04391	6.61e-34
Lacsan1|2229484	Lacsan1	2229484	gene_12411	Induced during mycorrhization	IV	Secreted	NA	NA	NA	NA	S53	non-cannonical region	3.4.14.9	Tripeptidyl-peptidase I.	PF09286	Pro-kuma_activ	NA	Protease	Sedolisin (S53)	OG0000110	0	0	0	18.2574	14.2422	17.7089	7.74276	0.000253326
Lacsan1|2230678	Lacsan1	2230678	gene_12279	Induced during mycorrhization	IV	Secreted	NA	NA	NA	NA	S53	partial non-cannonical region	3.4.14.9	Tripeptidyl-peptidase I.	PF09286,PF00082	Pro-kuma_activ,Peptidase_S8	NA	Protease	Sedolisin (S53)	OG0000006	0.544992	0.239823	0.433258	13.3698	17.4977	10.383	5.69046	7.77e-13
Lacsan1|2231154	Lacsan1	2231154	gene_11784	Induced during mycorrhization	IV	Secreted	NA	NA	NA	NA	S53	partial non-cannonical region	3.4.14.9	Tripeptidyl-peptidase I.	PF09286	Pro-kuma_activ	NA	Protease	Sedolisin (S53)	OG0000626	0.491726	0.544236	0.547616	4.67881	4.1185	5.74891	3.26169	0.0444624
Lacsan1|2231733	Lacsan1	2231733	gene_14325	Induced during mycorrhization	IV	Secreted	NA	NA	NA	NA	S53	cannonical region	3.4.14.9	Tripeptidyl-peptidase I.	PF09286	Pro-kuma_activ	NA	Protease	Sedolisin (S53)	OG0002866	2.13365	2.58658	3.17266	82.1008	99.2788	44.2135	5.2348	2.9e-26
Lacsan1|2232110	Lacsan1	2232110	gene_11712	Induced during mycorrhization	IV	Secreted	NA	NA	NA	NA	S53	partial cannonical region	3.4.14.9	Tripeptidyl-peptidase I.	PF09286	Pro-kuma_activ	NA	Protease	Sedolisin (S53)	OG0007561	3.49581	2.93411	3.30358	28.697	13.1382	34.4797	3.36163	0.00243887
Lacsan1|2232272	Lacsan1	2232272	gene_11588	Induced during mycorrhization	IV	Secreted	NA	NA	NA	NA	S53	non-cannonical region	3.4.14.9	Tripeptidyl-peptidase I.	PF09286	Pro-kuma_activ	NA	Protease	Sedolisin (S53)	OG0001376	5.52204	4.88865	5.34287	5.38532	27.3321	44.8833	3.35637	1.73e-06
Lacsan1|2233102	Lacsan1	2233102	gene_14381	Induced during mycorrhization	IV	Secreted	NA	NA	NA	NA	S53	non-cannonical region	3.4.14.9	Tripeptidyl-peptidase I.	PF09286	Pro-kuma_activ	NA	Protease	Sedolisin (S53)	OG0011137	0.465001	0.347538	0	22.5735	16.1168	16.8086	6.47874	9.63e-17
Lacsan1|2233312	Lacsan1	2233312	gene_15186	Induced during mycorrhization	IV	Secreted	NA	NA	NA	NA	S53	non-cannonical region	3.4.14.9	Tripeptidyl-peptidase I.	PF09286	Pro-kuma_activ	NA	Protease	Sedolisin (S53)	OG0011137	1.25534	0.482818	1.03065	29.3467	29.3064	21.4132	5.8332	2.08e-21
Lacsan1|2234102	Lacsan1	2234102	gene_15930	Induced during mycorrhization	IV	Secreted	NA	NA	NA	NA	S53	non-cannonical region	3.4.14.9	Tripeptidyl-peptidase I.	PF09286	Pro-kuma_activ	NA	Protease	Sedolisin (S53)	OG0000074	5.57995	5.25946	6.13392	19.9328	34.6178	24.3194	3.12395	0.00834778
Lacsan1|2234404	Lacsan1	2234404	gene_18774	Induced during mycorrhization	IV	Secreted	NA	NA	NA	NA	S53	non-cannonical region	3.4.14.9	Tripeptidyl-peptidase I.	PF09286	Pro-kuma_activ	NA	Protease	Sedolisin (S53)	OG0000110	0	0	0.517992	6.76268	13.9126	18.4904	6.45318	0.0192997
Lacsan1|2241021	Lacsan1	2241021	gene_5772	Induced during mycorrhization	IV	Secreted	NA	NA	NA	NA	S53	non-cannonical region	3.4.14.9	Tripeptidyl-peptidase I.	PF09286	Pro-kuma_activ	NA	Protease	Sedolisin (S53)	OG0002982	0.926667	1.14471	0.406265	21.3281	21.9982	13.7765	4.67762	1.48e-12
Lacsan1|2242134	Lacsan1	2242134	gene_6528	Induced during mycorrhization	IV	Secreted	NA	NA	NA	NA	S53	partial non-cannonical region	3.4.14.9	Tripeptidyl-peptidase I.	PF09286	Pro-kuma_activ	NA	Protease	Sedolisin (S53)	OG0000062	1.43334	1.04811	1.34898	10.3501	7.15376	15.8549	3.3248	0.00699808
Lacsan1|2243400	Lacsan1	2243400	gene_10116	Induced during mycorrhization	IV	NA	NA	NA	NA	NA	NA	NA	NA	NA	PF05879	RHD3	NA	Other function	RHD3	OG0012202	0.109229	0	0.125903	1.80235	0.488689	4.03249	5.02073	0.0398996
Lacsan1|2247452	Lacsan1	2247452	gene_16249	Induced during mycorrhization	IV	Secreted	NA	NA	NA	NA	NA	NA	3.4.14.9	Tripeptidyl-peptidase I.	PF09286	Pro-kuma_activ	NA			OG0000918	3.1787	3.01259	3.25055	26.3559	64.0846	14.6466	3.51437	0.0124062
Lacsan1|2247460	Lacsan1	2247460	gene_16257	Induced during mycorrhization	IV	Secreted	NA	NA	NA	NA	S53	non-cannonical region	3.4.14.9	Tripeptidyl-peptidase I.	PF09286	Pro-kuma_activ	NA	Protease	Sedolisin (S53)	OG0000918	0.097892	0.128511	0	9.83651	17.3978	6.39531	6.652	3.58e-08
Lacsan1|295523	Lacsan1	295523	gene_14890	Induced during mycorrhization	IV	Secreted	NA	NA	NA	NA	S53	partial cannonical region	3.4.14.9	Tripeptidyl-peptidase I.	PF09286	Pro-kuma_activ	NA	Protease	Sedolisin (S53)	OG0010132	5.60263	5.58864	4.68886	31.4221	58.0863	32.7306	3.26898	0.000162253
Lacsan1|296543	Lacsan1	296543	gene_14910	Induced during mycorrhization	IV	Secreted	NA	NA	NA	NA	S53	non-cannonical region	3.4.14.9	Tripeptidyl-peptidase I.	PF09286	Pro-kuma_activ	NA	Protease	Sedolisin (S53)	OG0000918	0.258249	0.542405	0.418351	23.7668	14.8436	36.8321	5.72311	4.56e-18
Lacsan1|297427	Lacsan1	297427	gene_14921	Induced during mycorrhization	IV	NA	NA	NA	NA	NA	S53	non-cannonical region	3.4.14.9	Tripeptidyl-peptidase I.	PF09286	Pro-kuma_activ	NA	Protease	Sedolisin (S53)	OG0000918	0	0	0.067395	47.2371	56.3096	31.2528	9.33414	3.97e-10
Lacsan1|331089	Lacsan1	331089	gene_17120	Induced during mycorrhization	IV	Secreted	NA	NA	NA	NA	S53	partial cannonical region	3.4.14.9	Tripeptidyl-peptidase I.	PF09286	Pro-kuma_activ	NA	Protease	Sedolisin (S53)	OG0000035	0.341745	0.25525	0.415089	17.5933	14.6027	8.79367	4.95289	0.0140836
Lacsan1|564825	Lacsan1	564825	gene_5316	Induced during mycorrhization	IV	Secreted	NA	NA	NA	NA	S53	partial non-cannonical region	3.4.14.9	Tripeptidyl-peptidase I.	PF09286	Pro-kuma_activ	NA	Protease	Sedolisin (S53)	OG0000219	2.34272	2.01709	2.57502	37.3169	103.386	20.697	5.36238	8.94e-05
Lacsan1|583478	Lacsan1	583478	gene_18776	Induced during mycorrhization	IV	Secreted	NA	NA	NA	NA	S53	non-cannonical region	3.4.14.9	Tripeptidyl-peptidase I.	PF09286	Pro-kuma_activ	NA	Protease	Sedolisin (S53)	OG0000110	0	0.104279	0.31445	58.0698	39.3815	61.2725	7.36438	2.2e-34
Lacsan1|583515	Lacsan1	583515	gene_18779	Induced during mycorrhization	IV	Secreted	NA	NA	NA	NA	S53	non-cannonical region	3.4.14.9	Tripeptidyl-peptidase I.	PF09286	Pro-kuma_activ	NA	Protease	Sedolisin (S53)	OG0000110	0.4282	0.699943	1.39173	7.7963	6.48147	7.86101	3.49479	0.00667822
Lacsan1|622550	Lacsan1	622550	gene_7927	Induced during mycorrhization	IV	Secreted	NA	NA	NA	NA	S53	non-cannonical region	3.4.14.9	Tripeptidyl-peptidase I.	PF09286	Pro-kuma_activ	NA	Protease	Sedolisin (S53)	OG0000848	0.727748	0.724101	1.93615	29.5282	18.2007	13.1954	4.26651	6.2e-09
Lacsan1|871428	Lacsan1	871428	gene_20202	Induced during mycorrhization	IV	NA	NA	NA	NA	NA	S53	non-cannonical region	3.4.14.9	Tripeptidyl-peptidase I.	PF09286	Pro-kuma_activ	NA	Protease	Sedolisin (S53)	OG0009322	1.58061	2.01381	2.29564	41.9714	70.9047	39.2223	5.06486	3.64e-23
Lacsan1|918310	Lacsan1	918310	gene_9895	Induced during mycorrhization	IV	Secreted	NA	NA	NA	NA	S53	partial cannonical region	3.4.14.9	Tripeptidyl-peptidase I.	PF09286	Pro-kuma_activ	NA	Protease	Sedolisin (S53)	OG0000035	0.042124	0	0.473956	21.582	16.6031	9.65939	5.605	2.41e-10
Lacsan1|933104	Lacsan1	933104	gene_12406	Induced during mycorrhization	IV	Secreted	NA	NA	NA	NA	S53	non-cannonical region	3.4.14.9	Tripeptidyl-peptidase I.	PF09286	Pro-kuma_activ	NA	Protease	Sedolisin (S53)	OG0000110	0.108101	0	0.217609	8.79242	5.77456	6.99412	5.99394	3.58e-09
Lacsan1|MSTRG.10181	Lacsan1	NA	MSTRG.10181	Induced during mycorrhization	IV	NA	NA	NA	NA	NA	NA	NA	NA	NA	PF09286	Pro-kuma_activ	NA			OG0009054	0.274361	0	0.3599	4.48261	6.44604	4.35344	5.03226	2.8e-05
Lacsan1|MSTRG.12842	Lacsan1	NA	MSTRG.12842	Induced during mycorrhization	IV	NA	NA	NA	NA	NA	NA	NA	NA	NA	NA	NA	NA			OG0000845	1.22789	0.596926	1.03867	14.6476	9.94241	13.325	3.97456	1.07e-05
Lacsan1|MSTRG.8391	Lacsan1	NA	MSTRG.8391	Induced during mycorrhization	IV	NA	NA	NA	NA	NA	NA	NA	NA	NA	PF09286	Pro-kuma_activ	NA			OG0000455	3.06583	2.59842	3.53396	82.7295	32.0184	102.047	6.45097	4.79e-22
Lacsan1|MSTRG.8655	Lacsan1	NA	MSTRG.8655	Induced during mycorrhization	IV	NA	NA	NA	NA	NA	NA	NA	NA	NA	PF09286	Pro-kuma_activ	NA			OG0009024	3.61185	2.55147	3.06794	28.6189	28.8623	22.4938	3.30132	5.7e-06
Lacsan1|MSTRG.9317	Lacsan1	NA	MSTRG.9317	Induced during mycorrhization	IV	NA	NA	NA	NA	NA	NA	NA	NA	NA	PF00067	p450	NA	Cytochrome p450		OG0004512	1.93749	1.9881	1.87743	29.6371	56.2526	33.9895	4.38622	3.4e-17
Lacsan1|MSTRG.9844	Lacsan1	NA	MSTRG.9844	Induced during mycorrhization	IV	Secreted	NA	NA	NA	NA	NA	NA	NA	NA	PF09286	Pro-kuma_activ	NA			OG0002380	1.64808	1.42815	1.40029	25.0708	21.8794	15.135	4.18741	1.19e-10
Lacsan1|1093696	Lacsan1	1093696	gene_10117	Induced during mycorrhization	V	NA	NA	NA	NA	NA	NA	NA	NA	NA	PF13519	VWA_2	NA	Other function	Holds a VWA domain	OG0012201	0.629336	0.502985	0.367339	6.03069	3.81215	6.60579	4.05169	1.57e-05
Lacsan1|1179651	Lacsan1	1179651	gene_9660	Induced during mycorrhization	V	NA	NA	NA	NA	NA	NA	NA	NA	NA	PF05368,PF13460,PF03435	NmrA,NAD_binding_10,Sacchrp_dh_NADP	NA	Other function	Putative transcription factor	OG0002753	19.7065	25.0768	70.1596	323.302	783.409	689.918	4.34803	0.0313015
Lacsan1|1299771	Lacsan1	1299771	gene_4638	Induced during mycorrhization	V	Secreted	NA	GH3	NA	NA	NA	NA	3.2.1.21	Beta-glucosidase.	PF01915,PF00933,PF14310	Glyco_hydro_3_C,Glyco_hydro_3,Fn3-like	NA	CAZyme	Glycoside Hydrolase	OG0003442	8.53158	5.20448	6.3078	390.332	848.531	539.623	6.59683	3.93e-53
Lacsan1|1413260	Lacsan1	1413260	gene_2237	Induced during mycorrhization	V	NA	NA	NA	NA	NA	NA	NA	NA	NA	NA	NA	NA	Unknown	Unknown	OG0002565	26.8685	21.209	30.374	695.833	395.227	545.269	4.7763	4.72e-30
Lacsan1|1414418	Lacsan1	1414418	gene_2252	Induced during mycorrhization	V	NA	NA	NA	NA	NA	NA	NA	1.14.13.-	With NADH or NADPH as one donor, and incorporation of one atom	PF00067	p450	Secondary metabolites biosynthesis, transport and catabolism	Cytochrome p450		OG0007349	7.96229	9.54464	8.25996	109.742	215.307	122.118	4.5112	3.45e-23
Lacsan1|1458839	Lacsan1	1458839	gene_11844	Induced during mycorrhization	V	NA	NA	NA	NA	NA	NA	NA	1.14.13.-	With NADH or NADPH as one donor, and incorporation of one atom	PF00067	p450	Secondary metabolites biosynthesis, transport and catabolism	Cytochrome p450		OG0000474	8.85443	7.98373	7.62105	43.5365	59.6227	54.5991	3.01022	1.68e-07
Lacsan1|1558210	Lacsan1	1558210	gene_10341	Induced during mycorrhization	V	NA	NA	NA	NA	NA	NA	NA	NA	NA	NA	NA	NA	Unknown	Unknown	OG0008917	25.3417	31.3763	23.8582	538.455	684.156	465.165	4.61474	1.9e-39
Lacsan1|1624462	Lacsan1	1624462	gene_11216	Induced during mycorrhization	V	NA	NA	NA	NA	NA	NA	NA	NA	NA	PF00172	Zn_clus	NA	Transcription factor	Holds a zinc finger domain	OG0001562	33.8379	35.5045	30.5981	191.76	166.45	446.031	3.55128	0.00342344
Lacsan1|1654136	Lacsan1	1654136	gene_14946	Induced during mycorrhization	V	NA	NA	GH92	Mannan	NA	NA	NA	NA	NA	PF07971	Glyco_hydro_92	NA	CAZyme	Glycoside Hydrolase	OG0001043	9.45656	8.43442	6.78912	45.7325	53.0624	49.0492	2.60263	0.00998525
Lacsan1|1816402	Lacsan1	1816402	gene_14668	Induced during mycorrhization	V	NA	NA	NA	NA	NA	NA	NA	1.14.14.1	Unspecific monooxygenase.	PF00067	p450	Secondary metabolites biosynthesis, transport and catabolism	Cytochrome p450		OG0005634	62.2621	81.572	66.9131	349.369	534.902	292.909	2.72687	0.0470852
Lacsan1|1843719	Lacsan1	1843719	gene_2603	Induced during mycorrhization	V	NA	NA	NA	NA	NA	NA	NA	NA	NA	NA	NA	Function unknown	Unknown	Unknown	OG0008643	149.101	116.695	64.5547	803.812	972.718	1423.98	3.37776	0.00248971
Lacsan1|1843857	Lacsan1	1843857	gene_2585	Induced during mycorrhization	V	NA	NA	GH3	NA	NA	NA	NA	3.2.1.21	Beta-glucosidase.	PF01915,PF00933,PF14310	Glyco_hydro_3_C,Glyco_hydro_3,Fn3-like	NA	CAZyme	Glycoside Hydrolase	OG0002732	7.2899	7.11785	8.29736	134.925	156.182	124.893	4.40298	6.16e-37
Lacsan1|1848783	Lacsan1	1848783	gene_6252	Induced during mycorrhization	V	NA	NA	NA	NA	NA	NA	NA	NA	NA	PF00155	Aminotran_1_2	Amino acid transport and metabolism	Other function	Aminotransferase	OG0010496	16.6264	11.357	12.7214	228.249	209.981	164.297	4.09	4.34e-24
Lacsan1|1849133	Lacsan1	1849133	gene_5455	Induced during mycorrhization	V	NA	NA	NA	NA	NA	NA	NA	NA	NA	PF00230	MIP	Carbohydrate transport and metabolism	Transporter/Permease	MIP	OG0005432	1.79723	1.23699	3.31912	1731.71	1407.9	1349	9.95407	1.74e-172
Lacsan1|1849924	Lacsan1	1849924	gene_5922	Induced during mycorrhization	V	NA	NA	NA	NA	NA	NA	NA	1.14.14.1	Unspecific monooxygenase.	PF00067	p450	Lipid transport and metabolism ; Secondary metabolites biosynthesis, transport and catabolism	Cytochrome p450		OG0001229	0	0.130772	0	11.1165	0.274482	9.31198	6.63863	0.00260561
Lacsan1|1852398	Lacsan1	1852398	gene_7626	Induced during mycorrhization	V	NA	NA	NA	NA	NA	NA	NA	NA	NA	PF02133	Transp_cyt_pur	Coenzyme transport and metabolism ; Nucleotide transport and metabolism	Transporter/Permease	Nucleobases transporter	OG0004636	2.42352	3.12907	4.62824	23.9154	22.4585	24.5746	2.93226	0.000254413
Lacsan1|1852525	Lacsan1	1852525	gene_7629	Induced during mycorrhization	V	NA	NA	NA	NA	NA	NA	NA	NA	NA	PF00403	HMA	Inorganic ion transport and metabolism	Other function	Holds a HMA domain	OG0006967	2.62555	1.06824	0	5.80403	6.26315	4.381	3.33189	6.18e-08
Lacsan1|1857563	Lacsan1	1857563	gene_12848	Induced during mycorrhization	V	NA	NA	GH16	Glucan	NA	NA	NA	NA	NA	NA	NA	NA	CAZyme	Glycoside Hydrolase	OG0008765	2.94723	2.02427	3.56352	79.8347	138.944	91.4605	5.70529	1.84e-41
Lacsan1|1889947	Lacsan1	1889947	gene_16470	Induced during mycorrhization	V	NA	NA	NA	NA	NA	NA	NA	3.6.-.-	Acting on acid anhydrides.	PF00069,PF07714	Pkinase,Pkinase_Tyr	NA	Other function	Tyrosine kinase	OG0010523	1.83995	2.12196	1.29544	15.823	11.6507	20.288	3.63864	7.6e-05
Lacsan1|1900789	Lacsan1	1900789	gene_908	Induced during mycorrhization	V	NA	NA	NA	NA	NA	NA	NA	NA	NA	PF02171,PF16488,PF16487,PF16486	Piwi,ArgoL2,ArgoMid,ArgoN	Translation, ribosomal structure and biogenesis	Other function	Piwi/argonaute	OG0016953	0.893747	0.952491	0.932192	11.8809	13.1806	11.5902	4.08749	2.37e-30
Lacsan1|1901435	Lacsan1	1901435	gene_1419	Induced during mycorrhization	V	NA	NA	NA	NA	NA	NA	NA	NA	NA	PF07690	MFS_1	Carbohydrate transport and metabolism	Transporter/Permease	Unknown transporter	OG0008054	26.5007	22.3641	18.9488	676.88	952.108	364.192	5.25664	1.57e-25
Lacsan1|1908577	Lacsan1	1908577	gene_10743	Induced during mycorrhization	V	NA	NA	NA	NA	NA	NA	NA	NA	NA	PF01794,PF08030,PF08022	Ferric_reduct,NAD_binding_6,FAD_binding_8	Inorganic ion transport and metabolism ; Secondary metabolites biosynthesis, transport and catabolism	Other function	Feric reductase	OG0004012	5.65919	7.75426	6.97926	70.7387	41.2609	89.1707	3.79095	1.52e-07
Lacsan1|1908637	Lacsan1	1908637	gene_9989	Induced during mycorrhization	V	Secreted	NA	NA	NA	NA	NA	NA	NA	NA	NA	NA	NA	Unknown	Unknown	OG0000149	3.57206	2.87616	2.80044	23.8377	23.0326	40.4736	3.32364	0.000194053
Lacsan1|1945765	Lacsan1	1945765	gene_5801	Induced during mycorrhization	V	NA	NA	NA	NA	NA	NA	NA	1.14.14.1	Unspecific monooxygenase.	PF00067	p450	Secondary metabolites biosynthesis, transport and catabolism	Cytochrome p450		OG0003464	10.2616	8.54863	19.9974	130.786	82.434	111.224	3.18925	0.0192723
Lacsan1|1957029	Lacsan1	1957029	gene_6406	Induced during mycorrhization	V	NA	NA	NA	NA	NA	NA	NA	NA	NA	PF02171,PF16486,PF08699,PF16488,PF02170,PF16487	Piwi,ArgoN,ArgoL1,ArgoL2,PAZ,ArgoMid	Translation, ribosomal structure and biogenesis	Other function	Piwi/argonaute	OG0008065	4.65657	3.20268	5.28558	25.4931	28.6386	35.8305	2.9118	0.0165434
Lacsan1|1958346	Lacsan1	1958346	gene_5949	Induced during mycorrhization	V	NA	NA	NA	NA	NA	NA	NA	1.14.14.1	Unspecific monooxygenase.	PF00067	p450	Lipid transport and metabolism ; Secondary metabolites biosynthesis, transport and catabolism	Cytochrome p450		OG0000185	0.873992	1.20658	1.60786	4.36683	6.40653	4.40678	2.8539	0.0379373
Lacsan1|1975817	Lacsan1	1975817	gene_9038	Induced during mycorrhization	V	NA	NA	NA	NA	NA	NA	NA	NA	NA	PF03641	Lysine_decarbox	NA	Other function	Lysine decarboxylase	OG0000780	2.76662	3.99044	4.3176	17.5446	21.3645	14.1246	3.39858	3.28e-06
Lacsan1|1997199	Lacsan1	1997199	gene_15366	Induced during mycorrhization	V	NA	NA	NA	NA	NA	NA	NA	NA	NA	PF00240,PF14560,PF11976	ubiquitin,Ubiquitin_2,Rad60-SLD	General function prediction only ; Posttranslational modification, protein turnover, chaperones	Other function	Ubiquitin	OG0007142	2.55331	3.95153	7.52119	40.8613	70.6266	25.3033	3.43965	0.0285967
Lacsan1|2007294	Lacsan1	2007294	gene_15019	Induced during mycorrhization	V	NA	NA	NA	NA	NA	NA	NA	4.3.1.12	Ornithine cyclodeaminase.	PF02423	OCD_Mu_crystall	Amino acid transport and metabolism	Other function	Ornithine cyclodeaminase.	OG0000181	1.59764	2.86777	2.15623	55.5657	56.0944	44.5036	4.22502	7.99e-08
Lacsan1|2029883	Lacsan1	2029883	gene_17414	Induced during mycorrhization	V	NA	NA	NA	NA	NA	NA	NA	4.3.1.12	Ornithine cyclodeaminase.	PF02423	OCD_Mu_crystall	Amino acid transport and metabolism	Other function	Ornithine cyclodeaminase.	OG0000181	10.1128	12.3068	11.7626	59.122	69.9416	61.4546	2.7232	0.00353166
Lacsan1|2031063	Lacsan1	2031063	gene_17748	Induced during mycorrhization	V	SSP	NA	NA	NA	NA	NA	NA	NA	NA	NA	NA	NA	Unknown	Unknown	OG0013409	5.46297	13.2568	4.26944	45.3711	32.1607	56.2191	3.26771	7.61e-05
Lacsan1|2063943	Lacsan1	2063943	gene_2624	Induced during mycorrhization	V	NA	NA	NA	NA	NA	NA	NA	NA	NA	NA	NA	NA	Unknown	Unknown	OG0006551	195.809	196.178	109.881	1951.34	2310.12	1417.56	3.73635	3.42e-09
Lacsan1|2064786	Lacsan1	2064786	gene_3598	Induced during mycorrhization	V	NA	NA	NA	NA	NA	NA	NA	NA	NA	PF07690	MFS_1	General function prediction only	Transporter/Permease	Unknown transporter	OG0017587	1.82936	1.71783	2.66415	19.1843	17.8655	18.3617	3.49643	1.51e-05
Lacsan1|2066461	Lacsan1	2066461	gene_5706	Induced during mycorrhization	V	NA	NA	NA	NA	NA	NA	NA	1.14.14.1	Unspecific monooxygenase.	PF00067	p450	Lipid transport and metabolism ; Secondary metabolites biosynthesis, transport and catabolism	Cytochrome p450		OG0000152	0.943546	1.77192	2.47704	86.584	35.6216	130.247	5.76541	6.19e-06
Lacsan1|2069650	Lacsan1	2069650	gene_9293	Induced during mycorrhization	V	Secreted	NA	NA	NA	NA	NA	NA	NA	NA	PF07470	Glyco_hydro_88	NA	Other function	Holds a GH88 domain	OG0008817	0.451647	0.397911	0.50477	22.4036	27.0001	17.8676	5.46612	1.83e-20
Lacsan1|2075409	Lacsan1	2075409	gene_11683	Induced during mycorrhization	V	NA	NA	NA	NA	NA	NA	NA	NA	NA	PF09994	DUF2235	NA	Unknown	Unknown	OG0010905	1.94575	1.22537	1.68203	15.0367	45.1859	16.1089	4.62076	2.08e-07
Lacsan1|2103859	Lacsan1	2103859	gene_17658	Induced during mycorrhization	V	NA	NA	NA	NA	NA	NA	NA	3.6.-.-	Acting on acid anhydrides.	PF00069,PF07714	Pkinase,Pkinase_Tyr	NA	Other function	Tyrosine kinase	OG0010523	0.950841	2.0287	0.978215	14.8249	12.4616	15.3942	3.73732	2.11e-05
Lacsan1|2111825	Lacsan1	2111825	gene_2667	Induced during mycorrhization	V	NA	NA	NA	NA	NA	NA	NA	NA	NA	PF00083,PF07690	Sugar_tr,MFS_1	General function prediction only	Transporter/Permease	Sugar transporter	OG0007392	5.45066	5.21783	5.80635	76.6637	102.114	55.7024	3.81854	2.04e-18
Lacsan1|2115045	Lacsan1	2115045	gene_10662	Induced during mycorrhization	V	NA	NA	NA	NA	NA	NA	NA	3.1.3.21	Glycerol-1-phosphatase.	PF13419,PF00702,PF13242	HAD_2,Hydrolase,Hydrolase_like	General function prediction only	Other function	Glycerol-1-phosphatase.	OG0001895	3.17523	3.5538	2.8876	67.9408	104.89	40.4134	5.2138	9.16e-32
Lacsan1|2125729	Lacsan1	2125729	gene_13700	Induced during mycorrhization	V	Secreted	NA	NA	NA	NA	NA	NA	3.4.24.-	Metalloendopeptidases.	PF02128,PF07504	Peptidase_M36,FTP	NA	Protease	Fungalysin (M36)	OG0000021	10.189	3.77583	7.08025	180.436	125.149	361.883	4.98362	1.55e-12
Lacsan1|2129722	Lacsan1	2129722	gene_13334	Induced during mycorrhization	V	Secreted	NA	NA	NA	NA	NA	NA	3.4.24.-	Metalloendopeptidases.	PF02128,PF07504	Peptidase_M36,FTP	NA	Protease	Fungalysin (M36)	OG0000021	11.996	9.28824	11.2862	148.412	104.421	263.546	3.92846	6.36e-07
Lacsan1|2154738	Lacsan1	2154738	gene_20447	Induced during mycorrhization	V	Secreted	NA	AA3_2	PartialPCWdegradation	NA	NA	NA	1.1.99.1	Choline dehydrogenase.	PF00732,PF05199	GMC_oxred_N,GMC_oxred_C	General function prediction only	CAZyme	GMC oxidoreductase	OG0000309	16.4892	14.3695	13.4968	68.1751	93.3318	132.383	3.82765	8.69e-07
Lacsan1|2189254	Lacsan1	2189254	gene_10994	Induced during mycorrhization	V	NA	NA	NA	NA	NA	NA	NA	2.5.1.39	4-hydroxybenzoate nonaprenyltransferase.	PF01040	UbiA	Coenzyme transport and metabolism	Other function	Holds a UbiA domain	OG0000374	9.17086	7.03913	8.63742	63.3772	63.6903	44.4114	2.78706	0.000819496
Lacsan1|2194684	Lacsan1	2194684	gene_2238	Induced during mycorrhization	V	NA	NA	NA	NA	NA	NA	NA	NA	NA	NA	NA	NA	Unknown	Unknown	OG0007720	104.279	75.2159	96.5985	521.781	457.144	513.202	2.7585	0.000324199
Lacsan1|2219825	Lacsan1	2219825	gene_5946	Induced during mycorrhization	V	Secreted	NA	NA	NA	NA	NA	NA	1.14.14.1	Unspecific monooxygenase.	PF00067	p450	Lipid transport and metabolism ; Secondary metabolites biosynthesis, transport and catabolism	Cytochrome p450		OG0000185	4.01797	3.91911	3.64309	117.576	152.5	120.989	5.14772	5.02e-76
Lacsan1|2220778	Lacsan1	2220778	gene_9406	Induced during mycorrhization	V	NA	NA	NA	NA	NA	NA	NA	1.1.1.65	Pyridoxine 4-dehydrogenase.	PF00248	Aldo_ket_red	Energy production and conversion	Other function	Aldo/keto reductase	OG0002207	0	0	0.592387	5.40105	5.00214	4.76544	4.4363	0.00158003
Lacsan1|2227891	Lacsan1	2227891	gene_4955	Induced during mycorrhization	V	NA	NA	GH18	Chitin	3c1__1E9L chi-lectin (TIM)	NA	NA	3.2.1.14	Chitinase.	PF00704	Glyco_hydro_18	Carbohydrate transport and metabolism	CAZyme	Glycoside Hydrolase	OG0000948	21.3698	17.7285	19.8932	315.526	352.272	551.837	4.5342	2.74e-21
Lacsan1|2231997	Lacsan1	2231997	gene_13859	Induced during mycorrhization	V	NA	NA	NA	NA	NA	NA	NA	NA	NA	PF00067	p450	Secondary metabolites biosynthesis, transport and catabolism	Cytochrome p450		OG0000043	0.331782	0.121912	0	101.908	73.6411	56.3297	8.56716	9.07e-45
Lacsan1|2232826	Lacsan1	2232826	gene_13325	Induced during mycorrhization	V	NA	NA	NA	NA	NA	NA	NA	NA	NA	PF13519,PF05879	VWA_2,RHD3	General function prediction only	Other function	RHD3	OG0002799	2.23022	2.13187	2.2149	19.3497	18.3644	9.64734	3.3607	6.79e-05
Lacsan1|2241340	Lacsan1	2241340	gene_4685	Induced during mycorrhization	V	NA	NA	NA	NA	NA	NA	NA	3.6.3.4	Copper-exporting ATPase.	PF00122,PF00702,PF12710,PF00403,PF08282	E1-E2_ATPase,Hydrolase,HAD,HMA,Hydrolase_3	Inorganic ion transport and metabolism	Other function	Hydrolase	OG0004449	1.50642	1.25749	1.8901	246.573	104.594	362.51	7.50117	4.32e-37
Lacsan1|269430	Lacsan1	269430	gene_15861	Induced during mycorrhization	V	NA	NA	NA	NA	NA	NA	NA	NA	NA	PF07690	MFS_1	Carbohydrate transport and metabolism	Transporter/Permease	Unknown transporter	OG0000581	1.73887	1.9894	1.03795	8.78504	25.8343	17.6095	4.077	1.8e-06
Lacsan1|295263	Lacsan1	295263	gene_14886	Induced during mycorrhization	V	NA	NA	NA	NA	NA	NA	NA	NA	NA	PF07690	MFS_1	Carbohydrate transport and metabolism	Transporter/Permease	Unknown transporter	OG0003669	2.01623	1.90026	1.87108	55.7727	112.487	38.4581	5.41663	6.46e-26
Lacsan1|326044	Lacsan1	326044	gene_5797	Induced during mycorrhization	V	Secreted	CAH17527|GGGX|abH03	NA	NA	NA	NA	NA	3.1.1.3	Triacylglycerol lipase.	PF00135	COesterase	Signal transduction mechanisms	Lipase	Triacylglycerol lipase.	OG0001427	2.55651	2.47628	2.42167	96.4178	184.002	65.5328	5.67399	1.36e-24
Lacsan1|339834	Lacsan1	339834	gene_17894	Induced during mycorrhization	V	Secreted	NA	GH47	NA	NA	NA	NA	3.2.1.113	Mannosyl-oligosaccharide 1,2-alpha-mannosidase.	PF01532	Glyco_hydro_47	Carbohydrate transport and metabolism	CAZyme	Glycoside Hydrolase	OG0002084	0.233414	0.421017	0.31282	6.78644	5.86771	4.53661	4.67928	4.13e-13
Lacsan1|386754	Lacsan1	386754	gene_15341	Induced during mycorrhization	V	Secreted	NA	GH47	NA	NA	NA	NA	3.2.1.113	Mannosyl-oligosaccharide 1,2-alpha-mannosidase.	PF01532	Glyco_hydro_47	Carbohydrate transport and metabolism	CAZyme	Glycoside Hydrolase	OG0002084	0.264175	0	0.642288	8.0496	5.75908	10.8935	4.94903	4.13e-17
Lacsan1|430172	Lacsan1	430172	gene_4811	Induced during mycorrhization	V	NA	NA	NA	NA	NA	NA	NA	NA	NA	PF00651	BTB	NA	Transcription factor	Holds a BTB domain	OG0009608	0.830442	0.272881	1.62647	8.90039	3.52529	11.5181	3.96753	0.019092
Lacsan1|550580	Lacsan1	550580	gene_6279	Induced during mycorrhization	V	NA	NA	AA3_3	PartialPCWdegradation	NA	NA	NA	1.1.3.13	Alcohol oxidase.	PF00732,PF05199	GMC_oxred_N,GMC_oxred_C	General function prediction only	CAZyme	Alcohol oxidase	OG0012672	0.757864	0.675756	0.904014	8.28806	4.38652	6.39401	3.1589	0.00172967
Lacsan1|700490	Lacsan1	700490	gene_5912	Induced during mycorrhization	V	NA	NA	NA	NA	NA	NA	NA	1.14.14.1	Unspecific monooxygenase.	PF00067	p450	Lipid transport and metabolism ; Secondary metabolites biosynthesis, transport and catabolism	Cytochrome p450		OG0000514	0.604462	0.887649	1.03501	54.1852	82.2244	58.3841	7.21002	2.65e-91
Lacsan1|701244	Lacsan1	701244	gene_5930	Induced during mycorrhization	V	NA	NA	NA	NA	NA	NA	NA	1.14.14.1	Unspecific monooxygenase.	PF00067	p450	Lipid transport and metabolism ; Secondary metabolites biosynthesis, transport and catabolism	Cytochrome p450		OG0000185	0.092583	0	0	7.61608	5.01644	8.77367	5.20394	6.58e-16
Lacsan1|701650	Lacsan1	701650	gene_5948	Induced during mycorrhization	V	NA	NA	NA	NA	NA	NA	NA	NA	NA	PF00067	p450	Lipid transport and metabolism ; Secondary metabolites biosynthesis, transport and catabolism	Cytochrome p450		OG0000185	0	0.576438	0.20055	4.34165	4.35438	4.23892	3.62295	0.00249251
Lacsan1|713714	Lacsan1	713714	gene_17417	Induced during mycorrhization	V	NA	NA	NA	NA	NA	NA	NA	4.3.1.12	Ornithine cyclodeaminase.	PF02423	OCD_Mu_crystall	Amino acid transport and metabolism	Other function	Ornithine cyclodeaminase.	OG0000181	2.72112	2.53619	1.89254	61.5692	60.7831	49.0066	3.95076	2.82e-12
Lacsan1|717535	Lacsan1	717535	gene_5522	Induced during mycorrhization	V	NA	NA	NA	NA	NA	NA	NA	NA	NA	PF11700,PF07690	ATG22,MFS_1	NA	Transporter/Permease	Amino acid or protein transporter	OG0001608	6.46603	6.68562	9.23906	89.2806	123.268	94.4604	4.01821	6.31e-29
Lacsan1|74413	Lacsan1	74413	gene_2987	Induced during mycorrhization	V	NA	NA	NA	NA	NA	NA	NA	NA	NA	PF16242,PF01243	Pyrid_ox_like,Putative_PNPOx	NA	Other function	Pyridoxamine 5'-phosphate oxidase like	OG0000762	2.62618	2.7256	2.66427	4.93514	1.96921	5.42127	3.80265	0.0109309
Lacsan1|860637	Lacsan1	860637	gene_7086	Induced during mycorrhization	V	NA	NA	GT8	NA	NA	NA	NA	2.4.1.186	Glycogenin glucosyltransferase.	PF01501	Glyco_transf_8	Carbohydrate transport and metabolism	CAZyme	Glycosyltransferase	OG0000479	20.9002	19.4744	29.334	124.364	102.701	128.236	2.83037	0.00260561
Lacsan1|876018	Lacsan1	876018	gene_8631	Induced during mycorrhization	V	Secreted	NA	NA	NA	NA	NA	NA	1.14.18.1	Monophenol monooxygenase.	PF00264	Tyrosinase	NA	Other function	Tyrosinase	OG0002206	11.1729	8.83084	9.29489	61.5733	61.2106	88.3716	3.38265	3.12e-11
Lacsan1|MSTRG.10675	Lacsan1	NA	MSTRG.10675	Induced during mycorrhization	V	NA	NA	NA	NA	NA	NA	NA	NA	NA	PF00933	Glyco_hydro_3	NA	Protease	gamma-glutamyl hydrolase (C26)	OG0009070	4.17486	4.01357	0	69.0362	85.3336	60.3557	4.10848	0.000454392
Lacsan1|MSTRG.12108	Lacsan1	NA	MSTRG.12108	Induced during mycorrhization	V	NA	NA	NA	NA	NA	NA	NA	NA	NA	PF08699	ArgoL1	NA	Other function	Piwi/argonaute	OG0009524	2.85586	2.79343	2.83261	30.8635	29.0832	23.7208	3.50109	2.79e-12
Lacsan1|MSTRG.8623	Lacsan1	NA	MSTRG.8623	Induced during mycorrhization	V	NA	CAH17527|GGGX|abH03	NA	NA	NA	NA	NA	NA	NA	NA	NA	NA	Lipase	Unknown lipase	OG0013064	1.46109	1.21075	1.77852	26.2763	51.7345	19.7331	6.09831	2.77e-16
Lacsan1|1117819	Lacsan1	1117819	gene_7558	Induced during mycorrhization	II	NA	NA	NA	NA	NA	NA	NA	NA	NA	NA	NA	NA	Unknown	Unknown	OG0010043	0.629761	1.00276	0.657935	12.7303	3.82524	14.4135	4.0382	0.0288036
Lacsan1|135222	Lacsan1	135222	gene_14265	Induced during mycorrhization	II	NA	NA	NA	NA	20c3__4Q56 H-type lectin	NA	NA	NA	NA	PF09458	H_lectin	NA	Lectin	H-type lectin	OG0000228	5.26999	5.06672	6.44898	287.534	34.9606	594.222	6.12869	0.00315981
Lacsan1|1472954	Lacsan1	1472954	gene_10790	Induced during mycorrhization	II	NA	NA	NA	NA	NA	NA	NA	NA	NA	NA	NA	NA	Unknown	Unknown	OG0010232	59.0578	47.3858	71.6506	470.161	444.157	484.499	3.17803	4.63e-08
Lacsan1|1493305	Lacsan1	1493305	gene_11272	Induced during mycorrhization	II	NA	NA	NA	NA	NA	NA	NA	NA	NA	NA	NA	NA	Unknown	Unknown	OG0001877	2.04232	2.99143	4.23137	30.3134	50.5614	26.1519	3.84462	1.74e-08
Lacsan1|1823642	Lacsan1	1823642	gene_10613	Induced during mycorrhization	II	NA	NA	NA	NA	NA	NA	NA	NA	NA	NA	NA	NA	Unknown	Unknown	OG0008528	33.7426	32.7132	47.5046	266.352	365.869	246.983	3.06438	5.52e-05
Lacsan1|1902460	Lacsan1	1902460	gene_3667	Induced during mycorrhization	II	NA	NA	NA	NA	NA	NA	NA	NA	NA	NA	NA	NA	Unknown	Unknown	OG0001821	5.18133	5.42415	5.18107	34.4213	25.5467	39.2583	3.05526	0.00116318
Lacsan1|1907466	Lacsan1	1907466	gene_9029	Induced during mycorrhization	II	NA	NA	NA	NA	NA	NA	NA	NA	NA	NA	NA	NA	Unknown	Unknown	OG0017078	0.308053	0.296015	0.336961	4.27031	4.67022	6.08753	4.49232	0.000863933
Lacsan1|1934796	Lacsan1	1934796	gene_3619	Induced during mycorrhization	II	SSP	NA	CBM50-CBM50	NA	NA	NA	NA	NA	NA	PF01476	LysM	NA	Other function	LysM	OG0000093	0	0.294192	0	3.81588	5.11864	3.28032	5.08785	0.0403832
Lacsan1|1934841	Lacsan1	1934841	gene_3626	Induced during mycorrhization	II	NA	NA	NA	NA	24c1__3QDY Fungal fruit body lectin	NA	NA	NA	NA	PF07367	FB_lectin	NA	Lectin	Fungal fruit body lectin	OG0000849	1.5677	1.32415	0.397166	78.2101	41.1192	218.492	6.6555	0.000270458
Lacsan1|1962164	Lacsan1	1962164	gene_7890	Induced during mycorrhization	II	NA	NA	NA	NA	NA	NA	NA	NA	NA	NA	NA	NA	Unknown	Unknown	OG0013360	2.59993	4.25861	2.44387	78.7905	40.6778	144.008	4.91523	7.03e-05
Lacsan1|1969426	Lacsan1	1969426	gene_7532	Induced during mycorrhization	II	NA	NA	NA	NA	24c1__3QDY Fungal fruit body lectin	NA	NA	NA	NA	PF07367	FB_lectin	NA	Lectin	Fungal fruit body lectin	OG0000299	91.2691	69.0885	150.873	4208.01	2697.78	2390.9	4.86828	2.58e-20
Lacsan1|1997377	Lacsan1	1997377	gene_12139	Induced during mycorrhization	II	NA	NA	NA	NA	24c1__3QDY Fungal fruit body lectin	NA	NA	NA	NA	PF07367	FB_lectin	NA	Lectin	Fungal fruit body lectin	OG0000849	2.89425	0.447817	1.92478	346.634	273.58	465.431	7.52508	1.71e-14
Lacsan1|2018453	Lacsan1	2018453	gene_15065	Induced during mycorrhization	II	NA	NA	NA	NA	NA	NA	NA	NA	NA	NA	NA	NA	Unknown	Unknown	OG0003284	3.02001	1.62187	2.13218	26.357	31.9531	11.895	3.50117	0.0112893
Lacsan1|2067348	Lacsan1	2067348	gene_5021	Induced during mycorrhization	II	NA	NA	NA	NA	NA	NA	NA	NA	NA	NA	NA	NA	Unknown	Unknown	OG0004880	12.4438	10.8006	10.9021	120.858	85.4554	146.881	3.54164	7.41e-07
Lacsan1|2080475	Lacsan1	2080475	gene_17408	Induced during mycorrhization	II	NA	NA	NA	NA	NA	NA	NA	NA	NA	NA	NA	NA	Unknown	Unknown	OG0001415	0.710174	0.334389	0.623953	11.8203	4.29726	10.9335	4.10948	0.0280488
Lacsan1|2234341	Lacsan1	2234341	gene_16134	Induced during mycorrhization	II	NA	NA	NA	NA	NA	NA	NA	NA	NA	NA	NA	NA	Unknown	Unknown	OG0001048	0.244347	0.822859	1.53155	11.4839	7.99587	10.8606	3.93257	0.00756488
Lacsan1|319964	Lacsan1	319964	gene_5699	Induced during mycorrhization	II	NA	NA	NA	NA	NA	NA	NA	NA	NA	NA	NA	NA	Unknown	Unknown	OG0013514	0.877683	0.985475	0.481835	11.1505	10.6421	11.484	3.59192	0.00337583
Lacsan1|417010	Lacsan1	417010	gene_4665	Induced during mycorrhization	II	NA	NA	NA	NA	NA	NA	NA	NA	NA	NA	NA	NA	Unknown	Unknown	OG0012321	3.41782	4.71617	5.2776	30.6932	20.7107	32.5963	3.36521	0.00977394
Lacsan1|571473	Lacsan1	571473	gene_5442	Induced during mycorrhization	II	NA	NA	NA	NA	NA	NA	NA	NA	NA	NA	NA	NA	Unknown	Unknown	OG0002149	0.537194	0	0.831666	172.252	153.223	221.297	9.5254	3.13e-34
Lacsan1|607996	Lacsan1	607996	gene_17657	Induced during mycorrhization	II	NA	NA	NA	NA	NA	NA	NA	NA	NA	NA	NA	NA	Unknown	Unknown	OG0000523	0	0	0	0	0.938857	1.18374	4.72518	0.0185345
Lacsan1|921597	Lacsan1	921597	gene_9937	Induced during mycorrhization	II	SSP	NA	NA	NA	NA	NA	NA	NA	NA	PF01822	WSC	Carbohydrate transport and metabolism ; Posttranslational modification, protein turnover, chaperones	Protease	Peptidase subfamily P2	OG0009592	1.81434	3.04394	2.2827	18.5973	26.0966	33.2523	4.42045	2.14e-14
Lacsan1|MSTRG.10003	Lacsan1	NA	MSTRG.10003	Induced during mycorrhization	II	SSP	NA	NA	NA	NA	NA	NA	NA	NA	NA	NA	NA	Unknown	Unknown	OG0000452	0	0.412082	0	107.762	284.328	130.985	9.27593	6.66e-05
Lacsan1|MSTRG.12098	Lacsan1	NA	MSTRG.12098	Induced during mycorrhization	II	NA	NA	NA	NA	NA	NA	NA	NA	NA	NA	NA	NA	Unknown	Unknown	OG0011154	2.35987	4.11603	7.77827	182.946	147.467	133.9	4.90414	1.78e-13
Lacsan1|MSTRG.12430	Lacsan1	NA	MSTRG.12430	Induced during mycorrhization	II	NA	116208038|GX|abH09	NA	NA	NA	NA	NA	NA	NA	PF00023,PF12796,PF13606,PF13637,PF13857	Ank,Ank_2,Ank_3,Ank_4,Ank_5	NA	Unknown	Inconsistent annotation	OG0011837	1.62805	1.42649	1.63458	15.9824	12.749	17.11	3.51638	2.29e-05
Lacsan1|MSTRG.12809	Lacsan1	NA	MSTRG.12809	Induced during mycorrhization	II	NA	NA	NA	NA	NA	NA	NA	NA	NA	NA	NA	NA	Unknown	Unknown	OG0011154	1.24493	1.87813	4.33711	128.586	93.5022	80.5622	5.66942	1.01e-07
Lacsan1|MSTRG.3310	Lacsan1	NA	MSTRG.3310	Induced during mycorrhization	II	NA	NA	NA	NA	NA	NA	NA	NA	NA	NA	NA	NA	Unknown	Unknown	OG0005769	5.51838	6.26285	5.77508	206.255	352.97	325.843	5.50963	3.37e-57
Lacsan1|MSTRG.3311	Lacsan1	NA	MSTRG.3311	Induced during mycorrhization	II	NA	116208038|GX|abH09	NA	NA	NA	NA	NA	NA	NA	PF00023,PF12796,PF13606,PF13637,PF13857	Ank,Ank_2,Ank_3,Ank_4,Ank_5	NA	Unknown	Inconsistent annotation	OG0018317	18.5582	16.9492	22.3218	99.4202	93.8872	147.106	2.92282	0.00881841
Lacsan1|MSTRG.7961	Lacsan1	NA	MSTRG.7961	Induced during mycorrhization	II	NA	NA	NA	NA	NA	NA	NA	NA	NA	NA	NA	NA	Other function	A28 related	OG0004508	3.18974	2.93593	3.25702	324.597	320.73	55.5785	6.34694	2.9e-08
Lacsan1|1138737	Lacsan1	1138737	gene_10215	Induced during mycorrhization	III	NA	NA	NA	NA	NA	NA	NA	NA	NA	PF07690,PF00083	MFS_1,Sugar_tr	General function prediction only	Transporter/Permease	Sugar transporter	OG0003456	1.11072	1.62489	0.519227	42.3242	63.5137	26.22	5.55537	2.69e-22
Lacsan1|1470317	Lacsan1	1470317	gene_10744	Induced during mycorrhization	III	NA	NA	NA	NA	NA	NA	NA	NA	NA	PF00248	Aldo_ket_red	Energy production and conversion	Other function	Aldo/keto reductase	OG0000243	0.418055	0.254935	4.40847	111.704	75.7497	213.557	6.41893	0.000888869
Lacsan1|1472876	Lacsan1	1472876	gene_10789	Induced during mycorrhization	III	NA	NA	NA	NA	NA	NA	NA	NA	NA	PF08740,PF00004	BCS1_N,AAA	Posttranslational modification, protein turnover, chaperones	Other function	BCS1	OG0005542	9.65455	8.65559	10.6088	92.4806	70.8142	74.696	3.08338	3.37e-05
Lacsan1|1507526	Lacsan1	1507526	gene_13279	Induced during mycorrhization	III	NA	NA	NA	NA	NA	NA	NA	NA	NA	PF14613	DUF4449	NA	Unknown	Unknown	OG0004231	1.38972	2.13604	1.7733	32.4066	11.2551	26.7814	3.87352	8.14e-05
Lacsan1|1842420	Lacsan1	1842420	gene_1985	Induced during mycorrhization	III	NA	NA	NA	NA	NA	NA	NA	5.2.1.8	Peptidylprolyl isomerase.	PF00254	FKBP_C	Posttranslational modification, protein turnover, chaperones	Other function	Peptidylprolyl isomerase.	OG0007300	27.6903	34.7653	30.3717	844.668	168.345	883.924	4.34861	0.0360865
Lacsan1|1843093	Lacsan1	1843093	gene_1490	Induced during mycorrhization	III	NA	NA	NA	NA	NA	NA	NA	NA	NA	PF01937	DUF89	Function unknown	Unknown	Unknown	OG0006306	7.98359	14.6476	8.44652	378.498	144.727	986.463	5.85482	0.000195208
Lacsan1|1845985	Lacsan1	1845985	gene_3259	Induced during mycorrhization	III	NA	NA	NA	NA	NA	NA	NA	NA	NA	PF09729	Gti1_Pac2	Carbohydrate transport and metabolism ; Signal transduction mechanisms	Other function	Holds a Gti1_Pac2 domain	OG0002619	16.7892	16.2075	17.38	177.614	172.387	121.969	3.60689	3.58e-09
Lacsan1|1846510	Lacsan1	1846510	gene_4382	Induced during mycorrhization	III	NA	NA	NA	NA	NA	NA	NA	NA	NA	NA	NA	NA	Unknown	Unknown	OG0005531	6.29211	8.08161	11.6991	458.337	122.773	425.105	5.28074	2.44e-05
Lacsan1|1846641	Lacsan1	1846641	gene_6107	Induced during mycorrhization	III	NA	NA	NA	NA	NA	NA	NA	NA	NA	PF00249,PF13921	Myb_DNA-binding,Myb_DNA-bind_6	NA	Transcription factor	Putative transcription factor	OG0004734	52.1414	57.9255	59.273	1363.2	854.415	818.58	4.31138	4.37e-23
Lacsan1|1882141	Lacsan1	1882141	gene_6101	Induced during mycorrhization	III	NA	NA	GT35	NA	NA	NA	NA	2.4.1.1	Phosphorylase.	PF00343	Phosphorylase	Carbohydrate transport and metabolism	CAZyme	Glycosyltransferase	OG0007523	71.2909	70.4445	75.1432	1499.95	1262.4	715.812	4.32838	1.69e-19
Lacsan1|1888836	Lacsan1	1888836	gene_10736	Induced during mycorrhization	III	NA	NA	AA5_1	PartialPCWdegradation	NA	NA	NA	1.1.3.9	Galactose oxidase.	PF07250,PF01822,PF09118	Glyoxal_oxid_N,WSC,DUF1929	Carbohydrate transport and metabolism ; Posttranslational modification, protein turnover, chaperones	CAZyme	Copper radical oxidase	OG0000906	3.42171	2.77897	4.09643	18.0527	20.6658	21.2637	2.69455	0.0345756
Lacsan1|1890502	Lacsan1	1890502	gene_12127	Induced during mycorrhization	III	NA	NA	NA	NA	NA	NA	NA	NA	NA	PF00083,PF07690	Sugar_tr,MFS_1	General function prediction only	Transporter/Permease	Sugar transporter	OG0004100	20.8108	24.3134	24.1567	2889.92	3210.47	2501.36	7.0449	2.04e-271
Lacsan1|1893127	Lacsan1	1893127	gene_15933	Induced during mycorrhization	III	Secreted	NA	AA1_1	Phenols	NA	NA	NA	1.10.3.3	L-ascorbate oxidase.	PF00394,PF07731,PF07732	Cu-oxidase,Cu-oxidase_2,Cu-oxidase_3	Secondary metabolites biosynthesis, transport and catabolism	CAZyme	Laccase	OG0004422	2.5466	3.00391	2.54063	7.52123	9.17543	10.5784	2.89088	0.00115846
Lacsan1|1919012	Lacsan1	1919012	gene_216	Induced during mycorrhization	III	NA	NA	NA	NA	NA	NA	NA	3.4.24.56	Insulysin.	PF16187,PF00675,PF05193	Peptidase_M16_M,Peptidase_M16,Peptidase_M16_C	Posttranslational modification, protein turnover, chaperones	Protease	Pitrilysin (M16)	OG0007999	45.5246	51.2671	49.4069	310.419	480.794	498.066	3.29796	2.84e-07
Lacsan1|1920888	Lacsan1	1920888	gene_573	Induced during mycorrhization	III	NA	NA	NA	NA	NA	NA	NA	NA	NA	PF08635,PF01408	ox_reductase_C,GFO_IDH_MocA	NA	Other function	glucose--fructose oxidoreductase	OG0005698	90.8272	101.589	122.337	1048.06	1489.52	973.77	3.74844	4.61e-18
Lacsan1|1926297	Lacsan1	1926297	gene_2076	Induced during mycorrhization	III	NA	NA	NA	NA	NA	NA	NA	NA	NA	PF04082	Fungal_trans	NA	Transcription factor	Fungal specific transcription factor domain	OG0006234	47.9588	53.5162	47.7148	254.048	202.962	307.121	2.88668	0.00139337
Lacsan1|1926777	Lacsan1	1926777	gene_2161	Induced during mycorrhization	III	NA	NA	NA	NA	NA	NA	NA	NA	NA	PF12585	DUF3759	NA	Unknown	Unknown	OG0002916	10.5275	10.9284	13.1993	103.416	239.563	81.2246	5.82055	3.46e-06
Lacsan1|1949027	Lacsan1	1949027	gene_4794	Induced during mycorrhization	III	NA	NA	NA	NA	NA	NA	NA	5.5.1.4	Myo-inositol-1-phosphate synthase.	PF07994,PF01658	NAD_binding_5,Inos-1-P_synth	Lipid transport and metabolism	Other function	Myo-inositol-1-phosphate synthase.	OG0003146	16.7631	29.629	36.2371	204.804	267.187	212.906	3.35779	1.09e-05
Lacsan1|1971598	Lacsan1	1971598	gene_7775	Induced during mycorrhization	III	NA	NA	NA	NA	NA	NA	NA	2.7.4.6	Nucleoside-diphosphate kinase.	PF00334	NDK	Nucleotide transport and metabolism	Other function	Nucleoside-diphosphate kinase.	OG0008208	20.6894	29.9883	36.6525	196.554	188.186	171.868	3.22243	3.49e-06
Lacsan1|1976889	Lacsan1	1976889	gene_12777	Induced during mycorrhization	III	NA	NA	NA	NA	NA	NA	NA	2.2.1.1	Transketolase.	PF00456,PF02780	Transketolase_N,Transketolase_C	Carbohydrate transport and metabolism	Other function	Transketolase.	OG0007067	14.8781	14.5934	17.3594	110.593	115.927	115.9	3.10861	1.12e-07
Lacsan1|2024743	Lacsan1	2024743	gene_15752	Induced during mycorrhization	III	NA	NA	NA	NA	NA	NA	NA	NA	NA	PF00248	Aldo_ket_red	General function prediction only	Other function	Aldo/keto reductase	OG0009509	10.6397	14.1549	15.3551	106.742	82.5158	127.341	3.17837	4.41e-05
Lacsan1|2031038	Lacsan1	2031038	gene_17744	Induced during mycorrhization	III	NA	NA	NA	NA	NA	NA	NA	NA	NA	PF00701	DHDPS	NA	Other function	Holds a DHDPS domain	OG0003604	12.5693	12.371	13.7525	86.7846	69.2068	91.9418	3.08833	1.11e-05
Lacsan1|2065680	Lacsan1	2065680	gene_4281	Induced during mycorrhization	III	NA	NA	NA	NA	NA	NA	NA	2.7.7.9	UTP--glucose-1-phosphate uridylyltransferase.	PF01704	UDPGP	Carbohydrate transport and metabolism	Other function	UTP--glucose-1-phosphate uridylyltransferase.	OG0007832	201.88	229.157	204.038	2143.1	3100.96	1539.52	3.55992	5.1e-10
Lacsan1|2073974	Lacsan1	2073974	gene_12677	Induced during mycorrhization	III	NA	NA	NA	NA	NA	NA	NA	NA	NA	PF00067	p450	Secondary metabolites biosynthesis, transport and catabolism	Cytochrome p450		OG0000138	3.78133	2.36088	2.95732	21.1173	17.1947	16.3319	2.81334	0.00336954
Lacsan1|2075295	Lacsan1	2075295	gene_15547	Induced during mycorrhization	III	NA	NA	NA	NA	NA	NA	NA	NA	NA	PF00248	Aldo_ket_red	Energy production and conversion	Other function	Aldo/keto reductase	OG0000243	1.59312	3.39759	3.4071	84.7725	64.1083	169.635	5.99358	2.3e-19
Lacsan1|2080629	Lacsan1	2080629	gene_20644	Induced during mycorrhization	III	NA	NA	NA	NA	NA	NA	NA	NA	NA	PF08240,PF00107,PF16912	ADH_N,ADH_zinc_N,Glu_dehyd_C	Secondary metabolites biosynthesis, transport and catabolism	Other function	Glucose dehydrogenase	OG0003109	57.1355	58.2614	50.916	571.956	589.15	622.007	3.65707	1.18e-18
Lacsan1|2101644	Lacsan1	2101644	gene_11951	Induced during mycorrhization	III	NA	NA	NA	NA	NA	NA	NA	NA	NA	PF00248	Aldo_ket_red	Energy production and conversion	Other function	Aldo/keto reductase	OG0007655	3.34811	4.90664	3.24098	14.7332	28.463	18.6932	2.72372	0.00379978
Lacsan1|2110919	Lacsan1	2110919	gene_819	Induced during mycorrhization	III	NA	NA	NA	NA	NA	NA	NA	NA	NA	PF13520,PF00324	AA_permease_2,AA_permease	Amino acid transport and metabolism	Transporter/Permease	Amino acid permease	OG0004592	5.36078	5.37283	6.1108	28.4971	38.9556	22.4628	2.69516	0.0478276
Lacsan1|2113456	Lacsan1	2113456	gene_4881	Induced during mycorrhization	III	NA	NA	NA	NA	NA	NA	NA	NA	NA	PF08240,PF00107,PF16912	ADH_N,ADH_zinc_N,Glu_dehyd_C	Secondary metabolites biosynthesis, transport and catabolism	Other function	Glucose dehydrogenase	OG0003109	111.311	215.391	246.823	1672.64	1498.16	1955.47	3.23471	1.38e-07
Lacsan1|2113908	Lacsan1	2113908	gene_5577	Induced during mycorrhization	III	NA	NA	NA	NA	NA	NA	NA	3.6.1.19	Nucleoside-triphosphate pyrophosphatase.	PF01725	Ham1p_like	Nucleotide transport and metabolism	Other function	Ham1p_like	OG0011132	2.73635	3.00207	1.09342	26.6133	33.5689	39.1246	5.93872	4.91e-36
Lacsan1|2144706	Lacsan1	2144706	gene_766	Induced during mycorrhization	III	NA	NA	CBM48-GH13_8	Starch/Glycogen	NA	NA	NA	2.4.1.18	1,4-alpha-glucan branching enzyme.	PF02806,PF00128,PF02922	Alpha-amylase_C,Alpha-amylase,CBM_48	Carbohydrate transport and metabolism	CAZyme	Glycoside Hydrolase	OG0007492	24.6828	23.1386	26.48	851.997	171.484	1650.81	5.60835	0.00122242
Lacsan1|2195101	Lacsan1	2195101	gene_2345	Induced during mycorrhization	III	NA	NA	NA	NA	NA	NA	NA	NA	NA	PF03936	Terpene_synth_C	NA	Other function	Terpene synthase	OG0001473	0.294328	0.723264	0.24562	16.6914	6.48446	16.898	7.32377	2.72e-09
Lacsan1|2221082	Lacsan1	2221082	gene_10354	Induced during mycorrhization	III	NA	NA	NA	NA	NA	NA	NA	1.14.11.13	Gibberellin 2-beta-dioxygenase.	PF14226,PF03171	DIOX_N,2OG-FeII_Oxy	General function prediction only ; Secondary metabolites biosynthesis, transport and catabolism	Other function	Gibberellin 2-beta-dioxygenase.	OG0005538	8.75948	15.7469	16.1956	131.993	119.537	106.56	3.35847	2.13e-07
Lacsan1|2242959	Lacsan1	2242959	gene_9926	Induced during mycorrhization	III	NA	NA	NA	NA	NA	NA	NA	NA	NA	PF00083,PF07690	Sugar_tr,MFS_1	General function prediction only	Transporter/Permease	Sugar transporter	OG0003841	58.8439	49.3953	57.3715	341.024	250.451	317.964	3.03024	1.92e-07
Lacsan1|544988	Lacsan1	544988	gene_1296	Induced during mycorrhization	III	NA	NA	NA	NA	NA	NA	NA	5.2.1.8	Peptidylprolyl isomerase.	PF00254	FKBP_C	Posttranslational modification, protein turnover, chaperones	Other function	Peptidylprolyl isomerase.	OG0005240	17.5297	13.2	13.7028	201.439	40.5038	234.125	6.05985	3.39e-05
Lacsan1|MSTRG.14301	Lacsan1	NA	MSTRG.14301	Induced during mycorrhization	III	NA	NA	NA	NA	NA	NA	NA	NA	NA	NA	NA	NA	Protease	Ulp1endopeptidase (C48)	OG0001765	28.967	28.8135	31.3066	376.837	104.75	496.258	4.53349	0.0130915
Lacsan1|1844118	Lacsan1	1844118	gene_4476	Induced during mycorrhization	VI	Secreted	NA	NA	NA	NA	NA	NA	NA	NA	PF12222	PNGaseA	NA	Other function	PNGaseA	OG0000024	1.04719	0.802622	1.14299	5.18293	10.0491	7.81017	3.43349	0.000356947
Lacsan1|1844152	Lacsan1	1844152	gene_4578	Induced during mycorrhization	VI	NA	NA	NA	NA	NA	NA	NA	NA	NA	NA	NA	NA	Unknown	Unknown	OG0009721	3.29238	3.59924	2.32305	125.1	113.548	144.765	5.44097	4.39e-23
Lacsan1|1847478	Lacsan1	1847478	gene_5777	Induced during mycorrhization	VI	NA	NA	NA	NA	NA	NA	NA	NA	NA	PF03795	YCII	NA	Other function	Holds a YCII domain	OG0007133	8.08461	26.3882	7.65581	46.8212	0	54.1239	3.43749	4.23e-07
Lacsan1|1878053	Lacsan1	1878053	gene_1240	Induced during mycorrhization	VI	SSP	NA	NA	NA	NA	NA	NA	NA	NA	PF05572,PF13688	Peptidase_M43,Reprolysin_5	NA	Protease	Cytophagalysin (M43)	OG0006185	0.715104	0.821616	1.14159	31.6975	42.5398	68.1689	6.88807	7.13e-32
Lacsan1|1888920	Lacsan1	1888920	gene_10804	Induced during mycorrhization	VI	NA	NA	NA	NA	NA	NA	NA	NA	NA	PF13649,PF13847,PF08241,PF13489,PF08242	Methyltransf_25,Methyltransf_31,Methyltransf_11,Methyltransf_23,Methyltransf_12	NA	Other function	Methyltransferase	OG0004494	9.91231	7.73491	8.43742	92.876	72.4839	139.338	4.33984	1.81e-14
Lacsan1|2013154	Lacsan1	2013154	gene_17909	Induced during mycorrhization	VI	NA	NA	NA	NA	NA	NA	NA	NA	NA	PF07859	Abhydrolase_3	Defense mechanisms	Other function	Abhydrolase	OG0001408	6.31187	6.01681	6.1585	25.8948	25.794	51.2263	2.94172	0.0429118
Lacsan1|2077521	Lacsan1	2077521	gene_15328	Induced during mycorrhization	VI	NA	NA	NA	NA	NA	NA	NA	NA	NA	PF07859	Abhydrolase_3	Defense mechanisms	Other function	Abhydrolase	OG0001408	9.9025	11.9485	10.2214	77.5897	51.5373	87.1985	3.24406	1.06e-06
Lacsan1|2118485	Lacsan1	2118485	gene_22897	Induced during mycorrhization	VI	NA	NA	NA	NA	NA	NA	NA	NA	NA	PF12697,PF00561	Abhydrolase_6,Abhydrolase_1	NA	Other function	Abhydrolase	OG0001798	0	0.67188	0.80965	31.7528	26.0178	28.4908	5.92148	1.37e-16
Lacsan1|2150382	Lacsan1	2150382	gene_6853	Induced during mycorrhization	VI	Secreted	NA	NA	NA	NA	NA	NA	3.4.24.-	Metalloendopeptidases.	PF02128,PF07504	Peptidase_M36,FTP	NA	Protease	Fungalysin (M36)	OG0002152	0.852183	1.31226	0.900555	23.0341	38.7726	23.5869	4.77171	1.04e-26
Lacsan1|2205209	Lacsan1	2205209	gene_3575	Induced during mycorrhization	VI	NA	NA	NA	NA	NA	NA	NA	NA	NA	PF00248	Aldo_ket_red	Energy production and conversion	Other function	Aldo/keto reductase	OG0003644	16.4313	15.262	19.3374	115.774	112.856	100.624	3.2474	9.22e-12
Lacsan1|2219799	Lacsan1	2219799	gene_6494	Induced during mycorrhization	VI	Secreted	NA	NA	NA	NA	NA	NA	3.4.24.-	Metalloendopeptidases.	PF02128,PF07504	Peptidase_M36,FTP	NA	Protease	Fungalysin (M36)	OG0000402	4.32916	4.28797	4.31242	40.3637	32.5888	31.2435	3.3397	1.95e-13
Lacsan1|2225844	Lacsan1	2225844	gene_4490	Induced during mycorrhization	VI	Secreted	NA	NA	NA	NA	NA	NA	NA	NA	PF12222	PNGaseA	NA	Other function	PNGaseA	OG0000024	0.330588	0.844938	0.622437	22.0822	34.0645	23.4941	5.47008	8.78e-30
Lacsan1|263051	Lacsan1	263051	gene_14128	Induced during mycorrhization	VI	NA	NA	NA	NA	NA	NA	NA	NA	NA	PF12697,PF00561	Abhydrolase_6,Abhydrolase_1	NA	Other function	Abhydrolase	OG0001798	0	0	0	3.4774	3.20378	5.37199	7.49307	0.000966686
Lacsan1|592679	Lacsan1	592679	gene_6858	Induced during mycorrhization	VI	Secreted	NA	NA	NA	NA	NA	NA	3.4.24.-	Metalloendopeptidases.	PF02128,PF07504	Peptidase_M36,FTP	NA	Protease	Fungalysin (M36)	OG0000402	7.47019	7.75328	7.72352	45.9355	41.4904	38.5125	2.58941	0.00301777
Lacsan1|685928	Lacsan1	685928	gene_6479	Induced during mycorrhization	VI	NA	NA	NA	NA	NA	NA	NA	3.4.24.-	Metalloendopeptidases.	PF02128	Peptidase_M36	NA	Protease	Fungalysin (M36)	OG0002152	0.650016	0.096463	0.480252	23.903	39.275	28.9709	5.79346	1.9e-39
Lacsan1|685954	Lacsan1	685954	gene_6480	Induced during mycorrhization	VI	Secreted	NA	NA	NA	NA	NA	NA	3.4.24.-	Metalloendopeptidases.	PF02128,PF07504	Peptidase_M36,FTP	NA	Protease	Fungalysin (M36)	OG0005781	0	0	0	0.515756	1.02425	1.01539	4.68906	0.0478276
Lacsan1|1912250	Lacsan1	1912250	gene_15616	Induced during mycorrhization	I	NA	NA	NA	NA	NA	NA	NA	NA	NA	NA	NA	NA	Unknown	Unknown	OG0017179	0.510482	1.98224	3.19384	38.8428	45.9961	25.8816	5.41968	1.56e-18
Lacsan1|1920661	Lacsan1	1920661	gene_532	Induced during mycorrhization	I	NA	NA	NA	NA	NA	NA	NA	NA	NA	NA	NA	NA	Unknown	Unknown	OG0000030	15.163	15.8255	18.188	278.581	198.902	55.6162	3.62384	0.00495205
Lacsan1|1927010	Lacsan1	1927010	gene_1350	Induced during mycorrhization	I	NA	NA	NA	NA	NA	NA	NA	NA	NA	NA	NA	NA	Unknown	Unknown	OG0017272	1.72421	0	5.09505	5597.07	977.069	7459.76	11.5767	2.33e-11
Lacsan1|1968176	Lacsan1	1968176	gene_8743	Induced during mycorrhization	I	NA	NA	NA	NA	NA	NA	NA	NA	NA	NA	NA	NA	Unknown	Unknown	OG0000452	0.989473	1.09478	0.443976	244.368	589.736	294.916	6.58416	0.022105
Lacsan1|2014665	Lacsan1	2014665	gene_14491	Induced during mycorrhization	I	NA	NA	NA	NA	NA	NA	NA	NA	NA	NA	NA	NA	Unknown	Unknown	OG0017510	1.59218	3.19388	4.23286	27.9836	28.1888	19.5344	3.33236	0.0126432
Lacsan1|2074234	Lacsan1	2074234	gene_13826	Induced during mycorrhization	I	NA	NA	NA	NA	NA	NA	NA	NA	NA	NA	NA	NA	Unknown	Unknown	OG0000030	0	0	0	1.3758	1.38268	1.42848	6.35329	0.0449127
Lacsan1|2077225	Lacsan1	2077225	gene_17892	Induced during mycorrhization	I	NA	NA	NA	NA	NA	NA	NA	NA	NA	NA	NA	NA	Unknown	Unknown	OG0017676	35.8144	32.9606	51.4625	254.363	197.076	337.092	3.43397	0.000430423
Lacsan1|2242300	Lacsan1	2242300	gene_5573	Induced during mycorrhization	I	NA	NA	NA	NA	NA	NA	NA	NA	NA	NA	NA	NA	Unknown	Unknown	OG0010587	0.165376	0	0.251906	5.93626	7.63573	4.15182	3.8877	0.0162216
Lacsan1|611106	Lacsan1	611106	gene_16752	Induced during mycorrhization	I	NA	NA	NA	NA	NA	NA	NA	NA	NA	NA	NA	NA	Unknown	Unknown	OG0017998	31.9914	0	47.4038	201.303	79.317	133.437	3.6539	0.000216179
Lacsan1|739950	Lacsan1	739950	gene_17747	Induced during mycorrhization	I	NA	NA	NA	NA	NA	NA	NA	NA	NA	NA	NA	NA	Unknown	Unknown	OG0018026	9.30978	6.96152	19.6909	148.001	106.898	93.525	3.5362	5.29e-05
Lacsan1|MSTRG.10791	Lacsan1	NA	MSTRG.10791	Induced during mycorrhization	I	NA	NA	NA	NA	NA	NA	NA	NA	NA	NA	NA	NA	Unknown	Unknown	OG0018133	2.5615	3.98182	2.98907	30.2218	0	98.1325	5.4551	9.04e-17
Lacsan1|MSTRG.7192	Lacsan1	NA	MSTRG.7192	Induced during mycorrhization	I	NA	NA	NA	NA	NA	NA	NA	NA	NA	NA	NA	NA	Unknown	Unknown	OG0018416	15.1915	16.1939	14.5329	103.169	121.351	113.001	2.81315	6.63e-05
Lacsan1|MSTRG.7464	Lacsan1	NA	MSTRG.7464	Induced during mycorrhization	I	NA	NA	NA	NA	NA	NA	NA	NA	NA	NA	NA	NA	Unknown	Unknown	OG0005769	0.445087	0.809479	0.551758	205.751	629.529	411.694	10.5643	4.03e-69
Lacsan1|MSTRG.8320	Lacsan1	NA	MSTRG.8320	Induced during mycorrhization	I	NA	NA	NA	NA	NA	NA	NA	NA	NA	NA	NA	NA	Unknown	Unknown	OG0018441	3.02686	4.08874	3.26632	21.5073	20.8801	21.3385	4.27088	9.62e-20
Lacsan1|MSTRG.9967	Lacsan1	NA	MSTRG.9967	Induced during mycorrhization	I	NA	NA	NA	NA	NA	NA	NA	NA	NA	NA	NA	NA	Unknown	Unknown	OG0018496	17.8409	19.0088	20.7526	26.4182	27.6336	24.4161	3.10068	6.21e-07
Lacsan1|MSTRG.10153	Lacsan1	NA	MSTRG.10153	Induced during mycorrhization	NA	NA	NA	NA	NA	NA	NA	NA	NA	NA	NA	NA	NA	Unknown	Unknown	NA	2.12651	2.8275	2.98845	15.116	23.2414	13.7042	3.14265	0.0113494
Lacsan1|MSTRG.11026	Lacsan1	NA	MSTRG.11026	Induced during mycorrhization	NA	NA	NA	NA	NA	NA	NA	NA	NA	NA	NA	NA	NA	Unknown	Unknown	NA	267.022	294.579	338.874	1693.64	1756.48	1742.53	2.73022	7.82e-05
Lacsan1|MSTRG.1444	Lacsan1	NA	MSTRG.1444	Induced during mycorrhization	NA	NA	NA	NA	NA	NA	NA	NA	NA	NA	NA	NA	NA	Unknown	Unknown	NA	0.532377	0.928438	0.783754	26.0532	12.3651	17.4802	4.36841	2.37e-08
Lacsan1|MSTRG.14769	Lacsan1	NA	MSTRG.14769	Induced during mycorrhization	NA	NA	NA	NA	NA	NA	NA	NA	NA	NA	NA	NA	NA	Unknown	Unknown	NA	4.13912	4.12227	5.98317	37.5571	20.8555	47.1458	3.23474	0.0282679
Lacsan1|MSTRG.15101	Lacsan1	NA	MSTRG.15101	Induced during mycorrhization	NA	NA	NA	NA	NA	NA	NA	NA	NA	NA	NA	NA	NA	Unknown	Unknown	NA	1.80362	0.679945	0	0	0	12293.3	13.4452	5.58e-180
Lacsan1|MSTRG.2901	Lacsan1	NA	MSTRG.2901	Induced during mycorrhization	NA	NA	NA	NA	NA	NA	NA	NA	NA	NA	NA	NA	NA	Unknown	Unknown	NA	0.929051	0.26843	2.23284	0	13.5661	12.1835	3.64843	0.000524004
Lacsan1|MSTRG.3308	Lacsan1	NA	MSTRG.3308	Induced during mycorrhization	NA	NA	NA	NA	NA	NA	NA	NA	NA	NA	NA	NA	NA	Unknown	Unknown	NA	0	0	0	10.4518	3.70079	7.8594	8.95193	3.28e-06
Lacsan1|MSTRG.3681	Lacsan1	NA	MSTRG.3681	Induced during mycorrhization	NA	NA	NA	NA	NA	NA	NA	NA	NA	NA	NA	NA	NA	Unknown	Unknown	NA	0	0	0	2.8165	1.51954	1.68706	7.63251	0.00248971
Lacsan1|MSTRG.6606	Lacsan1	NA	MSTRG.6606	Induced during mycorrhization	NA	NA	NA	NA	NA	NA	NA	NA	NA	NA	NA	NA	NA	Unknown	Unknown	NA	20.539	13.4734	21.2425	262.958	252.851	261.173	3.0368	1.09e-05
Lacsan1|MSTRG.7333	Lacsan1	NA	MSTRG.7333	Induced during mycorrhization	NA	NA	NA	NA	NA	NA	NA	NA	NA	NA	NA	NA	NA	Unknown	Unknown	NA	0.486874	0.446262	0.319921	10.9672	14.9607	7.73099	4.24349	1.48e-08
Lacsan1|MSTRG.8663	Lacsan1	NA	MSTRG.8663	Induced during mycorrhization	NA	NA	NA	NA	NA	NA	NA	NA	NA	NA	NA	NA	NA	Unknown	Unknown	NA	16.9257	14.2864	12.6424	9869.7	6623.54	9748.18	9.65721	6.15e-241
Lacsan1|MSTRG.9272	Lacsan1	NA	MSTRG.9272	Induced during mycorrhization	NA	NA	NA	NA	NA	NA	NA	NA	NA	NA	NA	NA	NA	Unknown	Unknown	NA	1.50073	1.6299	1.16824	8.14795	11.2822	12.5002	3.87738	3.43e-05
Lacsan1|MSTRG.9311	Lacsan1	NA	MSTRG.9311	Induced during mycorrhization	NA	NA	NA	NA	NA	NA	NA	NA	NA	NA	NA	NA	NA	Unknown	Unknown	NA	0.788599	0.603539	0.821605	17.5657	13.6052	9.23483	4.77415	2.06e-11

## Sheet: Sheet S3D - L.vividus
Gene ID (this study)	JGI species ID	JGI protein ID	JGI gene ID	Gene regulation (genes are considered as differentially expressed if LFC > 2 or <-2 and p.value adjusted < 0.05)	Cluster in supplementary Figure S7	Secretion	Lipase	CAZyme family	CAZyme_substrate. PCW: Plant cell wall degrading enzyme.	Lectin	Subtilase family	Subtilase conservation. Subtilase missing one of their three catalytic regions were labelled as partial. If at least one of the catalytic region lack a perfect match to the pattern described in the litterature, the subtilase was labelled as containing a non-canonical region.	Enzyme Commission number	Enzyme Commission number description	PFAM domain ID	PFAM domain short description	KOG annotation	Highlighted functions	Highlighted functions additionnal details	Orthogroup ID	expression (TPM) in sample 141ct1 (FLM)	expression (TPM) in sample 141ct2 (FLM)	expression (TPM) in sample 141ct3 (FLM)	expression (TPM) in sample 141pt1 (mycorrhiza)	expression (TPM) in sample 141pt2 (mycorrhiza)	expression (TPM) in sample 141pt3 (mycorrhiza)	log2FoldChange (LFC) between FLM and mycorrhiza	adjusted p.value
Lacviv1|1012593	Lacviv1	1012593	gene_6901	Induced during mycorrhization	VI	SSP	NA	NA	NA	NA	NA	NA	NA	NA	PF01185	Hydrophobin	NA	Other function	Hydrophobin	OG0013116	0.791854	0.662779	0.760607	17.5476	2.7593	26.6677	5.14261	0.00336723
Lacviv1|1178895	Lacviv1	1178895	gene_5025	Induced during mycorrhization	VI	NA	NA	NA	NA	NA	NA	NA	NA	NA	NA	NA	NA	Unknown	Unknown	OG0000119	1.71983	1.6941	2.20741	126.665	73.9228	76.9001	5.611	7.22e-55
Lacviv1|1309388	Lacviv1	1309388	gene_10154	Induced during mycorrhization	VI	NA	NA	NA	NA	NA	NA	NA	1.13.11.5	Homogentisate 1,2-dioxygenase.	PF04209	HgmA	Amino acid transport and metabolism	Other function	Homogentisate 1,2-dioxygenase.	OG0003955	6.50781	2.51667	2.16921	38.9519	70.9617	76.6633	5.10673	1.11e-26
Lacviv1|1316000	Lacviv1	1316000	gene_8733	Induced during mycorrhization	VI	NA	NA	NA	NA	NA	NA	NA	NA	NA	PF07690	MFS_1	NA	Transporter/Permease	Unknown transporter	OG0008716	40.2131	54.7581	44.0366	378.733	517.733	440.898	3.67256	4.27e-17
Lacviv1|151597	Lacviv1	151597	gene_7971	Induced during mycorrhization	VI	NA	NA	NA	NA	NA	NA	NA	NA	NA	PF00916,PF01740	Sulfate_transp,STAS	Inorganic ion transport and metabolism	Transporter/Permease	Sulfate transporter	OG0001900	14.4447	12.108	18.8463	91.8636	159.78	118.382	3.8234	0.000148928
Lacviv1|1557654	Lacviv1	1557654	gene_2968	Induced during mycorrhization	VI	SSP	NA	NA	NA	NA	NA	NA	NA	NA	NA	NA	NA	Unknown	Unknown	OG0004146	4.86746	4.78044	5.96637	91.1681	110.063	250.498	5.06447	4.32e-13
Lacviv1|1568553	Lacviv1	1568553	gene_10101	Induced during mycorrhization	VI	NA	NA	NA	NA	NA	NA	NA	NA	NA	PF03169	OPT	Signal transduction mechanisms	Transporter/Permease	oligopeptide transporter	OG0000211	5.54921	4.59872	5.92227	23.2082	26.195	42.3457	2.81861	0.0410438
Lacviv1|1568711	Lacviv1	1568711	gene_10290	Induced during mycorrhization	VI	Secreted	NA	NA	NA	NA	NA	NA	NA	NA	PF12222	PNGaseA	NA	Other function	PNGaseA	OG0011172	2.11938	2.7102	2.09318	108.609	41.7891	61.0881	5.43355	1.18e-20
Lacviv1|1569892	Lacviv1	1569892	gene_11016	Induced during mycorrhization	VI	NA	NA	NA	NA	NA	NA	NA	NA	NA	NA	NA	NA	Unknown	Unknown	OG0002479	4.60672	5.71137	7.13211	248.05	128.417	250.427	5.17753	2.8e-26
Lacviv1|1576780	Lacviv1	1576780	gene_7519	Induced during mycorrhization	VI	Secreted	NA	NA	NA	NA	NA	NA	NA	NA	NA	NA	NA	Unknown	Unknown	OG0005796	2.70276	2.68008	2.46392	13.896	13.5967	29.2133	3.12726	0.0368097
Lacviv1|1611988	Lacviv1	1611988	gene_3596	Induced during mycorrhization	VI	NA	NA	NA	NA	NA	NA	NA	NA	NA	PF02133	Transp_cyt_pur	Coenzyme transport and metabolism ; Nucleotide transport and metabolism	Transporter/Permease	Nucleobases transporter	OG0004636	5.74613	3.95364	6.08556	42.6832	42.8972	36.7485	2.66642	0.000349725
Lacviv1|1644236	Lacviv1	1644236	gene_10221	Induced during mycorrhization	VI	Secreted	NA	AA3_2	PartialPCWdegradation	NA	NA	NA	1.1.99.1	Choline dehydrogenase.	PF00732,PF05199	GMC_oxred_N,GMC_oxred_C	General function prediction only	CAZyme	GMC oxidoreductase	OG0000343	35.1508	48.8334	52.7153	223.092	222.937	281.868	2.71094	0.00427729
Lacviv1|1649465	Lacviv1	1649465	gene_10664	Induced during mycorrhization	VI	Secreted	NA	NA	NA	NA	NA	NA	3.4.24.-	Metalloendopeptidases.	PF02128	Peptidase_M36	NA	Protease	Fungalysin (M36)	OG0000402	2.82954	2.54296	2.63095	148.252	151.915	188.999	6.33173	7.42e-105
Lacviv1|1675717	Lacviv1	1675717	gene_7185	Induced during mycorrhization	VI	NA	NA	NA	NA	NA	NA	NA	NA	NA	PF03169	OPT	Signal transduction mechanisms	Transporter/Permease	oligopeptide transporter	OG0000211	4.87548	5.35703	4.46493	224.698	71.2663	78.3863	4.88935	3.48e-10
Lacviv1|1682629	Lacviv1	1682629	gene_5491	Induced during mycorrhization	VI	Secreted	NA	NA	NA	NA	NA	NA	NA	NA	PF12222	PNGaseA	NA	Other function	PNGaseA	OG0011172	6.83782	6.5053	7.6257	48.1171	44.1499	77.7413	3.38496	5.78e-06
Lacviv1|1686429	Lacviv1	1686429	gene_7196	Induced during mycorrhization	VI	NA	NA	NA	NA	NA	NA	NA	NA	NA	NA	NA	NA	Unknown	Unknown	OG0000960	0.278935	0.700528	0.903606	6.78277	8.72287	9.55305	4.43049	1.59e-10
Lacviv1|1689006	Lacviv1	1689006	gene_9424	Induced during mycorrhization	VI	NA	NA	NA	NA	NA	NA	NA	NA	NA	PF00860	Xan_ur_permease	NA	Transporter/Permease	Unknown permease	OG0001491	20.9472	20.4437	20.2639	124.155	163.41	100.389	2.88657	0.000704857
Lacviv1|1689851	Lacviv1	1689851	gene_10658	Induced during mycorrhization	VI	Secreted	NA	NA	NA	NA	NA	NA	3.4.24.-	Metalloendopeptidases.	PF02128,PF07504	Peptidase_M36,FTP	NA	Protease	Fungalysin (M36)	OG0003286	4.04453	5.82386	4.96209	99.6009	54.9778	76.2262	3.89639	2.99e-15
Lacviv1|1703554	Lacviv1	1703554	gene_6124	Induced during mycorrhization	VI	NA	NA	AA3_2	PartialPCWdegradation	NA	NA	NA	1.1.99.1	Choline dehydrogenase.	PF00732,PF05199	GMC_oxred_N,GMC_oxred_C	General function prediction only	CAZyme	GMC oxidoreductase	OG0003390	14.4471	12.5567	15.527	378.716	486.863	588.643	5.22702	1e-49
Lacviv1|1704660	Lacviv1	1704660	gene_10662	Induced during mycorrhization	VI	Secreted	NA	NA	NA	NA	NA	NA	3.4.24.-	Metalloendopeptidases.	PF02128	Peptidase_M36	NA	Protease	Fungalysin (M36)	OG0002152	1.81162	2.51924	1.87167	149.028	83.6532	121.954	5.82657	3.07e-50
Lacviv1|1728746	Lacviv1	1728746	gene_11113	Induced during mycorrhization	VI	Secreted	NA	NA	NA	NA	NA	NA	3.4.24.-	Metalloendopeptidases.	PF02128,PF07504	Peptidase_M36,FTP	NA	Protease	Fungalysin (M36)	OG0003286	7.37643	5.03587	8.3611	287.698	192.238	158.871	5.12487	1.46e-33
Lacviv1|1733228	Lacviv1	1733228	gene_1650	Induced during mycorrhization	VI	NA	NA	NA	NA	NA	NA	NA	NA	NA	PF07690	MFS_1	Carbohydrate transport and metabolism	Transporter/Permease	Unknown transporter	OG0001523	19.1145	17.901	19.7766	335.102	259.552	455.201	4.4199	1.33e-20
Lacviv1|1767902	Lacviv1	1767902	gene_9421	Induced during mycorrhization	VI	NA	NA	NA	NA	NA	NA	NA	NA	NA	PF00860	Xan_ur_permease	NA	Transporter/Permease	Unknown permease	OG0003477	24.1102	26.1973	24.3053	545.188	334.267	482.265	4.33184	2.85e-26
Lacviv1|1811791	Lacviv1	1811791	gene_7814	Induced during mycorrhization	VI	NA	NA	NA	NA	NA	NA	NA	3.4.23.1	Pepsin A.	PF00026,PF14543	Asp,TAXi_N	Posttranslational modification, protein turnover, chaperones	Protease	Pepsin (A1)	OG0003683	13.1834	20.117	22.7362	517.251	883.019	402.4	5.27823	5.53e-21
Lacviv1|302505	Lacviv1	302505	gene_4331	Induced during mycorrhization	VI	SSP	NA	NA	NA	NA	NA	NA	NA	NA	PF02265	S1-P1_nuclease	NA	Other function	Nuclease	OG0000476	5.45181	4.87638	5.27135	16.5427	15.1165	12.0751	3.4405	1.14e-06
Lacviv1|535284	Lacviv1	535284	gene_13881	Induced during mycorrhization	VI	Secreted	NA	AA3_2	PartialPCWdegradation	NA	NA	NA	1.1.99.1	Choline dehydrogenase.	PF00732,PF05199	GMC_oxred_N,GMC_oxred_C	General function prediction only	CAZyme	GMC oxidoreductase	OG0000309	3.15795	3.16364	4.10659	47.0441	33.1729	136.79	4.04059	4.16e-07
Lacviv1|570307	Lacviv1	570307	gene_7518	Induced during mycorrhization	VI	Secreted	NA	NA	NA	NA	NA	NA	NA	NA	NA	NA	NA	Unknown	Unknown	OG0001400	34.4549	35.3681	35.0025	338.157	138.031	405.198	3.11415	0.0390725
Lacviv1|629429	Lacviv1	629429	gene_11129	Induced during mycorrhization	VI	NA	NA	NA	NA	NA	NA	NA	2.5.1.18	Glutathione transferase.	PF13417,PF13409,PF13410,PF02798	GST_N_3,GST_N_2,GST_C_2,GST_N	Posttranslational modification, protein turnover, chaperones	Other function	Glutathione transferase	OG0000019	7.09064	8.93512	9.6397	145.117	75.5861	175.148	3.93538	2.27e-08
Lacviv1|675816	Lacviv1	675816	gene_4866	Induced during mycorrhization	VI	NA	NA	NA	NA	NA	NA	NA	NA	NA	PF12697,PF00561	Abhydrolase_6,Abhydrolase_1	NA	Other function	Abhydrolase	OG0003638	0.777416	1.86872	1.01192	143.124	141.672	346.849	7.96864	8.52e-41
Lacviv1|MSTRG.10132	Lacviv1	NA	MSTRG.10132	Induced during mycorrhization	VI	SSP	NA	NA	NA	NA	NA	NA	NA	NA	PF01185	Hydrophobin	NA	Other function	Hydrophobin	OG0013614	0.332341	0.092069	0.348235	8.96202	5.01792	24.4226	5.72146	0.000538024
Lacviv1|MSTRG.3152	Lacviv1	NA	MSTRG.3152	Induced during mycorrhization	VI	NA	NA	AA3	PartialPCWdegradation	NA	NA	NA	NA	NA	PF00732	GMC_oxred_N	NA	Unknown	Inconsistent annotation	OG0000309	11.7998	16.7192	16.7041	103.016	103.42	123.099	2.96065	3.26e-05
Lacviv1|1069400	Lacviv1	1069400	gene_2024	Induced during mycorrhization	IV	NA	NA	NA	NA	NA	NA	NA	NA	NA	PF00230	MIP	Carbohydrate transport and metabolism	Transporter/Permease	MIP	OG0003579	22.7036	20.842	20.9641	311.177	123.661	292.417	3.56546	4.85e-07
Lacviv1|1314286	Lacviv1	1314286	gene_8716	Induced during mycorrhization	IV	NA	NA	NA	NA	NA	NA	NA	NA	NA	PF00083,PF07690	Sugar_tr,MFS_1	General function prediction only	Transporter/Permease	Sugar transporter	OG0001055	22.6357	18.1864	21.7509	362.712	462.358	397.477	4.58308	2.39e-60
Lacviv1|1412436	Lacviv1	1412436	gene_10697	Induced during mycorrhization	IV	NA	NA	NA	NA	NA	NA	NA	NA	NA	PF03169	OPT	Signal transduction mechanisms	Transporter/Permease	oligopeptide transporter	OG0002440	19.8265	20.8631	24.9405	1429.06	927.436	1352.99	6.06798	3.95e-82
Lacviv1|1562880	Lacviv1	1562880	gene_6506	Induced during mycorrhization	IV	NA	NA	GH16	Glucan	NA	NA	NA	NA	NA	PF00722	Glyco_hydro_16	NA	CAZyme	Glycoside Hydrolase	OG0002425	17.5112	19.5533	16.5719	289.133	196.986	362.475	4.36712	1.02e-18
Lacviv1|1562951	Lacviv1	1562951	gene_6432	Induced during mycorrhization	IV	NA	NA	NA	NA	NA	NA	NA	NA	NA	PF00743,PF13738,PF07992,PF13434,PF00070,PF01494,PF13450,PF02826	FMO-like,Pyr_redox_3,Pyr_redox_2,K_oxygenase,Pyr_redox,FAD_binding_3,NAD_binding_8,2-Hacid_dh_C	Secondary metabolites biosynthesis, transport and catabolism	Protease	Tryptophanyl aminopeptidase (M77)	OG0001943	5.65199	4.40995	5.87423	204.689	289.313	477.083	6.54155	2.85e-67
Lacviv1|1562972	Lacviv1	1562972	gene_6507	Induced during mycorrhization	IV	NA	NA	NA	NA	NA	NA	NA	NA	NA	PF13632,PF13641	Glyco_trans_2_3,Glyco_tranf_2_3	NA	Other function	Holds Glycosyl transferase domain	OG0007361	8.82498	9.51596	8.85964	299.976	143.396	272.871	4.69052	2.09e-20
Lacviv1|1563481	Lacviv1	1563481	gene_5699	Induced during mycorrhization	IV	NA	NA	NA	NA	NA	NA	NA	NA	NA	PF13520,PF00324	AA_permease_2,AA_permease	Amino acid transport and metabolism	Transporter/Permease	Amino acid permease	OG0007401	2.64779	2.01833	2.9889	18.9436	16.6952	29.9426	3.18664	6.77e-07
Lacviv1|1564835	Lacviv1	1564835	gene_7042	Induced during mycorrhization	IV	Secreted	NA	GH18	Chitin	3c1__1E9L chi-lectin (TIM)	NA	NA	3.2.1.14	Chitinase.	PF00704	Glyco_hydro_18	Carbohydrate transport and metabolism	CAZyme	Glycoside Hydrolase	OG0001939	16.381	18.3812	16.6561	110.941	171.684	293.391	3.3695	0.00116793
Lacviv1|1565144	Lacviv1	1565144	gene_7829	Induced during mycorrhization	IV	NA	NA	NA	NA	NA	NA	NA	NA	NA	PF00083,PF07690	Sugar_tr,MFS_1	General function prediction only	Transporter/Permease	Sugar transporter	OG0000358	11.4106	11.289	13.2046	56.7267	84.6035	88.2593	2.78393	0.0301559
Lacviv1|1569496	Lacviv1	1569496	gene_10884	Induced during mycorrhization	IV	NA	NA	NA	NA	NA	NA	NA	NA	NA	PF00319	SRF-TF	Transcription	Transcription factor	Putative transcription factor	OG0005457	0	0	0	0.148979	0	0	3.13224	0.0381179
Lacviv1|1583855	Lacviv1	1583855	gene_70	Induced during mycorrhization	IV	NA	NA	NA	NA	NA	NA	NA	NA	NA	PF00125,PF00808	Histone,CBFD_NFYB_HMF	Chromatin structure and dynamics	Other function	Histone-like transcription factor	OG0000761	62.7816	69.8444	71.8826	421.582	259.673	513.803	2.84606	0.0463821
Lacviv1|1584511	Lacviv1	1584511	gene_180	Induced during mycorrhization	IV	NA	NA	NA	NA	NA	NA	NA	5.5.1.4	Myo-inositol-1-phosphate synthase.	PF07994,PF01658	NAD_binding_5,Inos-1-P_synth	Lipid transport and metabolism	Other function	Myo-inositol-1-phosphate synthase.	OG0003146	29.4053	14.9703	16.4267	216.652	101.837	103.152	3.62267	5.36e-06
Lacviv1|1594370	Lacviv1	1594370	gene_1769	Induced during mycorrhization	IV	NA	NA	NA	NA	NA	NA	NA	NA	NA	PF00172	Zn_clus	NA	Transcription factor	Holds a zinc finger domain	OG0004060	117.071	119.743	137.155	980.694	2525.84	1174.89	3.85306	4.56e-06
Lacviv1|1610487	Lacviv1	1610487	gene_5480	Induced during mycorrhization	IV	NA	NA	NA	NA	NA	NA	NA	NA	NA	PF13520	AA_permease_2	Amino acid transport and metabolism	Transporter/Permease	Amino acid permease	OG0007191	5.20545	5.29149	6.373	41.4364	72.47	40.7552	3.61807	3.62e-08
Lacviv1|1635011	Lacviv1	1635011	gene_9981	Induced during mycorrhization	IV	NA	NA	NA	NA	NA	NA	NA	NA	NA	PF02535	Zip	Inorganic ion transport and metabolism	Other function	Holds a Zip domain	OG0001617	92.3631	84.1345	148.362	1210.56	949.189	1117.88	3.36653	1.94e-08
Lacviv1|1672369	Lacviv1	1672369	gene_630	Induced during mycorrhization	IV	NA	NA	NA	NA	NA	NA	NA	NA	NA	PF01937	DUF89	Function unknown	Unknown	Unknown	OG0006306	45.5609	57.911	40.5312	348.249	2451.31	2227.47	5.3547	0.000474252
Lacviv1|1673972	Lacviv1	1673972	gene_3836	Induced during mycorrhization	IV	NA	NA	NA	NA	NA	NA	NA	NA	NA	PF03169	OPT	Signal transduction mechanisms	Transporter/Permease	oligopeptide transporter	OG0001207	6.08078	6.08084	6.02503	52.5441	88.8401	88.3806	3.9192	2.94e-18
Lacviv1|1674440	Lacviv1	1674440	gene_4436	Induced during mycorrhization	IV	NA	NA	NA	NA	NA	NA	NA	NA	NA	PF13520,PF00324	AA_permease_2,AA_permease	Amino acid transport and metabolism	Transporter/Permease	Amino acid permease	OG0004592	4.69767	4.74124	4.64556	76.548	101.713	55.5272	4.61558	1.1e-20
Lacviv1|1675110	Lacviv1	1675110	gene_5890	Induced during mycorrhization	IV	Secreted	NA	GH16	Glucan	NA	NA	NA	NA	NA	NA	NA	NA	CAZyme	Glycoside Hydrolase	OG0005625	4.83021	4.30725	5.72317	35.5952	34.8221	18.4152	2.94368	0.0247448
Lacviv1|1676070	Lacviv1	1676070	gene_7718	Induced during mycorrhization	IV	NA	NA	NA	NA	NA	NA	NA	NA	NA	PF00083,PF07690	Sugar_tr,MFS_1	General function prediction only	Transporter/Permease	Sugar transporter	OG0002978	21.3464	24.5544	22.8555	105.053	106.323	135.692	2.61834	0.000713408
Lacviv1|1676456	Lacviv1	1676456	gene_10715	Induced during mycorrhization	IV	Secreted	NA	AA5_1	PartialPCWdegradation	NA	NA	NA	NA	NA	PF01822,PF07250,PF09118	WSC,Glyoxal_oxid_N,DUF1929	Carbohydrate transport and metabolism ; Posttranslational modification, protein turnover, chaperones	CAZyme	Copper radical oxidase	OG0004642	52.8001	66.9395	57.1468	760.444	267.212	758.052	3.37167	0.00658683
Lacviv1|1682266	Lacviv1	1682266	gene_3826	Induced during mycorrhization	IV	NA	NA	NA	NA	NA	NA	NA	3.6.1.19	Nucleoside-triphosphate pyrophosphatase.	PF01725	Ham1p_like	Nucleotide transport and metabolism	Other function	Ham1p_like	OG0011132	13.0716	13.4302	11.5791	52.0977	62.4694	92.1983	2.92704	0.0396793
Lacviv1|1682346	Lacviv1	1682346	gene_3171	Induced during mycorrhization	IV	NA	NA	NA	NA	NA	NA	NA	5.2.1.8	Peptidylprolyl isomerase.	PF00254	FKBP_C	Posttranslational modification, protein turnover, chaperones	Other function	Peptidylprolyl isomerase.	OG0005240	2.10754	0	0	16.142	186.549	284.908	7.59316	9.56e-06
Lacviv1|1684974	Lacviv1	1684974	gene_5726	Induced during mycorrhization	IV	Secreted	NA	AA1_1	Phenols	NA	NA	NA	1.10.3.2	Laccase.	PF00394,PF07731,PF07732	Cu-oxidase,Cu-oxidase_2,Cu-oxidase_3	Secondary metabolites biosynthesis, transport and catabolism	CAZyme	Laccase	OG0005444	1.88954	1.52672	2.014	108.61	132.431	173.672	4.90415	3.95e-52
Lacviv1|1687968	Lacviv1	1687968	gene_7782	Induced during mycorrhization	IV	Secreted	NA	GH18	Chitin	3c1__1E9L chi-lectin (TIM)	NA	NA	3.2.1.14	Chitinase.	PF00704	Glyco_hydro_18	Carbohydrate transport and metabolism	CAZyme	Glycoside Hydrolase	OG0000948	15.7337	20.6551	16.135	254.092	267.647	596.814	4.77776	1.14e-15
Lacviv1|1687975	Lacviv1	1687975	gene_7791	Induced during mycorrhization	IV	NA	NA	NA	NA	NA	NA	NA	NA	NA	PF03239	FTR1	NA	Transporter/Permease	Iron permease	OG0003117	4.56433	4.57328	4.6391	37.7239	41.6366	41.4404	4.06596	1.36e-25
Lacviv1|1711162	Lacviv1	1711162	gene_10873	Induced during mycorrhization	IV	NA	NA	AA5_1	PartialPCWdegradation	NA	NA	NA	1.1.3.9	Galactose oxidase.	PF07250,PF01822,PF09118	Glyoxal_oxid_N,WSC,DUF1929	Carbohydrate transport and metabolism ; Posttranslational modification, protein turnover, chaperones	CAZyme	Copper radical oxidase	OG0003620	13.2271	14.232	14.7291	164.976	128.506	431.322	4.04647	3.36e-05
Lacviv1|1736692	Lacviv1	1736692	gene_9174	Induced during mycorrhization	IV	NA	NA	NA	NA	NA	NA	NA	NA	NA	PF06027,PF08627	SLC35F,CRT-like	Function unknown	Other function	Solute carrier family 35	OG0004256	5.88893	5.82632	9.02748	44.5728	34.8651	65.4932	3.08655	0.000873268
Lacviv1|1779461	Lacviv1	1779461	gene_7236	Induced during mycorrhization	IV	NA	NA	NA	NA	NA	NA	NA	NA	NA	PF02171,PF16486,PF08699,PF02170,PF16488	Piwi,ArgoN,ArgoL1,PAZ,ArgoL2	Translation, ribosomal structure and biogenesis	Other function	Piwi/argonaute	OG0001027	5.46307	5.23341	3.91075	115.735	21.1534	199.033	5.02995	0.00833574
Lacviv1|1779802	Lacviv1	1779802	gene_8418	Induced during mycorrhization	IV	NA	NA	NA	NA	NA	NA	NA	NA	NA	PF06441,PF00561	EHN,Abhydrolase_1	General function prediction only	Other function	Abhydrolase	OG0000576	4.07579	4.79043	6.17165	52.5982	19.024	51.8802	3.18537	0.0390631
Lacviv1|1813989	Lacviv1	1813989	gene_9323	Induced during mycorrhization	IV	Secreted	NA	GH20	Chitin	NA	NA	NA	3.2.1.52	Beta-N-acetylhexosaminidase.	PF00728,PF14845,PF02838	Glyco_hydro_20,Glycohydro_20b2,Glyco_hydro_20b	Carbohydrate transport and metabolism	CAZyme	Glycoside Hydrolase	OG0000176	1.40272	2.01543	1.12338	12.4327	17.8558	22.3482	3.39136	0.000248114
Lacviv1|1833090	Lacviv1	1833090	gene_7835	Induced during mycorrhization	IV	NA	NA	NA	NA	NA	NA	NA	NA	NA	PF07690,PF00083	MFS_1,Sugar_tr	General function prediction only	Transporter/Permease	Sugar transporter	OG0003456	13.7371	14.1744	10.4182	973.318	1037.33	726.473	6.41736	7.58e-105
Lacviv1|335214	Lacviv1	335214	gene_3835	Induced during mycorrhization	IV	NA	NA	NA	NA	NA	NA	NA	NA	NA	PF03169	OPT	Signal transduction mechanisms	Transporter/Permease	oligopeptide transporter	OG0009201	1.48355	2.09771	1.34037	6.80509	20.528	17.7627	3.16232	0.00427729
Lacviv1|42541	Lacviv1	42541	gene_320	Induced during mycorrhization	IV	NA	NA	NA	NA	NA	NA	NA	5.2.1.8	Peptidylprolyl isomerase.	PF00160	Pro_isomerase	Posttranslational modification, protein turnover, chaperones	Other function	Peptidylprolyl isomerase.	OG0002564	14.5798	13.8338	15.3992	268.266	214.262	250.746	4.1989	2.23e-38
Lacviv1|463252	Lacviv1	463252	gene_1270	Induced during mycorrhization	IV	NA	NA	NA	NA	NA	NA	NA	NA	NA	PF00083,PF07690	Sugar_tr,MFS_1	General function prediction only	Transporter/Permease	Sugar transporter	OG0004100	106.491	111.605	104.384	1370.54	2226.92	1681.62	4.31707	1.47e-28
Lacviv1|524215	Lacviv1	524215	gene_4515	Induced during mycorrhization	IV	NA	NA	NA	NA	NA	NA	NA	6.3.2.19	Ubiquitin--protein ligase.	PF02182	SAD_SRA	NA	Other function	Ubiquitin--protein ligase.	OG0002410	23.819	2.45003	2.7753	17.8695	14.2288	14.0252	2.90208	0.00656335
Lacviv1|754941	Lacviv1	754941	gene_6492	Induced during mycorrhization	IV	NA	NA	NA	NA	NA	NA	NA	1.14.13.1	Salicylate 1-monooxygenase.	PF01494,PF07992,PF13450,PF01593,PF04820	FAD_binding_3,Pyr_redox_2,NAD_binding_8,Amino_oxidase,Trp_halogenase	Energy production and conversion ; General function prediction only	Other function	Salicylate 1-monooxygenase.	OG0001733	28.7431	28.7086	25.7177	158.434	138.516	217.324	2.96025	0.000713534
Lacviv1|838956	Lacviv1	838956	gene_5993	Induced during mycorrhization	IV	NA	NA	NA	NA	NA	NA	NA	NA	NA	PF09729	Gti1_Pac2	Carbohydrate transport and metabolism ; Signal transduction mechanisms	Other function	Holds a Gti1_Pac2 domain	OG0002619	15.8605	14.6552	17.603	199.661	178.957	374.385	4.20098	4.73e-10
Lacviv1|935415	Lacviv1	935415	gene_8849	Induced during mycorrhization	IV	Secreted	NA	GH5_9	Glucan	NA	NA	NA	3.2.1.58	Glucan 1,3-beta-glucosidase.	PF00150	Cellulase	NA	CAZyme	Glycoside Hydrolase	OG0008052	10.6226	6.3657	5.179	73.9717	68.8826	119.064	3.64995	7.97e-08
Lacviv1|MSTRG.6387	Lacviv1	NA	MSTRG.6387	Induced during mycorrhization	IV	NA	NA	NA	NA	NA	NA	NA	NA	NA	PF16862	Glyco_hydro_79C	NA	Unknown	Unknown	OG0010292	6.08303	5.83637	5.86014	39.859	52.6293	31.7444	2.84987	0.00603375
Lacviv1|1218954	Lacviv1	1218954	gene_8027	Induced during mycorrhization	III	NA	NA	NA	NA	NA	NA	NA	NA	NA	PF00172	Zn_clus	NA	Transcription factor	Holds a zinc finger domain	OG0004301	16.9154	18.7164	16.2085	152.11	212.876	480.388	4.22479	4.54e-08
Lacviv1|1267709	Lacviv1	1267709	gene_8876	Induced during mycorrhization	III	NA	NA	NA	NA	NA	NA	NA	3.1.3.48	Protein-tyrosine-phosphatase.	PF00581	Rhodanese	Cell cycle control, cell division, chromosome partitioning	Other function	Rhodanese	OG0007229	2.53096	3.4868	3.18583	21.0368	13.5124	24.8449	2.94082	0.041317
Lacviv1|1336870	Lacviv1	1336870	gene_8788	Induced during mycorrhization	III	Secreted	NA	NA	NA	NA	NA	NA	NA	NA	PF09362	DUF1996	NA	Unknown	Unknown	OG0004294	6.31631	6.6718	5.80193	77.9212	346.065	444.379	5.50942	2.83e-05
Lacviv1|1336975	Lacviv1	1336975	gene_8789	Induced during mycorrhization	III	Secreted	NA	NA	NA	NA	NA	NA	NA	NA	PF09362	DUF1996	NA	Unknown	Unknown	OG0010021	40.466	45.8893	44.8239	430.896	246.953	363.589	3.12043	4.05e-05
Lacviv1|1382939	Lacviv1	1382939	gene_2243	Induced during mycorrhization	III	Secreted	NA	NA	NA	NA	NA	NA	NA	NA	PF00188	CAP	Function unknown	Other function	cysteine-rich secretory protein	OG0003640	35.7464	39.1637	33.1342	254.615	193.805	317.755	3.03437	1.93e-06
Lacviv1|1412032	Lacviv1	1412032	gene_10692	Induced during mycorrhization	III	NA	NA	NA	NA	NA	NA	NA	NA	NA	PF00578,PF10417,PF08534	AhpC-TSA,1-cysPrx_C,Redoxin	Posttranslational modification, protein turnover, chaperones	Other function	Peroxiredoxins	OG0000732	3.74975	3.67632	2.57456	17.353	11.7375	14.8265	3.45687	0.000108478
Lacviv1|1552822	Lacviv1	1552822	gene_7	Induced during mycorrhization	III	NA	NA	NA	NA	NA	NA	NA	NA	NA	PF00230	MIP	Carbohydrate transport and metabolism	Transporter/Permease	MIP	OG0005432	0.838721	0.108574	0	198.668	243.014	141.394	10.2866	3.98e-172
Lacviv1|1554098	Lacviv1	1554098	gene_1501	Induced during mycorrhization	III	NA	NA	NA	NA	NA	NA	NA	1.14.14.1	Unspecific monooxygenase.	PF00067	p450	Lipid transport and metabolism ; Secondary metabolites biosynthesis, transport and catabolism	Cytochrome p450		OG0001229	45.9425	41.0389	43.5792	352.269	699.317	337.893	3.71444	1.98e-07
Lacviv1|1557028	Lacviv1	1557028	gene_2380	Induced during mycorrhization	III	NA	NA	PL8_4	Pectin	NA	NA	NA	NA	NA	PF02278,PF08124,PF02884	Lyase_8,Lyase_8_N,Lyase_8_C	NA	Other function	Polysaccharide lyase family 8	OG0008106	32.3826	29.6751	34.7661	130.19	200.332	349.882	3.35211	0.00256916
Lacviv1|1559266	Lacviv1	1559266	gene_4361	Induced during mycorrhization	III	NA	NA	NA	NA	NA	NA	NA	NA	NA	PF07690	MFS_1	Carbohydrate transport and metabolism	Transporter/Permease	Unknown transporter	OG0003669	2.85059	3.25229	2.16535	46.8347	92.0788	117.009	5.35846	8.7e-23
Lacviv1|1562265	Lacviv1	1562265	gene_6374	Induced during mycorrhization	III	NA	CAH17527|GGGX|abH03	NA	NA	NA	NA	NA	3.1.1.3	Triacylglycerol lipase.	PF00135,PF07859	COesterase,Abhydrolase_3	Signal transduction mechanisms	Lipase	Triacylglycerol lipase.	OG0004751	6.12632	7.47609	8.54131	63.2852	37.4337	86.5846	3.24183	0.00230622
Lacviv1|1562606	Lacviv1	1562606	gene_4903	Induced during mycorrhization	III	Secreted	NA	NA	NA	NA	NA	NA	1.14.18.1	Monophenol monooxygenase.	PF00264	Tyrosinase	NA	Other function	Tyrosinase	OG0004296	0.369917	0.332884	0.434666	164.425	248.442	110.502	8.75564	7.16e-69
Lacviv1|1569683	Lacviv1	1569683	gene_10944	Induced during mycorrhization	III	NA	NA	NA	NA	NA	NA	NA	NA	NA	PF01184	Grp1_Fun34_YaaH	NA	Other function	Holds a Grp1_Fun34_YaaH domain	OG0001665	7.53955	7.96044	11.3784	131.327	159.384	145.147	4.22791	6.74e-26
Lacviv1|1576064	Lacviv1	1576064	gene_3879	Induced during mycorrhization	III	NA	NA	NA	NA	NA	NA	NA	NA	NA	PF11700	ATG22	NA	Transporter/Permease	Amino acid or protein transporter	OG0001608	8.2993	9.14145	9.84659	185.494	109.832	163.891	3.96552	2.99e-17
Lacviv1|1576065	Lacviv1	1576065	gene_3880	Induced during mycorrhization	III	NA	NA	NA	NA	NA	NA	NA	NA	NA	PF11700,PF07690	ATG22,MFS_1	NA	Transporter/Permease	Amino acid or protein transporter	OG0001608	5.15284	4.96971	5.56139	214.897	69.6881	156.743	4.98048	1.91e-16
Lacviv1|1577672	Lacviv1	1577672	gene_5928	Induced during mycorrhization	III	Secreted	NA	NA	NA	NA	NA	NA	NA	NA	PF07470	Glyco_hydro_88	NA	Other function	Holds a GH88 domain	OG0007526	0	0	0	0	0	0	3.19861	0.00586314
Lacviv1|1577936	Lacviv1	1577936	gene_8601	Induced during mycorrhization	III	NA	NA	NA	NA	NA	NA	NA	NA	NA	PF00172	Zn_clus	NA	Transcription factor	Holds a zinc finger domain	OG0001562	38.9161	34.7735	47.1928	142.687	222.22	241.695	2.8184	0.0111979
Lacviv1|1579380	Lacviv1	1579380	gene_7684	Induced during mycorrhization	III	NA	NA	NA	NA	NA	NA	NA	1.6.99.1	NADPH dehydrogenase.	PF00724	Oxidored_FMN	Energy production and conversion ; General function prediction only	Other function	NADPH dehydrogenase.	OG0000206	70.6606	43.2098	46.8254	345.676	783.033	579.257	3.5705	5.29e-06
Lacviv1|1582904	Lacviv1	1582904	gene_13205	Induced during mycorrhization	III	Secreted	NA	GH47	NA	NA	NA	NA	3.2.1.113	Mannosyl-oligosaccharide 1,2-alpha-mannosidase.	PF01532	Glyco_hydro_47	Carbohydrate transport and metabolism	CAZyme	Glycoside Hydrolase	OG0002084	1.63902	1.59807	1.73337	26.0841	26.2655	63.6969	4.86956	3.61e-12
Lacviv1|1590271	Lacviv1	1590271	gene_1540	Induced during mycorrhization	III	NA	NA	NA	NA	NA	NA	NA	NA	NA	PF04143	Sulf_transp	NA	Transporter/Permease	Sulfur transporter	OG0005388	27.8311	29.0236	26.4686	108.343	112.051	116.831	2.6016	0.00835884
Lacviv1|1592969	Lacviv1	1592969	gene_686	Induced during mycorrhization	III	NA	NA	NA	NA	NA	NA	NA	NA	NA	NA	NA	NA	Unknown	Unknown	OG0006323	16.3046	19.3064	15.7347	169.514	124.494	272.377	3.92325	7.22e-10
Lacviv1|1599029	Lacviv1	1599029	gene_5604	Induced during mycorrhization	III	NA	NA	NA	NA	NA	NA	NA	NA	NA	NA	NA	NA	Unknown	Unknown	OG0008740	14.7919	16.0276	16.6881	136.166	123.735	170.855	3.14072	4.81e-08
Lacviv1|1630063	Lacviv1	1630063	gene_6895	Induced during mycorrhization	III	NA	NA	NA	NA	NA	NA	NA	3.6.3.29	Molybdate-transporting ATPase.	PF01061,PF00005	ABC2_membrane,ABC_tran	Secondary metabolites biosynthesis, transport and catabolism	Transporter/Permease	Molybdate-transporting ATPase.	OG0000805	11.1684	12.2633	12.0508	0	50.4368	93.7146	2.82307	0.000728186
Lacviv1|1638568	Lacviv1	1638568	gene_8926	Induced during mycorrhization	III	Secreted	NA	GH5_15	Glucan	NA	NA	NA	3.2.1.58	Glucan 1,3-beta-glucosidase.	PF00150	Cellulase	NA	CAZyme	Glycoside Hydrolase	OG0002241	4.66634	7.4356	5.3201	107.718	122.601	149.737	4.53444	1.53e-23
Lacviv1|1638806	Lacviv1	1638806	gene_8957	Induced during mycorrhization	III	NA	NA	NA	NA	NA	NA	NA	1.14.14.1	Unspecific monooxygenase.	PF00067	p450	Lipid transport and metabolism ; Secondary metabolites biosynthesis, transport and catabolism	Cytochrome p450		OG0008937	2.17619	2.33027	2.06976	37.1048	25.34	66.9628	4.50519	2.2e-09
Lacviv1|1638906	Lacviv1	1638906	gene_8977	Induced during mycorrhization	III	NA	NA	NA	NA	NA	NA	NA	NA	NA	PF00248	Aldo_ket_red	Energy production and conversion	Other function	Aldo/keto reductase	OG0000243	73.3662	59.6524	68.2773	1418.81	1699.16	1807.58	5.36559	9.08e-116
Lacviv1|1647646	Lacviv1	1647646	gene_10343	Induced during mycorrhization	III	NA	NA	NA	NA	NA	NA	NA	2.1.1.110	Sterigmatocystin 7-O-methyltransferase.	PF00891	Methyltransf_2	General function prediction only	Other function	Methyltransferase	OG0000151	4.48618	4.0101	2.98396	121.422	133.361	358.812	3.9201	0.000162428
Lacviv1|1650205	Lacviv1	1650205	gene_11137	Induced during mycorrhization	III	NA	NA	NA	NA	NA	NA	NA	NA	NA	PF04082	Fungal_trans	NA	Transcription factor	Fungal specific transcription factor domain	OG0001086	19.0624	23.0042	19.8053	324.237	204.14	435.051	3.95848	1.05e-09
Lacviv1|1661737	Lacviv1	1661737	gene_12151	Induced during mycorrhization	III	NA	NA	GH31	Starch/Glycogen	NA	NA	NA	3.2.1.20	Alpha-glucosidase.	PF01055,PF16863,PF13802	Glyco_hydro_31,NtCtMGAM_N,Gal_mutarotas_2	Carbohydrate transport and metabolism	CAZyme	Glycoside Hydrolase	OG0003883	34.2243	35.7001	35.7106	217.807	160.78	208.841	2.74825	0.00091239
Lacviv1|1674430	Lacviv1	1674430	gene_4419	Induced during mycorrhization	III	Secreted	NA	CE4	Hemicellulose	NA	NA	NA	3.5.1.41	Chitin deacetylase.	PF01522	Polysacc_deac_1	NA	CAZyme	Carbohydrate Esterase	OG0010397	120.771	92.9402	98.5086	573.806	557.663	722.943	2.74567	0.00501525
Lacviv1|1675123	Lacviv1	1675123	gene_5917	Induced during mycorrhization	III	SSP	NA	NA	NA	NA	NA	NA	NA	NA	NA	NA	NA	Unknown	Unknown	OG0002482	0.61086	1.67707	1.00705	27.9619	36.998	48.1917	6.12707	1.69e-26
Lacviv1|1675205	Lacviv1	1675205	gene_7436	Induced during mycorrhization	III	NA	NA	NA	NA	NA	NA	NA	3.6.1.3	Adenosinetriphosphatase.	PF00005,PF00664,PF02463,PF13191	ABC_tran,ABC_membrane,SMC_N,AAA_16	Secondary metabolites biosynthesis, transport and catabolism	Other function	Structural maintenance of chromosomes protein	OG0004586	1.96255	2.07535	1.8987	28.0897	30.3635	25.9968	4.05536	1.23e-31
Lacviv1|1678167	Lacviv1	1678167	gene_308	Induced during mycorrhization	III	NA	NA	NA	NA	NA	NA	NA	1.14.13.-	With NADH or NADPH as one donor, and incorporation of one atom	PF00067	p450	Secondary metabolites biosynthesis, transport and catabolism	Cytochrome p450		OG0000307	8.63562	6.83939	7.37958	39.7226	32.9902	34.5545	2.53484	0.00538554
Lacviv1|1679358	Lacviv1	1679358	gene_563	Induced during mycorrhization	III	NA	NA	NA	NA	NA	NA	NA	NA	NA	PF07690	MFS_1	Carbohydrate transport and metabolism	Transporter/Permease	Unknown transporter	OG0008054	8.06854	7.80955	8.73208	469.878	579.661	721.167	6.16213	1.75e-72
Lacviv1|1679735	Lacviv1	1679735	gene_1807	Induced during mycorrhization	III	NA	NA	NA	NA	NA	NA	NA	NA	NA	PF12585	DUF3759	NA	Unknown	Unknown	OG0002916	2.47235	2.41249	2.49272	4.31388	13.5093	17.4501	6.95877	7.79e-05
Lacviv1|1681047	Lacviv1	1681047	gene_2983	Induced during mycorrhization	III	NA	NA	NA	NA	NA	NA	NA	NA	NA	NA	NA	Function unknown	Unknown	Unknown	OG0008643	103.843	87.5627	65.3864	6944.74	3393.04	3411.78	5.7157	1.83e-31
Lacviv1|1683929	Lacviv1	1683929	gene_6385	Induced during mycorrhization	III	Secreted	CAH17527|GGGX|abH03	NA	NA	NA	NA	NA	3.1.1.3	Triacylglycerol lipase.	PF00135,PF07859	COesterase,Abhydrolase_3	Signal transduction mechanisms	Lipase	Triacylglycerol lipase.	OG0009364	3.59516	4.81234	3.57429	24.8704	33.2211	29.4363	2.93396	8.25e-05
Lacviv1|1685479	Lacviv1	1685479	gene_8862	Induced during mycorrhization	III	NA	NA	NA	NA	NA	NA	NA	1.14.14.1	Unspecific monooxygenase.	PF00067	p450	Secondary metabolites biosynthesis, transport and catabolism	Cytochrome p450		OG0000572	56.1177	50.1489	59.1377	384.536	356.314	505.723	2.87973	6.9e-05
Lacviv1|1685684	Lacviv1	1685684	gene_8537	Induced during mycorrhization	III	NA	NA	NA	NA	NA	NA	NA	NA	NA	PF00067	p450	Secondary metabolites biosynthesis, transport and catabolism	Cytochrome p450		OG0000138	4.18932	3.42619	3.63635	41.176	34.5661	56.8557	3.61581	3.61e-08
Lacviv1|1687213	Lacviv1	1687213	gene_8084	Induced during mycorrhization	III	NA	NA	NA	NA	NA	NA	NA	NA	NA	PF16242,PF01243	Pyrid_ox_like,Putative_PNPOx	NA	Other function	Pyridoxamine 5'-phosphate oxidase	OG0000762	9.46	7.51817	9.77936	26.2982	80.7441	106.9	4.10569	0.000499839
Lacviv1|1687417	Lacviv1	1687417	gene_7686	Induced during mycorrhization	III	NA	NA	NA	NA	NA	NA	NA	1.6.99.1	NADPH dehydrogenase.	PF00724	Oxidored_FMN	Energy production and conversion ; General function prediction only	Other function	NADPH dehydrogenase.	OG0000206	19.1494	18.3869	18.1396	97.1618	150.642	166.639	3.08238	2.42e-05
Lacviv1|1693521	Lacviv1	1693521	gene_12148	Induced during mycorrhization	III	NA	NA	NA	NA	NA	NA	NA	NA	NA	PF00505,PF09011	HMG_box,HMG_box_2	Transcription	Transcription factor	Holds a HMG domain	OG0004161	20.3142	20.0892	20.0807	162.971	138.795	153.804	3.12997	2.52e-12
Lacviv1|1701038	Lacviv1	1701038	gene_3001	Induced during mycorrhization	III	Secreted	NA	GH3	NA	NA	NA	NA	3.2.1.21	Beta-glucosidase.	PF01915,PF00933,PF14310	Glyco_hydro_3_C,Glyco_hydro_3,Fn3-like	NA	CAZyme	Glycoside Hydrolase	OG0002732	15.068	18.4186	16.3691	387.909	290.249	583.475	4.71753	7.11e-22
Lacviv1|1703850	Lacviv1	1703850	gene_6190	Induced during mycorrhization	III	NA	NA	NA	NA	NA	NA	NA	1.14.13.-	With NADH or NADPH as one donor, and incorporation of one atom	PF00067	p450	Secondary metabolites biosynthesis, transport and catabolism	Cytochrome p450		OG0000474	21.6547	16.0958	16.7073	234.657	277.226	434.564	4.16193	2.21e-11
Lacviv1|1722946	Lacviv1	1722946	gene_11238	Induced during mycorrhization	III	NA	NA	NA	NA	NA	NA	NA	NA	NA	PF17168,PF16335,PF08760	DUF5127,DUF4965,DUF1793	NA	Unknown	Unknown	OG0002894	0.718052	1.00434	0.691359	7.82477	10.6333	18.3951	3.8772	3.71e-06
Lacviv1|1729180	Lacviv1	1729180	gene_6384	Induced during mycorrhization	III	Secreted	CAH17527|GGGX|abH03	NA	NA	NA	NA	NA	3.1.1.3	Triacylglycerol lipase.	PF00135	COesterase	Signal transduction mechanisms	Lipase	Triacylglycerol lipase.	OG0001427	5.31743	6.59134	6.40177	146.052	117.959	155.982	4.60649	2.72e-42
Lacviv1|1732228	Lacviv1	1732228	gene_1422	Induced during mycorrhization	III	NA	NA	NA	NA	NA	NA	NA	1.6.99.1	NADPH dehydrogenase.	PF00724	Oxidored_FMN	Energy production and conversion ; General function prediction only	Other function	NADPH dehydrogenase.	OG0000794	0	11.6799	0	10.9656	15.2337	15.6514	4.16319	6.84e-05
Lacviv1|1779870	Lacviv1	1779870	gene_8978	Induced during mycorrhization	III	NA	NA	NA	NA	NA	NA	NA	NA	NA	PF01794,PF08030,PF08022	Ferric_reduct,NAD_binding_6,FAD_binding_8	Inorganic ion transport and metabolism ; Secondary metabolites biosynthesis, transport and catabolism	Other function	Feric reductase	OG0004012	0.978185	1.11646	1.57174	58.1306	50.2719	122.578	6.21105	5.97e-28
Lacviv1|1780133	Lacviv1	1780133	gene_9673	Induced during mycorrhization	III	NA	NA	NA	NA	NA	NA	NA	NA	NA	PF01593,PF13450	Amino_oxidase,NAD_binding_8	Secondary metabolites biosynthesis, transport and catabolism	Other function	Holds a Amino_oxidase domain	OG0000191	0.360512	0.08689	0	90.2072	44.6807	99.7229	8.03925	1.88e-38
Lacviv1|1822873	Lacviv1	1822873	gene_5717	Induced during mycorrhization	III	NA	NA	NA	NA	NA	NA	NA	NA	NA	PF00069,PF07714	Pkinase,Pkinase_Tyr	Cell cycle control, cell division, chromosome partitioning	Other function	Tyrosine kinase	OG0019044	0	0	0	1.88716	3.20034	2.23416	4.14345	0.00823653
Lacviv1|202127	Lacviv1	202127	gene_11778	Induced during mycorrhization	III	Secreted	NA	GH3	NA	NA	NA	NA	3.2.1.21	Beta-glucosidase.	PF01915,PF00933,PF14310	Glyco_hydro_3_C,Glyco_hydro_3,Fn3-like	Transcription	CAZyme	Glycoside Hydrolase	OG0003442	3.57065	4.73489	4.06156	515.58	577.335	961.629	7.65738	6.41e-84
Lacviv1|304678	Lacviv1	304678	gene_4359	Induced during mycorrhization	III	NA	NA	NA	NA	NA	NA	NA	NA	NA	PF07690	MFS_1	Carbohydrate transport and metabolism	Transporter/Permease	Unknown transporter	OG0003669	15.767	15.0552	17.4616	73.7508	97.3567	129.194	3.2207	2.72e-05
Lacviv1|304957	Lacviv1	304957	gene_4363	Induced during mycorrhization	III	NA	NA	NA	NA	NA	NA	NA	NA	NA	PF07690	MFS_1	Carbohydrate transport and metabolism	Transporter/Permease	Unknown transporter	OG0002873	3.10232	2.79609	3.29236	85.5665	66.4018	85.325	4.98765	9.14e-33
Lacviv1|304986	Lacviv1	304986	gene_4362	Induced during mycorrhization	III	NA	NA	NA	NA	NA	NA	NA	NA	NA	PF07690	MFS_1	Carbohydrate transport and metabolism	Transporter/Permease	Unknown transporter	OG0005825	1.18993	1.87724	1.87026	41.0931	121.454	83.8443	5.75673	5.71e-24
Lacviv1|41473	Lacviv1	41473	gene_301	Induced during mycorrhization	III	NA	NA	NA	NA	NA	NA	NA	1.14.13.-	With NADH or NADPH as one donor, and incorporation of one atom	PF00067	p450	Secondary metabolites biosynthesis, transport and catabolism	Cytochrome p450		OG0007349	16.6975	16.6396	14.705	147.939	128.803	167.478	3.31848	4.43e-12
Lacviv1|70782	Lacviv1	70782	gene_2929	Induced during mycorrhization	III	NA	NA	NA	NA	NA	NA	NA	NA	NA	PF00083,PF07690	Sugar_tr,MFS_1	General function prediction only	Transporter/Permease	Sugar transporter	OG0007392	7.02293	8.03367	7.05834	134.659	97.2157	153.42	4.72362	5.58e-29
Lacviv1|761494	Lacviv1	761494	gene_4583	Induced during mycorrhization	III	NA	NA	NA	NA	NA	NA	NA	1.3.1.33	Protochlorophyllide reductase.	PF00106,PF13561,PF08659,PF01370,PF16363,PF01488	adh_short,adh_short_C2,KR,Epimerase,GDP_Man_Dehyd,Shikimate_DH	Secondary metabolites biosynthesis, transport and catabolism	Other function	Protochlorophyllide reductase.	OG0000400	34.9906	29.0555	23.633	111.158	274.945	381.668	3.7823	3.75e-09
Lacviv1|889894	Lacviv1	889894	gene_742	Induced during mycorrhization	III	NA	NA	NA	NA	NA	NA	NA	NA	NA	PF07247	AATase	NA	Other function	Alcohol acetyltransferase	OG0008160	30.0159	31.931	16.4123	56.0679	160.134	80.5668	2.60261	0.00291094
Lacviv1|923260	Lacviv1	923260	gene_6264	Induced during mycorrhization	III	Secreted	NA	AA14	Hemicellulose	NA	NA	NA	NA	NA	NA	NA	NA	CAZyme	Holds a AA domain	OG0008626	35.8127	34.9191	35.0096	233.204	171.846	219.428	2.74173	5.08e-05
[truncated: 153 more rows]
