# Supplementary material for: Transcriptome Profiling Reveals Differential Gene Expression of Secreted Proteases and Highly Specific Gene Repertoires Involved in Lactarius–Pinus Symbioses
Source: Front Plant Sci. 2021 Aug 19;12:714393. doi: 10.3389/fpls.2021.714393 (PMC8417538; doi:10.3389/fpls.2021.714393)
Supplement: Supplementary Table 4 — Lactarius genes repressed during Mycorrhization. Data are split in different sheets according to the species: L. akahatsu (Sheet S4A), L. deliciosus (Sheet S4B), L. sanguifluus (Sheet S4C), and L. vividus (Sheet S4D); gene functional annotation (secretion, lipase, CAZyme, lectin, subtilase, EC number, PFAM domain, KOG, cluster ID, and orhogroup ID) and expression (TPM) in each sample are also included in this table. [file Table_4.XLSX]

## Sheet: Table S4-Title
Table S4. Lactarius genes repressed during Mycorrhization. Data are split in different sheets according to the species: L. akahatsu (Sheet S4A), L. deliciosus (Sheet S4B), L. sanguifluus (Sheet S4C) and L. vividus (Sheet S4D); gene functional annotation (secretion, lipase, CAZyme, lectin, subtilase, EC number, PFAM domain, KOG, cluster ID, orhogroup ID) and expression (TPM) in each sample are als…

## Sheet: Sheet S4A-L.akahatsu
Gene ID (this study)	JGI species ID	JGI protein ID	JGI gene ID	Gene regulation (genes are considered as differentially expressed if LFC > 2 or <-2 and p.value adjusted < 0.05)	Cluster in supplementary Figure S5	Secretion	Lipase	CAZyme family	CAZyme_substrate. PCW: Plant cell wall degrading enzyme.	Lectin	Subtilase family	Subtilase conservation. Subtilase missing one of their three catalytic regions were labelled as partial. If at least one of the catalytic region lack a perfect match to the pattern described in the litterature, the subtilase was labelled as containing a non-canonical region.	Enzyme Commission number	Enzyme Commission number description	PFAM domain ID	PFAM domain short description	KOG annotation	Highlighted functions	Highlighted functions additionnal details	Orthogroup ID	expression (TPM) in sample QPct1. (FLM)	expression (TPM) in sample QPct2. (FLM)	expression (TPM) in sample QPct3. (FLM)	expression (TPM) in sample QPtab1 (mycorrhiza)	expression (TPM) in sample QPtab2 (mycorrhiza)	expression (TPM) in sample QPtab3 (mycorrhiza)	log2FoldChange (LFC) between FLM and mycorrhiza	adjusted p.value
Lacaka1|1104687	Lacaka1	1104687	gene_6774	Repressed during mycorrhization	VIII	NA	NA	NA	NA	NA	NA	NA	NA	NA	NA	NA	NA	Unknown	Unknown	OG0001409	18.4524	25.0323	27.6469	2.89823	1.87728	2.43368	-3.20302	0.00798862
Lacaka1|1791514	Lacaka1	1791514	gene_2603	Repressed during mycorrhization	VIII	NA	NA	NA	NA	NA	NA	NA	NA	NA	NA	NA	NA	Unknown	Unknown	OG0005246	247.961	309.852	309.814	43.7007	54.4847	54.8202	-2.72218	2.66e-09
Lacaka1|1815411	Lacaka1	1815411	gene_6586	Repressed during mycorrhization	VIII	NA	NA	NA	NA	NA	NA	NA	NA	NA	NA	NA	NA	Unknown	Unknown	OG0005763	219.014	243.735	186.566	3.96447	2.06575	4.16675	-5.94347	3.68e-46
Lacaka1|1815750	Lacaka1	1815750	gene_6445	Repressed during mycorrhization	VIII	NA	NA	NA	NA	NA	NA	NA	NA	NA	NA	NA	NA	Unknown	Unknown	OG0013990	16.0208	13.2567	16.5008	1.42862	2.31019	1.30278	-3.23981	1.28e-22
Lacaka1|1817065	Lacaka1	1817065	gene_9901	Repressed during mycorrhization	VIII	NA	NA	NA	NA	NA	NA	NA	NA	NA	NA	NA	NA	Unknown	Unknown	OG0009774	105.051	108.894	97.5442	19.4596	14.897	17.1309	-2.55545	0.014263
Lacaka1|1817779	Lacaka1	1817779	gene_6703	Repressed during mycorrhization	VIII	NA	NA	NA	NA	NA	NA	NA	NA	NA	PF01494	FAD_binding_3	Energy production and conversion ; General function prediction only	Unknown	Unknown	OG0005802	1707.27	1809.4	1913.15	42.1099	35.0582	37.3927	-5.63798	3.77e-244
Lacaka1|1906696	Lacaka1	1906696	gene_11926	Repressed during mycorrhization	VIII	NA	NA	NA	NA	NA	NA	NA	NA	NA	PF13637,PF12796,PF05729,PF13857	Ank_4,Ank_2,NACHT,Ank_5	Chromatin structure and dynamics ; Transcription	Other function	NACHT	OG0003534	1163.68	1330.46	1336.72	225.585	181.144	189.215	-2.88931	8.96e-14
Lacaka1|1944240	Lacaka1	1944240	gene_4847	Repressed during mycorrhization	VIII	NA	NA	NA	NA	NA	NA	NA	NA	NA	NA	NA	NA	Unknown	Unknown	OG0003740	63.7852	76.8454	78.0955	14.756	12.4942	11.9933	-2.61492	0.000861089
Lacaka1|1947403	Lacaka1	1947403	gene_7822	Repressed during mycorrhization	VIII	SSP	NA	NA	NA	NA	NA	NA	NA	NA	NA	NA	NA	Unknown	Unknown	OG0003784	4626.88	4508.61	4193.61	83.4218	62.6777	63.0085	-5.56199	1.16e-192
Lacaka1|1948416	Lacaka1	1948416	gene_8222	Repressed during mycorrhization	VIII	NA	NA	NA	NA	NA	NA	NA	NA	NA	NA	NA	NA	Unknown	Unknown	OG0007884	81.1908	79.6556	79.1396	6.32692	5.33985	5.18078	-3.82053	3.7e-52
Lacaka1|200618	Lacaka1	200618	gene_4073	Repressed during mycorrhization	VIII	NA	NA	NA	NA	NA	NA	NA	NA	NA	PF17109	Goodbye	NA	Other function	Holds a Goodbye domain	OG0000393	111.934	129.613	118.01	29.1739	21.8491	18.2122	-2.61155	0.000496183
Lacaka1|2106865	Lacaka1	2106865	gene_11106	Repressed during mycorrhization	VIII	NA	NA	NA	NA	NA	NA	NA	NA	NA	PF17109	Goodbye	NA	Other function	Holds a Goodbye domain	OG0010083	55.4725	61.473	62.8087	3.46563	3.78363	2.35263	-4.54454	5.16e-34
Lacaka1|253336	Lacaka1	253336	gene_3509	Repressed during mycorrhization	VIII	NA	NA	NA	NA	NA	NA	NA	NA	NA	NA	NA	NA	Unknown	Unknown	OG0008645	34.5043	32.5472	33.4319	4.29817	3.06631	3.79184	-3.23561	4.64e-09
Lacaka1|502787	Lacaka1	502787	gene_1788	Repressed during mycorrhization	VIII	NA	NA	NA	NA	NA	NA	NA	NA	NA	NA	NA	NA	Unknown	Unknown	OG0010193	111.12	125.535	110.58	4.41759	5.07487	4.97695	-3.66513	1.17e-08
Lacaka1|576512	Lacaka1	576512	gene_4763	Repressed during mycorrhization	VIII	NA	NA	NA	NA	NA	NA	NA	NA	NA	NA	NA	NA	Unknown	Unknown	OG0004246	397.589	486.57	490.213	69.0816	87.4496	59.4909	-2.82792	3.72e-07
Lacaka1|688194	Lacaka1	688194	gene_6311	Repressed during mycorrhization	VIII	NA	NA	NA	NA	NA	NA	NA	NA	NA	NA	NA	NA	Unknown	Unknown	OG0011789	69.2005	70.2822	72.4282	10.629	10.0986	9.07116	-2.97243	2.2e-13
Lacaka1|705800	Lacaka1	705800	gene_7928	Repressed during mycorrhization	VIII	NA	NA	NA	NA	NA	NA	NA	NA	NA	NA	NA	NA	Unknown	Unknown	OG0000071	8.18786	12.077	10.3221	1.01039	0.166757	0.474537	-4.37758	0.000157923
Lacaka1|867949	Lacaka1	867949	gene_7821	Repressed during mycorrhization	VIII	SSP	NA	NA	NA	NA	NA	NA	NA	NA	NA	NA	NA	Unknown	Unknown	OG0010231	110.641	150.647	99.2713	18.2367	12.3351	10.2859	-5.83542	1.03e-144
Lacaka1|MSTRG.2027	Lacaka1	NA	MSTRG.2027	Repressed during mycorrhization	VIII	NA	NA	NA	NA	NA	NA	NA	NA	NA	NA	NA	NA	Unknown	Unknown	OG0009037	35.2648	36.9537	34.892	7.6247	6.87289	6.89336	-2.52752	0.0205941
Lacaka1|MSTRG.5403	Lacaka1	NA	MSTRG.5403	Repressed during mycorrhization	VIII	NA	NA	NA	NA	NA	NA	NA	NA	NA	NA	NA	NA	Unknown	Unknown	OG0009059	175.298	219.611	206.209	23.3196	16.8673	16.0863	-3.73778	1.13e-25
Lacaka1|MSTRG.6595	Lacaka1	NA	MSTRG.6595	Repressed during mycorrhization	VIII	NA	NA	NA	NA	NA	NA	NA	NA	NA	NA	NA	NA	Unknown	Unknown	OG0004350	16.3534	19.6063	18.8733	3.70472	3.03415	2.65721	-2.88554	0.00124577
Lacaka1|1185610	Lacaka1	1185610	gene_2500	Repressed during mycorrhization	XII	NA	NA	NA	NA	NA	NA	NA	NA	NA	PF00011	HSP20	Posttranslational modification, protein turnover, chaperones	Other function	heat shock protein Hsp20 / chaperones	OG0004694	0.328339	30.3427	58.571	0.156047	0	0	-2.82198	2.83e-08
Lacaka1|1201650	Lacaka1	1201650	gene_2622	Repressed during mycorrhization	XII	NA	NA	NA	NA	NA	NA	NA	NA	NA	PF13302,PF00583,PF13673,PF13420,PF13508,PF08445	Acetyltransf_3,Acetyltransf_1,Acetyltransf_10,Acetyltransf_4,Acetyltransf_7,FR47	Cell wall/membrane/envelope biogenesis	Transcription factor	Acetyltransferase	OG0004712	82.394	76.4838	75.7953	10.6206	7.85462	7.73851	-3.34516	2.78e-11
Lacaka1|1220127	Lacaka1	1220127	gene_8630	Repressed during mycorrhization	XII	NA	NA	NA	NA	NA	NA	NA	NA	NA	NA	NA	NA	Unknown	Unknown	OG0002468	93.0993	104.027	91.8144	16.7695	19.8476	13.7548	-2.67457	1.07e-05
Lacaka1|1307899	Lacaka1	1307899	gene_2996	Repressed during mycorrhization	XII	NA	NA	NA	NA	NA	NA	NA	NA	NA	NA	NA	NA	Unknown	Unknown	OG0000169	31.1819	29.203	27.2823	4.47292	5.26197	4.65685	-2.81461	9.52e-07
Lacaka1|1354569	Lacaka1	1354569	gene_9066	Repressed during mycorrhization	XII	NA	NA	NA	NA	NA	NA	NA	NA	NA	NA	NA	NA	Unknown	Unknown	OG0002516	40.2588	104.32	51.9871	10.962	8.36308	59.3351	-2.63367	0.034834
Lacaka1|136776	Lacaka1	136776	gene_10560	Repressed during mycorrhization	XII	NA	NA	NA	NA	NA	NA	NA	NA	NA	NA	NA	NA	Unknown	Unknown	OG0002523	129.008	178.606	172.731	10.1293	7.96142	9.13838	-4.19425	3.3e-42
Lacaka1|1456584	Lacaka1	1456584	gene_9467	Repressed during mycorrhization	XII	NA	NA	NA	NA	NA	NA	NA	NA	NA	PF13598	DUF4139	NA	Unknown	Unknown	OG0009594	170.125	194.014	188.483	38.7739	35.771	32.3901	-2.57891	2.92e-05
Lacaka1|1528024	Lacaka1	1528024	gene_2858	Repressed during mycorrhization	XII	NA	NA	NA	NA	NA	NA	NA	NA	NA	PF00651	BTB	General function prediction only ; Signal transduction mechanisms	Transcription factor	Holds a BTB domain	OG0004930	158.31	223.543	218.073	20.3606	20.5422	16.848	-3.18511	7.05e-10
Lacaka1|1539508	Lacaka1	1539508	gene_2954	Repressed during mycorrhization	XII	NA	NA	NA	NA	NA	NA	NA	NA	NA	PF00651	BTB	NA	Transcription factor	Holds a BTB domain	OG0004945	278.116	336.73	315.018	43.5233	31.2854	28.1911	-3.3315	5.85e-15
Lacaka1|1758902	Lacaka1	1758902	gene_7145	Repressed during mycorrhization	XII	NA	NA	NA	NA	NA	NA	NA	NA	NA	PF04479	RTA1	NA	Other function	RTA1	OG0002622	16.0813	14.4409	15.1528	2.93956	4.0426	1.7673	-2.46542	0.011674
Lacaka1|1759271	Lacaka1	1759271	gene_9471	Repressed during mycorrhization	XII	NA	NA	NA	NA	NA	NA	NA	NA	NA	NA	NA	NA	Unknown	Unknown	OG0005006	227.674	281.005	253.755	26.0427	20.5269	25.6866	-3.78672	3.85e-39
Lacaka1|1801044	Lacaka1	1801044	gene_6775	Repressed during mycorrhization	XII	NA	NA	NA	NA	NA	NA	NA	NA	NA	NA	NA	NA	Unknown	Unknown	OG0000641	19.8791	23.2212	28.8327	4.84126	3.19016	3.73074	-2.8812	0.0249422
Lacaka1|1802606	Lacaka1	1802606	gene_10162	Repressed during mycorrhization	XII	NA	NA	NA	NA	NA	NA	NA	1.14.14.1	Unspecific monooxygenase.	PF00067	p450	Lipid transport and metabolism ; Secondary metabolites biosynthesis, transport and catabolism	Cytochrome p450		OG0000114	131.508	122.258	163.312	17.1209	10.8057	8.12515	-3.6437	7.71e-33
Lacaka1|1814086	Lacaka1	1814086	gene_2770	Repressed during mycorrhization	XII	NA	NA	NA	NA	NA	NA	NA	NA	NA	NA	NA	NA	Unknown	Unknown	OG0001049	35.3118	34.6867	30.6012	0.364766	0.89093	1.90336	-5.04065	2.35e-17
Lacaka1|1818125	Lacaka1	1818125	gene_8621	Repressed during mycorrhization	XII	NA	NA	NA	NA	NA	NA	NA	NA	NA	NA	NA	NA	Unknown	Unknown	OG0000224	48.0507	50.6763	49.5542	3.76708	6.48058	4.69453	-3.45281	4.95e-15
Lacaka1|1818424	Lacaka1	1818424	gene_8768	Repressed during mycorrhization	XII	NA	NA	NA	NA	NA	NA	NA	3.4.23.5	Cathepsin D.	PF00026,PF14543	Asp,TAXi_N	Posttranslational modification, protein turnover, chaperones	Protease	Pepsin (A1)	OG0014042	51.9799	53.3427	47.34	5.71093	4.92034	4.91973	-3.35562	7.95e-18
Lacaka1|1819495	Lacaka1	1819495	gene_9874	Repressed during mycorrhization	XII	NA	NA	NA	NA	NA	NA	NA	NA	NA	PF01184	Grp1_Fun34_YaaH	NA	Transporter/Permease	Unknown transporter	OG0001665	24.5991	24.898	20.8475	4.52465	3.30054	3.81067	-2.81452	0.00104704
Lacaka1|1825226	Lacaka1	1825226	gene_188	Repressed during mycorrhization	XII	NA	NA	NA	NA	NA	NA	NA	NA	NA	PF06140	Ifi-6-16	NA	Other function	IFI-6-16	OG0001080	790.121	787.404	787.15	75.2575	67.8091	75.0598	-3.29252	1.87e-32
Lacaka1|1826797	Lacaka1	1826797	gene_476	Repressed during mycorrhization	XII	NA	NA	NA	NA	NA	NA	NA	NA	NA	NA	NA	NA	Unknown	Unknown	OG0005938	115.407	117.357	0.967342	16.5164	19.9855	15.0633	-2.89383	1.22e-11
Lacaka1|1828045	Lacaka1	1828045	gene_682	Repressed during mycorrhization	XII	NA	NA	NA	NA	NA	NA	NA	NA	NA	PF11710	Git3	NA	Other function	G protein-coupled glucose receptor	OG0005984	14.114	10.9914	11.663	2.66161	3.60706	3.57289	-3.37703	5.13e-06
Lacaka1|1858919	Lacaka1	1858919	gene_3778	Repressed during mycorrhization	XII	NA	NA	NA	NA	NA	NA	NA	NA	NA	PF03134	TB2_DP1_HVA22	Defense mechanisms	Other function	putative regulatory protein	OG0003265	184.432	205.357	177.501	38.142	15.6083	20.0633	-3.21616	8.25e-07
Lacaka1|1861825	Lacaka1	1861825	gene_6310	Repressed during mycorrhization	XII	NA	NA	NA	NA	NA	NA	NA	NA	NA	PF00656	Peptidase_C14	Cell cycle control, cell division, chromosome partitioning ; Posttranslational modification, protein turnover, chaperones	Protease	Caspase (C14)	OG0006745	88.2197	90.373	96.5411	12.862	13.3939	13.3115	-2.89225	1.69e-15
Lacaka1|1864685	Lacaka1	1864685	gene_5657	Repressed during mycorrhization	XII	NA	NA	NA	NA	NA	NA	NA	NA	NA	NA	NA	NA	Unknown	Unknown	OG0003160	255.028	247.25	237.471	74.1627	55.906	64.4398	-3.00038	7.69e-13
Lacaka1|1875760	Lacaka1	1875760	gene_10017	Repressed during mycorrhization	XII	Secreted	NA	AA3_2	PartialPCWdegradation	NA	NA	NA	1.1.99.1	Choline dehydrogenase.	PF00732,PF05199	GMC_oxred_N,GMC_oxred_C	General function prediction only	CAZyme	GMC oxidoreductase	OG0003390	243.521	226.164	222.72	32.5386	27.0008	23.6781	-3.4382	1.17e-31
Lacaka1|1932842	Lacaka1	1932842	gene_1332	Repressed during mycorrhization	XII	NA	NA	NA	NA	NA	NA	NA	NA	NA	PF05368	NmrA	NA	Other function	Transcriptional regulator	OG0003087	62.8454	51.9433	53.817	4.57959	2.63515	4.73449	-3.80782	3.86e-20
Lacaka1|1936121	Lacaka1	1936121	gene_9099	Repressed during mycorrhization	XII	SSP	NA	NA	NA	NA	NA	NA	2.1.1.100	Protein-S isoprenylcysteine O-methyltransferase.	PF04140,PF04191	ICMT,PEMT	NA	Other function	Protein-S isoprenylcysteine O-methyltransferase.	OG0007522	272.347	243.025	232.102	7.16706	6.27402	9.81577	-5.27929	1.77e-66
Lacaka1|1944133	Lacaka1	1944133	gene_7333	Repressed during mycorrhization	XII	NA	NA	NA	NA	NA	NA	NA	3.1.26.3	Ribonuclease III.	NA	NA	RNA processing and modification	Other function	Ribonuclease III.	OG0007766	69.8246	89.3006	83.1613	8.68891	4.57487	3.77806	-4.5293	6.57e-26
Lacaka1|1947618	Lacaka1	1947618	gene_7392	Repressed during mycorrhization	XII	SSP	NA	EXPN	NA	NA	NA	NA	NA	NA	PF03330	DPBB_1	NA	CAZyme	Distantly related to plant expansins	OG0007848	181.967	236.415	202.197	11.4184	9.31017	10.2979	-4.89018	1.23e-83
Lacaka1|1948013	Lacaka1	1948013	gene_6931	Repressed during mycorrhization	XII	NA	NA	NA	NA	NA	NA	NA	NA	NA	NA	NA	NA	Unknown	Unknown	OG0000784	210.596	255.556	244.201	45.5394	41.2466	36.5091	-2.72462	2.44e-07
Lacaka1|1948015	Lacaka1	1948015	gene_6933	Repressed during mycorrhization	XII	NA	NA	NA	NA	NA	NA	NA	NA	NA	NA	NA	NA	Unknown	Unknown	OG0000235	37.1491	40.8876	47.4524	5.30147	4.34679	2.68619	-3.15386	1.12e-15
Lacaka1|1952019	Lacaka1	1952019	gene_10681	Repressed during mycorrhization	XII	NA	NA	NA	NA	NA	NA	NA	NA	NA	NA	NA	NA	Unknown	Unknown	OG0001409	20.7548	24.8195	24.2111	2.4789	1.7633	2.91451	-3.19101	3.72e-07
Lacaka1|1953202	Lacaka1	1953202	gene_11210	Repressed during mycorrhization	XII	NA	NA	NA	NA	NA	NA	NA	NA	NA	NA	NA	NA	Unknown	Unknown	OG0000179	14.3379	12.6258	13.4865	1.29886	1.2228	0.71345	-3.16112	0.000170949
Lacaka1|1968431	Lacaka1	1968431	gene_13634	Repressed during mycorrhization	XII	NA	NA	NA	NA	NA	NA	NA	NA	NA	NA	NA	NA	Unknown	Unknown	OG0000389	68.85	79.8769	88.1346	4.58931	4.70338	3.87064	-4.11518	0.00963469
Lacaka1|1972652	Lacaka1	1972652	gene_3334	Repressed during mycorrhization	XII	NA	NA	NA	NA	NA	NA	NA	NA	NA	PF00656	Peptidase_C14	Cell cycle control, cell division, chromosome partitioning ; Posttranslational modification, protein turnover, chaperones	Protease	Caspase (C14)	OG0010062	157.076	171.799	137.545	9.95613	10.8928	8.3341	-3.68058	5.89e-19
Lacaka1|1984777	Lacaka1	1984777	gene_1718	Repressed during mycorrhization	XII	NA	NA	NA	NA	NA	NA	NA	NA	NA	NA	NA	NA	Unknown	Unknown	OG0002064	206.899	200.266	213.917	27.649	12.2501	13.2211	-3.6569	1.13e-13
Lacaka1|2069454	Lacaka1	2069454	gene_7745	Repressed during mycorrhization	XII	NA	NA	NA	NA	NA	NA	NA	NA	NA	PF01040	UbiA	NA	Other function	Holds a UbiA domain	OG0008338	2347.07	2143.87	2256.85	275.651	290.821	422.246	-2.75067	1.75e-05
Lacaka1|2115358	Lacaka1	2115358	gene_8926	Repressed during mycorrhization	XII	NA	NA	NA	NA	NA	NA	NA	NA	NA	NA	NA	NA	Unknown	Unknown	OG0000235	15.33	14.8611	19.594	1.91955	1.49962	0.656639	-3.53826	7.05e-12
Lacaka1|304660	Lacaka1	304660	gene_12897	Repressed during mycorrhization	XII	NA	NA	NA	NA	NA	NA	NA	NA	NA	NA	NA	NA	Unknown	Unknown	OG0000389	86.892	115.317	112.198	4.40138	5.44884	4.88558	-4.29341	8.79e-14
Lacaka1|571131	Lacaka1	571131	gene_4726	Repressed during mycorrhization	XII	SSP	NA	CBM50-CBM50	NA	NA	NA	NA	NA	NA	PF01476	LysM	NA	Other function	LysM	OG0008802	112.83	125.275	91.2861	16.7752	12.4923	11.6876	-3.77185	7.06e-25
Lacaka1|685724	Lacaka1	685724	gene_6282	Repressed during mycorrhization	XII	NA	NA	NA	NA	NA	NA	NA	2.5.1.18	Glutathione transferase.	PF13410,PF13417	GST_C_2,GST_N_3	Posttranslational modification, protein turnover, chaperones	Other function	Glutathione transferase	OG0008871	127.77	118.12	107.266	14.1555	9.18009	8.44458	-3.50278	9.76e-17
Lacaka1|712310	Lacaka1	712310	gene_13243	Repressed during mycorrhization	XII	NA	NA	NA	NA	NA	NA	NA	NA	NA	NA	NA	NA	Unknown	Unknown	OG0002870	42.2004	36.7226	35.535	2.15666	1.02624	0.957603	-5.95737	1.65e-11
Lacaka1|982301	Lacaka1	982301	gene_5198	Repressed during mycorrhization	XII	NA	NA	NA	NA	NA	NA	NA	NA	NA	PF00324	AA_permease	Amino acid transport and metabolism	Transporter/Permease	Amino acid permease	OG0014700	1.85299	1.85279	2.41895	0	1.47587	0	-3.31921	7.52e-06
Lacaka1|MSTRG.2967	Lacaka1	NA	MSTRG.2967	Repressed during mycorrhization	XII	NA	NA	NA	NA	NA	NA	NA	NA	NA	NA	NA	NA	Unknown	Unknown	OG0011874	1077.8	717.569	805.88	151.534	106.068	108.81	-3.20637	1.19e-08
Lacaka1|1220513	Lacaka1	1220513	gene_8644	Repressed during mycorrhization	IX	NA	NA	NA	NA	NA	NA	NA	NA	NA	PF01699	Na_Ca_ex	Inorganic ion transport and metabolism	Transporter/Permease	Sodium/calcium exchanger	OG0004718	7.10973	6.8165	6.96545	0.410994	0.325652	0.206595	-3.88193	3.54e-07
Lacaka1|1352451	Lacaka1	1352451	gene_9050	Repressed during mycorrhization	IX	NA	NA	NA	NA	NA	NA	NA	NA	NA	NA	NA	NA	Unknown	Unknown	OG0000655	151.303	230.972	168.241	13.0151	11.6012	10.1643	-3.79231	1.5e-18
Lacaka1|1357501	Lacaka1	1357501	gene_9088	Repressed during mycorrhization	IX	NA	NA	NA	NA	NA	NA	NA	NA	NA	NA	NA	NA	Unknown	Unknown	OG0011248	234.696	218.562	232.794	31.469	30.4519	28.9906	-2.99598	2.9e-10
Lacaka1|1496774	Lacaka1	1496774	gene_9624	Repressed during mycorrhization	IX	NA	NA	NA	NA	NA	NA	NA	NA	NA	NA	NA	NA	Unknown	Unknown	OG0013851	280.939	301.704	289.196	49.1623	45.7359	56.0075	-2.63727	9.55e-09
Lacaka1|1558341	Lacaka1	1558341	gene_10855	Repressed during mycorrhization	IX	Secreted	NA	NA	NA	NA	NA	NA	NA	NA	NA	NA	NA	Unknown	Unknown	OG0000969	33.3658	39.2252	36.6833	3.21469	2.42377	3.00078	-4.59727	2.99e-07
Lacaka1|1814341	Lacaka1	1814341	gene_4553	Repressed during mycorrhization	IX	NA	NA	NA	NA	NA	NA	NA	NA	NA	NA	NA	NA	Unknown	Unknown	OG0005746	374.404	480.438	452.346	37.7593	52.1994	34.9903	-3.47158	8.77e-20
Lacaka1|1828089	Lacaka1	1828089	gene_688	Repressed during mycorrhization	IX	SSP	NA	NA	NA	NA	NA	NA	NA	NA	NA	NA	NA	Unknown	Unknown	OG0001693	605.659	616.997	510.88	12.4323	15.9225	12.1874	-5.30586	1.61e-107
Lacaka1|1840979	Lacaka1	1840979	gene_2694	Repressed during mycorrhization	IX	NA	NA	NA	NA	NA	NA	NA	NA	NA	PF01381,PF13560	HTH_3,HTH_31	NA	Transcription factor	Unknown	OG0009871	4290.84	4441.1	4322.75	803.392	975.398	729.826	-2.30381	0.0284962
Lacaka1|1841224	Lacaka1	1841224	gene_2737	Repressed during mycorrhization	IX	NA	NA	NA	NA	NA	NA	NA	NA	NA	NA	NA	NA	Unknown	Unknown	OG0003135	209.088	205.179	181.375	24.4311	18.1964	19.0126	-2.92878	8.35e-08
Lacaka1|1846196	Lacaka1	1846196	gene_3998	Repressed during mycorrhization	IX	NA	NA	NA	NA	NA	NA	NA	NA	NA	NA	NA	NA	Unknown	Unknown	OG0001103	222.804	238.322	202.12	4.90264	4.21897	4.29092	-5.574	2.49e-82
Lacaka1|1863608	Lacaka1	1863608	gene_5841	Repressed during mycorrhization	IX	NA	NA	NA	NA	NA	NA	NA	NA	NA	NA	NA	NA	Unknown	Unknown	OG0000522	20.8159	16.0689	12.2471	2.14526	2.99523	0	-3.36486	0.00766227
Lacaka1|1888115	Lacaka1	1888115	gene_9966	Repressed during mycorrhization	IX	NA	NA	NA	NA	NA	NA	NA	NA	NA	NA	NA	NA	Unknown	Unknown	OG0011529	6.84763	7.42324	6.41875	0.584163	0.24276	0	-5.20641	0.00912899
Lacaka1|1942001	Lacaka1	1942001	gene_2051	Repressed during mycorrhization	IX	SSP	NA	NA	NA	NA	NA	NA	NA	NA	NA	NA	NA	Unknown	Unknown	OG0014349	108.817	124.535	119.756	2.69428	7.88943	4.80907	-5.53555	2.61e-107
Lacaka1|1945879	Lacaka1	1945879	gene_7092	Repressed during mycorrhization	IX	NA	NA	NA	NA	NA	NA	NA	NA	NA	NA	NA	NA	Unknown	Unknown	OG0006734	85.379	90.2553	83.513	8.35308	8.19795	13.6405	-3.01638	3.39e-05
Lacaka1|1983099	Lacaka1	1983099	gene_1452	Repressed during mycorrhization	IX	NA	NA	NA	NA	NA	NA	NA	NA	NA	PF06140	Ifi-6-16	NA	Other function	IFI-6-16	OG0002062	0	0	31.5866	0	3.6111	0	-2.90665	1.03e-06
Lacaka1|1985862	Lacaka1	1985862	gene_6392	Repressed during mycorrhization	IX	NA	NA	NA	NA	NA	NA	NA	NA	NA	NA	NA	Signal transduction mechanisms	Unknown	Unknown	OG0010070	110.077	141.838	140.888	18.2665	18.0815	20.7419	-3.06464	3.34e-09
Lacaka1|2003758	Lacaka1	2003758	gene_8931	Repressed during mycorrhization	IX	NA	NA	NA	NA	NA	NA	NA	NA	NA	NA	NA	NA	Unknown	Unknown	OG0000564	32.2302	25.9133	29.9991	15.1055	13.4398	12.4769	-2.47196	0.00127057
Lacaka1|2105427	Lacaka1	2105427	gene_8801	Repressed during mycorrhization	IX	NA	NA	NA	NA	NA	NA	NA	NA	NA	NA	NA	NA	Unknown	Unknown	OG0008500	5.82066	6.56786	7.59946	1.10419	1.07204	0.516226	-5.06699	0.000328507
Lacaka1|2113950	Lacaka1	2113950	gene_6388	Repressed during mycorrhization	IX	NA	NA	NA	NA	NA	NA	NA	NA	NA	NA	NA	NA	Unknown	Unknown	OG0014521	15.2998	22.3	17.8318	6.3662	5.17585	4.59709	-4.39137	3.58e-28
Lacaka1|549349	Lacaka1	549349	gene_11872	Repressed during mycorrhization	IX	NA	NA	NA	NA	NA	NA	NA	NA	NA	NA	NA	NA	Unknown	Unknown	OG0011776	41.013	51.2255	55.1317	12.4231	11.2677	11.8121	-2.48496	0.00303031
Lacaka1|664745	Lacaka1	664745	gene_7100	Repressed during mycorrhization	IX	SSP	NA	NA	NA	NA	NA	NA	NA	NA	PF01185	Hydrophobin	NA	Other function	Hydrophobin	OG0010210	26.1701	42.8278	30.9242	4.21646	2.68192	0.410088	-3.89699	5.08e-05
Lacaka1|688839	Lacaka1	688839	gene_6309	Repressed during mycorrhization	IX	NA	NA	NA	NA	NA	NA	NA	NA	NA	NA	NA	NA	Unknown	Unknown	OG0011790	71.8266	61.1236	86.9694	15.4022	11.4276	11.5255	-2.60078	0.00020536
Lacaka1|820614	Lacaka1	820614	gene_11284	Repressed during mycorrhization	IX	NA	NA	NA	NA	NA	NA	NA	NA	NA	NA	NA	NA	Unknown	Unknown	OG0001862	34.1018	28.7852	39.2927	9.49542	5.93785	6.26176	-3.21861	2.83e-06
Lacaka1|850312	Lacaka1	850312	gene_9929	Repressed during mycorrhization	IX	NA	NA	NA	NA	NA	NA	NA	NA	NA	NA	NA	NA	Unknown	Unknown	OG0002240	8.43469	13.7202	12.045	1.17363	1.09609	0.605808	-4.15843	5.59e-06
Lacaka1|895629	Lacaka1	895629	gene_7396	Repressed during mycorrhization	IX	NA	NA	NA	NA	NA	NA	NA	NA	NA	NA	NA	NA	Unknown	Unknown	OG0004303	201.389	212.589	228.973	48.7333	45.2748	48.2381	-2.37005	0.00385193
Lacaka1|MSTRG.9347	Lacaka1	NA	MSTRG.9347	Repressed during mycorrhization	IX	NA	NA	NA	NA	NA	NA	NA	NA	NA	NA	NA	NA	Unknown	Unknown	OG0014859	71.3781	67.0316	61.3551	9.59295	14.0886	13.309	-2.52705	0.00656897
Lacaka1|MSTRG.9699	Lacaka1	NA	MSTRG.9699	Repressed during mycorrhization	IX	NA	NA	NA	NA	NA	NA	NA	NA	NA	NA	NA	NA	Unknown	Unknown	OG0000969	34.2618	38.2895	37.4242	4.18862	3.52737	3.67263	-3.8738	1.43e-18
Lacaka1|1281460	Lacaka1	1281460	gene_8750	Repressed during mycorrhization	X	NA	NA	NA	NA	NA	NA	NA	1.3.1.33	Protochlorophyllide reductase.	PF00106,PF13561,PF08659,PF01370	adh_short,adh_short_C2,KR,Epimerase	Secondary metabolites biosynthesis, transport and catabolism	Other function	Protochlorophyllide reductase.	OG0000204	12.1201	5.32335	5.53142	0	0.310159	0.359244	-4.62877	3.61e-28
Lacaka1|1409270	Lacaka1	1409270	gene_1979	Repressed during mycorrhization	X	Secreted	NA	NA	NA	NA	NA	NA	NA	NA	NA	NA	NA	Unknown	Unknown	OG0004826	207.908	210.408	189.532	31.3966	55.5195	53.3837	-2.69661	1.07e-11
Lacaka1|1503540	Lacaka1	1503540	gene_9977	Repressed during mycorrhization	X	NA	NA	NA	NA	NA	NA	NA	NA	NA	PF00071,PF08477,PF00025	Ras,Roc,Arf	Intracellular trafficking, secretion, and vesicular transport ; Signal transduction mechanisms	Other function	small GTP-binding protein	OG0002556	236.708	253.737	270.195	45.1852	22.1092	26.9101	-3.10859	5.73e-06
Lacaka1|1767576	Lacaka1	1767576	gene_57	Repressed during mycorrhization	X	NA	NA	NA	NA	NA	NA	NA	NA	NA	PF01285	TEA	NA	Transcription factor	Holds a TEA domain	OG0005026	320.856	508.623	484.676	89.169	36.5636	43.7404	-3.17578	0.0290515
Lacaka1|1792122	Lacaka1	1792122	gene_3002	Repressed during mycorrhization	X	NA	NA	NA	NA	NA	NA	NA	NA	NA	NA	NA	NA	Unknown	Unknown	OG0000994	214.082	209.922	223.044	22.3781	21.2067	24.1496	-3.27793	3.94e-30
Lacaka1|1792527	Lacaka1	1792527	gene_2035	Repressed during mycorrhization	X	NA	NA	NA	NA	NA	NA	NA	1.1.1.65	Pyridoxine 4-dehydrogenase.	PF00248	Aldo_ket_red	Energy production and conversion	Other function	Aldo/keto reductase	OG0005293	218.321	157.757	169.488	22.862	27.1789	28.5774	-2.9551	1.4e-12
Lacaka1|1797834	Lacaka1	1797834	gene_3872	Repressed during mycorrhization	X	SSP	NA	NA	NA	NA	NA	NA	NA	NA	NA	NA	NA	Unknown	Unknown	OG0002778	2496.95	2328.64	2234.73	137.954	173.238	130.584	-4.34959	1.23e-108
Lacaka1|1830367	Lacaka1	1830367	gene_1637	Repressed during mycorrhization	X	NA	NA	NA	NA	NA	NA	NA	5.4.2.8	Phosphomannomutase.	PF03332	PMM	Lipid transport and metabolism	Other function	Phosphomannomutase.	OG0006050	141.751	147.164	146.468	18.6831	11.7213	10.6893	-4.00353	7.28e-18
Lacaka1|1837488	Lacaka1	1837488	gene_3101	Repressed during mycorrhization	X	NA	NA	NA	NA	NA	NA	NA	1.1.1.22	UDP-glucose 6-dehydrogenase.	PF03721,PF03720,PF00984	UDPG_MGDP_dh_N,UDPG_MGDP_dh_C,UDPG_MGDP_dh	Carbohydrate transport and metabolism ; Signal transduction mechanisms	Other function	UDP-glucose 6-dehydrogenase	OG0006275	391.362	393.076	343.194	42.8876	34.8356	44.639	-3.3761	4.25e-29
Lacaka1|1841632	Lacaka1	1841632	gene_2800	Repressed during mycorrhization	X	NA	NA	NA	NA	NA	NA	NA	6.1.1.22	Asparagine--tRNA ligase.	PF00152,PF01336	tRNA-synt_2,tRNA_anti-codon	Translation, ribosomal structure and biogenesis	Other function	tRNA ligase	OG0003136	187.174	201.24	213.803	32.8041	28.3759	38.0964	-2.69147	1.08e-05
Lacaka1|1845612	Lacaka1	1845612	gene_5094	Repressed during mycorrhization	X	NA	NA	NA	NA	NA	NA	NA	NA	NA	PF01176	eIF-1a	Translation, ribosomal structure and biogenesis	Other function	Translation initiation factor	OG0001738	1289.86	1459.09	951.263	212.749	220.056	200.28	-2.55461	2.09e-11
Lacaka1|1849828	Lacaka1	1849828	gene_3689	Repressed during mycorrhization	X	NA	NA	NA	NA	NA	NA	NA	NA	NA	PF00248	Aldo_ket_red	General function prediction only	Other function	Aldo/keto reductase	OG0003195	1359.09	1263.2	1249.5	186.875	208.814	189.265	-2.88419	1.18e-16
Lacaka1|1852904	Lacaka1	1852904	gene_6541	Repressed during mycorrhization	X	NA	NA	NA	NA	NA	NA	NA	NA	NA	PF00067	p450	Secondary metabolites biosynthesis, transport and catabolism	Cytochrome p450		OG0001111	271.304	256.597	213.758	35.9961	38.9735	33.7922	-3.06448	5.59e-13
Lacaka1|1863421	Lacaka1	1863421	gene_5802	Repressed during mycorrhization	X	NA	NA	NA	NA	NA	NA	NA	4.1.2.13	Fructose-bisphosphate aldolase.	PF01116	F_bP_aldolase	Carbohydrate transport and metabolism	Other function	Fructose-bisphosphate aldolase.	OG0006776	1421.8	1711.67	1578.26	425.626	309.331	366.434	-2.39372	0.0269869
Lacaka1|1878607	Lacaka1	1878607	gene_8440	Repressed during mycorrhization	X	NA	NA	NA	NA	NA	NA	NA	NA	NA	PF08740,PF00004	BCS1_N,AAA	Posttranslational modification, protein turnover, chaperones	Other function	mitochondrial ATPase	OG0001827	218.101	236.582	231.353	27.2514	41.9524	26.5145	-3.00729	1.36e-09
Lacaka1|1897365	Lacaka1	1897365	gene_11380	Repressed during mycorrhization	X	NA	NA	NA	NA	NA	NA	NA	NA	NA	PF00005,PF02463	ABC_tran,SMC_N	Intracellular trafficking, secretion, and vesicular transport	Other function	Structural maintenance of chromosomes protein	OG0003509	27.7875	35.1139	36.1416	0.996441	2.58688	1.92552	-4.21118	8.97e-24
Lacaka1|1931824	Lacaka1	1931824	gene_259	Repressed during mycorrhization	X	NA	NA	NA	NA	NA	NA	NA	NA	NA	PF00806	PUF	Translation, ribosomal structure and biogenesis	Other function	PUF	OG0007211	19.4816	26.7686	20.1654	3.1247	3.80915	4.25488	-2.51725	0.00658181
Lacaka1|1932660	Lacaka1	1932660	gene_1076	Repressed during mycorrhization	X	NA	NA	NA	NA	NA	NA	NA	NA	NA	NA	NA	NA	Unknown	Unknown	OG0007271	338.4	300.164	295.662	51.665	58.1919	72.4129	-2.46579	0.00433508
Lacaka1|1933624	Lacaka1	1933624	gene_2755	Repressed during mycorrhization	X	NA	NA	NA	NA	NA	NA	NA	NA	NA	PF01154,PF08540	HMG_CoA_synt_N,HMG_CoA_synt_C	Lipid transport and metabolism	Other function	Hydroxymethylglutaryl-coenzyme A synthase	OG0001908	696.45	723.159	697.035	115.209	123.694	146.209	-2.60012	1.04e-06
Lacaka1|1936561	Lacaka1	1936561	gene_9649	Repressed during mycorrhization	X	NA	NA	NA	NA	NA	NA	NA	NA	NA	PF17168,PF16335,PF08760	DUF5127,DUF4965,DUF1793	NA	Unknown	Unknown	OG0007539	19.0641	13.9137	17.8107	1.7287	2.42939	2.24372	-2.70961	7.51e-06
Lacaka1|1937192	Lacaka1	1937192	gene_11121	Repressed during mycorrhization	X	NA	NA	NA	NA	NA	NA	NA	NA	NA	PF07690	MFS_1	Carbohydrate transport and metabolism	Transporter/Permease	Unknown transporter	OG0003676	730.767	656.591	744.991	56.4662	24.8784	29.7043	-4.36283	2.96e-08
Lacaka1|1939845	Lacaka1	1939845	gene_1441	Repressed during mycorrhization	X	NA	NA	NA	NA	NA	NA	NA	3.5.1.-	In linear amides.	PF07687,PF01546	M20_dimer,Peptidase_M20	NA	Protease	Carboxypeptidase (M20)	OG0007616	172.2	114.584	132.936	9.31379	6.31358	6.6921	-4.08791	1.27e-24
Lacaka1|1942041	Lacaka1	1942041	gene_2098	Repressed during mycorrhization	X	NA	NA	NA	NA	NA	NA	NA	NA	NA	PF00010	HLH	NA	Transcription factor	Putative transcription factor	OG0007690	5236.19	5712.9	5768.73	1026.66	935.007	992.221	-2.62183	2.14e-12
Lacaka1|1944305	Lacaka1	1944305	gene_4924	Repressed during mycorrhization	X	NA	NA	AA2	Lignin	NA	NA	NA	1.11.1.5	Cytochrome-c peroxidase.	PF11895,PF00141	Peroxidase_ext,peroxidase	NA	CAZyme	Class II peroxidase	OG0000776	178.672	207.888	184.604	1.11144	0	1.09021	-7.22171	2.58e-196
Lacaka1|1944657	Lacaka1	1944657	gene_4383	Repressed during mycorrhization	X	NA	NA	NA	NA	NA	NA	NA	NA	NA	PF00005,PF13304,PF02463,PF13175	ABC_tran,AAA_21,SMC_N,AAA_15	Intracellular trafficking, secretion, and vesicular transport	Other function	Structural maintenance of chromosomes protein	OG0007784	51.8124	56.8638	53.968	6.79183	7.80365	6.65909	-3.02018	5e-16
Lacaka1|1945967	Lacaka1	1945967	gene_6205	Repressed during mycorrhization	X	NA	NA	NA	NA	NA	NA	NA	NA	NA	PF03936	Terpene_synth_C	NA	Other function	Terpene synthase	OG0003761	231.184	236.161	256.818	15.8187	25.9528	16.4381	-3.78089	9.98e-22
Lacaka1|1949133	Lacaka1	1949133	gene_9317	Repressed during mycorrhization	X	NA	NA	NA	NA	NA	NA	NA	NA	NA	PF07690,PF00083	MFS_1,Sugar_tr	General function prediction only	Transporter/Permease	Sugar transporter	OG0001211	139.315	124.081	103.503	15.6637	15.7454	12.392	-3.20029	1.78e-14
Lacaka1|1949760	Lacaka1	1949760	gene_9289	Repressed during mycorrhization	X	NA	NA	NA	NA	NA	NA	NA	NA	NA	NA	NA	NA	Unknown	Unknown	OG0002014	454.441	494.66	456.707	74.7387	58.2792	67.4293	-3.49264	1.02e-37
Lacaka1|1950950	Lacaka1	1950950	gene_9627	Repressed during mycorrhization	X	Secreted	NA	NA	NA	NA	S53	cannonical region	3.4.14.9	Tripeptidyl-peptidase I.	PF09286	Pro-kuma_activ	NA	Protease	Sedolisin (S53)	OG0007922	65.2594	55.7879	45.1147	4.68315	5.09228	7.6149	-3.29594	2.17e-10
Lacaka1|1964465	Lacaka1	1964465	gene_425	Repressed during mycorrhization	X	NA	NA	NA	NA	NA	NA	NA	3.4.24.56	Insulysin.	PF16187,PF00675,PF05193	Peptidase_M16_M,Peptidase_M16,Peptidase_M16_C	Posttranslational modification, protein turnover, chaperones	Protease	Pitrilysin (M16)	OG0007999	299.118	306.189	412.532	59.7863	51.8524	51.6627	-3.02709	3.45e-10
Lacaka1|1969905	Lacaka1	1969905	gene_11502	Repressed during mycorrhization	X	Secreted	NA	AA1_1	Phenols	NA	NA	NA	1.10.3.3	L-ascorbate oxidase.	PF00394,PF07731,PF07732	Cu-oxidase,Cu-oxidase_2,Cu-oxidase_3	Secondary metabolites biosynthesis, transport and catabolism	CAZyme	Laccase	OG0008019	44.147	41.8127	42.8882	5.55063	5.46429	7.64391	-3.45932	1.42e-19
Lacaka1|1975709	Lacaka1	1975709	gene_3744	Repressed during mycorrhization	X	NA	NA	NA	NA	NA	NA	NA	NA	NA	PF00067	p450	Secondary metabolites biosynthesis, transport and catabolism	Cytochrome p450		OG0000551	206.535	197.806	214.036	11.6416	10.6682	11.7086	-4.48923	2.19e-122
Lacaka1|2029574	Lacaka1	2029574	gene_11344	Repressed during mycorrhization	X	NA	NA	NA	NA	NA	NA	NA	NA	NA	PF07690,PF00083,PF06609	MFS_1,Sugar_tr,TRI12	General function prediction only	Transporter/Permease	Sugar transporter	OG0008152	50.4346	53.8696	55.0311	9.63211	6.65743	6.54669	-3.23757	1.9e-13
Lacaka1|2052809	Lacaka1	2052809	gene_5026	Repressed during mycorrhization	X	NA	NA	NA	NA	NA	NA	NA	NA	NA	PF01154,PF08540	HMG_CoA_synt_N,HMG_CoA_synt_C	Lipid transport and metabolism	Other function	Hydroxymethylglutaryl-coenzyme A synthase	OG0001908	139.488	176.617	156.258	33.4346	35.7103	32.4069	-2.494	0.00311679
Lacaka1|2053304	Lacaka1	2053304	gene_4913	Repressed during mycorrhization	X	NA	NA	NA	NA	NA	NA	NA	1.1.1.1	Alcohol dehydrogenase.	PF00465,PF13685	Fe-ADH,Fe-ADH_2	Energy production and conversion	Other function	Alcohol dehydrogenase.	OG0008250	237.932	223.7	206.036	42.118	28.1423	31.1093	-3.00512	1.12e-11
Lacaka1|2056297	Lacaka1	2056297	gene_13438	Repressed during mycorrhization	X	NA	NA	NA	NA	NA	NA	NA	NA	NA	PF12171,PF13894,PF12874,PF00096	zf-C2H2_jaz,zf-C2H2_4,zf-met,zf-C2H2	General function prediction only	Transcription factor	Unknown	OG0000310	62.2612	63.1896	60.5076	12.8841	11.4723	11.1955	-2.56642	0.00443846
Lacaka1|2065288	Lacaka1	2065288	gene_6390	Repressed during mycorrhization	X	NA	NA	NA	NA	NA	NA	NA	4.2.1.11	Phosphopyruvate hydratase.	PF00113,PF03952,PF13378	Enolase_C,Enolase_N,MR_MLE_C	Carbohydrate transport and metabolism	Other function	Phosphopyruvate hydratase	OG0008321	5460.16	6380.58	6403.37	1438.11	1064.83	1109.68	-2.48796	0.00544024
Lacaka1|2083812	Lacaka1	2083812	gene_2855	Repressed during mycorrhization	X	NA	NA	NA	NA	NA	NA	NA	NA	NA	PF00651	BTB	NA	Transcription factor	Holds a BTB domain	OG0004040	98.863	89.5141	93.7044	20.1352	17.1878	19.1684	-2.64032	9.69e-05
Lacaka1|2084038	Lacaka1	2084038	gene_4425	Repressed during mycorrhization	X	NA	NA	NA	NA	NA	NA	NA	NA	NA	PF07992,PF00070	Pyr_redox_2,Pyr_redox	Energy production and conversion	Other function	oxidoreductase	OG0004041	105.736	118.105	113.407	7.09014	6.9166	7.65144	-2.37779	0.0271711
Lacaka1|2094275	Lacaka1	2094275	gene_10323	Repressed during mycorrhization	X	NA	NA	NA	NA	NA	NA	NA	NA	NA	PF00083,PF07690	Sugar_tr,MFS_1	Inorganic ion transport and metabolism	Transporter/Permease	Sugar transporter	OG0008453	555.312	710.338	658.068	160.429	156.149	122.736	-2.37199	0.0183125
Lacaka1|982354	Lacaka1	982354	gene_5197	Repressed during mycorrhization	X	NA	NA	NA	NA	NA	NA	NA	NA	NA	PF00324,PF13520	AA_permease,AA_permease_2	Amino acid transport and metabolism	Transporter/Permease	Amino acid permease	OG0001580	4.71626	12.0939	0	2.64885	2.04192	2.053	-3.73216	1.42e-11
Lacaka1|1788002	Lacaka1	1788002	gene_734	Repressed during mycorrhization	XI	NA	NA	NA	NA	NA	NA	NA	NA	NA	PF00291	PALP	Amino acid transport and metabolism	Other function	Holds a PALP domain	OG0001524	48.731	51.8955	55.3793	14.3204	14.4439	15.7698	-3.41081	4.58e-14
Lacaka1|1795620	Lacaka1	1795620	gene_3578	Repressed during mycorrhization	XI	NA	NA	NA	NA	NA	NA	NA	NA	NA	PF06172	Cupin_5	NA	Other function	Cupin	OG0005436	319.791	252.731	243.609	13.6801	14.9207	12.3374	-4.19033	7.37e-40
Lacaka1|1816341	Lacaka1	1816341	gene_7137	Repressed during mycorrhization	XI	SSP	NA	EXPN	NA	NA	NA	NA	NA	NA	PF07249	Cerato-platanin	NA	CAZyme	Distantly related to plant expansins	OG0002944	1134.74	960.192	791.825	13.0514	12.8757	7.15017	-6.13954	3.32e-64
Lacaka1|1879609	Lacaka1	1879609	gene_7198	Repressed during mycorrhization	XI	NA	NA	NA	NA	NA	NA	NA	4.2.1.69	Cyanamide hydratase.	PF01966	HD	NA	Other function	Cyanamide hydratase	OG0003418	4149.1	3352.5	3296.73	523.612	340.162	376.875	-3.3191	6.41e-12
Lacaka1|615995	Lacaka1	615995	gene_3832	Repressed during mycorrhization	XI	NA	NA	NA	NA	NA	NA	NA	NA	NA	NA	NA	NA	Unknown	Unknown	OG0002209	60.6449	43.1205	38.0555	19.7453	17.4894	14.8826	-3.34109	6.95e-09
Lacaka1|666138	Lacaka1	666138	gene_7136	Repressed during mycorrhization	XI	SSP	NA	EXPN	NA	NA	NA	NA	NA	NA	PF07249	Cerato-platanin	NA	CAZyme	Distantly related to plant expansins	OG0000403	504.062	459.73	651.546	9.54536	9.23207	9.0793	-5.9701	1.8e-79
Lacaka1|899343	Lacaka1	899343	gene_7419	Repressed during mycorrhization	XI	NA	NA	NA	NA	NA	NA	NA	2.5.1.18	Glutathione transferase.	PF00043,PF02798,PF14497,PF13410,PF13417,PF13409	GST_C,GST_N,GST_C_3,GST_C_2,GST_N_3,GST_N_2	Posttranslational modification, protein turnover, chaperones	Other function	Glutathione transferase	OG0004305	3.19576	4.9198	2.33107	1.32846	1.05309	0.820325	-2.93019	6.12e-05

## Sheet: Sheet S4B-L.deliciosus
Gene ID (this study)	JGI species ID	JGI protein ID	JGI gene ID	Gene regulation (genes are considered as differentially expressed if LFC > 2 or <-2 and p.value adjusted < 0.05)	Gene regulation_stage	Cluster ID in Figure 2B	Cluster ID in Figure 5	Secretion	Lipase	CAZyme family	CAZyme_substrate. PCW: Plant cell wall degrading enzyme.	Lectin	Subtilase family	Subtilase conservation. Subtilase missing one of their three catalytic regions were labelled as partial. If at least one of the catalytic region lack a perfect match to the pattern described in the litterature, the subtilase was labelled as containing a non-canonical region.	Enzyme Commission number	Enzyme Commission number description	PFAM domain ID	PFAM domain short description	KOG annotation	Highlighted functions	Highlighted functions additionnal details	Orthogroup ID	expression (TPM) in sample Ld48_2w_ct1 (FLM)	expression (TPM) in sample Ld48_2w_ct2 (FLM)	expression (TPM) in sample Ld48_2w_ct3 (FLM)	expression (TPM) in sample co48pt_2w1 (mycorrhiza - 2wpi)	expression (TPM) in sample co48pt_2w2 (mycorrhiza - 2wpi)	expression (TPM) in sample co48pt_2w3 (mycorrhiza - 2wpi)	expression (TPM) in sample myc48pt_4w1 (mycorrhiza - 4wpi)	expression (TPM) in sample myc48pt_4w2 (mycorrhiza - 4wpi)	expression (TPM) in sample myc48pt_4w3 (mycorrhiza - 4wpi)	expression (TPM) in sample myc48pt_6w1 (mycorrhiza - 6wpi)	expression (TPM) in sample myc48pt_6w2 (mycorrhiza - 6wpi)	expression (TPM) in sample myc48pt_6w3 (mycorrhiza - 6wpi)	log2FoldChange (LFC) between FLM and 2wpi	adjusted p.value associated to the DE analysis between FLM and 2wpi	log2FoldChange (LFC) between FLM and 4wpi	adjusted p.value associated to the DE analysis between FLM and 4wpi	log2FoldChange (LFC) between FLM and 6wpi	adjusted p.value associated to the DE analysis between FLM and 6wpi
Lacdel1|1004619	Lacdel1	1004619	gene_3279	Repressed during mycorrhization	6 wpi only	D	XI	SSP	NA	EXPN	NA	NA	NA	NA	NA	NA	PF03330	DPBB_1	NA	CAZyme	Distantly related to plant expansins	OG0000927	29.2122	20.8159	32.2488	4.90845	7.7337	7.65435	3.59442	3.16843	1.56767	2.37239	2.71206	1.50148	-1.90238	1	-2.86067	0.225035	-3.24011	0.0116835
Lacdel1|1060664	Lacdel1	1060664	gene_8614	Repressed during mycorrhization	4 and 6 wpi	D	XI	SSP	NA	EXPN	NA	NA	NA	NA	NA	NA	PF07249	Cerato-platanin	NA	CAZyme	Distantly related to plant expansins	OG0001120	262.289	156.534	145.434	13.2914	4.23718	7.16073	0.25443	0.413514	0.57072	2.76273	1.15827	0.760554	-4.53786	8.21e-08	-8.50566	3.93e-19	-6.57613	8.26e-21
Lacdel1|1185978	Lacdel1	1185978	gene_8550	Repressed during mycorrhization	4 wpi only	G	XI	NA	NA	NA	NA	NA	NA	NA	NA	NA	NA	NA	NA	Unknown	Unknown	OG0003310	1962.67	1546.63	1305.19	853.708	947.157	783.448	164.894	144.706	170.121	218.381	273.306	170.342	-0.771858	1	-2.91609	9.51e-05	-2.46722	0.402959
Lacdel1|1274763	Lacdel1	1274763	gene_2526	Repressed during mycorrhization	4 wpi only	A	XI	NA	NA	NA	NA	NA	NA	NA	NA	NA	NA	NA	NA	Unknown	Unknown	OG0007994	319.157	275.38	260.646	60.7427	61.935	63.8626	18.8314	20.8437	22.8479	48.7354	43.8747	42.7159	-2.07088	1	-3.33479	8.03e-25	-2.22979	1
Lacdel1|1275069	Lacdel1	1275069	gene_2528	Repressed during mycorrhization	4 and 6 wpi	A	XI	SSP	NA	NA	NA	NA	NA	NA	NA	NA	PF07510	DUF1524	NA	Unknown	Unknown	OG0008673	144.063	201.538	151.493	133.829	206.394	178.409	13.6653	13.1247	14.1988	7.37784	7.45717	13.1574	0.112174	1	-3.17095	1.37e-07	-3.70149	9.21e-15
Lacdel1|1308634	Lacdel1	1308634	gene_9616	Repressed during mycorrhization	4 wpi only	D	XI	NA	NA	NA	NA	NA	NA	NA	NA	NA	NA	NA	NA	Unknown	Unknown	OG0004366	29.958	25.5476	27.8315	5.01954	5.70214	4.15414	1.04353	2.57018	1.55834	4.21448	2.98292	3.09994	-2.34578	1	-3.63175	5.39e-07	-2.68754	0.142738
Lacdel1|1329173	Lacdel1	1329173	gene_10396	Repressed during mycorrhization	4 wpi only	E	XI	NA	NA	NA	NA	NA	NA	NA	NA	NA	NA	NA	NA	Unknown	Unknown	OG0004178	7.05203	9.1568	9.79716	3.95466	5.09805	3.50196	0.667296	0.838	0.429294	1.4873	1.21634	0.515287	-0.900622	1	-3.70665	0.00751517	-2.6756	1
Lacdel1|1449350	Lacdel1	1449350	gene_11169	Repressed during mycorrhization	4 and 6 wpi	A	XI	Secreted	NA	NA	NA	NA	NA	NA	NA	NA	PF00067	p450	Secondary metabolites biosynthesis, transport and catabolism	Cytochrome p450		OG0010365	179.937	167.308	125.38	77.1473	75.3588	95.8231	11.3583	11.6968	16.4596	18.0744	19.4856	16.5433	-0.771307	1	-3.19784	8.08e-09	-2.77137	0.00112199
Lacdel1|1515643	Lacdel1	1515643	gene_3604	Repressed during mycorrhization	4 wpi only	D	XI	NA	NA	NA	NA	NA	NA	NA	NA	NA	NA	NA	NA	Unknown	Unknown	OG0001015	43.3764	40.6055	38.7947	19.8438	20.3216	18.9255	4.59754	5.11662	6.22642	8.30293	9.27773	8.81504	-0.871156	1	-2.4863	0.00141641	-1.79431	1
Lacdel1|1516441	Lacdel1	1516441	gene_3610	Repressed during mycorrhization	4 and 6 wpi	A	XI	NA	NA	NA	NA	NA	NA	NA	NA	NA	PF16908	VPS13	NA	Other function	Vacuolar sorting-associated protein	OG0004653	72.5947	78.6265	76.5982	63.0395	60.681	58.2665	6.98503	6.55223	4.70581	8.91616	8.8731	6.96155	-0.245769	1	-3.38652	2.84e-18	-2.87977	1.08e-07
Lacdel1|1549452	Lacdel1	1549452	gene_12897	Repressed during mycorrhization	2 wpi only	E	XI	NA	NA	NA	NA	NA	NA	NA	NA	NA	NA	NA	NA	Unknown	Unknown	OG0000524	14.6742	14.2468	13.314	0.911323	1.0863	0.901319	1.60216	0.850541	2.87997	3.67626	2.47917	2.35018	-3.63245	0.00204381	-2.67272	0.431431	-1.79517	1
Lacdel1|1585762	Lacdel1	1585762	gene_11634	Repressed during mycorrhization	4 and 6 wpi	D	XI	NA	NA	NA	NA	NA	NA	NA	NA	NA	PF12937	F-box-like	NA	Other function	Holds a F-box domain	OG0002794	22.7861	26.6252	25.0059	44.6077	44.8611	43.4331	0.671606	1.5004	1.49902	1.19876	1.61772	1.82423	1.00079	1	-3.80033	5.56e-09	-3.53373	1.75e-07
Lacdel1|1643993	Lacdel1	1643993	gene_12433	Repressed during mycorrhization	4 wpi only	A	XI	NA	NA	NA	NA	NA	NA	NA	NA	NA	NA	NA	NA	Unknown	Unknown	OG0007979	178.185	209.669	196.965	182.449	177.047	198.861	32.9403	37.0968	29.8236	39.8652	46.4627	43.0353	-0.124822	1	-2.38746	0.040213	-1.9264	1
Lacdel1|1685006	Lacdel1	1685006	gene_1862	Repressed during mycorrhization	4 and 6 wpi	A	XI	NA	NA	NA	NA	NA	NA	NA	NA	NA	NA	NA	NA	Unknown	Unknown	OG0007633	714.501	734.725	693.56	507.78	490.664	494.991	31.6237	23.8398	22.2908	50.7908	40.9199	32.1733	-0.373508	1	-4.33944	1.19e-32	-3.69559	3.02e-17
Lacdel1|1719972	Lacdel1	1719972	gene_14335	Repressed during mycorrhization	4 and 6 wpi	A	XI	NA	NA	NA	NA	NA	NA	NA	NA	NA	PF07690,PF00083,PF12832	MFS_1,Sugar_tr,MFS_1_like	General function prediction only	Transporter/Permease	Sugar transporter	OG0002528	64.2328	57.9494	55.0704	59.1613	65.7201	77.1057	6.07052	7.08701	5.91571	6.94712	6.25781	5.8036	0.305724	1	-2.81148	1.32e-05	-2.82049	1.08e-05
Lacdel1|1726389	Lacdel1	1726389	gene_14544	Repressed during mycorrhization	4 and 6 wpi	A	XI	NA	NA	NA	NA	NA	NA	NA	NA	NA	PF04749	PLAC8	NA	Other function	PLAC8	OG0000497	443.105	377.048	405.881	162.087	143.072	136.098	4.52762	5.8568	7.92479	22.9297	28.2453	19.1942	-1.29964	1	-5.11459	2.72e-26	-3.40122	2.43e-08
Lacdel1|1731550	Lacdel1	1731550	gene_14600	Repressed during mycorrhization	4 and 6 wpi	D	XI	NA	NA	NA	NA	NA	NA	NA	NA	NA	NA	NA	NA	Unknown	Unknown	OG0000580	71.3973	65.2179	86.9788	32.7038	23.5748	45.3401	0.553237	0.25393	0.149719	0.341296	1.19355	0.848095	-1.02232	1	-6.89105	1.85e-23	-6.14458	9.39e-23
Lacdel1|1748284	Lacdel1	1748284	gene_12728	Repressed during mycorrhization	4 wpi only	D	XI	NA	NA	NA	NA	NA	NA	NA	NA	NA	NA	NA	NA	Unknown	Unknown	OG0001459	14.1055	12.9197	12.6133	10.6624	10.7837	12.3714	1.60276	1.6139	1.65665	2.3191	2.45284	2.53076	-0.200184	1	-2.71316	0.0333707	-2.06228	1
Lacdel1|1753628	Lacdel1	1753628	gene_12791	Repressed during mycorrhization	4 and 6 wpi	A	XI	NA	NA	NA	NA	NA	NA	NA	NA	NA	PF12223	DUF3602	NA	Unknown	Unknown	OG0004058	478.381	563.799	378.297	315.963	414.349	344.849	23.2195	19.3025	16.5761	23.756	27.5781	17.6499	-0.308751	1	-4.22096	3.58e-26	-4.04604	2.26e-22
Lacdel1|1784454	Lacdel1	1784454	gene_11838	Repressed during mycorrhization	4 and 6 wpi	D	XI	SSP	NA	EXPN	NA	NA	NA	NA	NA	NA	PF07249	Cerato-platanin	NA	CAZyme	Distantly related to plant expansins	OG0001120	110.922	74.7718	74.7869	9.62637	2.68866	4.10844	0.618343	0.686185	0.949721	1.03838	1.22634	1.23981	-3.80544	0.00153405	-6.24483	9.87e-16	-5.59614	3.17e-14
Lacdel1|1845645	Lacdel1	1845645	gene_16132	Repressed during mycorrhization	4 and 6 wpi	A	XI	NA	NA	NA	NA	NA	NA	NA	NA	NA	PF07690,PF00083,PF12832	MFS_1,Sugar_tr,MFS_1_like	General function prediction only	Transporter/Permease	Sugar transporter	OG0002528	78.9223	62.0639	64.0079	73.2511	80.5222	90.5181	5.08452	5.78924	5.8907	5.89447	6.59623	5.54131	0.36066	1	-3.21293	5.61e-12	-3.09685	5.61e-10
Lacdel1|2212789	Lacdel1	2212789	gene_1364	Repressed during mycorrhization	6 wpi only	A	XI	Secreted	NA	GH23	Peptidoglycan	NA	NA	NA	NA	NA	PF01464	SLT	NA	CAZyme	Glycoside Hydrolase	OG0001107	163.177	146.831	211.738	72.3118	68.3048	86.9436	77.1784	55.173	52.7454	18.9435	11.2543	13.7082	-1.06739	1	-1.06068	1	-3.14813	0.000273399
Lacdel1|2213740	Lacdel1	2213740	gene_133	Repressed during mycorrhization	6 wpi only	A	XI	NA	NA	NA	NA	NA	NA	NA	NA	NA	PF00096	zf-C2H2	General function prediction only	Transcription factor	Holds a zinc finger domain	OG0008805	165.143	117.114	134.838	20.1706	35.0856	35.6887	15.1504	17.2889	22.1145	16.7301	13.2772	19.4301	-2.11916	1	-2.4455	1	-2.7456	0.0485632
Lacdel1|2216591	Lacdel1	2216591	gene_3393	Repressed during mycorrhization	4 and 6 wpi	A	XI	NA	NA	NA	NA	NA	NA	NA	NA	NA	PF12223	DUF3602	NA	Unknown	Unknown	OG0004058	718.395	830.214	546.983	449.798	587.705	511.926	32.0073	27.4041	16.3197	36.7277	42.224	31.0254	-0.339045	1	-4.3972	3.23e-23	-3.87891	1.39e-14
Lacdel1|2222285	Lacdel1	2222285	gene_8273	Repressed during mycorrhization	4 and 6 wpi	D	XI	Secreted	NA	NA	NA	NA	S53	cannonical region	3.4.14.9	Tripeptidyl-peptidase I.	PF09286,PF00082	Pro-kuma_activ,Peptidase_S8	NA	Protease	Sedolisin (S53)	OG0001650	59.5269	39.4102	49.6287	19.6574	37.5631	28.5361	1.33132	2.12006	1.37255	2.69296	4.34985	2.35091	-0.69489	1	-4.49143	3.1e-14	-3.69898	1.8e-07
Lacdel1|2234246	Lacdel1	2234246	gene_16754	Repressed during mycorrhization	4 wpi only	D	XI	NA	NA	NA	NA	NA	NA	NA	NA	NA	NA	NA	NA	Unknown	Unknown	OG0012216	53.6668	54.3809	46.4094	33.6203	29.1556	30.0375	4.76374	5.65057	4.18055	9.46932	5.90954	6.31502	-0.591842	1	-2.99538	7.93e-05	-2.44649	0.51634
Lacdel1|2236280	Lacdel1	2236280	gene_24385	Repressed during mycorrhization	4 wpi only	D	XI	NA	NA	NA	NA	NA	NA	NA	NA	NA	PF13087,PF13086,PF13245,PF13604	AAA_12,AAA_11,AAA_19,AAA_30	Replication, recombination and repair	Other function	ATPases Associated with diverse cellular Activities	OG0000494	23.4649	26.7975	24.8403	10.0568	9.26296	7.83924	2.00984	2.09614	2.75335	4.90743	10.3972	6.31446	-1.36149	1	-3.09773	0.000510354	-1.41839	1
Lacdel1|2236525	Lacdel1	2236525	gene_16944	Repressed during mycorrhization	4 wpi only	D	XI	NA	NA	NA	NA	NA	NA	NA	NA	NA	PF04749	PLAC8	NA	Other function	PLAC8	OG0000853	22.2565	22.7898	22.4311	21.9735	15.4448	20.2987	2.12583	0.659572	2.23758	4.09973	2.50582	2.29114	-0.144265	1	-3.40551	0.00513067	-2.66941	0.796952
Lacdel1|2236533	Lacdel1	2236533	gene_16952	Repressed during mycorrhization	4 and 6 wpi	A	XI	NA	NA	NA	NA	NA	NA	NA	NA	NA	PF04749	PLAC8	NA	Other function	PLAC8	OG0000497	694.093	605.199	649.049	253.445	229.661	228.371	9.84454	7.24325	9.04406	31.5239	43.8351	26.7903	-1.31006	1	-5.7894	1.15e-48	-3.76786	6.87e-16
Lacdel1|2236545	Lacdel1	2236545	gene_16945	Repressed during mycorrhization	4 wpi only	A	XI	NA	NA	NA	NA	NA	NA	NA	NA	NA	PF04749	PLAC8	NA	Other function	PLAC8	OG0000853	930.833	1205.39	1180.63	751.661	188.583	308.138	34.6936	37.5324	34.3677	219.164	337.621	147.67	-1.28435	1	-4.85642	1.28e-06	-1.90546	1
Lacdel1|2291941	Lacdel1	2291941	gene_7468	Repressed during mycorrhization	4 and 6 wpi	D	XI	NA	NA	NA	NA	NA	NA	NA	NA	NA	NA	NA	NA	Unknown	Unknown	OG0007607	35.9282	27.9676	34.4973	23.0053	18.2057	22.9863	2.16222	1.10396	1.5413	2.3661	1.76733	2.63354	-0.532016	1	-4.30105	1.36e-07	-3.66465	2.26e-05
Lacdel1|2298642	Lacdel1	2298642	gene_14698	Repressed during mycorrhization	4 and 6 wpi	A	XI	NA	NA	NA	NA	NA	NA	NA	NA	NA	PF01565	FAD_binding_4	Energy production and conversion	Other function	Holds a FAD binding domain	OG0000704	766.921	744.558	702.867	952.378	805.762	819.545	33.1458	50.2186	27.7681	86.6883	29.2218	32.7384	0.322772	1	-3.96383	7.86e-07	-3.51758	0.000513862
Lacdel1|2310160	Lacdel1	2310160	gene_435	Repressed during mycorrhization	4 and 6 wpi	D	XI	NA	NA	NA	NA	NA	NA	NA	NA	NA	PF04182	B-block_TFIIIC	NA	Other function	Putative transcription factor	OG0008548	71.9534	77.9953	72.5117	30.8759	31.3956	22.4337	3.71019	6.69942	4.44202	8.25834	6.39319	4.05332	-1.23658	1	-3.41967	1.46e-07	-3.11217	0.000116704
Lacdel1|2319502	Lacdel1	2319502	gene_13840	Repressed during mycorrhization	4 and 6 wpi	A	XI	NA	NA	NA	NA	NA	NA	NA	2.5.1.18	Glutathione transferase.	PF13417,PF13410	GST_N_3,GST_C_2	Posttranslational modification, protein turnover, chaperones	Other function	Glutathione transferase	OG0003763	161.32	196.87	188.786	288.596	309.559	250.082	9.54742	10.2445	12.1502	17.7731	24.9819	17.6319	0.746508	1	-3.65687	8.15e-17	-2.72585	0.00111223
Lacdel1|2320857	Lacdel1	2320857	gene_14694	Repressed during mycorrhization	4 wpi only	A	XI	NA	NA	NA	NA	NA	NA	NA	NA	NA	PF01565	FAD_binding_4	Energy production and conversion	Other function	Holds a FAD binding domain	OG0000704	148.017	155.823	192.279	215.239	143.051	255.556	6.56783	14.59	8.08328	44.6409	13.7222	21.8285	0.461547	1	-3.67269	0.000338951	-2.19146	1
Lacdel1|2321250	Lacdel1	2321250	gene_15458	Repressed during mycorrhization	4 wpi only	D	XI	NA	NA	NA	NA	NA	NA	NA	3.1.1.23	Acylglycerol lipase.	PF12697,PF00561	Abhydrolase_6,Abhydrolase_1	General function prediction only	Other function	Abhydrolase	OG0001795	23.8363	21.7242	18.3538	14.7204	18.6131	15.7677	1.76762	2.10963	1.33413	3.50704	4.38615	1.81668	-0.255851	1	-3.1837	0.00125762	-2.34543	1
Lacdel1|2357285	Lacdel1	2357285	gene_5973	Repressed during mycorrhization	6 wpi only	D	XI	NA	NA	NA	NA	NA	NA	NA	3.4.23.5	Cathepsin D.	PF00026	Asp	Posttranslational modification, protein turnover, chaperones	Protease	Pepsin (A1)	OG0007132	46.1268	44.6632	52.8824	35.3196	36.4393	39.1414	8.32552	5.9855	5.45414	3.86662	4.36286	3.78708	-0.21434	1	-2.40302	0.477304	-3.15728	6.54e-08
Lacdel1|2371233	Lacdel1	2371233	gene_6867	Repressed during mycorrhization	6 wpi only	E	XI	NA	NA	NA	NA	NA	NA	NA	NA	NA	NA	NA	NA	Unknown	Unknown	OG0004478	6.3884	6.93287	6.06956	6.25434	4.68558	7.42162	2.12203	2.65838	2.82629	0.407308	0	0.229398	0.10467	1	-1.14396	1	-4.78912	0.0493604
Lacdel1|2389068	Lacdel1	2389068	gene_9396	Repressed during mycorrhization	4 wpi only	A	XI	NA	NA	NA	NA	NA	NA	NA	NA	NA	PF00067	p450	Secondary metabolites biosynthesis, transport and catabolism	Cytochrome p450		OG0006295	109.259	120.229	120.459	105.183	53.7355	66.5441	5.03383	4.58782	3.90303	9.94171	26.0469	9.4522	-0.50089	1	-4.30937	6.54e-09	-2.59343	1
Lacdel1|2398044	Lacdel1	2398044	gene_10305	Repressed during mycorrhization	4 and 6 wpi	D	XI	Secreted	NA	NA	NA	NA	NA	NA	NA	NA	PF01822	WSC	Carbohydrate transport and metabolism ; Posttranslational modification, protein turnover, chaperones	Other function	Holds a WSC domain	OG0003437	36.792	27.4472	34.2824	22.9134	20.125	19.2682	1.05203	0.8251	1.83991	1.02214	1.55556	1.80483	-0.519395	1	-4.2886	1.76e-12	-4.12257	1.78e-11
Lacdel1|2412090	Lacdel1	2412090	gene_14548	Repressed during mycorrhization	4 and 6 wpi	A	XI	NA	NA	NA	NA	NA	NA	NA	NA	NA	PF04749	PLAC8	NA	Other function	PLAC8	OG0002359	146.262	101.283	118.748	68.8183	76.5971	79.3697	2.80566	2.14821	1.82802	2.33614	3.59087	2.32508	-0.526288	1	-5.15463	8.88e-22	-4.9733	4.08e-21
Lacdel1|2461867	Lacdel1	2461867	gene_16947	Repressed during mycorrhization	4 and 6 wpi	D	XI	NA	NA	NA	NA	NA	NA	NA	NA	NA	PF04749	PLAC8	NA	Other function	PLAC8	OG0002359	109.043	85.3649	80.613	38.5511	34.4317	27.8569	2.34764	2.01986	1.29855	2.95943	3.34031	1.2723	-1.3337	1	-4.87832	1.16e-16	-4.71673	4.91e-16
Lacdel1|2502475	Lacdel1	2502475	gene_1035	Repressed during mycorrhization	6 wpi only	A	XI	NA	NA	NA	NA	NA	NA	NA	NA	NA	PF01231	IDO	NA	Other function	Indoleamine-pyrrole 2,3-dioxygenase	OG0015862	210.433	248.52	223.023	163.694	202.481	163.688	64.3875	47.9412	38.6883	28.4893	28.1241	18.6111	-0.255961	1	-1.74344	1	-2.79477	0.00442045
Lacdel1|2506969	Lacdel1	2506969	gene_8444	Repressed during mycorrhization	4 wpi only	D	XI	NA	NA	GH18	Chitin	3c2__4B15 chi-lectin (TCLL)	NA	NA	3.2.1.14	Chitinase.	PF00704	Glyco_hydro_18	Cell wall/membrane/envelope biogenesis	CAZyme	Glycoside Hydrolase	OG0007960	35.8811	39.7493	30.7228	27.9941	15.1705	27.9574	4.65466	3.75155	2.46387	6.01513	5.90583	3.82331	-0.555477	1	-3.01524	0.0222572	-2.45277	1
Lacdel1|2514264	Lacdel1	2514264	gene_3345	Repressed during mycorrhization	4 wpi only	D	XI	NA	NA	NA	NA	NA	NA	NA	NA	NA	NA	NA	NA	Unknown	Unknown	OG0001459	22.808	24.954	24.2194	27.8567	24.2913	29.454	1.93117	2.25978	2.26491	3.5543	2.10973	2.14349	0.320155	1	-2.87711	0.00170923	-2.62656	0.0784022
Lacdel1|2515416	Lacdel1	2515416	gene_5449	Repressed during mycorrhization	4 wpi only	A	XI	NA	NA	NA	NA	NA	NA	NA	NA	NA	NA	NA	NA	Unknown	Unknown	OG0006720	182.922	204.23	213.897	301.131	261.29	285.823	27.7191	26.4187	25.0501	37.6585	27.125	24.6883	0.544072	1	-2.64482	0.00920143	-2.39428	0.586766
Lacdel1|2516779	Lacdel1	2516779	gene_4074	Repressed during mycorrhization	4 wpi only	A	XI	NA	NA	NA	NA	NA	NA	NA	NA	NA	NA	NA	NA	Unknown	Unknown	OG0007727	111.453	116.93	102.935	87.4602	90.4704	65.8209	13.3486	11.8932	9.55721	24.61	19.6653	21.4665	-0.294334	1	-2.75949	0.00130438	-1.87551	1
Lacdel1|2518222	Lacdel1	2518222	gene_6903	Repressed during mycorrhization	6 wpi only	D	XI	NA	NA	NA	NA	NA	NA	NA	NA	NA	NA	NA	NA	Unknown	Unknown	OG0000282	26.0639	27.3144	25.2011	23.6963	33.4439	26.4284	4.65583	8.09115	5.41217	1.63324	0.651015	0.932778	0.254734	1	-1.69198	1	-4.53887	4.48e-14
Lacdel1|2522957	Lacdel1	2522957	gene_11588	Repressed during mycorrhization	4 and 6 wpi	A	XI	NA	NA	NA	NA	NA	NA	NA	NA	NA	NA	NA	NA	Unknown	Unknown	OG0009104	949.359	953.618	993.129	299.412	236.105	263.802	44.1498	28.9426	27.5989	93.7937	80.6009	55.1887	-1.68955	1	-4.3425	2.21e-21	-3.20246	1.07e-05
Lacdel1|2524260	Lacdel1	2524260	gene_12442	Repressed during mycorrhization	4 wpi only	A	XI	NA	NA	NA	NA	NA	NA	NA	NA	NA	NA	NA	NA	Unknown	Unknown	OG0000757	144.973	156.355	123.52	80.1873	100.543	86.2684	19.6827	16.923	16.4853	26.0691	26.0806	25.4102	-0.538761	1	-2.66249	0.000150487	-2.0516	1
Lacdel1|2525036	Lacdel1	2525036	gene_11197	Repressed during mycorrhization	4 wpi only	D	XI	NA	NA	NA	NA	NA	NA	NA	NA	NA	NA	NA	NA	Unknown	Unknown	OG0000022	20.8916	22.7482	22.9103	8.96058	10.139	11.6065	2.2046	3.07927	2.49586	4.37314	4.70967	5.49949	-0.893173	1	-2.64591	0.0256091	-1.81632	1
Lacdel1|2525452	Lacdel1	2525452	gene_12282	Repressed during mycorrhization	4 wpi only	E	XI	NA	NA	NA	NA	NA	NA	NA	4.1.1.65	Phosphatidylserine decarboxylase.	PF00168	C2	Lipid transport and metabolism	Other function	Holds a C2 domain	OG0003762	8.78228	9.7674	8.45874	3.8447	3.69662	3.39121	0.696052	0.596797	0.985074	2.10076	3.18994	2.74712	-1.1643	1	-2.93283	0.0159947	-1.44361	1
Lacdel1|2528347	Lacdel1	2528347	gene_14689	Repressed during mycorrhization	4 wpi only	D	XI	NA	NA	NA	NA	NA	NA	NA	NA	NA	PF04389	Peptidase_M28	General function prediction only ; Posttranslational modification, protein turnover, chaperones	Protease	Aminopeptidase related (M28)	OG0012094	30.4138	24.3	38.5484	15.6112	20.3569	12.4044	2.17784	2.04935	1.81019	3.99243	4.70959	3.43652	-0.841871	1	-3.57629	2.25e-08	-2.56255	0.438241
Lacdel1|2533743	Lacdel1	2533743	gene_22436	Repressed during mycorrhization	4 and 6 wpi	E	XI	NA	NA	NA	NA	NA	NA	NA	NA	NA	PF00069,PF07714	Pkinase,Pkinase_Tyr	Signal transduction mechanisms	Other function	Tyrosine kinase	OG0012757	9.8752	11.6162	9.1273	4.00659	4.6728	3.9103	1.0821	1.18707	1.43181	0.924419	0.986486	0.95283	-1.11092	1	-2.8909	0.0335067	-3.15944	0.00247371
Lacdel1|2547927	Lacdel1	2547927	gene_896	Repressed during mycorrhization	4 and 6 wpi	A	XI	NA	NA	NA	NA	NA	NA	NA	NA	NA	NA	NA	NA	Unknown	Unknown	OG0002209	804.088	803.186	754.351	1257.85	1240.38	1079.18	18.3252	23.0353	16.4777	19.7116	9.82173	2.77362	0.74555	1	-4.85225	4.1e-07	-5.7178	7.94e-12
Lacdel1|2553802	Lacdel1	2553802	gene_12905	Repressed during mycorrhization	4 wpi only	E	XI	NA	NA	NA	NA	NA	NA	NA	NA	NA	NA	NA	NA	Unknown	Unknown	OG0010873	3.7604	3.83376	4.22046	0	0	0	0	0.255783	0.135404	0.325908	0.407051	0.269316	-5.88989	0.468061	-4.55358	0.0366274	-2.87165	1
Lacdel1|2571199	Lacdel1	2571199	gene_16697	Repressed during mycorrhization	4 and 6 wpi	D	XI	NA	NA	NA	NA	NA	NA	NA	NA	NA	NA	NA	NA	Unknown	Unknown	OG0000662	21.9533	25.1	32.7738	8.29263	7.96928	8.33167	1.89025	2.55636	1.28301	1.1013	2.01948	0.543038	-1.54087	1	-3.35158	0.00024472	-4.02331	1.16e-07
Lacdel1|2651993	Lacdel1	2651993	gene_12285	Repressed during mycorrhization	4 and 6 wpi	E	XI	Secreted	NA	NA	NA	NA	NA	NA	3.4.23.25	Saccharopepsin.	PF00026	Asp	NA	Protease	Pepsin (A1)	OG0010017	6.45709	8.35886	7.96249	3.10682	3.52206	4.25973	0.906558	0.582892	0.588455	0.741962	0.544481	0.791244	-1.09493	1	-4.16054	0.000432815	-4.32107	0.00024765
Lacdel1|2672458	Lacdel1	2672458	gene_4413	Repressed during mycorrhization	4 and 6 wpi	A	XI	Secreted	CAH17527|GGGX|abH03	NA	NA	NA	NA	NA	3.1.1.3	Triacylglycerol lipase.	PF00135	COesterase	Signal transduction mechanisms	Lipase	Triacylglycerol lipase.	OG0008064	778.227	383.014	362.512	27.7024	40.091	30.228	7.97414	10.2578	10.8838	10.9401	11.0994	12.7656	-3.83623	2.38e-08	-5.30257	1.58e-32	-5.03515	1.29e-27
Lacdel1|273691	Lacdel1	273691	gene_20368	Repressed during mycorrhization	4 wpi only	D	XI	NA	NA	NA	NA	NA	NA	NA	NA	NA	PF08693	SKG6	NA	Other function	Holds a SKG6 domain	OG0001085	50.8497	31.8825	34.265	13.9701	15.8807	14.7896	4.65729	3.61607	3.66697	7.07505	6.65414	6.50415	-1.25895	1	-2.82686	0.0112239	-2.12527	1
Lacdel1|596139	Lacdel1	596139	gene_517	Repressed during mycorrhization	4 wpi only	D	XI	NA	NA	NA	NA	NA	NA	NA	NA	NA	NA	NA	NA	Unknown	Unknown	OG0011616	18.4161	17.0571	16.1743	12.3784	11.7021	14.043	1.64067	1.49498	1.57032	4.05415	5.04042	3.57906	-0.284378	1	-3.06283	4.78e-05	-1.57482	1
Lacdel1|631683	Lacdel1	631683	gene_899	Repressed during mycorrhization	4 and 6 wpi	D	XI	NA	NA	NA	NA	NA	NA	NA	NA	NA	NA	NA	NA	Unknown	Unknown	OG0002209	21.0197	13.2775	24.9491	5.8143	7.02647	7.43028	0.97807	0.867236	0.796712	0.412022	1.14786	0.441517	-1.53061	1	-4.54956	0.000132647	-4.73641	7.69e-05
Lacdel1|721640	Lacdel1	721640	gene_16972	Repressed during mycorrhization	6 wpi only	D	XI	NA	NA	NA	NA	NA	NA	NA	2.2.1.2	Transaldolase.	PF00923	TAL_FSA	Carbohydrate transport and metabolism	Other function	Transaldolase.	OG0002164	20.9271	19.2556	18.1907	22.5146	26.4979	22.1004	5.34076	5.81633	3.35925	2.69877	1.67889	1.93869	0.442463	1	-1.70348	1	-2.99593	0.000983984
Lacdel1|862082	Lacdel1	862082	gene_23302	Repressed during mycorrhization	4 and 6 wpi	A	XI	SSP	NA	NA	NA	NA	NA	NA	NA	NA	NA	NA	NA	Unknown	Unknown	OG0000580	141.859	143.462	163.994	63.9265	29.1467	62.3471	1.61745	0.63465	1.21728	3.18665	4.28249	3.06069	-1.3742	1	-6.78488	5.59e-27	-4.9201	8.39e-18
Lacdel1|MSTRG.4430	Lacdel1	NA	MSTRG.4430	Repressed during mycorrhization	4 and 6 wpi	E	XI	NA	NA	NA	NA	NA	NA	NA	NA	NA	PF00026	Asp	NA	Protease	Pepsin (A1)	OG0016499	6.04446	4.25636	4.87225	6.79122	6.20745	6.67867	0.235497	0.197547	0.032053	0.530365	0.196145	0.182177	0.610251	1	-4.60448	0.000137941	-3.30006	0.0350239
Lacdel1|MSTRG.5239	Lacdel1	NA	MSTRG.5239	Repressed during mycorrhization	4 and 6 wpi	D	XI	NA	NA	NA	NA	NA	NA	NA	NA	NA	PF12937	F-box-like	NA	Other function	Holds a F-box domain	OG0002794	10.1089	11.5083	11.433	17.5311	20.9208	19.1099	0.396971	0.863312	0.942767	0.927533	1.31759	1.21093	1.02002	1	-3.61509	1.08e-07	-2.76279	0.0230502
Lacdel1|MSTRG.9318	Lacdel1	NA	MSTRG.9318	Repressed during mycorrhization	4 wpi only	E	XI	NA	NA	NA	NA	NA	NA	NA	NA	NA	NA	NA	NA	Unknown	Unknown	OG0010935	12.6896	12.6731	14.8913	1.74985	1.65501	3.23256	1.344	1.63013	1.14141	2.90958	4.63621	3.28582	-2.4529	1	-2.83688	0.0396689	-1.52749	1
Lacdel1|MSTRG.9384	Lacdel1	NA	MSTRG.9384	Repressed during mycorrhization	4 and 6 wpi	A	XI	NA	NA	NA	NA	NA	NA	NA	NA	NA	NA	NA	NA	Unknown	Unknown	OG0016695	100.947	101.979	99.7518	165.706	153.74	130.597	3.8122	4.52947	3.34346	3.50286	3.49335	2.1727	0.706733	1	-4.27683	1.78e-33	-4.67114	5.81e-42
Lacdel1|1017916	Lacdel1	1017916	gene_22764	Repressed during mycorrhization	6 wpi only	D	XIII	NA	NA	NA	NA	NA	NA	NA	NA	NA	NA	NA	NA	Unknown	Unknown	OG0002272	53.7485	52.482	54.1982	25.5743	21.6698	17.1906	5.76464	12.2949	10.9071	7.32404	5.44277	6.45809	-1.19608	1	-2.14579	1	-2.8201	0.0370442
Lacdel1|2345978	Lacdel1	2345978	gene_3599	Repressed during mycorrhization	4 and 6 wpi	A	XIII	SSP	NA	NA	NA	NA	NA	NA	NA	NA	NA	NA	NA	Unknown	Unknown	OG0012449	243.884	185.508	178.501	54.3475	59.166	66.5522	20.7599	21.1228	20.638	18.6996	24.7444	21.9842	-1.63541	1	-2.90621	4.38e-06	-2.76897	0.000201401
Lacdel1|2371369	Lacdel1	2371369	gene_6874	Repressed during mycorrhization	6 wpi only	D	XIII	NA	NA	NA	NA	NA	NA	NA	NA	NA	NA	NA	NA	Unknown	Unknown	OG0000388	25.991	27.8579	26.4078	25.7785	26.7615	28.6731	10.8956	14.7504	9.25346	3.08503	2.94169	2.29466	0.159105	1	-0.772848	1	-2.79937	0.0123547
Lacdel1|2371828	Lacdel1	2371828	gene_6896	Repressed during mycorrhization	6 wpi only	E	XIII	NA	NA	NA	NA	NA	NA	NA	NA	NA	NA	NA	NA	Unknown	Unknown	OG0000388	8.14308	7.68257	10.0291	3.30607	5.34443	4.82698	1.22329	3.19538	0.671405	0	0.417259	0	-0.974757	1	-2.05551	1	-5.12994	0.000203856
Lacdel1|2387637	Lacdel1	2387637	gene_11438	Repressed during mycorrhization	4 and 6 wpi	G	XIII	NA	NA	NA	NA	13c1__1C3K Jacalin-like	NA	NA	NA	NA	NA	NA	NA	Lectin	Jacalin-like	OG0007189	4701.12	5124.38	5119.09	1109.71	741.261	1492.13	330.062	435.134	513.326	687.682	262.481	425.234	-2.01801	1	-3.16196	0.00616283	-3.04798	0.0259593
Lacdel1|2403423	Lacdel1	2403423	gene_10469	Repressed during mycorrhization	4 wpi only	A	XIII	NA	NA	NA	NA	NA	NA	NA	NA	NA	NA	NA	NA	Unknown	Unknown	OG0008788	189.524	117.111	142.369	39.0604	60.429	53.1433	11.7244	7.25017	8.07515	16.5673	23.082	17.695	-1.49539	1	-3.68797	2.02e-08	-2.68696	0.2266
Lacdel1|2415218	Lacdel1	2415218	gene_13077	Repressed during mycorrhization	4 and 6 wpi	G	XIII	NA	NA	CE4	Hemicellulose	NA	NA	NA	3.5.1.41	Chitin deacetylase.	PF01522	Polysacc_deac_1	NA	CAZyme	Carbohydrate Esterase	OG0001018	2926.75	2926.39	2900.64	520.663	567.31	689.04	231.971	209.646	202.631	273.772	152.371	162.953	-2.25919	1	-3.39824	1.16e-08	-3.55875	1.08e-10
Lacdel1|2466926	Lacdel1	2466926	gene_24717	Repressed during mycorrhization	6 wpi only	E	XIII	NA	NA	NA	NA	NA	NA	NA	NA	NA	NA	NA	NA	Unknown	Unknown	OG0012600	10.2891	7.01019	12.5862	2.88611	3.36837	5.48728	0.649409	0	0.732339	0	0	0	-1.23187	1	-3.76312	0.116849	-5.78785	0.0164505
Lacdel1|2469414	Lacdel1	2469414	gene_20150	Repressed during mycorrhization	6 wpi only	D	XIII	NA	NA	NA	NA	NA	NA	NA	NA	NA	NA	NA	NA	Unknown	Unknown	OG0000388	16.194	16.7047	21.4051	21.442	17.5964	18.123	2.66024	3.85761	1.60637	0	0	0	0.196348	1	-2.23362	1	-7.72864	9.45e-05
Lacdel1|2522422	Lacdel1	2522422	gene_8196	Repressed during mycorrhization	4 and 6 wpi	A	XIII	SSP	NA	NA	NA	NA	NA	NA	NA	NA	NA	NA	NA	Unknown	Unknown	OG0010167	443.442	484.056	430.249	310.012	87.7942	348.464	18.6223	12.0874	14.2837	27.4311	24.195	20.1673	-0.673186	1	-4.37162	1.06e-08	-3.79048	5.3e-05
Lacdel1|2546965	Lacdel1	2546965	gene_920	Repressed during mycorrhization	6 wpi only	E	XIII	NA	NA	NA	NA	NA	NA	NA	NA	NA	NA	NA	NA	Unknown	Unknown	OG0001072	10.8874	11.4159	14.3686	4.73811	4.08459	4.2585	1.74417	1.01024	1.73922	1.49151	1.11017	0.624028	-1.18303	1	-2.51485	1	-3.1692	0.00583278
Lacdel1|2551074	Lacdel1	2551074	gene_6890	Repressed during mycorrhization	6 wpi only	D	XIII	NA	NA	NA	NA	NA	NA	NA	NA	NA	NA	NA	NA	Unknown	Unknown	OG0000417	33.4588	32.3453	31.4854	15.6235	9.63086	8.66692	3.11225	6.42896	5.58777	4.02376	2.93894	2.06775	-1.35666	1	-2.27613	1	-2.979	0.0394415
Lacdel1|2554411	Lacdel1	2554411	gene_12717	Repressed during mycorrhization	4 and 6 wpi	A	XIII	NA	NA	NA	NA	NA	NA	NA	NA	NA	NA	NA	NA	Unknown	Unknown	OG0012254	169.5	161.998	168.643	141.844	133.922	142.337	34.4939	33.5835	38.8853	24.9538	28.0137	22.5779	-0.123198	1	-3.16817	0.000101345	-3.74243	1.57e-08
Lacdel1|412063	Lacdel1	412063	gene_6866	Repressed during mycorrhization	6 wpi only	D	XIII	NA	NA	NA	NA	NA	NA	NA	NA	NA	NA	NA	NA	Unknown	Unknown	OG0000388	22.8837	23.109	23.0564	22.018	16.9422	22.8206	14.8972	16.7351	14.1703	1.1736	0.816471	0.853679	0.0922943	1	-0.161776	1	-3.10596	8.31e-05
Lacdel1|413372	Lacdel1	413372	gene_6873	Repressed during mycorrhization	6 wpi only	D	XIII	NA	NA	NA	NA	NA	NA	NA	NA	NA	NA	NA	NA	Unknown	Unknown	OG0000417	36.4587	32.411	38.4266	15.0999	11.5887	10.5854	3.52827	7.12714	5.91295	4.19478	2.53952	2.64673	-1.36932	1	-2.31395	1	-3.16175	0.000815051
Lacdel1|416685	Lacdel1	416685	gene_6901	Repressed during mycorrhization	6 wpi only	D	XIII	NA	NA	NA	NA	NA	NA	NA	NA	NA	NA	NA	NA	Unknown	Unknown	OG0000417	21.0845	22.8611	22.8238	10.1318	7.84907	7.46813	2.12167	5.74801	3.71204	2.06391	1.62336	1.9666	-1.26348	1	-2.0917	1	-3.22847	0.00583278
Lacdel1|1090130	Lacdel1	1090130	gene_10224	Repressed during mycorrhization	4 and 6 wpi	A	XII	NA	NA	NA	NA	NA	NA	NA	NA	NA	NA	NA	NA	Unknown	Unknown	OG0008504	674.332	717.465	712.675	589.129	880.373	708.54	35.9304	52.1869	49.5014	34.5402	22.6989	23.3254	0.344096	1	-3.38109	1.31e-10	-4.19472	5.3e-26
Lacdel1|1301064	Lacdel1	1301064	gene_9526	Repressed during mycorrhization	6 wpi only	E	XII	NA	NA	NA	NA	NA	NA	NA	NA	NA	PF13391	HNH_2	NA	Other function	HNH endonuclease	OG0000965	13.7746	10.6365	14.0789	3.49086	4.25241	6.09425	2.29452	3.15692	2.77853	1.2213	0.423866	1.6546	-1.28496	1	-1.75712	1	-3.09596	0.0184345
Lacdel1|1308703	Lacdel1	1308703	gene_9615	Repressed during mycorrhization	4 wpi only	D	XII	NA	NA	NA	NA	NA	NA	NA	NA	NA	NA	NA	NA	Unknown	Unknown	OG0007915	35.8887	33.3654	31.5869	9.18762	7.92627	6.44317	2.7082	3.71523	2.13691	6.77118	6.56109	6.21424	-2.00943	1	-3.09551	0.000431315	-1.96959	1
Lacdel1|1513189	Lacdel1	1513189	gene_3588	Repressed during mycorrhization	4 and 6 wpi	A	XII	NA	NA	NA	NA	24c1__3QDY Fungal fruit body lectin	NA	NA	NA	NA	PF07367	FB_lectin	NA	Lectin	Fungal fruit body lectin	OG0000849	261.211	131.265	205.504	30.0477	46.7942	42.229	5.47802	4.5032	3.37584	4.12071	4.87863	7.22386	-2.19292	1	-5.19068	2.31e-22	-4.88472	3.18e-19
Lacdel1|1774192	Lacdel1	1774192	gene_11211	Repressed during mycorrhization	4 wpi only	E	XII	NA	NA	NA	NA	NA	NA	NA	NA	NA	NA	NA	NA	Unknown	Unknown	OG0000377	10.181	9.79765	12.1554	4.93215	5.49857	5.44109	0.703111	1.17688	0.34743	1.76567	1.81129	1.17643	-0.874822	1	-3.35096	0.00192409	-2.47347	1
Lacdel1|1886164	Lacdel1	1886164	gene_4479	Repressed during mycorrhization	4 and 6 wpi	A	XII	SSP	NA	NA	NA	NA	NA	NA	NA	NA	NA	NA	NA	Unknown	Unknown	OG0010231	99.9228	69.176	98.3685	56.423	56.5549	50.9481	3.47415	2.29118	3.13725	2.72844	2.52624	3.67502	-0.640845	1	-4.41209	3.68e-19	-4.50837	3.23e-20
Lacdel1|189169	Lacdel1	189169	gene_18119	Repressed during mycorrhization	4 and 6 wpi	D	XII	NA	NA	NA	NA	NA	NA	NA	NA	NA	NA	NA	NA	Unknown	Unknown	OG0000580	60.8291	49.3434	63.252	27.7781	14.3244	31.4826	0.58101	0	0.213068	1.20903	2.12099	2.36396	-1.16419	1	-7.43959	4.18e-08	-4.24985	1.14e-06
Lacdel1|2184212	Lacdel1	2184212	gene_8062	Repressed during mycorrhization	6 wpi only	A	XII	NA	NA	NA	NA	NA	NA	NA	NA	NA	NA	NA	NA	Unknown	Unknown	OG0008340	578.372	821.546	560.481	713.132	853.287	633.372	98.9559	49.074	37.3702	57.5784	63.7512	44.5619	0.308784	1	-2.92196	0.0841248	-3.14532	0.0095652
Lacdel1|2222338	Lacdel1	2222338	gene_8282	Repressed during mycorrhization	4 and 6 wpi	A	XII	NA	NA	NA	NA	NA	NA	NA	NA	NA	NA	NA	NA	Unknown	Unknown	OG0000187	167.919	83.8523	96.3711	86.8503	64.1513	81.9943	12.1264	11.1324	10.8442	7.70851	13.728	7.64057	-0.448274	1	-2.93728	0.0306726	-3.18807	0.0014956
Lacdel1|2232475	Lacdel1	2232475	gene_16183	Repressed during mycorrhization	6 wpi only	E	XII	NA	NA	NA	NA	NA	NA	NA	NA	NA	PF12796,PF13637,PF13606,PF13857,PF00023	Ank_2,Ank_4,Ank_3,Ank_5,Ank	Cell wall/membrane/envelope biogenesis	Other function	Holds ankyrin repeats	OG0004403	4.44961	4.31899	6.07478	5.26949	3.2368	3.66428	0.380916	0.759454	0.491964	0	0.108456	0.217525	-0.0836321	1	-3.0822	0.362042	-4.42706	0.00585695
Lacdel1|2312445	Lacdel1	2312445	gene_4478	Repressed during mycorrhization	4 and 6 wpi	A	XII	SSP	NA	NA	NA	NA	NA	NA	NA	NA	NA	NA	NA	Unknown	Unknown	OG0003784	825.782	624.427	1049.89	670.85	643.432	728.698	27.5793	17.3096	16.1564	16.8782	23.5034	23.6801	-0.203771	1	-4.99104	2.32e-30	-4.9326	3.18e-29
Lacdel1|2313794	Lacdel1	2313794	gene_6311	Repressed during mycorrhization	4 and 6 wpi	D	XII	NA	NA	NA	NA	NA	NA	NA	NA	NA	PF17109	Goodbye	NA	Other function	Holds a Goodbye domain	OG0008482	100.808	111.577	94.6988	17.2094	16.2304	10.7789	0	1.633	0.519282	1.36764	0.810724	0.360722	-2.63053	1	-6.42589	5.88e-25	-6.43744	3.67e-25
Lacdel1|2313800	Lacdel1	2313800	gene_6320	Repressed during mycorrhization	4 wpi only	E	XII	NA	NA	NA	NA	NA	NA	NA	NA	NA	PF17109	Goodbye	NA	Other function	Holds a Goodbye domain	OG0008482	10.2183	7.96971	8.64061	1.07856	1.3562	0.43851	0.229181	0	0.466208	0.512944	1.58107	0.662963	-3.08458	1	-3.90667	0.0334058	-2.86323	1
Lacdel1|2316179	Lacdel1	2316179	gene_10225	Repressed during mycorrhization	4 and 6 wpi	A	XII	NA	NA	NA	NA	NA	NA	NA	NA	NA	NA	NA	NA	Unknown	Unknown	OG0015349	808.055	789.307	809.487	376.014	419.434	439.063	22.9887	44.7568	34.1251	26.5855	19.6461	16.3905	-0.914498	1	-4.15869	5.42e-29	-4.88069	2.65e-47
Lacdel1|2317438	Lacdel1	2317438	gene_11096	Repressed during mycorrhization	4 wpi only	D	XII	NA	NA	NA	NA	NA	NA	NA	NA	NA	PF17109	Goodbye	NA	Other function	Holds a Goodbye domain	OG0000079	16.6494	16.0441	17.9315	7.47978	7.53892	6.80091	0.911493	0.631967	1.37594	2.57933	4.81814	2.5033	-1.07609	1	-4.14395	1.7e-05	-2.23009	1
Lacdel1|2323812	Lacdel1	2323812	gene_16960	Repressed during mycorrhization	4 wpi only	A	XII	NA	NA	NA	NA	NA	NA	NA	NA	NA	PF17109,PF05729,PF13191	Goodbye,NACHT,AAA_16	NA	Other function	NACHT	OG0000004	68.8959	66.5832	60.5109	32.6792	28.7022	25.5785	5.45509	9.71505	8.69457	19.9685	23.8049	20.7277	-1.01782	1	-2.64727	0.00279858	-1.20693	1
Lacdel1|2336866	Lacdel1	2336866	gene_782	Repressed during mycorrhization	4 and 6 wpi	A	XII	NA	NA	NA	NA	NA	NA	NA	NA	NA	PF12223	DUF3602	NA	Unknown	Unknown	OG0009277	1904.83	1807.04	1894.61	1525.7	1122.63	1316.81	80.9456	66.3397	42.1095	23.8272	19.1738	15.1921	-0.380777	1	-4.68191	5.08e-16	-6.88342	1.64e-50
Lacdel1|2367819	Lacdel1	2367819	gene_7200	Repressed during mycorrhization	6 wpi only	D	XII	NA	NA	NA	NA	NA	NA	NA	NA	NA	PF03372	Exo_endo_phos	NA	Other function	Endonuclease/Exonuclease/phosphatase	OG0002581	10.1342	10.6344	11.4131	7.86229	8.20471	6.79213	1.13795	1.41889	1.72454	0.852859	0.661097	1.01671	-0.147805	1	-2.69776	0.25164	-3.33682	0.00109781
Lacdel1|2369804	Lacdel1	2369804	gene_6740	Repressed during mycorrhization	4 and 6 wpi	D	XII	SSP	NA	NA	NA	NA	NA	NA	NA	NA	NA	NA	NA	Unknown	Unknown	OG0009214	80.6565	71.5638	82.4	28.0362	26.1477	37.8477	2.33553	2.96674	3.84396	3.02525	2.30137	2.64161	-1.17288	1	-4.62823	4.83e-14	-4.70572	2.06e-14
Lacdel1|2398055	Lacdel1	2398055	gene_10307	Repressed during mycorrhization	4 and 6 wpi	D	XII	NA	NA	NA	NA	NA	NA	NA	NA	NA	NA	NA	NA	Unknown	Unknown	OG0015711	62.6202	68.8307	65.9249	26.1965	21.6927	18.5202	2.39805	4.56312	5.5713	5.62757	6.80862	3.40596	-1.43941	1	-3.62406	9.14e-10	-3.26577	2.04e-06
Lacdel1|2423084	Lacdel1	2423084	gene_14358	Repressed during mycorrhization	6 wpi only	D	XII	NA	NA	NA	NA	NA	NA	NA	NA	NA	NA	NA	NA	Unknown	Unknown	OG0001267	29.7447	26.3826	26.6743	14.5903	15.4571	19.0907	3.45869	3.17295	1.4564	1.29747	0.983897	1.2087	-0.851463	1	-3.1372	0.213003	-4.52859	0.0014166
Lacdel1|2423209	Lacdel1	2423209	gene_14361	Repressed during mycorrhization	6 wpi only	D	XII	NA	NA	NA	NA	NA	NA	NA	NA	NA	NA	NA	NA	Unknown	Unknown	OG0001267	28.1689	28.0834	23.3504	15.773	15.3592	21.2148	3.0023	3.22302	2.34202	1.45145	0.764651	1.07086	-0.30082	1	-2.13395	1	-4.42428	0.00549639
Lacdel1|2514504	Lacdel1	2514504	gene_3600	Repressed during mycorrhization	4 and 6 wpi	A	XII	NA	NA	NA	NA	NA	NA	NA	NA	NA	NA	NA	NA	Unknown	Unknown	OG0012627	145.785	118.052	107.86	20.5587	28.7131	26.8369	7.23188	6.35501	7.9879	7.25188	6.44799	10.5677	-2.05589	1	-3.66211	5.52e-10	-3.38884	2.04e-07
Lacdel1|2515408	Lacdel1	2515408	gene_5444	Repressed during mycorrhization	6 wpi only	A	XII	NA	NA	NA	NA	NA	NA	NA	NA	NA	NA	NA	NA	Unknown	Unknown	OG0010787	97.9619	103.026	95.2734	109.597	124.1	120.167	40.2329	32.9185	26.6252	12.0756	12.3107	9.17215	0.387265	1	-1.16604	1	-2.75722	0.00052626
Lacdel1|2518810	Lacdel1	2518810	gene_6635	Repressed during mycorrhization	4 and 6 wpi	D	XII	NA	NA	NA	NA	NA	NA	NA	NA	NA	NA	NA	NA	Unknown	Unknown	OG0008645	55.1462	48.264	54.6919	10.4397	11.2251	14.5774	3.26876	3.04772	2.8533	3.09829	2.18734	1.48179	-1.94486	1	-3.56716	5.96e-11	-4.05423	5.16e-17
Lacdel1|2523812	Lacdel1	2523812	gene_11650	Repressed during mycorrhization	6 wpi only	D	XII	NA	NA	NA	NA	NA	NA	NA	NA	NA	NA	NA	NA	Unknown	Unknown	OG0001201	40.1376	42.4188	42.583	24.8866	18.3363	24.4634	5.71235	6.62529	6.40412	6.07194	5.90688	4.1945	-0.76064	1	-2.33156	1	-2.59044	0.0393236
Lacdel1|2526378	Lacdel1	2526378	gene_14357	Repressed during mycorrhization	6 wpi only	E	XII	NA	NA	NA	NA	NA	NA	NA	NA	NA	NA	NA	NA	Unknown	Unknown	OG0000508	15.2954	11.9565	14.9148	4.31198	3.23059	2.91961	0.806564	0.989671	1.34005	0.540668	0	0	-1.95467	1	-3.4633	0.083953	-5.06856	0.00271371
Lacdel1|2553853	Lacdel1	2553853	gene_10650	Repressed during mycorrhization	4 wpi only	A	XII	NA	NA	NA	NA	NA	NA	NA	NA	NA	PF17109	Goodbye	NA	Other function	Holds a Goodbye domain	OG0009551	109.321	115.309	116.775	33.6527	28.8175	27.6623	5.75877	11.1194	12.9391	15.5078	12.7329	17.2171	-1.75719	1	-3.07667	2.11e-05	-2.50137	0.408
Lacdel1|2554227	Lacdel1	2554227	gene_12417	Repressed during mycorrhization	4 wpi only	D	XII	NA	NA	NA	NA	NA	NA	NA	NA	NA	PF17109	Goodbye	NA	Other function	Holds a Goodbye domain	OG0000081	53.6043	52.5531	52.0491	11.872	12.3149	8.1647	2.67668	8.27121	5.54457	7.44508	7.50499	7.55311	-2.09742	1	-2.84418	0.00877362	-2.50585	0.553083
Lacdel1|2556335	Lacdel1	2556335	gene_14220	Repressed during mycorrhization	4 wpi only	D	XII	NA	NA	NA	NA	NA	NA	NA	NA	NA	NA	NA	NA	Unknown	Unknown	OG0016121	37.5442	46.9489	43.3181	31.3143	27.0008	23.6358	4.07371	6.13141	4.25459	6.24854	7.36215	5.71723	-0.501647	1	-2.72802	0.00510328	-2.32351	1
Lacdel1|2561018	Lacdel1	2561018	gene_24764	Repressed during mycorrhization	4 and 6 wpi	D	XII	NA	NA	NA	NA	NA	NA	NA	NA	NA	NA	NA	NA	Unknown	Unknown	OG0000099	36.9217	36.2064	31.8706	38.5569	32.5649	32.1601	2.46792	5.65318	3.71224	3.75745	4.45163	2.6069	0.0851748	1	-2.70906	0.039458	-2.90544	0.00247371
Lacdel1|2580767	Lacdel1	2580767	gene_21283	Repressed during mycorrhization	4 wpi only	A	XII	NA	NA	NA	NA	NA	NA	NA	NA	NA	NA	NA	NA	Unknown	Unknown	OG0012815	47.5314	53.9512	48.3662	37.201	34.3301	33.0868	5.94598	5.45366	5.32605	8.17305	12.5035	7.43395	-0.425958	1	-2.80623	0.000372035	-2.13148	1
Lacdel1|2596524	Lacdel1	2596524	gene_19944	Repressed during mycorrhization	4 wpi only	D	XII	NA	NA	NA	NA	NA	NA	NA	NA	NA	NA	NA	Defense mechanisms	Unknown	Unknown	OG0010879	43.4128	41.8093	47.4649	9.33643	8.68685	4.45973	1.27862	5.34583	3.9567	6.12594	4.04006	6.36907	-2.36978	1	-3.15689	0.0462132	-2.64258	1
Lacdel1|2631667	Lacdel1	2631667	gene_9840	Repressed during mycorrhization	4 and 6 wpi	D	XII	NA	NA	NA	NA	NA	NA	NA	NA	NA	NA	NA	NA	Unknown	Unknown	OG0007018	31.3782	37.7409	30.563	35.5633	41.3051	35.8184	7.84269	7.2637	6.6812	4.99343	5.34357	6.45239	0.206068	1	-2.67647	0.0231905	-2.82527	0.00239792
Lacdel1|273773	Lacdel1	273773	gene_20372	Repressed during mycorrhization	4 wpi only	A	XII	NA	NA	NA	NA	NA	NA	NA	NA	NA	NA	NA	NA	Unknown	Unknown	OG0000368	179.21	184.489	163.385	159.456	168.466	167.828	19.9058	16.0113	19.7311	35.689	43.0696	24.7758	0.0124342	1	-2.83395	4.31e-05	-1.98313	1
Lacdel1|327802	Lacdel1	327802	gene_17378	Repressed during mycorrhization	4 and 6 wpi	D	XII	NA	NA	NA	NA	NA	NA	NA	NA	NA	NA	NA	NA	Unknown	Unknown	OG0016271	24.8536	29.9774	26.6749	14.3329	12.8926	13.1484	2.52747	3.98254	1.94274	3.16586	3.27683	2.17555	-0.965308	1	-2.87846	0.0449638	-3.22534	0.00172978
Lacdel1|999443	Lacdel1	999443	gene_3237	Repressed during mycorrhization	4 wpi only	D	XII	NA	NA	NA	NA	NA	NA	NA	NA	NA	PF12796,PF13637,PF13857,PF00023,PF13606,PF05729	Ank_2,Ank_4,Ank_5,Ank,Ank_3,NACHT	Cell wall/membrane/envelope biogenesis	Other function	NACHT	OG0009995	34.9259	31.5322	32.0585	21.6595	19.3913	20.1901	4.50495	4.87204	3.92603	4.15415	6.12599	4.69151	-0.594279	1	-2.48885	0.0380206	-2.34497	0.517872
Lacdel1|MSTRG.7081	Lacdel1	NA	MSTRG.7081	Repressed during mycorrhization	4 wpi only	E	XII	NA	NA	NA	NA	NA	NA	NA	NA	NA	NA	NA	NA	Unknown	Unknown	OG0009421	5.32192	6.83829	6.85468	1.50493	1.12513	0.766914	0.481863	0.498707	0.231451	1.33209	1.90626	0.87562	-2.28706	1	-3.6248	0.0463643	-1.7587	1
Lacdel1|MSTRG.7252	Lacdel1	NA	MSTRG.7252	Repressed during mycorrhization	4 and 6 wpi	A	XII	NA	NA	NA	NA	NA	NA	NA	NA	NA	PF00023,PF12796,PF13606,PF13637,PF13857	Ank,Ank_2,Ank_3,Ank_4,Ank_5	NA	Protease	Subtilisin (S8)	OG0004531	114.765	112.804	126.12	77.5349	102.832	89.25	8.51902	10.3406	8.08987	6.60552	5.04098	4.37832	-0.245443	1	-3.29542	1.45e-12	-4.04495	1.19e-30
Lacdel1|MSTRG.727	Lacdel1	NA	MSTRG.727	Repressed during mycorrhization	4 and 6 wpi	A	XII	NA	116208038|GX|abH09	NA	NA	NA	NA	NA	NA	NA	PF00023,PF12796,PF13606,PF13637,PF13857	Ank,Ank_2,Ank_3,Ank_4,Ank_5	NA	Unknown	Inconsistent annotation	OG0001641	147.713	154.544	127.97	57.0983	52.3537	45.7141	2.64679	3.18387	3.15172	3.68617	2.91702	2.23442	-1.48831	1	-5.24069	6.18e-71	-5.22154	3.47e-70
Lacdel1|MSTRG.7388	Lacdel1	NA	MSTRG.7388	Repressed during mycorrhization	4 and 6 wpi	D	XII	NA	NA	NA	NA	NA	NA	NA	NA	NA	NA	NA	NA	Unknown	Unknown	OG0003784	57.6358	50.9652	87.5502	54.7449	50.9889	52.4861	2.24663	1.02552	0.820001	1.5724	2.2331	1.73432	-0.163389	1	-5.18839	9.67e-19	-4.71472	4.34e-14
Lacdel1|MSTRG.8143	Lacdel1	NA	MSTRG.8143	Repressed during mycorrhization	4 wpi only	D	XII	NA	NA	NA	NA	NA	NA	NA	NA	NA	NA	NA	NA	Unknown	Unknown	OG0003509	13.5965	16.8417	18.8381	10.0449	10.5327	15.9995	3.41707	3.07623	2.99939	4.53437	7.96636	9.5966	-0.422181	1	-3.4757	0.00194215	0.255773	1
Lacdel1|1272169	Lacdel1	1272169	gene_2500	Repressed during mycorrhization	4 and 6 wpi	A	XIV	NA	NA	NA	NA	NA	NA	NA	NA	NA	NA	NA	NA	Unknown	Unknown	OG0010177	73.3126	86.7846	79.5328	26.7591	36.2185	40.9071	4.42317	7.11563	7.67289	6.10801	4.55	8.25196	-1.09553	1	-3.30346	8.52e-07	-3.22166	5.24e-06
Lacdel1|1549483	Lacdel1	1549483	gene_12898	Repressed during mycorrhization	4 wpi only	E	XIV	SSP	NA	NA	NA	NA	NA	NA	NA	NA	NA	NA	NA	Unknown	Unknown	OG0015012	7.28598	5.09127	6.86116	0.637719	0.654398	1.52651	0.30004	0.149796	0	1.01805	0.506427	0.613652	-2.8087	1	-5.04867	0.0231905	-2.47869	1
Lacdel1|1598334	Lacdel1	1598334	gene_10880	Repressed during mycorrhization	4 wpi only	D	XIV	SSP	NA	NA	NA	NA	NA	NA	NA	NA	NA	NA	NA	Unknown	Unknown	OG0015024	26.5194	22.6203	18.64	7.93638	7.26727	9.89219	1.39367	1.62811	0.311975	3.7493	3.80462	1.93782	-1.36601	1	-3.62593	0.000839257	-2.43419	1
Lacdel1|1855257	Lacdel1	1855257	gene_13544	Repressed during mycorrhization	4 wpi only	D	XIV	NA	NA	NA	NA	NA	NA	NA	NA	NA	NA	NA	NA	Unknown	Unknown	OG0015091	16.4438	16.9433	13.3855	11.417	8.70112	7.70932	0.744806	0.532338	1.27756	2.72091	4.46966	2.14291	-0.575785	1	-3.53435	0.00396223	-1.84031	1
Lacdel1|2312239	Lacdel1	2312239	gene_4186	Repressed during mycorrhization	4 wpi only	A	XIV	NA	NA	NA	NA	NA	NA	NA	NA	NA	NA	NA	NA	Unknown	Unknown	OG0015259	51.1915	54.4978	36.9167	80.9073	87.1667	89.1435	3.62898	3.96992	4.17363	5.22962	4.95207	4.14953	1.00259	1	-2.80957	0.0314758	-2.66314	0.16512
Lacdel1|2317989	Lacdel1	2317989	gene_11632	Repressed during mycorrhization	4 and 6 wpi	D	XIV	NA	NA	NA	NA	NA	NA	NA	NA	NA	NA	NA	NA	Unknown	Unknown	OG0010602	31.7553	40.4538	31.5217	51.9327	50.3011	46.8633	0.814749	1.25081	1.87918	2.0674	1.10739	1.14866	0.686072	1	-4.02374	2.13e-13	-3.92846	1.24e-12
Lacdel1|2344293	Lacdel1	2344293	gene_3350	Repressed during mycorrhization	6 wpi only	D	XIV	NA	NA	NA	NA	NA	NA	NA	NA	NA	NA	NA	NA	Unknown	Unknown	OG0015586	31.4633	30.4599	27.6483	26.0343	31.8165	31.5629	6.6629	5.86733	5.63776	2.18285	2.01194	2.09819	0.182824	1	-1.98922	1	-4.0586	3.97e-13
Lacdel1|2384514	Lacdel1	2384514	gene_7588	Repressed during mycorrhization	4 wpi only	A	XIV	SSP	NA	NA	NA	NA	NA	NA	NA	NA	NA	NA	NA	Unknown	Unknown	OG0000945	124.268	153.942	126.351	83.2184	104.053	97.5501	13.6899	16.195	10.8454	25.0038	14.4607	10.3844	-0.429422	1	-2.98616	0.00160166	-2.68226	0.125001
Lacdel1|2552991	Lacdel1	2552991	gene_12060	Repressed during mycorrhization	4 wpi only	A	XIV	NA	NA	NA	NA	NA	NA	NA	NA	NA	NA	NA	NA	Unknown	Unknown	OG0016095	83.1191	75.4229	74.9178	47.787	51.5833	37.39	11.9594	7.40204	3.31101	12.9797	8.25333	6.00679	-0.670967	1	-2.99224	0.0298456	-2.64024	0.669009
Lacdel1|323073	Lacdel1	323073	gene_15895	Repressed during mycorrhization	4 wpi only	D	XIV	NA	NA	NA	NA	NA	NA	NA	NA	NA	NA	NA	NA	Unknown	Unknown	OG0010636	34.2235	34.273	32.229	17.8003	15.4516	18.1593	5.51919	2.62514	3.56341	5.70304	5.90496	3.68263	-0.721541	1	-2.69486	0.0441615	-2.36428	1
Lacdel1|MSTRG.10589	Lacdel1	NA	MSTRG.10589	Repressed during mycorrhization	4 wpi only	D	XIV	NA	NA	NA	NA	NA	NA	NA	NA	NA	NA	NA	NA	Unknown	Unknown	OG0012935	10.4298	9.82531	9.2086	9.49369	12.1173	8.62953	0.770629	0.651717	0.647572	0.812145	1.14508	1.18004	0.108727	1	-3.41355	7.7e-06	-2.59803	0.28085
Lacdel1|MSTRG.6957	Lacdel1	NA	MSTRG.6957	Repressed during mycorrhization	4 and 6 wpi	D	XIV	NA	NA	NA	NA	NA	NA	NA	NA	NA	NA	NA	NA	Unknown	Unknown	OG0010390	27.0421	40.4034	33.6234	42.4998	58.074	53.6089	1.40919	1.14765	1.19131	1.31541	1.51512	1.99656	0.769811	1	-4.37675	1.34e-19	-3.94624	7.2e-15
Lacdel1|MSTRG.7085	Lacdel1	NA	MSTRG.7085	Repressed during mycorrhization	4 wpi only	E	XIV	NA	NA	NA	NA	NA	NA	NA	NA	NA	NA	NA	NA	Unknown	Unknown	OG0016612	11.1622	11.1429	8.66431	2.69849	2.21016	1.60684	0.104559	0.861236	0.367984	1.28901	1.48955	1.09106	-2.11452	1	-3.93233	0.000705072	-2.55082	1
Lacdel1|MSTRG.9282	Lacdel1	NA	MSTRG.9282	Repressed during mycorrhization	4 and 6 wpi	G	XIV	NA	NA	NA	NA	NA	NA	NA	NA	NA	NA	NA	NA	Unknown	Unknown	OG0004360	527.376	546.859	423.074	726.244	714.492	581.235	319.841	461.703	342.549	277.228	311.153	375.033	0.0910182	1	-2.83601	0.00975819	-3.07893	0.000161419
Lacdel1|2212489	Lacdel1	2212489	gene_1308	Repressed during mycorrhization	4 wpi only	A	X	NA	NA	NA	NA	NA	NA	NA	NA	NA	PF01613	Flavin_Reduct	NA	Other function	Flavin reductase	OG0006598	615.021	517.675	543.864	333.366	306.48	307.471	41.1596	33.3262	41.3373	70.7872	104.587	53.4807	-0.687369	1	-3.36095	1.17e-08	-2.43545	0.875301
Lacdel1|2216063	Lacdel1	2216063	gene_2499	Repressed during mycorrhization	4 and 6 wpi	A	X	NA	NA	NA	NA	NA	NA	NA	NA	NA	PF00806	PUF	Translation, ribosomal structure and biogenesis	Other function	PUF	OG0007211	105.753	109.215	107.66	58.3703	73.8775	72.0039	8.52447	12.4826	15.4404	9.22602	10.2181	12.7726	-0.494372	1	-2.69897	0.00123826	-2.86995	1.8e-05
Lacdel1|2220299	Lacdel1	2220299	gene_4816	Repressed during mycorrhization	4 and 6 wpi	A	X	Secreted	NA	CE4	Hemicellulose	NA	NA	NA	3.5.1.41	Chitin deacetylase.	PF01522	Polysacc_deac_1	NA	CAZyme	Carbohydrate Esterase	OG0008040	560.004	378.236	456.3	202.6	295.133	247.69	69.9856	38.0581	43.095	43.2809	54.4947	39.3711	-0.814093	1	-2.81966	0.0334058	-2.9729	0.0044855
Lacdel1|2227783	Lacdel1	2227783	gene_12493	Repressed during mycorrhization	6 wpi only	D	X	NA	NA	NA	NA	NA	NA	NA	NA	NA	NA	NA	NA	Unknown	Unknown	OG0000242	18.7364	18.1966	18.2126	5.26478	7.02499	8.95194	2.30864	2.03658	2.69843	2.00522	2.01868	1.20166	-1.27451	1	-2.93713	0.0532354	-3.11158	0.0131669
Lacdel1|2230525	Lacdel1	2230525	gene_15646	Repressed during mycorrhization	4 and 6 wpi	D	X	NA	NA	NA	NA	NA	NA	NA	3.6.3.8	Calcium-transporting ATPase.	PF00689,PF00122,PF13246,PF00702,PF00690	Cation_ATPase_C,E1-E2_ATPase,Cation_ATPase,Hydrolase,Cation_ATPase_N	Inorganic ion transport and metabolism	Transporter/Permease	Calcium-transporting ATPase.	OG0012123	38.2458	41.184	44.4118	37.3633	38.3115	34.7023	4.02258	4.93579	3.83012	5.28715	5.15103	5.54903	0.00908249	1	-2.82794	1.28e-08	-2.52385	0.0014166
Lacdel1|2235299	Lacdel1	2235299	gene_18750	Repressed during mycorrhization	6 wpi only	D	X	NA	NA	NA	NA	NA	NA	NA	NA	NA	NA	NA	NA	Unknown	Unknown	OG0002898	26.1078	31.0195	23.0827	11.1966	18.3356	13.7459	3.44459	3.39486	3.0247	2.48545	2.80456	2.62987	-0.674279	1	-2.4165	1	-2.99099	0.0135242
Lacdel1|2268322	Lacdel1	2268322	gene_13072	Repressed during mycorrhization	4 wpi only	E	X	NA	NA	NA	NA	NA	NA	NA	NA	NA	PF00270,PF00271	DEAD,Helicase_C	Translation, ribosomal structure and biogenesis	Other function	Helicase	OG0000458	18.4584	17.6163	22.2164	1.82778	2.03927	2.65608	1.06623	1.84818	1.68909	2.71125	3.9572	3.50889	-3.03312	0.0700299	-3.27178	0.000110938	-2.25997	1
Lacdel1|2285320	Lacdel1	2285320	gene_2596	Repressed during mycorrhization	6 wpi only	G	X	NA	NA	NA	NA	NA	NA	NA	NA	NA	PF13649,PF13489,PF08241,PF13847,PF08242	Methyltransf_25,Methyltransf_23,Methyltransf_11,Methyltransf_31,Methyltransf_12	General function prediction only ; Lipid transport and metabolism	Other function	Methyltransferase	OG0005069	2187.09	2779.55	2494.85	2751.07	2440.45	2341.62	242.547	570.664	594.413	194.983	99.7639	194.58	0.149713	1	-1.97408	1	-3.48911	1.79e-05
Lacdel1|2339353	Lacdel1	2339353	gene_3045	Repressed during mycorrhization	4 wpi only	D	X	NA	NA	NA	NA	NA	NA	NA	NA	NA	PF00067	p450	Secondary metabolites biosynthesis, transport and catabolism	Cytochrome p450		OG0004682	47.8022	59.6324	54.9271	35.4114	19.4895	16.4364	3.98951	3.47595	4.44941	6.13984	9.44317	5.33367	-1.04558	1	-3.32885	0.000190072	-2.56199	1
Lacdel1|2348112	Lacdel1	2348112	gene_1756	Repressed during mycorrhization	4 wpi only	A	X	NA	NA	NA	NA	NA	NA	NA	NA	NA	PF00999	Na_H_Exchanger	Inorganic ion transport and metabolism	Transporter/Permease	Sodium/hydrogen exchanger	OG0006893	762.956	589.316	523.604	119.179	179.977	153.867	76.1663	62.2806	49.7194	85.4391	106.958	90.8415	-1.9142	1	-2.89042	0.000782573	-2.32183	1
Lacdel1|2392307	Lacdel1	2392307	gene_11074	Repressed during mycorrhization	4 wpi only	D	X	NA	NA	NA	NA	NA	NA	NA	NA	NA	PF00063,PF02736	Myosin_head,Myosin_N	Cytoskeleton	Protease	Protease family M23	OG0011277	33.7058	32.9948	31.4258	8.39784	8.2094	6.08851	1.03511	2.76344	3.47071	3.96874	3.14388	4.24927	-2.03129	1	-3.52978	3.09e-06	-2.69545	0.14549
Lacdel1|2502935	Lacdel1	2502935	gene_260	Repressed during mycorrhization	4 wpi only	A	X	Secreted	NA	NA	NA	NA	NA	NA	NA	NA	NA	NA	NA	Unknown	Unknown	OG0004826	416.024	279.754	303.134	78.6496	87.5929	84.7941	27.0156	30.6836	29.722	52.5317	71.1374	50.5756	-1.87731	1	-3.16407	1.31e-08	-2.13771	1
Lacdel1|2504756	Lacdel1	2504756	gene_5430	Repressed during mycorrhization	4 and 6 wpi	G	X	NA	NA	NA	NA	NA	NA	NA	NA	NA	PF04468	PSP1	General function prediction only	Other function	Holds a PSP1 domain	OG0005597	4017.12	3937.51	3784.39	2768.5	2866.08	2575.55	271.092	239.59	185.845	426.713	290.543	168.807	-0.353695	1	-3.63659	1.26e-07	-3.28559	0.000122774
Lacdel1|2505127	Lacdel1	2505127	gene_5872	Repressed during mycorrhization	4 and 6 wpi	D	X	Secreted	NA	AA1_1	Phenols	NA	NA	NA	1.10.3.2	Laccase.	PF00394,PF07731,PF07732	Cu-oxidase,Cu-oxidase_2,Cu-oxidase_3	Secondary metabolites biosynthesis, transport and catabolism	CAZyme	Laccase	OG0008018	26.4585	32.399	31.6272	15.5013	25.8602	24.2737	0.81876	0.992666	1.28181	1.21493	0.463495	0.69357	-0.279451	1	-4.30996	3.32e-13	-4.77222	7.24e-16
Lacdel1|25069	Lacdel1	25069	gene_1158	Repressed during mycorrhization	6 wpi only	G	X	NA	NA	NA	NA	NA	NA	NA	NA	NA	NA	NA	NA	Unknown	Unknown	OG0006779	7107	7044.56	9391.46	22167.7	16189.9	15670.9	731.114	1481.21	381.355	153.176	270.132	69.3102	1.41296	1	-2.74494	1	-5.12717	2.31e-07
Lacdel1|2508566	Lacdel1	2508566	gene_14263	Repressed during mycorrhization	4 and 6 wpi	E	X	NA	NA	NA	NA	NA	NA	NA	NA	NA	PF07653	SH3_2	NA	Other function	Holds a SH3 domain	OG0005031	12.9352	11.6643	12.4093	5.30659	4.30972	2.73409	0.047019	0.059587	0.389531	0.414215	0.345403	0.485664	-1.57953	1	-6.89763	0.00188087	-5.02835	0.003568
Lacdel1|2512774	Lacdel1	2512774	gene_565	Repressed during mycorrhization	4 wpi only	A	X	NA	NA	NA	NA	NA	NA	NA	NA	NA	PF01019	G_glu_transpept	Amino acid transport and metabolism	Protease	gamma-glutamyltransferase (T3)	OG0007333	34.9737	39.2045	35.9493	42.8912	37.4527	37.9498	5.40282	6.61253	4.51816	12.2042	11.9532	12.7837	0.242631	1	-2.57529	0.0258976	-1.2264	1
Lacdel1|2563845	Lacdel1	2563845	gene_1468	Repressed during mycorrhization	4 and 6 wpi	A	X	NA	NA	NA	NA	NA	NA	NA	NA	NA	PF16653,PF03435,PF01262,PF05222	Sacchrp_dh_C,Sacchrp_dh_NADP,AlaDh_PNT_C,AlaDh_PNT_N	Amino acid transport and metabolism	Other function	Saccharopine dehydrogenase	OG0004922	570.026	537.39	449.101	292.938	347.628	262.68	37.4001	51.1791	26.1692	23.6903	19.0684	15.9415	-0.619414	1	-3.34561	1.59e-07	-4.33762	2.63e-22
Lacdel1|2569557	Lacdel1	2569557	gene_4148	Repressed during mycorrhization	6 wpi only	A	X	Secreted	NA	AA5_1	PartialPCWdegradation	NA	NA	NA	NA	NA	PF07250,PF09118	Glyoxal_oxid_N,DUF1929	NA	CAZyme	Copper radical oxidase	OG0008398	355.525	260.177	241.948	123.001	146.712	132.958	39.3665	30.5995	27.2756	28.1439	40.9097	24.096	-0.935792	1	-2.70183	0.0620211	-2.81231	0.0150903
Lacdel1|2573731	Lacdel1	2573731	gene_15456	Repressed during mycorrhization	4 and 6 wpi	E	X	NA	NA	NA	NA	NA	NA	NA	NA	NA	PF00955	HCO3_cotransp	Inorganic ion transport and metabolism	Transporter/Permease	Bicarbonate transporter proteins	OG0000765	10.1791	7.78207	10.6278	2.67575	4.24723	4.41014	0.619806	0.75484	1.04663	1.17165	0.914286	0.945299	-1.12758	1	-3.15553	0.0497971	-3.17305	0.0492581
Lacdel1|2673412	Lacdel1	2673412	gene_4798	Repressed during mycorrhization	4 and 6 wpi	D	X	NA	NA	NA	NA	NA	NA	NA	NA	NA	NA	NA	NA	Unknown	Unknown	OG0000283	32.786	31.9244	29.571	30.9585	35.2008	27.2529	1.72392	1.85113	1.49155	2.15424	2.31232	3.73202	0.127257	1	-3.83064	6.73e-10	-3.07618	0.000105169
Lacdel1|354317	Lacdel1	354317	gene_7130	Repressed during mycorrhization	6 wpi only	D	X	NA	NA	NA	NA	NA	NA	NA	NA	NA	PF04193	PQ-loop	Function unknown	Transporter/Permease	Unknown transporter	OG0002489	22.0867	19.1298	18.6729	17.1454	21.7686	18.933	2.85964	1.29365	0.816534	1.07621	0.704745	0	0.0694699	1	-2.64185	0.149488	-3.32419	3.96e-05
Lacdel1|MSTRG.12189	Lacdel1	NA	MSTRG.12189	Repressed during mycorrhization	4 wpi only	E	NA	NA	NA	NA	NA	NA	NA	NA	NA	NA	NA	NA	NA	Unknown	Unknown	NA	4.34877	4.17536	4.6714	2.12791	3.41418	2.3445	0.384311	0.169911	0.156748	0.81144	0.776109	0.436593	-0.604692	1	-3.6605	0.00109097	-2.39905	1
Lacdel1|MSTRG.5512	Lacdel1	NA	MSTRG.5512	Repressed during mycorrhization	4 and 6 wpi	D	NA	NA	NA	NA	NA	NA	NA	NA	NA	NA	NA	NA	NA	Unknown	Unknown	NA	13.894	12.455	17.53	4.90785	6.08571	6.35441	1.07834	0.46348	0.935857	0.63348	0.927165	0.474599	-1.18619	1	-3.69707	6.37e-06	-3.99358	2.86e-07
Lacdel1|MSTRG.6600	Lacdel1	NA	MSTRG.6600	Repressed during mycorrhization	4 and 6 wpi	E	NA	NA	NA	NA	NA	NA	NA	NA	NA	NA	NA	NA	NA	Unknown	Unknown	NA	7.36735	6.501	8.57039	2.672	7.34685	6.99826	0.34828	0.137826	0.0875	0.191404	0.378922	0.174357	-0.262771	1	-5.04989	0.000296079	-4.35115	0.00161585

## Sheet: Sheet S4C-L.sanguifluus
Gene ID (this study)	JGI species ID	JGI protein ID	JGI gene ID	Gene regulation (genes are considered as differentially expressed if LFC > 2 or <-2 and p.value adjusted < 0.05)	Cluster in supplementary Figure S6	Secretion	Lipase	CAZyme family	CAZyme_substrate. PCW: Plant cell wall degrading enzyme.	Lectin	Subtilase family	Subtilase conservation. Subtilase missing one of their three catalytic regions were labelled as partial. If at least one of the catalytic region lack a perfect match to the pattern described in the litterature, the subtilase was labelled as containing a non-canonical region.	Enzyme Commission number	Enzyme Commission number description	PFAM domain ID	PFAM domain short description	KOG annotation	Highlighted functions	Highlighted functions additionnal details	Orthogroup ID	expression (TPM) in sample B21ct1 (FLM)	expression (TPM) in sample B21ct2 (FLM)	expression (TPM) in sample B21ct3 (FLM)	expression (TPM) in sample B21ps1 (mycorrhiza)	expression (TPM) in sample B21ps2 (mycorrhiza)	expression (TPM) in sample B21ps3 (mycorrhiza)	log2FoldChange (LFC) between FLM and mycorrhiza	adjusted p.value
Lacsan1|1037822	Lacsan1	1037822	gene_8798	Repressed during mycorrhization	VIII	NA	NA	NA	NA	NA	NA	NA	NA	NA	PF04082,PF00172	Fungal_trans,Zn_clus	NA	Transcription factor	Fungal specific transcription factor domain	OG0001584	61.2233	76.6758	56.6514	8.53727	7.52188	8.96043	-2.69496	0.0289719
Lacsan1|111108	Lacsan1	111108	gene_11103	Repressed during mycorrhization	VIII	NA	NA	NA	NA	NA	NA	NA	NA	NA	NA	NA	NA	Unknown	Unknown	OG0005645	515.039	748.134	622.375	62.7589	97.226	89.2884	-2.8139	0.00844125
Lacsan1|1596465	Lacsan1	1596465	gene_3335	Repressed during mycorrhization	VIII	SSP	NA	NA	NA	NA	NA	NA	NA	NA	NA	NA	NA	Unknown	Unknown	OG0002209	513.934	497.143	504.126	23.0625	35.5827	24.9591	-5.45358	8.05e-47
Lacsan1|1817277	Lacsan1	1817277	gene_594	Repressed during mycorrhization	VIII	NA	NA	NA	NA	NA	NA	NA	NA	NA	PF01285	TEA	NA	Transcription factor	Holds a TEA domain	OG0005026	593.5	909.594	599.306	58.1318	69.7406	70.1087	-3.1129	3.29e-05
Lacsan1|1831240	Lacsan1	1831240	gene_12961	Repressed during mycorrhization	VIII	NA	NA	NA	NA	NA	NA	NA	NA	NA	PF07653	SH3_2	NA	Other function	Holds a SH3 domain	OG0005031	29.5998	23.7363	16.2127	0	0	1.10666	-3.95739	0.00081629
Lacsan1|1850937	Lacsan1	1850937	gene_8646	Repressed during mycorrhization	VIII	NA	NA	NA	NA	NA	NA	NA	NA	NA	PF07690	MFS_1	NA	Transporter/Permease	Unknown transporter	OG0006837	28.0949	25.1577	31.4682	4.24709	3.02015	3.74339	-2.77797	0.0266529
Lacsan1|1857158	Lacsan1	1857158	gene_13203	Repressed during mycorrhization	VIII	NA	71423796|GX|abH23	NA	NA	NA	NA	NA	3.1.1.3	Triacylglycerol lipase.	PF01764	Lipase_3	Lipid transport and metabolism	Lipase	Triacylglycerol lipase.	OG0002795	529.328	366.206	434.134	4.66939	5.39329	3.74353	-6.57037	2.98e-85
Lacsan1|1861295	Lacsan1	1861295	gene_21585	Repressed during mycorrhization	VIII	NA	NA	NA	NA	NA	NA	NA	NA	NA	PF00091,PF03953	Tubulin,Tubulin_C	Cytoskeleton	Other function	Tubulin	OG0002235	109.801	107.596	101.214	15.8591	10.0916	11.3671	-2.80409	0.0101303
Lacsan1|1878200	Lacsan1	1878200	gene_1810	Repressed during mycorrhization	VIII	NA	NA	NA	NA	NA	NA	NA	1.3.1.33	Protochlorophyllide reductase.	PF00106,PF13561,PF08659,PF01370,PF16363	adh_short,adh_short_C2,KR,Epimerase,GDP_Man_Dehyd	Secondary metabolites biosynthesis, transport and catabolism	Other function	Protochlorophyllide reductase.	OG0000400	253.787	223.086	252.259	15.514	20.1759	32.037	-3.33408	4.39e-06
Lacsan1|1891290	Lacsan1	1891290	gene_13419	Repressed during mycorrhization	VIII	NA	NA	NA	NA	NA	NA	NA	1.3.1.33	Protochlorophyllide reductase.	PF00106,PF13561,PF08659,PF01370,PF16363	adh_short,adh_short_C2,KR,Epimerase,GDP_Man_Dehyd	Secondary metabolites biosynthesis, transport and catabolism	Other function	Protochlorophyllide reductase.	OG0000400	261.117	276.48	300.321	7.62369	11.2146	8.73099	-4.7588	2.03e-40
Lacsan1|1904862	Lacsan1	1904862	gene_7292	Repressed during mycorrhization	VIII	NA	NA	NA	NA	NA	NA	NA	NA	NA	NA	NA	NA	Unknown	Unknown	OG0001459	121.511	138.798	91.878	10.7067	5.95421	12.1501	-3.39681	5.19e-05
Lacsan1|1918586	Lacsan1	1918586	gene_144	Repressed during mycorrhization	VIII	NA	NA	NA	NA	NA	NA	NA	1.3.1.9	Enoyl-[acyl-carrier protein] reductase (NADH).	PF03060,PF00478	NMO,IMPDH	NA	Other function	Nitronate monooxigenase	OG0008863	27.626	35.5277	25.5768	3.76935	4.2625	3.19913	-3.04648	8.57e-05
Lacsan1|1922030	Lacsan1	1922030	gene_791	Repressed during mycorrhization	VIII	NA	NA	NA	NA	NA	NA	NA	NA	NA	PF09011,PF00505	HMG_box_2,HMG_box	General function prediction only	Transcription factor	Holds a HMG domain	OG0005576	1023.52	830.593	591.388	43.2227	87.7966	99.776	-2.98565	0.00128656
Lacsan1|1941764	Lacsan1	1941764	gene_6062	Repressed during mycorrhization	VIII	NA	NA	NA	NA	NA	NA	NA	NA	NA	NA	NA	NA	Unknown	Unknown	OG0004612	1184.24	996.639	1173.12	146.748	132.053	100.075	-3.12706	1.66e-05
Lacsan1|1969392	Lacsan1	1969392	gene_7528	Repressed during mycorrhization	VIII	NA	NA	NA	NA	NA	NA	NA	3.6.3.44	Xenobiotic-transporting ATPase.	PF00664,PF00005,PF02463,PF01695,PF13191,PF13555,PF13401,PF13304,PF01935,PF09818,PF03193,PF13671	ABC_membrane,ABC_tran,SMC_N,IstB_IS21,AAA_16,AAA_29,AAA_22,AAA_21,DUF87,ABC_ATPase,RsgA_GTPase,AAA_33	Secondary metabolites biosynthesis, transport and catabolism	Transporter/Permease	Xenobiotic-transporting ATPase.	OG0001135	354.568	279.158	232.338	38.7788	44.8415	40.7407	-2.73162	0.00695162
Lacsan1|2008943	Lacsan1	2008943	gene_15182	Repressed during mycorrhization	VIII	NA	NA	NA	NA	NA	NA	NA	NA	NA	NA	NA	NA	Unknown	Unknown	OG0000242	49.5017	49.4245	58.0388	3.85194	1.36183	1.79496	-4.35434	1.28e-10
Lacsan1|2064552	Lacsan1	2064552	gene_2314	Repressed during mycorrhization	VIII	Secreted	NA	NA	NA	NA	NA	NA	3.4.16.6	Carboxypeptidase D.	PF00450	Peptidase_S10	Amino acid transport and metabolism ; Posttranslational modification, protein turnover, chaperones	Protease	Carboxypeptidase (S10)	OG0007715	68.9265	63.6556	57.1922	8.06057	6.88789	8.12768	-2.89041	4.05e-05
Lacsan1|2081739	Lacsan1	2081739	gene_21060	Repressed during mycorrhization	VIII	NA	NA	NA	NA	NA	NA	NA	2.1.1.100	Protein-S isoprenylcysteine O-methyltransferase.	PF04140,PF04191	ICMT,PEMT	NA	Other function	Isoprenylcysteine O-methyltransferase.	OG0007522	20.0206	41.495	25.2348	3.8508	1.65321	2.27925	-3.57257	0.00651242
Lacsan1|2093767	Lacsan1	2093767	gene_4972	Repressed during mycorrhization	VIII	NA	NA	NA	NA	NA	NA	NA	NA	NA	PF00011	HSP20	Posttranslational modification, protein turnover, chaperones	Other function	heat shock protein Hsp20 / chaperones	OG0004786	390.324	364.889	228.061	37.2921	45.9212	31.6996	-2.88376	0.00581627
Lacsan1|2110654	Lacsan1	2110654	gene_384	Repressed during mycorrhization	VIII	NA	NA	NA	NA	NA	NA	NA	NA	NA	PF00806	PUF	Translation, ribosomal structure and biogenesis	Other function	PUF	OG0007211	90.7414	92.5917	60.3294	1.36909	3.62966	0.523189	-4.75243	1.27e-26
Lacsan1|2113306	Lacsan1	2113306	gene_6740	Repressed during mycorrhization	VIII	Secreted	NA	GH16	Glucan	NA	NA	NA	NA	NA	NA	NA	NA	CAZyme	Glycoside Hydrolase	OG0005625	120.672	71.5956	60.8923	0.218212	1.3685	1.84323	-5.20914	6.53e-18
Lacsan1|2114795	Lacsan1	2114795	gene_8092	Repressed during mycorrhization	VIII	Secreted	NA	GH5_9	Glucan	NA	NA	NA	3.2.1.58	Glucan 1,3-beta-glucosidase.	PF00150	Cellulase	NA	CAZyme	Glycoside Hydrolase	OG0008052	63.4427	38.4109	44.5002	1.62311	2.9943	4.84854	-3.61063	8.02e-08
Lacsan1|2115775	Lacsan1	2115775	gene_13202	Repressed during mycorrhization	VIII	NA	NA	NA	NA	NA	NA	NA	NA	NA	PF01764	Lipase_3	Lipid transport and metabolism	Lipase	Unknown lipase	OG0002795	23.8036	17.3324	22.2814	0.54912	0.373006	0	-5.57774	2.44e-08
Lacsan1|2125188	Lacsan1	2125188	gene_12159	Repressed during mycorrhization	VIII	NA	NA	NA	NA	NA	NA	NA	NA	NA	PF00324,PF13520	AA_permease,AA_permease_2	Amino acid transport and metabolism	Transporter/Permease	Amino acid permease	OG0007244	407.988	371.257	252.576	39.5943	47.2429	39.01	-2.95212	0.000679054
Lacsan1|2133819	Lacsan1	2133819	gene_15393	Repressed during mycorrhization	VIII	NA	NA	NA	NA	NA	NA	NA	NA	NA	PF00505,PF09011	HMG_box,HMG_box_2	Transcription	Transcription factor	Holds a HMG domain	OG0008568	1855.96	1608.17	1117.37	168.831	178.101	219.45	-2.85544	0.0125758
Lacsan1|2166394	Lacsan1	2166394	gene_9243	Repressed during mycorrhization	VIII	NA	NA	NA	NA	NA	NA	NA	NA	NA	PF13632	Glyco_trans_2_3	NA	Unknown	Unknown	OG0001405	257.063	292.618	182.713	8.26597	9.09083	13.9565	-4.56551	5.24e-17
Lacsan1|2172051	Lacsan1	2172051	gene_1740	Repressed during mycorrhization	VIII	NA	NA	NA	NA	NA	NA	NA	NA	NA	PF03169	OPT	Signal transduction mechanisms	Transporter/Permease	oligopeptide transporter	OG0006366	1702.08	1492.59	1028.95	168.051	159.975	190.254	-2.95263	0.00231869
Lacsan1|2228097	Lacsan1	2228097	gene_6344	Repressed during mycorrhization	VIII	NA	NA	NA	NA	NA	NA	NA	NA	NA	PF17168,PF16335,PF08760	DUF5127,DUF4965,DUF1793	NA	Unknown	Unknown	OG0007539	44.9895	40.7426	41.8125	4.11691	4.05228	4.10206	-3.04135	2.9e-08
Lacsan1|270262	Lacsan1	270262	gene_15877	Repressed during mycorrhization	VIII	SSP	NA	EXPN	NA	NA	NA	NA	NA	NA	PF07249	Cerato-platanin	NA	CAZyme	Distantly related to plant expansins	OG0002944	228.542	109.474	39.9508	2.91055	3.32241	2.46837	-5.26485	0.000251143
Lacsan1|819878	Lacsan1	819878	gene_7813	Repressed during mycorrhization	VIII	NA	NA	NA	NA	NA	NA	NA	NA	NA	NA	NA	NA	Unknown	Unknown	OG0000283	144.023	167.928	105.174	11.9864	13.2615	8.11939	-3.51808	6.17e-08
Lacsan1|MSTRG.10466	Lacsan1	NA	MSTRG.10466	Repressed during mycorrhization	VIII	NA	NA	NA	NA	NA	NA	NA	NA	NA	PF16653	Sacchrp_dh_C	NA	Other function	Saccharopine dehydrogenase	OG0013035	421.51	393.916	375.831	41.8353	44.9886	13.356	-3.51254	0.00101095
Lacsan1|MSTRG.12787	Lacsan1	NA	MSTRG.12787	Repressed during mycorrhization	VIII	NA	NA	NA	NA	NA	NA	NA	NA	NA	PF03357	Snf7	NA	Other function	Snf7-like	OG0018214	66.6853	68.2525	62.4925	6.33889	6.2988	5.15958	-4.11798	4.72e-16
Lacsan1|MSTRG.305	Lacsan1	NA	MSTRG.305	Repressed during mycorrhization	VIII	NA	NA	NA	NA	NA	NA	NA	NA	NA	PF05129	Elf1	NA	Other function	Transcription elongation factor	OG0003012	89.9019	93.3097	77.5811	48.737	24.4982	60.5978	-4.54469	5.84e-28
Lacsan1|1233660	Lacsan1	1233660	gene_9019	Repressed during mycorrhization	IX	NA	NA	NA	NA	NA	NA	NA	NA	NA	NA	NA	NA	Unknown	Unknown	OG0004497	25.6855	17.576	20.4813	0.528109	1.80542	0.682789	-3.85674	6.17e-08
Lacsan1|1276393	Lacsan1	1276393	gene_8147	Repressed during mycorrhization	IX	NA	NA	NA	NA	NA	NA	NA	NA	NA	PF12937	F-box-like	NA	Other function	Holds a F-box domain	OG0001751	62.0276	64.4305	54.9811	5.04098	6.20388	6.2733	-3.10385	3.58e-06
Lacsan1|1294441	Lacsan1	1294441	gene_4537	Repressed during mycorrhization	IX	NA	NA	NA	NA	NA	NA	NA	NA	NA	NA	NA	NA	Unknown	Unknown	OG0007979	186.336	220.722	158.537	9.16911	11.6484	10.0791	-4.19558	6.46e-26
Lacsan1|1297771	Lacsan1	1297771	gene_4605	Repressed during mycorrhization	IX	NA	NA	NA	NA	NA	NA	NA	NA	NA	NA	NA	NA	Unknown	Unknown	OG0008504	2447.71	2128.99	1917.57	161.628	130.355	135.127	-3.75937	6.84e-23
Lacsan1|1634918	Lacsan1	1634918	gene_12477	Repressed during mycorrhization	IX	NA	NA	NA	NA	NA	NA	NA	NA	NA	NA	NA	NA	Unknown	Unknown	OG0000580	36.7915	18.5808	40.4391	4.14638	3.13542	2.84442	-3.81271	2.45e-05
Lacsan1|168645	Lacsan1	168645	gene_10876	Repressed during mycorrhization	IX	NA	NA	NA	NA	NA	NA	NA	NA	NA	NA	NA	NA	Unknown	Unknown	OG0008882	268.928	389.704	216.771	30.313	31.2843	32.4913	-2.98254	0.000888869
Lacsan1|1907640	Lacsan1	1907640	gene_8045	Repressed during mycorrhization	IX	NA	NA	NA	NA	NA	NA	NA	NA	NA	NA	NA	NA	Unknown	Unknown	OG0008794	418.332	290.316	378.255	21.3228	30.2702	14.0461	-3.7341	1.49e-09
Lacsan1|1922790	Lacsan1	1922790	gene_942	Repressed during mycorrhization	IX	NA	NA	NA	NA	NA	NA	NA	NA	NA	NA	NA	NA	Unknown	Unknown	OG0007633	913.267	861.139	871.489	106.329	84.4532	78.5484	-3.12939	7.77e-11
Lacsan1|1969471	Lacsan1	1969471	gene_7538	Repressed during mycorrhization	IX	NA	NA	NA	NA	24c1__3QDY Fungal fruit body lectin	NA	NA	NA	NA	PF07367	FB_lectin	NA	Lectin	Fungal fruit body lectin	OG0000849	406.306	570.45	219.523	28.3496	26.6553	28.2747	-3.13463	0.026099
Lacsan1|1970590	Lacsan1	1970590	gene_10083	Repressed during mycorrhization	IX	NA	NA	NA	NA	NA	NA	NA	NA	NA	NA	NA	NA	Unknown	Unknown	OG0004235	658.221	612.561	432.834	77.5095	57.2832	92.8562	-2.88636	0.0283097
Lacsan1|2014178	Lacsan1	2014178	gene_15464	Repressed during mycorrhization	IX	NA	NA	NA	NA	NA	NA	NA	NA	NA	PF04749	PLAC8	NA	Other function	PLAC8	OG0002359	124.971	93.7987	32.992	0.469348	1.66846	0.665362	-6.03219	4.64e-07
Lacsan1|2068149	Lacsan1	2068149	gene_7297	Repressed during mycorrhization	IX	NA	NA	NA	NA	NA	NA	NA	NA	NA	NA	NA	NA	Unknown	Unknown	OG0017605	69.8019	64.5116	62.9565	0	2.6955	5.7874	-3.82158	0.0098089
Lacsan1|2072982	Lacsan1	2072982	gene_10771	Repressed during mycorrhization	IX	SSP	NA	NA	NA	NA	NA	NA	NA	NA	NA	NA	NA	Unknown	Unknown	OG0003784	1392.44	1214.9	886.153	108.656	187.353	123.221	-2.88207	0.000521393
Lacsan1|2073070	Lacsan1	2073070	gene_10032	Repressed during mycorrhization	IX	NA	NA	NA	NA	NA	NA	NA	NA	NA	PF12223	DUF3602	NA	Unknown	Unknown	OG0004058	843.196	674.398	559.575	63.6246	25.0205	66.3414	-3.44069	0.00576338
Lacsan1|2077423	Lacsan1	2077423	gene_15468	Repressed during mycorrhization	IX	NA	NA	NA	NA	NA	NA	NA	NA	NA	PF04749	PLAC8	NA	Other function	PLAC8	OG0000497	317.259	288.527	243.127	20.5644	7.69927	17.064	-3.85858	8.13e-16
Lacsan1|2114126	Lacsan1	2114126	gene_8649	Repressed during mycorrhization	IX	NA	NA	NA	NA	NA	NA	NA	NA	NA	NA	NA	NA	Unknown	Unknown	OG0002794	68.7524	73.4626	70.1312	11.8198	8.60688	9.71175	-2.7535	0.00669313
Lacsan1|2161046	Lacsan1	2161046	gene_2162	Repressed during mycorrhization	IX	NA	NA	NA	NA	NA	NA	NA	NA	NA	PF00642,PF16131	zf-CCCH,Torus	NA	Transcription factor	pre-mRNA-splicing factor CWC3	OG0007657	118.402	169.229	132.59	21.329	15.4867	23.0843	-3.03823	0.00576038
Lacsan1|347779	Lacsan1	347779	gene_3907	Repressed during mycorrhization	IX	NA	NA	NA	NA	NA	NA	NA	NA	NA	PF12223	DUF3602	NA	Unknown	Unknown	OG0009277	243.464	204.44	180.609	6.37903	3.12416	4.87628	-5.33645	3.36e-27
Lacsan1|402599	Lacsan1	402599	gene_17095	Repressed during mycorrhization	IX	NA	NA	NA	NA	NA	NA	NA	NA	NA	NA	NA	NA	Unknown	Unknown	OG0011808	5.89463	4.93538	4.52701	2.08024	0.330167	2.54533	-4.01	2.52e-05
Lacsan1|569248	Lacsan1	569248	gene_5405	Repressed during mycorrhization	IX	NA	NA	NA	NA	NA	NA	NA	NA	NA	NA	NA	NA	Unknown	Unknown	OG0004076	88.1491	81.75	67.0048	10.0694	8.01927	9.61165	-2.8516	0.000693817
Lacsan1|642660	Lacsan1	642660	gene_7296	Repressed during mycorrhization	IX	NA	NA	NA	NA	NA	NA	NA	NA	NA	NA	NA	NA	Unknown	Unknown	OG0009490	29.1791	31.7519	27.8867	2.23563	0.697896	2.25458	-4.21971	2.41e-09
Lacsan1|MSTRG.10300	Lacsan1	NA	MSTRG.10300	Repressed during mycorrhization	IX	NA	NA	NA	NA	NA	NA	NA	NA	NA	NA	NA	NA	Unknown	Unknown	OG0004159	57.9965	54.4871	43.9229	6.29945	5.29462	7.09687	-2.80629	0.00443569
Lacsan1|MSTRG.8579	Lacsan1	NA	MSTRG.8579	Repressed during mycorrhization	IX	NA	NA	NA	NA	NA	NA	NA	NA	NA	NA	NA	NA	Unknown	Unknown	OG0002941	20.4646	14.7414	16.9029	1.29453	1.53157	2.82878	-3.23655	0.00549692
Lacsan1|MSTRG.9096	Lacsan1	NA	MSTRG.9096	Repressed during mycorrhization	IX	NA	NA	NA	NA	NA	NA	NA	NA	NA	NA	NA	NA	Unknown	Unknown	OG0002359	117.117	103.648	95.703	8.67127	7.23053	8.19023	-3.59855	3.79e-16
Lacsan1|1903819	Lacsan1	1903819	gene_3918	Repressed during mycorrhization	X	NA	NA	NA	NA	NA	NA	NA	NA	NA	PF12223	DUF3602	NA	Unknown	Unknown	OG0009277	715.845	600.534	596.206	65.4656	33.901	27.3622	-3.63763	7.27e-07
Lacsan1|1908227	Lacsan1	1908227	gene_8851	Repressed during mycorrhization	X	NA	NA	NA	NA	NA	NA	NA	NA	NA	PF01753	zf-MYND	Chromatin structure and dynamics	Transcription factor	Holds a zinc finger domain	OG0000313	28.532	21.057	29.371	1.37114	1.94518	1.33616	-4.18046	0.000181504
Lacsan1|1964218	Lacsan1	1964218	gene_8653	Repressed during mycorrhization	X	NA	NA	NA	NA	NA	NA	NA	NA	NA	NA	NA	NA	Unknown	Unknown	OG0010602	48.3494	38.7299	41.9907	3.85229	3.62222	7.28216	-3.19844	0.000105336
Lacsan1|2077425	Lacsan1	2077425	gene_15471	Repressed during mycorrhization	X	NA	NA	NA	NA	NA	NA	NA	NA	NA	NA	NA	NA	Unknown	Unknown	OG0017681	111.46	102.36	58.6814	7.79686	9.98344	10.3107	-3.65501	0.000150701
Lacsan1|2079931	Lacsan1	2079931	gene_18306	Repressed during mycorrhization	X	NA	NA	NA	NA	NA	NA	NA	NA	NA	NA	NA	NA	Unknown	Unknown	OG0011123	682.988	719.383	877.62	56.7744	33.0574	71.4896	-3.8027	5.66e-08
Lacsan1|2229893	Lacsan1	2229893	gene_10084	Repressed during mycorrhization	X	NA	NA	NA	NA	NA	NA	NA	NA	NA	NA	NA	NA	Unknown	Unknown	OG0001281	15.4093	11.8071	13.2726	1.72718	0.274488	0.955321	-4.24168	7.37e-06
Lacsan1|254535	Lacsan1	254535	gene_11967	Repressed during mycorrhization	X	NA	NA	NA	NA	NA	NA	NA	NA	NA	PF00271,PF00270	Helicase_C,DEAD	Replication, recombination and repair	Other function	Helicase	OG0002387	19.3714	25.1383	16.4487	1.86869	2.66816	2.17215	-3.18983	0.00233603
Lacsan1|425341	Lacsan1	425341	gene_4757	Repressed during mycorrhization	X	SSP	NA	NA	NA	NA	NA	NA	NA	NA	NA	NA	NA	Unknown	Unknown	OG0010167	726.202	584.082	477.4	45.5267	48.8737	57.1052	-3.48958	5.11e-11
Lacsan1|602538	Lacsan1	602538	gene_6954	Repressed during mycorrhization	X	SSP	NA	NA	NA	NA	NA	NA	NA	NA	NA	NA	NA	Unknown	Unknown	OG0001693	561.317	351.92	183.38	16.5785	11.385	12.7757	-4.9411	4.43e-15
Lacsan1|646711	Lacsan1	646711	gene_7361	Repressed during mycorrhization	X	NA	NA	NA	NA	NA	NA	NA	NA	NA	NA	NA	NA	Unknown	Unknown	OG0007003	13.5503	13.5248	12.8656	0.201648	0.823448	1.30197	-3.85677	0.00509563
Lacsan1|MSTRG.13329	Lacsan1	NA	MSTRG.13329	Repressed during mycorrhization	X	NA	NA	NA	NA	NA	NA	NA	NA	NA	NA	NA	NA	Unknown	Unknown	OG0018234	132.037	146.517	100.559	16.0115	12.8771	13.401	-2.97284	0.0207564
Lacsan1|MSTRG.2611	Lacsan1	NA	MSTRG.2611	Repressed during mycorrhization	X	NA	NA	NA	NA	NA	NA	NA	NA	NA	NA	NA	NA	Unknown	Unknown	OG0010716	47.8501	47.6183	31.2849	4.15236	3.1451	4.98362	-3.12915	0.00562148
Lacsan1|MSTRG.10476	Lacsan1	NA	MSTRG.10476	Repressed during mycorrhization	NA	NA	NA	NA	NA	NA	NA	NA	NA	NA	NA	NA	NA	Unknown	Unknown	NA	29.3441	32.7504	23.2637	4.46315	1.229	1.39061	-3.2986	0.0276378
Lacsan1|MSTRG.10648	Lacsan1	NA	MSTRG.10648	Repressed during mycorrhization	NA	NA	NA	NA	NA	NA	NA	NA	NA	NA	NA	NA	NA	Unknown	Unknown	NA	44.1808	33.5212	24.9457	4.259	3.72034	2.78104	-3.03672	0.00863106
Lacsan1|MSTRG.11438	Lacsan1	NA	MSTRG.11438	Repressed during mycorrhization	NA	NA	NA	NA	NA	NA	NA	NA	NA	NA	NA	NA	NA	Unknown	Unknown	NA	12.779	9.9285	9.21395	1.20885	0.671521	0.977489	-3.26086	0.027557
Lacsan1|MSTRG.8713	Lacsan1	NA	MSTRG.8713	Repressed during mycorrhization	NA	NA	NA	NA	NA	NA	NA	NA	NA	NA	NA	NA	NA	Unknown	Unknown	NA	19.5018	11.7078	18.5325	0.2137	0.81863	0.764627	-4.58106	1.34e-07

## Sheet: Sheet S4D-L.vividus
Gene ID (this study)	JGI species ID	JGI protein ID	JGI gene ID	Gene regulation (genes are considered as differentially expressed if LFC > 2 or <-2 and p.value adjusted < 0.05)	Cluster in supplementary Figure S7	Secretion	Lipase	CAZyme family	CAZyme_substrate. PCW: Plant cell wall degrading enzyme.	Lectin	Subtilase family	Subtilase conservation. Subtilase missing one of their three catalytic regions were labelled as partial. If at least one of the catalytic region lack a perfect match to the pattern described in the litterature, the subtilase was labelled as containing a non-canonical region.	Enzyme Commission number	Enzyme Commission number description	PFAM domain ID	PFAM domain short description	KOG annotation	Highlighted functions	Highlighted functions additionnal details	Orthogroup ID	expression (TPM) in sample 141ct1 (FLM)	expression (TPM) in sample 141ct2 (FLM)	expression (TPM) in sample 141ct3 (FLM)	expression (TPM) in sample 141pt1 (mycorrhiza)	expression (TPM) in sample 141pt2 (mycorrhiza)	expression (TPM) in sample 141pt3 (mycorrhiza)	log2FoldChange (LFC) between FLM and mycorrhiza	adjusted p.value
Lacviv1|1012435	Lacviv1	1012435	gene_6891	Repressed during mycorrhization	VIII	SSP	NA	EXPN	NA	NA	NA	NA	NA	NA	PF07249	Cerato-platanin	NA	CAZyme	Distantly related to plant expansins	OG0001120	968.188	1013.81	1034.74	5.39183	3.40409	4.82574	-7.4367	6.79e-113
Lacviv1|1016019	Lacviv1	1016019	gene_9915	Repressed during mycorrhization	VIII	NA	NA	NA	NA	NA	NA	NA	1.14.13.12	Benzoate 4-monooxygenase.	PF00067	p450	Secondary metabolites biosynthesis, transport and catabolism	Cytochrome p450		OG0000737	210.848	226.251	194.742	29.9918	34.7723	36.7857	-2.59586	0.0028875
Lacviv1|1067076	Lacviv1	1067076	gene_1992	Repressed during mycorrhization	VIII	NA	NA	NA	NA	NA	NA	NA	NA	NA	PF00011	HSP20	Posttranslational modification, protein turnover, chaperones	Other function	heat shock protein Hsp20 / chaperones	OG0004694	166.517	58.467	2.10058	35.1586	41.7741	0.90116	-2.45264	0.0330357
Lacviv1|1243002	Lacviv1	1243002	gene_4088	Repressed during mycorrhization	VIII	NA	NA	NA	NA	NA	NA	NA	NA	NA	PF16908	VPS13	NA	Other function	Vacuolar sorting-associated protein	OG0004653	53.6027	57.4433	50.7114	5.01846	7.89738	8.33187	-2.78307	0.00778839
Lacviv1|1291767	Lacviv1	1291767	gene_7798	Repressed during mycorrhization	VIII	NA	NA	NA	NA	NA	NA	NA	NA	NA	PF00011	HSP20	Posttranslational modification, protein turnover, chaperones	Other function	heat shock protein Hsp20 / chaperones	OG0004786	58.3424	66.9945	75.1804	8.56999	8.0618	3.7029	-2.75802	0.0216443
Lacviv1|1318480	Lacviv1	1318480	gene_5508	Repressed during mycorrhization	VIII	NA	NA	NA	NA	NA	NA	NA	NA	NA	NA	NA	NA	Unknown	Unknown	OG0002078	34.1485	35.1778	40.6775	3.50735	5.12003	4.3999	-2.89779	5.43e-05
Lacviv1|1319679	Lacviv1	1319679	gene_5517	Repressed during mycorrhization	VIII	NA	NA	NA	NA	NA	NA	NA	NA	NA	NA	NA	NA	Unknown	Unknown	OG0004612	220.859	206.122	229.247	15.9672	24.0511	17.592	-3.6048	9.53e-23
Lacviv1|1374111	Lacviv1	1374111	gene_2187	Repressed during mycorrhization	VIII	NA	NA	NA	NA	NA	NA	NA	NA	NA	PF13639	zf-RING_2	NA	Transcription factor	Holds a zinc finger domain	OG0004869	36.4338	63.1037	69.8033	53.0906	44.6327	4.05128	-2.73993	0.00610602
Lacviv1|1409182	Lacviv1	1409182	gene_10233	Repressed during mycorrhization	VIII	NA	NA	NA	NA	NA	NA	NA	NA	NA	PF01040	UbiA	NA	Other function	Holds a UbiA domain	OG0008338	771.713	833.743	813.284	134.744	145.953	129.776	-2.41273	0.0481652
Lacviv1|1537917	Lacviv1	1537917	gene_10986	Repressed during mycorrhization	VIII	NA	NA	NA	NA	NA	NA	NA	NA	NA	NA	NA	NA	Unknown	Unknown	OG0009169	32.298	32.6609	35.0627	0.998056	3.06302	3.6787	-3.47737	0.00086704
Lacviv1|1540573	Lacviv1	1540573	gene_8118	Repressed during mycorrhization	VIII	NA	NA	NA	NA	NA	NA	NA	NA	NA	PF01613	Flavin_Reduct	NA	Other function	Flavin reductase	OG0006598	189.098	183.451	171.023	19.254	27.3112	27.674	-3.06972	2.27e-08
Lacviv1|1552902	Lacviv1	1552902	gene_199	Repressed during mycorrhization	VIII	NA	NA	NA	NA	NA	NA	NA	NA	NA	PF00651	BTB	NA	Transcription factor	Holds a BTB domain	OG0000968	25.3558	20.8246	14.6464	0.553471	0.962939	0.909742	-4.36298	6.86e-10
Lacviv1|1564358	Lacviv1	1564358	gene_6705	Repressed during mycorrhization	VIII	NA	NA	NA	NA	NA	NA	NA	NA	NA	PF00067	p450	Secondary metabolites biosynthesis, transport and catabolism	Cytochrome p450		OG0000551	49.3103	49.2036	48.2396	3.99861	5.19537	6.15247	-3.0666	8.01e-09
Lacviv1|1630037	Lacviv1	1630037	gene_6887	Repressed during mycorrhization	VIII	SSP	NA	EXPN	NA	NA	NA	NA	NA	NA	PF07249	Cerato-platanin	NA	CAZyme	Distantly related to plant expansins	OG0000403	386.956	421.835	416.119	2.97153	2.8757	3.51077	-6.30009	6.04e-46
Lacviv1|1632835	Lacviv1	1632835	gene_8654	Repressed during mycorrhization	VIII	NA	NA	GT8	NA	NA	NA	NA	2.4.1.186	Glycogenin glucosyltransferase.	PF01501	Glyco_transf_8	Carbohydrate transport and metabolism	CAZyme	Glycosyltransferase	OG0000479	316.422	287.042	285.326	25.3054	30.4539	14.3052	-3.6128	6.31e-09
Lacviv1|1636573	Lacviv1	1636573	gene_8058	Repressed during mycorrhization	VIII	NA	NA	NA	NA	NA	NA	NA	NA	NA	PF07690	MFS_1	General function prediction only	Transporter/Permease	Unknown transporter	OG0000238	574.254	592.323	615.268	34.583	55.9266	34.5416	-3.58933	1.01e-09
Lacviv1|1644067	Lacviv1	1644067	gene_9518	Repressed during mycorrhization	VIII	NA	NA	NA	NA	NA	NA	NA	NA	NA	PF08031	BBE	NA	Other function	Holds a BBE domain	OG0018910	40.9962	51.2407	47.1548	8.54713	11.8645	11.0386	-2.67482	0.00251131
Lacviv1|1660903	Lacviv1	1660903	gene_11119	Repressed during mycorrhization	VIII	NA	NA	NA	NA	NA	NA	NA	NA	NA	NA	NA	NA	Unknown	Unknown	OG0006743	76.7615	87.6575	81.1199	9.42756	5.97368	5.87048	-3.23126	3.01e-07
Lacviv1|1675215	Lacviv1	1675215	gene_7452	Repressed during mycorrhization	VIII	NA	NA	NA	NA	NA	NA	NA	NA	NA	PF04193	PQ-loop	Function unknown	Transporter/Permease	Unknown transporter	OG0002489	14.2856	13.2298	11.9913	0.656017	1.83855	2.51452	-3.42916	0.00192836
Lacviv1|1676425	Lacviv1	1676425	gene_9506	Repressed during mycorrhization	VIII	NA	NA	NA	NA	NA	NA	NA	4.2.1.1	Carbonate dehydratase.	PF00484	Pro_CA	Inorganic ion transport and metabolism	Other function	Carbonate dehydratase.	OG0000381	4810.06	4676.65	4062.51	474.759	565.022	437.978	-3.16628	9.63e-13
Lacviv1|1676544	Lacviv1	1676544	gene_10205	Repressed during mycorrhization	VIII	NA	NA	NA	NA	NA	NA	NA	NA	NA	NA	NA	General function prediction only	Unknown	Unknown	OG0001585	52.4933	53.4737	48.1992	6.57762	7.49981	5.43641	-2.94624	1.11e-05
Lacviv1|1682366	Lacviv1	1682366	gene_3192	Repressed during mycorrhization	VIII	NA	NA	NA	NA	NA	NA	NA	NA	NA	NA	NA	NA	Unknown	Unknown	OG0006194	222.909	267.983	259.117	9.34394	17.0672	13.8803	-4.17256	3.05e-17
Lacviv1|1682953	Lacviv1	1682953	gene_3683	Repressed during mycorrhization	VIII	NA	NA	NA	NA	NA	NA	NA	NA	NA	PF05368,PF13460	NmrA,NAD_binding_10	NA	Other function	Putative transcription factor	OG0005365	645.754	603.58	713.515	106.871	87.0863	58.6778	-2.89249	0.000438666
Lacviv1|1683932	Lacviv1	1683932	gene_6388	Repressed during mycorrhization	VIII	Secreted	CAH17527|GGGX|abH03	NA	NA	NA	NA	NA	3.1.1.3	Triacylglycerol lipase.	PF00135	COesterase	Signal transduction mechanisms	Lipase	Triacylglycerol lipase.	OG0008178	53.1177	50.3297	45.6985	2.22686	1.82171	2.41155	-4.6915	9.88e-37
Lacviv1|1686009	Lacviv1	1686009	gene_6880	Repressed during mycorrhization	VIII	NA	NA	NA	NA	NA	NA	NA	NA	NA	PF04479	RTA1	NA	Other function	RTA2	OG0002622	69.9363	76.645	91.585	8.35472	4.37661	5.70241	-3.89453	1.47e-20
Lacviv1|1689304	Lacviv1	1689304	gene_10192	Repressed during mycorrhization	VIII	NA	NA	NA	NA	NA	NA	NA	NA	NA	PF00005	ABC_tran	Secondary metabolites biosynthesis, transport and catabolism	Transporter/Permease	Unknown transporter	OG0004513	16.9346	17.435	16.2307	2.21655	2.54666	2.09651	-2.73745	0.0195036
Lacviv1|1719716	Lacviv1	1719716	gene_1088	Repressed during mycorrhization	VIII	NA	NA	NA	NA	NA	NA	NA	1.14.13.-	With NADH or NADPH as one donor, and incorporation of one atom	PF00067	p450	Secondary metabolites biosynthesis, transport and catabolism	Cytochrome p450		OG0000305	56.1723	51.2241	55.5704	9.40165	3.586	20.4383	-3.02129	0.00019318
Lacviv1|1732090	Lacviv1	1732090	gene_1374	Repressed during mycorrhization	VIII	NA	NA	NA	NA	NA	NA	NA	NA	NA	PF13087,PF13086,PF13245,PF13604	AAA_12,AAA_11,AAA_19,AAA_30	Replication, recombination and repair	Other function	ATPases Associated with diverse cellular Activities	OG0009103	29.9736	31.8484	25.6314	3.27897	2.82131	4.55255	-2.79708	0.000469352
Lacviv1|1743025	Lacviv1	1743025	gene_8814	Repressed during mycorrhization	VIII	NA	NA	NA	NA	NA	NA	NA	NA	NA	NA	NA	NA	Unknown	Unknown	OG0010009	28.5093	33.8628	30.9668	1.3135	1.71534	1.81433	-4.23376	4.82e-17
Lacviv1|1744879	Lacviv1	1744879	gene_13424	Repressed during mycorrhization	VIII	NA	NA	NA	NA	NA	NA	NA	NA	NA	NA	NA	NA	Unknown	Unknown	OG0000784	31.0079	33.1551	38.5163	3.58223	4.36324	3.55736	-2.619	0.0294449
Lacviv1|1759589	Lacviv1	1759589	gene_4089	Repressed during mycorrhization	VIII	NA	NA	NA	NA	NA	NA	NA	NA	NA	NA	NA	NA	Unknown	Unknown	OG0007888	38.4478	36.8004	38.9552	4.90253	5.38462	5.81263	-2.56859	0.00272538
Lacviv1|675963	Lacviv1	675963	gene_4874	Repressed during mycorrhization	VIII	NA	NA	NA	NA	NA	NA	NA	1.14.13.12	Benzoate 4-monooxygenase.	PF00067	p450	Secondary metabolites biosynthesis, transport and catabolism	Cytochrome p450		OG0000737	59.4872	46.0094	55.4214	3.66833	4.58914	1.13766	-3.71358	1.35e-06
Lacviv1|697742	Lacviv1	697742	gene_1474	Repressed during mycorrhization	VIII	NA	NA	NA	NA	NA	NA	NA	NA	NA	NA	NA	NA	Unknown	Unknown	OG0004026	207.517	252.575	223.721	6.89202	7.20428	8.36076	-4.98488	9.22e-68
Lacviv1|821189	Lacviv1	821189	gene_13797	Repressed during mycorrhization	VIII	NA	NA	NA	NA	NA	NA	NA	NA	NA	PF14027	DUF4243	NA	Unknown	Unknown	OG0000399	679.862	662.613	727.68	21.5436	54.2998	45.1422	-3.90706	1.03e-07
Lacviv1|863638	Lacviv1	863638	gene_575	Repressed during mycorrhization	VIII	NA	NA	NA	NA	NA	NA	NA	NA	NA	PF00096	zf-C2H2	General function prediction only	Transcription factor	Holds a zinc finger domain	OG0008805	828.934	811.284	808.545	66.8318	130.702	66.1067	-3.2572	0.000210818
Lacviv1|960178	Lacviv1	960178	gene_13425	Repressed during mycorrhization	VIII	NA	NA	NA	NA	NA	NA	NA	NA	NA	NA	NA	NA	Unknown	Unknown	OG0002078	25.723	22.8873	28.4032	3.36891	3.74066	3.27816	-2.73752	0.00440396
Lacviv1|1021684	Lacviv1	1021684	gene_8210	Repressed during mycorrhization	X	NA	NA	NA	NA	NA	NA	NA	NA	NA	NA	NA	NA	Unknown	Unknown	OG0002212	924.362	939.566	965.821	172.889	180.04	133.906	-2.47893	0.0294763
Lacviv1|1232602	Lacviv1	1232602	gene_7743	Repressed during mycorrhization	X	NA	NA	NA	NA	NA	NA	NA	NA	NA	NA	NA	NA	Unknown	Unknown	OG0000936	34.3224	33.8048	40.9578	1.69315	2.75264	2.3852	-3.88232	1.27e-11
Lacviv1|1556236	Lacviv1	1556236	gene_5091	Repressed during mycorrhization	X	NA	NA	NA	NA	NA	NA	NA	NA	NA	NA	NA	NA	Unknown	Unknown	OG0011170	109.816	90.5792	89.4846	5.21021	8.33359	7.45869	-3.64004	1.32e-21
Lacviv1|1569278	Lacviv1	1569278	gene_13672	Repressed during mycorrhization	X	NA	NA	NA	NA	NA	NA	NA	NA	NA	NA	NA	NA	Unknown	Unknown	OG0000106	42.8935	35.9099	46.9553	1.23276	0.986266	0.978617	-4.55501	2.03e-26
Lacviv1|1606767	Lacviv1	1606767	gene_4267	Repressed during mycorrhization	X	NA	NA	NA	NA	NA	NA	NA	NA	NA	NA	NA	NA	Unknown	Unknown	OG0007189	1012.16	589.595	613.548	18.5211	30.3662	31.3062	-4.62721	6.28e-21
Lacviv1|1641161	Lacviv1	1641161	gene_11076	Repressed during mycorrhization	X	NA	NA	NA	NA	NA	NA	NA	NA	NA	NA	NA	NA	Unknown	Unknown	OG0008788	475.324	526.85	507.717	59.8987	83.9027	84.9939	-2.72031	0.00634301
Lacviv1|1677957	Lacviv1	1677957	gene_172	Repressed during mycorrhization	X	SSP	NA	NA	NA	NA	NA	NA	NA	NA	NA	NA	NA	Unknown	Unknown	OG0003732	43.8583	42.9316	44.3461	3.24636	1.82029	4.21524	-4.52697	1.78e-37
Lacviv1|1683541	Lacviv1	1683541	gene_5202	Repressed during mycorrhization	X	NA	NA	NA	NA	NA	NA	NA	NA	NA	NA	NA	NA	Unknown	Unknown	OG0004968	568.162	372.669	428.056	20.9463	45.3325	13.7573	-3.19649	0.0181685
Lacviv1|1685805	Lacviv1	1685805	gene_5802	Repressed during mycorrhization	X	NA	NA	NA	NA	NA	NA	NA	NA	NA	NA	NA	NA	Unknown	Unknown	OG0009619	223.18	254.342	251.578	18.1059	21.2861	14.2553	-3.56609	2.25e-14
Lacviv1|1690261	Lacviv1	1690261	gene_13670	Repressed during mycorrhization	X	NA	NA	NA	NA	NA	NA	NA	NA	NA	NA	NA	NA	Unknown	Unknown	OG0000253	48.8576	73.0003	80.4556	5.9887	4.17709	2.71419	-3.56502	7.59e-07
Lacviv1|241935	Lacviv1	241935	gene_13761	Repressed during mycorrhization	X	NA	NA	NA	NA	NA	NA	NA	NA	NA	NA	NA	NA	Unknown	Unknown	OG0000931	0.789648	1.15174	0	0	0.302263	0	-2.84781	8.05e-05
Lacviv1|594117	Lacviv1	594117	gene_5203	Repressed during mycorrhization	X	NA	NA	NA	NA	NA	NA	NA	NA	NA	NA	NA	NA	Unknown	Unknown	OG0005746	319.568	883.794	928.409	26.9889	23.3704	2.18769	-5.46559	1.7e-16
Lacviv1|MSTRG.2431	Lacviv1	NA	MSTRG.2431	Repressed during mycorrhization	X	NA	NA	NA	NA	NA	NA	NA	NA	NA	NA	NA	NA	Unknown	Unknown	OG0019304	13.7418	14.4488	10.7153	0.908269	1.64243	0.756053	-3.37617	0.000163506
Lacviv1|1022840	Lacviv1	1022840	gene_8237	Repressed during mycorrhization	XI	NA	NA	NA	NA	NA	NA	NA	NA	NA	NA	NA	NA	Unknown	Unknown	OG0003906	39.209	33.4982	38.0904	3.21495	4.27871	4.31492	-2.73594	0.0196757
Lacviv1|1258031	Lacviv1	1258031	gene_8402	Repressed during mycorrhization	XI	NA	NA	NA	NA	NA	NA	NA	NA	NA	NA	NA	NA	Unknown	Unknown	OG0009040	29.1011	27.8324	25.132	2.66969	2.06577	3.53079	-2.88694	0.00588127
Lacviv1|1354547	Lacviv1	1354547	gene_9225	Repressed during mycorrhization	XI	NA	NA	NA	NA	NA	NA	NA	NA	NA	NA	NA	NA	Unknown	Unknown	OG0003380	40.5187	51.1357	51.3015	7.41314	6.71649	6.80584	-2.68232	0.0218706
Lacviv1|1361132	Lacviv1	1361132	gene_9484	Repressed during mycorrhization	XI	SSP	NA	NA	NA	NA	NA	NA	NA	NA	NA	NA	NA	Unknown	Unknown	OG0004537	12.1856	12.6838	12.3411	0.457007	0.330061	0	-5.97885	2.46e-18
Lacviv1|140079	Lacviv1	140079	gene_12517	Repressed during mycorrhization	XI	NA	NA	NA	NA	NA	NA	NA	NA	NA	NA	NA	NA	Unknown	Unknown	OG0000109	6.66438	7.72772	6.14932	0.953144	1.51917	0.878213	-3.51268	6.7e-07
Lacviv1|1566030	Lacviv1	1566030	gene_9886	Repressed during mycorrhization	XI	NA	NA	NA	NA	NA	NA	NA	NA	NA	PF00067	p450	Lipid transport and metabolism ; Secondary metabolites biosynthesis, transport and catabolism	Cytochrome p450		OG0001194	91.8628	79.3447	80.2543	9.73884	14.088	11.7442	-2.69613	0.0465993
Lacviv1|1588404	Lacviv1	1588404	gene_1266	Repressed during mycorrhization	XI	NA	NA	NA	NA	NA	NA	NA	NA	NA	NA	NA	NA	Unknown	Unknown	OG0010069	111.822	109.869	98.9639	8.88084	11.2443	12.9789	-3.17043	1.46e-07
Lacviv1|1598880	Lacviv1	1598880	gene_5560	Repressed during mycorrhization	XI	NA	NA	NA	NA	NA	NA	NA	NA	NA	NA	NA	NA	Unknown	Unknown	OG0008340	398.377	563.989	509.818	33.731	88.5975	60.3496	-3.09475	0.0390725
Lacviv1|1600325	Lacviv1	1600325	gene_2388	Repressed during mycorrhization	XI	NA	NA	NA	NA	NA	NA	NA	NA	NA	PF12223	DUF3602	NA	Unknown	Unknown	OG0009277	1936.55	2159.86	2189.47	7.12929	9.23987	16.4164	-8.08253	7.41e-42
Lacviv1|1643957	Lacviv1	1643957	gene_9510	Repressed during mycorrhization	XI	NA	NA	NA	NA	NA	NA	NA	NA	NA	NA	NA	NA	Unknown	Unknown	OG0004537	61.9651	56.722	72.345	1.58394	4.83552	2.58522	-4.6357	8.32e-16
Lacviv1|1650953	Lacviv1	1650953	gene_10652	Repressed during mycorrhization	XI	NA	NA	NA	NA	NA	NA	NA	NA	NA	NA	NA	NA	Unknown	Unknown	OG0000213	2.86822	1.73872	4.03673	1.0091	1.26493	1.16521	-2.67823	0.0139615
Lacviv1|1656266	Lacviv1	1656266	gene_11054	Repressed during mycorrhization	XI	NA	NA	NA	NA	NA	NA	NA	NA	NA	NA	NA	NA	Unknown	Unknown	OG0009119	7.16965	8.73215	7.67407	0.950288	2.53994	1.98283	-3.76245	0.00889561
Lacviv1|1656285	Lacviv1	1656285	gene_11056	Repressed during mycorrhization	XI	NA	NA	NA	NA	NA	NA	NA	NA	NA	PF04749	PLAC8	NA	Other function	PLAC8	OG0000497	158.602	174.334	161.269	22.6929	28.8294	27.6752	-2.65109	0.00113304
Lacviv1|1658158	Lacviv1	1658158	gene_11239	Repressed during mycorrhization	XI	NA	NA	NA	NA	NA	NA	NA	NA	NA	NA	NA	NA	Unknown	Unknown	OG0004537	47.6719	51.8324	45.3763	3.08558	4.67935	2.96349	-3.70533	4.77e-09
Lacviv1|1672249	Lacviv1	1672249	gene_1679	Repressed during mycorrhization	XI	NA	NA	NA	NA	NA	NA	NA	NA	NA	NA	NA	NA	Unknown	Unknown	OG0005085	510.517	556.567	438.383	31.9465	28.6219	25.4524	-3.99712	6.97e-29
Lacviv1|1683380	Lacviv1	1683380	gene_7574	Repressed during mycorrhization	XI	NA	NA	NA	NA	NA	NA	NA	NA	NA	NA	NA	NA	Unknown	Unknown	OG0007873	82.5403	90.4561	90.48	4.17582	4.21672	4.79354	-3.92744	2.02e-31
Lacviv1|1711122	Lacviv1	1711122	gene_10866	Repressed during mycorrhization	XI	NA	NA	NA	NA	NA	NA	NA	NA	NA	NA	NA	NA	Unknown	Unknown	OG0004234	29.4046	40.0349	31.1594	3.39171	4.93632	4.40879	-3.29191	1.45e-09
Lacviv1|179088	Lacviv1	179088	gene_2528	Repressed during mycorrhization	XI	NA	NA	NA	NA	NA	NA	NA	NA	NA	NA	NA	NA	Unknown	Unknown	OG0007994	25.2289	25.7663	26.9204	1.01074	46.9378	47.1761	-3.26138	1.18e-21
Lacviv1|1803035	Lacviv1	1803035	gene_1803	Repressed during mycorrhization	XI	NA	NA	NA	NA	NA	NA	NA	NA	NA	NA	NA	NA	Unknown	Unknown	OG0004582	22.6557	26.5264	35.7736	0.514306	1.03092	0	-5.3151	5.61e-09
Lacviv1|1831480	Lacviv1	1831480	gene_6979	Repressed during mycorrhization	XI	NA	NA	NA	NA	NA	NA	NA	NA	NA	NA	NA	NA	Unknown	Unknown	OG0002005	45.4789	51.7803	53.2515	10.0733	7.59554	8.91515	-2.96834	1.91e-10
Lacviv1|255438	Lacviv1	255438	gene_2745	Repressed during mycorrhization	XI	NA	NA	NA	NA	NA	NA	NA	NA	NA	NA	NA	NA	Unknown	Unknown	OG0007633	158.565	152.963	175.28	17.1969	27.438	31.6096	-3.27661	2.07e-08
Lacviv1|276449	Lacviv1	276449	gene_10868	Repressed during mycorrhization	XI	NA	NA	NA	NA	NA	NA	NA	NA	NA	NA	NA	NA	Unknown	Unknown	OG0019099	114.009	118.172	136.98	8.79348	12.7555	1.7011	-4.34088	3.44e-06
Lacviv1|377982	Lacviv1	377982	gene_12803	Repressed during mycorrhization	XI	NA	NA	NA	NA	NA	NA	NA	NA	NA	NA	NA	NA	Unknown	Unknown	OG0012719	69.3174	65.4953	62.8447	3.72736	5.63966	4.91469	-3.54615	1.03e-09
Lacviv1|405601	Lacviv1	405601	gene_3371	Repressed during mycorrhization	XI	NA	NA	NA	NA	NA	NA	NA	NA	NA	PF08590,PF01713	DUF1771,Smr	Replication, recombination and repair	Other function	Holds a Smr domain	OG0011493	48.5933	38.0676	45.4289	3.32632	4.50301	3.13237	-3.33328	6.87e-06
Lacviv1|503959	Lacviv1	503959	gene_11236	Repressed during mycorrhization	XI	NA	NA	NA	NA	NA	NA	NA	NA	NA	NA	NA	NA	Unknown	Unknown	OG0004242	102.077	117.733	120.534	10.913	7.11979	11.7837	-3.4087	6.86e-10
Lacviv1|504181	Lacviv1	504181	gene_11241	Repressed during mycorrhization	XI	NA	NA	NA	NA	NA	NA	NA	NA	NA	NA	NA	NA	Unknown	Unknown	OG0000580	14.2615	17.8946	17.0841	1.85518	3.14756	1.87323	-3.08245	0.00278241
Lacviv1|578558	Lacviv1	578558	gene_13484	Repressed during mycorrhization	XI	NA	NA	NA	NA	NA	NA	NA	NA	NA	NA	NA	NA	Unknown	Unknown	OG0000109	12.3445	26.0268	18.4453	0.93697	1.03821	1.87218	-3.8107	4.2e-09
Lacviv1|626135	Lacviv1	626135	gene_13490	Repressed during mycorrhization	XI	NA	NA	NA	NA	NA	NA	NA	NA	NA	NA	NA	NA	Unknown	Unknown	OG0000828	2.56049	1.37016	2.46781	0.245978	0.269671	0	-4.09884	0.0132659
Lacviv1|650994	Lacviv1	650994	gene_4702	Repressed during mycorrhization	XI	NA	NA	NA	NA	NA	NA	NA	NA	NA	NA	NA	NA	Unknown	Unknown	OG0008781	430.032	456.535	447.664	29.7596	37.5158	27.0518	-3.57461	2.43e-17
Lacviv1|710165	Lacviv1	710165	gene_1603	Repressed during mycorrhization	XI	Secreted	NA	NA	NA	NA	NA	NA	3.4.-.-	Acting on peptide bonds (peptide hydrolases).	PF05577	Peptidase_S28	General function prediction only ; Posttranslational modification, protein turnover, chaperones	Protease	Exopeptidase family S28	OG0001739	385.749	379.762	386.772	8.3309	10.5411	3.86704	-5.6231	1.13e-54
Lacviv1|763700	Lacviv1	763700	gene_4601	Repressed during mycorrhization	XI	NA	NA	NA	NA	NA	NA	NA	NA	NA	NA	NA	NA	Unknown	Unknown	OG0000831	21.6405	0	15.336	1.47027	1.0546	1.52967	-3.2577	0.00374091
Lacviv1|77955	Lacviv1	77955	gene_2994	Repressed during mycorrhization	XI	NA	NA	NA	NA	NA	NA	NA	NA	NA	NA	NA	NA	Unknown	Unknown	OG0008645	156.854	137.984	122.405	16.6365	16.6845	21.6941	-2.73396	0.000749485
Lacviv1|854819	Lacviv1	854819	gene_495	Repressed during mycorrhization	XI	NA	NA	NA	NA	NA	NA	NA	NA	NA	NA	NA	NA	Unknown	Unknown	OG0008794	305.407	358.535	356.307	33.3179	45.1902	44.6717	-2.6675	0.0250364
Lacviv1|868243	Lacviv1	868243	gene_598	Repressed during mycorrhization	XI	NA	NA	NA	NA	NA	NA	NA	NA	NA	NA	NA	NA	Unknown	Unknown	OG0006663	79.7768	74.802	79.0103	12.428	9.38445	11.683	-2.40405	0.0456517
Lacviv1|MSTRG.3716	Lacviv1	NA	MSTRG.3716	Repressed during mycorrhization	XI	NA	116208038|GX|abH09	NA	NA	NA	NA	NA	NA	NA	PF05729	NACHT	NA	Other function	NACHT	OG0011152	34.0523	34.8222	32.1208	2.17999	5.21249	4.26089	-2.9536	0.0390725
Lacviv1|MSTRG.4823	Lacviv1	NA	MSTRG.4823	Repressed during mycorrhization	XI	NA	NA	NA	NA	NA	NA	NA	NA	NA	NA	NA	NA	Unknown	Unknown	OG0002356	34.4646	34.1177	36.7809	3.82749	5.51718	3.87484	-3.43339	6.86e-10
Lacviv1|MSTRG.9802	Lacviv1	NA	MSTRG.9802	Repressed during mycorrhization	XI	NA	NA	NA	NA	NA	NA	NA	NA	NA	PF17109	Goodbye	NA	Other function	Holds a Goodbye domain	OG0002964	18.2972	16.5803	16.652	2.71505	0.791202	1.25562	-3.07777	0.0292479
Lacviv1|1558482	Lacviv1	1558482	gene_5334	Repressed during mycorrhization	VII	NA	NA	NA	NA	NA	NA	NA	NA	NA	PF07690	MFS_1	Carbohydrate transport and metabolism	Transporter/Permease	Unknown transporter	OG0004772	40.6175	36.6288	34.8427	4.17072	4.93468	7.38157	-2.72544	0.0318821
Lacviv1|1561809	Lacviv1	1561809	gene_5132	Repressed during mycorrhization	VII	Secreted	NA	AA5_1	PartialPCWdegradation	NA	NA	NA	1.1.3.9	Galactose oxidase.	PF07250,PF09118	Glyoxal_oxid_N,DUF1929	NA	CAZyme	Copper radical oxidase	OG0008398	732.826	738.375	775.681	63.7676	107.291	91.6704	-2.92332	0.000132473
Lacviv1|1562263	Lacviv1	1562263	gene_6409	Repressed during mycorrhization	VII	NA	NA	NA	NA	NA	NA	NA	NA	NA	NA	NA	NA	Unknown	Unknown	OG0004544	19.6418	21.3559	23.0154	0.958842	2.21127	2.14134	-3.84085	0.000341649
Lacviv1|1565279	Lacviv1	1565279	gene_9095	Repressed during mycorrhization	VII	NA	39978263|GX|abH23	NA	NA	NA	NA	NA	3.1.1.3	Triacylglycerol lipase.	PF01764	Lipase_3	Lipid transport and metabolism	Lipase	Triacylglycerol lipase.	OG0002795	93.5895	106.188	91.9986	6.2153	6.59763	8.73767	-4.0264	1.36e-21
Lacviv1|1593012	Lacviv1	1593012	gene_697	Repressed during mycorrhization	VII	Secreted	NA	NA	NA	NA	NA	NA	NA	NA	NA	NA	NA	Unknown	Unknown	OG0004826	274.719	294.219	326.459	41.3954	73.9518	55.2681	-2.68504	0.0146584
Lacviv1|1649393	Lacviv1	1649393	gene_11682	Repressed during mycorrhization	VII	NA	NA	NA	NA	NA	NA	NA	2.6.1.13	Ornithine--oxo-acid aminotransferase.	PF00202	Aminotran_3	Amino acid transport and metabolism	Other function	Ornithine--oxo-acid aminotransferase.	OG0005794	620.365	662.081	548.399	45.0594	62.0819	97.4673	-2.93405	0.0153007
Lacviv1|1671853	Lacviv1	1671853	gene_932	Repressed during mycorrhization	VII	NA	NA	NA	NA	NA	NA	NA	NA	NA	PF02259,PF00454,PF11865,PF08771,PF02985,PF13646,PF14559,PF13513	FAT,PI3_PI4_kinase,DUF3385,FRB_dom,HEAT,HEAT_2,TPR_19,HEAT_EZ	Replication, recombination and repair	Other function	Phosphoinositide 3-kinase	OG0000569	14.6635	15.5034	12.3261	1.84335	1.87466	1.95495	-2.61682	0.0147574
Lacviv1|1671953	Lacviv1	1671953	gene_1076	Repressed during mycorrhization	VII	NA	NA	NA	NA	NA	NA	NA	NA	NA	PF00266	Aminotran_5	General function prediction only	Other function	Aminotransferase	OG0007623	167.239	177.782	137.859	27.6284	31.145	26.0012	-2.38946	0.0268244
Lacviv1|1672674	Lacviv1	1672674	gene_1900	Repressed during mycorrhization	VII	NA	NA	NA	NA	NA	NA	NA	NA	NA	PF00067	p450	Secondary metabolites biosynthesis, transport and catabolism	Cytochrome p450		OG0004682	57.0223	50.659	60.1973	3.56982	6.19847	4.1344	-3.54847	5.77e-08
Lacviv1|1676003	Lacviv1	1676003	gene_8091	Repressed during mycorrhization	VII	NA	NA	NA	NA	NA	NA	NA	NA	NA	PF01274	Malate_synthase	Energy production and conversion	Other function	Malate_synthase	OG0003713	357.9	363.664	348.742	11.9846	19.6745	18.124	-4.28826	2.39e-21
Lacviv1|1688722	Lacviv1	1688722	gene_10244	Repressed during mycorrhization	VII	NA	NA	NA	NA	NA	NA	NA	3.6.4.-	Acting on acid anhydrides; involved in cellular and	PF00176,PF00271,PF04851,PF13445	SNF2_N,Helicase_C,ResIII,zf-RING_UBOX	Replication, recombination and repair ; Transcription	Transcription factor	Helicase	OG0007521	148.906	139.407	128.562	11.0896	7.87367	5.80404	-3.96347	3.25e-15
Lacviv1|1701629	Lacviv1	1701629	gene_3135	Repressed during mycorrhization	VII	NA	NA	NA	NA	NA	NA	NA	3.6.3.8	Calcium-transporting ATPase.	PF00689,PF00122,PF13246,PF00702,PF00690	Cation_ATPase_C,E1-E2_ATPase,Cation_ATPase,Hydrolase,Cation_ATPase_N	Inorganic ion transport and metabolism	Transporter/Permease	Calcium-transporting ATPase.	OG0001786	238.662	240.501	224.534	21.1938	30.6271	23.952	-3.30265	4.96e-14
Lacviv1|1758025	Lacviv1	1758025	gene_8117	Repressed during mycorrhization	VII	NA	NA	NA	NA	NA	NA	NA	1.1.1.1	Alcohol dehydrogenase.	PF00465,PF13685	Fe-ADH,Fe-ADH_2	Energy production and conversion	Other function	Alcohol dehydrogenase.	OG0008250	320.799	344.526	337.423	29.3517	28.8702	29.5236	-3.44331	1.07e-29
Lacviv1|1765715	Lacviv1	1765715	gene_2224	Repressed during mycorrhization	VII	NA	NA	NA	NA	NA	NA	NA	6.3.2.25	Tubulin--tyrosine ligase.	PF03133	TTL	Posttranslational modification, protein turnover, chaperones	Other function	Tubulin--tyrosine ligase.	OG0002237	75.2588	72.3969	76.4499	9.93388	7.16646	10.3026	-3.06955	7.14e-08
Lacviv1|318878	Lacviv1	318878	gene_10835	Repressed during mycorrhization	VII	NA	NA	NA	NA	NA	NA	NA	1.3.1.33	Protochlorophyllide reductase.	PF00106,PF13561,PF08659,PF01370	adh_short,adh_short_C2,KR,Epimerase	Secondary metabolites biosynthesis, transport and catabolism	Other function	Protochlorophyllide reductase.	OG0000496	42.1221	42.4211	44.4563	2.88057	4.11953	4.71932	-3.21309	0.000749485
Lacviv1|333151	Lacviv1	333151	gene_3819	Repressed during mycorrhization	VII	NA	NA	NA	NA	NA	NA	NA	3.6.1.19	Nucleoside-triphosphate pyrophosphatase.	PF01725	Ham1p_like	Nucleotide transport and metabolism	Other function	Ham1p_like	OG0008278	137.085	143.656	115.844	23.591	4.41056	6.4258	-3.45127	0.00578573
Lacviv1|613268	Lacviv1	613268	gene_6991	Repressed during mycorrhization	VII	NA	NA	NA	NA	NA	NA	NA	4.1.3.1	Isocitrate lyase.	PF00463	ICL	Energy production and conversion	Other function	Isocitrate lyase.	OG0002804	19.7579	182.749	136.221	14.7739	19.4054	13.4196	-3.32308	1.33e-10
Lacviv1|1577278	Lacviv1	1577278	gene_4897	Repressed during mycorrhization	IX	NA	NA	NA	NA	NA	NA	NA	NA	NA	NA	NA	NA	Unknown	Unknown	OG0018688	65.6048	67.2404	55.1783	5.00693	7.04081	3.78923	-3.54828	3.77e-10
Lacviv1|1626073	Lacviv1	1626073	gene_6238	Repressed during mycorrhization	IX	NA	NA	NA	NA	NA	NA	NA	NA	NA	NA	NA	NA	Unknown	Unknown	OG0018850	105.808	97.7353	122.165	12.0795	7.74539	2.57286	-3.81399	0.000499839
Lacviv1|1682261	Lacviv1	1682261	gene_3820	Repressed during mycorrhization	IX	NA	NA	NA	NA	NA	NA	NA	NA	NA	NA	NA	NA	Unknown	Unknown	OG0004743	21.0957	27.1487	22.53	3.94352	1.65706	0.744291	-3.65531	0.0368097
Lacviv1|1686583	Lacviv1	1686583	gene_8653	Repressed during mycorrhization	IX	NA	NA	NA	NA	NA	NA	NA	NA	NA	NA	NA	NA	Unknown	Unknown	OG0001504	251.165	247.705	245.116	11.2592	14.8174	15.5707	-4.24986	3.43e-26
Lacviv1|1720799	Lacviv1	1720799	gene_1262	Repressed during mycorrhization	IX	NA	NA	NA	NA	NA	NA	NA	NA	NA	NA	NA	NA	Unknown	Unknown	OG0008048	11.3645	11.5876	14.3808	0.754704	0.858307	1.11046	-3.5955	0.0427561
Lacviv1|717707	Lacviv1	717707	gene_1680	Repressed during mycorrhization	IX	NA	NA	NA	NA	NA	NA	NA	NA	NA	NA	NA	NA	Unknown	Unknown	OG0019194	495.748	436.481	443.499	17.7174	40.7287	53.1845	-4.70241	6.47e-64
Lacviv1|808972	Lacviv1	808972	gene_5652	Repressed during mycorrhization	IX	NA	NA	NA	NA	NA	NA	NA	NA	NA	NA	NA	NA	Unknown	Unknown	OG0019216	70.9848	68.9815	61.3369	2.3218	4.47417	2.87577	-4.24238	9.69e-17
Lacviv1|MSTRG.1597	Lacviv1	NA	MSTRG.1597	Repressed during mycorrhization	IX	NA	NA	NA	NA	NA	NA	NA	NA	NA	NA	NA	NA	Unknown	Unknown	OG0012909	17.8824	15.9692	14.7852	1.35759	2.05885	1.11464	-4.6764	9.66e-17
Lacviv1|MSTRG.2665	Lacviv1	NA	MSTRG.2665	Repressed during mycorrhization	IX	NA	NA	NA	NA	NA	NA	NA	NA	NA	NA	NA	NA	Unknown	Unknown	OG0019308	33.3187	29.4958	32.2674	2.457	6.08768	2.75865	-3.68943	0.0016964
Lacviv1|MSTRG.2902	Lacviv1	NA	MSTRG.2902	Repressed during mycorrhization	IX	NA	NA	NA	NA	NA	NA	NA	NA	NA	NA	NA	NA	Unknown	Unknown	OG0019310	62.0884	56.8007	63.8288	7.14561	6.13888	6.12328	-4.10075	3.04e-18
Lacviv1|MSTRG.3129	Lacviv1	NA	MSTRG.3129	Repressed during mycorrhization	IX	NA	NA	NA	NA	NA	NA	NA	NA	NA	NA	NA	NA	Unknown	Unknown	OG0019314	10.1777	13.3687	10.8713	2.8691	3.40799	3.45251	-2.85936	0.000261104
Lacviv1|MSTRG.9666	Lacviv1	NA	MSTRG.9666	Repressed during mycorrhization	IX	NA	NA	NA	NA	NA	NA	NA	NA	NA	NA	NA	NA	Unknown	Unknown	OG0019471	38.8172	44.2018	35.7787	1.89309	3.11203	2.48986	-3.85172	3.24e-08
Lacviv1|MSTRG.9346	Lacviv1	NA	MSTRG.9346	Repressed during mycorrhization	NA	NA	NA	NA	NA	NA	NA	NA	NA	NA	NA	NA	NA	Unknown	Unknown	NA	62.0983	65.6169	66.0213	8.25248	8.79143	5.17431	-2.90903	3.63e-05
Lacviv1|MSTRG.9586	Lacviv1	NA	MSTRG.9586	Repressed during mycorrhization	NA	NA	NA	NA	NA	NA	NA	NA	NA	NA	NA	NA	NA	Unknown	Unknown	NA	138.929	138.484	139.458	3.24273	1.87829	2.78836	-5.42688	1.84e-29
